# Supplementary material for: Proteomics of Secretory and Endocytic Organelles in Giardia lamblia
Source: PubMed Central journal article supplement (PMC3986054; doi:10.1371/journal.pone.0094089), 2014-04-14
Supplement: pone.0094089.s010.pdf [file pone.0094089.s010.pdf]

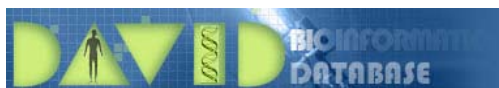

## Functional Annotation Clustering

[Help and Manual](#)

Current Gene List: Contaminants  
Current Background: Giardia intestinalis  
1031 DAVID IDs

Options Classification Stringency Medium

Rerun using options

Create Sublist

56 Cluster(s)

[Download File](#)

|                          |                 | Enrichment Score: 16.12                                                       |    |  | Count | P_Value | Benjamini |
|--------------------------|-----------------|-------------------------------------------------------------------------------|----|--|-------|---------|-----------|
| Annotation Cluster 1     |                 |                                                                               |    |  |       |         |           |
| <input type="checkbox"/> | GOTERM_BP_FAT   | <a href="#">translation</a>                                                   | RT |  | 101   | 1.2E-29 | 5.0E-27   |
| <input type="checkbox"/> | SP_PIR_KEYWORDS | <a href="#">ribosomal protein</a>                                             | RT |  | 68    | 1.8E-27 | 1.8E-25   |
| <input type="checkbox"/> | GOTERM_MF_FAT   | <a href="#">structural constituent of ribosome</a>                            | RT |  | 65    | 3.2E-24 | 1.2E-21   |
| <input type="checkbox"/> | GOTERM_MF_FAT   | <a href="#">structural molecule activity</a>                                  | RT |  | 72    | 7.1E-22 | 1.3E-19   |
| <input type="checkbox"/> | GOTERM_CC_FAT   | <a href="#">ribosome</a>                                                      | RT |  | 70    | 5.2E-19 | 5.6E-17   |
| <input type="checkbox"/> | KEGG_PATHWAY    | <a href="#">Ribosome</a>                                                      | RT |  | 65    | 3.1E-13 | 1.4E-11   |
| <input type="checkbox"/> | GOTERM_CC_FAT   | <a href="#">ribonucleoprotein complex</a>                                     | RT |  | 72    | 5.0E-8  | 2.7E-6    |
| <input type="checkbox"/> | GOTERM_CC_FAT   | <a href="#">intracellular non-membrane-bounded organelle</a>                  | RT |  | 94    | 4.6E-4  | 1.2E-2    |
| <input type="checkbox"/> | GOTERM_CC_FAT   | <a href="#">non-membrane-bounded organelle</a>                                | RT |  | 94    | 4.6E-4  | 1.2E-2    |
| Annotation Cluster 2     |                 |                                                                               |    |  |       |         |           |
|                          |                 | Enrichment Score: 5.33                                                        |    |  | Count | P_Value | Benjamini |
| <input type="checkbox"/> | SP_PIR_KEYWORDS | <a href="#">Aminoacyl-tRNA synthetase</a>                                     | RT |  | 23    | 4.2E-10 | 2.0E-8    |
| <input type="checkbox"/> | GOTERM_MF_FAT   | <a href="#">aminoacyl-tRNA ligase activity</a>                                | RT |  | 24    | 6.5E-10 | 7.7E-8    |
| <input type="checkbox"/> | GOTERM_MF_FAT   | <a href="#">ligase activity, forming aminoacyl-tRNA and related compounds</a> | RT |  | 24    | 6.5E-10 | 7.7E-8    |
| <input type="checkbox"/> | GOTERM_MF_FAT   | <a href="#">ligase activity, forming carbon-oxygen bonds</a>                  | RT |  | 24    | 6.5E-10 | 7.7E-8    |
| <input type="checkbox"/> | GOTERM_BP_FAT   | <a href="#">tRNA aminoacylation</a>                                           | RT |  | 23    | 2.8E-8  | 6.0E-6    |
| <input type="checkbox"/> | GOTERM_BP_FAT   | <a href="#">amino acid activation</a>                                         | RT |  | 23    | 2.8E-8  | 6.0E-6    |
| <input type="checkbox"/> | GOTERM_BP_FAT   | <a href="#">tRNA aminoacylation for protein translation</a>                   | RT |  | 22    | 6.7E-8  | 9.6E-6    |
| <input type="checkbox"/> | KEGG_PATHWAY    | <a href="#">Aminoacyl-tRNA biosynthesis</a>                                   | RT |  | 21    | 1.3E-4  | 3.0E-3    |
| <input type="checkbox"/> | INTERPRO        | <a href="#">Aminoacyl-tRNA synthetase, class II, conserved region</a>         | RT |  | 9     | 3.3E-4  | 3.7E-2    |
| <input type="checkbox"/> | SP_PIR_KEYWORDS | <a href="#">protein biosynthesis</a>                                          | RT |  | 10    | 3.5E-4  | 5.0E-3    |
| <input type="checkbox"/> | GOTERM_BP_FAT   | <a href="#">tRNA metabolic process</a>                                        | RT |  | 27    | 1.4E-3  | 7.3E-2    |
| <input type="checkbox"/> | INTERPRO        | <a href="#">Aminoacyl-tRNA synthetase, class I, conserved site</a>            | RT |  | 8     | 3.5E-3  | 2.1E-1    |
| <input type="checkbox"/> | GOTERM_BP_FAT   | <a href="#">ncRNA metabolic process</a>                                       | RT |  | 30    | 1.8E-2  | 4.1E-1    |
| <input type="checkbox"/> | SP_PIR_KEYWORDS | <a href="#">ligase</a>                                                        | RT |  | 27    | 2.1E-2  | 1.2E-1    |
| <input type="checkbox"/> | INTERPRO        | <a href="#">Rossmann-like alpha/beta/alpha sandwich fold</a>                  | RT |  | 10    | 7.0E-2  | 9.3E-1    |
| Annotation Cluster 3     |                 |                                                                               |    |  |       |         |           |
|                          |                 | Enrichment Score: 3.02                                                        |    |  | Count | P_Value | Benjamini |
| <input type="checkbox"/> | SP_PIR_KEYWORDS | <a href="#">cytoplasm</a>                                                     | RT |  | 17    | 1.6E-6  | 5.1E-5    |
| <input type="checkbox"/> | SP_PIR_KEYWORDS | <a href="#">Chaperone</a>                                                     | RT |  | 12    | 4.6E-5  | 9.1E-4    |
| <input type="checkbox"/> | GOTERM_MF_FAT   | <a href="#">unfolded protein binding</a>                                      | RT |  | 17    | 1.7E-4  | 1.2E-2    |
| <input type="checkbox"/> | INTERPRO        | <a href="#">Chaperonin Cpn60/TCP-1</a>                                        | RT |  | 9     | 3.3E-4  | 3.7E-2    |
| <input type="checkbox"/> | GOTERM_BP_FAT   | <a href="#">protein folding</a>                                               | RT |  | 22    | 1.0E-3  | 5.9E-2    |
| <input type="checkbox"/> | INTERPRO        | <a href="#">Chaperone, tailless complex polypeptide 1</a>                     | RT |  | 8     | 1.0E-3  | 9.8E-2    |
| <input type="checkbox"/> | INTERPRO        | <a href="#">Chaperonin TCP-1, conserved site</a>                              | RT |  | 8     | 3.5E-3  | 2.1E-1    |
| <input type="checkbox"/> | PIR_SUPERFAMILY | PIRSF002584: molecular chaperone t-complex-type                               | RT |  | 8     | 6.6E-2  | 1.0E0     |
| Annotation Cluster 4     |                 |                                                                               |    |  |       |         |           |
|                          |                 | Enrichment Score: 3.02                                                        |    |  | Count | P_Value | Benjamini |
| <input type="checkbox"/> | GOTERM_BP_FAT   | <a href="#">monosaccharide metabolic process</a>                              | RT |  | 21    | 5.3E-6  | 5.7E-4    |
| <input type="checkbox"/> | GOTERM_BP_FAT   | <a href="#">hexose metabolic process</a>                                      | RT |  | 18    | 5.5E-5  | 4.7E-3    |
| <input type="checkbox"/> | GOTERM_BP_FAT   | <a href="#">glucose metabolic process</a>                                     | RT |  | 18    | 5.5E-5  | 4.7E-3    |
| <input type="checkbox"/> | GOTERM_BP_FAT   | <a href="#">alcohol catabolic process</a>                                     | RT |  | 13    | 7.0E-4  | 4.9E-2    |
| <input type="checkbox"/> | GOTERM_BP_FAT   | <a href="#">monosaccharide catabolic process</a>                              | RT |  | 13    | 7.0E-4  | 4.9E-2    |
| <input type="checkbox"/> | GOTERM_BP_FAT   | <a href="#">hexose catabolic process</a>                                      | RT |  | 13    | 7.0E-4  | 4.9E-2    |
| <input type="checkbox"/> | GOTERM_BP_FAT   | <a href="#">cellular carbohydrate catabolic process</a>                       | RT |  | 13    | 7.0E-4  | 4.9E-2    |
| <input type="checkbox"/> | GOTERM_BP_FAT   | <a href="#">glucose catabolic process</a>                                     | RT |  | 13    | 7.0E-4  | 4.9E-2    |

| <input type="checkbox"/> |                      |                                                                                         |    |  |  |  |  |       |         |           |  |
|--------------------------|----------------------|-----------------------------------------------------------------------------------------|----|--|--|--|--|-------|---------|-----------|--|
| <input type="checkbox"/> | GOTERM_BP_FAT        | <a href="#">carbohydrate catabolic process</a>                                          | RT |  |  |  |  | 13    | 7.0E-4  | 4.9E-2    |  |
| <input type="checkbox"/> | GOTERM_BP_FAT        | <a href="#">generation of precursor metabolites and energy</a>                          | RT |  |  |  |  | 19    | 2.9E-3  | 1.2E-1    |  |
| <input type="checkbox"/> | GOTERM_BP_FAT        | <a href="#">glycolysis</a>                                                              | RT |  |  |  |  | 10    | 6.7E-3  | 2.0E-1    |  |
| <input type="checkbox"/> | SP_PIR_KEYWORDS      | <a href="#">glycolysis</a>                                                              | RT |  |  |  |  | 5     | 1.0E-1  | 3.7E-1    |  |
| <input type="checkbox"/> | KEGG_PATHWAY         | <a href="#">Glycolysis / Gluconeogenesis</a>                                            | RT |  |  |  |  | 7     | 1.4E-1  | 8.1E-1    |  |
|                          | Annotation Cluster 5 | Enrichment Score: 2.71                                                                  |    |  |  |  |  | Count | P_Value | Benjamini |  |
| <input type="checkbox"/> | SMART                | <a href="#">ANX</a>                                                                     | RT |  |  |  |  | 11    | 1.2E-4  | 5.4E-3    |  |
| <input type="checkbox"/> | INTERPRO             | <a href="#">Alpha giardin</a>                                                           | RT |  |  |  |  | 11    | 1.5E-4  | 3.3E-2    |  |
| <input type="checkbox"/> | INTERPRO             | <a href="#">Annexin</a>                                                                 | RT |  |  |  |  | 13    | 1.8E-4  | 2.3E-2    |  |
| <input type="checkbox"/> | GOTERM_MF_FAT        | <a href="#">calcium-dependent phospholipid binding</a>                                  | RT |  |  |  |  | 17    | 4.3E-4  | 2.5E-2    |  |
| <input type="checkbox"/> | SP_PIR_KEYWORDS      | <a href="#">annexin</a>                                                                 | RT |  |  |  |  | 13    | 7.8E-4  | 8.5E-3    |  |
| <input type="checkbox"/> | INTERPRO             | <a href="#">Annexin repeat</a>                                                          | RT |  |  |  |  | 11    | 1.2E-3  | 1.1E-1    |  |
| <input type="checkbox"/> | GOTERM_MF_FAT        | <a href="#">phospholipid binding</a>                                                    | RT |  |  |  |  | 18    | 3.4E-3  | 1.6E-1    |  |
| <input type="checkbox"/> | GOTERM_MF_FAT        | <a href="#">calcium ion binding</a>                                                     | RT |  |  |  |  | 22    | 5.2E-2  | 8.0E-1    |  |
| <input type="checkbox"/> | GOTERM_MF_FAT        | <a href="#">lipid binding</a>                                                           | RT |  |  |  |  | 19    | 5.4E-2  | 7.6E-1    |  |
| <input type="checkbox"/> | GOTERM_BP_FAT        | <a href="#">cytoskeleton organization</a>                                               | RT |  |  |  |  | 11    | 6.5E-2  | 7.8E-1    |  |
|                          | Annotation Cluster 6 | Enrichment Score: 2.26                                                                  |    |  |  |  |  | Count | P_Value | Benjamini |  |
| <input type="checkbox"/> | INTERPRO             | <a href="#">Proteasome, subunit alpha/beta</a>                                          | RT |  |  |  |  | 14    | 1.0E-6  | 9.2E-4    |  |
| <input type="checkbox"/> | SP_PIR_KEYWORDS      | <a href="#">proteasome</a>                                                              | RT |  |  |  |  | 18    | 2.6E-6  | 6.5E-5    |  |
| <input type="checkbox"/> | INTERPRO             | <a href="#">Proteasome, alpha and beta subunits</a>                                     | RT |  |  |  |  | 13    | 3.3E-6  | 1.5E-3    |  |
| <input type="checkbox"/> | GOTERM_MF_FAT        | <a href="#">threonine-type endopeptidase activity</a>                                   | RT |  |  |  |  | 14    | 1.4E-5  | 1.2E-3    |  |
| <input type="checkbox"/> | GOTERM_MF_FAT        | <a href="#">threonine-type peptidase activity</a>                                       | RT |  |  |  |  | 14    | 1.4E-5  | 1.2E-3    |  |
| <input type="checkbox"/> | GOTERM_CC_FAT        | <a href="#">proteasome complex</a>                                                      | RT |  |  |  |  | 19    | 3.8E-4  | 1.3E-2    |  |
| <input type="checkbox"/> | GOTERM_CC_FAT        | <a href="#">proteasome core complex</a>                                                 | RT |  |  |  |  | 14    | 5.7E-4  | 1.2E-2    |  |
| <input type="checkbox"/> | KEGG_PATHWAY         | <a href="#">Proteasome</a>                                                              | RT |  |  |  |  | 25    | 1.3E-3  | 1.9E-2    |  |
| <input type="checkbox"/> | GOTERM_CC_FAT        | <a href="#">cytosol</a>                                                                 | RT |  |  |  |  | 23    | 2.0E-3  | 3.5E-2    |  |
| <input type="checkbox"/> | INTERPRO             | <a href="#">Proteasome, alpha-subunit, conserved site</a>                               | RT |  |  |  |  | 7     | 3.1E-3  | 2.3E-1    |  |
| <input type="checkbox"/> | SP_PIR_KEYWORDS      | <a href="#">threonine protease</a>                                                      | RT |  |  |  |  | 6     | 1.8E-2  | 1.2E-1    |  |
| <input type="checkbox"/> | GOTERM_BP_FAT        | <a href="#">protein catabolic process</a>                                               | RT |  |  |  |  | 23    | 2.3E-2  | 4.6E-1    |  |
| <input type="checkbox"/> | GOTERM_MF_FAT        | <a href="#">peptidase activity</a>                                                      | RT |  |  |  |  | 38    | 2.5E-2  | 6.0E-1    |  |
| <input type="checkbox"/> | SP_PIR_KEYWORDS      | <a href="#">Protease</a>                                                                | RT |  |  |  |  | 19    | 2.8E-2  | 1.4E-1    |  |
| <input type="checkbox"/> | GOTERM_BP_FAT        | <a href="#">macromolecule catabolic process</a>                                         | RT |  |  |  |  | 23    | 3.3E-2  | 5.7E-1    |  |
| <input type="checkbox"/> | GOTERM_MF_FAT        | <a href="#">peptidase activity, acting on L-amino acid peptides</a>                     | RT |  |  |  |  | 32    | 5.7E-2  | 7.3E-1    |  |
| <input type="checkbox"/> | GOTERM_MF_FAT        | <a href="#">endopeptidase activity</a>                                                  | RT |  |  |  |  | 22    | 1.1E-1  | 8.4E-1    |  |
| <input type="checkbox"/> | GOTERM_BP_FAT        | <a href="#">proteolysis involved in cellular protein catabolic process</a>              | RT |  |  |  |  | 18    | 1.4E-1  | 9.2E-1    |  |
| <input type="checkbox"/> | GOTERM_BP_FAT        | <a href="#">cellular protein catabolic process</a>                                      | RT |  |  |  |  | 18    | 1.4E-1  | 9.2E-1    |  |
| <input type="checkbox"/> | GOTERM_BP_FAT        | <a href="#">ubiquitin-dependent protein catabolic process</a>                           | RT |  |  |  |  | 9     | 1.6E-1  | 9.5E-1    |  |
| <input type="checkbox"/> | PIR_SUPERFAMILY      | PIRSF001212:multicatalytic endopeptidase complex chain C9                               | RT |  |  |  |  | 6     | 1.7E-1  | 1.0E0     |  |
| <input type="checkbox"/> | GOTERM_BP_FAT        | <a href="#">cellular macromolecule catabolic process</a>                                | RT |  |  |  |  | 18    | 1.8E-1  | 9.5E-1    |  |
| <input type="checkbox"/> | GOTERM_BP_FAT        | <a href="#">proteolysis</a>                                                             | RT |  |  |  |  | 36    | 6.2E-1  | 1.0E0     |  |
| <input type="checkbox"/> | GOTERM_BP_FAT        | <a href="#">modification-dependent protein catabolic process</a>                        | RT |  |  |  |  | 11    | 6.7E-1  | 1.0E0     |  |
| <input type="checkbox"/> | GOTERM_BP_FAT        | <a href="#">modification-dependent macromolecule catabolic process</a>                  | RT |  |  |  |  | 11    | 6.7E-1  | 1.0E0     |  |
|                          | Annotation Cluster 7 | Enrichment Score: 2.15                                                                  |    |  |  |  |  | Count | P_Value | Benjamini |  |
| <input type="checkbox"/> | INTERPRO             | <a href="#">Thioredoxin-like</a>                                                        | RT |  |  |  |  | 12    | 5.0E-5  | 1.5E-2    |  |
| <input type="checkbox"/> | INTERPRO             | <a href="#">Thioredoxin fold</a>                                                        | RT |  |  |  |  | 16    | 1.6E-4  | 2.8E-2    |  |
| <input type="checkbox"/> | GOTERM_BP_FAT        | <a href="#">cellular homeostasis</a>                                                    | RT |  |  |  |  | 15    | 3.5E-3  | 1.3E-1    |  |
| <input type="checkbox"/> | GOTERM_BP_FAT        | <a href="#">cell redox homeostasis</a>                                                  | RT |  |  |  |  | 14    | 6.6E-3  | 2.1E-1    |  |
| <input type="checkbox"/> | GOTERM_BP_FAT        | <a href="#">homeostatic process</a>                                                     | RT |  |  |  |  | 15    | 7.4E-3  | 2.0E-1    |  |
| <input type="checkbox"/> | INTERPRO             | <a href="#">Thioredoxin domain</a>                                                      | RT |  |  |  |  | 6     | 9.4E-3  | 4.1E-1    |  |
| <input type="checkbox"/> | INTERPRO             | <a href="#">Thioredoxin, core</a>                                                       | RT |  |  |  |  | 6     | 2.5E-2  | 7.4E-1    |  |
| <input type="checkbox"/> | INTERPRO             | <a href="#">Thioredoxin-like subdomain</a>                                              | RT |  |  |  |  | 5     | 2.7E-2  | 7.5E-1    |  |
| <input type="checkbox"/> | GOTERM_MF_FAT        | <a href="#">antioxidant activity</a>                                                    | RT |  |  |  |  | 6     | 6.1E-2  | 7.1E-1    |  |
| <input type="checkbox"/> | INTERPRO             | <a href="#">Thioredoxin, conserved site</a>                                             | RT |  |  |  |  | 5     | 6.3E-2  | 9.2E-1    |  |
| <input type="checkbox"/> | INTERPRO             | <a href="#">Alkyl hydroperoxide reductase/ Thiol specific antioxidant/ Mal allergen</a> | RT |  |  |  |  | 5     | 6.3E-2  | 9.2E-1    |  |
|                          | Annotation Cluster 8 | Enrichment Score: 2.05                                                                  |    |  |  |  |  | Count | P_Value | Benjamini |  |
| <input type="checkbox"/> | INTERPRO             | <a href="#">Aminoacyl-tRNA synthetase, class II, conserved region</a>                   | RT |  |  |  |  | 9     | 3.3E-4  | 3.7E-2    |  |

| <input type="checkbox"/> | Category              | Term                                                                                  | RT | Bar | Count | P_Value | Benjamini |
|--------------------------|-----------------------|---------------------------------------------------------------------------------------|----|-----|-------|---------|-----------|
| <input type="checkbox"/> | INTERPRO              | <a href="#">Aminoacyl-tRNA synthetase, class II (G, H, P and S), conserved region</a> | RT |     | 5     | 2.7E-2  | 7.5E-1    |
| <input type="checkbox"/> | INTERPRO              | <a href="#">Anticodon-binding</a>                                                     | RT |     | 4     | 7.7E-2  | 9.4E-1    |
|                          | Annotation Cluster 9  | Enrichment Score: 1.96                                                                |    |     | Count | P_Value | Benjamini |
| <input type="checkbox"/> | SMART                 | <a href="#">AAA</a>                                                                   | RT |     | 29    | 6.7E-4  | 2.0E-2    |
| <input type="checkbox"/> | INTERPRO              | <a href="#">ATPase, AAA-type, conserved site</a>                                      | RT |     | 10    | 6.5E-3  | 3.2E-1    |
| <input type="checkbox"/> | INTERPRO              | <a href="#">26S proteasome subunit P45</a>                                            | RT |     | 5     | 2.7E-2  | 7.5E-1    |
| <input type="checkbox"/> | INTERPRO              | <a href="#">ATPase, AAA-type, core</a>                                                | RT |     | 13    | 3.4E-2  | 8.1E-1    |
| <input type="checkbox"/> | INTERPRO              | <a href="#">ATPase, AAA+ type, core</a>                                               | RT |     | 29    | 3.7E-2  | 8.2E-1    |
|                          | Annotation Cluster 10 | Enrichment Score: 1.24                                                                |    |     | Count | P_Value | Benjamini |
| <input type="checkbox"/> | INTERPRO              | <a href="#">Aminoacyl-tRNA synthetase, class II, conserved region</a>                 | RT |     | 9     | 3.3E-4  | 3.7E-2    |
| <input type="checkbox"/> | INTERPRO              | <a href="#">Nucleic acid binding, OB-fold, tRNA/helicase-type</a>                     | RT |     | 4     | 7.7E-2  | 9.4E-1    |
| <input type="checkbox"/> | INTERPRO              | <a href="#">Aminoacyl-tRNA synthetase, class II (D, K and N)</a>                      | RT |     | 3     | 2.0E-1  | 1.0E0     |
| <input type="checkbox"/> | INTERPRO              | <a href="#">Aminoacyl-tRNA synthetase, class II (D, K and N)-like</a>                 | RT |     | 3     | 2.0E-1  | 1.0E0     |
| <input type="checkbox"/> | PIR_SUPERFAMILY       | PIRSF001525: lysine-tRNA ligase                                                       | RT |     | 3     | 5.8E-1  | 1.0E0     |
|                          | Annotation Cluster 11 | Enrichment Score: 1.2                                                                 |    |     | Count | P_Value | Benjamini |
| <input type="checkbox"/> | GOTERM_MF_FAT         | <a href="#">translation factor activity, nucleic acid binding</a>                     | RT |     | 19    | 1.4E-2  | 4.2E-1    |
| <input type="checkbox"/> | SP_PIR_KEYWORDS       | <a href="#">Initiation factor</a>                                                     | RT |     | 11    | 6.5E-2  | 2.6E-1    |
| <input type="checkbox"/> | GOTERM_MF_FAT         | <a href="#">translation initiation factor activity</a>                                | RT |     | 14    | 7.0E-2  | 7.5E-1    |
| <input type="checkbox"/> | GOTERM_BP_FAT         | <a href="#">translational initiation</a>                                              | RT |     | 7     | 2.6E-1  | 9.8E-1    |
|                          | Annotation Cluster 12 | Enrichment Score: 1.08                                                                |    |     | Count | P_Value | Benjamini |
| <input type="checkbox"/> | GOTERM_MF_FAT         | <a href="#">cofactor binding</a>                                                      | RT |     | 21    | 7.5E-3  | 2.9E-1    |
| <input type="checkbox"/> | GOTERM_MF_FAT         | <a href="#">vitamin B6 binding</a>                                                    | RT |     | 8     | 2.9E-2  | 6.2E-1    |
| <input type="checkbox"/> | GOTERM_MF_FAT         | <a href="#">pyridoxal phosphate binding</a>                                           | RT |     | 8     | 2.9E-2  | 6.2E-1    |
| <input type="checkbox"/> | SP_PIR_KEYWORDS       | <a href="#">Aminotransferase</a>                                                      | RT |     | 5     | 4.6E-2  | 2.0E-1    |
| <input type="checkbox"/> | INTERPRO              | <a href="#">Pyridoxal phosphate-dependent transferase, major region, subdomain 1</a>  | RT |     | 6     | 5.1E-2  | 8.8E-1    |
| <input type="checkbox"/> | GOTERM_MF_FAT         | <a href="#">vitamin binding</a>                                                       | RT |     | 8     | 5.6E-2  | 7.5E-1    |
| <input type="checkbox"/> | GOTERM_MF_FAT         | <a href="#">transaminase activity</a>                                                 | RT |     | 5     | 5.8E-2  | 7.2E-1    |
| <input type="checkbox"/> | INTERPRO              | <a href="#">Pyridoxal phosphate-dependent transferase, major region, subdomain 2</a>  | RT |     | 3     | 2.0E-1  | 1.0E0     |
| <input type="checkbox"/> | INTERPRO              | <a href="#">Aminotransferase, class V/Cysteine desulfurase</a>                        | RT |     | 3     | 2.0E-1  | 1.0E0     |
| <input type="checkbox"/> | GOTERM_MF_FAT         | <a href="#">transferase activity, transferring nitrogenous groups</a>                 | RT |     | 5     | 2.1E-1  | 9.5E-1    |
| <input type="checkbox"/> | INTERPRO              | <a href="#">Aminotransferase, class I and II</a>                                      | RT |     | 3     | 4.5E-1  | 1.0E0     |
| <input type="checkbox"/> | KEGG_PATHWAY          | <a href="#">Alanine, aspartate and glutamate metabolism</a>                           | RT |     | 3     | 6.2E-1  | 9.9E-1    |
|                          | Annotation Cluster 13 | Enrichment Score: 1.03                                                                |    |     | Count | P_Value | Benjamini |
| <input type="checkbox"/> | SP_PIR_KEYWORDS       | <a href="#">lyase</a>                                                                 | RT |     | 11    | 4.4E-2  | 2.0E-1    |
| <input type="checkbox"/> | GOTERM_MF_FAT         | <a href="#">carbon-nitrogen lyase activity</a>                                        | RT |     | 4     | 1.3E-1  | 8.6E-1    |
| <input type="checkbox"/> | GOTERM_MF_FAT         | <a href="#">ammonia-lyase activity</a>                                                | RT |     | 4     | 1.3E-1  | 8.6E-1    |
|                          | Annotation Cluster 14 | Enrichment Score: 1.03                                                                |    |     | Count | P_Value | Benjamini |
| <input type="checkbox"/> | SP_PIR_KEYWORDS       | <a href="#">gtp-binding</a>                                                           | RT |     | 21    | 2.1E-2  | 1.3E-1    |
| <input type="checkbox"/> | INTERPRO              | <a href="#">Small GTP-binding protein</a>                                             | RT |     | 11    | 3.8E-2  | 8.2E-1    |
| <input type="checkbox"/> | GOTERM_MF_FAT         | <a href="#">guanyl ribonucleotide binding</a>                                         | RT |     | 24    | 5.4E-2  | 7.8E-1    |
| <input type="checkbox"/> | GOTERM_MF_FAT         | <a href="#">GTP binding</a>                                                           | RT |     | 24    | 5.4E-2  | 7.8E-1    |
| <input type="checkbox"/> | GOTERM_MF_FAT         | <a href="#">guanyl nucleotide binding</a>                                             | RT |     | 24    | 5.4E-2  | 7.8E-1    |
| <input type="checkbox"/> | GOTERM_MF_FAT         | <a href="#">GTPase activity</a>                                                       | RT |     | 9     | 2.3E-1  | 9.6E-1    |
| <input type="checkbox"/> | GOTERM_BP_FAT         | <a href="#">small GTPase mediated signal transduction</a>                             | RT |     | 9     | 3.1E-1  | 9.9E-1    |
| <input type="checkbox"/> | GOTERM_BP_FAT         | <a href="#">intracellular signaling cascade</a>                                       | RT |     | 9     | 6.8E-1  | 1.0E0     |
|                          | Annotation Cluster 15 | Enrichment Score: 0.98                                                                |    |     | Count | P_Value | Benjamini |
| <input type="checkbox"/> | SP_PIR_KEYWORDS       | <a href="#">threonine protease</a>                                                    | RT |     | 6     | 1.8E-2  | 1.2E-1    |
| <input type="checkbox"/> | INTERPRO              | <a href="#">Proteasome, beta-type subunit, conserved site</a>                         | RT |     | 4     | 7.7E-2  | 9.4E-1    |
| <input type="checkbox"/> | SP_PIR_KEYWORDS       | <a href="#">nucleus</a>                                                               | RT |     | 10    | 8.6E-1  | 9.9E-1    |
|                          | Annotation Cluster 16 | Enrichment Score: 0.95                                                                |    |     | Count | P_Value | Benjamini |
| <input type="checkbox"/> | COG_ONTOLOGY          | <a href="#">Cytoskeleton</a>                                                          | RT |     | 12    | 3.3E-2  | 2.8E-1    |
| <input type="checkbox"/> | INTERPRO              | <a href="#">ATPase associated with various cellular activities, AAA-5</a>             | RT |     | 5     | 6.3E-2  | 9.2E-1    |
| <input type="checkbox"/> | INTERPRO              | <a href="#">Dynein heavy chain, N-terminal region 2</a>                               | RT |     | 7     | 6.8E-2  | 9.3E-1    |
| <input type="checkbox"/> | INTERPRO              | <a href="#">Dynein heavy chain, N-terminal region 1</a>                               | RT |     | 4     | 7.7E-2  | 9.4E-1    |
| <input type="checkbox"/> | SP_PIR_KEYWORDS       | <a href="#">coiled coil</a>                                                           | RT |     | 4     | 1.1E-1  | 3.8E-1    |
| <input type="checkbox"/> | INTERPRO              | <a href="#">Dynein heavy chain</a>                                                    | RT |     | 6     | 2.5E-1  | 1.0E0     |

| <input type="checkbox"/> | Annotation Cluster                       | Enrichment Score | Term                                                                              | RT | Bar | Count | P_Value | Benjamini |
|--------------------------|------------------------------------------|------------------|-----------------------------------------------------------------------------------|----|-----|-------|---------|-----------|
| <input type="checkbox"/> | GOTERM_CC_FAT<br>Annotation Cluster 17   | 0.89             | <a href="#">dynein complex</a>                                                    | RT |     | 6     | 7.9E-1  | 1.0E0     |
| <input type="checkbox"/> | GOTERM_BP_FAT                            |                  | <a href="#">translational elongation</a>                                          | RT |     | 6     | 1.0E-1  | 8.6E-1    |
| <input type="checkbox"/> | GOTERM_MF_FAT                            |                  | <a href="#">translation elongation factor activity</a>                            | RT |     | 6     | 1.2E-1  | 8.5E-1    |
| <input type="checkbox"/> | SP_PIR_KEYWORDS<br>Annotation Cluster 18 | 0.85             | <a href="#">elongation factor</a>                                                 | RT |     | 5     | 1.8E-1  | 5.0E-1    |
| <input type="checkbox"/> | GOTERM_MF_FAT                            |                  | <a href="#">electron carrier activity</a>                                         | RT |     | 13    | 7.8E-2  | 7.7E-1    |
| <input type="checkbox"/> | INTERPRO                                 |                  | <a href="#">4Fe-4S ferredoxin, iron-sulphur binding, conserved site</a>           | RT |     | 5     | 1.1E-1  | 9.8E-1    |
| <input type="checkbox"/> | GOTERM_MF_FAT                            |                  | <a href="#">4 iron, 4 sulfur cluster binding</a>                                  | RT |     | 6     | 1.2E-1  | 8.5E-1    |
| <input type="checkbox"/> | GOTERM_MF_FAT                            |                  | <a href="#">metal cluster binding</a>                                             | RT |     | 11    | 1.4E-1  | 8.6E-1    |
| <input type="checkbox"/> | GOTERM_MF_FAT                            |                  | <a href="#">iron-sulfur cluster binding</a>                                       | RT |     | 11    | 1.4E-1  | 8.6E-1    |
| <input type="checkbox"/> | INTERPRO                                 |                  | <a href="#">4Fe-4S ferredoxin, iron-sulphur binding, subgroup</a>                 | RT |     | 5     | 2.5E-1  | 1.0E0     |
| <input type="checkbox"/> | INTERPRO<br>Annotation Cluster 19        | 0.84             | <a href="#">4Fe-4S ferredoxin, iron-sulphur binding domain</a>                    | RT |     | 5     | 2.5E-1  | 1.0E0     |
| <input type="checkbox"/> | GOTERM_BP_FAT                            |                  | <a href="#">alcohol biosynthetic process</a>                                      | RT |     | 5     | 9.3E-2  | 8.5E-1    |
| <input type="checkbox"/> | GOTERM_BP_FAT                            |                  | <a href="#">cellular carbohydrate biosynthetic process</a>                        | RT |     | 6     | 1.0E-1  | 8.6E-1    |
| <input type="checkbox"/> | GOTERM_BP_FAT                            |                  | <a href="#">carbohydrate biosynthetic process</a>                                 | RT |     | 6     | 1.0E-1  | 8.6E-1    |
| <input type="checkbox"/> | GOTERM_BP_FAT                            |                  | <a href="#">pyruvate metabolic process</a>                                        | RT |     | 4     | 1.9E-1  | 9.6E-1    |
| <input type="checkbox"/> | GOTERM_BP_FAT                            |                  | <a href="#">monosaccharide biosynthetic process</a>                               | RT |     | 4     | 1.9E-1  | 9.6E-1    |
| <input type="checkbox"/> | GOTERM_BP_FAT                            |                  | <a href="#">gluconeogenesis</a>                                                   | RT |     | 4     | 1.9E-1  | 9.6E-1    |
| <input type="checkbox"/> | GOTERM_BP_FAT<br>Annotation Cluster 20   | 0.78             | <a href="#">hexose biosynthetic process</a>                                       | RT |     | 4     | 1.9E-1  | 9.6E-1    |
| <input type="checkbox"/> | SMART                                    |                  | <a href="#">RAB</a>                                                               | RT |     | 4     | 3.7E-2  | 5.8E-1    |
| <input type="checkbox"/> | INTERPRO                                 |                  | <a href="#">Small GTP-binding protein</a>                                         | RT |     | 11    | 3.8E-2  | 8.2E-1    |
| <input type="checkbox"/> | INTERPRO                                 |                  | <a href="#">Ras small GTPase, Rab type</a>                                        | RT |     | 4     | 7.7E-2  | 9.4E-1    |
| <input type="checkbox"/> | INTERPRO                                 |                  | <a href="#">Ras</a>                                                               | RT |     | 7     | 1.0E-1  | 9.7E-1    |
| <input type="checkbox"/> | GOTERM_BP_FAT                            |                  | <a href="#">small GTPase mediated signal transduction</a>                         | RT |     | 9     | 3.1E-1  | 9.9E-1    |
| <input type="checkbox"/> | INTERPRO                                 |                  | <a href="#">Ras GTPase</a>                                                        | RT |     | 6     | 3.2E-1  | 1.0E0     |
| <input type="checkbox"/> | GOTERM_BP_FAT                            |                  | <a href="#">intracellular signaling cascade</a>                                   | RT |     | 9     | 6.8E-1  | 1.0E0     |
| <input type="checkbox"/> | PIR_SUPERFAMILY<br>Annotation Cluster 21 | 0.75             | PIRSF001710:Ras-related protein Rab                                               | RT |     | 4     | 7.5E-1  | 1.0E0     |
| <input type="checkbox"/> | INTERPRO                                 |                  | <a href="#">FAD-dependent pyridine nucleotide-disulphide oxidoreductase</a>       | RT |     | 4     | 7.7E-2  | 9.4E-1    |
| <input type="checkbox"/> | INTERPRO                                 |                  | <a href="#">Pyridine nucleotide-disulphide oxidoreductase, NAD-binding region</a> | RT |     | 3     | 2.0E-1  | 1.0E0     |
| <input type="checkbox"/> | GOTERM_MF_FAT<br>Annotation Cluster 22   | 0.7              | <a href="#">FAD binding</a>                                                       | RT |     | 4     | 3.7E-1  | 9.9E-1    |
| <input type="checkbox"/> | SMART                                    |                  | <a href="#">DnaJ</a>                                                              | RT |     | 5     | 8.0E-2  | 7.2E-1    |
| <input type="checkbox"/> | INTERPRO                                 |                  | <a href="#">Molecular chaperone, heat shock protein, Hsp40, DnaJ</a>              | RT |     | 5     | 1.1E-1  | 9.8E-1    |
| <input type="checkbox"/> | INTERPRO                                 |                  | <a href="#">Heat shock protein DnaJ, N-terminal</a>                               | RT |     | 5     | 1.8E-1  | 1.0E0     |
| <input type="checkbox"/> | INTERPRO                                 |                  | <a href="#">Chaperone DnaJ, C-terminal</a>                                        | RT |     | 3     | 2.0E-1  | 1.0E0     |
| <input type="checkbox"/> | INTERPRO                                 |                  | <a href="#">Heat shock protein DnaJ</a>                                           | RT |     | 3     | 2.0E-1  | 1.0E0     |
| <input type="checkbox"/> | GOTERM_MF_FAT                            |                  | <a href="#">heat shock protein binding</a>                                        | RT |     | 5     | 3.1E-1  | 9.7E-1    |
| <input type="checkbox"/> | PIR_SUPERFAMILY<br>Annotation Cluster 23 | 0.63             | PIRSF002585:heat shock protein DnaJ                                               | RT |     | 3     | 5.8E-1  | 1.0E0     |
| <input type="checkbox"/> | SMART                                    |                  | <a href="#">S_TKc</a>                                                             | RT |     | 28    | 2.8E-5  | 2.5E-3    |
| <input type="checkbox"/> | SP_PIR_KEYWORDS                          |                  | <a href="#">nucleotide-binding</a>                                                | RT |     | 118   | 1.1E-4  | 1.8E-3    |
| <input type="checkbox"/> | INTERPRO                                 |                  | <a href="#">Serine/threonine protein kinase</a>                                   | RT |     | 28    | 3.3E-3  | 2.2E-1    |
| <input type="checkbox"/> | SP_PIR_KEYWORDS                          |                  | <a href="#">atp-binding</a>                                                       | RT |     | 102   | 1.7E-2  | 1.3E-1    |
| <input type="checkbox"/> | INTERPRO                                 |                  | <a href="#">Protein kinase, ATP binding site</a>                                  | RT |     | 31    | 8.3E-2  | 9.5E-1    |
| <input type="checkbox"/> | SP_PIR_KEYWORDS                          |                  | <a href="#">serine/threonine-protein kinase</a>                                   | RT |     | 26    | 1.3E-1  | 4.2E-1    |
| <input type="checkbox"/> | INTERPRO                                 |                  | <a href="#">Serine/threonine protein kinase, active site</a>                      | RT |     | 30    | 2.6E-1  | 1.0E0     |
| <input type="checkbox"/> | GOTERM_MF_FAT                            |                  | <a href="#">protein serine/threonine kinase activity</a>                          | RT |     | 37    | 6.4E-1  | 1.0E0     |
| <input type="checkbox"/> | GOTERM_MF_FAT                            |                  | <a href="#">purine nucleotide binding</a>                                         | RT |     | 198   | 8.7E-1  | 1.0E0     |
| <input type="checkbox"/> | GOTERM_MF_FAT                            |                  | <a href="#">purine ribonucleotide binding</a>                                     | RT |     | 194   | 9.0E-1  | 1.0E0     |
| <input type="checkbox"/> | GOTERM_MF_FAT                            |                  | <a href="#">ribonucleotide binding</a>                                            | RT |     | 194   | 9.0E-1  | 1.0E0     |
| <input type="checkbox"/> | GOTERM_MF_FAT                            |                  | <a href="#">nucleotide binding</a>                                                | RT |     | 209   | 9.1E-1  | 1.0E0     |
| <input type="checkbox"/> | INTERPRO                                 |                  | <a href="#">Serine/threonine protein kinase-related</a>                           | RT |     | 60    | 9.1E-1  | 1.0E0     |
| <input type="checkbox"/> | GOTERM_MF_FAT                            |                  | <a href="#">purine nucleoside binding</a>                                         | RT |     | 174   | 9.7E-1  | 1.0E0     |

| <input type="checkbox"/> | Category        | Term                                                                                                           | RT | Bar | Count | P-Value | Benjamini |
|--------------------------|-----------------|----------------------------------------------------------------------------------------------------------------|----|-----|-------|---------|-----------|
| <input type="checkbox"/> | GOTERM_MF_FAT   | <a href="#">adenyl nucleotide binding</a>                                                                      | RT |     | 174   | 9.7E-1  | 1.0E0     |
| <input type="checkbox"/> | INTERPRO        | <a href="#">Protein kinase_core</a>                                                                            | RT |     | 65    | 9.7E-1  | 1.0E0     |
| <input type="checkbox"/> | GOTERM_MF_FAT   | <a href="#">nucleoside binding</a>                                                                             | RT |     | 175   | 9.8E-1  | 1.0E0     |
| <input type="checkbox"/> | GOTERM_MF_FAT   | <a href="#">adenyl ribonucleotide binding</a>                                                                  | RT |     | 170   | 9.8E-1  | 1.0E0     |
| <input type="checkbox"/> | GOTERM_MF_FAT   | <a href="#">ATP binding</a>                                                                                    | RT |     | 170   | 9.8E-1  | 1.0E0     |
| <input type="checkbox"/> | SP_PIR_KEYWORDS | <a href="#">kinase</a>                                                                                         | RT |     | 90    | 1.0E0   | 1.0E0     |
| <input type="checkbox"/> | GOTERM_MF_FAT   | <a href="#">protein kinase activity</a>                                                                        | RT |     | 66    | 1.0E0   | 1.0E0     |
| <input type="checkbox"/> | GOTERM_BP_FAT   | <a href="#">phosphorylation</a>                                                                                | RT |     | 74    | 1.0E0   | 1.0E0     |
| <input type="checkbox"/> | GOTERM_BP_FAT   | <a href="#">phosphate metabolic process</a>                                                                    | RT |     | 78    | 1.0E0   | 1.0E0     |
| <input type="checkbox"/> | GOTERM_BP_FAT   | <a href="#">phosphorus metabolic process</a>                                                                   | RT |     | 78    | 1.0E0   | 1.0E0     |
| <input type="checkbox"/> | GOTERM_BP_FAT   | <a href="#">protein amino acid phosphorylation</a>                                                             | RT |     | 65    | 1.0E0   | 1.0E0     |
| Annotation Cluster 24    |                 | Enrichment Score: 0.6                                                                                          |    |     | Count | P-Value | Benjamini |
| <input type="checkbox"/> | GOTERM_MF_FAT   | <a href="#">intramolecular transferase activity, phosphotransferases</a>                                       | RT |     | 4     | 1.3E-1  | 8.6E-1    |
| <input type="checkbox"/> | INTERPRO        | <a href="#">Alpha-D-phosphohexomutase, alpha/beta/alpha domain I</a>                                           | RT |     | 3     | 2.0E-1  | 1.0E0     |
| <input type="checkbox"/> | GOTERM_MF_FAT   | <a href="#">intramolecular transferase activity</a>                                                            | RT |     | 5     | 6.0E-1  | 1.0E0     |
| Annotation Cluster 25    |                 | Enrichment Score: 0.5                                                                                          |    |     | Count | P-Value | Benjamini |
| <input type="checkbox"/> | GOTERM_BP_FAT   | <a href="#">establishment of protein localization</a>                                                          | RT |     | 19    | 7.4E-2  | 8.1E-1    |
| <input type="checkbox"/> | GOTERM_BP_FAT   | <a href="#">protein transport</a>                                                                              | RT |     | 19    | 7.4E-2  | 8.1E-1    |
| <input type="checkbox"/> | GOTERM_BP_FAT   | <a href="#">vesicle-mediated transport</a>                                                                     | RT |     | 17    | 8.1E-2  | 8.2E-1    |
| <input type="checkbox"/> | GOTERM_BP_FAT   | <a href="#">protein localization</a>                                                                           | RT |     | 19    | 1.0E-1  | 8.6E-1    |
| <input type="checkbox"/> | GOTERM_BP_FAT   | <a href="#">cellular protein localization</a>                                                                  | RT |     | 11    | 4.8E-1  | 1.0E0     |
| <input type="checkbox"/> | GOTERM_BP_FAT   | <a href="#">cellular macromolecule localization</a>                                                            | RT |     | 11    | 4.8E-1  | 1.0E0     |
| <input type="checkbox"/> | GOTERM_BP_FAT   | <a href="#">intracellular protein transport</a>                                                                | RT |     | 11    | 4.8E-1  | 1.0E0     |
| <input type="checkbox"/> | GOTERM_BP_FAT   | <a href="#">intracellular transport</a>                                                                        | RT |     | 13    | 4.8E-1  | 1.0E0     |
| <input type="checkbox"/> | GOTERM_CC_FAT   | <a href="#">coated membrane</a>                                                                                | RT |     | 7     | 7.7E-1  | 1.0E0     |
| <input type="checkbox"/> | GOTERM_CC_FAT   | <a href="#">membrane coat</a>                                                                                  | RT |     | 7     | 7.7E-1  | 1.0E0     |
| <input type="checkbox"/> | GOTERM_CC_FAT   | <a href="#">Golgi apparatus</a>                                                                                | RT |     | 5     | 8.8E-1  | 1.0E0     |
| <input type="checkbox"/> | GOTERM_CC_FAT   | <a href="#">endomembrane system</a>                                                                            | RT |     | 6     | 9.6E-1  | 1.0E0     |
| Annotation Cluster 26    |                 | Enrichment Score: 0.48                                                                                         |    |     | Count | P-Value | Benjamini |
| <input type="checkbox"/> | GOTERM_BP_FAT   | <a href="#">generation of precursor metabolites and energy</a>                                                 | RT |     | 19    | 2.9E-3  | 1.2E-1    |
| <input type="checkbox"/> | GOTERM_MF_FAT   | <a href="#">cation-transporting ATPase activity</a>                                                            | RT |     | 7     | 1.0E-1  | 8.5E-1    |
| <input type="checkbox"/> | GOTERM_MF_FAT   | <a href="#">proton-transporting ATPase activity, rotational mechanism</a>                                      | RT |     | 5     | 2.1E-1  | 9.5E-1    |
| <input type="checkbox"/> | GOTERM_BP_FAT   | <a href="#">nucleobase, nucleoside and nucleotide biosynthetic process</a>                                     | RT |     | 21    | 2.2E-1  | 9.8E-1    |
| <input type="checkbox"/> | GOTERM_BP_FAT   | <a href="#">nucleobase, nucleoside, nucleotide and nucleic acid biosynthetic process</a>                       | RT |     | 21    | 2.2E-1  | 9.8E-1    |
| <input type="checkbox"/> | GOTERM_BP_FAT   | <a href="#">nitrogen compound biosynthetic process</a>                                                         | RT |     | 24    | 2.3E-1  | 9.7E-1    |
| <input type="checkbox"/> | GOTERM_BP_FAT   | <a href="#">hydrogen transport</a>                                                                             | RT |     | 9     | 2.3E-1  | 9.7E-1    |
| <input type="checkbox"/> | GOTERM_BP_FAT   | <a href="#">proton transport</a>                                                                               | RT |     | 9     | 2.3E-1  | 9.7E-1    |
| <input type="checkbox"/> | GOTERM_BP_FAT   | <a href="#">oxidative phosphorylation</a>                                                                      | RT |     | 8     | 2.5E-1  | 9.8E-1    |
| <input type="checkbox"/> | GOTERM_BP_FAT   | <a href="#">ATP synthesis coupled proton transport</a>                                                         | RT |     | 8     | 2.5E-1  | 9.8E-1    |
| <input type="checkbox"/> | GOTERM_BP_FAT   | <a href="#">energy coupled proton transport, down electrochemical gradient</a>                                 | RT |     | 8     | 2.5E-1  | 9.8E-1    |
| <input type="checkbox"/> | GOTERM_MF_FAT   | <a href="#">hydrolase activity, acting on acid anhydrides, catalyzing transmembrane movement of substances</a> | RT |     | 14    | 2.5E-1  | 9.6E-1    |
| <input type="checkbox"/> | GOTERM_BP_FAT   | <a href="#">purine nucleotide biosynthetic process</a>                                                         | RT |     | 15    | 2.6E-1  | 9.8E-1    |
| <input type="checkbox"/> | GOTERM_MF_FAT   | <a href="#">ATPase activity, coupled to transmembrane movement of ions</a>                                     | RT |     | 10    | 2.6E-1  | 9.7E-1    |
| <input type="checkbox"/> | GOTERM_MF_FAT   | <a href="#">monovalent inorganic cation transmembrane transporter activity</a>                                 | RT |     | 8     | 2.7E-1  | 9.6E-1    |
| <input type="checkbox"/> | GOTERM_MF_FAT   | <a href="#">hydrogen ion transmembrane transporter activity</a>                                                | RT |     | 8     | 2.7E-1  | 9.6E-1    |
| <input type="checkbox"/> | GOTERM_BP_FAT   | <a href="#">nucleoside triphosphate metabolic process</a>                                                      | RT |     | 14    | 2.8E-1  | 9.8E-1    |
| <input type="checkbox"/> | GOTERM_BP_FAT   | <a href="#">nucleoside triphosphate biosynthetic process</a>                                                   | RT |     | 14    | 2.8E-1  | 9.8E-1    |
| <input type="checkbox"/> | GOTERM_BP_FAT   | <a href="#">purine nucleoside triphosphate metabolic process</a>                                               | RT |     | 14    | 2.8E-1  | 9.8E-1    |
| <input type="checkbox"/> | GOTERM_BP_FAT   | <a href="#">purine nucleoside triphosphate biosynthetic process</a>                                            | RT |     | 14    | 2.8E-1  | 9.8E-1    |
| <input type="checkbox"/> | GOTERM_BP_FAT   | <a href="#">ribonucleoside triphosphate biosynthetic process</a>                                               | RT |     | 14    | 2.8E-1  | 9.8E-1    |
| <input type="checkbox"/> | GOTERM_BP_FAT   | <a href="#">purine ribonucleoside triphosphate metabolic process</a>                                           | RT |     | 14    | 2.8E-1  | 9.8E-1    |
| <input type="checkbox"/> | GOTERM_BP_FAT   | <a href="#">purine ribonucleoside triphosphate biosynthetic process</a>                                        | RT |     | 14    | 2.8E-1  | 9.8E-1    |
| <input type="checkbox"/> | GOTERM_BP_FAT   | <a href="#">ribonucleoside triphosphate metabolic process</a>                                                  | RT |     | 14    | 2.8E-1  | 9.8E-1    |

|                          |                       |                                                                                                       |    |  |       |         |           |
|--------------------------|-----------------------|-------------------------------------------------------------------------------------------------------|----|--|-------|---------|-----------|
| <input type="checkbox"/> | GOTERM_MF_FAT         | <a href="#">inorganic cation transmembrane transporter activity</a>                                   | RT |  | 9     | 3.0E-1  | 9.7E-1    |
| <input type="checkbox"/> | GOTERM_BP_FAT         | <a href="#">monovalent inorganic cation transport</a>                                                 | RT |  | 9     | 3.1E-1  | 9.9E-1    |
| <input type="checkbox"/> | GOTERM_BP_FAT         | <a href="#">purine nucleotide metabolic process</a>                                                   | RT |  | 15    | 3.1E-1  | 9.9E-1    |
| <input type="checkbox"/> | INTERPRO              | <a href="#">Haloacid dehalogenase-like hydrolase</a>                                                  | RT |  | 5     | 3.3E-1  | 1.0E0     |
| <input type="checkbox"/> | GOTERM_BP_FAT         | <a href="#">ion transmembrane transport</a>                                                           | RT |  | 8     | 3.3E-1  | 9.9E-1    |
| <input type="checkbox"/> | GOTERM_BP_FAT         | <a href="#">ribonucleotide metabolic process</a>                                                      | RT |  | 14    | 3.3E-1  | 9.9E-1    |
| <input type="checkbox"/> | GOTERM_BP_FAT         | <a href="#">purine ribonucleotide metabolic process</a>                                               | RT |  | 14    | 3.3E-1  | 9.9E-1    |
| <input type="checkbox"/> | GOTERM_BP_FAT         | <a href="#">purine ribonucleotide biosynthetic process</a>                                            | RT |  | 14    | 3.3E-1  | 9.9E-1    |
| <input type="checkbox"/> | GOTERM_BP_FAT         | <a href="#">ribonucleotide biosynthetic process</a>                                                   | RT |  | 14    | 3.3E-1  | 9.9E-1    |
| <input type="checkbox"/> | GOTERM_CC_FAT         | <a href="#">proton-transporting two-sector ATPase complex, catalytic domain</a>                       | RT |  | 6     | 3.4E-1  | 9.9E-1    |
| <input type="checkbox"/> | GOTERM_MF_FAT         | <a href="#">primary active transmembrane transporter activity</a>                                     | RT |  | 13    | 3.8E-1  | 9.9E-1    |
| <input type="checkbox"/> | GOTERM_MF_FAT         | <a href="#">P-P-bond-hydrolysis-driven transmembrane transporter activity</a>                         | RT |  | 13    | 3.8E-1  | 9.9E-1    |
| <input type="checkbox"/> | GOTERM_MF_FAT         | <a href="#">ATPase activity, coupled to transmembrane movement of substances</a>                      | RT |  | 12    | 4.2E-1  | 9.9E-1    |
| <input type="checkbox"/> | GOTERM_MF_FAT         | <a href="#">ATPase activity, coupled to movement of substances</a>                                    | RT |  | 12    | 4.2E-1  | 9.9E-1    |
| <input type="checkbox"/> | GOTERM_BP_FAT         | <a href="#">nucleotide biosynthetic process</a>                                                       | RT |  | 18    | 4.2E-1  | 1.0E0     |
| <input type="checkbox"/> | GOTERM_BP_FAT         | <a href="#">ATP metabolic process</a>                                                                 | RT |  | 12    | 4.5E-1  | 1.0E0     |
| <input type="checkbox"/> | GOTERM_BP_FAT         | <a href="#">ATP biosynthetic process</a>                                                              | RT |  | 12    | 4.5E-1  | 1.0E0     |
| <input type="checkbox"/> | GOTERM_CC_FAT         | <a href="#">proton-transporting two-sector ATPase complex</a>                                         | RT |  | 9     | 4.7E-1  | 1.0E0     |
| <input type="checkbox"/> | KEGG_PATHWAY          | <a href="#">Oxidative phosphorylation</a>                                                             | RT |  | 9     | 5.3E-1  | 9.8E-1    |
| <input type="checkbox"/> | SP_PIR_KEYWORDS       | <a href="#">ion transport</a>                                                                         | RT |  | 3     | 5.4E-1  | 8.9E-1    |
| <input type="checkbox"/> | GOTERM_BP_FAT         | <a href="#">cation transport</a>                                                                      | RT |  | 11    | 5.4E-1  | 1.0E0     |
| <input type="checkbox"/> | GOTERM_BP_FAT         | <a href="#">ion transport</a>                                                                         | RT |  | 11    | 5.4E-1  | 1.0E0     |
| <input type="checkbox"/> | INTERPRO              | <a href="#">ATPase, P-type, ATPase-associated region</a>                                              | RT |  | 4     | 6.6E-1  | 1.0E0     |
| <input type="checkbox"/> | GOTERM_BP_FAT         | <a href="#">transmembrane transport</a>                                                               | RT |  | 9     | 6.8E-1  | 1.0E0     |
| <input type="checkbox"/> | INTERPRO              | <a href="#">ATPase, P-type, K/Mg/Cd/Cu/Zn/Na/Ca/Na/H-transporter</a>                                  | RT |  | 4     | 7.2E-1  | 1.0E0     |
| <input type="checkbox"/> | INTERPRO              | <a href="#">ATPase, P-type phosphorylation site</a>                                                   | RT |  | 3     | 7.3E-1  | 1.0E0     |
| <input type="checkbox"/> | GOTERM_MF_FAT         | <a href="#">ATPase activity</a>                                                                       | RT |  | 32    | 7.6E-1  | 1.0E0     |
| <input type="checkbox"/> | GOTERM_MF_FAT         | <a href="#">ATPase activity, coupled to transmembrane movement of ions, phosphorylative mechanism</a> | RT |  | 4     | 8.6E-1  | 1.0E0     |
| <input type="checkbox"/> | GOTERM_CC_FAT         | <a href="#">proton-transporting V-type ATPase complex</a>                                             | RT |  | 4     | 9.0E-1  | 1.0E0     |
| <input type="checkbox"/> | SP_PIR_KEYWORDS       | <a href="#">transmembrane</a>                                                                         | RT |  | 8     | 9.2E-1  | 1.0E0     |
| <input type="checkbox"/> | GOTERM_MF_FAT         | <a href="#">ATPase activity, coupled</a>                                                              | RT |  | 19    | 9.8E-1  | 1.0E0     |
|                          | Annotation Cluster 27 | Enrichment Score: 0.46                                                                                |    |  | Count | P_Value | Benjamini |
| <input type="checkbox"/> | SP_PIR_KEYWORDS       | <a href="#">Rotamase</a>                                                                              | RT |  | 5     | 2.6E-1  | 6.3E-1    |
| <input type="checkbox"/> | GOTERM_MF_FAT         | <a href="#">cis-trans isomerase activity</a>                                                          | RT |  | 5     | 3.1E-1  | 9.7E-1    |
| <input type="checkbox"/> | GOTERM_MF_FAT         | <a href="#">peptidyl-prolyl cis-trans isomerase activity</a>                                          | RT |  | 5     | 3.1E-1  | 9.7E-1    |
| <input type="checkbox"/> | INTERPRO              | <a href="#">Peptidyl-prolyl cis-trans isomerase, FKBP-type</a>                                        | RT |  | 3     | 5.6E-1  | 1.0E0     |
|                          | Annotation Cluster 28 | Enrichment Score: 0.45                                                                                |    |  | Count | P_Value | Benjamini |
| <input type="checkbox"/> | GOTERM_MF_FAT         | <a href="#">GTPase activity</a>                                                                       | RT |  | 9     | 2.3E-1  | 9.6E-1    |
| <input type="checkbox"/> | INTERPRO              | <a href="#">Protein synthesis factor, GTP-binding</a>                                                 | RT |  | 4     | 4.2E-1  | 1.0E0     |
| <input type="checkbox"/> | INTERPRO              | <a href="#">Translation elongation factor EFTu/EF1A, domain 2</a>                                     | RT |  | 3     | 4.5E-1  | 1.0E0     |
|                          | Annotation Cluster 29 | Enrichment Score: 0.42                                                                                |    |  | Count | P_Value | Benjamini |
| <input type="checkbox"/> | SMART                 | <a href="#">ARF</a>                                                                                   | RT |  | 3     | 2.2E-1  | 9.2E-1    |
| <input type="checkbox"/> | GOTERM_BP_FAT         | <a href="#">small GTPase mediated signal transduction</a>                                             | RT |  | 9     | 3.1E-1  | 9.9E-1    |
| <input type="checkbox"/> | INTERPRO              | <a href="#">ARF/SAR superfamily</a>                                                                   | RT |  | 4     | 3.3E-1  | 1.0E0     |
| <input type="checkbox"/> | INTERPRO              | <a href="#">ADP-ribosylation factor</a>                                                               | RT |  | 3     | 3.3E-1  | 1.0E0     |
| <input type="checkbox"/> | PIR_SUPERFAMILY       | PIRSF001711:ADP-ribosylation factor                                                                   | RT |  | 4     | 6.0E-1  | 1.0E0     |
| <input type="checkbox"/> | GOTERM_BP_FAT         | <a href="#">intracellular signaling cascade</a>                                                       | RT |  | 9     | 6.8E-1  | 1.0E0     |
|                          | Annotation Cluster 30 | Enrichment Score: 0.35                                                                                |    |  | Count | P_Value | Benjamini |
| <input type="checkbox"/> | SMART                 | <a href="#">PP2Ac</a>                                                                                 | RT |  | 7     | 9.6E-2  | 7.3E-1    |
| <input type="checkbox"/> | INTERPRO              | <a href="#">Serine/threonine-specific protein phosphatase and bis(5-nucleosyl)-tetraphosphatase</a>   | RT |  | 7     | 2.5E-1  | 1.0E0     |
| <input type="checkbox"/> | SP_PIR_KEYWORDS       | <a href="#">iron</a>                                                                                  | RT |  | 8     | 5.3E-1  | 8.9E-1    |
| <input type="checkbox"/> | GOTERM_MF_FAT         | <a href="#">iron ion binding</a>                                                                      | RT |  | 12    | 5.8E-1  | 1.0E0     |
| <input type="checkbox"/> | INTERPRO              | <a href="#">Metallophosphoesterase</a>                                                                | RT |  | 7     | 6.0E-1  | 1.0E0     |
| <input type="checkbox"/> | GOTERM_MF_FAT         | <a href="#">phosphatase activity</a>                                                                  | RT |  | 16    | 6.5E-1  | 1.0E0     |

| <input type="checkbox"/> | Category              | Term                                                                     | RT | Count | P_Value | Benjamini |
|--------------------------|-----------------------|--------------------------------------------------------------------------|----|-------|---------|-----------|
| <input type="checkbox"/> |                       | <a href="#">phosphoprotein phosphatase activity</a>                      | RT | 10    | 7.2E-1  | 1.0E0     |
| <input type="checkbox"/> | PIR_SUPERFAMILY       | PIRSF000908: serine/threonine-protein phosphatase, conventional type     | RT | 5     | 7.5E-1  | 1.0E0     |
|                          | Annotation Cluster 31 | Enrichment Score: 0.35                                                   |    |       | Count   | P_Value   |
| <input type="checkbox"/> |                       | <a href="#">ribonucleoside metabolic process</a>                         | RT | 5     | 3.0E-1  | 9.9E-1    |
| <input type="checkbox"/> |                       | <a href="#">pyrimidine nucleoside metabolic process</a>                  | RT | 3     | 3.6E-1  | 9.9E-1    |
| <input type="checkbox"/> |                       | <a href="#">pyrimidine ribonucleoside metabolic process</a>              | RT | 3     | 3.6E-1  | 9.9E-1    |
| <input type="checkbox"/> | KEGG_PATHWAY          | <a href="#">Pyrimidine metabolism</a>                                    | RT | 7     | 1.0E0   | 1.0E0     |
|                          | Annotation Cluster 32 | Enrichment Score: 0.34                                                   |    |       | Count   | P_Value   |
| <input type="checkbox"/> | INTERPRO              | <a href="#">ABC transporter-like</a>                                     | RT | 10    | 2.0E-1  | 1.0E0     |
| <input type="checkbox"/> | INTERPRO              | <a href="#">ABC transporter, conserved site</a>                          | RT | 7     | 6.5E-1  | 1.0E0     |
| <input type="checkbox"/> | COG_ONTOLOGY          | <a href="#">Defense mechanisms</a>                                       | RT | 7     | 7.4E-1  | 9.3E-1    |
|                          | Annotation Cluster 33 | Enrichment Score: 0.28                                                   |    |       | Count   | P_Value   |
| <input type="checkbox"/> | SMART                 | <a href="#">Kelch</a>                                                    | RT | 3     | 4.0E-1  | 9.9E-1    |
| <input type="checkbox"/> | INTERPRO              | <a href="#">Kelch repeat type 1</a>                                      | RT | 3     | 5.6E-1  | 1.0E0     |
| <input type="checkbox"/> | INTERPRO              | <a href="#">Kelch-type beta propeller</a>                                | RT | 3     | 6.5E-1  | 1.0E0     |
|                          | Annotation Cluster 34 | Enrichment Score: 0.25                                                   |    |       | Count   | P_Value   |
| <input type="checkbox"/> | SMART                 | <a href="#">TPR</a>                                                      | RT | 8     | 2.8E-1  | 9.5E-1    |
| <input type="checkbox"/> | INTERPRO              | <a href="#">Tetratricopeptide-like helical</a>                           | RT | 10    | 5.7E-1  | 1.0E0     |
| <input type="checkbox"/> | INTERPRO              | <a href="#">Tetratricopeptide repeat</a>                                 | RT | 8     | 5.7E-1  | 1.0E0     |
| <input type="checkbox"/> | SP_PIR_KEYWORDS       | <a href="#">tpr repeat</a>                                               | RT | 4     | 6.3E-1  | 9.3E-1    |
| <input type="checkbox"/> | INTERPRO              | <a href="#">Tetratricopeptide TPR-1</a>                                  | RT | 6     | 7.3E-1  | 1.0E0     |
| <input type="checkbox"/> | INTERPRO              | <a href="#">Tetratricopeptide region</a>                                 | RT | 7     | 7.4E-1  | 1.0E0     |
|                          | Annotation Cluster 35 | Enrichment Score: 0.22                                                   |    |       | Count   | P_Value   |
| <input type="checkbox"/> | GOTERM_MF_FAT         | <a href="#">nucleobase, nucleoside, nucleotide kinase activity</a>       | RT | 6     | 2.7E-1  | 9.7E-1    |
| <input type="checkbox"/> | GOTERM_MF_FAT         | <a href="#">phosphotransferase activity, phosphate group as acceptor</a> | RT | 4     | 4.9E-1  | 1.0E0     |
| <input type="checkbox"/> | KEGG_PATHWAY          | <a href="#">Pyrimidine metabolism</a>                                    | RT | 7     | 1.0E0   | 1.0E0     |
| <input type="checkbox"/> | KEGG_PATHWAY          | <a href="#">Purine metabolism</a>                                        | RT | 6     | 1.0E0   | 1.0E0     |
|                          | Annotation Cluster 36 | Enrichment Score: 0.19                                                   |    |       | Count   | P_Value   |
| <input type="checkbox"/> | GOTERM_BP_FAT         | <a href="#">pyridine nucleotide metabolic process</a>                    | RT | 4     | 4.7E-1  | 1.0E0     |
| <input type="checkbox"/> | GOTERM_BP_FAT         | <a href="#">oxidoreduction coenzyme metabolic process</a>                | RT | 4     | 4.7E-1  | 1.0E0     |
| <input type="checkbox"/> | GOTERM_BP_FAT         | <a href="#">nicotinamide metabolic process</a>                           | RT | 3     | 6.8E-1  | 1.0E0     |
| <input type="checkbox"/> | GOTERM_BP_FAT         | <a href="#">secondary metabolic process</a>                              | RT | 3     | 6.8E-1  | 1.0E0     |
| <input type="checkbox"/> | GOTERM_BP_FAT         | <a href="#">nicotinamide nucleotide metabolic process</a>                | RT | 3     | 6.8E-1  | 1.0E0     |
| <input type="checkbox"/> | GOTERM_BP_FAT         | <a href="#">alkaloid metabolic process</a>                               | RT | 3     | 6.8E-1  | 1.0E0     |
| <input type="checkbox"/> | GOTERM_BP_FAT         | <a href="#">cellular amide metabolic process</a>                         | RT | 3     | 6.8E-1  | 1.0E0     |
| <input type="checkbox"/> | GOTERM_BP_FAT         | <a href="#">cofactor metabolic process</a>                               | RT | 5     | 7.9E-1  | 1.0E0     |
| <input type="checkbox"/> | GOTERM_BP_FAT         | <a href="#">coenzyme metabolic process</a>                               | RT | 4     | 8.5E-1  | 1.0E0     |
|                          | Annotation Cluster 37 | Enrichment Score: 0.16                                                   |    |       | Count   | P_Value   |
| <input type="checkbox"/> | SP_PIR_KEYWORDS       | <a href="#">Acyltransferase</a>                                          | RT | 5     | 5.3E-1  | 8.9E-1    |
| <input type="checkbox"/> | GOTERM_MF_FAT         | <a href="#">N-acyltransferase activity</a>                               | RT | 4     | 7.6E-1  | 1.0E0     |
| <input type="checkbox"/> | INTERPRO              | <a href="#">Acyl-CoA N-acyltransferase</a>                               | RT | 3     | 8.4E-1  | 1.0E0     |
|                          | Annotation Cluster 38 | Enrichment Score: 0.14                                                   |    |       | Count   | P_Value   |
| <input type="checkbox"/> | SMART                 | <a href="#">EFh</a>                                                      | RT | 4     | 4.6E-1  | 9.9E-1    |
| <input type="checkbox"/> | INTERPRO              | <a href="#">Calcium-binding EF-hand</a>                                  | RT | 4     | 6.6E-1  | 1.0E0     |
| <input type="checkbox"/> | INTERPRO              | <a href="#">EF hand</a>                                                  | RT | 4     | 6.6E-1  | 1.0E0     |
| <input type="checkbox"/> | INTERPRO              | <a href="#">EF-HAND 1</a>                                                | RT | 6     | 7.3E-1  | 1.0E0     |
| <input type="checkbox"/> | INTERPRO              | <a href="#">EF-Hand type</a>                                             | RT | 5     | 8.1E-1  | 1.0E0     |
| <input type="checkbox"/> | INTERPRO              | <a href="#">EF-HAND 2</a>                                                | RT | 4     | 9.1E-1  | 1.0E0     |
| <input type="checkbox"/> | SP_PIR_KEYWORDS       | <a href="#">calcium</a>                                                  | RT | 4     | 9.2E-1  | 1.0E0     |
|                          | Annotation Cluster 39 | Enrichment Score: 0.12                                                   |    |       | Count   | P_Value   |
| <input type="checkbox"/> | GOTERM_MF_FAT         | <a href="#">GTPase activity</a>                                          | RT | 9     | 2.3E-1  | 9.6E-1    |
| <input type="checkbox"/> | INTERPRO              | <a href="#">Tubulin/FtsZ, 2-layer sandwich domain</a>                    | RT | 3     | 6.5E-1  | 1.0E0     |
| <input type="checkbox"/> | INTERPRO              | <a href="#">Tubulin, conserved site</a>                                  | RT | 3     | 7.3E-1  | 1.0E0     |
| <input type="checkbox"/> | INTERPRO              | <a href="#">Tubulin</a>                                                  | RT | 3     | 7.3E-1  | 1.0E0     |
| <input type="checkbox"/> | INTERPRO              | <a href="#">Tubulin/FtsZ, GTPase domain</a>                              | RT | 3     | 7.3E-1  | 1.0E0     |
| <input type="checkbox"/> | SP_PIR_KEYWORDS       | <a href="#">microtubule</a>                                              | RT | 9     | 8.9E-1  | 9.9E-1    |
| <input type="checkbox"/> | GOTERM_BP_FAT         | <a href="#">cellular protein complex assembly</a>                        | RT | 4     | 8.9E-1  | 1.0E0     |
| <input type="checkbox"/> | GOTERM_BP_FAT         | <a href="#">protein polymerization</a>                                   | RT | 3     | 9.0E-1  | 1.0E0     |

| <input type="checkbox"/> | Term            | Description                                                                           | RT                     | Bar | Count | P-Value | Benjamini         |
|--------------------------|-----------------|---------------------------------------------------------------------------------------|------------------------|-----|-------|---------|-------------------|
| <input type="checkbox"/> | GOTERM_BP_FAT   | <a href="#">protein complex assembly</a>                                              | RT                     |     | 4     | 9.5E-1  | 1.0E0             |
| <input type="checkbox"/> | GOTERM_BP_FAT   | <a href="#">protein complex biogenesis</a>                                            | RT                     |     | 4     | 9.5E-1  | 1.0E0             |
| <input type="checkbox"/> | PIR_SUPERFAMILY | PIRSF002306: tubulin                                                                  | RT                     |     | 3     | 9.7E-1  | 1.0E0             |
| <input type="checkbox"/> | GOTERM_CC_FAT   | <a href="#">microtubule</a>                                                           | RT                     |     | 9     | 1.0E0   | 1.0E0             |
|                          |                 | Annotation Cluster 40                                                                 | Enrichment Score: 0.11 |     |       | Count   | P-Value Benjamini |
| <input type="checkbox"/> | GOTERM_BP_FAT   | <a href="#">nucleobase, nucleoside and nucleotide catabolic process</a>               | RT                     |     | 3     | 7.8E-1  | 1.0E0             |
| <input type="checkbox"/> | GOTERM_BP_FAT   | <a href="#">nucleobase, nucleoside, nucleotide and nucleic acid catabolic process</a> | RT                     |     | 3     | 7.8E-1  | 1.0E0             |
| <input type="checkbox"/> | GOTERM_BP_FAT   | <a href="#">nitrogen compound catabolic process</a>                                   | RT                     |     | 3     | 7.8E-1  | 1.0E0             |
|                          |                 | Annotation Cluster 41                                                                 | Enrichment Score: 0.09 |     |       | Count   | P-Value Benjamini |
| <input type="checkbox"/> | INTERPRO        | <a href="#">Dynein heavy chain</a>                                                    | RT                     |     | 6     | 2.5E-1  | 1.0E0             |
| <input type="checkbox"/> | INTERPRO        | <a href="#">Kinesin, motor region, conserved site</a>                                 | RT                     |     | 6     | 6.4E-1  | 1.0E0             |
| <input type="checkbox"/> | GOTERM_CC_FAT   | <a href="#">microtubule associated complex</a>                                        | RT                     |     | 8     | 6.7E-1  | 1.0E0             |
| <input type="checkbox"/> | SMART           | <a href="#">KISc</a>                                                                  | RT                     |     | 6     | 7.9E-1  | 1.0E0             |
| <input type="checkbox"/> | GOTERM_CC_FAT   | <a href="#">dynein complex</a>                                                        | RT                     |     | 6     | 7.9E-1  | 1.0E0             |
| <input type="checkbox"/> | GOTERM_MF_FAT   | <a href="#">microtubule motor activity</a>                                            | RT                     |     | 14    | 8.0E-1  | 1.0E0             |
| <input type="checkbox"/> | GOTERM_MF_FAT   | <a href="#">motor activity</a>                                                        | RT                     |     | 14    | 8.0E-1  | 1.0E0             |
| <input type="checkbox"/> | SP_PIR_KEYWORDS | <a href="#">microtubule</a>                                                           | RT                     |     | 9     | 8.9E-1  | 9.9E-1            |
| <input type="checkbox"/> | INTERPRO        | <a href="#">Kinesin, motor region</a>                                                 | RT                     |     | 6     | 9.4E-1  | 1.0E0             |
| <input type="checkbox"/> | SP_PIR_KEYWORDS | <a href="#">motor protein</a>                                                         | RT                     |     | 6     | 9.4E-1  | 1.0E0             |
| <input type="checkbox"/> | GOTERM_BP_FAT   | <a href="#">microtubule-based process</a>                                             | RT                     |     | 17    | 9.7E-1  | 1.0E0             |
| <input type="checkbox"/> | GOTERM_BP_FAT   | <a href="#">microtubule-based movement</a>                                            | RT                     |     | 14    | 9.8E-1  | 1.0E0             |
| <input type="checkbox"/> | GOTERM_CC_FAT   | <a href="#">cytoskeleton</a>                                                          | RT                     |     | 19    | 1.0E0   | 1.0E0             |
| <input type="checkbox"/> | GOTERM_CC_FAT   | <a href="#">microtubule cytoskeleton</a>                                              | RT                     |     | 17    | 1.0E0   | 1.0E0             |
| <input type="checkbox"/> | GOTERM_CC_FAT   | <a href="#">cytoskeletal part</a>                                                     | RT                     |     | 17    | 1.0E0   | 1.0E0             |
| <input type="checkbox"/> | GOTERM_CC_FAT   | <a href="#">microtubule</a>                                                           | RT                     |     | 9     | 1.0E0   | 1.0E0             |
|                          |                 | Annotation Cluster 42                                                                 | Enrichment Score: 0.08 |     |       | Count   | P-Value Benjamini |
| <input type="checkbox"/> | GOTERM_MF_FAT   | <a href="#">N-acyltransferase activity</a>                                            | RT                     |     | 4     | 7.6E-1  | 1.0E0             |
| <input type="checkbox"/> | INTERPRO        | <a href="#">GCN5-related N-acetyltransferase</a>                                      | RT                     |     | 3     | 7.9E-1  | 1.0E0             |
| <input type="checkbox"/> | GOTERM_MF_FAT   | <a href="#">N-acetyltransferase activity</a>                                          | RT                     |     | 3     | 8.9E-1  | 1.0E0             |
| <input type="checkbox"/> | GOTERM_MF_FAT   | <a href="#">acetyltransferase activity</a>                                            | RT                     |     | 3     | 9.2E-1  | 1.0E0             |
|                          |                 | Annotation Cluster 43                                                                 | Enrichment Score: 0.07 |     |       | Count   | P-Value Benjamini |
| <input type="checkbox"/> | INTERPRO        | <a href="#">Clathrin/coatomer adaptor, adaptin-like, N-terminal</a>                   | RT                     |     | 3     | 4.5E-1  | 1.0E0             |
| <input type="checkbox"/> | GOTERM_CC_FAT   | <a href="#">coated membrane</a>                                                       | RT                     |     | 7     | 7.7E-1  | 1.0E0             |
| <input type="checkbox"/> | GOTERM_CC_FAT   | <a href="#">membrane coat</a>                                                         | RT                     |     | 7     | 7.7E-1  | 1.0E0             |
| <input type="checkbox"/> | GOTERM_CC_FAT   | <a href="#">Golgi apparatus</a>                                                       | RT                     |     | 5     | 8.8E-1  | 1.0E0             |
| <input type="checkbox"/> | GOTERM_CC_FAT   | <a href="#">organelle membrane</a>                                                    | RT                     |     | 5     | 8.8E-1  | 1.0E0             |
| <input type="checkbox"/> | GOTERM_CC_FAT   | <a href="#">vesicle membrane</a>                                                      | RT                     |     | 3     | 8.8E-1  | 1.0E0             |
| <input type="checkbox"/> | GOTERM_CC_FAT   | <a href="#">cytoplasmic membrane-bounded vesicle</a>                                  | RT                     |     | 3     | 8.8E-1  | 1.0E0             |
| <input type="checkbox"/> | GOTERM_CC_FAT   | <a href="#">cytoplasmic vesicle part</a>                                              | RT                     |     | 3     | 8.8E-1  | 1.0E0             |
| <input type="checkbox"/> | GOTERM_CC_FAT   | <a href="#">vesicle</a>                                                               | RT                     |     | 3     | 8.8E-1  | 1.0E0             |
| <input type="checkbox"/> | GOTERM_CC_FAT   | <a href="#">membrane-bounded vesicle</a>                                              | RT                     |     | 3     | 8.8E-1  | 1.0E0             |
| <input type="checkbox"/> | GOTERM_CC_FAT   | <a href="#">cytoplasmic vesicle</a>                                                   | RT                     |     | 3     | 8.8E-1  | 1.0E0             |
| <input type="checkbox"/> | GOTERM_CC_FAT   | <a href="#">coated vesicle</a>                                                        | RT                     |     | 3     | 8.8E-1  | 1.0E0             |
| <input type="checkbox"/> | GOTERM_CC_FAT   | <a href="#">vesicle coat</a>                                                          | RT                     |     | 3     | 8.8E-1  | 1.0E0             |
| <input type="checkbox"/> | GOTERM_CC_FAT   | <a href="#">coated vesicle membrane</a>                                               | RT                     |     | 3     | 8.8E-1  | 1.0E0             |
| <input type="checkbox"/> | GOTERM_CC_FAT   | <a href="#">cytoplasmic vesicle membrane</a>                                          | RT                     |     | 3     | 8.8E-1  | 1.0E0             |
| <input type="checkbox"/> | GOTERM_CC_FAT   | <a href="#">endomembrane system</a>                                                   | RT                     |     | 6     | 9.6E-1  | 1.0E0             |
| <input type="checkbox"/> | GOTERM_CC_FAT   | <a href="#">Golgi apparatus part</a>                                                  | RT                     |     | 3     | 9.6E-1  | 1.0E0             |
|                          |                 | Annotation Cluster 44                                                                 | Enrichment Score: 0.07 |     |       | Count   | P-Value Benjamini |
| <input type="checkbox"/> | SP_PIR_KEYWORDS | <a href="#">membrane</a>                                                              | RT                     |     | 10    | 5.8E-1  | 9.1E-1            |
| <input type="checkbox"/> | SP_PIR_KEYWORDS | <a href="#">transmembrane</a>                                                         | RT                     |     | 8     | 9.2E-1  | 1.0E0             |
| <input type="checkbox"/> | GOTERM_CC_FAT   | <a href="#">intrinsic to membrane</a>                                                 | RT                     |     | 15    | 1.0E0   | 1.0E0             |
| <input type="checkbox"/> | GOTERM_CC_FAT   | <a href="#">integral to membrane</a>                                                  | RT                     |     | 15    | 1.0E0   | 1.0E0             |
|                          |                 | Annotation Cluster 45                                                                 | Enrichment Score: 0.06 |     |       | Count   | P-Value Benjamini |
| <input type="checkbox"/> | GOTERM_BP_FAT   | <a href="#">cellular macromolecular complex subunit organization</a>                  | RT                     |     | 11    | 6.1E-1  | 1.0E0             |
| <input type="checkbox"/> | INTERPRO        | <a href="#">Histone core</a>                                                          | RT                     |     | 4     | 6.6E-1  | 1.0E0             |
| <input type="checkbox"/> | GOTERM_BP_FAT   | <a href="#">cellular macromolecular complex assembly</a>                              | RT                     |     | 10    | 7.0E-1  | 1.0E0             |



| <input type="checkbox"/> | Annotation      | Term                                                             | RT | Count                  | P_Value | Benjamini |
|--------------------------|-----------------|------------------------------------------------------------------|----|------------------------|---------|-----------|
| <input type="checkbox"/> | GOTERM_BP_FAT   | <a href="#">macromolecular complex subunit organization</a>      | RT | 11                     | 7.2E-1  | 1.0E0     |
| <input type="checkbox"/> | SP_PIR_KEYWORDS | <a href="#">nucleosome core</a>                                  | RT | 3                      | 7.4E-1  | 9.7E-1    |
| <input type="checkbox"/> | SP_PIR_KEYWORDS | <a href="#">chromosomal protein</a>                              | RT | 4                      | 7.7E-1  | 9.7E-1    |
| <input type="checkbox"/> | GOTERM_BP_FAT   | <a href="#">macromolecular complex assembly</a>                  | RT | 10                     | 8.0E-1  | 1.0E0     |
| <input type="checkbox"/> | INTERPRO        | <a href="#">Histone-fold</a>                                     | RT | 4                      | 8.2E-1  | 1.0E0     |
| <input type="checkbox"/> | SP_PIR_KEYWORDS | <a href="#">nucleus</a>                                          | RT | 10                     | 8.6E-1  | 9.9E-1    |
| <input type="checkbox"/> | GOTERM_BP_FAT   | <a href="#">DNA packaging</a>                                    | RT | 4                      | 8.9E-1  | 1.0E0     |
| <input type="checkbox"/> | GOTERM_BP_FAT   | <a href="#">nucleosome assembly</a>                              | RT | 4                      | 8.9E-1  | 1.0E0     |
| <input type="checkbox"/> | GOTERM_BP_FAT   | <a href="#">protein-DNA complex assembly</a>                     | RT | 4                      | 8.9E-1  | 1.0E0     |
| <input type="checkbox"/> | GOTERM_BP_FAT   | <a href="#">chromatin assembly</a>                               | RT | 4                      | 8.9E-1  | 1.0E0     |
| <input type="checkbox"/> | GOTERM_BP_FAT   | <a href="#">nucleosome organization</a>                          | RT | 4                      | 8.9E-1  | 1.0E0     |
| <input type="checkbox"/> | GOTERM_BP_FAT   | <a href="#">chromatin assembly or disassembly</a>                | RT | 4                      | 9.5E-1  | 1.0E0     |
| <input type="checkbox"/> | GOTERM_CC_FAT   | <a href="#">nucleosome</a>                                       | RT | 4                      | 9.6E-1  | 1.0E0     |
| <input type="checkbox"/> | GOTERM_BP_FAT   | <a href="#">chromatin organization</a>                           | RT | 4                      | 9.8E-1  | 1.0E0     |
| <input type="checkbox"/> | GOTERM_CC_FAT   | <a href="#">chromatin</a>                                        | RT | 4                      | 9.8E-1  | 1.0E0     |
| <input type="checkbox"/> | GOTERM_CC_FAT   | <a href="#">protein-DNA complex</a>                              | RT | 4                      | 9.9E-1  | 1.0E0     |
| <input type="checkbox"/> | GOTERM_BP_FAT   | <a href="#">chromosome organization</a>                          | RT | 4                      | 1.0E0   | 1.0E0     |
| <input type="checkbox"/> | GOTERM_CC_FAT   | <a href="#">chromosomal part</a>                                 | RT | 4                      | 1.0E0   | 1.0E0     |
| <input type="checkbox"/> | SP_PIR_KEYWORDS | <a href="#">dna-binding</a>                                      | RT | 5                      | 1.0E0   | 1.0E0     |
| <input type="checkbox"/> | GOTERM_CC_FAT   | <a href="#">chromosome</a>                                       | RT | 4                      | 1.0E0   | 1.0E0     |
| <input type="checkbox"/> | GOTERM_MF_FAT   | <a href="#">DNA binding</a>                                      | RT | 7                      | 1.0E0   | 1.0E0     |
| Annotation Cluster 46    |                 |                                                                  |    | Enrichment Score: 0.06 |         |           |
| <input type="checkbox"/> | INTERPRO        | <a href="#">EGF</a>                                              | RT | 3                      | 6.5E-1  | 1.0E0     |
| <input type="checkbox"/> | SP_PIR_KEYWORDS | <a href="#">egf-like domain</a>                                  | RT | 6                      | 7.2E-1  | 9.6E-1    |
| <input type="checkbox"/> | INTERPRO        | <a href="#">EGF, extracellular</a>                               | RT | 6                      | 8.4E-1  | 1.0E0     |
| <input type="checkbox"/> | INTERPRO        | <a href="#">EGF-like, type 3</a>                                 | RT | 7                      | 9.4E-1  | 1.0E0     |
| <input type="checkbox"/> | INTERPRO        | <a href="#">EGF-like region, conserved site</a>                  | RT | 16                     | 1.0E0   | 1.0E0     |
| <input type="checkbox"/> | SMART           | <a href="#">EGF</a>                                              | RT | 20                     | 1.0E0   | 1.0E0     |
| <input type="checkbox"/> | INTERPRO        | <a href="#">EGF-like</a>                                         | RT | 20                     | 1.0E0   | 1.0E0     |
| Annotation Cluster 47    |                 |                                                                  |    | Enrichment Score: 0.06 |         |           |
| <input type="checkbox"/> | GOTERM_BP_FAT   | <a href="#">tRNA modification</a>                                | RT | 3                      | 5.4E-1  | 1.0E0     |
| <input type="checkbox"/> | GOTERM_BP_FAT   | <a href="#">RNA modification</a>                                 | RT | 5                      | 9.4E-1  | 1.0E0     |
| <input type="checkbox"/> | GOTERM_BP_FAT   | <a href="#">tRNA processing</a>                                  | RT | 4                      | 9.9E-1  | 1.0E0     |
| <input type="checkbox"/> | GOTERM_BP_FAT   | <a href="#">ncRNA processing</a>                                 | RT | 7                      | 9.9E-1  | 1.0E0     |
| <input type="checkbox"/> | GOTERM_BP_FAT   | <a href="#">RNA processing</a>                                   | RT | 12                     | 1.0E0   | 1.0E0     |
| Annotation Cluster 48    |                 |                                                                  |    | Enrichment Score: 0.05 |         |           |
| <input type="checkbox"/> | SMART           | <a href="#">Pept_C1</a>                                          | RT | 6                      | 7.6E-1  | 1.0E0     |
| <input type="checkbox"/> | INTERPRO        | <a href="#">Peptidase, cysteine peptidase active site</a>        | RT | 8                      | 8.1E-1  | 1.0E0     |
| <input type="checkbox"/> | INTERPRO        | <a href="#">Peptidase C1A, papain</a>                            | RT | 6                      | 9.3E-1  | 1.0E0     |
| <input type="checkbox"/> | INTERPRO        | <a href="#">Peptidase C1A, papain C-terminal</a>                 | RT | 6                      | 9.3E-1  | 1.0E0     |
| <input type="checkbox"/> | GOTERM_MF_FAT   | <a href="#">cysteine-type endopeptidase activity</a>             | RT | 6                      | 9.7E-1  | 1.0E0     |
| <input type="checkbox"/> | GOTERM_MF_FAT   | <a href="#">cysteine-type peptidase activity</a>                 | RT | 6                      | 9.9E-1  | 1.0E0     |
| Annotation Cluster 49    |                 |                                                                  |    | Enrichment Score: 0.03 |         |           |
| <input type="checkbox"/> | GOTERM_BP_FAT   | <a href="#">ribosome biogenesis</a>                              | RT | 7                      | 8.9E-1  | 1.0E0     |
| <input type="checkbox"/> | GOTERM_BP_FAT   | <a href="#">ribonucleoprotein complex biogenesis</a>             | RT | 7                      | 8.9E-1  | 1.0E0     |
| <input type="checkbox"/> | GOTERM_BP_FAT   | <a href="#">rRNA metabolic process</a>                           | RT | 3                      | 9.9E-1  | 1.0E0     |
| <input type="checkbox"/> | GOTERM_BP_FAT   | <a href="#">rRNA processing</a>                                  | RT | 3                      | 9.9E-1  | 1.0E0     |
| Annotation Cluster 50    |                 |                                                                  |    | Enrichment Score: 0.02 |         |           |
| <input type="checkbox"/> | INTERPRO        | <a href="#">RNA helicase, DEAD-box type, Q motif</a>             | RT | 5                      | 7.7E-1  | 1.0E0     |
| <input type="checkbox"/> | INTERPRO        | <a href="#">DNA/RNA helicase, DEAD/DEAH box type, N-terminal</a> | RT | 7                      | 9.1E-1  | 1.0E0     |
| <input type="checkbox"/> | SMART           | <a href="#">DEXDc</a>                                            | RT | 7                      | 9.4E-1  | 1.0E0     |
| <input type="checkbox"/> | SMART           | <a href="#">HELICc</a>                                           | RT | 7                      | 9.5E-1  | 1.0E0     |
| <input type="checkbox"/> | GOTERM_MF_FAT   | <a href="#">ATPase activity, coupled</a>                         | RT | 19                     | 9.8E-1  | 1.0E0     |
| <input type="checkbox"/> | INTERPRO        | <a href="#">DEAD-like helicase, N-terminal</a>                   | RT | 7                      | 9.9E-1  | 1.0E0     |
| <input type="checkbox"/> | INTERPRO        | <a href="#">Helicase, superfamily 1 and 2, ATP-binding</a>       | RT | 7                      | 9.9E-1  | 1.0E0     |
| <input type="checkbox"/> | INTERPRO        | <a href="#">DNA/RNA helicase, C-terminal</a>                     | RT | 7                      | 1.0E0   | 1.0E0     |
| <input type="checkbox"/> | GOTERM_MF_FAT   | <a href="#">purine NTP-dependent helicase activity</a>           | RT | 7                      | 1.0E0   | 1.0E0     |
|                          |                 | <a href="#">ATP-dependent helicase activity</a>                  | RT | 7                      | 1.0E0   | 1.0E0     |

|                          |                       |                                                          |    |  |  |  |       |         |           |
|--------------------------|-----------------------|----------------------------------------------------------|----|--|--|--|-------|---------|-----------|
| <input type="checkbox"/> | GOTERM_MF_FAT         |                                                          |    |  |  |  |       |         |           |
| <input type="checkbox"/> | SP_PIR_KEYWORDS       | <a href="#">helicase</a>                                 | RT |  |  |  | 7     | 1.0E0   | 1.0E0     |
| <input type="checkbox"/> | GOTERM_MF_FAT         | <a href="#">helicase activity</a>                        | RT |  |  |  | 9     | 1.0E0   | 1.0E0     |
|                          | Annotation Cluster 51 | Enrichment Score: 0.02                                   |    |  |  |  | Count | P_Value | Benjamini |
| <input type="checkbox"/> | INTERPRO              | <a href="#">WD40 repeat, conserved site</a>              | RT |  |  |  | 7     | 8.9E-1  | 1.0E0     |
| <input type="checkbox"/> | SMART                 | <a href="#">WD40</a>                                     | RT |  |  |  | 13    | 9.3E-1  | 1.0E0     |
| <input type="checkbox"/> | INTERPRO              | <a href="#">WD40 repeat 2</a>                            | RT |  |  |  | 9     | 9.6E-1  | 1.0E0     |
| <input type="checkbox"/> | INTERPRO              | <a href="#">WD40 repeat, region</a>                      | RT |  |  |  | 9     | 9.8E-1  | 1.0E0     |
| <input type="checkbox"/> | INTERPRO              | <a href="#">WD40 repeat, subgroup</a>                    | RT |  |  |  | 11    | 9.8E-1  | 1.0E0     |
| <input type="checkbox"/> | SP_PIR_KEYWORDS       | <a href="#">wd repeat</a>                                | RT |  |  |  | 10    | 9.9E-1  | 1.0E0     |
| <input type="checkbox"/> | INTERPRO              | <a href="#">WD40/YVTN repeat-like</a>                    | RT |  |  |  | 13    | 1.0E0   | 1.0E0     |
| <input type="checkbox"/> | INTERPRO              | <a href="#">WD40 repeat</a>                              | RT |  |  |  | 13    | 1.0E0   | 1.0E0     |
|                          | Annotation Cluster 52 | Enrichment Score: 0                                      |    |  |  |  | Count | P_Value | Benjamini |
| <input type="checkbox"/> | SMART                 | <a href="#">ANK</a>                                      | RT |  |  |  | 85    | 9.7E-1  | 1.0E0     |
| <input type="checkbox"/> | INTERPRO              | <a href="#">Ankyrin</a>                                  | RT |  |  |  | 85    | 1.0E0   | 1.0E0     |
| <input type="checkbox"/> | SP_PIR_KEYWORDS       | <a href="#">ank repeat</a>                               | RT |  |  |  | 62    | 1.0E0   | 1.0E0     |
|                          | Annotation Cluster 53 | Enrichment Score: 0                                      |    |  |  |  | Count | P_Value | Benjamini |
| <input type="checkbox"/> | GOTERM_MF_FAT         | <a href="#">ion binding</a>                              | RT |  |  |  | 74    | 1.0E0   | 1.0E0     |
| <input type="checkbox"/> | GOTERM_MF_FAT         | <a href="#">cation binding</a>                           | RT |  |  |  | 74    | 1.0E0   | 1.0E0     |
| <input type="checkbox"/> | GOTERM_MF_FAT         | <a href="#">metal ion binding</a>                        | RT |  |  |  | 71    | 1.0E0   | 1.0E0     |
| <input type="checkbox"/> | GOTERM_MF_FAT         | <a href="#">transition metal ion binding</a>             | RT |  |  |  | 34    | 1.0E0   | 1.0E0     |
|                          | Annotation Cluster 54 | Enrichment Score: 0                                      |    |  |  |  | Count | P_Value | Benjamini |
| <input type="checkbox"/> | GOTERM_BP_FAT         | <a href="#">cellular response to stress</a>              | RT |  |  |  | 4     | 1.0E0   | 1.0E0     |
| <input type="checkbox"/> | GOTERM_BP_FAT         | <a href="#">DNA repair</a>                               | RT |  |  |  | 3     | 1.0E0   | 1.0E0     |
| <input type="checkbox"/> | GOTERM_BP_FAT         | <a href="#">response to DNA damage stimulus</a>          | RT |  |  |  | 3     | 1.0E0   | 1.0E0     |
| <input type="checkbox"/> | GOTERM_BP_FAT         | <a href="#">DNA metabolic process</a>                    | RT |  |  |  | 4     | 1.0E0   | 1.0E0     |
|                          | Annotation Cluster 55 | Enrichment Score: 0                                      |    |  |  |  | Count | P_Value | Benjamini |
| <input type="checkbox"/> | KEGG_PATHWAY          | <a href="#">Mismatch repair</a>                          | RT |  |  |  | 3     | 1.0E0   | 1.0E0     |
| <input type="checkbox"/> | KEGG_PATHWAY          | <a href="#">Nucleotide excision repair</a>               | RT |  |  |  | 3     | 1.0E0   | 1.0E0     |
| <input type="checkbox"/> | KEGG_PATHWAY          | <a href="#">DNA replication</a>                          | RT |  |  |  | 3     | 1.0E0   | 1.0E0     |
|                          | Annotation Cluster 56 | Enrichment Score: 0                                      |    |  |  |  | Count | P_Value | Benjamini |
| <input type="checkbox"/> | SMART                 | <a href="#">EGF</a>                                      | RT |  |  |  | 20    | 1.0E0   | 1.0E0     |
| <input type="checkbox"/> | SMART                 | <a href="#">FU</a>                                       | RT |  |  |  | 13    | 1.0E0   | 1.0E0     |
| <input type="checkbox"/> | INTERPRO              | <a href="#">EGF-like</a>                                 | RT |  |  |  | 20    | 1.0E0   | 1.0E0     |
| <input type="checkbox"/> | INTERPRO              | <a href="#">Furin-like repeat</a>                        | RT |  |  |  | 13    | 1.0E0   | 1.0E0     |
| <input type="checkbox"/> | INTERPRO              | <a href="#">Giardia variant-specific surface protein</a> | RT |  |  |  | 11    | 1.0E0   | 1.0E0     |

128 terms were not clustered.

Please cite [Nature Protocols 2009; 4\(1\):44 & Genome Biology 2003; 4\(5\):P3](#) within any publication that makes use of any methods inspired by DAVID.

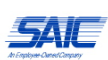

SAIC Frederick  
A Division of Science Applications  
International Corporation

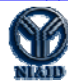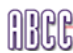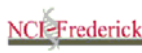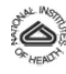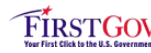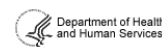

[Term of Service](#) | [Contact Us](#) | [Site Map](#)
