# Supplementary material for: Proteomics of Secretory and Endocytic Organelles in Giardia lamblia
Source: PubMed Central journal article supplement (PMC3986054; doi:10.1371/journal.pone.0094089), 2014-04-14
Supplement: pone.0094089.s011.pdf [file pone.0094089.s011.pdf]

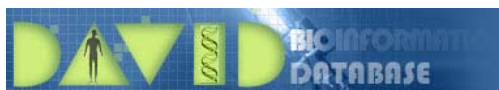

## Functional Annotation Clustering

[Help and Manual](#)

Current Gene List: 3\_Random1

Current Background: Giardia intestinalis

3000 DAVID IDs

Options Classification Stringency Medium

Rerun using options

Create Sublist

73 Cluster(s)

[Download File](#)

|                          | Annotation Cluster 1 | Enrichment Score: 0.91                                         |    |  | Count | P_Value | Benjamini |
|--------------------------|----------------------|----------------------------------------------------------------|----|--|-------|---------|-----------|
| <input type="checkbox"/> | SP_PIR_KEYWORDS      | <a href="#">ank repeat</a>                                     | RT |  | 192   | 8.8E-2  | 1.0E0     |
| <input type="checkbox"/> | INTERPRO             | <a href="#">Ankyrin</a>                                        | RT |  | 265   | 1.2E-1  | 1.0E0     |
| <input type="checkbox"/> | SMART                | <a href="#">ANK</a>                                            | RT |  | 265   | 1.7E-1  | 1.0E0     |
|                          | Annotation Cluster 2 | Enrichment Score: 0.62                                         |    |  | Count | P_Value | Benjamini |
| <input type="checkbox"/> | GOTERM_MF_FAT        | <a href="#">protein serine/threonine kinase activity</a>       | RT |  | 72    | 1.3E-2  | 1.0E0     |
| <input type="checkbox"/> | INTERPRO             | <a href="#">Serine/threonine protein kinase, active site</a>   | RT |  | 60    | 7.0E-2  | 1.0E0     |
| <input type="checkbox"/> | GOTERM_MF_FAT        | <a href="#">purine nucleotide binding</a>                      | RT |  | 344   | 1.2E-1  | 1.0E0     |
| <input type="checkbox"/> | GOTERM_MF_FAT        | <a href="#">ribonucleotide binding</a>                         | RT |  | 339   | 1.5E-1  | 1.0E0     |
| <input type="checkbox"/> | GOTERM_MF_FAT        | <a href="#">purine ribonucleotide binding</a>                  | RT |  | 339   | 1.5E-1  | 1.0E0     |
| <input type="checkbox"/> | GOTERM_MF_FAT        | <a href="#">adenyl nucleotide binding</a>                      | RT |  | 313   | 2.1E-1  | 1.0E0     |
| <input type="checkbox"/> | GOTERM_MF_FAT        | <a href="#">purine nucleoside binding</a>                      | RT |  | 313   | 2.1E-1  | 1.0E0     |
| <input type="checkbox"/> | GOTERM_MF_FAT        | <a href="#">nucleotide binding</a>                             | RT |  | 361   | 2.3E-1  | 1.0E0     |
| <input type="checkbox"/> | GOTERM_MF_FAT        | <a href="#">adenyl ribonucleotide binding</a>                  | RT |  | 308   | 2.4E-1  | 1.0E0     |
| <input type="checkbox"/> | GOTERM_MF_FAT        | <a href="#">ATP binding</a>                                    | RT |  | 308   | 2.4E-1  | 1.0E0     |
| <input type="checkbox"/> | GOTERM_MF_FAT        | <a href="#">nucleoside binding</a>                             | RT |  | 314   | 2.5E-1  | 1.0E0     |
| <input type="checkbox"/> | SP_PIR_KEYWORDS      | <a href="#">kinase</a>                                         | RT |  | 200   | 2.7E-1  | 1.0E0     |
| <input type="checkbox"/> | GOTERM_BP_FAT        | <a href="#">protein amino acid phosphorylation</a>             | RT |  | 157   | 2.7E-1  | 1.0E0     |
| <input type="checkbox"/> | GOTERM_BP_FAT        | <a href="#">phosphorylation</a>                                | RT |  | 167   | 3.2E-1  | 1.0E0     |
| <input type="checkbox"/> | INTERPRO             | <a href="#">Serine/threonine protein kinase</a>                | RT |  | 37    | 3.2E-1  | 1.0E0     |
| <input type="checkbox"/> | GOTERM_BP_FAT        | <a href="#">phosphorus metabolic process</a>                   | RT |  | 176   | 3.2E-1  | 1.0E0     |
| <input type="checkbox"/> | GOTERM_BP_FAT        | <a href="#">phosphate metabolic process</a>                    | RT |  | 176   | 3.2E-1  | 1.0E0     |
| <input type="checkbox"/> | INTERPRO             | <a href="#">Protein kinase, ATP binding site</a>               | RT |  | 51    | 3.4E-1  | 1.0E0     |
| <input type="checkbox"/> | GOTERM_MF_FAT        | <a href="#">protein kinase activity</a>                        | RT |  | 159   | 3.5E-1  | 1.0E0     |
| <input type="checkbox"/> | SMART                | <a href="#">S_TKc</a>                                          | RT |  | 37    | 3.5E-1  | 1.0E0     |
| <input type="checkbox"/> | INTERPRO             | <a href="#">Serine/threonine protein kinase-related</a>        | RT |  | 139   | 3.7E-1  | 1.0E0     |
| <input type="checkbox"/> | SP_PIR_KEYWORDS      | <a href="#">atp-binding</a>                                    | RT |  | 154   | 4.3E-1  | 1.0E0     |
| <input type="checkbox"/> | INTERPRO             | <a href="#">Protein kinase, core</a>                           | RT |  | 156   | 4.9E-1  | 1.0E0     |
| <input type="checkbox"/> | SP_PIR_KEYWORDS      | <a href="#">serine/threonine-protein kinase</a>                | RT |  | 37    | 5.6E-1  | 1.0E0     |
| <input type="checkbox"/> | SP_PIR_KEYWORDS      | <a href="#">nucleotide-binding</a>                             | RT |  | 158   | 6.2E-1  | 1.0E0     |
|                          | Annotation Cluster 3 | Enrichment Score: 0.6                                          |    |  | Count | P_Value | Benjamini |
| <input type="checkbox"/> | GOTERM_BP_FAT        | <a href="#">hexose catabolic process</a>                       | RT |  | 11    | 2.0E-1  | 1.0E0     |
| <input type="checkbox"/> | GOTERM_BP_FAT        | <a href="#">carbohydrate catabolic process</a>                 | RT |  | 11    | 2.0E-1  | 1.0E0     |
| <input type="checkbox"/> | GOTERM_BP_FAT        | <a href="#">monosaccharide catabolic process</a>               | RT |  | 11    | 2.0E-1  | 1.0E0     |
| <input type="checkbox"/> | GOTERM_BP_FAT        | <a href="#">alcohol catabolic process</a>                      | RT |  | 11    | 2.0E-1  | 1.0E0     |
| <input type="checkbox"/> | GOTERM_BP_FAT        | <a href="#">cellular carbohydrate catabolic process</a>        | RT |  | 11    | 2.0E-1  | 1.0E0     |
| <input type="checkbox"/> | GOTERM_BP_FAT        | <a href="#">glucose catabolic process</a>                      | RT |  | 11    | 2.0E-1  | 1.0E0     |
| <input type="checkbox"/> | GOTERM_BP_FAT        | <a href="#">glycolysis</a>                                     | RT |  | 9     | 2.2E-1  | 1.0E0     |
| <input type="checkbox"/> | GOTERM_BP_FAT        | <a href="#">monosaccharide metabolic process</a>               | RT |  | 16    | 2.7E-1  | 1.0E0     |
| <input type="checkbox"/> | GOTERM_BP_FAT        | <a href="#">hexose metabolic process</a>                       | RT |  | 14    | 3.0E-1  | 1.0E0     |
| <input type="checkbox"/> | GOTERM_BP_FAT        | <a href="#">glucose metabolic process</a>                      | RT |  | 14    | 3.0E-1  | 1.0E0     |
| <input type="checkbox"/> | GOTERM_BP_FAT        | <a href="#">generation of precursor metabolites and energy</a> | RT |  | 17    | 3.8E-1  | 1.0E0     |
| <input type="checkbox"/> | SP_PIR_KEYWORDS      | <a href="#">glycolysis</a>                                     | RT |  | 5     | 5.2E-1  | 1.0E0     |
|                          | Annotation Cluster 4 | Enrichment Score: 0.59                                         |    |  | Count | P_Value | Benjamini |
| <input type="checkbox"/> | GOTERM_MF_FAT        | <a href="#">ion binding</a>                                    | RT |  | 158   | 1.1E-1  | 1.0E0     |
| <input type="checkbox"/> | GOTERM_MF_FAT        | <a href="#">cation binding</a>                                 | RT |  | 158   | 1.1E-1  | 1.0E0     |

| <input type="checkbox"/> |                 |                                                                                                        |    |  | Count                  | P_Value | Benjamini |
|--------------------------|-----------------|--------------------------------------------------------------------------------------------------------|----|--|------------------------|---------|-----------|
| <input type="checkbox"/> | GOTERM_MF_FAT   | <a href="#">metal ion binding</a>                                                                      | RT |  | 156                    | 1.2E-1  | 1.0E0     |
| <input type="checkbox"/> | GOTERM_MF_FAT   | <a href="#">transition metal ion binding</a>                                                           | RT |  | 115                    | 1.7E-1  | 1.0E0     |
| <input type="checkbox"/> | GOTERM_MF_FAT   | <a href="#">zinc ion binding</a>                                                                       | RT |  | 92                     | 2.6E-1  | 1.0E0     |
| <input type="checkbox"/> | INTERPRO        | <a href="#">Zinc finger, RING-type</a>                                                                 | RT |  | 43                     | 2.7E-1  | 1.0E0     |
| <input type="checkbox"/> | SMART           | <a href="#">RING</a>                                                                                   | RT |  | 43                     | 3.0E-1  | 1.0E0     |
| <input type="checkbox"/> | SP_PIR_KEYWORDS | <a href="#">zinc-finger</a>                                                                            | RT |  | 39                     | 3.5E-1  | 1.0E0     |
| <input type="checkbox"/> | INTERPRO        | <a href="#">Zinc finger, C3HC4 RING-type</a>                                                           | RT |  | 22                     | 4.9E-1  | 1.0E0     |
| <input type="checkbox"/> | SP_PIR_KEYWORDS | <a href="#">zinc</a>                                                                                   | RT |  | 50                     | 6.0E-1  | 1.0E0     |
| <input type="checkbox"/> | SP_PIR_KEYWORDS | <a href="#">metal-binding</a>                                                                          | RT |  | 59                     | 6.3E-1  | 9.9E-1    |
| Annotation Cluster 5     |                 |                                                                                                        |    |  | Enrichment Score: 0.54 |         |           |
| <input type="checkbox"/> | INTERPRO        | <a href="#">ARF/SAR superfamily</a>                                                                    | RT |  | 7                      | 1.4E-1  | 1.0E0     |
| <input type="checkbox"/> | PIR_SUPERFAMILY | PIRSF001711:ADP-ribosylation factor                                                                    | RT |  | 5                      | 2.4E-1  | 1.0E0     |
| <input type="checkbox"/> | INTERPRO        | <a href="#">ADP-ribosylation factor</a>                                                                | RT |  | 4                      | 4.4E-1  | 1.0E0     |
| <input type="checkbox"/> | SMART           | <a href="#">ARF</a>                                                                                    | RT |  | 4                      | 4.5E-1  | 1.0E0     |
| Annotation Cluster 6     |                 |                                                                                                        |    |  | Enrichment Score: 0.49 |         |           |
| <input type="checkbox"/> | INTERPRO        | <a href="#">Zinc finger, C2H2-like</a>                                                                 | RT |  | 13                     | 3.2E-1  | 1.0E0     |
| <input type="checkbox"/> | INTERPRO        | <a href="#">Zinc finger, C2H2-type</a>                                                                 | RT |  | 13                     | 3.2E-1  | 1.0E0     |
| <input type="checkbox"/> | SMART           | <a href="#">ZnF_C2H2</a>                                                                               | RT |  | 13                     | 3.3E-1  | 1.0E0     |
| Annotation Cluster 7     |                 |                                                                                                        |    |  | Enrichment Score: 0.47 |         |           |
| <input type="checkbox"/> | INTERPRO        | <a href="#">EGF-like</a>                                                                               | RT |  | 118                    | 1.8E-1  | 1.0E0     |
| <input type="checkbox"/> | SMART           | <a href="#">EGF</a>                                                                                    | RT |  | 118                    | 2.3E-1  | 1.0E0     |
| <input type="checkbox"/> | INTERPRO        | <a href="#">Giardia variant-specific surface protein</a>                                               | RT |  | 140                    | 4.4E-1  | 1.0E0     |
| <input type="checkbox"/> | INTERPRO        | <a href="#">Furin-like repeat</a>                                                                      | RT |  | 109                    | 4.8E-1  | 1.0E0     |
| <input type="checkbox"/> | SMART           | <a href="#">FU</a>                                                                                     | RT |  | 109                    | 5.5E-1  | 1.0E0     |
| Annotation Cluster 8     |                 |                                                                                                        |    |  | Enrichment Score: 0.45 |         |           |
| <input type="checkbox"/> | GOTERM_CC_FAT   | <a href="#">endomembrane system</a>                                                                    | RT |  | 12                     | 2.4E-1  | 1.0E0     |
| <input type="checkbox"/> | GOTERM_CC_FAT   | <a href="#">organelle envelope</a>                                                                     | RT |  | 5                      | 2.8E-1  | 1.0E0     |
| <input type="checkbox"/> | GOTERM_CC_FAT   | <a href="#">envelope</a>                                                                               | RT |  | 5                      | 2.8E-1  | 1.0E0     |
| <input type="checkbox"/> | GOTERM_CC_FAT   | <a href="#">nuclear pore</a>                                                                           | RT |  | 5                      | 2.8E-1  | 1.0E0     |
| <input type="checkbox"/> | GOTERM_CC_FAT   | <a href="#">nuclear envelope</a>                                                                       | RT |  | 5                      | 2.8E-1  | 1.0E0     |
| <input type="checkbox"/> | GOTERM_CC_FAT   | <a href="#">pore complex</a>                                                                           | RT |  | 5                      | 2.8E-1  | 1.0E0     |
| <input type="checkbox"/> | GOTERM_BP_FAT   | <a href="#">nuclear transport</a>                                                                      | RT |  | 3                      | 7.8E-1  | 1.0E0     |
| <input type="checkbox"/> | GOTERM_BP_FAT   | <a href="#">nucleocytoplasmic transport</a>                                                            | RT |  | 3                      | 7.8E-1  | 1.0E0     |
| Annotation Cluster 9     |                 |                                                                                                        |    |  | Enrichment Score: 0.42 |         |           |
| <input type="checkbox"/> | INTERPRO        | <a href="#">Small GTP-binding protein</a>                                                              | RT |  | 15                     | 2.0E-1  | 1.0E0     |
| <input type="checkbox"/> | GOTERM_BP_FAT   | <a href="#">small GTPase mediated signal transduction</a>                                              | RT |  | 12                     | 2.4E-1  | 1.0E0     |
| <input type="checkbox"/> | GOTERM_MF_FAT   | <a href="#">GTP binding</a>                                                                            | RT |  | 31                     | 2.9E-1  | 1.0E0     |
| <input type="checkbox"/> | GOTERM_MF_FAT   | <a href="#">guanyl nucleotide binding</a>                                                              | RT |  | 31                     | 2.9E-1  | 1.0E0     |
| <input type="checkbox"/> | GOTERM_MF_FAT   | <a href="#">guanyl ribonucleotide binding</a>                                                          | RT |  | 31                     | 2.9E-1  | 1.0E0     |
| <input type="checkbox"/> | GOTERM_BP_FAT   | <a href="#">intracellular signaling cascade</a>                                                        | RT |  | 14                     | 4.0E-1  | 1.0E0     |
| <input type="checkbox"/> | INTERPRO        | <a href="#">Ras GTPase</a>                                                                             | RT |  | 9                      | 5.2E-1  | 1.0E0     |
| <input type="checkbox"/> | INTERPRO        | <a href="#">Ras</a>                                                                                    | RT |  | 8                      | 6.2E-1  | 1.0E0     |
| <input type="checkbox"/> | SP_PIR_KEYWORDS | <a href="#">gtp-binding</a>                                                                            | RT |  | 24                     | 6.4E-1  | 9.9E-1    |
| <input type="checkbox"/> | PIR_SUPERFAMILY | PIRSF001710:Ras-related protein Rab                                                                    | RT |  | 4                      | 7.3E-1  | 1.0E0     |
| Annotation Cluster 10    |                 |                                                                                                        |    |  | Enrichment Score: 0.39 |         |           |
| <input type="checkbox"/> | GOTERM_BP_FAT   | <a href="#">mRNA metabolic process</a>                                                                 | RT |  | 6                      | 1.8E-1  | 1.0E0     |
| <input type="checkbox"/> | GOTERM_BP_FAT   | <a href="#">mRNA processing</a>                                                                        | RT |  | 5                      | 2.8E-1  | 1.0E0     |
| <input type="checkbox"/> | GOTERM_BP_FAT   | <a href="#">mRNA capping</a>                                                                           | RT |  | 3                      | 6.0E-1  | 1.0E0     |
| <input type="checkbox"/> | GOTERM_BP_FAT   | <a href="#">RNA capping</a>                                                                            | RT |  | 3                      | 8.9E-1  | 1.0E0     |
| Annotation Cluster 11    |                 |                                                                                                        |    |  | Enrichment Score: 0.39 |         |           |
| <input type="checkbox"/> | INTERPRO        | <a href="#">Metallophosphoesterase</a>                                                                 | RT |  | 16                     | 1.6E-1  | 1.0E0     |
| <input type="checkbox"/> | GOTERM_MF_FAT   | <a href="#">phosphatase activity</a>                                                                   | RT |  | 28                     | 3.6E-1  | 1.0E0     |
| <input type="checkbox"/> | GOTERM_MF_FAT   | <a href="#">iron ion binding</a>                                                                       | RT |  | 20                     | 4.1E-1  | 1.0E0     |
| <input type="checkbox"/> | GOTERM_MF_FAT   | <a href="#">phosphoprotein phosphatase activity</a>                                                    | RT |  | 18                     | 4.4E-1  | 1.0E0     |
| <input type="checkbox"/> | PIR_SUPERFAMILY | PIRSF000908:serine/threonine-protein phosphatase, conventional type                                    | RT |  | 6                      | 4.6E-1  | 1.0E0     |
| <input type="checkbox"/> | INTERPRO        | <a href="#">Serine/threonine-specific protein phosphatase and bis(5-nucleosyl)-tetrakisphosphatase</a> | RT |  | 10                     | 5.5E-1  | 1.0E0     |
| <input type="checkbox"/> | SP_PIR_KEYWORDS | <a href="#">iron</a>                                                                                   | RT |  | 13                     | 5.6E-1  | 1.0E0     |
| <input type="checkbox"/> |                 | <a href="#">PP2Ac</a>                                                                                  | RT |  | 10                     | 5.7E-1  | 1.0E0     |

| <input type="checkbox"/> | SMART           |                                                                            | Enrichment Score: 0.38 |  |  | Count | P_Value | Benjamini |
|--------------------------|-----------------|----------------------------------------------------------------------------|------------------------|--|--|-------|---------|-----------|
| Annotation Cluster 12    |                 |                                                                            |                        |  |  |       |         |           |
| <input type="checkbox"/> | INTERPRO        | <a href="#">EGF_extracellular</a>                                          | RT                     |  |  | 17    | 1.9E-1  | 1.0E0     |
| <input type="checkbox"/> | SP_PIR_KEYWORDS | <a href="#">egf-like domain</a>                                            | RT                     |  |  | 11    | 6.1E-1  | 1.0E0     |
| <input type="checkbox"/> | INTERPRO        | <a href="#">EGF-like_type 3</a>                                            | RT                     |  |  | 19    | 6.6E-1  | 1.0E0     |
| Annotation Cluster 13    |                 |                                                                            |                        |  |  |       |         |           |
| Enrichment Score: 0.37   |                 |                                                                            |                        |  |  |       |         |           |
| <input type="checkbox"/> | GOTERM_BP_FAT   | <a href="#">establishment of protein localization</a>                      | RT                     |  |  | 22    | 2.6E-1  | 1.0E0     |
| <input type="checkbox"/> | GOTERM_BP_FAT   | <a href="#">protein transport</a>                                          | RT                     |  |  | 22    | 2.6E-1  | 1.0E0     |
| <input type="checkbox"/> | GOTERM_BP_FAT   | <a href="#">cellular macromolecule localization</a>                        | RT                     |  |  | 16    | 2.7E-1  | 1.0E0     |
| <input type="checkbox"/> | GOTERM_BP_FAT   | <a href="#">cellular protein localization</a>                              | RT                     |  |  | 16    | 2.7E-1  | 1.0E0     |
| <input type="checkbox"/> | GOTERM_BP_FAT   | <a href="#">intracellular protein transport</a>                            | RT                     |  |  | 16    | 2.7E-1  | 1.0E0     |
| <input type="checkbox"/> | GOTERM_BP_FAT   | <a href="#">protein localization</a>                                       | RT                     |  |  | 22    | 3.3E-1  | 1.0E0     |
| <input type="checkbox"/> | GOTERM_BP_FAT   | <a href="#">intracellular transport</a>                                    | RT                     |  |  | 18    | 4.1E-1  | 1.0E0     |
| <input type="checkbox"/> | GOTERM_CC_FAT   | <a href="#">membrane coat</a>                                              | RT                     |  |  | 9     | 6.1E-1  | 1.0E0     |
| <input type="checkbox"/> | GOTERM_CC_FAT   | <a href="#">coated membrane</a>                                            | RT                     |  |  | 9     | 6.1E-1  | 1.0E0     |
| <input type="checkbox"/> | GOTERM_CC_FAT   | <a href="#">Golgi apparatus</a>                                            | RT                     |  |  | 7     | 6.9E-1  | 1.0E0     |
| <input type="checkbox"/> | GOTERM_BP_FAT   | <a href="#">vesicle-mediated transport</a>                                 | RT                     |  |  | 15    | 8.7E-1  | 1.0E0     |
| <input type="checkbox"/> | INTERPRO        | <a href="#">Clathrin/coatomer adaptor_adaptin-like_N-terminal</a>          | RT                     |  |  | 3     | 9.0E-1  | 1.0E0     |
| Annotation Cluster 14    |                 |                                                                            |                        |  |  |       |         |           |
| Enrichment Score: 0.36   |                 |                                                                            |                        |  |  |       |         |           |
| <input type="checkbox"/> | INTERPRO        | <a href="#">DNA/RNA helicase_DEAD/DEAH box type_N-terminal</a>             | RT                     |  |  | 21    | 2.3E-1  | 1.0E0     |
| <input type="checkbox"/> | GOTERM_MF_FAT   | <a href="#">purine NTP-dependent helicase activity</a>                     | RT                     |  |  | 25    | 2.9E-1  | 1.0E0     |
| <input type="checkbox"/> | GOTERM_MF_FAT   | <a href="#">ATP-dependent helicase activity</a>                            | RT                     |  |  | 25    | 2.9E-1  | 1.0E0     |
| <input type="checkbox"/> | GOTERM_MF_FAT   | <a href="#">ATPase activity</a>                                            | RT                     |  |  | 58    | 3.0E-1  | 1.0E0     |
| <input type="checkbox"/> | INTERPRO        | <a href="#">DNA/RNA helicase_C-terminal</a>                                | RT                     |  |  | 28    | 3.9E-1  | 1.0E0     |
| <input type="checkbox"/> | SMART           | <a href="#">HELICc</a>                                                     | RT                     |  |  | 28    | 4.3E-1  | 1.0E0     |
| <input type="checkbox"/> | INTERPRO        | <a href="#">Helicase_superfamily 1 and 2_ATP-binding</a>                   | RT                     |  |  | 27    | 4.4E-1  | 1.0E0     |
| <input type="checkbox"/> | GOTERM_MF_FAT   | <a href="#">ATPase activity_coupled</a>                                    | RT                     |  |  | 42    | 4.8E-1  | 1.0E0     |
| <input type="checkbox"/> | SP_PIR_KEYWORDS | <a href="#">helicase</a>                                                   | RT                     |  |  | 27    | 5.6E-1  | 1.0E0     |
| <input type="checkbox"/> | INTERPRO        | <a href="#">DEAD-like helicase_N-terminal</a>                              | RT                     |  |  | 26    | 5.7E-1  | 1.0E0     |
| <input type="checkbox"/> | SMART           | <a href="#">DEXDc</a>                                                      | RT                     |  |  | 26    | 6.0E-1  | 1.0E0     |
| <input type="checkbox"/> | GOTERM_MF_FAT   | <a href="#">helicase activity</a>                                          | RT                     |  |  | 31    | 6.7E-1  | 1.0E0     |
| <input type="checkbox"/> | INTERPRO        | <a href="#">RNA helicase_DEAD-box type_Q motif</a>                         | RT                     |  |  | 10    | 7.6E-1  | 1.0E0     |
| Annotation Cluster 15    |                 |                                                                            |                        |  |  |       |         |           |
| Enrichment Score: 0.35   |                 |                                                                            |                        |  |  |       |         |           |
| <input type="checkbox"/> | GOTERM_CC_FAT   | <a href="#">endoplasmic reticulum</a>                                      | RT                     |  |  | 6     | 1.9E-1  | 1.0E0     |
| <input type="checkbox"/> | GOTERM_CC_FAT   | <a href="#">organelle membrane</a>                                         | RT                     |  |  | 8     | 4.5E-1  | 1.0E0     |
| <input type="checkbox"/> | GOTERM_CC_FAT   | <a href="#">nuclear envelope-endoplasmic reticulum network</a>             | RT                     |  |  | 3     | 6.0E-1  | 1.0E0     |
| <input type="checkbox"/> | GOTERM_CC_FAT   | <a href="#">endoplasmic reticulum membrane</a>                             | RT                     |  |  | 3     | 6.0E-1  | 1.0E0     |
| <input type="checkbox"/> | GOTERM_CC_FAT   | <a href="#">endoplasmic reticulum part</a>                                 | RT                     |  |  | 3     | 6.0E-1  | 1.0E0     |
| Annotation Cluster 16    |                 |                                                                            |                        |  |  |       |         |           |
| Enrichment Score: 0.33   |                 |                                                                            |                        |  |  |       |         |           |
| <input type="checkbox"/> | GOTERM_CC_FAT   | <a href="#">proteasome complex</a>                                         | RT                     |  |  | 16    | 1.2E-1  | 1.0E0     |
| <input type="checkbox"/> | GOTERM_CC_FAT   | <a href="#">proteasome core complex</a>                                    | RT                     |  |  | 11    | 2.0E-1  | 1.0E0     |
| <input type="checkbox"/> | GOTERM_MF_FAT   | <a href="#">threonine-type endopeptidase activity</a>                      | RT                     |  |  | 11    | 2.2E-1  | 1.0E0     |
| <input type="checkbox"/> | GOTERM_MF_FAT   | <a href="#">threonine-type peptidase activity</a>                          | RT                     |  |  | 11    | 2.2E-1  | 1.0E0     |
| <input type="checkbox"/> | GOTERM_CC_FAT   | <a href="#">cytosol</a>                                                    | RT                     |  |  | 20    | 2.2E-1  | 1.0E0     |
| <input type="checkbox"/> | SP_PIR_KEYWORDS | <a href="#">proteasome</a>                                                 | RT                     |  |  | 15    | 2.2E-1  | 1.0E0     |
| <input type="checkbox"/> | INTERPRO        | <a href="#">Proteasome_subunit alpha/beta</a>                              | RT                     |  |  | 11    | 2.3E-1  | 1.0E0     |
| <input type="checkbox"/> | KEGG_PATHWAY    | <a href="#">Proteasome</a>                                                 | RT                     |  |  | 19    | 2.7E-1  | 1.0E0     |
| <input type="checkbox"/> | INTERPRO        | <a href="#">Proteasome_alpha and beta subunits</a>                         | RT                     |  |  | 10    | 3.0E-1  | 1.0E0     |
| <input type="checkbox"/> | PIR_SUPERFAMILY | <a href="#">PIRSF001212:multicatalytic endopeptidase complex chain C9</a>  | RT                     |  |  | 5     | 4.3E-1  | 1.0E0     |
| <input type="checkbox"/> | INTERPRO        | <a href="#">Proteasome_alpha-subunit_conserved site</a>                    | RT                     |  |  | 5     | 6.7E-1  | 1.0E0     |
| <input type="checkbox"/> | GOTERM_BP_FAT   | <a href="#">cellular macromolecule catabolic process</a>                   | RT                     |  |  | 19    | 7.3E-1  | 1.0E0     |
| <input type="checkbox"/> | GOTERM_BP_FAT   | <a href="#">proteolysis</a>                                                | RT                     |  |  | 48    | 7.8E-1  | 1.0E0     |
| <input type="checkbox"/> | GOTERM_BP_FAT   | <a href="#">ubiquitin-dependent protein catabolic process</a>              | RT                     |  |  | 8     | 7.8E-1  | 1.0E0     |
| <input type="checkbox"/> | GOTERM_BP_FAT   | <a href="#">cellular protein catabolic process</a>                         | RT                     |  |  | 18    | 7.8E-1  | 1.0E0     |
| <input type="checkbox"/> | GOTERM_BP_FAT   | <a href="#">proteolysis involved in cellular protein catabolic process</a> | RT                     |  |  | 18    | 7.8E-1  | 1.0E0     |
| <input type="checkbox"/> | GOTERM_BP_FAT   | <a href="#">macromolecule catabolic process</a>                            | RT                     |  |  | 21    | 8.0E-1  | 1.0E0     |
| <input type="checkbox"/> | SP_PIR_KEYWORDS | <a href="#">threonine protease</a>                                         | RT                     |  |  | 4     | 8.1E-1  | 9.9E-1    |

|                          |                       |                                                                                       |    |  |       |         |           |  |
|--------------------------|-----------------------|---------------------------------------------------------------------------------------|----|--|-------|---------|-----------|--|
| <input type="checkbox"/> | GOTERM_BP_FAT         | <a href="#">protein catabolic process</a>                                             | RT |  | 20    | 8.4E-1  | 1.0E0     |  |
| <input type="checkbox"/> | GOTERM_BP_FAT         | <a href="#">modification-dependent protein catabolic process</a>                      | RT |  | 12    | 9.5E-1  | 1.0E0     |  |
| <input type="checkbox"/> | GOTERM_BP_FAT         | <a href="#">modification-dependent macromolecule catabolic process</a>                | RT |  | 12    | 9.5E-1  | 1.0E0     |  |
| <input type="checkbox"/> | SP_PIR_KEYWORDS       | <a href="#">ubl conjugation pathway</a>                                               | RT |  | 4     | 1.0E0   | 1.0E0     |  |
|                          | Annotation Cluster 17 | Enrichment Score: 0.33                                                                |    |  | Count | P_Value | Benjamini |  |
| <input type="checkbox"/> | INTERPRO              | <a href="#">Kelch-type beta propeller</a>                                             | RT |  | 6     | 3.8E-1  | 1.0E0     |  |
| <input type="checkbox"/> | INTERPRO              | <a href="#">Kelch repeat type 1</a>                                                   | RT |  | 5     | 5.1E-1  | 1.0E0     |  |
| <input type="checkbox"/> | SMART                 | <a href="#">Kelch</a>                                                                 | RT |  | 5     | 5.2E-1  | 1.0E0     |  |
|                          | Annotation Cluster 18 | Enrichment Score: 0.32                                                                |    |  | Count | P_Value | Benjamini |  |
| <input type="checkbox"/> | GOTERM_MF_FAT         | <a href="#">pyridoxal phosphate binding</a>                                           | RT |  | 8     | 3.2E-1  | 1.0E0     |  |
| <input type="checkbox"/> | GOTERM_MF_FAT         | <a href="#">vitamin B6 binding</a>                                                    | RT |  | 8     | 3.2E-1  | 1.0E0     |  |
| <input type="checkbox"/> | GOTERM_MF_FAT         | <a href="#">vitamin binding</a>                                                       | RT |  | 8     | 4.6E-1  | 1.0E0     |  |
| <input type="checkbox"/> | INTERPRO              | <a href="#">Pyridoxal phosphate-dependent transferase, major region, subdomain 1</a>  | RT |  | 6     | 5.5E-1  | 1.0E0     |  |
| <input type="checkbox"/> | INTERPRO              | <a href="#">Aminotransferase, class I and II</a>                                      | RT |  | 4     | 6.5E-1  | 1.0E0     |  |
| <input type="checkbox"/> | GOTERM_MF_FAT         | <a href="#">transferase activity, transferring nitrogenous groups</a>                 | RT |  | 5     | 6.6E-1  | 1.0E0     |  |
|                          | Annotation Cluster 19 | Enrichment Score: 0.28                                                                |    |  | Count | P_Value | Benjamini |  |
| <input type="checkbox"/> | GOTERM_CC_FAT         | <a href="#">intrinsic to membrane</a>                                                 | RT |  | 40    | 4.0E-1  | 1.0E0     |  |
| <input type="checkbox"/> | GOTERM_CC_FAT         | <a href="#">integral to membrane</a>                                                  | RT |  | 40    | 4.0E-1  | 1.0E0     |  |
| <input type="checkbox"/> | SP_PIR_KEYWORDS       | <a href="#">membrane</a>                                                              | RT |  | 17    | 5.7E-1  | 1.0E0     |  |
| <input type="checkbox"/> | SP_PIR_KEYWORDS       | <a href="#">transmembrane</a>                                                         | RT |  | 17    | 8.0E-1  | 9.9E-1    |  |
|                          | Annotation Cluster 20 | Enrichment Score: 0.27                                                                |    |  | Count | P_Value | Benjamini |  |
| <input type="checkbox"/> | GOTERM_BP_FAT         | <a href="#">nitrogen compound catabolic process</a>                                   | RT |  | 5     | 4.8E-1  | 1.0E0     |  |
| <input type="checkbox"/> | GOTERM_BP_FAT         | <a href="#">nucleobase, nucleoside and nucleotide catabolic process</a>               | RT |  | 5     | 4.8E-1  | 1.0E0     |  |
| <input type="checkbox"/> | GOTERM_BP_FAT         | <a href="#">nucleobase, nucleoside, nucleotide and nucleic acid catabolic process</a> | RT |  | 5     | 4.8E-1  | 1.0E0     |  |
| <input type="checkbox"/> | GOTERM_BP_FAT         | <a href="#">nucleotide catabolic process</a>                                          | RT |  | 3     | 7.8E-1  | 1.0E0     |  |
|                          | Annotation Cluster 21 | Enrichment Score: 0.26                                                                |    |  | Count | P_Value | Benjamini |  |
| <input type="checkbox"/> | GOTERM_MF_FAT         | <a href="#">nucleoside-triphosphatase regulator activity</a>                          | RT |  | 10    | 2.9E-1  | 1.0E0     |  |
| <input type="checkbox"/> | GOTERM_BP_FAT         | <a href="#">regulation of small GTPase mediated signal transduction</a>               | RT |  | 7     | 4.0E-1  | 1.0E0     |  |
| <input type="checkbox"/> | GOTERM_BP_FAT         | <a href="#">regulation of Ras protein signal transduction</a>                         | RT |  | 7     | 4.0E-1  | 1.0E0     |  |
| <input type="checkbox"/> | GOTERM_MF_FAT         | <a href="#">enzyme activator activity</a>                                             | RT |  | 7     | 4.2E-1  | 1.0E0     |  |
| <input type="checkbox"/> | GOTERM_MF_FAT         | <a href="#">GTPase regulator activity</a>                                             | RT |  | 8     | 4.6E-1  | 1.0E0     |  |
| <input type="checkbox"/> | GOTERM_MF_FAT         | <a href="#">small GTPase regulator activity</a>                                       | RT |  | 8     | 4.6E-1  | 1.0E0     |  |
| <input type="checkbox"/> | GOTERM_BP_FAT         | <a href="#">regulation of hydrolase activity</a>                                      | RT |  | 6     | 5.2E-1  | 1.0E0     |  |
| <input type="checkbox"/> | GOTERM_BP_FAT         | <a href="#">regulation of GTPase activity</a>                                         | RT |  | 6     | 5.2E-1  | 1.0E0     |  |
| <input type="checkbox"/> | INTERPRO              | <a href="#">RabGAP/TBC</a>                                                            | RT |  | 3     | 6.2E-1  | 1.0E0     |  |
| <input type="checkbox"/> | GOTERM_BP_FAT         | <a href="#">regulation of ARF protein signal transduction</a>                         | RT |  | 4     | 6.2E-1  | 1.0E0     |  |
| <input type="checkbox"/> | SMART                 | <a href="#">TBC</a>                                                                   | RT |  | 3     | 6.3E-1  | 1.0E0     |  |
| <input type="checkbox"/> | GOTERM_BP_FAT         | <a href="#">regulation of Ras GTPase activity</a>                                     | RT |  | 5     | 6.4E-1  | 1.0E0     |  |
| <input type="checkbox"/> | GOTERM_MF_FAT         | <a href="#">GTPase activator activity</a>                                             | RT |  | 5     | 6.6E-1  | 1.0E0     |  |
| <input type="checkbox"/> | GOTERM_BP_FAT         | <a href="#">regulation of Rab GTPase activity</a>                                     | RT |  | 3     | 7.8E-1  | 1.0E0     |  |
| <input type="checkbox"/> | GOTERM_BP_FAT         | <a href="#">regulation of Rab protein signal transduction</a>                         | RT |  | 3     | 7.8E-1  | 1.0E0     |  |
| <input type="checkbox"/> | GOTERM_MF_FAT         | <a href="#">Ras GTPase activator activity</a>                                         | RT |  | 3     | 7.9E-1  | 1.0E0     |  |
| <input type="checkbox"/> | GOTERM_MF_FAT         | <a href="#">Rab GTPase activator activity</a>                                         | RT |  | 3     | 7.9E-1  | 1.0E0     |  |
|                          | Annotation Cluster 22 | Enrichment Score: 0.24                                                                |    |  | Count | P_Value | Benjamini |  |
| <input type="checkbox"/> | GOTERM_BP_FAT         | <a href="#">chromosome organization</a>                                               | RT |  | 14    | 2.1E-1  | 1.0E0     |  |
| <input type="checkbox"/> | GOTERM_BP_FAT         | <a href="#">cellular macromolecular complex subunit organization</a>                  | RT |  | 17    | 3.0E-1  | 1.0E0     |  |
| <input type="checkbox"/> | GOTERM_BP_FAT         | <a href="#">cellular macromolecular complex assembly</a>                              | RT |  | 16    | 3.6E-1  | 1.0E0     |  |
| <input type="checkbox"/> | INTERPRO              | <a href="#">Histone-fold</a>                                                          | RT |  | 10    | 4.3E-1  | 1.0E0     |  |
| <input type="checkbox"/> | GOTERM_BP_FAT         | <a href="#">macromolecular complex subunit organization</a>                           | RT |  | 17    | 4.7E-1  | 1.0E0     |  |
| <input type="checkbox"/> | GOTERM_BP_FAT         | <a href="#">chromatin assembly or disassembly</a>                                     | RT |  | 9     | 4.8E-1  | 1.0E0     |  |
| <input type="checkbox"/> | GOTERM_BP_FAT         | <a href="#">chromatin organization</a>                                                | RT |  | 10    | 5.0E-1  | 1.0E0     |  |
| <input type="checkbox"/> | GOTERM_BP_FAT         | <a href="#">macromolecular complex assembly</a>                                       | RT |  | 16    | 5.4E-1  | 1.0E0     |  |
| <input type="checkbox"/> | PIR_SUPERFAMILY       | PIRSF002052:histone H4                                                                | RT |  | 3     | 5.6E-1  | 1.0E0     |  |
| <input type="checkbox"/> | GOTERM_CC_FAT         | <a href="#">chromatin</a>                                                             | RT |  | 8     | 5.8E-1  | 1.0E0     |  |
| <input type="checkbox"/> | INTERPRO              | <a href="#">Histone H4</a>                                                            | RT |  | 3     | 6.2E-1  | 1.0E0     |  |
| <input type="checkbox"/> | SMART                 | <a href="#">H4</a>                                                                    | RT |  | 3     | 6.3E-1  | 1.0E0     |  |

| Annotation               | Term            | RT                                                                         | Count | P-Value | Benjamini |
|--------------------------|-----------------|----------------------------------------------------------------------------|-------|---------|-----------|
| <input type="checkbox"/> | GOTERM_CC_FAT   | <a href="#">chromosome</a>                                                 | 16    | 6.4E-1  | 1.0E0     |
| <input type="checkbox"/> | SP_PIR_KEYWORDS | <a href="#">dna-binding</a>                                                | 21    | 6.6E-1  | 9.9E-1    |
| <input type="checkbox"/> | GOTERM_BP_FAT   | <a href="#">protein-DNA complex assembly</a>                               | 7     | 6.8E-1  | 1.0E0     |
| <input type="checkbox"/> | GOTERM_BP_FAT   | <a href="#">chromatin assembly</a>                                         | 7     | 6.8E-1  | 1.0E0     |
| <input type="checkbox"/> | GOTERM_BP_FAT   | <a href="#">nucleosome organization</a>                                    | 7     | 6.8E-1  | 1.0E0     |
| <input type="checkbox"/> | GOTERM_BP_FAT   | <a href="#">DNA packaging</a>                                              | 7     | 6.8E-1  | 1.0E0     |
| <input type="checkbox"/> | GOTERM_BP_FAT   | <a href="#">nucleosome assembly</a>                                        | 7     | 6.8E-1  | 1.0E0     |
| <input type="checkbox"/> | GOTERM_CC_FAT   | <a href="#">nucleosome</a>                                                 | 7     | 6.9E-1  | 1.0E0     |
| <input type="checkbox"/> | SP_PIR_KEYWORDS | <a href="#">nucleosome core</a>                                            | 5     | 6.9E-1  | 9.9E-1    |
| <input type="checkbox"/> | INTERPRO        | <a href="#">Histone core</a>                                               | 7     | 7.1E-1  | 1.0E0     |
| <input type="checkbox"/> | SP_PIR_KEYWORDS | <a href="#">chromosomal protein</a>                                        | 7     | 7.3E-1  | 9.9E-1    |
| <input type="checkbox"/> | SP_PIR_KEYWORDS | <a href="#">nucleus</a>                                                    | 19    | 8.2E-1  | 9.9E-1    |
| <input type="checkbox"/> | GOTERM_CC_FAT   | <a href="#">protein-DNA complex</a>                                        | 7     | 8.6E-1  | 1.0E0     |
| <input type="checkbox"/> | GOTERM_CC_FAT   | <a href="#">chromosomal part</a>                                           | 9     | 8.6E-1  | 1.0E0     |
| Annotation Cluster 23    |                 | Enrichment Score: 0.22                                                     |       |         |           |
| <input type="checkbox"/> | INTERPRO        | <a href="#">Like-Sm ribonucleoprotein_core</a>                             | 8     | 4.8E-1  | 1.0E0     |
| <input type="checkbox"/> | INTERPRO        | <a href="#">Like-Sm ribonucleoprotein_eukaryotic and archaea-type_core</a> | 5     | 6.7E-1  | 1.0E0     |
| <input type="checkbox"/> | SMART           | <a href="#">Sm</a>                                                         | 5     | 6.9E-1  | 1.0E0     |
| Annotation Cluster 24    |                 | Enrichment Score: 0.21                                                     |       |         |           |
| <input type="checkbox"/> | KEGG_PATHWAY    | <a href="#">Purine metabolism</a>                                          | 21    | 3.1E-1  | 1.0E0     |
| <input type="checkbox"/> | KEGG_PATHWAY    | <a href="#">RNA polymerase</a>                                             | 12    | 4.5E-1  | 1.0E0     |
| <input type="checkbox"/> | KEGG_PATHWAY    | <a href="#">Pyrimidine metabolism</a>                                      | 20    | 5.4E-1  | 1.0E0     |
| <input type="checkbox"/> | GOTERM_MF_FAT   | <a href="#">DNA-directed RNA polymerase activity</a>                       | 14    | 6.2E-1  | 1.0E0     |
| <input type="checkbox"/> | GOTERM_BP_FAT   | <a href="#">transcription</a>                                              | 15    | 6.9E-1  | 1.0E0     |
| <input type="checkbox"/> | SP_PIR_KEYWORDS | <a href="#">nucleotidyltransferase</a>                                     | 15    | 7.0E-1  | 9.9E-1    |
| <input type="checkbox"/> | GOTERM_MF_FAT   | <a href="#">RNA polymerase activity</a>                                    | 14    | 7.1E-1  | 1.0E0     |
| <input type="checkbox"/> | SP_PIR_KEYWORDS | <a href="#">dna-directed rna polymerase</a>                                | 8     | 8.3E-1  | 9.9E-1    |
| <input type="checkbox"/> | GOTERM_MF_FAT   | <a href="#">nucleotidyltransferase activity</a>                            | 37    | 9.2E-1  | 1.0E0     |
| Annotation Cluster 25    |                 | Enrichment Score: 0.2                                                      |       |         |           |
| <input type="checkbox"/> | GOTERM_BP_FAT   | <a href="#">lipoprotein biosynthetic process</a>                           | 4     | 6.2E-1  | 1.0E0     |
| <input type="checkbox"/> | GOTERM_BP_FAT   | <a href="#">lipoprotein metabolic process</a>                              | 4     | 6.2E-1  | 1.0E0     |
| <input type="checkbox"/> | GOTERM_BP_FAT   | <a href="#">protein amino acid lipidation</a>                              | 4     | 6.2E-1  | 1.0E0     |
| Annotation Cluster 26    |                 | Enrichment Score: 0.2                                                      |       |         |           |
| <input type="checkbox"/> | GOTERM_MF_FAT   | <a href="#">intramolecular transferase activity, phosphotransferases</a>   | 4     | 4.3E-1  | 1.0E0     |
| <input type="checkbox"/> | INTERPRO        | <a href="#">Alpha-D-phosphohexomutase_alpha/beta/alpha domain_I</a>        | 3     | 6.2E-1  | 1.0E0     |
| <input type="checkbox"/> | GOTERM_MF_FAT   | <a href="#">intramolecular transferase activity</a>                        | 5     | 9.6E-1  | 1.0E0     |
| Annotation Cluster 27    |                 | Enrichment Score: 0.18                                                     |       |         |           |
| <input type="checkbox"/> | GOTERM_MF_FAT   | <a href="#">electron carrier activity</a>                                  | 16    | 3.0E-1  | 1.0E0     |
| <input type="checkbox"/> | INTERPRO        | <a href="#">4Fe-4S ferredoxin_iron-sulphur binding_conserved site</a>      | 5     | 6.7E-1  | 1.0E0     |
| <input type="checkbox"/> | INTERPRO        | <a href="#">4Fe-4S ferredoxin_iron-sulphur binding_domain</a>              | 6     | 6.9E-1  | 1.0E0     |
| <input type="checkbox"/> | INTERPRO        | <a href="#">4Fe-4S ferredoxin_iron-sulphur binding_subgroup</a>            | 6     | 6.9E-1  | 1.0E0     |
| <input type="checkbox"/> | GOTERM_MF_FAT   | <a href="#">4 iron_4 sulfur cluster binding</a>                            | 5     | 7.9E-1  | 1.0E0     |
| <input type="checkbox"/> | GOTERM_MF_FAT   | <a href="#">iron-sulfur cluster binding</a>                                | 11    | 8.2E-1  | 1.0E0     |
| <input type="checkbox"/> | GOTERM_MF_FAT   | <a href="#">metal cluster binding</a>                                      | 11    | 8.2E-1  | 1.0E0     |
| Annotation Cluster 28    |                 | Enrichment Score: 0.18                                                     |       |         |           |
| <input type="checkbox"/> | INTERPRO        | <a href="#">RNA polymerase Rpb1_domain 3</a>                               | 3     | 6.2E-1  | 1.0E0     |
| <input type="checkbox"/> | INTERPRO        | <a href="#">RNA polymerase_alpha subunit</a>                               | 3     | 6.2E-1  | 1.0E0     |
| <input type="checkbox"/> | INTERPRO        | <a href="#">RNA polymerase_N-terminal</a>                                  | 3     | 6.2E-1  | 1.0E0     |
| <input type="checkbox"/> | INTERPRO        | <a href="#">RNA polymerase Rpb1_domain 4</a>                               | 3     | 6.2E-1  | 1.0E0     |
| <input type="checkbox"/> | INTERPRO        | <a href="#">RNA polymerase Rpb1_domain 1</a>                               | 3     | 6.2E-1  | 1.0E0     |
| <input type="checkbox"/> | INTERPRO        | <a href="#">RNA polymerase Rpb1_domain 5</a>                               | 3     | 6.2E-1  | 1.0E0     |
| <input type="checkbox"/> | SMART           | <a href="#">RPOLA_N</a>                                                    | 3     | 6.3E-1  | 1.0E0     |
| <input type="checkbox"/> | SP_PIR_KEYWORDS | <a href="#">Transcription</a>                                              | 5     | 8.1E-1  | 9.9E-1    |
| <input type="checkbox"/> | SP_PIR_KEYWORDS | <a href="#">dna-directed rna polymerase</a>                                | 8     | 8.3E-1  | 9.9E-1    |
| Annotation Cluster 29    |                 | Enrichment Score: 0.17                                                     |       |         |           |
| <input type="checkbox"/> | GOTERM_BP_FAT   | <a href="#">one-carbon metabolic process</a>                               | 8     | 4.4E-1  | 1.0E0     |
| <input type="checkbox"/> | INTERPRO        | <a href="#">Ribosomal RNA methyltransferase RrmJ/EtsJ</a>                  | 4     | 4.4E-1  | 1.0E0     |

| <input type="checkbox"/> |                       |                                                                                                              |    |  |  |  |  |       |         |           |
|--------------------------|-----------------------|--------------------------------------------------------------------------------------------------------------|----|--|--|--|--|-------|---------|-----------|
| <input type="checkbox"/> | GOTERM_BP_FAT         | <a href="#">methylation</a>                                                                                  | RT |  |  |  |  | 7     | 5.5E-1  | 1.0E0     |
| <input type="checkbox"/> | GOTERM_BP_FAT         | <a href="#">RNA methylation</a>                                                                              | RT |  |  |  |  | 3     | 8.9E-1  | 1.0E0     |
| <input type="checkbox"/> | GOTERM_BP_FAT         | <a href="#">biopolymer methylation</a>                                                                       | RT |  |  |  |  | 3     | 9.4E-1  | 1.0E0     |
| <input type="checkbox"/> | GOTERM_BP_FAT         | <a href="#">RNA modification</a>                                                                             | RT |  |  |  |  | 5     | 1.0E0   | 1.0E0     |
|                          | Annotation Cluster 30 | Enrichment Score: 0.17                                                                                       |    |  |  |  |  | Count | P_Value | Benjamini |
| <input type="checkbox"/> | SP_PIR_KEYWORDS       | <a href="#">Initiation factor</a>                                                                            | RT |  |  |  |  | 12    | 6.4E-1  | 9.9E-1    |
| <input type="checkbox"/> | GOTERM_MF_FAT         | <a href="#">translation initiation factor activity</a>                                                       | RT |  |  |  |  | 15    | 6.4E-1  | 1.0E0     |
| <input type="checkbox"/> | GOTERM_BP_FAT         | <a href="#">translational initiation</a>                                                                     | RT |  |  |  |  | 7     | 6.8E-1  | 1.0E0     |
| <input type="checkbox"/> | GOTERM_MF_FAT         | <a href="#">translation factor activity, nucleic acid binding</a>                                            | RT |  |  |  |  | 18    | 7.6E-1  | 1.0E0     |
|                          | Annotation Cluster 31 | Enrichment Score: 0.17                                                                                       |    |  |  |  |  | Count | P_Value | Benjamini |
| <input type="checkbox"/> | INTERPRO              | <a href="#">ABC transporter, conserved site</a>                                                              | RT |  |  |  |  | 15    | 3.9E-1  | 1.0E0     |
| <input type="checkbox"/> | INTERPRO              | <a href="#">ABC transporter-like</a>                                                                         | RT |  |  |  |  | 15    | 4.9E-1  | 1.0E0     |
| <input type="checkbox"/> | INTERPRO              | <a href="#">ATPase, AAA-type, core</a>                                                                       | RT |  |  |  |  | 14    | 8.0E-1  | 1.0E0     |
| <input type="checkbox"/> | INTERPRO              | <a href="#">ATPase, AAA+ type, core</a>                                                                      | RT |  |  |  |  | 39    | 8.2E-1  | 1.0E0     |
| <input type="checkbox"/> | SMART                 | <a href="#">AAA</a>                                                                                          | RT |  |  |  |  | 39    | 8.5E-1  | 1.0E0     |
| <input type="checkbox"/> | COG_ONTOLOGY          | <a href="#">Defense mechanisms</a>                                                                           | RT |  |  |  |  | 11    | 9.2E-1  | 1.0E0     |
|                          | Annotation Cluster 32 | Enrichment Score: 0.17                                                                                       |    |  |  |  |  | Count | P_Value | Benjamini |
| <input type="checkbox"/> | INTERPRO              | <a href="#">Tetratricopeptide region</a>                                                                     | RT |  |  |  |  | 16    | 4.2E-1  | 1.0E0     |
| <input type="checkbox"/> | INTERPRO              | <a href="#">Tetratricopeptide-like helical</a>                                                               | RT |  |  |  |  | 19    | 5.8E-1  | 1.0E0     |
| <input type="checkbox"/> | INTERPRO              | <a href="#">Tetratricopeptide repeat</a>                                                                     | RT |  |  |  |  | 14    | 7.3E-1  | 1.0E0     |
| <input type="checkbox"/> | SMART                 | <a href="#">TPR</a>                                                                                          | RT |  |  |  |  | 14    | 7.5E-1  | 1.0E0     |
| <input type="checkbox"/> | INTERPRO              | <a href="#">Tetratricopeptide TPR-1</a>                                                                      | RT |  |  |  |  | 11    | 8.3E-1  | 1.0E0     |
| <input type="checkbox"/> | SP_PIR_KEYWORDS       | <a href="#">tpr repeat</a>                                                                                   | RT |  |  |  |  | 5     | 8.9E-1  | 1.0E0     |
|                          | Annotation Cluster 33 | Enrichment Score: 0.16                                                                                       |    |  |  |  |  | Count | P_Value | Benjamini |
| <input type="checkbox"/> | GOTERM_MF_FAT         | <a href="#">NAD or NADH binding</a>                                                                          | RT |  |  |  |  | 6     | 5.4E-1  | 1.0E0     |
| <input type="checkbox"/> | GOTERM_BP_FAT         | <a href="#">regulation of gene expression, epigenetic</a>                                                    | RT |  |  |  |  | 4     | 6.2E-1  | 1.0E0     |
| <input type="checkbox"/> | GOTERM_BP_FAT         | <a href="#">negative regulation of transcription</a>                                                         | RT |  |  |  |  | 4     | 6.2E-1  | 1.0E0     |
| <input type="checkbox"/> | GOTERM_BP_FAT         | <a href="#">chromatin silencing</a>                                                                          | RT |  |  |  |  | 4     | 6.2E-1  | 1.0E0     |
| <input type="checkbox"/> | GOTERM_BP_FAT         | <a href="#">negative regulation of nucleobase, nucleoside, nucleotide and nucleic acid metabolic process</a> | RT |  |  |  |  | 4     | 6.2E-1  | 1.0E0     |
| <input type="checkbox"/> | GOTERM_BP_FAT         | <a href="#">negative regulation of transcription, DNA-dependent</a>                                          | RT |  |  |  |  | 4     | 6.2E-1  | 1.0E0     |
| <input type="checkbox"/> | GOTERM_BP_FAT         | <a href="#">negative regulation of gene expression, epigenetic</a>                                           | RT |  |  |  |  | 4     | 6.2E-1  | 1.0E0     |
| <input type="checkbox"/> | GOTERM_BP_FAT         | <a href="#">negative regulation of macromolecule biosynthetic process</a>                                    | RT |  |  |  |  | 4     | 6.2E-1  | 1.0E0     |
| <input type="checkbox"/> | GOTERM_BP_FAT         | <a href="#">negative regulation of biosynthetic process</a>                                                  | RT |  |  |  |  | 4     | 6.2E-1  | 1.0E0     |
| <input type="checkbox"/> | GOTERM_BP_FAT         | <a href="#">negative regulation of RNA metabolic process</a>                                                 | RT |  |  |  |  | 4     | 6.2E-1  | 1.0E0     |
| <input type="checkbox"/> | GOTERM_BP_FAT         | <a href="#">negative regulation of nitrogen compound metabolic process</a>                                   | RT |  |  |  |  | 4     | 6.2E-1  | 1.0E0     |
| <input type="checkbox"/> | GOTERM_BP_FAT         | <a href="#">negative regulation of cellular biosynthetic process</a>                                         | RT |  |  |  |  | 4     | 6.2E-1  | 1.0E0     |
| <input type="checkbox"/> | GOTERM_MF_FAT         | <a href="#">NAD binding</a>                                                                                  | RT |  |  |  |  | 4     | 6.4E-1  | 1.0E0     |
| <input type="checkbox"/> | INTERPRO              | <a href="#">NAD-dependent histone deacetylase, silent information regulator Sir2</a>                         | RT |  |  |  |  | 4     | 6.5E-1  | 1.0E0     |
| <input type="checkbox"/> | GOTERM_BP_FAT         | <a href="#">protein amino acid deacetylation</a>                                                             | RT |  |  |  |  | 4     | 7.7E-1  | 1.0E0     |
| <input type="checkbox"/> | GOTERM_BP_FAT         | <a href="#">regulation of transcription, DNA-dependent</a>                                                   | RT |  |  |  |  | 7     | 7.8E-1  | 1.0E0     |
| <input type="checkbox"/> | GOTERM_BP_FAT         | <a href="#">regulation of RNA metabolic process</a>                                                          | RT |  |  |  |  | 7     | 7.8E-1  | 1.0E0     |
| <input type="checkbox"/> | GOTERM_MF_FAT         | <a href="#">hydrolase activity, acting on carbon-nitrogen (but not peptide) bonds, in linear amides</a>      | RT |  |  |  |  | 5     | 7.9E-1  | 1.0E0     |
| <input type="checkbox"/> | GOTERM_BP_FAT         | <a href="#">gene silencing</a>                                                                               | RT |  |  |  |  | 4     | 8.7E-1  | 1.0E0     |
| <input type="checkbox"/> | GOTERM_BP_FAT         | <a href="#">negative regulation of macromolecule metabolic process</a>                                       | RT |  |  |  |  | 4     | 8.7E-1  | 1.0E0     |
| <input type="checkbox"/> | GOTERM_BP_FAT         | <a href="#">negative regulation of gene expression</a>                                                       | RT |  |  |  |  | 4     | 8.7E-1  | 1.0E0     |
| <input type="checkbox"/> | GOTERM_BP_FAT         | <a href="#">regulation of transcription</a>                                                                  | RT |  |  |  |  | 15    | 9.3E-1  | 1.0E0     |
|                          | Annotation Cluster 34 | Enrichment Score: 0.16                                                                                       |    |  |  |  |  | Count | P_Value | Benjamini |
| <input type="checkbox"/> | GOTERM_BP_FAT         | <a href="#">generation of precursor metabolites and energy</a>                                               | RT |  |  |  |  | 17    | 3.8E-1  | 1.0E0     |
| <input type="checkbox"/> | GOTERM_MF_FAT         | <a href="#">inorganic cation transmembrane transporter activity</a>                                          | RT |  |  |  |  | 12    | 4.8E-1  | 1.0E0     |
| <input type="checkbox"/> | GOTERM_CC_FAT         | <a href="#">proton-transporting two-sector ATPase complex, proton-transporting domain</a>                    | RT |  |  |  |  | 5     | 4.8E-1  | 1.0E0     |
| <input type="checkbox"/> | GOTERM_BP_FAT         | <a href="#">purine ribonucleotide metabolic process</a>                                                      | RT |  |  |  |  | 17    | 5.6E-1  | 1.0E0     |
| <input type="checkbox"/> | GOTERM_BP_FAT         | <a href="#">purine ribonucleotide biosynthetic process</a>                                                   | RT |  |  |  |  | 17    | 5.6E-1  | 1.0E0     |
| <input type="checkbox"/> | GOTERM_BP_FAT         | <a href="#">ribonucleotide biosynthetic process</a>                                                          | RT |  |  |  |  | 17    | 5.6E-1  | 1.0E0     |
| <input type="checkbox"/> | GOTERM_BP_FAT         | <a href="#">ribonucleotide metabolic process</a>                                                             | RT |  |  |  |  | 17    | 5.6E-1  | 1.0E0     |

|                          |                 |                                                                                                                |    |    |        |        |
|--------------------------|-----------------|----------------------------------------------------------------------------------------------------------------|----|----|--------|--------|
| <input type="checkbox"/> | GOTERM_BP_FAT   | <a href="#">transmembrane transport</a>                                                                        | RT | 13 | 5.7E-1 | 1.0E0  |
| <input type="checkbox"/> | GOTERM_BP_FAT   | <a href="#">purine nucleotide metabolic process</a>                                                            | RT | 18 | 5.8E-1 | 1.0E0  |
| <input type="checkbox"/> | GOTERM_BP_FAT   | <a href="#">nucleotide biosynthetic process</a>                                                                | RT | 23 | 5.8E-1 | 1.0E0  |
| <input type="checkbox"/> | GOTERM_MF_FAT   | <a href="#">di-, tri-valent inorganic cation transmembrane transporter activity</a>                            | RT | 3  | 6.1E-1 | 1.0E0  |
| <input type="checkbox"/> | GOTERM_MF_FAT   | <a href="#">primary active transmembrane transporter activity</a>                                              | RT | 18 | 6.1E-1 | 1.0E0  |
| <input type="checkbox"/> | GOTERM_MF_FAT   | <a href="#">P-P-bond-hydrolysis-driven transmembrane transporter activity</a>                                  | RT | 18 | 6.1E-1 | 1.0E0  |
| <input type="checkbox"/> | INTERPRO        | <a href="#">ATPase, P-type cation-transporter, N-terminal</a>                                                  | RT | 3  | 6.2E-1 | 1.0E0  |
| <input type="checkbox"/> | INTERPRO        | <a href="#">ATPase, P-type cation-transporter, C-terminal</a>                                                  | RT | 3  | 6.2E-1 | 1.0E0  |
| <input type="checkbox"/> | GOTERM_BP_FAT   | <a href="#">purine nucleoside triphosphate metabolic process</a>                                               | RT | 16 | 6.3E-1 | 1.0E0  |
| <input type="checkbox"/> | GOTERM_BP_FAT   | <a href="#">purine nucleoside triphosphate biosynthetic process</a>                                            | RT | 16 | 6.3E-1 | 1.0E0  |
| <input type="checkbox"/> | GOTERM_BP_FAT   | <a href="#">nucleoside triphosphate metabolic process</a>                                                      | RT | 16 | 6.3E-1 | 1.0E0  |
| <input type="checkbox"/> | GOTERM_BP_FAT   | <a href="#">nucleoside triphosphate biosynthetic process</a>                                                   | RT | 16 | 6.3E-1 | 1.0E0  |
| <input type="checkbox"/> | GOTERM_BP_FAT   | <a href="#">purine ribonucleoside triphosphate metabolic process</a>                                           | RT | 16 | 6.3E-1 | 1.0E0  |
| <input type="checkbox"/> | GOTERM_BP_FAT   | <a href="#">purine ribonucleoside triphosphate biosynthetic process</a>                                        | RT | 16 | 6.3E-1 | 1.0E0  |
| <input type="checkbox"/> | GOTERM_BP_FAT   | <a href="#">ribonucleoside triphosphate metabolic process</a>                                                  | RT | 16 | 6.3E-1 | 1.0E0  |
| <input type="checkbox"/> | GOTERM_BP_FAT   | <a href="#">ribonucleoside triphosphate biosynthetic process</a>                                               | RT | 16 | 6.3E-1 | 1.0E0  |
| <input type="checkbox"/> | GOTERM_CC_FAT   | <a href="#">proton-transporting V-type ATPase, V0 domain</a>                                                   | RT | 4  | 6.3E-1 | 1.0E0  |
| <input type="checkbox"/> | GOTERM_MF_FAT   | <a href="#">metal ion transmembrane transporter activity</a>                                                   | RT | 4  | 6.4E-1 | 1.0E0  |
| <input type="checkbox"/> | GOTERM_BP_FAT   | <a href="#">purine nucleotide biosynthetic process</a>                                                         | RT | 17 | 6.4E-1 | 1.0E0  |
| <input type="checkbox"/> | GOTERM_BP_FAT   | <a href="#">nitrogen compound biosynthetic process</a>                                                         | RT | 28 | 6.5E-1 | 1.0E0  |
| <input type="checkbox"/> | GOTERM_BP_FAT   | <a href="#">nucleobase, nucleoside and nucleotide biosynthetic process</a>                                     | RT | 24 | 6.6E-1 | 1.0E0  |
| <input type="checkbox"/> | GOTERM_BP_FAT   | <a href="#">nucleobase, nucleoside, nucleotide and nucleic acid biosynthetic process</a>                       | RT | 24 | 6.6E-1 | 1.0E0  |
| <input type="checkbox"/> | GOTERM_BP_FAT   | <a href="#">ion transport</a>                                                                                  | RT | 14 | 6.8E-1 | 1.0E0  |
| <input type="checkbox"/> | GOTERM_BP_FAT   | <a href="#">cation transport</a>                                                                               | RT | 14 | 6.8E-1 | 1.0E0  |
| <input type="checkbox"/> | INTERPRO        | <a href="#">ATPase, P-type, ATPase-associated region</a>                                                       | RT | 7  | 7.1E-1 | 1.0E0  |
| <input type="checkbox"/> | GOTERM_MF_FAT   | <a href="#">monovalent inorganic cation transmembrane transporter activity</a>                                 | RT | 9  | 7.2E-1 | 1.0E0  |
| <input type="checkbox"/> | GOTERM_MF_FAT   | <a href="#">hydrogen ion transmembrane transporter activity</a>                                                | RT | 9  | 7.2E-1 | 1.0E0  |
| <input type="checkbox"/> | GOTERM_MF_FAT   | <a href="#">ATPase activity, coupled to transmembrane movement of substances</a>                               | RT | 16 | 7.3E-1 | 1.0E0  |
| <input type="checkbox"/> | GOTERM_MF_FAT   | <a href="#">ATPase activity, coupled to movement of substances</a>                                             | RT | 16 | 7.3E-1 | 1.0E0  |
| <input type="checkbox"/> | GOTERM_BP_FAT   | <a href="#">ATP biosynthetic process</a>                                                                       | RT | 14 | 7.5E-1 | 1.0E0  |
| <input type="checkbox"/> | GOTERM_BP_FAT   | <a href="#">ATP metabolic process</a>                                                                          | RT | 14 | 7.5E-1 | 1.0E0  |
| <input type="checkbox"/> | GOTERM_BP_FAT   | <a href="#">ion transmembrane transport</a>                                                                    | RT | 8  | 7.8E-1 | 1.0E0  |
| <input type="checkbox"/> | GOTERM_MF_FAT   | <a href="#">cation-transporting ATPase activity</a>                                                            | RT | 6  | 7.9E-1 | 1.0E0  |
| <input type="checkbox"/> | GOTERM_MF_FAT   | <a href="#">ATPase activity, coupled to transmembrane movement of ions, phosphorylative mechanism</a>          | RT | 7  | 8.0E-1 | 1.0E0  |
| <input type="checkbox"/> | INTERPRO        | <a href="#">Haloacid dehalogenase-like hydrolase</a>                                                           | RT | 6  | 8.0E-1 | 1.0E0  |
| <input type="checkbox"/> | INTERPRO        | <a href="#">ATPase, P-type, K/Mg/Cd/Cu/Zn/Na/Ca/Na/H-transporter</a>                                           | RT | 7  | 8.1E-1 | 1.0E0  |
| <input type="checkbox"/> | GOTERM_MF_FAT   | <a href="#">ATPase activity, coupled to transmembrane movement of ions</a>                                     | RT | 11 | 8.2E-1 | 1.0E0  |
| <input type="checkbox"/> | GOTERM_MF_FAT   | <a href="#">hydrolase activity, acting on acid anhydrides, catalyzing transmembrane movement of substances</a> | RT | 16 | 8.5E-1 | 1.0E0  |
| <input type="checkbox"/> | GOTERM_BP_FAT   | <a href="#">hydrogen transport</a>                                                                             | RT | 8  | 8.5E-1 | 1.0E0  |
| <input type="checkbox"/> | GOTERM_BP_FAT   | <a href="#">proton transport</a>                                                                               | RT | 8  | 8.5E-1 | 1.0E0  |
| <input type="checkbox"/> | GOTERM_BP_FAT   | <a href="#">oxidative phosphorylation</a>                                                                      | RT | 7  | 8.5E-1 | 1.0E0  |
| <input type="checkbox"/> | GOTERM_BP_FAT   | <a href="#">ATP synthesis coupled proton transport</a>                                                         | RT | 7  | 8.5E-1 | 1.0E0  |
| <input type="checkbox"/> | GOTERM_BP_FAT   | <a href="#">energy coupled proton transport, down electrochemical gradient</a>                                 | RT | 7  | 8.5E-1 | 1.0E0  |
| <input type="checkbox"/> | KEGG_PATHWAY    | <a href="#">Oxidative phosphorylation</a>                                                                      | RT | 7  | 8.6E-1 | 1.0E0  |
| <input type="checkbox"/> | GOTERM_CC_FAT   | <a href="#">proton-transporting two-sector ATPase complex</a>                                                  | RT | 8  | 8.6E-1 | 1.0E0  |
| <input type="checkbox"/> | GOTERM_CC_FAT   | <a href="#">proton-transporting V-type ATPase complex</a>                                                      | RT | 5  | 8.7E-1 | 1.0E0  |
| <input type="checkbox"/> | GOTERM_BP_FAT   | <a href="#">monovalent inorganic cation transport</a>                                                          | RT | 8  | 9.0E-1 | 1.0E0  |
| <input type="checkbox"/> | SP_PIR_KEYWORDS | <a href="#">ion transport</a>                                                                                  | RT | 3  | 9.1E-1 | 9.9E-1 |
| <input type="checkbox"/> | INTERPRO        | <a href="#">ATPase, P-type phosphorylation site</a>                                                            | RT | 4  | 9.4E-1 | 1.0E0  |
| <input type="checkbox"/> | GOTERM_MF_FAT   | <a href="#">proton-transporting ATPase activity, rotational mechanism</a>                                      | RT | 3  | 9.7E-1 | 1.0E0  |

| <input type="checkbox"/> | Annotation Cluster    | Enrichment Score                                                             | Term                                                                            | RT | Count  | P_Value | Benjamini |
|--------------------------|-----------------------|------------------------------------------------------------------------------|---------------------------------------------------------------------------------|----|--------|---------|-----------|
| <input type="checkbox"/> | GOTERM_CC_FAT         | Annotation Cluster 35<br>Enrichment Score: 0.15                              | <a href="#">proton-transporting two-sector ATPase complex, catalytic domain</a> | RT | 3      | 9.9E-1  | 1.0E0     |
| <input type="checkbox"/> | GOTERM_MF_FAT         |                                                                              | <a href="#">protein kinase regulator activity</a>                               | RT | 5      | 6.6E-1  | 1.0E0     |
| <input type="checkbox"/> | GOTERM_MF_FAT         |                                                                              | <a href="#">kinase regulator activity</a>                                       | RT | 5      | 6.6E-1  | 1.0E0     |
| <input type="checkbox"/> | GOTERM_MF_FAT         |                                                                              | <a href="#">cAMP-dependent protein kinase regulator activity</a>                | RT | 3      | 7.9E-1  | 1.0E0     |
| <input type="checkbox"/> | GOTERM_CC_FAT         | Annotation Cluster 36<br>Enrichment Score: 0.15                              | <a href="#">endomembrane system</a>                                             | RT | 12     | 2.4E-1  | 1.0E0     |
| <input type="checkbox"/> | GOTERM_CC_FAT         |                                                                              | <a href="#">organelle membrane</a>                                              | RT | 8      | 4.5E-1  | 1.0E0     |
| <input type="checkbox"/> | GOTERM_CC_FAT         |                                                                              | <a href="#">coated membrane</a>                                                 | RT | 9      | 6.1E-1  | 1.0E0     |
| <input type="checkbox"/> | GOTERM_CC_FAT         |                                                                              | <a href="#">membrane coat</a>                                                   | RT | 9      | 6.1E-1  | 1.0E0     |
| <input type="checkbox"/> | GOTERM_CC_FAT         |                                                                              | <a href="#">transport vesicle membrane</a>                                      | RT | 4      | 6.3E-1  | 1.0E0     |
| <input type="checkbox"/> | GOTERM_CC_FAT         |                                                                              | <a href="#">transport vesicle</a>                                               | RT | 4      | 6.3E-1  | 1.0E0     |
| <input type="checkbox"/> | GOTERM_CC_FAT         |                                                                              | <a href="#">Golgi apparatus</a>                                                 | RT | 7      | 6.9E-1  | 1.0E0     |
| <input type="checkbox"/> | GOTERM_CC_FAT         |                                                                              | <a href="#">cytoplasmic vesicle part</a>                                        | RT | 4      | 7.8E-1  | 1.0E0     |
| <input type="checkbox"/> | GOTERM_CC_FAT         |                                                                              | <a href="#">coated vesicle membrane</a>                                         | RT | 4      | 7.8E-1  | 1.0E0     |
| <input type="checkbox"/> | GOTERM_CC_FAT         |                                                                              | <a href="#">coated vesicle</a>                                                  | RT | 4      | 7.8E-1  | 1.0E0     |
| <input type="checkbox"/> | GOTERM_CC_FAT         |                                                                              | <a href="#">cytoplasmic vesicle membrane</a>                                    | RT | 4      | 7.8E-1  | 1.0E0     |
| <input type="checkbox"/> | GOTERM_CC_FAT         |                                                                              | <a href="#">vesicle coat</a>                                                    | RT | 4      | 7.8E-1  | 1.0E0     |
| <input type="checkbox"/> | GOTERM_CC_FAT         |                                                                              | <a href="#">cytoplasmic vesicle</a>                                             | RT | 4      | 7.8E-1  | 1.0E0     |
| <input type="checkbox"/> | GOTERM_CC_FAT         |                                                                              | <a href="#">vesicle</a>                                                         | RT | 4      | 7.8E-1  | 1.0E0     |
| <input type="checkbox"/> | GOTERM_CC_FAT         |                                                                              | <a href="#">membrane-bounded vesicle</a>                                        | RT | 4      | 7.8E-1  | 1.0E0     |
| <input type="checkbox"/> | GOTERM_CC_FAT         |                                                                              | <a href="#">cytoplasmic membrane-bounded vesicle</a>                            | RT | 4      | 7.8E-1  | 1.0E0     |
| <input type="checkbox"/> | GOTERM_CC_FAT         |                                                                              | <a href="#">vesicle membrane</a>                                                | RT | 4      | 7.8E-1  | 1.0E0     |
| <input type="checkbox"/> | GOTERM_CC_FAT         |                                                                              | <a href="#">ER to Golgi transport vesicle</a>                                   | RT | 3      | 7.9E-1  | 1.0E0     |
| <input type="checkbox"/> | GOTERM_CC_FAT         |                                                                              | <a href="#">COPII vesicle coat</a>                                              | RT | 3      | 7.9E-1  | 1.0E0     |
| <input type="checkbox"/> | GOTERM_CC_FAT         |                                                                              | <a href="#">ER to Golgi transport vesicle membrane</a>                          | RT | 3      | 7.9E-1  | 1.0E0     |
| <input type="checkbox"/> | GOTERM_CC_FAT         |                                                                              | <a href="#">Golgi apparatus part</a>                                            | RT | 4      | 9.3E-1  | 1.0E0     |
| <input type="checkbox"/> | GOTERM_BP_FAT         |                                                                              | <a href="#">Golgi vesicle transport</a>                                         | RT | 3      | 9.4E-1  | 1.0E0     |
| <input type="checkbox"/> | GOTERM_BP_FAT         |                                                                              | <a href="#">ER to Golgi vesicle-mediated transport</a>                          | RT | 3      | 9.4E-1  | 1.0E0     |
| <input type="checkbox"/> | Annotation Cluster 37 |                                                                              | Enrichment Score: 0.15                                                          |    |        |         |           |
| <input type="checkbox"/> | INTERPRO              | <a href="#">Protein-tyrosine phosphatase, active site</a>                    | RT                                                                              | 5  | 5.1E-1 | 1.0E0   |           |
| <input type="checkbox"/> | INTERPRO              | <a href="#">Protein-tyrosine phosphatase</a>                                 | RT                                                                              | 4  | 6.5E-1 | 1.0E0   |           |
| <input type="checkbox"/> | INTERPRO              | <a href="#">Dual-specific/protein-tyrosine phosphatase, conserved region</a> | RT                                                                              | 4  | 6.5E-1 | 1.0E0   |           |
| <input type="checkbox"/> | GOTERM_BP_FAT         | <a href="#">dephosphorylation</a>                                            | RT                                                                              | 9  | 7.9E-1 | 1.0E0   |           |
| <input type="checkbox"/> | GOTERM_BP_FAT         | <a href="#">protein amino acid dephosphorylation</a>                         | RT                                                                              | 7  | 8.5E-1 | 1.0E0   |           |
| <input type="checkbox"/> | GOTERM_MF_FAT         | <a href="#">protein tyrosine phosphatase activity</a>                        | RT                                                                              | 4  | 8.8E-1 | 1.0E0   |           |
| <input type="checkbox"/> | Annotation Cluster 38 | Enrichment Score: 0.14                                                       |                                                                                 |    |        |         |           |
| <input type="checkbox"/> | GOTERM_MF_FAT         | <a href="#">calcium-dependent phospholipid binding</a>                       | RT                                                                              | 14 | 5.3E-1 | 1.0E0   |           |
| <input type="checkbox"/> | GOTERM_MF_FAT         | <a href="#">lipid binding</a>                                                | RT                                                                              | 22 | 5.3E-1 | 1.0E0   |           |
| <input type="checkbox"/> | INTERPRO              | <a href="#">Alpha gIardin</a>                                                | RT                                                                              | 8  | 6.2E-1 | 1.0E0   |           |
| <input type="checkbox"/> | GOTERM_MF_FAT         | <a href="#">calcium ion binding</a>                                          | RT                                                                              | 25 | 6.5E-1 | 1.0E0   |           |
| <input type="checkbox"/> | GOTERM_BP_FAT         | <a href="#">cytoskeleton organization</a>                                    | RT                                                                              | 9  | 7.9E-1 | 1.0E0   |           |
| <input type="checkbox"/> | INTERPRO              | <a href="#">Annexin repeat</a>                                               | RT                                                                              | 8  | 8.2E-1 | 1.0E0   |           |
| <input type="checkbox"/> | INTERPRO              | <a href="#">Annexin</a>                                                      | RT                                                                              | 9  | 8.2E-1 | 1.0E0   |           |
| <input type="checkbox"/> | SMART                 | <a href="#">ANX</a>                                                          | RT                                                                              | 8  | 8.3E-1 | 1.0E0   |           |
| <input type="checkbox"/> | SP_PIR_KEYWORDS       | <a href="#">annexin</a>                                                      | RT                                                                              | 9  | 8.4E-1 | 9.9E-1  |           |
| <input type="checkbox"/> | GOTERM_MF_FAT         | <a href="#">phospholipid binding</a>                                         | RT                                                                              | 14 | 8.8E-1 | 1.0E0   |           |
| <input type="checkbox"/> | Annotation Cluster 39 | Enrichment Score: 0.13                                                       |                                                                                 |    |        |         |           |
| <input type="checkbox"/> | GOTERM_MF_FAT         | <a href="#">endopeptidase activity</a>                                       | RT                                                                              | 29 | 3.8E-1 | 1.0E0   |           |
| <input type="checkbox"/> | GOTERM_MF_FAT         | <a href="#">peptidase activity, acting on L-amino acid peptides</a>          | RT                                                                              | 40 | 5.6E-1 | 1.0E0   |           |
| <input type="checkbox"/> | GOTERM_MF_FAT         | <a href="#">peptidase activity</a>                                           | RT                                                                              | 46 | 5.9E-1 | 1.0E0   |           |
| <input type="checkbox"/> | GOTERM_BP_FAT         | <a href="#">proteolysis</a>                                                  | RT                                                                              | 48 | 7.8E-1 | 1.0E0   |           |
| <input type="checkbox"/> | INTERPRO              | <a href="#">Peptidase C1A, papain C-terminal</a>                             | RT                                                                              | 15 | 8.1E-1 | 1.0E0   |           |
| <input type="checkbox"/> | INTERPRO              | <a href="#">Peptidase C1A, papain</a>                                        | RT                                                                              | 15 | 8.1E-1 | 1.0E0   |           |
| <input type="checkbox"/> | SMART                 | <a href="#">Pept_C1</a>                                                      | RT                                                                              | 15 | 8.3E-1 | 1.0E0   |           |
| <input type="checkbox"/> | GOTERM_MF_FAT         | <a href="#">cysteine-type endopeptidase activity</a>                         | RT                                                                              | 13 | 8.3E-1 | 1.0E0   |           |
| <input type="checkbox"/> | GOTERM_MF_FAT         | <a href="#">cysteine-type peptidase activity</a>                             | RT                                                                              | 16 | 8.5E-1 | 1.0E0   |           |



| <input type="checkbox"/> | Annotation      | Term                                                                               | RT | Bar | Count | P_Value | Benjamini |
|--------------------------|-----------------|------------------------------------------------------------------------------------|----|-----|-------|---------|-----------|
| <input type="checkbox"/> | INTERPRO        | <a href="#">Peptidase, cysteine peptidase active site</a>                          | RT |     | 16    | 8.6E-1  | 1.0E0     |
| <input type="checkbox"/> | SP_PIR_KEYWORDS | <a href="#">Protease</a>                                                           | RT |     | 19    | 9.0E-1  | 1.0E0     |
| <input type="checkbox"/> | SP_PIR_KEYWORDS | <a href="#">thiol protease</a>                                                     | RT |     | 5     | 9.4E-1  | 1.0E0     |
| Annotation Cluster 40    |                 | Enrichment Score: 0.13                                                             |    |     | Count | P_Value | Benjamini |
| <input type="checkbox"/> | KEGG_PATHWAY    | <a href="#">Mismatch repair</a>                                                    | RT |     | 9     | 6.0E-1  | 1.0E0     |
| <input type="checkbox"/> | KEGG_PATHWAY    | <a href="#">DNA replication</a>                                                    | RT |     | 12    | 7.4E-1  | 1.0E0     |
| <input type="checkbox"/> | KEGG_PATHWAY    | <a href="#">Nucleotide excision repair</a>                                         | RT |     | 8     | 9.1E-1  | 1.0E0     |
| Annotation Cluster 41    |                 | Enrichment Score: 0.13                                                             |    |     | Count | P_Value | Benjamini |
| <input type="checkbox"/> | SP_PIR_KEYWORDS | <a href="#">coiled coil</a>                                                        | RT |     | 4     | 4.6E-1  | 1.0E0     |
| <input type="checkbox"/> | INTERPRO        | <a href="#">ATPase associated with various cellular activities, AAA-5</a>          | RT |     | 5     | 5.1E-1  | 1.0E0     |
| <input type="checkbox"/> | COG_ONTOLOGY    | <a href="#">Cytoskeleton</a>                                                       | RT |     | 11    | 8.8E-1  | 1.0E0     |
| <input type="checkbox"/> | GOTERM_CC_FAT   | <a href="#">dynein complex</a>                                                     | RT |     | 6     | 9.2E-1  | 1.0E0     |
| <input type="checkbox"/> | INTERPRO        | <a href="#">Dynein heavy chain</a>                                                 | RT |     | 6     | 9.3E-1  | 1.0E0     |
| <input type="checkbox"/> | INTERPRO        | <a href="#">Dynein heavy chain, N-terminal region 2</a>                            | RT |     | 4     | 9.9E-1  | 1.0E0     |
| Annotation Cluster 42    |                 | Enrichment Score: 0.12                                                             |    |     | Count | P_Value | Benjamini |
| <input type="checkbox"/> | SP_PIR_KEYWORDS | <a href="#">magnesium</a>                                                          | RT |     | 9     | 4.1E-1  | 1.0E0     |
| <input type="checkbox"/> | GOTERM_BP_FAT   | <a href="#">dephosphorylation</a>                                                  | RT |     | 9     | 7.9E-1  | 1.0E0     |
| <input type="checkbox"/> | GOTERM_MF_FAT   | <a href="#">protein serine/threonine phosphatase activity</a>                      | RT |     | 3     | 7.9E-1  | 1.0E0     |
| <input type="checkbox"/> | INTERPRO        | <a href="#">Protein phosphatase 2C, N-terminal</a>                                 | RT |     | 4     | 8.0E-1  | 1.0E0     |
| <input type="checkbox"/> | INTERPRO        | <a href="#">Protein phosphatase 2C-related</a>                                     | RT |     | 4     | 8.0E-1  | 1.0E0     |
| <input type="checkbox"/> | INTERPRO        | <a href="#">Protein phosphatase 2C</a>                                             | RT |     | 4     | 8.0E-1  | 1.0E0     |
| <input type="checkbox"/> | INTERPRO        | <a href="#">Protein phosphatase 2C, manganese/magnesium aspartate binding site</a> | RT |     | 3     | 8.0E-1  | 1.0E0     |
| <input type="checkbox"/> | SMART           | <a href="#">PP2C_SIG</a>                                                           | RT |     | 4     | 8.0E-1  | 1.0E0     |
| <input type="checkbox"/> | SMART           | <a href="#">PP2Cc</a>                                                              | RT |     | 4     | 8.0E-1  | 1.0E0     |
| <input type="checkbox"/> | SP_PIR_KEYWORDS | <a href="#">protein phosphatase</a>                                                | RT |     | 3     | 8.1E-1  | 9.9E-1    |
| <input type="checkbox"/> | GOTERM_BP_FAT   | <a href="#">protein amino acid dephosphorylation</a>                               | RT |     | 7     | 8.5E-1  | 1.0E0     |
| <input type="checkbox"/> | GOTERM_CC_FAT   | <a href="#">protein serine/threonine phosphatase complex</a>                       | RT |     | 4     | 8.7E-1  | 1.0E0     |
| Annotation Cluster 43    |                 | Enrichment Score: 0.11                                                             |    |     | Count | P_Value | Benjamini |
| <input type="checkbox"/> | GOTERM_BP_FAT   | <a href="#">cellular protein complex assembly</a>                                  | RT |     | 8     | 4.4E-1  | 1.0E0     |
| <input type="checkbox"/> | GOTERM_BP_FAT   | <a href="#">protein complex biogenesis</a>                                         | RT |     | 8     | 6.9E-1  | 1.0E0     |
| <input type="checkbox"/> | GOTERM_BP_FAT   | <a href="#">protein complex assembly</a>                                           | RT |     | 8     | 6.9E-1  | 1.0E0     |
| <input type="checkbox"/> | GOTERM_BP_FAT   | <a href="#">protein polymerization</a>                                             | RT |     | 5     | 7.7E-1  | 1.0E0     |
| <input type="checkbox"/> | INTERPRO        | <a href="#">Tubulin</a>                                                            | RT |     | 5     | 8.0E-1  | 1.0E0     |
| <input type="checkbox"/> | INTERPRO        | <a href="#">Tubulin/FtsZ, GTPase domain</a>                                        | RT |     | 5     | 8.0E-1  | 1.0E0     |
| <input type="checkbox"/> | INTERPRO        | <a href="#">Tubulin, conserved site</a>                                            | RT |     | 5     | 8.0E-1  | 1.0E0     |
| <input type="checkbox"/> | PIR_SUPERFAMILY | PIRSF002306: tubulin                                                               | RT |     | 4     | 8.4E-1  | 1.0E0     |
| <input type="checkbox"/> | INTERPRO        | <a href="#">Tubulin/FtsZ, 2-layer sandwich domain</a>                              | RT |     | 4     | 8.9E-1  | 1.0E0     |
| <input type="checkbox"/> | GOTERM_MF_FAT   | <a href="#">GTPase activity</a>                                                    | RT |     | 8     | 9.5E-1  | 1.0E0     |
| <input type="checkbox"/> | INTERPRO        | <a href="#">Beta tubulin, autoregulation binding site</a>                          | RT |     | 3     | 9.5E-1  | 1.0E0     |
| Annotation Cluster 44    |                 | Enrichment Score: 0.11                                                             |    |     | Count | P_Value | Benjamini |
| <input type="checkbox"/> | GOTERM_BP_FAT   | <a href="#">glycerophospholipid metabolic process</a>                              | RT |     | 5     | 6.4E-1  | 1.0E0     |
| <input type="checkbox"/> | GOTERM_BP_FAT   | <a href="#">glycerolipid metabolic process</a>                                     | RT |     | 5     | 6.4E-1  | 1.0E0     |
| <input type="checkbox"/> | GOTERM_BP_FAT   | <a href="#">phosphoinositide metabolic process</a>                                 | RT |     | 5     | 6.4E-1  | 1.0E0     |
| <input type="checkbox"/> | GOTERM_BP_FAT   | <a href="#">phospholipid metabolic process</a>                                     | RT |     | 7     | 7.8E-1  | 1.0E0     |
| <input type="checkbox"/> | GOTERM_BP_FAT   | <a href="#">organophosphate metabolic process</a>                                  | RT |     | 7     | 8.5E-1  | 1.0E0     |
| <input type="checkbox"/> | GOTERM_BP_FAT   | <a href="#">phospholipid biosynthetic process</a>                                  | RT |     | 4     | 8.7E-1  | 1.0E0     |
| <input type="checkbox"/> | GOTERM_MF_FAT   | <a href="#">inositol or phosphatidylinositol kinase activity</a>                   | RT |     | 3     | 8.9E-1  | 1.0E0     |
| <input type="checkbox"/> | GOTERM_BP_FAT   | <a href="#">lipid biosynthetic process</a>                                         | RT |     | 7     | 9.1E-1  | 1.0E0     |
| Annotation Cluster 45    |                 | Enrichment Score: 0.11                                                             |    |     | Count | P_Value | Benjamini |
| <input type="checkbox"/> | GOTERM_BP_FAT   | <a href="#">cell cycle</a>                                                         | RT |     | 5     | 7.7E-1  | 1.0E0     |
| <input type="checkbox"/> | GOTERM_BP_FAT   | <a href="#">M phase</a>                                                            | RT |     | 4     | 7.7E-1  | 1.0E0     |
| <input type="checkbox"/> | GOTERM_BP_FAT   | <a href="#">cell cycle process</a>                                                 | RT |     | 4     | 7.7E-1  | 1.0E0     |
| <input type="checkbox"/> | GOTERM_BP_FAT   | <a href="#">cell cycle phase</a>                                                   | RT |     | 4     | 7.7E-1  | 1.0E0     |
| <input type="checkbox"/> | GOTERM_BP_FAT   | <a href="#">organelle fission</a>                                                  | RT |     | 3     | 7.8E-1  | 1.0E0     |
| <input type="checkbox"/> | GOTERM_BP_FAT   | <a href="#">mitosis</a>                                                            | RT |     | 3     | 7.8E-1  | 1.0E0     |
| <input type="checkbox"/> | GOTERM_BP_FAT   | <a href="#">mitotic cell cycle</a>                                                 | RT |     | 3     | 7.8E-1  | 1.0E0     |
| <input type="checkbox"/> | GOTERM_BP_FAT   | <a href="#">M phase of mitotic cell cycle</a>                                      | RT |     | 3     | 7.8E-1  | 1.0E0     |

| <input type="checkbox"/> |                       |                                                                               |    |  |  |  |  |       |         |           |        |
|--------------------------|-----------------------|-------------------------------------------------------------------------------|----|--|--|--|--|-------|---------|-----------|--------|
| <input type="checkbox"/> |                       |                                                                               |    |  |  |  |  |       |         |           |        |
| <input type="checkbox"/> | GOTERM_BP_FAT         | <a href="#">nuclear division</a>                                              | RT |  |  |  |  |       | 3       | 7.8E-1    | 1.0E0  |
|                          | Annotation Cluster 46 | Enrichment Score: 0.11                                                        |    |  |  |  |  | Count | P_Value | Benjamini |        |
| <input type="checkbox"/> | GOTERM_BP_FAT         | <a href="#">rRNA metabolic process</a>                                        | RT |  |  |  |  |       | 8       | 6.9E-1    | 1.0E0  |
| <input type="checkbox"/> | GOTERM_BP_FAT         | <a href="#">rRNA processing</a>                                               | RT |  |  |  |  |       | 8       | 6.9E-1    | 1.0E0  |
| <input type="checkbox"/> | GOTERM_BP_FAT         | <a href="#">ncRNA processing</a>                                              | RT |  |  |  |  |       | 16      | 7.7E-1    | 1.0E0  |
| <input type="checkbox"/> | GOTERM_BP_FAT         | <a href="#">ribosome biogenesis</a>                                           | RT |  |  |  |  |       | 11      | 8.0E-1    | 1.0E0  |
| <input type="checkbox"/> | GOTERM_BP_FAT         | <a href="#">ribonucleoprotein complex biogenesis</a>                          | RT |  |  |  |  |       | 11      | 8.0E-1    | 1.0E0  |
| <input type="checkbox"/> | GOTERM_BP_FAT         | <a href="#">tRNA processing</a>                                               | RT |  |  |  |  |       | 9       | 8.5E-1    | 1.0E0  |
| <input type="checkbox"/> | GOTERM_BP_FAT         | <a href="#">RNA processing</a>                                                | RT |  |  |  |  |       | 23      | 9.2E-1    | 1.0E0  |
|                          | Annotation Cluster 47 | Enrichment Score: 0.1                                                         |    |  |  |  |  | Count | P_Value | Benjamini |        |
| <input type="checkbox"/> | INTERPRO              | <a href="#">Chaperonin TCP-1, conserved site</a>                              | RT |  |  |  |  |       | 6       | 6.9E-1    | 1.0E0  |
| <input type="checkbox"/> | SP_PIR_KEYWORDS       | <a href="#">cytoplasm</a>                                                     | RT |  |  |  |  |       | 11      | 7.1E-1    | 9.9E-1 |
| <input type="checkbox"/> | PIR_SUPERFAMILY       | PIRSF002584: molecular chaperone t-complex-type                               | RT |  |  |  |  |       | 5       | 7.3E-1    | 1.0E0  |
| <input type="checkbox"/> | GOTERM_MF_FAT         | <a href="#">unfolded protein binding</a>                                      | RT |  |  |  |  |       | 12      | 7.6E-1    | 1.0E0  |
| <input type="checkbox"/> | INTERPRO              | <a href="#">Chaperone, tailless complex polypeptide 1</a>                     | RT |  |  |  |  |       | 5       | 8.0E-1    | 1.0E0  |
| <input type="checkbox"/> | INTERPRO              | <a href="#">Chaperonin Cpn60/TCP-1</a>                                        | RT |  |  |  |  |       | 5       | 8.8E-1    | 1.0E0  |
| <input type="checkbox"/> | SP_PIR_KEYWORDS       | <a href="#">Chaperone</a>                                                     | RT |  |  |  |  |       | 5       | 9.8E-1    | 1.0E0  |
|                          | Annotation Cluster 48 | Enrichment Score: 0.1                                                         |    |  |  |  |  | Count | P_Value | Benjamini |        |
| <input type="checkbox"/> | GOTERM_BP_FAT         | <a href="#">cellular response to stress</a>                                   | RT |  |  |  |  |       | 12      | 7.3E-1    | 1.0E0  |
| <input type="checkbox"/> | GOTERM_BP_FAT         | <a href="#">DNA repair</a>                                                    | RT |  |  |  |  |       | 11      | 8.0E-1    | 1.0E0  |
| <input type="checkbox"/> | GOTERM_BP_FAT         | <a href="#">response to DNA damage stimulus</a>                               | RT |  |  |  |  |       | 11      | 8.0E-1    | 1.0E0  |
| <input type="checkbox"/> | GOTERM_BP_FAT         | <a href="#">DNA metabolic process</a>                                         | RT |  |  |  |  |       | 31      | 8.6E-1    | 1.0E0  |
|                          | Annotation Cluster 49 | Enrichment Score: 0.09                                                        |    |  |  |  |  | Count | P_Value | Benjamini |        |
| <input type="checkbox"/> | GOTERM_MF_FAT         | <a href="#">transferase activity, transferring nitrogenous groups</a>         | RT |  |  |  |  |       | 5       | 6.6E-1    | 1.0E0  |
| <input type="checkbox"/> | GOTERM_MF_FAT         | <a href="#">transaminase activity</a>                                         | RT |  |  |  |  |       | 3       | 8.9E-1    | 1.0E0  |
| <input type="checkbox"/> | SP_PIR_KEYWORDS       | <a href="#">Aminotransferase</a>                                              | RT |  |  |  |  |       | 3       | 9.1E-1    | 9.9E-1 |
|                          | Annotation Cluster 50 | Enrichment Score: 0.09                                                        |    |  |  |  |  | Count | P_Value | Benjamini |        |
| <input type="checkbox"/> | SP_PIR_KEYWORDS       | <a href="#">heme</a>                                                          | RT |  |  |  |  |       | 4       | 6.7E-1    | 9.9E-1 |
| <input type="checkbox"/> | INTERPRO              | <a href="#">Cytochrome b5, heme-binding site</a>                              | RT |  |  |  |  |       | 3       | 8.0E-1    | 1.0E0  |
| <input type="checkbox"/> | GOTERM_MF_FAT         | <a href="#">heme binding</a>                                                  | RT |  |  |  |  |       | 4       | 8.8E-1    | 1.0E0  |
| <input type="checkbox"/> | GOTERM_MF_FAT         | <a href="#">tetrapyrrole binding</a>                                          | RT |  |  |  |  |       | 4       | 8.8E-1    | 1.0E0  |
| <input type="checkbox"/> | INTERPRO              | <a href="#">Cytochrome b5</a>                                                 | RT |  |  |  |  |       | 3       | 9.0E-1    | 1.0E0  |
|                          | Annotation Cluster 51 | Enrichment Score: 0.08                                                        |    |  |  |  |  | Count | P_Value | Benjamini |        |
| <input type="checkbox"/> | INTERPRO              | <a href="#">EGF-like, type 3</a>                                              | RT |  |  |  |  |       | 19      | 6.6E-1    | 1.0E0  |
| <input type="checkbox"/> | INTERPRO              | <a href="#">EGF-like, laminin</a>                                             | RT |  |  |  |  |       | 13      | 9.3E-1    | 1.0E0  |
| <input type="checkbox"/> | SMART                 | <a href="#">EGF_Lam</a>                                                       | RT |  |  |  |  |       | 13      | 9.4E-1    | 1.0E0  |
|                          | Annotation Cluster 52 | Enrichment Score: 0.06                                                        |    |  |  |  |  | Count | P_Value | Benjamini |        |
| <input type="checkbox"/> | INTERPRO              | <a href="#">EF-HAND 1</a>                                                     | RT |  |  |  |  |       | 13      | 5.3E-1    | 1.0E0  |
| <input type="checkbox"/> | INTERPRO              | <a href="#">EF-HAND 2</a>                                                     | RT |  |  |  |  |       | 9       | 8.8E-1    | 1.0E0  |
| <input type="checkbox"/> | SP_PIR_KEYWORDS       | <a href="#">calcium</a>                                                       | RT |  |  |  |  |       | 8       | 8.9E-1    | 1.0E0  |
| <input type="checkbox"/> | INTERPRO              | <a href="#">EF hand</a>                                                       | RT |  |  |  |  |       | 5       | 9.6E-1    | 1.0E0  |
| <input type="checkbox"/> | INTERPRO              | <a href="#">Calcium-binding EF-hand</a>                                       | RT |  |  |  |  |       | 5       | 9.6E-1    | 1.0E0  |
| <input type="checkbox"/> | SMART                 | <a href="#">EFh</a>                                                           | RT |  |  |  |  |       | 5       | 9.7E-1    | 1.0E0  |
| <input type="checkbox"/> | INTERPRO              | <a href="#">EF-Hand type</a>                                                  | RT |  |  |  |  |       | 8       | 9.7E-1    | 1.0E0  |
|                          | Annotation Cluster 53 | Enrichment Score: 0.06                                                        |    |  |  |  |  | Count | P_Value | Benjamini |        |
| <input type="checkbox"/> | GOTERM_BP_FAT         | <a href="#">ncRNA metabolic process</a>                                       | RT |  |  |  |  |       | 28      | 8.0E-1    | 1.0E0  |
| <input type="checkbox"/> | GOTERM_BP_FAT         | <a href="#">tRNA aminoacylation for protein translation</a>                   | RT |  |  |  |  |       | 12      | 8.0E-1    | 1.0E0  |
| <input type="checkbox"/> | GOTERM_MF_FAT         | <a href="#">aminoacyl-tRNA ligase activity</a>                                | RT |  |  |  |  |       | 13      | 8.3E-1    | 1.0E0  |
| <input type="checkbox"/> | GOTERM_MF_FAT         | <a href="#">ligase activity, forming carbon-oxygen bonds</a>                  | RT |  |  |  |  |       | 13      | 8.3E-1    | 1.0E0  |
| <input type="checkbox"/> | GOTERM_MF_FAT         | <a href="#">ligase activity, forming aminoacyl-tRNA and related compounds</a> | RT |  |  |  |  |       | 13      | 8.3E-1    | 1.0E0  |
| <input type="checkbox"/> | GOTERM_BP_FAT         | <a href="#">tRNA metabolic process</a>                                        | RT |  |  |  |  |       | 21      | 8.5E-1    | 1.0E0  |
| <input type="checkbox"/> | GOTERM_BP_FAT         | <a href="#">amino acid activation</a>                                         | RT |  |  |  |  |       | 12      | 8.6E-1    | 1.0E0  |
| <input type="checkbox"/> | GOTERM_BP_FAT         | <a href="#">tRNA aminoacylation</a>                                           | RT |  |  |  |  |       | 12      | 8.6E-1    | 1.0E0  |
| <input type="checkbox"/> | KEGG_PATHWAY          | <a href="#">Aminoacyl-tRNA biosynthesis</a>                                   | RT |  |  |  |  |       | 11      | 8.7E-1    | 1.0E0  |
| <input type="checkbox"/> | SP_PIR_KEYWORDS       | <a href="#">Aminoacyl-tRNA synthetase</a>                                     | RT |  |  |  |  |       | 12      | 9.0E-1    | 1.0E0  |
| <input type="checkbox"/> | INTERPRO              | <a href="#">Aminoacyl-tRNA synthetase, class II, conserved region</a>         | RT |  |  |  |  |       | 4       | 9.7E-1    | 1.0E0  |
| <input type="checkbox"/> | SP_PIR_KEYWORDS       | <a href="#">ligase</a>                                                        | RT |  |  |  |  |       | 25      | 9.9E-1    | 1.0E0  |

|                          | Annotation Cluster    | Enrichment Score                                                                        |    |  | Count | P_Value | Benjamini |
|--------------------------|-----------------------|-----------------------------------------------------------------------------------------|----|--|-------|---------|-----------|
| <input type="checkbox"/> | Annotation Cluster 54 | Enrichment Score: 0.06                                                                  |    |  |       |         |           |
| <input type="checkbox"/> | GOTERM_BP_FAT         | <a href="#">dephosphorylation</a>                                                       | RT |  | 9     | 7.9E-1  | 1.0E0     |
| <input type="checkbox"/> | GOTERM_BP_FAT         | <a href="#">protein amino acid dephosphorylation</a>                                    | RT |  | 7     | 8.5E-1  | 1.0E0     |
| <input type="checkbox"/> | GOTERM_MF_FAT         | <a href="#">protein tyrosine/serine/threonine phosphatase activity</a>                  | RT |  | 3     | 8.9E-1  | 1.0E0     |
| <input type="checkbox"/> | INTERPRO              | <a href="#">Protein-tyrosine phosphatase, dual specificity</a>                          | RT |  | 3     | 9.0E-1  | 1.0E0     |
| <input type="checkbox"/> | INTERPRO              | <a href="#">Dual specificity phosphatase, catalytic domain</a>                          | RT |  | 3     | 9.0E-1  | 1.0E0     |
| <input type="checkbox"/> | Annotation Cluster 55 | Enrichment Score: 0.06                                                                  |    |  |       |         |           |
| <input type="checkbox"/> | INTERPRO              | <a href="#">Myb transcription factor</a>                                                | RT |  | 3     | 8.0E-1  | 1.0E0     |
| <input type="checkbox"/> | INTERPRO              | <a href="#">Myb-type HTH DNA-binding domain</a>                                         | RT |  | 3     | 8.0E-1  | 1.0E0     |
| <input type="checkbox"/> | INTERPRO              | <a href="#">Myb_DNA-binding</a>                                                         | RT |  | 3     | 9.0E-1  | 1.0E0     |
| <input type="checkbox"/> | INTERPRO              | <a href="#">SANT_DNA-binding</a>                                                        | RT |  | 5     | 9.3E-1  | 1.0E0     |
| <input type="checkbox"/> | SMART                 | <a href="#">SANT</a>                                                                    | RT |  | 5     | 9.4E-1  | 1.0E0     |
| <input type="checkbox"/> | Annotation Cluster 56 | Enrichment Score: 0.05                                                                  |    |  |       |         |           |
| <input type="checkbox"/> | INTERPRO              | <a href="#">Na+ driven multidrug efflux pump</a>                                        | RT |  | 3     | 8.0E-1  | 1.0E0     |
| <input type="checkbox"/> | GOTERM_BP_FAT         | <a href="#">multidrug transport</a>                                                     | RT |  | 3     | 8.9E-1  | 1.0E0     |
| <input type="checkbox"/> | GOTERM_BP_FAT         | <a href="#">response to drug</a>                                                        | RT |  | 3     | 8.9E-1  | 1.0E0     |
| <input type="checkbox"/> | GOTERM_BP_FAT         | <a href="#">drug transport</a>                                                          | RT |  | 3     | 8.9E-1  | 1.0E0     |
| <input type="checkbox"/> | GOTERM_MF_FAT         | <a href="#">drug transporter activity</a>                                               | RT |  | 3     | 8.9E-1  | 1.0E0     |
| <input type="checkbox"/> | INTERPRO              | <a href="#">Multi antimicrobial extrusion protein MatE</a>                              | RT |  | 3     | 9.0E-1  | 1.0E0     |
| <input type="checkbox"/> | GOTERM_MF_FAT         | <a href="#">antiporter activity</a>                                                     | RT |  | 3     | 9.5E-1  | 1.0E0     |
| <input type="checkbox"/> | Annotation Cluster 57 | Enrichment Score: 0.05                                                                  |    |  |       |         |           |
| <input type="checkbox"/> | GOTERM_BP_FAT         | <a href="#">vitamin metabolic process</a>                                               | RT |  | 3     | 8.9E-1  | 1.0E0     |
| <input type="checkbox"/> | GOTERM_BP_FAT         | <a href="#">water-soluble vitamin metabolic process</a>                                 | RT |  | 3     | 8.9E-1  | 1.0E0     |
| <input type="checkbox"/> | GOTERM_BP_FAT         | <a href="#">water-soluble vitamin biosynthetic process</a>                              | RT |  | 3     | 8.9E-1  | 1.0E0     |
| <input type="checkbox"/> | GOTERM_BP_FAT         | <a href="#">vitamin biosynthetic process</a>                                            | RT |  | 3     | 8.9E-1  | 1.0E0     |
| <input type="checkbox"/> | Annotation Cluster 58 | Enrichment Score: 0.05                                                                  |    |  |       |         |           |
| <input type="checkbox"/> | INTERPRO              | <a href="#">Thioredoxin domain</a>                                                      | RT |  | 4     | 8.0E-1  | 1.0E0     |
| <input type="checkbox"/> | INTERPRO              | <a href="#">Thioredoxin fold</a>                                                        | RT |  | 12    | 8.4E-1  | 1.0E0     |
| <input type="checkbox"/> | GOTERM_BP_FAT         | <a href="#">cellular homeostasis</a>                                                    | RT |  | 10    | 8.6E-1  | 1.0E0     |
| <input type="checkbox"/> | INTERPRO              | <a href="#">Thioredoxin-like</a>                                                        | RT |  | 7     | 8.8E-1  | 1.0E0     |
| <input type="checkbox"/> | GOTERM_MF_FAT         | <a href="#">antioxidant activity</a>                                                    | RT |  | 4     | 8.8E-1  | 1.0E0     |
| <input type="checkbox"/> | INTERPRO              | <a href="#">Thioredoxin-like subdomain</a>                                              | RT |  | 3     | 9.0E-1  | 1.0E0     |
| <input type="checkbox"/> | GOTERM_BP_FAT         | <a href="#">homeostatic process</a>                                                     | RT |  | 10    | 9.0E-1  | 1.0E0     |
| <input type="checkbox"/> | GOTERM_BP_FAT         | <a href="#">cell redox homeostasis</a>                                                  | RT |  | 9     | 9.0E-1  | 1.0E0     |
| <input type="checkbox"/> | INTERPRO              | <a href="#">Alkyl hydroperoxide reductase/ Thiol specific antioxidant/ Mal allergen</a> | RT |  | 3     | 9.5E-1  | 1.0E0     |
| <input type="checkbox"/> | INTERPRO              | <a href="#">Thioredoxin core</a>                                                        | RT |  | 3     | 9.8E-1  | 1.0E0     |
| <input type="checkbox"/> | Annotation Cluster 59 | Enrichment Score: 0.05                                                                  |    |  |       |         |           |
| <input type="checkbox"/> | GOTERM_CC_FAT         | <a href="#">membrane-enclosed lumen</a>                                                 | RT |  | 3     | 8.9E-1  | 1.0E0     |
| <input type="checkbox"/> | GOTERM_CC_FAT         | <a href="#">organelle lumen</a>                                                         | RT |  | 3     | 8.9E-1  | 1.0E0     |
| <input type="checkbox"/> | GOTERM_CC_FAT         | <a href="#">nuclear lumen</a>                                                           | RT |  | 3     | 8.9E-1  | 1.0E0     |
| <input type="checkbox"/> | GOTERM_CC_FAT         | <a href="#">intracellular organelle lumen</a>                                           | RT |  | 3     | 8.9E-1  | 1.0E0     |
| <input type="checkbox"/> | Annotation Cluster 60 | Enrichment Score: 0.05                                                                  |    |  |       |         |           |
| <input type="checkbox"/> | GOTERM_BP_FAT         | <a href="#">carboxylic acid biosynthetic process</a>                                    | RT |  | 4     | 8.7E-1  | 1.0E0     |
| <input type="checkbox"/> | GOTERM_BP_FAT         | <a href="#">organic acid biosynthetic process</a>                                       | RT |  | 4     | 8.7E-1  | 1.0E0     |
| <input type="checkbox"/> | GOTERM_BP_FAT         | <a href="#">cellular amino acid biosynthetic process</a>                                | RT |  | 3     | 8.9E-1  | 1.0E0     |
| <input type="checkbox"/> | GOTERM_BP_FAT         | <a href="#">amine biosynthetic process</a>                                              | RT |  | 3     | 9.4E-1  | 1.0E0     |
| <input type="checkbox"/> | Annotation Cluster 61 | Enrichment Score: 0.05                                                                  |    |  |       |         |           |
| <input type="checkbox"/> | INTERPRO              | <a href="#">von Willebrand factor, type A</a>                                           | RT |  | 4     | 8.9E-1  | 1.0E0     |
| <input type="checkbox"/> | SMART                 | <a href="#">VWA</a>                                                                     | RT |  | 4     | 8.9E-1  | 1.0E0     |
| <input type="checkbox"/> | INTERPRO              | <a href="#">Copine</a>                                                                  | RT |  | 3     | 9.0E-1  | 1.0E0     |
| <input type="checkbox"/> | Annotation Cluster 62 | Enrichment Score: 0.05                                                                  |    |  |       |         |           |
| <input type="checkbox"/> | GOTERM_CC_FAT         | <a href="#">cytoskeleton</a>                                                            | RT |  | 30    | 7.5E-1  | 1.0E0     |
| <input type="checkbox"/> | GOTERM_CC_FAT         | <a href="#">microtubule</a>                                                             | RT |  | 18    | 8.0E-1  | 1.0E0     |
| <input type="checkbox"/> | GOTERM_CC_FAT         | <a href="#">cytoskeletal part</a>                                                       | RT |  | 28    | 8.3E-1  | 1.0E0     |
| <input type="checkbox"/> | GOTERM_CC_FAT         | <a href="#">microtubule cytoskeleton</a>                                                | RT |  | 28    | 8.3E-1  | 1.0E0     |
| <input type="checkbox"/> | SP_PIR_KEYWORDS       | <a href="#">microtubule</a>                                                             | RT |  | 17    | 8.9E-1  | 1.0E0     |
| <input type="checkbox"/> | GOTERM_BP_FAT         | <a href="#">microtubule-based process</a>                                               | RT |  | 27    | 9.2E-1  | 1.0E0     |

|                          |                       |                                                                      |    |  |       |         |           |
|--------------------------|-----------------------|----------------------------------------------------------------------|----|--|-------|---------|-----------|
| <input type="checkbox"/> | GOTERM_MF_FAT         | <a href="#">motor activity</a>                                       | RT |  | 21    | 9.3E-1  | 1.0EO     |
| <input type="checkbox"/> | GOTERM_MF_FAT         | <a href="#">microtubule motor activity</a>                           | RT |  | 21    | 9.3E-1  | 1.0EO     |
| <input type="checkbox"/> | SP_PIR_KEYWORDS       | <a href="#">motor protein</a>                                        | RT |  | 12    | 9.4E-1  | 1.0EO     |
| <input type="checkbox"/> | GOTERM_BP_FAT         | <a href="#">microtubule-based movement</a>                           | RT |  | 23    | 9.4E-1  | 1.0EO     |
| <input type="checkbox"/> | INTERPRO              | <a href="#">Kinesin_motor region</a>                                 | RT |  | 13    | 9.7E-1  | 1.0EO     |
| <input type="checkbox"/> | INTERPRO              | <a href="#">Kinesin_motor region, conserved site</a>                 | RT |  | 8     | 9.7E-1  | 1.0EO     |
| <input type="checkbox"/> | SMART                 | <a href="#">K1Sc</a>                                                 | RT |  | 13    | 9.7E-1  | 1.0EO     |
|                          | Annotation Cluster 63 | Enrichment Score: 0.05                                               |    |  | Count | P_Value | Benjamini |
| <input type="checkbox"/> | GOTERM_BP_FAT         | <a href="#">cofactor metabolic process</a>                           | RT |  | 7     | 7.8E-1  | 1.0EO     |
| <input type="checkbox"/> | GOTERM_BP_FAT         | <a href="#">cofactor biosynthetic process</a>                        | RT |  | 5     | 8.6E-1  | 1.0EO     |
| <input type="checkbox"/> | GOTERM_BP_FAT         | <a href="#">coenzyme metabolic process</a>                           | RT |  | 5     | 9.2E-1  | 1.0EO     |
| <input type="checkbox"/> | GOTERM_BP_FAT         | <a href="#">pyridine nucleotide metabolic process</a>                | RT |  | 3     | 9.4E-1  | 1.0EO     |
| <input type="checkbox"/> | GOTERM_BP_FAT         | <a href="#">oxidoreduction coenzyme metabolic process</a>            | RT |  | 3     | 9.4E-1  | 1.0EO     |
| <input type="checkbox"/> | GOTERM_BP_FAT         | <a href="#">coenzyme biosynthetic process</a>                        | RT |  | 3     | 9.7E-1  | 1.0EO     |
|                          | Annotation Cluster 64 | Enrichment Score: 0.04                                               |    |  | Count | P_Value | Benjamini |
| <input type="checkbox"/> | GOTERM_BP_FAT         | <a href="#">RNA-dependent DNA replication</a>                        | RT |  | 4     | 8.7E-1  | 1.0EO     |
| <input type="checkbox"/> | INTERPRO              | <a href="#">RNA-directed DNA polymerase (reverse transcriptase)</a>  | RT |  | 4     | 8.9E-1  | 1.0EO     |
| <input type="checkbox"/> | GOTERM_MF_FAT         | <a href="#">RNA-directed DNA polymerase activity</a>                 | RT |  | 11    | 9.6E-1  | 1.0EO     |
|                          | Annotation Cluster 65 | Enrichment Score: 0.04                                               |    |  | Count | P_Value | Benjamini |
| <input type="checkbox"/> | GOTERM_BP_FAT         | <a href="#">lipid transport</a>                                      | RT |  | 3     | 8.9E-1  | 1.0EO     |
| <input type="checkbox"/> | GOTERM_BP_FAT         | <a href="#">lipid localization</a>                                   | RT |  | 3     | 8.9E-1  | 1.0EO     |
| <input type="checkbox"/> | GOTERM_MF_FAT         | <a href="#">lipid transporter activity</a>                           | RT |  | 3     | 9.5E-1  | 1.0EO     |
|                          | Annotation Cluster 66 | Enrichment Score: 0.04                                               |    |  | Count | P_Value | Benjamini |
| <input type="checkbox"/> | GOTERM_MF_FAT         | <a href="#">ubiquitin-protein ligase activity</a>                    | RT |  | 4     | 6.4E-1  | 1.0EO     |
| <input type="checkbox"/> | GOTERM_MF_FAT         | <a href="#">ligase activity, forming carbon-nitrogen bonds</a>       | RT |  | 16    | 9.2E-1  | 1.0EO     |
| <input type="checkbox"/> | GOTERM_MF_FAT         | <a href="#">acid-amino acid ligase activity</a>                      | RT |  | 13    | 9.4E-1  | 1.0EO     |
| <input type="checkbox"/> | GOTERM_MF_FAT         | <a href="#">small conjugating protein ligase activity</a>            | RT |  | 6     | 9.5E-1  | 1.0EO     |
| <input type="checkbox"/> | KEGG_PATHWAY          | <a href="#">Ubiquitin mediated proteolysis</a>                       | RT |  | 5     | 9.6E-1  | 1.0EO     |
| <input type="checkbox"/> | INTERPRO              | <a href="#">Ubiquitin-conjugating enzyme/RWD-like</a>                | RT |  | 5     | 9.8E-1  | 1.0EO     |
| <input type="checkbox"/> | INTERPRO              | <a href="#">Ubiquitin-conjugating enzyme, E2</a>                     | RT |  | 5     | 9.8E-1  | 1.0EO     |
| <input type="checkbox"/> | SMART                 | <a href="#">UBCc</a>                                                 | RT |  | 5     | 9.8E-1  | 1.0EO     |
| <input type="checkbox"/> | SP_PIR_KEYWORDS       | <a href="#">ligase</a>                                               | RT |  | 25    | 9.9E-1  | 1.0EO     |
|                          | Annotation Cluster 67 | Enrichment Score: 0.02                                               |    |  | Count | P_Value | Benjamini |
| <input type="checkbox"/> | GOTERM_CC_FAT         | <a href="#">ribonucleoprotein complex</a>                            | RT |  | 53    | 8.8E-1  | 1.0EO     |
| <input type="checkbox"/> | GOTERM_CC_FAT         | <a href="#">non-membrane-bounded organelle</a>                       | RT |  | 85    | 9.2E-1  | 1.0EO     |
| <input type="checkbox"/> | GOTERM_CC_FAT         | <a href="#">intracellular non-membrane-bounded organelle</a>         | RT |  | 85    | 9.2E-1  | 1.0EO     |
| <input type="checkbox"/> | GOTERM_MF_FAT         | <a href="#">structural molecule activity</a>                         | RT |  | 42    | 9.5E-1  | 1.0EO     |
| <input type="checkbox"/> | KEGG_PATHWAY          | <a href="#">Ribosome</a>                                             | RT |  | 34    | 9.5E-1  | 1.0EO     |
| <input type="checkbox"/> | GOTERM_MF_FAT         | <a href="#">structural constituent of ribosome</a>                   | RT |  | 34    | 9.6E-1  | 1.0EO     |
| <input type="checkbox"/> | GOTERM_BP_FAT         | <a href="#">translation</a>                                          | RT |  | 56    | 9.6E-1  | 1.0EO     |
| <input type="checkbox"/> | GOTERM_CC_FAT         | <a href="#">ribosome</a>                                             | RT |  | 37    | 9.7E-1  | 1.0EO     |
| <input type="checkbox"/> | SP_PIR_KEYWORDS       | <a href="#">ribosomal protein</a>                                    | RT |  | 36    | 9.7E-1  | 1.0EO     |
|                          | Annotation Cluster 68 | Enrichment Score: 0.02                                               |    |  | Count | P_Value | Benjamini |
| <input type="checkbox"/> | GOTERM_MF_FAT         | <a href="#">heat shock protein binding</a>                           | RT |  | 4     | 9.3E-1  | 1.0EO     |
| <input type="checkbox"/> | INTERPRO              | <a href="#">Heat shock protein DnaJ, N-terminal</a>                  | RT |  | 4     | 9.4E-1  | 1.0EO     |
| <input type="checkbox"/> | SMART                 | <a href="#">DnaJ</a>                                                 | RT |  | 4     | 9.4E-1  | 1.0EO     |
| <input type="checkbox"/> | INTERPRO              | <a href="#">Molecular chaperone, heat shock protein, Hsp40, DnaJ</a> | RT |  | 3     | 9.8E-1  | 1.0EO     |
|                          | Annotation Cluster 69 | Enrichment Score: 0.02                                               |    |  | Count | P_Value | Benjamini |
| <input type="checkbox"/> | GOTERM_MF_FAT         | <a href="#">acetyltransferase activity</a>                           | RT |  | 5     | 9.2E-1  | 1.0EO     |
| <input type="checkbox"/> | INTERPRO              | <a href="#">Acyl-CoA N-acyltransferase</a>                           | RT |  | 5     | 9.3E-1  | 1.0EO     |
| <input type="checkbox"/> | GOTERM_MF_FAT         | <a href="#">N-acetyltransferase activity</a>                         | RT |  | 4     | 9.6E-1  | 1.0EO     |
| <input type="checkbox"/> | INTERPRO              | <a href="#">GCN5-related N-acetyltransferase</a>                     | RT |  | 4     | 9.7E-1  | 1.0EO     |
| <input type="checkbox"/> | GOTERM_MF_FAT         | <a href="#">N-acyltransferase activity</a>                           | RT |  | 4     | 9.8E-1  | 1.0EO     |
|                          | Annotation Cluster 70 | Enrichment Score: 0.01                                               |    |  | Count | P_Value | Benjamini |
| <input type="checkbox"/> | INTERPRO              | <a href="#">WD40 repeat 2</a>                                        | RT |  | 21    | 9.6E-1  | 1.0EO     |
| <input type="checkbox"/> | INTERPRO              | <a href="#">WD40 repeat, region</a>                                  | RT |  | 23    | 9.6E-1  | 1.0EO     |
| <input type="checkbox"/> | INTERPRO              | <a href="#">WD40 repeat</a>                                          | RT |  | 36    | 9.8E-1  | 1.0EO     |
| <input type="checkbox"/> | SMART                 | <a href="#">WD40</a>                                                 | RT |  | 36    | 9.9E-1  | 1.0EO     |

|                          |                 |                                                              |    |  |       |         |           |
|--------------------------|-----------------|--------------------------------------------------------------|----|--|-------|---------|-----------|
| <input type="checkbox"/> | SP_PIR_KEYWORDS | <a href="#">wd_repeat</a>                                    | RT |  | 23    | 9.9E-1  | 1.0E0     |
| <input type="checkbox"/> | INTERPRO        | <a href="#">WD40 repeat_subgroup</a>                         | RT |  | 26    | 9.9E-1  | 1.0E0     |
| <input type="checkbox"/> | INTERPRO        | <a href="#">WD40/YVTN repeat-like</a>                        | RT |  | 34    | 9.9E-1  | 1.0E0     |
| <input type="checkbox"/> | INTERPRO        | <a href="#">WD40 repeat_conserved site</a>                   | RT |  | 9     | 1.0E0   | 1.0E0     |
| Annotation Cluster 71    |                 | Enrichment Score: 0.01                                       |    |  | Count | P_Value | Benjamini |
| <input type="checkbox"/> | GOTERM_MF_FAT   | <a href="#">RNA-directed DNA polymerase activity</a>         | RT |  | 11    | 9.6E-1  | 1.0E0     |
| <input type="checkbox"/> | SP_PIR_KEYWORDS | <a href="#">Endonuclease</a>                                 | RT |  | 14    | 9.7E-1  | 1.0E0     |
| <input type="checkbox"/> | GOTERM_MF_FAT   | <a href="#">nuclease activity</a>                            | RT |  | 23    | 9.8E-1  | 1.0E0     |
| <input type="checkbox"/> | GOTERM_MF_FAT   | <a href="#">DNA polymerase activity</a>                      | RT |  | 15    | 9.8E-1  | 1.0E0     |
| <input type="checkbox"/> | SP_PIR_KEYWORDS | <a href="#">rna-directed dna polymerase</a>                  | RT |  | 10    | 9.8E-1  | 1.0E0     |
| <input type="checkbox"/> | GOTERM_MF_FAT   | <a href="#">endonuclease activity</a>                        | RT |  | 14    | 9.9E-1  | 1.0E0     |
| Annotation Cluster 72    |                 | Enrichment Score: 0.01                                       |    |  | Count | P_Value | Benjamini |
| <input type="checkbox"/> | INTERPRO        | <a href="#">RNA recognition motif_RNP-1</a>                  | RT |  | 6     | 9.8E-1  | 1.0E0     |
| <input type="checkbox"/> | SMART           | <a href="#">RRM</a>                                          | RT |  | 6     | 9.8E-1  | 1.0E0     |
| <input type="checkbox"/> | INTERPRO        | <a href="#">Nucleotide-binding_alpha-beta plait</a>          | RT |  | 6     | 9.9E-1  | 1.0E0     |
| Annotation Cluster 73    |                 | Enrichment Score: 0.01                                       |    |  | Count | P_Value | Benjamini |
| <input type="checkbox"/> | GOTERM_MF_FAT   | <a href="#">cis-trans isomerase activity</a>                 | RT |  | 3     | 9.9E-1  | 1.0E0     |
| <input type="checkbox"/> | GOTERM_MF_FAT   | <a href="#">peptidyl-prolyl cis-trans isomerase activity</a> | RT |  | 3     | 9.9E-1  | 1.0E0     |
| <input type="checkbox"/> | SP_PIR_KEYWORDS | <a href="#">Rotamase</a>                                     | RT |  | 3     | 9.9E-1  | 1.0E0     |

219 terms were not clustered.

Please cite [Nature Protocols 2009; 4\(1\):44](#) & [Genome Biology 2003; 4\(5\):P3](#) within any publication that makes use of any methods inspired by DAVID.

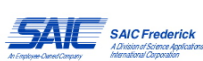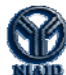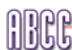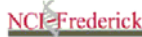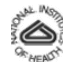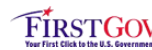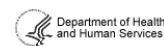

[Term of Service](#) | [Contact Us](#) | [Site Map](#)

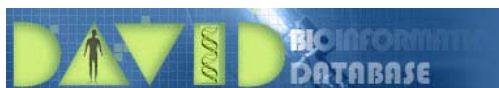

## Functional Annotation Clustering

[Help and Manual](#)

Current Gene List: 3\_Random2

Current Background: Giardia intestinalis

3000 DAVID IDs

Options Classification Stringency Medium

Rerun using options

Create Sublist

79 Cluster(s)

[Download File](#)

|                          | Annotation Cluster   | Enrichment Score                                                     |                    |  | Count | P_Value | Benjamini |
|--------------------------|----------------------|----------------------------------------------------------------------|--------------------|--|-------|---------|-----------|
| <input type="checkbox"/> | Annotation Cluster 1 | Enrichment Score: 1.83                                               |                    |  |       |         |           |
| <input type="checkbox"/> | INTERPRO             | <a href="#">Tetratricopeptide TPR-1</a>                              | <a href="#">RT</a> |  | 19    | 2.0E-3  | 8.9E-1    |
| <input type="checkbox"/> | INTERPRO             | <a href="#">Tetratricopeptide repeat</a>                             | <a href="#">RT</a> |  | 21    | 7.6E-3  | 9.9E-1    |
| <input type="checkbox"/> | SMART                | <a href="#">TPR</a>                                                  | <a href="#">RT</a> |  | 21    | 1.1E-2  | 8.2E-1    |
| <input type="checkbox"/> | INTERPRO             | <a href="#">Tetratricopeptide-like helical</a>                       | <a href="#">RT</a> |  | 25    | 1.9E-2  | 1.0E0     |
| <input type="checkbox"/> | SP_PIR_KEYWORDS      | <a href="#">tpr repeat</a>                                           | <a href="#">RT</a> |  | 9     | 5.2E-2  | 1.0E0     |
| <input type="checkbox"/> | INTERPRO             | <a href="#">Tetratricopeptide region</a>                             | <a href="#">RT</a> |  | 19    | 6.4E-2  | 1.0E0     |
| <input type="checkbox"/> | Annotation Cluster 2 | Enrichment Score: 1.1                                                |                    |  | Count | P_Value | Benjamini |
| <input type="checkbox"/> | GOTERM_BP_FAT        | <a href="#">cellular response to stress</a>                          | <a href="#">RT</a> |  | 17    | 4.8E-2  | 1.0E0     |
| <input type="checkbox"/> | GOTERM_BP_FAT        | <a href="#">response to DNA damage stimulus</a>                      | <a href="#">RT</a> |  | 16    | 6.7E-2  | 1.0E0     |
| <input type="checkbox"/> | GOTERM_BP_FAT        | <a href="#">DNA repair</a>                                           | <a href="#">RT</a> |  | 16    | 6.7E-2  | 1.0E0     |
| <input type="checkbox"/> | GOTERM_BP_FAT        | <a href="#">DNA metabolic process</a>                                | <a href="#">RT</a> |  | 38    | 1.9E-1  | 1.0E0     |
| <input type="checkbox"/> | Annotation Cluster 3 | Enrichment Score: 0.65                                               |                    |  | Count | P_Value | Benjamini |
| <input type="checkbox"/> | GOTERM_CC_FAT        | <a href="#">chromosome</a>                                           | <a href="#">RT</a> |  | 21    | 3.2E-2  | 9.8E-1    |
| <input type="checkbox"/> | GOTERM_CC_FAT        | <a href="#">chromosomal part</a>                                     | <a href="#">RT</a> |  | 14    | 6.0E-2  | 9.8E-1    |
| <input type="checkbox"/> | GOTERM_BP_FAT        | <a href="#">cellular macromolecular complex subunit organization</a> | <a href="#">RT</a> |  | 19    | 7.9E-2  | 1.0E0     |
| <input type="checkbox"/> | GOTERM_CC_FAT        | <a href="#">protein-DNA complex</a>                                  | <a href="#">RT</a> |  | 11    | 9.5E-2  | 9.8E-1    |
| <input type="checkbox"/> | GOTERM_BP_FAT        | <a href="#">macromolecular complex subunit organization</a>          | <a href="#">RT</a> |  | 20    | 9.6E-2  | 1.0E0     |
| <input type="checkbox"/> | GOTERM_BP_FAT        | <a href="#">cellular macromolecular complex assembly</a>             | <a href="#">RT</a> |  | 18    | 1.1E-1  | 1.0E0     |
| <input type="checkbox"/> | GOTERM_BP_FAT        | <a href="#">macromolecular complex assembly</a>                      | <a href="#">RT</a> |  | 19    | 1.2E-1  | 1.0E0     |
| <input type="checkbox"/> | GOTERM_CC_FAT        | <a href="#">chromatin</a>                                            | <a href="#">RT</a> |  | 10    | 1.4E-1  | 9.9E-1    |
| <input type="checkbox"/> | GOTERM_CC_FAT        | <a href="#">nucleosome</a>                                           | <a href="#">RT</a> |  | 9     | 2.0E-1  | 9.9E-1    |
| <input type="checkbox"/> | GOTERM_BP_FAT        | <a href="#">chromatin assembly</a>                                   | <a href="#">RT</a> |  | 9     | 2.1E-1  | 1.0E0     |
| <input type="checkbox"/> | GOTERM_BP_FAT        | <a href="#">protein-DNA complex assembly</a>                         | <a href="#">RT</a> |  | 9     | 2.1E-1  | 1.0E0     |
| <input type="checkbox"/> | GOTERM_BP_FAT        | <a href="#">nucleosome organization</a>                              | <a href="#">RT</a> |  | 9     | 2.1E-1  | 1.0E0     |
| <input type="checkbox"/> | GOTERM_BP_FAT        | <a href="#">nucleosome assembly</a>                                  | <a href="#">RT</a> |  | 9     | 2.1E-1  | 1.0E0     |
| <input type="checkbox"/> | GOTERM_BP_FAT        | <a href="#">DNA packaging</a>                                        | <a href="#">RT</a> |  | 9     | 2.1E-1  | 1.0E0     |
| <input type="checkbox"/> | INTERPRO             | <a href="#">Histone-fold</a>                                         | <a href="#">RT</a> |  | 11    | 2.3E-1  | 1.0E0     |
| <input type="checkbox"/> | SP_PIR_KEYWORDS      | <a href="#">chromosomal protein</a>                                  | <a href="#">RT</a> |  | 9     | 2.4E-1  | 9.9E-1    |
| <input type="checkbox"/> | SP_PIR_KEYWORDS      | <a href="#">nucleus</a>                                              | <a href="#">RT</a> |  | 23    | 2.5E-1  | 9.8E-1    |
| <input type="checkbox"/> | INTERPRO             | <a href="#">Histone core</a>                                         | <a href="#">RT</a> |  | 9     | 2.5E-1  | 1.0E0     |
| <input type="checkbox"/> | GOTERM_BP_FAT        | <a href="#">chromatin assembly or disassembly</a>                    | <a href="#">RT</a> |  | 10    | 2.6E-1  | 1.0E0     |
| <input type="checkbox"/> | INTERPRO             | <a href="#">Histone H3</a>                                           | <a href="#">RT</a> |  | 4     | 4.4E-1  | 1.0E0     |
| <input type="checkbox"/> | SP_PIR_KEYWORDS      | <a href="#">dna-binding</a>                                          | <a href="#">RT</a> |  | 22    | 4.5E-1  | 9.9E-1    |
| <input type="checkbox"/> | SMART                | <a href="#">H3</a>                                                   | <a href="#">RT</a> |  | 4     | 4.6E-1  | 1.0E0     |
| <input type="checkbox"/> | GOTERM_BP_FAT        | <a href="#">chromatin organization</a>                               | <a href="#">RT</a> |  | 10    | 4.9E-1  | 1.0E0     |
| <input type="checkbox"/> | GOTERM_BP_FAT        | <a href="#">chromosome organization</a>                              | <a href="#">RT</a> |  | 12    | 5.4E-1  | 1.0E0     |
| <input type="checkbox"/> | INTERPRO             | <a href="#">Histone H4</a>                                           | <a href="#">RT</a> |  | 3     | 6.2E-1  | 1.0E0     |
| <input type="checkbox"/> | PIR_SUPERFAMILY      | PIRSF002052:histone H4                                               | <a href="#">RT</a> |  | 3     | 6.2E-1  | 1.0E0     |
| <input type="checkbox"/> | SMART                | <a href="#">H4</a>                                                   | <a href="#">RT</a> |  | 3     | 6.4E-1  | 1.0E0     |
| <input type="checkbox"/> | SP_PIR_KEYWORDS      | <a href="#">nucleosome core</a>                                      | <a href="#">RT</a> |  | 5     | 6.6E-1  | 9.8E-1    |
| <input type="checkbox"/> | Annotation Cluster 4 | Enrichment Score: 0.61                                               |                    |  | Count | P_Value | Benjamini |
| <input type="checkbox"/> | SP_PIR_KEYWORDS      | <a href="#">egf-like domain</a>                                      | <a href="#">RT</a> |  | 13    | 2.0E-1  | 1.0E0     |
| <input type="checkbox"/> | INTERPRO             | <a href="#">EGF-like, type 3</a>                                     | <a href="#">RT</a> |  | 22    | 2.4E-1  | 1.0E0     |
| <input type="checkbox"/> | INTERPRO             | <a href="#">EGF, extracellular</a>                                   | <a href="#">RT</a> |  | 16    | 3.1E-1  | 1.0E0     |
| <input type="checkbox"/> | Annotation Cluster 5 | Enrichment Score: 0.6                                                |                    |  | Count | P_Value | Benjamini |

|                          |                 |                                                                |    |  |       |         |           |
|--------------------------|-----------------|----------------------------------------------------------------|----|--|-------|---------|-----------|
| <input type="checkbox"/> | GOTERM_MF_FAT   | <a href="#">purine nucleotide binding</a>                      | RT |  | 338   | 1.3E-1  | 1.0E0     |
| <input type="checkbox"/> | GOTERM_MF_FAT   | <a href="#">purine ribonucleotide binding</a>                  | RT |  | 333   | 1.5E-1  | 1.0E0     |
| <input type="checkbox"/> | GOTERM_MF_FAT   | <a href="#">ribonucleotide binding</a>                         | RT |  | 333   | 1.5E-1  | 1.0E0     |
| <input type="checkbox"/> | GOTERM_MF_FAT   | <a href="#">purine nucleoside binding</a>                      | RT |  | 309   | 1.7E-1  | 1.0E0     |
| <input type="checkbox"/> | GOTERM_MF_FAT   | <a href="#">adenyl nucleotide binding</a>                      | RT |  | 309   | 1.7E-1  | 1.0E0     |
| <input type="checkbox"/> | GOTERM_BP_FAT   | <a href="#">protein amino acid phosphorylation</a>             | RT |  | 158   | 1.9E-1  | 1.0E0     |
| <input type="checkbox"/> | GOTERM_MF_FAT   | <a href="#">adenyl ribonucleotide binding</a>                  | RT |  | 304   | 2.0E-1  | 1.0E0     |
| <input type="checkbox"/> | GOTERM_MF_FAT   | <a href="#">ATP binding</a>                                    | RT |  | 304   | 2.0E-1  | 1.0E0     |
| <input type="checkbox"/> | GOTERM_BP_FAT   | <a href="#">phosphorylation</a>                                | RT |  | 168   | 2.2E-1  | 1.0E0     |
| <input type="checkbox"/> | GOTERM_MF_FAT   | <a href="#">nucleoside binding</a>                             | RT |  | 309   | 2.4E-1  | 1.0E0     |
| <input type="checkbox"/> | GOTERM_BP_FAT   | <a href="#">phosphorus metabolic process</a>                   | RT |  | 176   | 2.7E-1  | 1.0E0     |
| <input type="checkbox"/> | GOTERM_BP_FAT   | <a href="#">phosphate metabolic process</a>                    | RT |  | 176   | 2.7E-1  | 1.0E0     |
| <input type="checkbox"/> | GOTERM_MF_FAT   | <a href="#">protein kinase activity</a>                        | RT |  | 158   | 2.7E-1  | 1.0E0     |
| <input type="checkbox"/> | GOTERM_MF_FAT   | <a href="#">nucleotide binding</a>                             | RT |  | 353   | 2.9E-1  | 1.0E0     |
| <input type="checkbox"/> | INTERPRO        | <a href="#">Protein kinase_core</a>                            | RT |  | 157   | 3.9E-1  | 1.0E0     |
| <input type="checkbox"/> | SP_PIR_KEYWORDS | <a href="#">atp-binding</a>                                    | RT |  | 150   | 4.2E-1  | 9.9E-1    |
| <input type="checkbox"/> | SP_PIR_KEYWORDS | <a href="#">kinase</a>                                         | RT |  | 190   | 4.9E-1  | 9.9E-1    |
| <input type="checkbox"/> | INTERPRO        | <a href="#">Serine/threonine protein kinase-related</a>        | RT |  | 135   | 5.4E-1  | 1.0E0     |
| <input type="checkbox"/> | SP_PIR_KEYWORDS | <a href="#">nucleotide-binding</a>                             | RT |  | 155   | 5.5E-1  | 9.9E-1    |
| Annotation Cluster 6     |                 | Enrichment Score: 0.56                                         |    |  | Count | P_Value | Benjamini |
| <input type="checkbox"/> | SP_PIR_KEYWORDS | <a href="#">helicase</a>                                       | RT |  | 31    | 9.4E-2  | 9.9E-1    |
| <input type="checkbox"/> | GOTERM_MF_FAT   | <a href="#">ATPase activity_coupled</a>                        | RT |  | 46    | 1.1E-1  | 1.0E0     |
| <input type="checkbox"/> | GOTERM_MF_FAT   | <a href="#">ATP-dependent helicase activity</a>                | RT |  | 26    | 1.6E-1  | 1.0E0     |
| <input type="checkbox"/> | GOTERM_MF_FAT   | <a href="#">purine NTP-dependent helicase activity</a>         | RT |  | 26    | 1.6E-1  | 1.0E0     |
| <input type="checkbox"/> | GOTERM_MF_FAT   | <a href="#">helicase activity</a>                              | RT |  | 35    | 2.0E-1  | 1.0E0     |
| <input type="checkbox"/> | INTERPRO        | <a href="#">DEAD-like helicase_N-terminal</a>                  | RT |  | 28    | 3.1E-1  | 1.0E0     |
| <input type="checkbox"/> | INTERPRO        | <a href="#">DNA/RNA helicase_DEAD/DEAH_box_type_N-terminal</a> | RT |  | 20    | 3.4E-1  | 1.0E0     |
| <input type="checkbox"/> | GOTERM_MF_FAT   | <a href="#">ATPase activity</a>                                | RT |  | 56    | 3.8E-1  | 1.0E0     |
| <input type="checkbox"/> | SMART           | <a href="#">DEXDc</a>                                          | RT |  | 28    | 3.8E-1  | 1.0E0     |
| <input type="checkbox"/> | INTERPRO        | <a href="#">Helicase_superfamily 1 and 2_ATP-binding</a>       | RT |  | 27    | 4.3E-1  | 1.0E0     |
| <input type="checkbox"/> | INTERPRO        | <a href="#">DNA/RNA helicase_C-terminal</a>                    | RT |  | 27    | 5.0E-1  | 1.0E0     |
| <input type="checkbox"/> | INTERPRO        | <a href="#">RNA helicase_DEAD-box_type_Q motif</a>             | RT |  | 11    | 5.7E-1  | 1.0E0     |
| <input type="checkbox"/> | SMART           | <a href="#">HELICc</a>                                         | RT |  | 27    | 5.8E-1  | 1.0E0     |
| Annotation Cluster 7     |                 | Enrichment Score: 0.48                                         |    |  | Count | P_Value | Benjamini |
| <input type="checkbox"/> | GOTERM_MF_FAT   | <a href="#">peptidyl-prolyl cis-trans isomerase activity</a>   | RT |  | 7     | 2.5E-1  | 1.0E0     |
| <input type="checkbox"/> | GOTERM_MF_FAT   | <a href="#">cis-trans isomerase activity</a>                   | RT |  | 7     | 2.5E-1  | 1.0E0     |
| <input type="checkbox"/> | SP_PIR_KEYWORDS | <a href="#">Rotamase</a>                                       | RT |  | 7     | 2.6E-1  | 9.8E-1    |
| <input type="checkbox"/> | SP_PIR_KEYWORDS | <a href="#">Isomerase</a>                                      | RT |  | 20    | 4.0E-1  | 9.9E-1    |
| <input type="checkbox"/> | GOTERM_BP_FAT   | <a href="#">protein folding</a>                                | RT |  | 19    | 4.1E-1  | 1.0E0     |
| <input type="checkbox"/> | INTERPRO        | <a href="#">Peptidyl-prolyl cis-trans isomerase_FKBP-type</a>  | RT |  | 5     | 5.0E-1  | 1.0E0     |
| Annotation Cluster 8     |                 | Enrichment Score: 0.43                                         |    |  | Count | P_Value | Benjamini |
| <input type="checkbox"/> | GOTERM_MF_FAT   | <a href="#">lipid binding</a>                                  | RT |  | 26    | 7.6E-2  | 1.0E0     |
| <input type="checkbox"/> | GOTERM_BP_FAT   | <a href="#">cytoskeleton organization</a>                      | RT |  | 12    | 2.3E-1  | 1.0E0     |
| <input type="checkbox"/> | GOTERM_MF_FAT   | <a href="#">phospholipid binding</a>                           | RT |  | 18    | 3.1E-1  | 1.0E0     |
| <input type="checkbox"/> | INTERPRO        | <a href="#">Alpha giardin</a>                                  | RT |  | 9     | 3.8E-1  | 1.0E0     |
| <input type="checkbox"/> | INTERPRO        | <a href="#">Annexin repeat</a>                                 | RT |  | 10    | 4.2E-1  | 1.0E0     |
| <input type="checkbox"/> | SMART           | <a href="#">ANX</a>                                            | RT |  | 10    | 4.7E-1  | 1.0E0     |
| <input type="checkbox"/> | GOTERM_MF_FAT   | <a href="#">calcium-dependent phospholipid binding</a>         | RT |  | 14    | 4.9E-1  | 1.0E0     |
| <input type="checkbox"/> | GOTERM_MF_FAT   | <a href="#">calcium ion binding</a>                            | RT |  | 25    | 6.0E-1  | 1.0E0     |
| <input type="checkbox"/> | SP_PIR_KEYWORDS | <a href="#">annexin</a>                                        | RT |  | 10    | 6.4E-1  | 9.9E-1    |
| <input type="checkbox"/> | INTERPRO        | <a href="#">Annexin</a>                                        | RT |  | 10    | 6.5E-1  | 1.0E0     |
| Annotation Cluster 9     |                 | Enrichment Score: 0.41                                         |    |  | Count | P_Value | Benjamini |
| <input type="checkbox"/> | GOTERM_BP_FAT   | <a href="#">translational elongation</a>                       | RT |  | 7     | 1.1E-1  | 1.0E0     |
| <input type="checkbox"/> | SP_PIR_KEYWORDS | <a href="#">elongation factor</a>                              | RT |  | 5     | 6.6E-1  | 9.8E-1    |
| <input type="checkbox"/> | GOTERM_MF_FAT   | <a href="#">translation elongation factor activity</a>         | RT |  | 5     | 7.7E-1  | 1.0E0     |
| Annotation Cluster 10    |                 | Enrichment Score: 0.41                                         |    |  | Count | P_Value | Benjamini |
| <input type="checkbox"/> | GOTERM_MF_FAT   | <a href="#">tubulin-tyrosine ligase activity</a>               | RT |  | 6     | 3.5E-1  | 1.0E0     |
|                          |                 | <a href="#">Tubulin-tyrosine ligase</a>                        | RT |  | 6     | 3.7E-1  | 1.0E0     |

| <input type="checkbox"/> | INTERPRO              |                                                                             |                        |  |  |  |  |       |         |           |
|--------------------------|-----------------------|-----------------------------------------------------------------------------|------------------------|--|--|--|--|-------|---------|-----------|
| <input type="checkbox"/> | GOTERM_MF_FAT         | <a href="#">acid-amino acid ligase activity</a>                             | RT                     |  |  |  |  | 17    | 4.6E-1  | 1.0E0     |
|                          | Annotation Cluster 11 |                                                                             | Enrichment Score: 0.39 |  |  |  |  | Count | P_Value | Benjamini |
| <input type="checkbox"/> | GOTERM_CC_FAT         | <a href="#">cell projection</a>                                             | RT                     |  |  |  |  | 4     | 4.0E-1  | 1.0E0     |
| <input type="checkbox"/> | GOTERM_CC_FAT         | <a href="#">flagellum</a>                                                   | RT                     |  |  |  |  | 4     | 4.0E-1  | 1.0E0     |
| <input type="checkbox"/> | SP_PIR_KEYWORDS       | <a href="#">flagellum</a>                                                   | RT                     |  |  |  |  | 4     | 4.3E-1  | 9.9E-1    |
|                          | Annotation Cluster 12 |                                                                             | Enrichment Score: 0.37 |  |  |  |  | Count | P_Value | Benjamini |
| <input type="checkbox"/> | GOTERM_BP_FAT         | <a href="#">intracellular transport</a>                                     | RT                     |  |  |  |  | 19    | 2.5E-1  | 1.0E0     |
| <input type="checkbox"/> | GOTERM_BP_FAT         | <a href="#">intracellular protein transport</a>                             | RT                     |  |  |  |  | 16    | 2.6E-1  | 1.0E0     |
| <input type="checkbox"/> | GOTERM_BP_FAT         | <a href="#">cellular macromolecule localization</a>                         | RT                     |  |  |  |  | 16    | 2.6E-1  | 1.0E0     |
| <input type="checkbox"/> | GOTERM_BP_FAT         | <a href="#">cellular protein localization</a>                               | RT                     |  |  |  |  | 16    | 2.6E-1  | 1.0E0     |
| <input type="checkbox"/> | GOTERM_BP_FAT         | <a href="#">establishment of protein localization</a>                       | RT                     |  |  |  |  | 20    | 5.1E-1  | 1.0E0     |
| <input type="checkbox"/> | GOTERM_BP_FAT         | <a href="#">protein transport</a>                                           | RT                     |  |  |  |  | 20    | 5.1E-1  | 1.0E0     |
| <input type="checkbox"/> | GOTERM_CC_FAT         | <a href="#">coated membrane</a>                                             | RT                     |  |  |  |  | 9     | 5.6E-1  | 1.0E0     |
| <input type="checkbox"/> | GOTERM_CC_FAT         | <a href="#">membrane coat</a>                                               | RT                     |  |  |  |  | 9     | 5.6E-1  | 1.0E0     |
| <input type="checkbox"/> | GOTERM_BP_FAT         | <a href="#">protein localization</a>                                        | RT                     |  |  |  |  | 20    | 5.9E-1  | 1.0E0     |
| <input type="checkbox"/> | GOTERM_BP_FAT         | <a href="#">vesicle-mediated transport</a>                                  | RT                     |  |  |  |  | 15    | 8.6E-1  | 1.0E0     |
|                          | Annotation Cluster 13 |                                                                             | Enrichment Score: 0.36 |  |  |  |  | Count | P_Value | Benjamini |
| <input type="checkbox"/> | GOTERM_MF_FAT         | <a href="#">DNA helicase activity</a>                                       | RT                     |  |  |  |  | 6     | 1.8E-1  | 1.0E0     |
| <input type="checkbox"/> | GOTERM_MF_FAT         | <a href="#">DNA-dependent ATPase activity</a>                               | RT                     |  |  |  |  | 7     | 2.5E-1  | 1.0E0     |
| <input type="checkbox"/> | GOTERM_MF_FAT         | <a href="#">ATP-dependent DNA helicase activity</a>                         | RT                     |  |  |  |  | 4     | 4.2E-1  | 1.0E0     |
| <input type="checkbox"/> | INTERPRO              | <a href="#">Helicase, superfamily 1 and 2, ATP-binding, DinG/Rad3-type</a>  | RT                     |  |  |  |  | 3     | 6.2E-1  | 1.0E0     |
| <input type="checkbox"/> | INTERPRO              | <a href="#">DEAD2</a>                                                       | RT                     |  |  |  |  | 3     | 6.2E-1  | 1.0E0     |
| <input type="checkbox"/> | INTERPRO              | <a href="#">Helicase, ATP-dependent, c2 type</a>                            | RT                     |  |  |  |  | 3     | 6.2E-1  | 1.0E0     |
| <input type="checkbox"/> | SMART                 | <a href="#">HELICc2</a>                                                     | RT                     |  |  |  |  | 3     | 6.4E-1  | 1.0E0     |
|                          | Annotation Cluster 14 |                                                                             | Enrichment Score: 0.33 |  |  |  |  | Count | P_Value | Benjamini |
| <input type="checkbox"/> | INTERPRO              | <a href="#">Ankyrin</a>                                                     | RT                     |  |  |  |  | 257   | 3.2E-1  | 1.0E0     |
| <input type="checkbox"/> | SP_PIR_KEYWORDS       | <a href="#">ank repeat</a>                                                  | RT                     |  |  |  |  | 176   | 5.3E-1  | 9.9E-1    |
| <input type="checkbox"/> | SMART                 | <a href="#">ANK</a>                                                         | RT                     |  |  |  |  | 257   | 6.0E-1  | 1.0E0     |
|                          | Annotation Cluster 15 |                                                                             | Enrichment Score: 0.33 |  |  |  |  | Count | P_Value | Benjamini |
| <input type="checkbox"/> | GOTERM_BP_FAT         | <a href="#">cellular macromolecular complex assembly</a>                    | RT                     |  |  |  |  | 18    | 1.1E-1  | 1.0E0     |
| <input type="checkbox"/> | GOTERM_BP_FAT         | <a href="#">cellular protein complex assembly</a>                           | RT                     |  |  |  |  | 8     | 4.3E-1  | 1.0E0     |
| <input type="checkbox"/> | GOTERM_BP_FAT         | <a href="#">protein complex assembly</a>                                    | RT                     |  |  |  |  | 9     | 4.6E-1  | 1.0E0     |
| <input type="checkbox"/> | GOTERM_BP_FAT         | <a href="#">protein complex biogenesis</a>                                  | RT                     |  |  |  |  | 9     | 4.6E-1  | 1.0E0     |
| <input type="checkbox"/> | GOTERM_BP_FAT         | <a href="#">protein polymerization</a>                                      | RT                     |  |  |  |  | 6     | 5.1E-1  | 1.0E0     |
| <input type="checkbox"/> | INTERPRO              | <a href="#">Tubulin, conserved site</a>                                     | RT                     |  |  |  |  | 6     | 5.4E-1  | 1.0E0     |
| <input type="checkbox"/> | INTERPRO              | <a href="#">Tubulin</a>                                                     | RT                     |  |  |  |  | 6     | 5.4E-1  | 1.0E0     |
| <input type="checkbox"/> | INTERPRO              | <a href="#">Tubulin/FtsZ, GTPase domain</a>                                 | RT                     |  |  |  |  | 6     | 5.4E-1  | 1.0E0     |
| <input type="checkbox"/> | INTERPRO              | <a href="#">Tubulin/FtsZ, 2-layer sandwich domain</a>                       | RT                     |  |  |  |  | 5     | 6.7E-1  | 1.0E0     |
| <input type="checkbox"/> | PIR_SUPERFAMILY       | PIRSF002306: tubulin                                                        | RT                     |  |  |  |  | 5     | 6.7E-1  | 1.0E0     |
| <input type="checkbox"/> | GOTERM_MF_FAT         | <a href="#">GTPase activity</a>                                             | RT                     |  |  |  |  | 10    | 7.1E-1  | 1.0E0     |
|                          | Annotation Cluster 16 |                                                                             | Enrichment Score: 0.32 |  |  |  |  | Count | P_Value | Benjamini |
| <input type="checkbox"/> | GOTERM_BP_FAT         | <a href="#">protein localization in organelle</a>                           | RT                     |  |  |  |  | 5     | 2.8E-1  | 1.0E0     |
| <input type="checkbox"/> | GOTERM_BP_FAT         | <a href="#">protein targeting</a>                                           | RT                     |  |  |  |  | 5     | 2.8E-1  | 1.0E0     |
| <input type="checkbox"/> | KEGG_PATHWAY          | <a href="#">Protein export</a>                                              | RT                     |  |  |  |  | 3     | 5.7E-1  | 1.0E0     |
| <input type="checkbox"/> | GOTERM_BP_FAT         | <a href="#">protein targeting to ER</a>                                     | RT                     |  |  |  |  | 3     | 5.9E-1  | 1.0E0     |
| <input type="checkbox"/> | GOTERM_BP_FAT         | <a href="#">SRP-dependent cotranslational protein targeting to membrane</a> | RT                     |  |  |  |  | 3     | 5.9E-1  | 1.0E0     |
| <input type="checkbox"/> | GOTERM_BP_FAT         | <a href="#">cotranslational protein targeting to membrane</a>               | RT                     |  |  |  |  | 3     | 5.9E-1  | 1.0E0     |
| <input type="checkbox"/> | GOTERM_BP_FAT         | <a href="#">protein targeting to membrane</a>                               | RT                     |  |  |  |  | 3     | 5.9E-1  | 1.0E0     |
|                          | Annotation Cluster 17 |                                                                             | Enrichment Score: 0.32 |  |  |  |  | Count | P_Value | Benjamini |
| <input type="checkbox"/> | INTERPRO              | <a href="#">EGF-like</a>                                                    | RT                     |  |  |  |  | 115   | 3.0E-1  | 1.0E0     |
| <input type="checkbox"/> | INTERPRO              | <a href="#">Giardia variant-specific surface protein</a>                    | RT                     |  |  |  |  | 141   | 3.4E-1  | 1.0E0     |
| <input type="checkbox"/> | SMART                 | <a href="#">EGF</a>                                                         | RT                     |  |  |  |  | 115   | 4.6E-1  | 1.0E0     |
| <input type="checkbox"/> | INTERPRO              | <a href="#">Furin-like repeat</a>                                           | RT                     |  |  |  |  | 105   | 6.8E-1  | 1.0E0     |
| <input type="checkbox"/> | SMART                 | <a href="#">FU</a>                                                          | RT                     |  |  |  |  | 105   | 8.2E-1  | 1.0E0     |
|                          | Annotation Cluster 18 |                                                                             | Enrichment Score: 0.31 |  |  |  |  | Count | P_Value | Benjamini |
| <input type="checkbox"/> | GOTERM_BP_FAT         | <a href="#">nucleotide biosynthetic process</a>                             | RT                     |  |  |  |  | 26    | 2.0E-1  | 1.0E0     |
| <input type="checkbox"/> | GOTERM_BP_FAT         | <a href="#">ATP metabolic process</a>                                       | RT                     |  |  |  |  | 17    | 2.8E-1  | 1.0E0     |



|                          |                 |                                                                                                                |    |   |    |        |        |
|--------------------------|-----------------|----------------------------------------------------------------------------------------------------------------|----|---|----|--------|--------|
| <input type="checkbox"/> | GOTERM_BP_FAT   | <a href="#">ATP biosynthetic process</a>                                                                       | RT |   | 17 | 2.8E-1 | 1.0EO  |
| <input type="checkbox"/> | GOTERM_BP_FAT   | <a href="#">nitrogen compound biosynthetic process</a>                                                         | RT | ■ | 31 | 2.9E-1 | 1.0EO  |
| <input type="checkbox"/> | GOTERM_MF_FAT   | <a href="#">ATPase activity, coupled to transmembrane movement of ions</a>                                     | RT | ■ | 14 | 3.0E-1 | 1.0EO  |
| <input type="checkbox"/> | GOTERM_MF_FAT   | <a href="#">ATPase activity, coupled to transmembrane movement of ions, phosphorylative mechanism</a>          | RT | ■ | 9  | 3.4E-1 | 1.0EO  |
| <input type="checkbox"/> | GOTERM_BP_FAT   | <a href="#">cation transport</a>                                                                               | RT | ■ | 16 | 3.4E-1 | 1.0EO  |
| <input type="checkbox"/> | GOTERM_BP_FAT   | <a href="#">ion transport</a>                                                                                  | RT | ■ | 16 | 3.4E-1 | 1.0EO  |
| <input type="checkbox"/> | INTERPRO        | <a href="#">ATPase, P-type, K/Mg/Cd/Cu/Zn/Na/Ca/Na/H-transporter</a>                                           | RT | ■ | 9  | 3.8E-1 | 1.0EO  |
| <input type="checkbox"/> | GOTERM_BP_FAT   | <a href="#">transmembrane transport</a>                                                                        | RT | ■ | 14 | 3.8E-1 | 1.0EO  |
| <input type="checkbox"/> | GOTERM_BP_FAT   | <a href="#">purine ribonucleotide biosynthetic process</a>                                                     | RT | ■ | 18 | 3.9E-1 | 1.0EO  |
| <input type="checkbox"/> | GOTERM_BP_FAT   | <a href="#">purine ribonucleotide metabolic process</a>                                                        | RT | ■ | 18 | 3.9E-1 | 1.0EO  |
| <input type="checkbox"/> | GOTERM_BP_FAT   | <a href="#">ribonucleotide biosynthetic process</a>                                                            | RT | ■ | 18 | 3.9E-1 | 1.0EO  |
| <input type="checkbox"/> | GOTERM_BP_FAT   | <a href="#">ribonucleotide metabolic process</a>                                                               | RT | ■ | 18 | 3.9E-1 | 1.0EO  |
| <input type="checkbox"/> | GOTERM_BP_FAT   | <a href="#">nucleobase, nucleoside and nucleotide biosynthetic process</a>                                     | RT | ■ | 26 | 3.9E-1 | 1.0EO  |
| <input type="checkbox"/> | GOTERM_BP_FAT   | <a href="#">nucleobase, nucleoside, nucleotide and nucleic acid biosynthetic process</a>                       | RT | ■ | 26 | 3.9E-1 | 1.0EO  |
| <input type="checkbox"/> | KEGG_PATHWAY    | <a href="#">Oxidative phosphorylation</a>                                                                      | RT | ■ | 9  | 4.2E-1 | 1.0EO  |
| <input type="checkbox"/> | GOTERM_MF_FAT   | <a href="#">inorganic cation transmembrane transporter activity</a>                                            | RT | ■ | 12 | 4.4E-1 | 1.0EO  |
| <input type="checkbox"/> | GOTERM_BP_FAT   | <a href="#">nucleoside triphosphate metabolic process</a>                                                      | RT | ■ | 17 | 4.6E-1 | 1.0EO  |
| <input type="checkbox"/> | GOTERM_BP_FAT   | <a href="#">ribonucleoside triphosphate metabolic process</a>                                                  | RT | ■ | 17 | 4.6E-1 | 1.0EO  |
| <input type="checkbox"/> | GOTERM_BP_FAT   | <a href="#">purine nucleoside triphosphate biosynthetic process</a>                                            | RT | ■ | 17 | 4.6E-1 | 1.0EO  |
| <input type="checkbox"/> | GOTERM_BP_FAT   | <a href="#">nucleoside triphosphate biosynthetic process</a>                                                   | RT | ■ | 17 | 4.6E-1 | 1.0EO  |
| <input type="checkbox"/> | GOTERM_BP_FAT   | <a href="#">purine nucleoside triphosphate metabolic process</a>                                               | RT | ■ | 17 | 4.6E-1 | 1.0EO  |
| <input type="checkbox"/> | GOTERM_BP_FAT   | <a href="#">purine ribonucleoside triphosphate biosynthetic process</a>                                        | RT | ■ | 17 | 4.6E-1 | 1.0EO  |
| <input type="checkbox"/> | GOTERM_BP_FAT   | <a href="#">purine ribonucleoside triphosphate metabolic process</a>                                           | RT | ■ | 17 | 4.6E-1 | 1.0EO  |
| <input type="checkbox"/> | GOTERM_BP_FAT   | <a href="#">ribonucleoside triphosphate biosynthetic process</a>                                               | RT | ■ | 17 | 4.6E-1 | 1.0EO  |
| <input type="checkbox"/> | GOTERM_CC_FAT   | <a href="#">proton-transporting two-sector ATPase complex</a>                                                  | RT | ■ | 10 | 4.7E-1 | 1.0EO  |
| <input type="checkbox"/> | INTERPRO        | <a href="#">ATPase, P-type, ATPase-associated region</a>                                                       | RT | ■ | 8  | 4.7E-1 | 1.0EO  |
| <input type="checkbox"/> | GOTERM_BP_FAT   | <a href="#">purine nucleotide biosynthetic process</a>                                                         | RT | ■ | 18 | 4.8E-1 | 1.0EO  |
| <input type="checkbox"/> | GOTERM_BP_FAT   | <a href="#">hydrogen transport</a>                                                                             | RT | ■ | 10 | 4.9E-1 | 1.0EO  |
| <input type="checkbox"/> | GOTERM_BP_FAT   | <a href="#">proton transport</a>                                                                               | RT | ■ | 10 | 4.9E-1 | 1.0EO  |
| <input type="checkbox"/> | GOTERM_MF_FAT   | <a href="#">cation-transporting ATPase activity</a>                                                            | RT | ■ | 7  | 5.4E-1 | 1.0EO  |
| <input type="checkbox"/> | GOTERM_MF_FAT   | <a href="#">ATPase activity, coupled to transmembrane movement of substances</a>                               | RT | ■ | 17 | 5.5E-1 | 1.0EO  |
| <input type="checkbox"/> | GOTERM_MF_FAT   | <a href="#">ATPase activity, coupled to movement of substances</a>                                             | RT | ■ | 17 | 5.5E-1 | 1.0EO  |
| <input type="checkbox"/> | GOTERM_BP_FAT   | <a href="#">purine nucleotide metabolic process</a>                                                            | RT | ■ | 18 | 5.6E-1 | 1.0EO  |
| <input type="checkbox"/> | GOTERM_MF_FAT   | <a href="#">primary active transmembrane transporter activity</a>                                              | RT | ■ | 18 | 5.7E-1 | 1.0EO  |
| <input type="checkbox"/> | GOTERM_MF_FAT   | <a href="#">P-P-bond-hydrolysis-driven transmembrane transporter activity</a>                                  | RT | ■ | 18 | 5.7E-1 | 1.0EO  |
| <input type="checkbox"/> | GOTERM_MF_FAT   | <a href="#">hydrolase activity, acting on acid anhydrides, catalyzing transmembrane movement of substances</a> | RT | ■ | 18 | 5.7E-1 | 1.0EO  |
| <input type="checkbox"/> | GOTERM_BP_FAT   | <a href="#">ion transmembrane transport</a>                                                                    | RT | ■ | 9  | 5.9E-1 | 1.0EO  |
| <input type="checkbox"/> | GOTERM_CC_FAT   | <a href="#">proton-transporting V-type ATPase, V0 domain</a>                                                   | RT | ■ | 4  | 6.0E-1 | 1.0EO  |
| <input type="checkbox"/> | GOTERM_BP_FAT   | <a href="#">monovalent inorganic cation transport</a>                                                          | RT | ■ | 10 | 6.0E-1 | 1.0EO  |
| <input type="checkbox"/> | SP_PIR_KEYWORDS | <a href="#">Hydrogen ion transport</a>                                                                         | RT | ■ | 3  | 6.1E-1 | 9.9E-1 |
| <input type="checkbox"/> | GOTERM_CC_FAT   | <a href="#">proton-transporting V-type ATPase complex</a>                                                      | RT | ■ | 6  | 6.3E-1 | 1.0EO  |
| <input type="checkbox"/> | GOTERM_MF_FAT   | <a href="#">proton-transporting ATPase activity, rotational mechanism</a>                                      | RT | ■ | 5  | 6.4E-1 | 1.0EO  |
| <input type="checkbox"/> | GOTERM_BP_FAT   | <a href="#">generation of precursor metabolites and energy</a>                                                 | RT | ■ | 15 | 6.8E-1 | 1.0EO  |
| <input type="checkbox"/> | GOTERM_BP_FAT   | <a href="#">oxidative phosphorylation</a>                                                                      | RT | ■ | 8  | 6.8E-1 | 1.0EO  |
| <input type="checkbox"/> | GOTERM_BP_FAT   | <a href="#">ATP synthesis coupled proton transport</a>                                                         | RT | ■ | 8  | 6.8E-1 | 1.0EO  |
| <input type="checkbox"/> | GOTERM_BP_FAT   | <a href="#">energy coupled proton transport, down electrochemical gradient</a>                                 | RT | ■ | 8  | 6.8E-1 | 1.0EO  |
| <input type="checkbox"/> | GOTERM_MF_FAT   | <a href="#">hydrogen ion transmembrane transporter activity</a>                                                | RT | ■ | 9  | 7.0E-1 | 1.0EO  |
| <input type="checkbox"/> | GOTERM_MF_FAT   | <a href="#">monovalent inorganic cation transmembrane transporter activity</a>                                 | RT | ■ | 9  | 7.0E-1 | 1.0EO  |
| <input type="checkbox"/> | GOTERM_CC_FAT   | <a href="#">proton-transporting two-sector ATPase complex, catalytic domain</a>                                | RT | ■ | 5  | 7.5E-1 | 1.0EO  |
| <input type="checkbox"/> | GOTERM_CC_FAT   | <a href="#">proton-transporting two-sector ATPase complex, proton-transporting domain</a>                      | RT | ■ | 4  | 7.5E-1 | 1.0EO  |

| <input type="checkbox"/> |                       |                                                                               |    |  |  |  |  |       |         |           |  |  |
|--------------------------|-----------------------|-------------------------------------------------------------------------------|----|--|--|--|--|-------|---------|-----------|--|--|
| <input type="checkbox"/> | SP_PIR_KEYWORDS       | <a href="#">ion transport</a>                                                 | RT |  |  |  |  | 3     | 8.9E-1  | 9.9E-1    |  |  |
| <input type="checkbox"/> | SP_PIR_KEYWORDS       | <a href="#">transport</a>                                                     | RT |  |  |  |  | 6     | 9.2E-1  | 9.9E-1    |  |  |
|                          | Annotation Cluster 19 | Enrichment Score: 0.31                                                        |    |  |  |  |  | Count | P_Value | Benjamini |  |  |
| <input type="checkbox"/> | GOTERM_MF_FAT         | <a href="#">cysteine-type endopeptidase activity</a>                          | RT |  |  |  |  | 17    | 2.1E-1  | 1.0E0     |  |  |
| <input type="checkbox"/> | GOTERM_MF_FAT         | <a href="#">cysteine-type peptidase activity</a>                              | RT |  |  |  |  | 20    | 2.8E-1  | 1.0E0     |  |  |
| <input type="checkbox"/> | SP_PIR_KEYWORDS       | <a href="#">thiol protease</a>                                                | RT |  |  |  |  | 8     | 3.2E-1  | 9.9E-1    |  |  |
| <input type="checkbox"/> | GOTERM_MF_FAT         | <a href="#">endopeptidase activity</a>                                        | RT |  |  |  |  | 28    | 4.4E-1  | 1.0E0     |  |  |
| <input type="checkbox"/> | INTERPRO              | <a href="#">Peptidase, cysteine peptidase active site</a>                     | RT |  |  |  |  | 19    | 4.8E-1  | 1.0E0     |  |  |
| <input type="checkbox"/> | INTERPRO              | <a href="#">Peptidase C1A, papain C-terminal</a>                              | RT |  |  |  |  | 17    | 5.2E-1  | 1.0E0     |  |  |
| <input type="checkbox"/> | INTERPRO              | <a href="#">Peptidase C1A, papain</a>                                         | RT |  |  |  |  | 17    | 5.2E-1  | 1.0E0     |  |  |
| <input type="checkbox"/> | SMART                 | <a href="#">Pept_C1</a>                                                       | RT |  |  |  |  | 17    | 5.9E-1  | 1.0E0     |  |  |
| <input type="checkbox"/> | GOTERM_BP_FAT         | <a href="#">proteolysis</a>                                                   | RT |  |  |  |  | 49    | 6.8E-1  | 1.0E0     |  |  |
| <input type="checkbox"/> | GOTERM_MF_FAT         | <a href="#">peptidase activity, acting on L-amino acid peptides</a>           | RT |  |  |  |  | 38    | 6.8E-1  | 1.0E0     |  |  |
| <input type="checkbox"/> | GOTERM_MF_FAT         | <a href="#">peptidase activity</a>                                            | RT |  |  |  |  | 43    | 7.7E-1  | 1.0E0     |  |  |
| <input type="checkbox"/> | SP_PIR_KEYWORDS       | <a href="#">Protease</a>                                                      | RT |  |  |  |  | 19    | 8.6E-1  | 9.9E-1    |  |  |
|                          | Annotation Cluster 20 | Enrichment Score: 0.29                                                        |    |  |  |  |  | Count | P_Value | Benjamini |  |  |
| <input type="checkbox"/> | INTERPRO              | <a href="#">EGF-like, type 3</a>                                              | RT |  |  |  |  | 22    | 2.4E-1  | 1.0E0     |  |  |
| <input type="checkbox"/> | INTERPRO              | <a href="#">EGF-like, laminin</a>                                             | RT |  |  |  |  | 15    | 7.3E-1  | 1.0E0     |  |  |
| <input type="checkbox"/> | SMART                 | <a href="#">EGF_Lam</a>                                                       | RT |  |  |  |  | 15    | 7.8E-1  | 1.0E0     |  |  |
|                          | Annotation Cluster 21 | Enrichment Score: 0.27                                                        |    |  |  |  |  | Count | P_Value | Benjamini |  |  |
| <input type="checkbox"/> | SP_PIR_KEYWORDS       | <a href="#">cyclin</a>                                                        | RT |  |  |  |  | 8     | 3.2E-1  | 9.9E-1    |  |  |
| <input type="checkbox"/> | INTERPRO              | <a href="#">Cyclin, C-terminal</a>                                            | RT |  |  |  |  | 4     | 4.4E-1  | 1.0E0     |  |  |
| <input type="checkbox"/> | INTERPRO              | <a href="#">Cyclin, N-terminal</a>                                            | RT |  |  |  |  | 5     | 5.0E-1  | 1.0E0     |  |  |
| <input type="checkbox"/> | INTERPRO              | <a href="#">Cyclin</a>                                                        | RT |  |  |  |  | 4     | 6.5E-1  | 1.0E0     |  |  |
| <input type="checkbox"/> | SMART                 | <a href="#">CYCLIN</a>                                                        | RT |  |  |  |  | 4     | 6.7E-1  | 1.0E0     |  |  |
| <input type="checkbox"/> | INTERPRO              | <a href="#">Cyclin-related</a>                                                | RT |  |  |  |  | 4     | 7.9E-1  | 1.0E0     |  |  |
|                          | Annotation Cluster 22 | Enrichment Score: 0.26                                                        |    |  |  |  |  | Count | P_Value | Benjamini |  |  |
| <input type="checkbox"/> | GOTERM_BP_FAT         | <a href="#">nuclear transport</a>                                             | RT |  |  |  |  | 4     | 4.1E-1  | 1.0E0     |  |  |
| <input type="checkbox"/> | GOTERM_BP_FAT         | <a href="#">nucleocytoplasmic transport</a>                                   | RT |  |  |  |  | 4     | 4.1E-1  | 1.0E0     |  |  |
| <input type="checkbox"/> | GOTERM_CC_FAT         | <a href="#">endomembrane system</a>                                           | RT |  |  |  |  | 10    | 5.8E-1  | 1.0E0     |  |  |
| <input type="checkbox"/> | GOTERM_CC_FAT         | <a href="#">envelope</a>                                                      | RT |  |  |  |  | 4     | 6.0E-1  | 1.0E0     |  |  |
| <input type="checkbox"/> | GOTERM_CC_FAT         | <a href="#">pore complex</a>                                                  | RT |  |  |  |  | 4     | 6.0E-1  | 1.0E0     |  |  |
| <input type="checkbox"/> | GOTERM_CC_FAT         | <a href="#">organelle envelope</a>                                            | RT |  |  |  |  | 4     | 6.0E-1  | 1.0E0     |  |  |
| <input type="checkbox"/> | GOTERM_CC_FAT         | <a href="#">nuclear envelope</a>                                              | RT |  |  |  |  | 4     | 6.0E-1  | 1.0E0     |  |  |
| <input type="checkbox"/> | GOTERM_CC_FAT         | <a href="#">nuclear pore</a>                                                  | RT |  |  |  |  | 4     | 6.0E-1  | 1.0E0     |  |  |
|                          | Annotation Cluster 23 | Enrichment Score: 0.26                                                        |    |  |  |  |  | Count | P_Value | Benjamini |  |  |
| <input type="checkbox"/> | SP_PIR_KEYWORDS       | <a href="#">ligase</a>                                                        | RT |  |  |  |  | 36    | 2.1E-1  | 1.0E0     |  |  |
| <input type="checkbox"/> | SP_PIR_KEYWORDS       | <a href="#">protein biosynthesis</a>                                          | RT |  |  |  |  | 8     | 3.2E-1  | 9.9E-1    |  |  |
| <input type="checkbox"/> | KEGG_PATHWAY          | <a href="#">Aminoacyl-tRNA biosynthesis</a>                                   | RT |  |  |  |  | 14    | 3.3E-1  | 1.0E0     |  |  |
| <input type="checkbox"/> | GOTERM_BP_FAT         | <a href="#">tRNA aminoacylation for protein translation</a>                   | RT |  |  |  |  | 14    | 4.8E-1  | 1.0E0     |  |  |
| <input type="checkbox"/> | GOTERM_BP_FAT         | <a href="#">amino acid activation</a>                                         | RT |  |  |  |  | 14    | 5.8E-1  | 1.0E0     |  |  |
| <input type="checkbox"/> | GOTERM_BP_FAT         | <a href="#">tRNA aminoacylation</a>                                           | RT |  |  |  |  | 14    | 5.8E-1  | 1.0E0     |  |  |
| <input type="checkbox"/> | SP_PIR_KEYWORDS       | <a href="#">Aminoacyl-tRNA synthetase</a>                                     | RT |  |  |  |  | 14    | 6.2E-1  | 9.9E-1    |  |  |
| <input type="checkbox"/> | GOTERM_MF_FAT         | <a href="#">ligase activity, forming aminoacyl-tRNA and related compounds</a> | RT |  |  |  |  | 14    | 6.7E-1  | 1.0E0     |  |  |
| <input type="checkbox"/> | GOTERM_MF_FAT         | <a href="#">ligase activity, forming carbon-oxygen bonds</a>                  | RT |  |  |  |  | 14    | 6.7E-1  | 1.0E0     |  |  |
| <input type="checkbox"/> | GOTERM_MF_FAT         | <a href="#">aminoacyl-tRNA ligase activity</a>                                | RT |  |  |  |  | 14    | 6.7E-1  | 1.0E0     |  |  |
| <input type="checkbox"/> | INTERPRO              | <a href="#">Aminoacyl-tRNA synthetase, class II, conserved region</a>         | RT |  |  |  |  | 6     | 6.9E-1  | 1.0E0     |  |  |
| <input type="checkbox"/> | GOTERM_BP_FAT         | <a href="#">tRNA metabolic process</a>                                        | RT |  |  |  |  | 20    | 9.0E-1  | 1.0E0     |  |  |
| <input type="checkbox"/> | GOTERM_BP_FAT         | <a href="#">ncRNA metabolic process</a>                                       | RT |  |  |  |  | 25    | 9.5E-1  | 1.0E0     |  |  |
|                          | Annotation Cluster 24 | Enrichment Score: 0.25                                                        |    |  |  |  |  | Count | P_Value | Benjamini |  |  |
| <input type="checkbox"/> | GOTERM_CC_FAT         | <a href="#">non-membrane-bounded organelle</a>                                | RT |  |  |  |  | 94    | 1.4E-1  | 9.8E-1    |  |  |
| <input type="checkbox"/> | GOTERM_CC_FAT         | <a href="#">intracellular non-membrane-bounded organelle</a>                  | RT |  |  |  |  | 94    | 1.4E-1  | 9.8E-1    |  |  |
| <input type="checkbox"/> | GOTERM_MF_FAT         | <a href="#">structural molecule activity</a>                                  | RT |  |  |  |  | 46    | 7.1E-1  | 1.0E0     |  |  |
| <input type="checkbox"/> | KEGG_PATHWAY          | <a href="#">Ribosome</a>                                                      | RT |  |  |  |  | 36    | 7.7E-1  | 1.0E0     |  |  |
| <input type="checkbox"/> | GOTERM_CC_FAT         | <a href="#">ribosome</a>                                                      | RT |  |  |  |  | 40    | 7.9E-1  | 1.0E0     |  |  |
| <input type="checkbox"/> | GOTERM_BP_FAT         | <a href="#">translation</a>                                                   | RT |  |  |  |  | 60    | 8.2E-1  | 1.0E0     |  |  |
| <input type="checkbox"/> | GOTERM_CC_FAT         | <a href="#">ribonucleoprotein complex</a>                                     | RT |  |  |  |  | 52    | 8.6E-1  | 1.0E0     |  |  |

| <input type="checkbox"/> | Term                  | Description                                                                                           | RT |                                                                                     | Count | P_Value | Benjamini |
|--------------------------|-----------------------|-------------------------------------------------------------------------------------------------------|----|-------------------------------------------------------------------------------------|-------|---------|-----------|
| <input type="checkbox"/> | GOTERM_MF_FAT         | <a href="#">structural constituent of ribosome</a>                                                    | RT |                                                                                     | 35    | 9.1E-1  | 1.0E0     |
| <input type="checkbox"/> | SP_PIR_KEYWORDS       | <a href="#">ribosomal protein</a>                                                                     | RT |                                                                                     | 37    | 9.2E-1  | 9.9E-1    |
|                          | Annotation Cluster 25 | Enrichment Score: 0.24                                                                                |    |    |       |         |           |
| <input type="checkbox"/> | GOTERM_BP_FAT         | <a href="#">cell cycle</a>                                                                            | RT |                                                                                     | 7     | 2.4E-1  | 1.0E0     |
| <input type="checkbox"/> | GOTERM_BP_FAT         | <a href="#">M phase</a>                                                                               | RT |                                                                                     | 5     | 4.7E-1  | 1.0E0     |
| <input type="checkbox"/> | GOTERM_BP_FAT         | <a href="#">cell cycle process</a>                                                                    | RT |                                                                                     | 5     | 4.7E-1  | 1.0E0     |
| <input type="checkbox"/> | GOTERM_BP_FAT         | <a href="#">cell cycle phase</a>                                                                      | RT |                                                                                     | 5     | 4.7E-1  | 1.0E0     |
| <input type="checkbox"/> | GOTERM_BP_FAT         | <a href="#">M phase of mitotic cell cycle</a>                                                         | RT |                                                                                     | 3     | 7.8E-1  | 1.0E0     |
| <input type="checkbox"/> | GOTERM_BP_FAT         | <a href="#">mitotic cell cycle</a>                                                                    | RT |                                                                                     | 3     | 7.8E-1  | 1.0E0     |
| <input type="checkbox"/> | GOTERM_BP_FAT         | <a href="#">nuclear division</a>                                                                      | RT |                                                                                     | 3     | 7.8E-1  | 1.0E0     |
| <input type="checkbox"/> | GOTERM_BP_FAT         | <a href="#">organelle fission</a>                                                                     | RT |                                                                                     | 3     | 7.8E-1  | 1.0E0     |
| <input type="checkbox"/> | GOTERM_BP_FAT         | <a href="#">mitosis</a>                                                                               | RT |                                                                                     | 3     | 7.8E-1  | 1.0E0     |
|                          | Annotation Cluster 26 | Enrichment Score: 0.23                                                                                |    |    |       |         |           |
| <input type="checkbox"/> | PIR_SUPERFAMILY       | PIRSF000908: serine/threonine-protein phosphatase, conventional type                                  | RT |                                                                                     | 7     | 2.8E-1  | 1.0E0     |
| <input type="checkbox"/> | INTERPRO              | <a href="#">Metallophosphoesterase</a>                                                                | RT |                                                                                     | 14    | 4.4E-1  | 1.0E0     |
| <input type="checkbox"/> | INTERPRO              | <a href="#">Serine/threonine-specific protein phosphatase and bis(5-nucleosyl)-tetraphosphatase</a>   | RT |                                                                                     | 10    | 5.4E-1  | 1.0E0     |
| <input type="checkbox"/> | SMART                 | <a href="#">PP2Ac</a>                                                                                 | RT |                                                                                     | 10    | 5.9E-1  | 1.0E0     |
| <input type="checkbox"/> | GOTERM_MF_FAT         | <a href="#">phosphatase activity</a>                                                                  | RT |                                                                                     | 25    | 6.6E-1  | 1.0E0     |
| <input type="checkbox"/> | GOTERM_MF_FAT         | <a href="#">phosphoprotein phosphatase activity</a>                                                   | RT |                                                                                     | 16    | 7.0E-1  | 1.0E0     |
| <input type="checkbox"/> | SP_PIR_KEYWORDS       | <a href="#">iron</a>                                                                                  | RT |                                                                                     | 11    | 8.2E-1  | 9.9E-1    |
| <input type="checkbox"/> | GOTERM_MF_FAT         | <a href="#">iron ion binding</a>                                                                      | RT |                                                                                     | 15    | 9.3E-1  | 1.0E0     |
|                          | Annotation Cluster 27 | Enrichment Score: 0.23                                                                                |    |    |       |         |           |
| <input type="checkbox"/> | GOTERM_MF_FAT         | <a href="#">ATPase activity, coupled to transmembrane movement of ions, phosphorylative mechanism</a> | RT |                                                                                     | 9     | 3.4E-1  | 1.0E0     |
| <input type="checkbox"/> | INTERPRO              | <a href="#">ATPase, P-type, K/Mg/Cd/Cu/Zn/Na/Ca/Na/H-transporter</a>                                  | RT |                                                                                     | 9     | 3.8E-1  | 1.0E0     |
| <input type="checkbox"/> | GOTERM_MF_FAT         | <a href="#">lipid transporter activity</a>                                                            | RT |                                                                                     | 5     | 4.7E-1  | 1.0E0     |
| <input type="checkbox"/> | INTERPRO              | <a href="#">ATPase, P-type, ATPase-associated region</a>                                              | RT |                                                                                     | 8     | 4.7E-1  | 1.0E0     |
| <input type="checkbox"/> | INTERPRO              | <a href="#">Haloacid dehalogenase-like hydrolase</a>                                                  | RT |                                                                                     | 7     | 5.8E-1  | 1.0E0     |
| <input type="checkbox"/> | GOTERM_MF_FAT         | <a href="#">di-, tri-valent inorganic cation transmembrane transporter activity</a>                   | RT |                                                                                     | 3     | 6.0E-1  | 1.0E0     |
| <input type="checkbox"/> | GOTERM_BP_FAT         | <a href="#">lipid transport</a>                                                                       | RT |                                                                                     | 4     | 6.2E-1  | 1.0E0     |
| <input type="checkbox"/> | GOTERM_BP_FAT         | <a href="#">lipid localization</a>                                                                    | RT |                                                                                     | 4     | 6.2E-1  | 1.0E0     |
| <input type="checkbox"/> | GOTERM_MF_FAT         | <a href="#">metal ion transmembrane transporter activity</a>                                          | RT |                                                                                     | 4     | 6.2E-1  | 1.0E0     |
| <input type="checkbox"/> | GOTERM_MF_FAT         | <a href="#">aminophospholipid transporter activity</a>                                                | RT |                                                                                     | 4     | 6.2E-1  | 1.0E0     |
| <input type="checkbox"/> | GOTERM_MF_FAT         | <a href="#">phospholipid transporter activity</a>                                                     | RT |                                                                                     | 4     | 6.2E-1  | 1.0E0     |
| <input type="checkbox"/> | GOTERM_MF_FAT         | <a href="#">phospholipid-translocating ATPase activity</a>                                            | RT |                                                                                     | 4     | 6.2E-1  | 1.0E0     |
| <input type="checkbox"/> | GOTERM_MF_FAT         | <a href="#">magnesium ion binding</a>                                                                 | RT |                                                                                     | 9     | 7.0E-1  | 1.0E0     |
| <input type="checkbox"/> | GOTERM_BP_FAT         | <a href="#">phospholipid transport</a>                                                                | RT |                                                                                     | 3     | 7.8E-1  | 1.0E0     |
| <input type="checkbox"/> | INTERPRO              | <a href="#">ATPase, P-type phosphorylation site</a>                                                   | RT |                                                                                     | 5     | 7.9E-1  | 1.0E0     |
| <input type="checkbox"/> | INTERPRO              | <a href="#">ATPase, P-type, phospholipid-translocating, flippase</a>                                  | RT |                                                                                     | 3     | 8.0E-1  | 1.0E0     |
|                          | Annotation Cluster 28 | Enrichment Score: 0.23                                                                                |    |  |       |         |           |
| <input type="checkbox"/> | SP_PIR_KEYWORDS       | <a href="#">protein biosynthesis</a>                                                                  | RT |                                                                                     | 8     | 3.2E-1  | 9.9E-1    |
| <input type="checkbox"/> | INTERPRO              | <a href="#">Aminoacyl-tRNA synthetase, class II (D, K and N)</a>                                      | RT |                                                                                     | 3     | 6.2E-1  | 1.0E0     |
| <input type="checkbox"/> | INTERPRO              | <a href="#">Aminoacyl-tRNA synthetase, class II (D, K and N)-like</a>                                 | RT |                                                                                     | 3     | 6.2E-1  | 1.0E0     |
| <input type="checkbox"/> | PIR_SUPERFAMILY       | PIRSF001525: lysine-tRNA ligase                                                                       | RT |                                                                                     | 3     | 6.2E-1  | 1.0E0     |
| <input type="checkbox"/> | INTERPRO              | <a href="#">Aminoacyl-tRNA synthetase, class II, conserved region</a>                                 | RT |                                                                                     | 6     | 6.9E-1  | 1.0E0     |
| <input type="checkbox"/> | INTERPRO              | <a href="#">Nucleic acid binding, OB-fold, tRNA/helicase-type</a>                                     | RT |                                                                                     | 3     | 8.0E-1  | 1.0E0     |
|                          | Annotation Cluster 29 | Enrichment Score: 0.22                                                                                |    |  |       |         |           |
| <input type="checkbox"/> | INTERPRO              | <a href="#">Haloacid dehalogenase-like hydrolase</a>                                                  | RT |                                                                                     | 7     | 5.8E-1  | 1.0E0     |
| <input type="checkbox"/> | GOTERM_MF_FAT         | <a href="#">phosphoglycolate phosphatase activity</a>                                                 | RT |                                                                                     | 3     | 6.0E-1  | 1.0E0     |
| <input type="checkbox"/> | INTERPRO              | <a href="#">HAD-superfamily hydrolase, subfamily IA, variant 1</a>                                    | RT |                                                                                     | 3     | 6.2E-1  | 1.0E0     |
|                          | Annotation Cluster 30 | Enrichment Score: 0.19                                                                                |    |  |       |         |           |
| <input type="checkbox"/> | GOTERM_CC_FAT         | <a href="#">microtubule cytoskeleton</a>                                                              | RT |                                                                                     | 31    | 4.2E-1  | 1.0E0     |
| <input type="checkbox"/> | GOTERM_CC_FAT         | <a href="#">cytoskeletal part</a>                                                                     | RT |                                                                                     | 31    | 4.2E-1  | 1.0E0     |
| <input type="checkbox"/> | GOTERM_CC_FAT         | <a href="#">cytoskeleton</a>                                                                          | RT |                                                                                     | 32    | 4.4E-1  | 1.0E0     |
| <input type="checkbox"/> | GOTERM_BP_FAT         | <a href="#">microtubule-based process</a>                                                             | RT |                                                                                     | 32    | 4.9E-1  | 1.0E0     |
|                          |                       |                                                                                                       | RT |                                                                                     | 19    | 6.2E-1  | 1.0E0     |

|                          |                       |                                                                                       |    |  |  |  |       |         |           |
|--------------------------|-----------------------|---------------------------------------------------------------------------------------|----|--|--|--|-------|---------|-----------|
| <input type="checkbox"/> | GOTERM_CC_FAT         |                                                                                       |    |  |  |  |       |         |           |
| <input type="checkbox"/> | SP_PIR_KEYWORDS       | <a href="#">microtubule</a>                                                           | RT |  |  |  | 19    | 6.3E-1  | 9.9E-1    |
| <input type="checkbox"/> | GOTERM_BP_FAT         | <a href="#">microtubule-based movement</a>                                            | RT |  |  |  | 26    | 7.2E-1  | 1.0E0     |
| <input type="checkbox"/> | GOTERM_MF_FAT         | <a href="#">motor activity</a>                                                        | RT |  |  |  | 23    | 7.6E-1  | 1.0E0     |
| <input type="checkbox"/> | GOTERM_MF_FAT         | <a href="#">microtubule motor activity</a>                                            | RT |  |  |  | 23    | 7.6E-1  | 1.0E0     |
| <input type="checkbox"/> | INTERPRO              | <a href="#">Kinesin_motor region, conserved site</a>                                  | RT |  |  |  | 10    | 8.2E-1  | 1.0E0     |
| <input type="checkbox"/> | SP_PIR_KEYWORDS       | <a href="#">motor protein</a>                                                         | RT |  |  |  | 13    | 8.3E-1  | 9.9E-1    |
| <input type="checkbox"/> | INTERPRO              | <a href="#">Kinesin_motor region</a>                                                  | RT |  |  |  | 15    | 8.5E-1  | 1.0E0     |
| <input type="checkbox"/> | SMART                 | <a href="#">KISc</a>                                                                  | RT |  |  |  | 15    | 8.9E-1  | 1.0E0     |
|                          | Annotation Cluster 31 | Enrichment Score: 0.19                                                                |    |  |  |  | Count | P_Value | Benjamini |
| <input type="checkbox"/> | GOTERM_MF_FAT         | <a href="#">phosphoinositide binding</a>                                              | RT |  |  |  | 4     | 6.2E-1  | 1.0E0     |
| <input type="checkbox"/> | INTERPRO              | <a href="#">Phox-like</a>                                                             | RT |  |  |  | 4     | 6.5E-1  | 1.0E0     |
| <input type="checkbox"/> | SMART                 | <a href="#">PX</a>                                                                    | RT |  |  |  | 4     | 6.7E-1  | 1.0E0     |
|                          | Annotation Cluster 32 | Enrichment Score: 0.19                                                                |    |  |  |  | Count | P_Value | Benjamini |
| <input type="checkbox"/> | GOTERM_MF_FAT         | <a href="#">zinc ion binding</a>                                                      | RT |  |  |  | 88    | 4.2E-1  | 1.0E0     |
| <input type="checkbox"/> | GOTERM_MF_FAT         | <a href="#">ion binding</a>                                                           | RT |  |  |  | 146   | 5.4E-1  | 1.0E0     |
| <input type="checkbox"/> | GOTERM_MF_FAT         | <a href="#">cation binding</a>                                                        | RT |  |  |  | 146   | 5.4E-1  | 1.0E0     |
| <input type="checkbox"/> | GOTERM_MF_FAT         | <a href="#">transition metal ion binding</a>                                          | RT |  |  |  | 106   | 5.7E-1  | 1.0E0     |
| <input type="checkbox"/> | GOTERM_MF_FAT         | <a href="#">metal ion binding</a>                                                     | RT |  |  |  | 143   | 6.1E-1  | 1.0E0     |
| <input type="checkbox"/> | SP_PIR_KEYWORDS       | <a href="#">zinc</a>                                                                  | RT |  |  |  | 48    | 6.5E-1  | 9.9E-1    |
| <input type="checkbox"/> | SP_PIR_KEYWORDS       | <a href="#">zinc-finger</a>                                                           | RT |  |  |  | 35    | 6.6E-1  | 9.8E-1    |
| <input type="checkbox"/> | INTERPRO              | <a href="#">Zinc finger, RING-type</a>                                                | RT |  |  |  | 38    | 7.2E-1  | 1.0E0     |
| <input type="checkbox"/> | SMART                 | <a href="#">RING</a>                                                                  | RT |  |  |  | 38    | 8.0E-1  | 1.0E0     |
| <input type="checkbox"/> | SP_PIR_KEYWORDS       | <a href="#">metal-binding</a>                                                         | RT |  |  |  | 54    | 8.5E-1  | 9.9E-1    |
| <input type="checkbox"/> | INTERPRO              | <a href="#">Zinc finger, C3HC4 RING-type</a>                                          | RT |  |  |  | 17    | 9.5E-1  | 1.0E0     |
|                          | Annotation Cluster 33 | Enrichment Score: 0.18                                                                |    |  |  |  | Count | P_Value | Benjamini |
| <input type="checkbox"/> | COG_ONTOLOGY          | <a href="#">Nucleotide transport and metabolism</a>                                   | RT |  |  |  | 6     | 4.3E-1  | 1.0E0     |
| <input type="checkbox"/> | INTERPRO              | <a href="#">5'-Nucleotidase and apyrase</a>                                           | RT |  |  |  | 3     | 6.2E-1  | 1.0E0     |
| <input type="checkbox"/> | INTERPRO              | <a href="#">Predicted phosphoesterase, C1039.02 type</a>                              | RT |  |  |  | 3     | 6.2E-1  | 1.0E0     |
| <input type="checkbox"/> | PIRS_SUPERFAMILY      | PIRSF017316:phosphoesterase, C1039.02 type                                            | RT |  |  |  | 3     | 6.2E-1  | 1.0E0     |
| <input type="checkbox"/> | PIRS_SUPERFAMILY      | PIRSF017316:Pesterase_C1039                                                           | RT |  |  |  | 3     | 6.2E-1  | 1.0E0     |
| <input type="checkbox"/> | GOTERM_BP_FAT         | <a href="#">nitrogen compound catabolic process</a>                                   | RT |  |  |  | 4     | 7.7E-1  | 1.0E0     |
| <input type="checkbox"/> | GOTERM_BP_FAT         | <a href="#">nucleobase, nucleoside and nucleotide catabolic process</a>               | RT |  |  |  | 4     | 7.7E-1  | 1.0E0     |
| <input type="checkbox"/> | GOTERM_BP_FAT         | <a href="#">nucleobase, nucleoside, nucleotide and nucleic acid catabolic process</a> | RT |  |  |  | 4     | 7.7E-1  | 1.0E0     |
| <input type="checkbox"/> | GOTERM_BP_FAT         | <a href="#">nucleotide catabolic process</a>                                          | RT |  |  |  | 3     | 7.8E-1  | 1.0E0     |
|                          | Annotation Cluster 34 | Enrichment Score: 0.18                                                                |    |  |  |  | Count | P_Value | Benjamini |
| <input type="checkbox"/> | GOTERM_MF_FAT         | <a href="#">ligase activity, forming carbon-nitrogen bonds</a>                        | RT |  |  |  | 21    | 3.1E-1  | 1.0E0     |
| <input type="checkbox"/> | GOTERM_MF_FAT         | <a href="#">acid-amino acid ligase activity</a>                                       | RT |  |  |  | 17    | 4.6E-1  | 1.0E0     |
| <input type="checkbox"/> | GOTERM_MF_FAT         | <a href="#">small conjugating protein ligase activity</a>                             | RT |  |  |  | 8     | 6.8E-1  | 1.0E0     |
| <input type="checkbox"/> | SP_PIR_KEYWORDS       | <a href="#">ubl conjugation pathway</a>                                               | RT |  |  |  | 8     | 7.1E-1  | 9.9E-1    |
| <input type="checkbox"/> | INTERPRO              | <a href="#">Ubiquitin-conjugating enzyme, E2</a>                                      | RT |  |  |  | 7     | 8.0E-1  | 1.0E0     |
| <input type="checkbox"/> | INTERPRO              | <a href="#">Ubiquitin-conjugating enzyme/RWD-like</a>                                 | RT |  |  |  | 7     | 8.0E-1  | 1.0E0     |
| <input type="checkbox"/> | SMART                 | <a href="#">UBCc</a>                                                                  | RT |  |  |  | 7     | 8.3E-1  | 1.0E0     |
| <input type="checkbox"/> | PIRS_SUPERFAMILY      | PIRSF001567:ubiquitin-protein ligase E2                                               | RT |  |  |  | 3     | 9.5E-1  | 1.0E0     |
|                          | Annotation Cluster 35 | Enrichment Score: 0.17                                                                |    |  |  |  | Count | P_Value | Benjamini |
| <input type="checkbox"/> | GOTERM_MF_FAT         | <a href="#">guanyl ribonucleotide binding</a>                                         | RT |  |  |  | 29    | 4.6E-1  | 1.0E0     |
| <input type="checkbox"/> | GOTERM_MF_FAT         | <a href="#">GTP binding</a>                                                           | RT |  |  |  | 29    | 4.6E-1  | 1.0E0     |
| <input type="checkbox"/> | GOTERM_MF_FAT         | <a href="#">guanyl nucleotide binding</a>                                             | RT |  |  |  | 29    | 4.6E-1  | 1.0E0     |
| <input type="checkbox"/> | SP_PIR_KEYWORDS       | <a href="#">gtp-binding</a>                                                           | RT |  |  |  | 24    | 5.6E-1  | 9.9E-1    |
| <input type="checkbox"/> | GOTERM_MF_FAT         | <a href="#">GTPase activity</a>                                                       | RT |  |  |  | 10    | 7.1E-1  | 1.0E0     |
| <input type="checkbox"/> | GOTERM_BP_FAT         | <a href="#">small GTPase mediated signal transduction</a>                             | RT |  |  |  | 9     | 7.8E-1  | 1.0E0     |
| <input type="checkbox"/> | INTERPRO              | <a href="#">Small GTP-binding protein</a>                                             | RT |  |  |  | 11    | 8.3E-1  | 1.0E0     |
| <input type="checkbox"/> | INTERPRO              | <a href="#">Ras GTPase</a>                                                            | RT |  |  |  | 7     | 8.7E-1  | 1.0E0     |
| <input type="checkbox"/> | INTERPRO              | <a href="#">Ras</a>                                                                   | RT |  |  |  | 6     | 9.2E-1  | 1.0E0     |
| <input type="checkbox"/> | GOTERM_BP_FAT         | <a href="#">intracellular signaling cascade</a>                                       | RT |  |  |  | 10    | 9.3E-1  | 1.0E0     |
|                          | Annotation Cluster 36 | Enrichment Score: 0.15                                                                |    |  |  |  | Count | P_Value | Benjamini |
| <input type="checkbox"/> | INTERPRO              | <a href="#">Clathrin/coatomer adaptor, adaptin-like, N-terminal</a>                   | RT |  |  |  | 5     | 3.0E-1  | 1.0E0     |

|                          |                       |                                                                                   |    |                                                                                     |     |        |                         |
|--------------------------|-----------------------|-----------------------------------------------------------------------------------|----|-------------------------------------------------------------------------------------|-----|--------|-------------------------|
| <input type="checkbox"/> | GOTERM_CC_FAT         | <a href="#">organelle membrane</a>                                                | RT |                                                                                     | 8   | 4.1E-1 | 1.0EO                   |
| <input type="checkbox"/> | GOTERM_CC_FAT         | <a href="#">coated membrane</a>                                                   | RT |                                                                                     | 9   | 5.6E-1 | 1.0EO                   |
| <input type="checkbox"/> | GOTERM_CC_FAT         | <a href="#">membrane coat</a>                                                     | RT |                                                                                     | 9   | 5.6E-1 | 1.0EO                   |
| <input type="checkbox"/> | GOTERM_CC_FAT         | <a href="#">endomembrane system</a>                                               | RT |                                                                                     | 10  | 5.8E-1 | 1.0EO                   |
| <input type="checkbox"/> | GOTERM_CC_FAT         | <a href="#">Golgi apparatus part</a>                                              | RT |                                                                                     | 5   | 7.5E-1 | 1.0EO                   |
| <input type="checkbox"/> | GOTERM_CC_FAT         | <a href="#">vesicle membrane</a>                                                  | RT |                                                                                     | 4   | 7.5E-1 | 1.0EO                   |
| <input type="checkbox"/> | GOTERM_CC_FAT         | <a href="#">cytoplasmic vesicle part</a>                                          | RT |                                                                                     | 4   | 7.5E-1 | 1.0EO                   |
| <input type="checkbox"/> | GOTERM_CC_FAT         | <a href="#">vesicle</a>                                                           | RT |                                                                                     | 4   | 7.5E-1 | 1.0EO                   |
| <input type="checkbox"/> | GOTERM_CC_FAT         | <a href="#">cytoplasmic vesicle</a>                                               | RT |                                                                                     | 4   | 7.5E-1 | 1.0EO                   |
| <input type="checkbox"/> | GOTERM_CC_FAT         | <a href="#">cytoplasmic vesicle membrane</a>                                      | RT |                                                                                     | 4   | 7.5E-1 | 1.0EO                   |
| <input type="checkbox"/> | GOTERM_CC_FAT         | <a href="#">coated vesicle membrane</a>                                           | RT |                                                                                     | 4   | 7.5E-1 | 1.0EO                   |
| <input type="checkbox"/> | GOTERM_CC_FAT         | <a href="#">membrane-bounded vesicle</a>                                          | RT |                                                                                     | 4   | 7.5E-1 | 1.0EO                   |
| <input type="checkbox"/> | GOTERM_CC_FAT         | <a href="#">coated vesicle</a>                                                    | RT |                                                                                     | 4   | 7.5E-1 | 1.0EO                   |
| <input type="checkbox"/> | GOTERM_CC_FAT         | <a href="#">vesicle coat</a>                                                      | RT |                                                                                     | 4   | 7.5E-1 | 1.0EO                   |
| <input type="checkbox"/> | GOTERM_CC_FAT         | <a href="#">cytoplasmic membrane-bounded vesicle</a>                              | RT |                                                                                     | 4   | 7.5E-1 | 1.0EO                   |
| <input type="checkbox"/> | GOTERM_CC_FAT         | <a href="#">Golgi apparatus</a>                                                   | RT |                                                                                     | 6   | 8.4E-1 | 1.0EO                   |
| <input type="checkbox"/> | GOTERM_BP_FAT         | <a href="#">vesicle-mediated transport</a>                                        | RT |                                                                                     | 15  | 8.6E-1 | 1.0EO                   |
| <input type="checkbox"/> | GOTERM_CC_FAT         | <a href="#">transport vesicle membrane</a>                                        | RT |                                                                                     | 3   | 8.8E-1 | 1.0EO                   |
| <input type="checkbox"/> | GOTERM_CC_FAT         | <a href="#">transport vesicle</a>                                                 | RT |                                                                                     | 3   | 8.8E-1 | 1.0EO                   |
| <input type="checkbox"/> | GOTERM_BP_FAT         | <a href="#">Golgi vesicle transport</a>                                           | RT |                                                                                     | 3   | 9.4E-1 | 1.0EO                   |
| <input type="checkbox"/> | GOTERM_BP_FAT         | <a href="#">ER to Golgi vesicle-mediated transport</a>                            | RT |                                                                                     | 3   | 9.4E-1 | 1.0EO                   |
|                          | Annotation Cluster 37 | Enrichment Score: 0.15                                                            |    |    |     |        | Count P_Value Benjamini |
| <input type="checkbox"/> | GOTERM_BP_FAT         | <a href="#">carbohydrate biosynthetic process</a>                                 | RT |                                                                                     | 5   | 6.4E-1 | 1.0EO                   |
| <input type="checkbox"/> | GOTERM_BP_FAT         | <a href="#">cellular carbohydrate biosynthetic process</a>                        | RT |                                                                                     | 5   | 6.4E-1 | 1.0EO                   |
| <input type="checkbox"/> | GOTERM_BP_FAT         | <a href="#">alcohol biosynthetic process</a>                                      | RT |                                                                                     | 3   | 8.8E-1 | 1.0EO                   |
|                          | Annotation Cluster 38 | Enrichment Score: 0.14                                                            |    |   |     |        | Count P_Value Benjamini |
| <input type="checkbox"/> | INTERPRO              | <a href="#">Pyridine nucleotide-disulphide oxidoreductase, NAD-binding region</a> | RT |                                                                                     | 3   | 6.2E-1 | 1.0EO                   |
| <input type="checkbox"/> | GOTERM_MF_FAT         | <a href="#">FAD binding</a>                                                       | RT |                                                                                     | 4   | 7.7E-1 | 1.0EO                   |
| <input type="checkbox"/> | INTERPRO              | <a href="#">FAD-dependent pyridine nucleotide-disulphide oxidoreductase</a>       | RT |                                                                                     | 3   | 8.0E-1 | 1.0EO                   |
|                          | Annotation Cluster 39 | Enrichment Score: 0.14                                                            |    |  |     |        | Count P_Value Benjamini |
| <input type="checkbox"/> | GOTERM_BP_FAT         | <a href="#">regulation of transcription</a>                                       | RT |                                                                                     | 18  | 6.4E-1 | 1.0EO                   |
| <input type="checkbox"/> | GOTERM_BP_FAT         | <a href="#">regulation of RNA metabolic process</a>                               | RT |                                                                                     | 7   | 7.7E-1 | 1.0EO                   |
| <input type="checkbox"/> | GOTERM_BP_FAT         | <a href="#">regulation of transcription, DNA-dependent</a>                        | RT |                                                                                     | 7   | 7.7E-1 | 1.0EO                   |
|                          | Annotation Cluster 40 | Enrichment Score: 0.13                                                            |    |  |     |        | Count P_Value Benjamini |
| <input type="checkbox"/> | INTERPRO              | <a href="#">WD40 repeat</a>                                                       | RT |                                                                                     | 43  | 6.3E-1 | 1.0EO                   |
| <input type="checkbox"/> | INTERPRO              | <a href="#">WD40 repeat_region</a>                                                | RT |                                                                                     | 27  | 7.0E-1 | 1.0EO                   |
| <input type="checkbox"/> | INTERPRO              | <a href="#">WD40/YVTN repeat-like</a>                                             | RT |                                                                                     | 41  | 7.0E-1 | 1.0EO                   |
| <input type="checkbox"/> | SMART                 | <a href="#">WD40</a>                                                              | RT |                                                                                     | 43  | 7.2E-1 | 1.0EO                   |
| <input type="checkbox"/> | INTERPRO              | <a href="#">WD40 repeat_2</a>                                                     | RT |                                                                                     | 24  | 7.7E-1 | 1.0EO                   |
| <input type="checkbox"/> | SP_PIR_KEYWORDS       | <a href="#">wd repeat</a>                                                         | RT |                                                                                     | 27  | 7.8E-1 | 9.9E-1                  |
| <input type="checkbox"/> | INTERPRO              | <a href="#">WD40 repeat_subgroup</a>                                              | RT |                                                                                     | 31  | 7.9E-1 | 1.0EO                   |
| <input type="checkbox"/> | INTERPRO              | <a href="#">WD40 repeat_conserved site</a>                                        | RT |                                                                                     | 14  | 9.5E-1 | 1.0EO                   |
|                          | Annotation Cluster 41 | Enrichment Score: 0.12                                                            |    |  |     |        | Count P_Value Benjamini |
| <input type="checkbox"/> | GOTERM_MF_FAT         | <a href="#">electron carrier activity</a>                                         | RT |                                                                                     | 16  | 2.6E-1 | 1.0EO                   |
| <input type="checkbox"/> | INTERPRO              | <a href="#">4Fe-4S ferredoxin_iron-sulphur binding_subgroup</a>                   | RT |                                                                                     | 5   | 8.8E-1 | 1.0EO                   |
| <input type="checkbox"/> | INTERPRO              | <a href="#">4Fe-4S ferredoxin_iron-sulphur binding_domain</a>                     | RT |                                                                                     | 5   | 8.8E-1 | 1.0EO                   |
| <input type="checkbox"/> | INTERPRO              | <a href="#">4Fe-4S ferredoxin_iron-sulphur binding_conserved site</a>             | RT |                                                                                     | 4   | 8.8E-1 | 1.0EO                   |
| <input type="checkbox"/> | GOTERM_MF_FAT         | <a href="#">4 iron_4 sulfur cluster binding</a>                                   | RT |                                                                                     | 4   | 9.3E-1 | 1.0EO                   |
| <input type="checkbox"/> | GOTERM_MF_FAT         | <a href="#">iron-sulfur cluster binding</a>                                       | RT |                                                                                     | 9   | 9.6E-1 | 1.0EO                   |
| <input type="checkbox"/> | GOTERM_MF_FAT         | <a href="#">metal cluster binding</a>                                             | RT |                                                                                     | 9   | 9.6E-1 | 1.0EO                   |
|                          | Annotation Cluster 42 | Enrichment Score: 0.11                                                            |    |  |     |        | Count P_Value Benjamini |
| <input type="checkbox"/> | INTERPRO              | <a href="#">Serine/threonine protein kinase-related</a>                           | RT |  | 135 | 5.4E-1 | 1.0EO                   |
| <input type="checkbox"/> | INTERPRO              | <a href="#">Protein kinase_ATP binding site</a>                                   | RT |  | 48  | 5.9E-1 | 1.0EO                   |
| <input type="checkbox"/> | GOTERM_MF_FAT         | <a href="#">protein serine/threonine kinase activity</a>                          | RT |  | 57  | 7.5E-1 | 1.0EO                   |
| <input type="checkbox"/> | INTERPRO              | <a href="#">Serine/threonine protein kinase_active site</a>                       | RT |  | 48  | 8.6E-1 | 1.0EO                   |
| <input type="checkbox"/> | SP_PIR_KEYWORDS       | <a href="#">serine/threonine-protein kinase</a>                                   | RT |  | 32  | 8.8E-1 | 9.9E-1                  |
| <input type="checkbox"/> | INTERPRO              | <a href="#">Serine/threonine protein kinase</a>                                   | RT |  | 30  | 9.1E-1 | 1.0EO                   |

| <input type="checkbox"/> | SMART                 | <a href="#">S_TKc</a>                                                                | RT |  | 30    | 9.5E-1  | 1.0E0     |
|--------------------------|-----------------------|--------------------------------------------------------------------------------------|----|--|-------|---------|-----------|
|                          | Annotation Cluster 43 | Enrichment Score: 0.11                                                               |    |  | Count | P_Value | Benjamini |
| <input type="checkbox"/> | GOTERM_BP_FAT         | <a href="#">vitamin metabolic process</a>                                            | RT |  | 4     | 6.2E-1  | 1.0E0     |
| <input type="checkbox"/> | GOTERM_BP_FAT         | <a href="#">water-soluble vitamin metabolic process</a>                              | RT |  | 4     | 6.2E-1  | 1.0E0     |
| <input type="checkbox"/> | GOTERM_BP_FAT         | <a href="#">vitamin biosynthetic process</a>                                         | RT |  | 4     | 6.2E-1  | 1.0E0     |
| <input type="checkbox"/> | GOTERM_BP_FAT         | <a href="#">water-soluble vitamin biosynthetic process</a>                           | RT |  | 4     | 6.2E-1  | 1.0E0     |
| <input type="checkbox"/> | GOTERM_BP_FAT         | <a href="#">coenzyme metabolic process</a>                                           | RT |  | 6     | 7.7E-1  | 1.0E0     |
| <input type="checkbox"/> | GOTERM_BP_FAT         | <a href="#">oxidoreduction coenzyme metabolic process</a>                            | RT |  | 4     | 7.7E-1  | 1.0E0     |
| <input type="checkbox"/> | GOTERM_BP_FAT         | <a href="#">pyridine nucleotide metabolic process</a>                                | RT |  | 4     | 7.7E-1  | 1.0E0     |
| <input type="checkbox"/> | GOTERM_BP_FAT         | <a href="#">cofactor metabolic process</a>                                           | RT |  | 7     | 7.7E-1  | 1.0E0     |
| <input type="checkbox"/> | GOTERM_BP_FAT         | <a href="#">pyridine nucleotide biosynthetic process</a>                             | RT |  | 3     | 7.8E-1  | 1.0E0     |
| <input type="checkbox"/> | GOTERM_BP_FAT         | <a href="#">cofactor biosynthetic process</a>                                        | RT |  | 5     | 8.5E-1  | 1.0E0     |
| <input type="checkbox"/> | GOTERM_BP_FAT         | <a href="#">coenzyme biosynthetic process</a>                                        | RT |  | 4     | 8.6E-1  | 1.0E0     |
| <input type="checkbox"/> | GOTERM_BP_FAT         | <a href="#">secondary metabolic process</a>                                          | RT |  | 3     | 8.8E-1  | 1.0E0     |
| <input type="checkbox"/> | GOTERM_BP_FAT         | <a href="#">nicotinamide nucleotide metabolic process</a>                            | RT |  | 3     | 8.8E-1  | 1.0E0     |
| <input type="checkbox"/> | GOTERM_BP_FAT         | <a href="#">nicotinamide metabolic process</a>                                       | RT |  | 3     | 8.8E-1  | 1.0E0     |
| <input type="checkbox"/> | GOTERM_BP_FAT         | <a href="#">alkaloid metabolic process</a>                                           | RT |  | 3     | 8.8E-1  | 1.0E0     |
| <input type="checkbox"/> | GOTERM_BP_FAT         | <a href="#">cellular amide metabolic process</a>                                     | RT |  | 3     | 8.8E-1  | 1.0E0     |
|                          | Annotation Cluster 44 | Enrichment Score: 0.11                                                               |    |  | Count | P_Value | Benjamini |
| <input type="checkbox"/> | GOTERM_BP_FAT         | <a href="#">cellular amino acid biosynthetic process</a>                             | RT |  | 4     | 6.2E-1  | 1.0E0     |
| <input type="checkbox"/> | GOTERM_BP_FAT         | <a href="#">amine biosynthetic process</a>                                           | RT |  | 4     | 7.7E-1  | 1.0E0     |
| <input type="checkbox"/> | GOTERM_BP_FAT         | <a href="#">organic acid biosynthetic process</a>                                    | RT |  | 4     | 8.6E-1  | 1.0E0     |
| <input type="checkbox"/> | GOTERM_BP_FAT         | <a href="#">carboxylic acid biosynthetic process</a>                                 | RT |  | 4     | 8.6E-1  | 1.0E0     |
|                          | Annotation Cluster 45 | Enrichment Score: 0.11                                                               |    |  | Count | P_Value | Benjamini |
| <input type="checkbox"/> | INTERPRO              | <a href="#">Chaperonin TCP-1, conserved site</a>                                     | RT |  | 6     | 6.9E-1  | 1.0E0     |
| <input type="checkbox"/> | INTERPRO              | <a href="#">Chaperonin Cpn60/TCP-1</a>                                               | RT |  | 6     | 6.9E-1  | 1.0E0     |
| <input type="checkbox"/> | INTERPRO              | <a href="#">Chaperone, tailless complex polypeptide 1</a>                            | RT |  | 5     | 7.9E-1  | 1.0E0     |
| <input type="checkbox"/> | SP_PIR_KEYWORDS       | <a href="#">Chaperone</a>                                                            | RT |  | 7     | 7.9E-1  | 9.9E-1    |
| <input type="checkbox"/> | PIR_SUPERFAMILY       | PIRSF002584: molecular chaperone t-complex-type                                      | RT |  | 5     | 8.0E-1  | 1.0E0     |
| <input type="checkbox"/> | SP_PIR_KEYWORDS       | <a href="#">cytoplasm</a>                                                            | RT |  | 10    | 8.1E-1  | 9.9E-1    |
| <input type="checkbox"/> | GOTERM_MF_FAT         | <a href="#">unfolded protein binding</a>                                             | RT |  | 11    | 8.5E-1  | 1.0E0     |
|                          | Annotation Cluster 46 | Enrichment Score: 0.11                                                               |    |  | Count | P_Value | Benjamini |
| <input type="checkbox"/> | GOTERM_CC_FAT         | <a href="#">spindle pole</a>                                                         | RT |  | 3     | 7.7E-1  | 1.0E0     |
| <input type="checkbox"/> | GOTERM_CC_FAT         | <a href="#">spindle</a>                                                              | RT |  | 3     | 7.7E-1  | 1.0E0     |
| <input type="checkbox"/> | GOTERM_CC_FAT         | <a href="#">microtubule organizing center</a>                                        | RT |  | 3     | 7.7E-1  | 1.0E0     |
| <input type="checkbox"/> | GOTERM_BP_FAT         | <a href="#">microtubule cytoskeleton organization</a>                                | RT |  | 3     | 7.8E-1  | 1.0E0     |
| <input type="checkbox"/> | INTERPRO              | <a href="#">Spc97/Spc98</a>                                                          | RT |  | 3     | 8.0E-1  | 1.0E0     |
|                          | Annotation Cluster 47 | Enrichment Score: 0.11                                                               |    |  | Count | P_Value | Benjamini |
| <input type="checkbox"/> | GOTERM_BP_FAT         | <a href="#">secretion by cell</a>                                                    | RT |  | 3     | 7.8E-1  | 1.0E0     |
| <input type="checkbox"/> | GOTERM_BP_FAT         | <a href="#">exocytosis</a>                                                           | RT |  | 3     | 7.8E-1  | 1.0E0     |
| <input type="checkbox"/> | GOTERM_BP_FAT         | <a href="#">vesicle docking during exocytosis</a>                                    | RT |  | 3     | 7.8E-1  | 1.0E0     |
| <input type="checkbox"/> | GOTERM_BP_FAT         | <a href="#">vesicle docking</a>                                                      | RT |  | 3     | 7.8E-1  | 1.0E0     |
| <input type="checkbox"/> | GOTERM_BP_FAT         | <a href="#">secretion</a>                                                            | RT |  | 3     | 7.8E-1  | 1.0E0     |
| <input type="checkbox"/> | GOTERM_BP_FAT         | <a href="#">membrane docking</a>                                                     | RT |  | 3     | 7.8E-1  | 1.0E0     |
| <input type="checkbox"/> | INTERPRO              | <a href="#">Sec1-like protein</a>                                                    | RT |  | 3     | 8.0E-1  | 1.0E0     |
|                          | Annotation Cluster 48 | Enrichment Score: 0.11                                                               |    |  | Count | P_Value | Benjamini |
| <input type="checkbox"/> | INTERPRO              | <a href="#">Aminotransferase, class V/Cysteine desulfurase</a>                       | RT |  | 3     | 6.2E-1  | 1.0E0     |
| <input type="checkbox"/> | GOTERM_MF_FAT         | <a href="#">vitamin B6 binding</a>                                                   | RT |  | 6     | 7.7E-1  | 1.0E0     |
| <input type="checkbox"/> | GOTERM_MF_FAT         | <a href="#">pyridoxal phosphate binding</a>                                          | RT |  | 6     | 7.7E-1  | 1.0E0     |
| <input type="checkbox"/> | GOTERM_MF_FAT         | <a href="#">vitamin binding</a>                                                      | RT |  | 6     | 8.5E-1  | 1.0E0     |
| <input type="checkbox"/> | INTERPRO              | <a href="#">Pyridoxal phosphate-dependent transferase, major region, subdomain 1</a> | RT |  | 4     | 9.4E-1  | 1.0E0     |
|                          | Annotation Cluster 49 | Enrichment Score: 0.11                                                               |    |  | Count | P_Value | Benjamini |
| <input type="checkbox"/> | GOTERM_MF_FAT         | <a href="#">RNA polymerase activity</a>                                              | RT |  | 15    | 5.1E-1  | 1.0E0     |
| <input type="checkbox"/> | GOTERM_MF_FAT         | <a href="#">DNA-directed RNA polymerase activity</a>                                 | RT |  | 14    | 5.9E-1  | 1.0E0     |
| <input type="checkbox"/> | SP_PIR_KEYWORDS       | <a href="#">dna-directed rna polymerase</a>                                          | RT |  | 9     | 6.2E-1  | 9.9E-1    |
| <input type="checkbox"/> | KEGG_PATHWAY          | <a href="#">RNA polymerase</a>                                                       | RT |  | 9     | 8.7E-1  | 1.0E0     |
| <input type="checkbox"/> | SP_PIR_KEYWORDS       | <a href="#">nucleotidyltransferase</a>                                               | RT |  | 13    | 8.8E-1  | 9.9E-1    |
| <input type="checkbox"/> | GOTERM_BP_FAT         | <a href="#">transcription</a>                                                        | RT |  | 13    | 8.9E-1  | 1.0E0     |

| <input type="checkbox"/> | Category        | Term                                                                                   | RT |  | Count                  | P_Value | Benjamini |
|--------------------------|-----------------|----------------------------------------------------------------------------------------|----|--|------------------------|---------|-----------|
| <input type="checkbox"/> | KEGG_PATHWAY    | <a href="#">Pyrimidine metabolism</a>                                                  | RT |  | 15                     | 9.5E-1  | 1.0E0     |
| <input type="checkbox"/> | GOTERM_MF_FAT   | <a href="#">nucleotidyltransferase activity</a>                                        | RT |  | 35                     | 9.6E-1  | 1.0E0     |
| <input type="checkbox"/> | KEGG_PATHWAY    | <a href="#">Purine metabolism</a>                                                      | RT |  | 14                     | 9.7E-1  | 1.0E0     |
| Annotation Cluster 50    |                 |                                                                                        |    |  | Enrichment Score: 0.1  |         |           |
| <input type="checkbox"/> | SP_PIR_KEYWORDS | <a href="#">transmembrane</a>                                                          | RT |  | 17                     | 7.4E-1  | 9.9E-1    |
| <input type="checkbox"/> | SP_PIR_KEYWORDS | <a href="#">membrane</a>                                                               | RT |  | 15                     | 7.9E-1  | 9.9E-1    |
| <input type="checkbox"/> | INTERPRO        | <a href="#">Amino acid transporter, transmembrane</a>                                  | RT |  | 6                      | 8.0E-1  | 1.0E0     |
| <input type="checkbox"/> | GOTERM_CC_FAT   | <a href="#">intrinsic to membrane</a>                                                  | RT |  | 35                     | 8.1E-1  | 1.0E0     |
| <input type="checkbox"/> | GOTERM_CC_FAT   | <a href="#">integral to membrane</a>                                                   | RT |  | 35                     | 8.1E-1  | 1.0E0     |
| Annotation Cluster 51    |                 |                                                                                        |    |  | Enrichment Score: 0.1  |         |           |
| <input type="checkbox"/> | GOTERM_MF_FAT   | <a href="#">thiolester hydrolase activity</a>                                          | RT |  | 5                      | 7.7E-1  | 1.0E0     |
| <input type="checkbox"/> | GOTERM_MF_FAT   | <a href="#">ubiquitin thiolesterase activity</a>                                       | RT |  | 4                      | 7.7E-1  | 1.0E0     |
| <input type="checkbox"/> | INTERPRO        | <a href="#">Peptidase C19, ubiquitin carboxyl-terminal hydrolase 2</a>                 | RT |  | 4                      | 7.9E-1  | 1.0E0     |
| <input type="checkbox"/> | INTERPRO        | <a href="#">Peptidase C19, ubiquitin carboxyl-terminal hydrolase 2, conserved site</a> | RT |  | 3                      | 8.0E-1  | 1.0E0     |
| <input type="checkbox"/> | GOTERM_BP_FAT   | <a href="#">ubiquitin-dependent protein catabolic process</a>                          | RT |  | 7                      | 9.0E-1  | 1.0E0     |
| Annotation Cluster 52    |                 |                                                                                        |    |  | Enrichment Score: 0.09 |         |           |
| <input type="checkbox"/> | INTERPRO        | <a href="#">AMP-dependent synthetase and ligase</a>                                    | RT |  | 5                      | 6.7E-1  | 1.0E0     |
| <input type="checkbox"/> | COG_ONTOLOGY    | <a href="#">Lipid metabolism</a>                                                       | RT |  | 7                      | 7.8E-1  | 1.0E0     |
| <input type="checkbox"/> | GOTERM_MF_FAT   | <a href="#">long-chain-fatty-acid-CoA ligase activity</a>                              | RT |  | 3                      | 8.8E-1  | 1.0E0     |
| <input type="checkbox"/> | GOTERM_MF_FAT   | <a href="#">fatty-acid ligase activity</a>                                             | RT |  | 3                      | 8.8E-1  | 1.0E0     |
| <input type="checkbox"/> | GOTERM_MF_FAT   | <a href="#">ligase activity, forming carbon-sulfur bonds</a>                           | RT |  | 3                      | 8.8E-1  | 1.0E0     |
| Annotation Cluster 53    |                 |                                                                                        |    |  | Enrichment Score: 0.09 |         |           |
| <input type="checkbox"/> | KEGG_PATHWAY    | <a href="#">Glycolysis / Gluconeogenesis</a>                                           | RT |  | 5                      | 6.0E-1  | 1.0E0     |
| <input type="checkbox"/> | GOTERM_BP_FAT   | <a href="#">hexose metabolic process</a>                                               | RT |  | 12                     | 6.4E-1  | 1.0E0     |
| <input type="checkbox"/> | GOTERM_BP_FAT   | <a href="#">glucose metabolic process</a>                                              | RT |  | 12                     | 6.4E-1  | 1.0E0     |
| <input type="checkbox"/> | GOTERM_BP_FAT   | <a href="#">monosaccharide metabolic process</a>                                       | RT |  | 13                     | 7.3E-1  | 1.0E0     |
| <input type="checkbox"/> | GOTERM_BP_FAT   | <a href="#">hexose catabolic process</a>                                               | RT |  | 7                      | 9.0E-1  | 1.0E0     |
| <input type="checkbox"/> | GOTERM_BP_FAT   | <a href="#">carbohydrate catabolic process</a>                                         | RT |  | 7                      | 9.0E-1  | 1.0E0     |
| <input type="checkbox"/> | GOTERM_BP_FAT   | <a href="#">alcohol catabolic process</a>                                              | RT |  | 7                      | 9.0E-1  | 1.0E0     |
| <input type="checkbox"/> | GOTERM_BP_FAT   | <a href="#">monosaccharide catabolic process</a>                                       | RT |  | 7                      | 9.0E-1  | 1.0E0     |
| <input type="checkbox"/> | GOTERM_BP_FAT   | <a href="#">cellular carbohydrate catabolic process</a>                                | RT |  | 7                      | 9.0E-1  | 1.0E0     |
| <input type="checkbox"/> | GOTERM_BP_FAT   | <a href="#">glucose catabolic process</a>                                              | RT |  | 7                      | 9.0E-1  | 1.0E0     |
| <input type="checkbox"/> | SP_PIR_KEYWORDS | <a href="#">glycolysis</a>                                                             | RT |  | 3                      | 9.5E-1  | 1.0E0     |
| <input type="checkbox"/> | GOTERM_BP_FAT   | <a href="#">glycolysis</a>                                                             | RT |  | 5                      | 9.5E-1  | 1.0E0     |
| Annotation Cluster 54    |                 |                                                                                        |    |  | Enrichment Score: 0.08 |         |           |
| <input type="checkbox"/> | GOTERM_CC_FAT   | <a href="#">microtubule associated complex</a>                                         | RT |  | 9                      | 6.7E-1  | 1.0E0     |
| <input type="checkbox"/> | GOTERM_CC_FAT   | <a href="#">dynein complex</a>                                                         | RT |  | 6                      | 9.0E-1  | 1.0E0     |
| <input type="checkbox"/> | INTERPRO        | <a href="#">Dynein heavy chain</a>                                                     | RT |  | 6                      | 9.2E-1  | 1.0E0     |
| Annotation Cluster 55    |                 |                                                                                        |    |  | Enrichment Score: 0.08 |         |           |
| <input type="checkbox"/> | INTERPRO        | <a href="#">Kelch repeat type 1</a>                                                    | RT |  | 4                      | 7.9E-1  | 1.0E0     |
| <input type="checkbox"/> | SMART           | <a href="#">Kelch</a>                                                                  | RT |  | 4                      | 8.1E-1  | 1.0E0     |
| <input type="checkbox"/> | INTERPRO        | <a href="#">Kelch-type beta propeller</a>                                              | RT |  | 4                      | 8.8E-1  | 1.0E0     |
| Annotation Cluster 56    |                 |                                                                                        |    |  | Enrichment Score: 0.08 |         |           |
| <input type="checkbox"/> | GOTERM_BP_FAT   | <a href="#">proteolysis</a>                                                            | RT |  | 49                     | 6.8E-1  | 1.0E0     |
| <input type="checkbox"/> | GOTERM_BP_FAT   | <a href="#">macromolecule catabolic process</a>                                        | RT |  | 22                     | 6.8E-1  | 1.0E0     |
| <input type="checkbox"/> | SP_PIR_KEYWORDS | <a href="#">ubl conjugation pathway</a>                                                | RT |  | 8                      | 7.1E-1  | 9.9E-1    |
| <input type="checkbox"/> | GOTERM_BP_FAT   | <a href="#">cellular macromolecule catabolic process</a>                               | RT |  | 19                     | 7.2E-1  | 1.0E0     |
| <input type="checkbox"/> | GOTERM_BP_FAT   | <a href="#">protein catabolic process</a>                                              | RT |  | 21                     | 7.4E-1  | 1.0E0     |
| <input type="checkbox"/> | KEGG_PATHWAY    | <a href="#">Proteasome</a>                                                             | RT |  | 15                     | 7.7E-1  | 1.0E0     |
| <input type="checkbox"/> | GOTERM_BP_FAT   | <a href="#">proteolysis involved in cellular protein catabolic process</a>             | RT |  | 18                     | 7.7E-1  | 1.0E0     |
| <input type="checkbox"/> | GOTERM_BP_FAT   | <a href="#">cellular protein catabolic process</a>                                     | RT |  | 18                     | 7.7E-1  | 1.0E0     |
| <input type="checkbox"/> | GOTERM_BP_FAT   | <a href="#">modification-dependent protein catabolic process</a>                       | RT |  | 14                     | 8.0E-1  | 1.0E0     |
| <input type="checkbox"/> | GOTERM_BP_FAT   | <a href="#">modification-dependent macromolecule catabolic process</a>                 | RT |  | 14                     | 8.0E-1  | 1.0E0     |
| <input type="checkbox"/> | GOTERM_CC_FAT   | <a href="#">proteasome complex</a>                                                     | RT |  | 11                     | 8.4E-1  | 1.0E0     |
| <input type="checkbox"/> | INTERPRO        | <a href="#">Proteasome, alpha and beta subunits</a>                                    | RT |  | 7                      | 8.7E-1  | 1.0E0     |
| <input type="checkbox"/> | GOTERM_CC_FAT   | <a href="#">proteasome core complex</a>                                                | RT |  | 7                      | 8.9E-1  | 1.0E0     |
| <input type="checkbox"/> | GOTERM_BP_FAT   | <a href="#">ubiquitin-dependent protein catabolic process</a>                          | RT |  | 7                      | 9.0E-1  | 1.0E0     |

| Annotation Cluster    | Enrichment Score       | Term                                                                         | RT | Count | P_Value | Benjamini |
|-----------------------|------------------------|------------------------------------------------------------------------------|----|-------|---------|-----------|
|                       |                        | <a href="#">threonine-type peptidase activity</a>                            | RT | 7     | 9.0E-1  | 1.0E0     |
|                       |                        | <a href="#">threonine-type endopeptidase activity</a>                        | RT | 7     | 9.0E-1  | 1.0E0     |
|                       |                        | <a href="#">proteasome</a>                                                   | RT | 10    | 9.1E-1  | 9.9E-1    |
|                       |                        | <a href="#">Proteasome, subunit alpha/beta</a>                               | RT | 7     | 9.2E-1  | 1.0E0     |
|                       |                        | <a href="#">threonine protease</a>                                           | RT | 3     | 9.5E-1  | 1.0E0     |
|                       |                        | PIRSF001212: multicatalytic endopeptidase complex chain C9                   | RT | 3     | 9.5E-1  | 1.0E0     |
|                       |                        | <a href="#">cytosol</a>                                                      | RT | 13    | 9.6E-1  | 1.0E0     |
|                       |                        | <a href="#">Proteasome, alpha-subunit, conserved site</a>                    | RT | 3     | 9.8E-1  | 1.0E0     |
| Annotation Cluster 57 | Enrichment Score: 0.08 |                                                                              |    | Count | P_Value | Benjamini |
|                       |                        | <a href="#">small GTPase mediated signal transduction</a>                    | RT | 9     | 7.8E-1  | 1.0E0     |
|                       |                        | <a href="#">ADP-ribosylation factor</a>                                      | RT | 3     | 8.0E-1  | 1.0E0     |
|                       |                        | <a href="#">ARF</a>                                                          | RT | 3     | 8.1E-1  | 1.0E0     |
|                       |                        | <a href="#">ARF/SAR superfamily</a>                                          | RT | 4     | 8.8E-1  | 1.0E0     |
|                       |                        | PIRSF001711: ADP-ribosylation factor                                         | RT | 3     | 9.0E-1  | 1.0E0     |
| Annotation Cluster 58 | Enrichment Score: 0.08 |                                                                              |    | Count | P_Value | Benjamini |
|                       |                        | <a href="#">cAMP-dependent protein kinase regulator activity</a>             | RT | 3     | 7.8E-1  | 1.0E0     |
|                       |                        | <a href="#">protein kinase regulator activity</a>                            | RT | 4     | 8.7E-1  | 1.0E0     |
|                       |                        | <a href="#">kinase regulator activity</a>                                    | RT | 4     | 8.7E-1  | 1.0E0     |
| Annotation Cluster 59 | Enrichment Score: 0.07 |                                                                              |    | Count | P_Value | Benjamini |
|                       |                        | <a href="#">ATPase, AAA-type, core</a>                                       | RT | 14    | 7.9E-1  | 1.0E0     |
|                       |                        | <a href="#">ATPase, AAA+ type, core</a>                                      | RT | 38    | 8.7E-1  | 1.0E0     |
|                       |                        | <a href="#">AAA</a>                                                          | RT | 38    | 9.2E-1  | 1.0E0     |
| Annotation Cluster 60 | Enrichment Score: 0.06 |                                                                              |    | Count | P_Value | Benjamini |
|                       |                        | <a href="#">translation factor activity, nucleic acid binding</a>            | RT | 17    | 8.2E-1  | 1.0E0     |
|                       |                        | <a href="#">Initiation factor</a>                                            | RT | 10    | 8.7E-1  | 9.9E-1    |
|                       |                        | <a href="#">translation initiation factor activity</a>                       | RT | 12    | 9.3E-1  | 1.0E0     |
| Annotation Cluster 61 | Enrichment Score: 0.06 |                                                                              |    | Count | P_Value | Benjamini |
|                       |                        | <a href="#">Zinc finger, C2H2-like</a>                                       | RT | 10    | 8.2E-1  | 1.0E0     |
|                       |                        | <a href="#">ZnF_C2H2</a>                                                     | RT | 10    | 8.5E-1  | 1.0E0     |
|                       |                        | <a href="#">Zinc finger, C2H2-type</a>                                       | RT | 8     | 9.7E-1  | 1.0E0     |
| Annotation Cluster 62 | Enrichment Score: 0.05 |                                                                              |    | Count | P_Value | Benjamini |
|                       |                        | <a href="#">phosphoprotein phosphatase activity</a>                          | RT | 16    | 7.0E-1  | 1.0E0     |
|                       |                        | <a href="#">protein tyrosine phosphatase activity</a>                        | RT | 4     | 8.7E-1  | 1.0E0     |
|                       |                        | <a href="#">Dual-specific/protein-tyrosine phosphatase, conserved region</a> | RT | 3     | 9.0E-1  | 1.0E0     |
|                       |                        | <a href="#">Protein-tyrosine phosphatase</a>                                 | RT | 3     | 9.0E-1  | 1.0E0     |
|                       |                        | <a href="#">protein amino acid dephosphorylation</a>                         | RT | 6     | 9.4E-1  | 1.0E0     |
|                       |                        | <a href="#">Protein-tyrosine phosphatase, active site</a>                    | RT | 3     | 9.5E-1  | 1.0E0     |
|                       |                        | <a href="#">dephosphorylation</a>                                            | RT | 7     | 9.6E-1  | 1.0E0     |
| Annotation Cluster 63 | Enrichment Score: 0.05 |                                                                              |    | Count | P_Value | Benjamini |
|                       |                        | <a href="#">mismatch repair</a>                                              | RT | 3     | 8.8E-1  | 1.0E0     |
|                       |                        | <a href="#">double-stranded DNA binding</a>                                  | RT | 3     | 8.8E-1  | 1.0E0     |
|                       |                        | <a href="#">structure-specific DNA binding</a>                               | RT | 3     | 8.8E-1  | 1.0E0     |
|                       |                        | <a href="#">mismatched DNA binding</a>                                       | RT | 3     | 8.8E-1  | 1.0E0     |
| Annotation Cluster 64 | Enrichment Score: 0.05 |                                                                              |    | Count | P_Value | Benjamini |
|                       |                        | <a href="#">isoprenoid metabolic process</a>                                 | RT | 3     | 8.8E-1  | 1.0E0     |
|                       |                        | <a href="#">isoprenoid biosynthetic process</a>                              | RT | 3     | 8.8E-1  | 1.0E0     |
|                       |                        | <a href="#">lipid biosynthetic process</a>                                   | RT | 7     | 9.0E-1  | 1.0E0     |
| Annotation Cluster 65 | Enrichment Score: 0.05 |                                                                              |    | Count | P_Value | Benjamini |
|                       |                        | <a href="#">nucleoside-triphosphatase regulator activity</a>                 | RT | 8     | 6.8E-1  | 1.0E0     |
|                       |                        | <a href="#">small GTPase regulator activity</a>                              | RT | 6     | 8.5E-1  | 1.0E0     |
|                       |                        | <a href="#">GTPase regulator activity</a>                                    | RT | 6     | 8.5E-1  | 1.0E0     |
|                       |                        | <a href="#">regulation of small GTPase mediated signal transduction</a>      | RT | 5     | 8.5E-1  | 1.0E0     |
|                       |                        | <a href="#">regulation of Ras protein signal transduction</a>                | RT | 5     | 8.5E-1  | 1.0E0     |
|                       |                        | <a href="#">regulation of ARF protein signal transduction</a>                | RT | 3     | 8.8E-1  | 1.0E0     |
|                       |                        | <a href="#">enzyme activator activity</a>                                    | RT | 4     | 9.6E-1  | 1.0E0     |
|                       |                        | <a href="#">regulation of Ras GTPase activity</a>                            | RT | 3     | 9.7E-1  | 1.0E0     |
|                       |                        | <a href="#">GTPase activator activity</a>                                    | RT | 3     | 9.7E-1  | 1.0E0     |
|                       |                        | <a href="#">regulation of GTPase activity</a>                                | RT | 3     | 9.9E-1  | 1.0E0     |



| <input type="checkbox"/> | Annotation Cluster | Enrichment Score: 0.05                                                       | RT |  | Count | P_Value | Benjamini |
|--------------------------|--------------------|------------------------------------------------------------------------------|----|--|-------|---------|-----------|
| <input type="checkbox"/> | GOTERM_BP_FAT      | <a href="#">regulation of hydrolase activity</a>                             | RT |  | 3     | 9.9E-1  | 1.0EO     |
| <input type="checkbox"/> | INTERPRO           | <a href="#">Thioredoxin, conserved site</a>                                  | RT |  | 4     | 7.9E-1  | 1.0EO     |
| <input type="checkbox"/> | INTERPRO           | <a href="#">Thioredoxin domain</a>                                           | RT |  | 4     | 7.9E-1  | 1.0EO     |
| <input type="checkbox"/> | INTERPRO           | <a href="#">Thioredoxin core</a>                                             | RT |  | 4     | 8.8E-1  | 1.0EO     |
| <input type="checkbox"/> | INTERPRO           | <a href="#">Thioredoxin-like subdomain</a>                                   | RT |  | 3     | 9.0E-1  | 1.0EO     |
| <input type="checkbox"/> | GOTERM_BP_FAT      | <a href="#">cell redox homeostasis</a>                                       | RT |  | 9     | 9.0E-1  | 1.0EO     |
| <input type="checkbox"/> | INTERPRO           | <a href="#">Thioredoxin fold</a>                                             | RT |  | 11    | 9.2E-1  | 1.0EO     |
| <input type="checkbox"/> | GOTERM_BP_FAT      | <a href="#">cellular homeostasis</a>                                         | RT |  | 9     | 9.3E-1  | 1.0EO     |
| <input type="checkbox"/> | GOTERM_BP_FAT      | <a href="#">homeostatic process</a>                                          | RT |  | 9     | 9.6E-1  | 1.0EO     |
| <input type="checkbox"/> | INTERPRO           | <a href="#">Thioredoxin-like</a>                                             | RT |  | 5     | 9.9E-1  | 1.0EO     |
| <input type="checkbox"/> | GOTERM_BP_FAT      | <a href="#">response to drug</a>                                             | RT |  | 3     | 8.8E-1  | 1.0EO     |
| <input type="checkbox"/> | GOTERM_BP_FAT      | <a href="#">multidrug transport</a>                                          | RT |  | 3     | 8.8E-1  | 1.0EO     |
| <input type="checkbox"/> | GOTERM_BP_FAT      | <a href="#">drug transport</a>                                               | RT |  | 3     | 8.8E-1  | 1.0EO     |
| <input type="checkbox"/> | GOTERM_MF_FAT      | <a href="#">drug transporter activity</a>                                    | RT |  | 3     | 8.8E-1  | 1.0EO     |
| <input type="checkbox"/> | INTERPRO           | <a href="#">Multi antimicrobial extrusion protein MatE</a>                   | RT |  | 3     | 9.0E-1  | 1.0EO     |
| <input type="checkbox"/> | GOTERM_MF_FAT      | <a href="#">antiporter activity</a>                                          | RT |  | 3     | 9.4E-1  | 1.0EO     |
| <input type="checkbox"/> | GOTERM_BP_FAT      | <a href="#">RNA-dependent DNA replication</a>                                | RT |  | 4     | 8.6E-1  | 1.0EO     |
| <input type="checkbox"/> | INTERPRO           | <a href="#">RNA-directed DNA polymerase (reverse transcriptase)</a>          | RT |  | 4     | 8.8E-1  | 1.0EO     |
| <input type="checkbox"/> | INTERPRO           | <a href="#">RNA-directed DNA polymerase (reverse transcriptase), related</a> | RT |  | 3     | 9.0E-1  | 1.0EO     |
| <input type="checkbox"/> | GOTERM_MF_FAT      | <a href="#">RNA-directed DNA polymerase activity</a>                         | RT |  | 11    | 9.5E-1  | 1.0EO     |
| <input type="checkbox"/> | GOTERM_MF_FAT      | <a href="#">exopeptidase activity</a>                                        | RT |  | 6     | 8.5E-1  | 1.0EO     |
| <input type="checkbox"/> | GOTERM_MF_FAT      | <a href="#">metalloexopeptidase activity</a>                                 | RT |  | 4     | 8.7E-1  | 1.0EO     |
| <input type="checkbox"/> | GOTERM_MF_FAT      | <a href="#">metallopeptidase activity</a>                                    | RT |  | 5     | 9.8E-1  | 1.0EO     |
| <input type="checkbox"/> | GOTERM_BP_FAT      | <a href="#">organophosphate metabolic process</a>                            | RT |  | 7     | 8.5E-1  | 1.0EO     |
| <input type="checkbox"/> | GOTERM_BP_FAT      | <a href="#">phospholipid biosynthetic process</a>                            | RT |  | 4     | 8.6E-1  | 1.0EO     |
| <input type="checkbox"/> | GOTERM_BP_FAT      | <a href="#">lipid biosynthetic process</a>                                   | RT |  | 7     | 9.0E-1  | 1.0EO     |
| <input type="checkbox"/> | GOTERM_BP_FAT      | <a href="#">phospholipid metabolic process</a>                               | RT |  | 6     | 9.1E-1  | 1.0EO     |
| <input type="checkbox"/> | GOTERM_BP_FAT      | <a href="#">glycerophospholipid metabolic process</a>                        | RT |  | 3     | 9.7E-1  | 1.0EO     |
| <input type="checkbox"/> | GOTERM_BP_FAT      | <a href="#">glycerolipid metabolic process</a>                               | RT |  | 3     | 9.7E-1  | 1.0EO     |
| <input type="checkbox"/> | GOTERM_BP_FAT      | <a href="#">phosphoinositide metabolic process</a>                           | RT |  | 3     | 9.7E-1  | 1.0EO     |
| <input type="checkbox"/> | INTERPRO           | <a href="#">EF hand</a>                                                      | RT |  | 6     | 8.7E-1  | 1.0EO     |
| <input type="checkbox"/> | INTERPRO           | <a href="#">EF-HAND 2</a>                                                    | RT |  | 9     | 8.7E-1  | 1.0EO     |
| <input type="checkbox"/> | INTERPRO           | <a href="#">EF-Hand type</a>                                                 | RT |  | 9     | 9.2E-1  | 1.0EO     |
| <input type="checkbox"/> | INTERPRO           | <a href="#">EF-HAND 1</a>                                                    | RT |  | 10    | 9.2E-1  | 1.0EO     |
| <input type="checkbox"/> | SP_PIR_KEYWORDS    | <a href="#">calcium</a>                                                      | RT |  | 7     | 9.5E-1  | 1.0EO     |
| <input type="checkbox"/> | INTERPRO           | <a href="#">Calcium-binding EF-hand</a>                                      | RT |  | 5     | 9.6E-1  | 1.0EO     |
| <input type="checkbox"/> | SMART              | <a href="#">EFh</a>                                                          | RT |  | 5     | 9.7E-1  | 1.0EO     |
| <input type="checkbox"/> | INTERPRO           | <a href="#">Molecular chaperone, heat shock protein, Hsp40, DnaJ</a>         | RT |  | 4     | 8.8E-1  | 1.0EO     |
| <input type="checkbox"/> | GOTERM_MF_FAT      | <a href="#">heat shock protein binding</a>                                   | RT |  | 4     | 9.3E-1  | 1.0EO     |
| <input type="checkbox"/> | INTERPRO           | <a href="#">Heat shock protein DnaJ, N-terminal</a>                          | RT |  | 4     | 9.4E-1  | 1.0EO     |
| <input type="checkbox"/> | SMART              | <a href="#">DnaJ</a>                                                         | RT |  | 4     | 9.5E-1  | 1.0EO     |
| <input type="checkbox"/> | INTERPRO           | <a href="#">Nucleotide-binding, alpha-beta plait</a>                         | RT |  | 8     | 9.2E-1  | 1.0EO     |
| <input type="checkbox"/> | INTERPRO           | <a href="#">RNA recognition motif, RNP-1</a>                                 | RT |  | 7     | 9.2E-1  | 1.0EO     |
| <input type="checkbox"/> | SMART              | <a href="#">RRM</a>                                                          | RT |  | 7     | 9.4E-1  | 1.0EO     |
| <input type="checkbox"/> | INTERPRO           | <a href="#">Acyl-CoA N-acyltransferase</a>                                   | RT |  | 6     | 8.0E-1  | 1.0EO     |
| <input type="checkbox"/> | SP_PIR_KEYWORDS    | <a href="#">Acyltransferase</a>                                              | RT |  | 6     | 8.7E-1  | 9.9E-1    |
| <input type="checkbox"/> | GOTERM_MF_FAT      | <a href="#">N-acyltransferase activity</a>                                   | RT |  | 4     | 9.8E-1  | 1.0EO     |
| <input type="checkbox"/> | GOTERM_MF_FAT      | <a href="#">acetyltransferase activity</a>                                   | RT |  | 4     | 9.8E-1  | 1.0EO     |
| <input type="checkbox"/> | GOTERM_MF_FAT      | <a href="#">N-acetyltransferase activity</a>                                 | RT |  | 3     | 9.9E-1  | 1.0EO     |

| <input type="checkbox"/> | Annotation Cluster                       | Term                                                                        | RT | Count | P_Value | Benjamini |
|--------------------------|------------------------------------------|-----------------------------------------------------------------------------|----|-------|---------|-----------|
| <input type="checkbox"/> | INTERPRO<br>Annotation Cluster 75        | <a href="#">GCN5-related N-acetyltransferase</a>                            | RT | 3     | 9.9E-1  | 1.0E0     |
|                          |                                          | Enrichment Score: 0.03                                                      |    |       |         |           |
| <input type="checkbox"/> | INTERPRO                                 | <a href="#">Like-Sm ribonucleoprotein_core</a>                              | RT | 6     | 8.7E-1  | 1.0E0     |
| <input type="checkbox"/> | INTERPRO                                 | <a href="#">Like-Sm ribonucleoprotein, eukaryotic and archaea-type_core</a> | RT | 3     | 9.8E-1  | 1.0E0     |
| <input type="checkbox"/> | SMART<br>Annotation Cluster 76           | <a href="#">Sm</a>                                                          | RT | 3     | 9.8E-1  | 1.0E0     |
|                          |                                          | Enrichment Score: 0.01                                                      |    |       |         |           |
| <input type="checkbox"/> | GOTERM_MF_FAT                            | <a href="#">RNA-directed DNA polymerase activity</a>                        | RT | 11    | 9.5E-1  | 1.0E0     |
| <input type="checkbox"/> | SP_PIR_KEYWORDS                          | <a href="#">Endonuclease</a>                                                | RT | 14    | 9.6E-1  | 1.0E0     |
| <input type="checkbox"/> | GOTERM_MF_FAT                            | <a href="#">nuclease activity</a>                                           | RT | 23    | 9.7E-1  | 1.0E0     |
| <input type="checkbox"/> | GOTERM_MF_FAT                            | <a href="#">endonuclease activity</a>                                       | RT | 15    | 9.8E-1  | 1.0E0     |
| <input type="checkbox"/> | GOTERM_MF_FAT                            | <a href="#">DNA polymerase activity</a>                                     | RT | 15    | 9.8E-1  | 1.0E0     |
| <input type="checkbox"/> | SP_PIR_KEYWORDS<br>Annotation Cluster 77 | <a href="#">rna-directed dna polymerase</a>                                 | RT | 10    | 9.8E-1  | 1.0E0     |
|                          |                                          | Enrichment Score: 0.01                                                      |    |       |         |           |
| <input type="checkbox"/> | GOTERM_BP_FAT                            | <a href="#">ribosome biogenesis</a>                                         | RT | 9     | 9.6E-1  | 1.0E0     |
| <input type="checkbox"/> | GOTERM_BP_FAT                            | <a href="#">ribonucleoprotein complex biogenesis</a>                        | RT | 9     | 9.6E-1  | 1.0E0     |
| <input type="checkbox"/> | GOTERM_BP_FAT                            | <a href="#">rRNA processing</a>                                             | RT | 5     | 9.8E-1  | 1.0E0     |
| <input type="checkbox"/> | GOTERM_BP_FAT                            | <a href="#">rRNA metabolic process</a>                                      | RT | 5     | 9.8E-1  | 1.0E0     |
| <input type="checkbox"/> | GOTERM_BP_FAT                            | <a href="#">ncRNA processing</a>                                            | RT | 11    | 1.0E0   | 1.0E0     |
|                          |                                          | Enrichment Score: 0.01                                                      |    |       |         |           |
| <input type="checkbox"/> | INTERPRO                                 | <a href="#">Ubiquitin</a>                                                   | RT | 3     | 9.8E-1  | 1.0E0     |
| <input type="checkbox"/> | INTERPRO                                 | <a href="#">Ubiquitin supergroup</a>                                        | RT | 5     | 9.8E-1  | 1.0E0     |
| <input type="checkbox"/> | SMART<br>Annotation Cluster 79           | <a href="#">UBQ</a>                                                         | RT | 3     | 9.8E-1  | 1.0E0     |
|                          |                                          | Enrichment Score: 0.01                                                      |    |       |         |           |
| <input type="checkbox"/> | GOTERM_BP_FAT                            | <a href="#">ncRNA metabolic process</a>                                     | RT | 25    | 9.5E-1  | 1.0E0     |
| <input type="checkbox"/> | GOTERM_BP_FAT                            | <a href="#">tRNA processing</a>                                             | RT | 6     | 9.9E-1  | 1.0E0     |
| <input type="checkbox"/> | GOTERM_BP_FAT                            | <a href="#">ncRNA processing</a>                                            | RT | 11    | 1.0E0   | 1.0E0     |
| <input type="checkbox"/> | GOTERM_BP_FAT                            | <a href="#">RNA processing</a>                                              | RT | 16    | 1.0E0   | 1.0E0     |

were not clustered.

Please cite [Nature Protocols 2009; 4\(1\):44](#) & [Genome Biology 2003; 4\(5\):P3](#) within any publication that makes use of any methods inspired by DAVID.

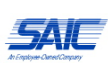

SAIC Frederick  
A Division of Science Applications  
International Corporation

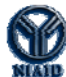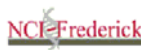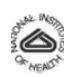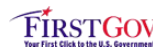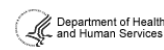

[Term of Service](#) | [Contact Us](#) | [Site Map](#)

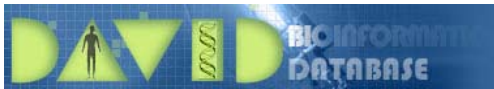

## Functional Annotation Clustering

[Help and Manual](#)

Current Gene List: 3\_Random3

Current Background: Giardia intestinalis

3000 DAVID IDs

Options Classification Stringency Medium

Rerun using options

Create Sublist

75 Cluster(s)

[Download File](#)

|                          | Annotation Cluster | Enrichment Score                                                 |    | Count | P_Value | Benjamini |
|--------------------------|--------------------|------------------------------------------------------------------|----|-------|---------|-----------|
| <input type="checkbox"/> | INTERPRO           | <a href="#">EGF-like, laminin</a>                                | RT | 20    | 8.3E-2  | 1.0EO     |
| <input type="checkbox"/> | SMART              | <a href="#">EGF_Lam</a>                                          | RT | 20    | 9.0E-2  | 1.0EO     |
| <input type="checkbox"/> | INTERPRO           | <a href="#">EGF-like_type 3</a>                                  | RT | 21    | 3.7E-1  | 1.0EO     |
| Annotation Cluster 2     |                    | Enrichment Score: 0.85                                           |    | Count | P_Value | Benjamini |
| <input type="checkbox"/> | GOTERM_MF_FAT      | <a href="#">ATPase activity, coupled</a>                         | RT | 50    | 2.5E-2  | 1.0EO     |
| <input type="checkbox"/> | SP_PIR_KEYWORDS    | <a href="#">helicase</a>                                         | RT | 32    | 6.0E-2  | 1.0EO     |
| <input type="checkbox"/> | GOTERM_MF_FAT      | <a href="#">helicase activity</a>                                | RT | 38    | 7.5E-2  | 1.0EO     |
| <input type="checkbox"/> | GOTERM_MF_FAT      | <a href="#">ATPase activity</a>                                  | RT | 62    | 1.0E-1  | 1.0EO     |
| <input type="checkbox"/> | INTERPRO           | <a href="#">Helicase, superfamily 1 and 2, ATP-binding</a>       | RT | 30    | 1.3E-1  | 1.0EO     |
| <input type="checkbox"/> | INTERPRO           | <a href="#">DNA/RNA helicase, C-terminal</a>                     | RT | 30    | 1.8E-1  | 1.0EO     |
| <input type="checkbox"/> | SMART              | <a href="#">HELICc</a>                                           | RT | 30    | 1.9E-1  | 1.0EO     |
| <input type="checkbox"/> | INTERPRO           | <a href="#">RNA helicase, DEAD-box type, Q motif</a>             | RT | 13    | 2.1E-1  | 1.0EO     |
| <input type="checkbox"/> | INTERPRO           | <a href="#">DEAD-like helicase, N-terminal</a>                   | RT | 29    | 2.1E-1  | 1.0EO     |
| <input type="checkbox"/> | GOTERM_MF_FAT      | <a href="#">purine NTP-dependent helicase activity</a>           | RT | 26    | 2.1E-1  | 1.0EO     |
| <input type="checkbox"/> | GOTERM_MF_FAT      | <a href="#">ATP-dependent helicase activity</a>                  | RT | 26    | 2.1E-1  | 1.0EO     |
| <input type="checkbox"/> | SMART              | <a href="#">DEXDc</a>                                            | RT | 29    | 2.3E-1  | 1.0EO     |
| <input type="checkbox"/> | INTERPRO           | <a href="#">DNA/RNA helicase, DEAD/DEAH box type, N-terminal</a> | RT | 20    | 3.4E-1  | 1.0EO     |
| Annotation Cluster 3     |                    | Enrichment Score: 0.67                                           |    | Count | P_Value | Benjamini |
| <input type="checkbox"/> | GOTERM_BP_FAT      | <a href="#">monosaccharide metabolic process</a>                 | RT | 17    | 1.2E-1  | 1.0EO     |
| <input type="checkbox"/> | GOTERM_BP_FAT      | <a href="#">hexose metabolic process</a>                         | RT | 15    | 1.4E-1  | 1.0EO     |
| <input type="checkbox"/> | GOTERM_BP_FAT      | <a href="#">glucose metabolic process</a>                        | RT | 15    | 1.4E-1  | 1.0EO     |
| <input type="checkbox"/> | GOTERM_BP_FAT      | <a href="#">hexose catabolic process</a>                         | RT | 11    | 1.8E-1  | 1.0EO     |
| <input type="checkbox"/> | GOTERM_BP_FAT      | <a href="#">monosaccharide catabolic process</a>                 | RT | 11    | 1.8E-1  | 1.0EO     |
| <input type="checkbox"/> | GOTERM_BP_FAT      | <a href="#">glucose catabolic process</a>                        | RT | 11    | 1.8E-1  | 1.0EO     |
| <input type="checkbox"/> | GOTERM_BP_FAT      | <a href="#">cellular carbohydrate catabolic process</a>          | RT | 11    | 1.8E-1  | 1.0EO     |
| <input type="checkbox"/> | GOTERM_BP_FAT      | <a href="#">alcohol catabolic process</a>                        | RT | 11    | 1.8E-1  | 1.0EO     |
| <input type="checkbox"/> | GOTERM_BP_FAT      | <a href="#">carbohydrate catabolic process</a>                   | RT | 11    | 1.8E-1  | 1.0EO     |
| <input type="checkbox"/> | GOTERM_BP_FAT      | <a href="#">generation of precursor metabolites and energy</a>   | RT | 17    | 3.4E-1  | 1.0EO     |
| <input type="checkbox"/> | GOTERM_BP_FAT      | <a href="#">glycolysis</a>                                       | RT | 8     | 4.1E-1  | 1.0EO     |
| <input type="checkbox"/> | SP_PIR_KEYWORDS    | <a href="#">glycolysis</a>                                       | RT | 4     | 7.9E-1  | 1.0EO     |
| Annotation Cluster 4     |                    | Enrichment Score: 0.66                                           |    | Count | P_Value | Benjamini |
| <input type="checkbox"/> | INTERPRO           | <a href="#">EF-HAND 1</a>                                        | RT | 16    | 9.1E-2  | 1.0EO     |
| <input type="checkbox"/> | INTERPRO           | <a href="#">EF-HAND 2</a>                                        | RT | 14    | 9.3E-2  | 1.0EO     |
| <input type="checkbox"/> | INTERPRO           | <a href="#">EF-Hand type</a>                                     | RT | 14    | 1.6E-1  | 1.0EO     |
| <input type="checkbox"/> | SP_PIR_KEYWORDS    | <a href="#">calcium</a>                                          | RT | 12    | 1.7E-1  | 1.0EO     |
| <input type="checkbox"/> | GOTERM_MF_FAT      | <a href="#">calcium ion binding</a>                              | RT | 29    | 2.2E-1  | 1.0EO     |
| <input type="checkbox"/> | INTERPRO           | <a href="#">Calcium-binding EF-hand</a>                          | RT | 8     | 4.8E-1  | 1.0EO     |
| <input type="checkbox"/> | INTERPRO           | <a href="#">EF hand</a>                                          | RT | 8     | 4.8E-1  | 1.0EO     |
| <input type="checkbox"/> | SMART              | <a href="#">EFh</a>                                              | RT | 8     | 4.9E-1  | 1.0EO     |
| Annotation Cluster 5     |                    | Enrichment Score: 0.6                                            |    | Count | P_Value | Benjamini |
| <input type="checkbox"/> | GOTERM_MF_FAT      | <a href="#">DNA polymerase activity</a>                          | RT | 26    | 4.6E-2  | 1.0EO     |
| <input type="checkbox"/> | GOTERM_MF_FAT      | <a href="#">nucleotidyltransferase activity</a>                  | RT | 47    | 1.9E-1  | 1.0EO     |
| <input type="checkbox"/> | GOTERM_MF_FAT      | <a href="#">RNA-directed DNA polymerase activity</a>             | RT | 17    | 2.6E-1  | 1.0EO     |
| <input type="checkbox"/> | SP_PIR_KEYWORDS    | <a href="#">rna-directed dna polymerase</a>                      | RT | 16    | 3.2E-1  | 1.0EO     |
| <input type="checkbox"/> | GOTERM_MF_FAT      | <a href="#">endonuclease activity</a>                            | RT | 22    | 4.0E-1  | 1.0EO     |

| <input type="checkbox"/> |                      |                                                                                                                |    |  | Count | P_Value | Benjamini |
|--------------------------|----------------------|----------------------------------------------------------------------------------------------------------------|----|--|-------|---------|-----------|
| <input type="checkbox"/> | GOTERM_MF_FAT        | <a href="#">nuclease activity</a>                                                                              | RT |  | 31    | 4.6E-1  | 1.0E0     |
| <input type="checkbox"/> | SP_PIR_KEYWORDS      | <a href="#">Endonuclease</a>                                                                                   | RT |  | 19    | 4.9E-1  | 9.9E-1    |
|                          | Annotation Cluster 6 | Enrichment Score: 0.57                                                                                         |    |  | Count | P_Value | Benjamini |
| <input type="checkbox"/> | INTERPRO             | <a href="#">WD40 repeat, subgroup</a>                                                                          | RT |  | 38    | 1.3E-1  | 1.0E0     |
| <input type="checkbox"/> | INTERPRO             | <a href="#">WD40 repeat 2</a>                                                                                  | RT |  | 29    | 2.1E-1  | 1.0E0     |
| <input type="checkbox"/> | INTERPRO             | <a href="#">WD40 repeat, region</a>                                                                            | RT |  | 31    | 2.5E-1  | 1.0E0     |
| <input type="checkbox"/> | INTERPRO             | <a href="#">WD40/YVTN repeat-like</a>                                                                          | RT |  | 46    | 2.5E-1  | 1.0E0     |
| <input type="checkbox"/> | SP_PIR_KEYWORDS      | <a href="#">wd repeat</a>                                                                                      | RT |  | 32    | 2.7E-1  | 1.0E0     |
| <input type="checkbox"/> | INTERPRO             | <a href="#">WD40 repeat</a>                                                                                    | RT |  | 46    | 3.5E-1  | 1.0E0     |
| <input type="checkbox"/> | SMART                | <a href="#">WD40</a>                                                                                           | RT |  | 46    | 3.8E-1  | 1.0E0     |
| <input type="checkbox"/> | INTERPRO             | <a href="#">WD40 repeat, conserved site</a>                                                                    | RT |  | 19    | 4.0E-1  | 1.0E0     |
|                          | Annotation Cluster 7 | Enrichment Score: 0.5                                                                                          |    |  | Count | P_Value | Benjamini |
| <input type="checkbox"/> | GOTERM_BP_FAT        | <a href="#">nucleobase, nucleoside and nucleotide biosynthetic process</a>                                     | RT |  | 30    | 5.0E-2  | 1.0E0     |
| <input type="checkbox"/> | GOTERM_BP_FAT        | <a href="#">nucleobase, nucleoside, nucleotide and nucleic acid biosynthetic process</a>                       | RT |  | 30    | 5.0E-2  | 1.0E0     |
| <input type="checkbox"/> | GOTERM_BP_FAT        | <a href="#">nucleotide biosynthetic process</a>                                                                | RT |  | 27    | 1.0E-1  | 1.0E0     |
| <input type="checkbox"/> | GOTERM_BP_FAT        | <a href="#">nitrogen compound biosynthetic process</a>                                                         | RT |  | 33    | 1.0E-1  | 1.0E0     |
| <input type="checkbox"/> | GOTERM_BP_FAT        | <a href="#">nucleoside triphosphate biosynthetic process</a>                                                   | RT |  | 19    | 1.6E-1  | 1.0E0     |
| <input type="checkbox"/> | GOTERM_BP_FAT        | <a href="#">nucleoside triphosphate metabolic process</a>                                                      | RT |  | 19    | 1.6E-1  | 1.0E0     |
| <input type="checkbox"/> | GOTERM_BP_FAT        | <a href="#">ribonucleoside triphosphate biosynthetic process</a>                                               | RT |  | 19    | 1.6E-1  | 1.0E0     |
| <input type="checkbox"/> | GOTERM_BP_FAT        | <a href="#">purine ribonucleoside triphosphate metabolic process</a>                                           | RT |  | 19    | 1.6E-1  | 1.0E0     |
| <input type="checkbox"/> | GOTERM_BP_FAT        | <a href="#">ribonucleoside triphosphate metabolic process</a>                                                  | RT |  | 19    | 1.6E-1  | 1.0E0     |
| <input type="checkbox"/> | GOTERM_BP_FAT        | <a href="#">purine nucleoside triphosphate metabolic process</a>                                               | RT |  | 19    | 1.6E-1  | 1.0E0     |
| <input type="checkbox"/> | GOTERM_BP_FAT        | <a href="#">purine nucleoside triphosphate biosynthetic process</a>                                            | RT |  | 19    | 1.6E-1  | 1.0E0     |
| <input type="checkbox"/> | GOTERM_BP_FAT        | <a href="#">purine ribonucleoside triphosphate biosynthetic process</a>                                        | RT |  | 19    | 1.6E-1  | 1.0E0     |
| <input type="checkbox"/> | GOTERM_BP_FAT        | <a href="#">purine nucleotide biosynthetic process</a>                                                         | RT |  | 20    | 1.8E-1  | 1.0E0     |
| <input type="checkbox"/> | GOTERM_MF_FAT        | <a href="#">ATPase activity, coupled to transmembrane movement of substances</a>                               | RT |  | 20    | 2.0E-1  | 1.0E0     |
| <input type="checkbox"/> | GOTERM_MF_FAT        | <a href="#">ATPase activity, coupled to movement of substances</a>                                             | RT |  | 20    | 2.0E-1  | 1.0E0     |
| <input type="checkbox"/> | GOTERM_MF_FAT        | <a href="#">P-P-bond-hydrolysis-driven transmembrane transporter activity</a>                                  | RT |  | 21    | 2.2E-1  | 1.0E0     |
| <input type="checkbox"/> | GOTERM_MF_FAT        | <a href="#">primary active transmembrane transporter activity</a>                                              | RT |  | 21    | 2.2E-1  | 1.0E0     |
| <input type="checkbox"/> | GOTERM_MF_FAT        | <a href="#">hydrolase activity, acting on acid anhydrides, catalyzing transmembrane movement of substances</a> | RT |  | 21    | 2.2E-1  | 1.0E0     |
| <input type="checkbox"/> | GOTERM_BP_FAT        | <a href="#">purine ribonucleotide metabolic process</a>                                                        | RT |  | 19    | 2.3E-1  | 1.0E0     |
| <input type="checkbox"/> | GOTERM_BP_FAT        | <a href="#">purine ribonucleotide biosynthetic process</a>                                                     | RT |  | 19    | 2.3E-1  | 1.0E0     |
| <input type="checkbox"/> | GOTERM_BP_FAT        | <a href="#">ribonucleotide biosynthetic process</a>                                                            | RT |  | 19    | 2.3E-1  | 1.0E0     |
| <input type="checkbox"/> | GOTERM_BP_FAT        | <a href="#">ribonucleotide metabolic process</a>                                                               | RT |  | 19    | 2.3E-1  | 1.0E0     |
| <input type="checkbox"/> | GOTERM_BP_FAT        | <a href="#">purine nucleotide metabolic process</a>                                                            | RT |  | 20    | 2.5E-1  | 1.0E0     |
| <input type="checkbox"/> | GOTERM_BP_FAT        | <a href="#">ATP metabolic process</a>                                                                          | RT |  | 17    | 2.6E-1  | 1.0E0     |
| <input type="checkbox"/> | GOTERM_BP_FAT        | <a href="#">ATP biosynthetic process</a>                                                                       | RT |  | 17    | 2.6E-1  | 1.0E0     |
| <input type="checkbox"/> | GOTERM_BP_FAT        | <a href="#">generation of precursor metabolites and energy</a>                                                 | RT |  | 17    | 3.4E-1  | 1.0E0     |
| <input type="checkbox"/> | GOTERM_MF_FAT        | <a href="#">ATPase activity, coupled to transmembrane movement of ions</a>                                     | RT |  | 14    | 3.5E-1  | 1.0E0     |
| <input type="checkbox"/> | GOTERM_BP_FAT        | <a href="#">transmembrane transport</a>                                                                        | RT |  | 14    | 3.6E-1  | 1.0E0     |
| <input type="checkbox"/> | INTERPRO             | <a href="#">ATPase, P-type, K/Mg/Cd/Cu/Zn/Na/Ca/Na/H-transporter</a>                                           | RT |  | 9     | 3.8E-1  | 1.0E0     |
| <input type="checkbox"/> | GOTERM_MF_FAT        | <a href="#">ATPase activity, coupled to transmembrane movement of ions, phosphorylative mechanism</a>          | RT |  | 9     | 3.9E-1  | 1.0E0     |
| <input type="checkbox"/> | GOTERM_BP_FAT        | <a href="#">hydrogen transport</a>                                                                             | RT |  | 10    | 4.7E-1  | 1.0E0     |
| <input type="checkbox"/> | GOTERM_BP_FAT        | <a href="#">proton transport</a>                                                                               | RT |  | 10    | 4.7E-1  | 1.0E0     |
| <input type="checkbox"/> | INTERPRO             | <a href="#">ATPase, P-type, ATPase-associated region</a>                                                       | RT |  | 8     | 4.8E-1  | 1.0E0     |
| <input type="checkbox"/> | GOTERM_MF_FAT        | <a href="#">inorganic cation transmembrane transporter activity</a>                                            | RT |  | 12    | 5.0E-1  | 1.0E0     |
| <input type="checkbox"/> | GOTERM_CC_FAT        | <a href="#">proton-transporting two-sector ATPase complex</a>                                                  | RT |  | 10    | 5.5E-1  | 1.0E0     |
| <input type="checkbox"/> | GOTERM_MF_FAT        | <a href="#">hydrogen ion transmembrane transporter activity</a>                                                | RT |  | 10    | 5.5E-1  | 1.0E0     |
| <input type="checkbox"/> | GOTERM_MF_FAT        | <a href="#">monovalent inorganic cation transmembrane transporter activity</a>                                 | RT |  | 10    | 5.5E-1  | 1.0E0     |
| <input type="checkbox"/> | GOTERM_BP_FAT        | <a href="#">ion transmembrane transport</a>                                                                    | RT |  | 9     | 5.6E-1  | 1.0E0     |
| <input type="checkbox"/> | GOTERM_BP_FAT        | <a href="#">monovalent inorganic cation transport</a>                                                          | RT |  | 10    | 5.8E-1  | 1.0E0     |

|                          |                 |                                                                                           |    |  |       |         |           |
|--------------------------|-----------------|-------------------------------------------------------------------------------------------|----|--|-------|---------|-----------|
| <input type="checkbox"/> | GOTERM_BP_FAT   | <a href="#">oxidative phosphorylation</a>                                                 | RT |  | 8     | 6.6E-1  | 1.0E0     |
| <input type="checkbox"/> | GOTERM_BP_FAT   | <a href="#">ATP synthesis coupled proton transport</a>                                    | RT |  | 8     | 6.6E-1  | 1.0E0     |
| <input type="checkbox"/> | GOTERM_BP_FAT   | <a href="#">energy coupled proton transport, down electrochemical gradient</a>            | RT |  | 8     | 6.6E-1  | 1.0E0     |
| <input type="checkbox"/> | GOTERM_MF_FAT   | <a href="#">proton-transporting ATPase activity, rotational mechanism</a>                 | RT |  | 5     | 6.7E-1  | 1.0E0     |
| <input type="checkbox"/> | GOTERM_CC_FAT   | <a href="#">proton-transporting V-type ATPase complex</a>                                 | RT |  | 6     | 7.0E-1  | 1.0E0     |
| <input type="checkbox"/> | KEGG_PATHWAY    | <a href="#">Oxidative phosphorylation</a>                                                 | RT |  | 8     | 7.2E-1  | 1.0E0     |
| <input type="checkbox"/> | GOTERM_BP_FAT   | <a href="#">ion transport</a>                                                             | RT |  | 13    | 7.8E-1  | 1.0E0     |
| <input type="checkbox"/> | GOTERM_BP_FAT   | <a href="#">cation transport</a>                                                          | RT |  | 13    | 7.8E-1  | 1.0E0     |
| <input type="checkbox"/> | GOTERM_CC_FAT   | <a href="#">proton-transporting two-sector ATPase complex, proton-transporting domain</a> | RT |  | 4     | 8.0E-1  | 1.0E0     |
| <input type="checkbox"/> | GOTERM_CC_FAT   | <a href="#">proton-transporting two-sector ATPase complex, catalytic domain</a>           | RT |  | 5     | 8.0E-1  | 1.0E0     |
| <input type="checkbox"/> | GOTERM_MF_FAT   | <a href="#">cation-transporting ATPase activity</a>                                       | RT |  | 6     | 8.0E-1  | 1.0E0     |
| <input type="checkbox"/> | GOTERM_CC_FAT   | <a href="#">proton-transporting V-type ATPase, VO domain</a>                              | RT |  | 3     | 9.0E-1  | 1.0E0     |
| Annotation Cluster 8     |                 | Enrichment Score: 0.46                                                                    |    |  | Count | P_Value | Benjamini |
| <input type="checkbox"/> | INTERPRO        | <a href="#">Pumilio RNA-binding region</a>                                                | RT |  | 5     | 3.0E-1  | 1.0E0     |
| <input type="checkbox"/> | SMART           | <a href="#">Pumilio</a>                                                                   | RT |  | 5     | 3.1E-1  | 1.0E0     |
| <input type="checkbox"/> | INTERPRO        | <a href="#">Armadillo-like helical</a>                                                    | RT |  | 14    | 4.5E-1  | 1.0E0     |
| Annotation Cluster 9     |                 | Enrichment Score: 0.43                                                                    |    |  | Count | P_Value | Benjamini |
| <input type="checkbox"/> | GOTERM_CC_FAT   | <a href="#">intrinsic to membrane</a>                                                     | RT |  | 43    | 1.9E-1  | 1.0E0     |
| <input type="checkbox"/> | GOTERM_CC_FAT   | <a href="#">integral to membrane</a>                                                      | RT |  | 43    | 1.9E-1  | 1.0E0     |
| <input type="checkbox"/> | SP_PIR_KEYWORDS | <a href="#">membrane</a>                                                                  | RT |  | 18    | 3.8E-1  | 1.0E0     |
| <input type="checkbox"/> | SP_PIR_KEYWORDS | <a href="#">transmembrane</a>                                                             | RT |  | 18    | 6.4E-1  | 1.0E0     |
| <input type="checkbox"/> | INTERPRO        | <a href="#">Amino acid transporter, transmembrane</a>                                     | RT |  | 6     | 8.0E-1  | 1.0E0     |
| Annotation Cluster 10    |                 | Enrichment Score: 0.39                                                                    |    |  | Count | P_Value | Benjamini |
| <input type="checkbox"/> | GOTERM_MF_FAT   | <a href="#">endopeptidase activity</a>                                                    | RT |  | 31    | 2.0E-1  | 1.0E0     |
| <input type="checkbox"/> | GOTERM_MF_FAT   | <a href="#">peptidase activity</a>                                                        | RT |  | 51    | 2.0E-1  | 1.0E0     |
| <input type="checkbox"/> | GOTERM_BP_FAT   | <a href="#">proteolysis</a>                                                               | RT |  | 54    | 2.1E-1  | 1.0E0     |
| <input type="checkbox"/> | GOTERM_MF_FAT   | <a href="#">peptidase activity, acting on L-amino acid peptides</a>                       | RT |  | 44    | 2.3E-1  | 1.0E0     |
| <input type="checkbox"/> | SP_PIR_KEYWORDS | <a href="#">Protease</a>                                                                  | RT |  | 24    | 2.9E-1  | 1.0E0     |
| <input type="checkbox"/> | INTERPRO        | <a href="#">Peptidase, cysteine peptidase active site</a>                                 | RT |  | 19    | 4.9E-1  | 1.0E0     |
| <input type="checkbox"/> | INTERPRO        | <a href="#">Peptidase C1A, papain C-terminal</a>                                          | RT |  | 16    | 6.8E-1  | 1.0E0     |
| <input type="checkbox"/> | INTERPRO        | <a href="#">Peptidase C1A, papain</a>                                                     | RT |  | 16    | 6.8E-1  | 1.0E0     |
| <input type="checkbox"/> | SMART           | <a href="#">Pept_C1</a>                                                                   | RT |  | 16    | 7.0E-1  | 1.0E0     |
| <input type="checkbox"/> | GOTERM_MF_FAT   | <a href="#">cysteine-type endopeptidase activity</a>                                      | RT |  | 14    | 7.3E-1  | 1.0E0     |
| <input type="checkbox"/> | GOTERM_MF_FAT   | <a href="#">cysteine-type peptidase activity</a>                                          | RT |  | 17    | 7.7E-1  | 1.0E0     |
| Annotation Cluster 11    |                 | Enrichment Score: 0.38                                                                    |    |  | Count | P_Value | Benjamini |
| <input type="checkbox"/> | INTERPRO        | <a href="#">Small GTP-binding protein</a>                                                 | RT |  | 15    | 1.9E-1  | 1.0E0     |
| <input type="checkbox"/> | GOTERM_MF_FAT   | <a href="#">guanyl nucleotide binding</a>                                                 | RT |  | 31    | 3.2E-1  | 1.0E0     |
| <input type="checkbox"/> | GOTERM_MF_FAT   | <a href="#">GTP binding</a>                                                               | RT |  | 31    | 3.2E-1  | 1.0E0     |
| <input type="checkbox"/> | GOTERM_MF_FAT   | <a href="#">guanyl ribonucleotide binding</a>                                             | RT |  | 31    | 3.2E-1  | 1.0E0     |
| <input type="checkbox"/> | GOTERM_BP_FAT   | <a href="#">intracellular signaling cascade</a>                                           | RT |  | 14    | 3.6E-1  | 1.0E0     |
| <input type="checkbox"/> | GOTERM_BP_FAT   | <a href="#">small GTPase mediated signal transduction</a>                                 | RT |  | 11    | 3.8E-1  | 1.0E0     |
| <input type="checkbox"/> | SP_PIR_KEYWORDS | <a href="#">gtp-binding</a>                                                               | RT |  | 25    | 4.7E-1  | 9.9E-1    |
| <input type="checkbox"/> | INTERPRO        | <a href="#">Ras</a>                                                                       | RT |  | 8     | 6.1E-1  | 1.0E0     |
| <input type="checkbox"/> | INTERPRO        | <a href="#">Ras GTPase</a>                                                                | RT |  | 8     | 7.2E-1  | 1.0E0     |
| <input type="checkbox"/> | PIR_SUPERFAMILY | PIRSF001710:Ras-related protein Rab                                                       | RT |  | 4     | 7.7E-1  | 1.0E0     |
| Annotation Cluster 12    |                 | Enrichment Score: 0.38                                                                    |    |  | Count | P_Value | Benjamini |
| <input type="checkbox"/> | GOTERM_BP_FAT   | <a href="#">pyridine nucleotide metabolic process</a>                                     | RT |  | 6     | 1.7E-1  | 1.0E0     |
| <input type="checkbox"/> | GOTERM_BP_FAT   | <a href="#">oxidoreduction coenzyme metabolic process</a>                                 | RT |  | 6     | 1.7E-1  | 1.0E0     |
| <input type="checkbox"/> | GOTERM_BP_FAT   | <a href="#">secondary metabolic process</a>                                               | RT |  | 5     | 2.6E-1  | 1.0E0     |
| <input type="checkbox"/> | GOTERM_BP_FAT   | <a href="#">cellular amide metabolic process</a>                                          | RT |  | 5     | 2.6E-1  | 1.0E0     |
| <input type="checkbox"/> | GOTERM_BP_FAT   | <a href="#">nicotinamide metabolic process</a>                                            | RT |  | 5     | 2.6E-1  | 1.0E0     |
| <input type="checkbox"/> | GOTERM_BP_FAT   | <a href="#">alkaloid metabolic process</a>                                                | RT |  | 5     | 2.6E-1  | 1.0E0     |
| <input type="checkbox"/> | GOTERM_BP_FAT   | <a href="#">nicotinamide nucleotide metabolic process</a>                                 | RT |  | 5     | 2.6E-1  | 1.0E0     |
| <input type="checkbox"/> | GOTERM_BP_FAT   | <a href="#">coenzyme metabolic process</a>                                                | RT |  | 8     | 2.8E-1  | 1.0E0     |
| <input type="checkbox"/> | GOTERM_BP_FAT   | <a href="#">pyridine nucleotide biosynthetic process</a>                                  | RT |  | 4     | 4.0E-1  | 1.0E0     |
| <input type="checkbox"/> | GOTERM_BP_FAT   | <a href="#">cofactor metabolic process</a>                                                | RT |  | 8     | 5.4E-1  | 1.0E0     |
| <input type="checkbox"/> | GOTERM_BP_FAT   | <a href="#">nicotinamide nucleotide biosynthetic process</a>                              | RT |  | 3     | 5.8E-1  | 1.0E0     |

|                          |                 |                                                              |    |  |       |         |           |
|--------------------------|-----------------|--------------------------------------------------------------|----|--|-------|---------|-----------|
| <input type="checkbox"/> | GOTERM_BP_FAT   | <a href="#">NAD biosynthetic process</a>                     | RT |  | 3     | 5.8E-1  | 1.0E0     |
| <input type="checkbox"/> | GOTERM_BP_FAT   | <a href="#">NAD metabolic process</a>                        | RT |  | 3     | 5.8E-1  | 1.0E0     |
| <input type="checkbox"/> | GOTERM_BP_FAT   | <a href="#">vitamin metabolic process</a>                    | RT |  | 4     | 6.0E-1  | 1.0E0     |
| <input type="checkbox"/> | GOTERM_BP_FAT   | <a href="#">water-soluble vitamin metabolic process</a>      | RT |  | 4     | 6.0E-1  | 1.0E0     |
| <input type="checkbox"/> | GOTERM_BP_FAT   | <a href="#">water-soluble vitamin biosynthetic process</a>   | RT |  | 4     | 6.0E-1  | 1.0E0     |
| <input type="checkbox"/> | GOTERM_BP_FAT   | <a href="#">vitamin biosynthetic process</a>                 | RT |  | 4     | 6.0E-1  | 1.0E0     |
| <input type="checkbox"/> | GOTERM_BP_FAT   | <a href="#">coenzyme biosynthetic process</a>                | RT |  | 5     | 6.2E-1  | 1.0E0     |
| <input type="checkbox"/> | GOTERM_BP_FAT   | <a href="#">cofactor biosynthetic process</a>                | RT |  | 5     | 8.4E-1  | 1.0E0     |
| <input type="checkbox"/> | INTERPRO        | <a href="#">Rossmann-like alpha/beta/alpha sandwich fold</a> | RT |  | 9     | 9.5E-1  | 1.0E0     |
| Annotation Cluster 13    |                 | Enrichment Score: 0.35                                       |    |  | Count | P_Value | Benjamini |
| <input type="checkbox"/> | SP_PIR_KEYWORDS | <a href="#">flagellum</a>                                    | RT |  | 4     | 4.4E-1  | 1.0E0     |
| <input type="checkbox"/> | GOTERM_CC_FAT   | <a href="#">cell projection</a>                              | RT |  | 4     | 4.4E-1  | 1.0E0     |
| <input type="checkbox"/> | GOTERM_CC_FAT   | <a href="#">flagellum</a>                                    | RT |  | 4     | 4.4E-1  | 1.0E0     |
| Annotation Cluster 14    |                 | Enrichment Score: 0.32                                       |    |  | Count | P_Value | Benjamini |
| <input type="checkbox"/> | INTERPRO        | <a href="#">EGF, extracellular</a>                           | RT |  | 16    | 3.1E-1  | 1.0E0     |
| <input type="checkbox"/> | INTERPRO        | <a href="#">EGF-like, type 3</a>                             | RT |  | 21    | 3.7E-1  | 1.0E0     |
| <input type="checkbox"/> | SP_PIR_KEYWORDS | <a href="#">egf-like domain</a>                              | RT |  | 8     | 9.5E-1  | 1.0E0     |
| Annotation Cluster 15    |                 | Enrichment Score: 0.31                                       |    |  | Count | P_Value | Benjamini |
| <input type="checkbox"/> | INTERPRO        | <a href="#">Ankyrin</a>                                      | RT |  | 254   | 4.6E-1  | 1.0E0     |
| <input type="checkbox"/> | SP_PIR_KEYWORDS | <a href="#">ank repeat</a>                                   | RT |  | 179   | 4.8E-1  | 9.9E-1    |
| <input type="checkbox"/> | SMART           | <a href="#">ANK</a>                                          | RT |  | 254   | 5.6E-1  | 1.0E0     |
| Annotation Cluster 16    |                 | Enrichment Score: 0.28                                       |    |  | Count | P_Value | Benjamini |
| <input type="checkbox"/> | INTERPRO        | <a href="#">EGF-like</a>                                     | RT |  | 114   | 3.6E-1  | 1.0E0     |
| <input type="checkbox"/> | SMART           | <a href="#">EGF</a>                                          | RT |  | 114   | 4.1E-1  | 1.0E0     |
| <input type="checkbox"/> | INTERPRO        | <a href="#">Giardia variant-specific surface protein</a>     | RT |  | 136   | 6.2E-1  | 1.0E0     |
| <input type="checkbox"/> | INTERPRO        | <a href="#">Furin-like repeat</a>                            | RT |  | 106   | 6.3E-1  | 1.0E0     |
| <input type="checkbox"/> | SMART           | <a href="#">FU</a>                                           | RT |  | 106   | 6.9E-1  | 1.0E0     |
| Annotation Cluster 17    |                 | Enrichment Score: 0.28                                       |    |  | Count | P_Value | Benjamini |
| <input type="checkbox"/> | GOTERM_MF_FAT   | <a href="#">calcium ion binding</a>                          | RT |  | 29    | 2.2E-1  | 1.0E0     |
| <input type="checkbox"/> | INTERPRO        | <a href="#">Alpha giardin</a>                                | RT |  | 9     | 3.8E-1  | 1.0E0     |
| <input type="checkbox"/> | INTERPRO        | <a href="#">Annexin repeat</a>                               | RT |  | 10    | 4.2E-1  | 1.0E0     |
| <input type="checkbox"/> | SMART           | <a href="#">ANX</a>                                          | RT |  | 10    | 4.4E-1  | 1.0E0     |
| <input type="checkbox"/> | INTERPRO        | <a href="#">Annexin</a>                                      | RT |  | 11    | 4.6E-1  | 1.0E0     |
| <input type="checkbox"/> | SP_PIR_KEYWORDS | <a href="#">annexin</a>                                      | RT |  | 11    | 4.6E-1  | 1.0E0     |
| <input type="checkbox"/> | GOTERM_BP_FAT   | <a href="#">cytoskeleton organization</a>                    | RT |  | 9     | 7.6E-1  | 1.0E0     |
| <input type="checkbox"/> | GOTERM_MF_FAT   | <a href="#">calcium-dependent phospholipid binding</a>       | RT |  | 12    | 8.4E-1  | 1.0E0     |
| <input type="checkbox"/> | GOTERM_MF_FAT   | <a href="#">lipid binding</a>                                | RT |  | 19    | 8.8E-1  | 1.0E0     |
| <input type="checkbox"/> | GOTERM_MF_FAT   | <a href="#">phospholipid binding</a>                         | RT |  | 13    | 9.5E-1  | 1.0E0     |
| Annotation Cluster 18    |                 | Enrichment Score: 0.27                                       |    |  | Count | P_Value | Benjamini |
| <input type="checkbox"/> | GOTERM_BP_FAT   | <a href="#">microtubule-based movement</a>                   | RT |  | 30    | 2.4E-1  | 1.0E0     |
| <input type="checkbox"/> | GOTERM_MF_FAT   | <a href="#">motor activity</a>                               | RT |  | 27    | 3.7E-1  | 1.0E0     |
| <input type="checkbox"/> | GOTERM_MF_FAT   | <a href="#">microtubule motor activity</a>                   | RT |  | 27    | 3.7E-1  | 1.0E0     |
| <input type="checkbox"/> | INTERPRO        | <a href="#">Dynein heavy chain</a>                           | RT |  | 9     | 3.8E-1  | 1.0E0     |
| <input type="checkbox"/> | GOTERM_CC_FAT   | <a href="#">dynein complex</a>                               | RT |  | 9     | 3.8E-1  | 1.0E0     |
| <input type="checkbox"/> | COG_ONTOLOGY    | <a href="#">Cytoskeleton</a>                                 | RT |  | 14    | 5.2E-1  | 9.9E-1    |
| <input type="checkbox"/> | GOTERM_CC_FAT   | <a href="#">microtubule associated complex</a>               | RT |  | 10    | 5.5E-1  | 1.0E0     |
| <input type="checkbox"/> | GOTERM_BP_FAT   | <a href="#">microtubule-based process</a>                    | RT |  | 31    | 5.6E-1  | 1.0E0     |
| <input type="checkbox"/> | SP_PIR_KEYWORDS | <a href="#">motor protein</a>                                | RT |  | 15    | 5.8E-1  | 1.0E0     |
| <input type="checkbox"/> | GOTERM_CC_FAT   | <a href="#">microtubule</a>                                  | RT |  | 20    | 6.0E-1  | 1.0E0     |
| <input type="checkbox"/> | INTERPRO        | <a href="#">Kinesin, motor region</a>                        | RT |  | 17    | 6.1E-1  | 1.0E0     |
| <input type="checkbox"/> | SMART           | <a href="#">KISc</a>                                         | RT |  | 17    | 6.3E-1  | 1.0E0     |
| <input type="checkbox"/> | SP_PIR_KEYWORDS | <a href="#">microtubule</a>                                  | RT |  | 19    | 6.5E-1  | 1.0E0     |
| <input type="checkbox"/> | INTERPRO        | <a href="#">Kinesin, motor region, conserved site</a>        | RT |  | 11    | 6.7E-1  | 1.0E0     |
| <input type="checkbox"/> | GOTERM_CC_FAT   | <a href="#">cytoskeletal part</a>                            | RT |  | 30    | 7.0E-1  | 1.0E0     |
| <input type="checkbox"/> | GOTERM_CC_FAT   | <a href="#">microtubule cytoskeleton</a>                     | RT |  | 30    | 7.0E-1  | 1.0E0     |
| <input type="checkbox"/> | INTERPRO        | <a href="#">Dynein heavy chain, N-terminal region 2</a>      | RT |  | 7     | 7.1E-1  | 1.0E0     |
| <input type="checkbox"/> | GOTERM_CC_FAT   | <a href="#">cytoskeleton</a>                                 | RT |  | 30    | 8.1E-1  | 1.0E0     |
| Annotation Cluster 19    |                 | Enrichment Score: 0.26                                       |    |  | Count | P_Value | Benjamini |

| <input type="checkbox"/> | Category        | Term                                                                               | RT | Bar | Count | P-Value | Benjamini |
|--------------------------|-----------------|------------------------------------------------------------------------------------|----|-----|-------|---------|-----------|
| <input type="checkbox"/> | GOTERM_BP_FAT   | <a href="#">intracellular transport</a>                                            | RT |     | 18    | 3.6E-1  | 1.0E0     |
| <input type="checkbox"/> | GOTERM_BP_FAT   | <a href="#">cellular protein localization</a>                                      | RT |     | 15    | 3.8E-1  | 1.0E0     |
| <input type="checkbox"/> | GOTERM_BP_FAT   | <a href="#">cellular macromolecule localization</a>                                | RT |     | 15    | 3.8E-1  | 1.0E0     |
| <input type="checkbox"/> | GOTERM_BP_FAT   | <a href="#">intracellular protein transport</a>                                    | RT |     | 15    | 3.8E-1  | 1.0E0     |
| <input type="checkbox"/> | GOTERM_BP_FAT   | <a href="#">vesicle-mediated transport</a>                                         | RT |     | 17    | 6.0E-1  | 1.0E0     |
| <input type="checkbox"/> | GOTERM_CC_FAT   | <a href="#">coated membrane</a>                                                    | RT |     | 9     | 6.4E-1  | 1.0E0     |
| <input type="checkbox"/> | GOTERM_CC_FAT   | <a href="#">membrane coat</a>                                                      | RT |     | 9     | 6.4E-1  | 1.0E0     |
| <input type="checkbox"/> | GOTERM_BP_FAT   | <a href="#">protein localization</a>                                               | RT |     | 19    | 6.9E-1  | 1.0E0     |
| <input type="checkbox"/> | GOTERM_CC_FAT   | <a href="#">Golgi apparatus</a>                                                    | RT |     | 7     | 7.1E-1  | 1.0E0     |
| <input type="checkbox"/> | GOTERM_BP_FAT   | <a href="#">protein transport</a>                                                  | RT |     | 18    | 7.5E-1  | 1.0E0     |
| <input type="checkbox"/> | GOTERM_BP_FAT   | <a href="#">establishment of protein localization</a>                              | RT |     | 18    | 7.5E-1  | 1.0E0     |
| Annotation Cluster 20    |                 | Enrichment Score: 0.26                                                             |    |     | Count | P-Value | Benjamini |
| <input type="checkbox"/> | INTERPRO        | <a href="#">Aldolase-type TIM barrel</a>                                           | RT |     | 7     | 4.3E-1  | 1.0E0     |
| <input type="checkbox"/> | GOTERM_MF_FAT   | <a href="#">FAD binding</a>                                                        | RT |     | 5     | 5.1E-1  | 1.0E0     |
| <input type="checkbox"/> | PIR_SUPERFAMILY | PIRSF006621:Dus                                                                    | RT |     | 3     | 6.0E-1  | 1.0E0     |
| <input type="checkbox"/> | INTERPRO        | <a href="#">tRNA-dihydrouridine synthase</a>                                       | RT |     | 3     | 6.2E-1  | 1.0E0     |
| <input type="checkbox"/> | GOTERM_MF_FAT   | <a href="#">tRNA dihydrouridine synthase activity</a>                              | RT |     | 3     | 6.2E-1  | 1.0E0     |
| Annotation Cluster 21    |                 | Enrichment Score: 0.25                                                             |    |     | Count | P-Value | Benjamini |
| <input type="checkbox"/> | INTERPRO        | <a href="#">Protein phosphatase 2C, manganese/magnesium aspartate binding site</a> | RT |     | 4     | 4.4E-1  | 1.0E0     |
| <input type="checkbox"/> | SP_PIR_KEYWORDS | <a href="#">protein phosphatase</a>                                                | RT |     | 4     | 4.4E-1  | 1.0E0     |
| <input type="checkbox"/> | GOTERM_MF_FAT   | <a href="#">protein serine/threonine phosphatase activity</a>                      | RT |     | 4     | 4.4E-1  | 1.0E0     |
| <input type="checkbox"/> | INTERPRO        | <a href="#">Protein phosphatase 2C, N-terminal</a>                                 | RT |     | 5     | 5.0E-1  | 1.0E0     |
| <input type="checkbox"/> | INTERPRO        | <a href="#">Protein phosphatase 2C</a>                                             | RT |     | 5     | 5.0E-1  | 1.0E0     |
| <input type="checkbox"/> | INTERPRO        | <a href="#">Protein phosphatase 2C-related</a>                                     | RT |     | 5     | 5.0E-1  | 1.0E0     |
| <input type="checkbox"/> | SMART           | <a href="#">PP2C_SIG</a>                                                           | RT |     | 5     | 5.1E-1  | 1.0E0     |
| <input type="checkbox"/> | SMART           | <a href="#">PP2Cc</a>                                                              | RT |     | 5     | 5.1E-1  | 1.0E0     |
| <input type="checkbox"/> | GOTERM_MF_FAT   | <a href="#">magnesium ion binding</a>                                              | RT |     | 10    | 5.5E-1  | 1.0E0     |
| <input type="checkbox"/> | SP_PIR_KEYWORDS | <a href="#">magnesium</a>                                                          | RT |     | 8     | 6.1E-1  | 1.0E0     |
| <input type="checkbox"/> | GOTERM_BP_FAT   | <a href="#">dephosphorylation</a>                                                  | RT |     | 9     | 7.6E-1  | 1.0E0     |
| <input type="checkbox"/> | GOTERM_BP_FAT   | <a href="#">protein amino acid dephosphorylation</a>                               | RT |     | 7     | 8.3E-1  | 1.0E0     |
| <input type="checkbox"/> | GOTERM_CC_FAT   | <a href="#">protein serine/threonine phosphatase complex</a>                       | RT |     | 4     | 8.9E-1  | 1.0E0     |
| Annotation Cluster 22    |                 | Enrichment Score: 0.25                                                             |    |     | Count | P-Value | Benjamini |
| <input type="checkbox"/> | GOTERM_MF_FAT   | <a href="#">DNA-dependent ATPase activity</a>                                      | RT |     | 7     | 2.8E-1  | 1.0E0     |
| <input type="checkbox"/> | GOTERM_MF_FAT   | <a href="#">DNA helicase activity</a>                                              | RT |     | 4     | 8.0E-1  | 1.0E0     |
| <input type="checkbox"/> | GOTERM_MF_FAT   | <a href="#">ATP-dependent DNA helicase activity</a>                                | RT |     | 3     | 8.0E-1  | 1.0E0     |
| Annotation Cluster 23    |                 | Enrichment Score: 0.25                                                             |    |     | Count | P-Value | Benjamini |
| <input type="checkbox"/> | GOTERM_BP_FAT   | <a href="#">regulation of transcription, DNA-dependent</a>                         | RT |     | 8     | 5.4E-1  | 1.0E0     |
| <input type="checkbox"/> | GOTERM_BP_FAT   | <a href="#">regulation of RNA metabolic process</a>                                | RT |     | 8     | 5.4E-1  | 1.0E0     |
| <input type="checkbox"/> | GOTERM_BP_FAT   | <a href="#">regulation of transcription</a>                                        | RT |     | 18    | 6.1E-1  | 1.0E0     |
| Annotation Cluster 24    |                 | Enrichment Score: 0.25                                                             |    |     | Count | P-Value | Benjamini |
| <input type="checkbox"/> | GOTERM_BP_FAT   | <a href="#">tRNA processing</a>                                                    | RT |     | 13    | 1.6E-1  | 1.0E0     |
| <input type="checkbox"/> | GOTERM_BP_FAT   | <a href="#">ncRNA processing</a>                                                   | RT |     | 17    | 6.0E-1  | 1.0E0     |
| <input type="checkbox"/> | GOTERM_BP_FAT   | <a href="#">tRNA metabolic process</a>                                             | RT |     | 21    | 8.1E-1  | 1.0E0     |
| <input type="checkbox"/> | GOTERM_BP_FAT   | <a href="#">RNA processing</a>                                                     | RT |     | 24    | 8.2E-1  | 1.0E0     |
| <input type="checkbox"/> | GOTERM_BP_FAT   | <a href="#">ncRNA metabolic process</a>                                            | RT |     | 25    | 9.4E-1  | 1.0E0     |
| Annotation Cluster 25    |                 | Enrichment Score: 0.24                                                             |    |     | Count | P-Value | Benjamini |
| <input type="checkbox"/> | GOTERM_MF_FAT   | <a href="#">DNA-directed DNA polymerase activity</a>                               | RT |     | 9     | 1.4E-1  | 1.0E0     |
| <input type="checkbox"/> | INTERPRO        | <a href="#">DNA-directed DNA polymerase, family B</a>                              | RT |     | 4     | 6.5E-1  | 1.0E0     |
| <input type="checkbox"/> | SP_PIR_KEYWORDS | <a href="#">dna-directed dna polymerase</a>                                        | RT |     | 4     | 6.5E-1  | 1.0E0     |
| <input type="checkbox"/> | SMART           | <a href="#">POLBc</a>                                                              | RT |     | 4     | 6.6E-1  | 1.0E0     |
| <input type="checkbox"/> | INTERPRO        | <a href="#">DNA-directed DNA polymerase, family B, conserved region2</a>           | RT |     | 3     | 8.0E-1  | 1.0E0     |
| <input type="checkbox"/> | INTERPRO        | <a href="#">DNA-directed DNA polymerase, family B, conserved site</a>              | RT |     | 3     | 8.0E-1  | 1.0E0     |
| <input type="checkbox"/> | SP_PIR_KEYWORDS | <a href="#">dna replication</a>                                                    | RT |     | 6     | 8.0E-1  | 9.9E-1    |
| Annotation Cluster 26    |                 | Enrichment Score: 0.24                                                             |    |     | Count | P-Value | Benjamini |
| <input type="checkbox"/> | INTERPRO        | <a href="#">Nucleotide-binding, alpha-beta plait</a>                               | RT |     | 11    | 4.6E-1  | 1.0E0     |
| <input type="checkbox"/> | INTERPRO        | <a href="#">RNA recognition motif, RNP-1</a>                                       | RT |     | 9     | 6.3E-1  | 1.0E0     |
| <input type="checkbox"/> | SMART           | <a href="#">RRM</a>                                                                | RT |     | 9     | 6.5E-1  | 1.0E0     |

| Annotation Cluster 27    |                 | Enrichment Score: 0.23                                                              |    |  |  | Count | P_Value | Benjamini |
|--------------------------|-----------------|-------------------------------------------------------------------------------------|----|--|--|-------|---------|-----------|
| <input type="checkbox"/> | GOTERM_BP_FAT   | <a href="#">phospholipid metabolic process</a>                                      | RT |  |  | 9     | 3.2E-1  | 1.0E0     |
| <input type="checkbox"/> | GOTERM_BP_FAT   | <a href="#">phospholipid biosynthetic process</a>                                   | RT |  |  | 6     | 3.3E-1  | 1.0E0     |
| <input type="checkbox"/> | GOTERM_BP_FAT   | <a href="#">lipid biosynthetic process</a>                                          | RT |  |  | 10    | 3.5E-1  | 1.0E0     |
| <input type="checkbox"/> | GOTERM_BP_FAT   | <a href="#">organophosphate metabolic process</a>                                   | RT |  |  | 9     | 4.4E-1  | 1.0E0     |
| <input type="checkbox"/> | INTERPRO        | <a href="#">CDP-alcohol phosphatidyltransferase</a>                                 | RT |  |  | 3     | 6.2E-1  | 1.0E0     |
| <input type="checkbox"/> | GOTERM_MF_FAT   | <a href="#">phosphotransferase activity, for other substituted phosphate groups</a> | RT |  |  | 3     | 8.0E-1  | 1.0E0     |
| <input type="checkbox"/> | GOTERM_BP_FAT   | <a href="#">glycerolipid metabolic process</a>                                      | RT |  |  | 4     | 8.6E-1  | 1.0E0     |
| <input type="checkbox"/> | GOTERM_BP_FAT   | <a href="#">phosphoinositide metabolic process</a>                                  | RT |  |  | 4     | 8.6E-1  | 1.0E0     |
| <input type="checkbox"/> | GOTERM_BP_FAT   | <a href="#">glycerophospholipid metabolic process</a>                               | RT |  |  | 4     | 8.6E-1  | 1.0E0     |
| <input type="checkbox"/> | GOTERM_MF_FAT   | <a href="#">inositol or phosphatidylinositol kinase activity</a>                    | RT |  |  | 3     | 9.0E-1  | 1.0E0     |
| Annotation Cluster 28    |                 | Enrichment Score: 0.22                                                              |    |  |  | Count | P_Value | Benjamini |
| <input type="checkbox"/> | SP_PIR_KEYWORDS | <a href="#">dna-binding</a>                                                         | RT |  |  | 24    | 2.3E-1  | 1.0E0     |
| <input type="checkbox"/> | GOTERM_CC_FAT   | <a href="#">chromosomal part</a>                                                    | RT |  |  | 12    | 3.8E-1  | 1.0E0     |
| <input type="checkbox"/> | GOTERM_BP_FAT   | <a href="#">chromatin assembly or disassembly</a>                                   | RT |  |  | 9     | 4.4E-1  | 1.0E0     |
| <input type="checkbox"/> | GOTERM_CC_FAT   | <a href="#">protein-DNA complex</a>                                                 | RT |  |  | 9     | 5.2E-1  | 1.0E0     |
| <input type="checkbox"/> | GOTERM_CC_FAT   | <a href="#">chromosome</a>                                                          | RT |  |  | 17    | 5.4E-1  | 1.0E0     |
| <input type="checkbox"/> | GOTERM_BP_FAT   | <a href="#">cellular macromolecular complex subunit organization</a>                | RT |  |  | 15    | 5.7E-1  | 1.0E0     |
| <input type="checkbox"/> | GOTERM_BP_FAT   | <a href="#">macromolecular complex subunit organization</a>                         | RT |  |  | 16    | 5.8E-1  | 1.0E0     |
| <input type="checkbox"/> | GOTERM_CC_FAT   | <a href="#">chromatin</a>                                                           | RT |  |  | 8     | 6.2E-1  | 1.0E0     |
| <input type="checkbox"/> | INTERPRO        | <a href="#">Histone-fold</a>                                                        | RT |  |  | 9     | 6.3E-1  | 1.0E0     |
| <input type="checkbox"/> | GOTERM_BP_FAT   | <a href="#">cellular macromolecular complex assembly</a>                            | RT |  |  | 14    | 6.4E-1  | 1.0E0     |
| <input type="checkbox"/> | GOTERM_BP_FAT   | <a href="#">protein-DNA complex assembly</a>                                        | RT |  |  | 7     | 6.5E-1  | 1.0E0     |
| <input type="checkbox"/> | GOTERM_BP_FAT   | <a href="#">DNA packaging</a>                                                       | RT |  |  | 7     | 6.5E-1  | 1.0E0     |
| <input type="checkbox"/> | GOTERM_BP_FAT   | <a href="#">nucleosome assembly</a>                                                 | RT |  |  | 7     | 6.5E-1  | 1.0E0     |
| <input type="checkbox"/> | GOTERM_BP_FAT   | <a href="#">nucleosome organization</a>                                             | RT |  |  | 7     | 6.5E-1  | 1.0E0     |
| <input type="checkbox"/> | GOTERM_BP_FAT   | <a href="#">chromatin assembly</a>                                                  | RT |  |  | 7     | 6.5E-1  | 1.0E0     |
| <input type="checkbox"/> | GOTERM_BP_FAT   | <a href="#">macromolecular complex assembly</a>                                     | RT |  |  | 15    | 6.5E-1  | 1.0E0     |
| <input type="checkbox"/> | SP_PIR_KEYWORDS | <a href="#">nucleosome core</a>                                                     | RT |  |  | 5     | 6.7E-1  | 1.0E0     |
| <input type="checkbox"/> | GOTERM_BP_FAT   | <a href="#">chromatin organization</a>                                              | RT |  |  | 9     | 6.7E-1  | 1.0E0     |
| <input type="checkbox"/> | INTERPRO        | <a href="#">Histone core</a>                                                        | RT |  |  | 7     | 7.1E-1  | 1.0E0     |
| <input type="checkbox"/> | SP_PIR_KEYWORDS | <a href="#">chromosomal protein</a>                                                 | RT |  |  | 7     | 7.1E-1  | 1.0E0     |
| <input type="checkbox"/> | GOTERM_CC_FAT   | <a href="#">nucleosome</a>                                                          | RT |  |  | 7     | 7.1E-1  | 1.0E0     |
| <input type="checkbox"/> | SP_PIR_KEYWORDS | <a href="#">nucleus</a>                                                             | RT |  |  | 19    | 7.8E-1  | 1.0E0     |
| <input type="checkbox"/> | GOTERM_BP_FAT   | <a href="#">chromosome organization</a>                                             | RT |  |  | 10    | 8.3E-1  | 1.0E0     |
| Annotation Cluster 29    |                 | Enrichment Score: 0.22                                                              |    |  |  | Count | P_Value | Benjamini |
| <input type="checkbox"/> | INTERPRO        | <a href="#">ATPase, AAA+ type, core</a>                                             | RT |  |  | 42    | 5.6E-1  | 1.0E0     |
| <input type="checkbox"/> | SMART           | <a href="#">AAA</a>                                                                 | RT |  |  | 42    | 6.0E-1  | 1.0E0     |
| <input type="checkbox"/> | INTERPRO        | <a href="#">ATPase, AAA-type, core</a>                                              | RT |  |  | 15    | 6.6E-1  | 1.0E0     |
| Annotation Cluster 30    |                 | Enrichment Score: 0.21                                                              |    |  |  | Count | P_Value | Benjamini |
| <input type="checkbox"/> | GOTERM_MF_FAT   | <a href="#">intramolecular transferase activity</a>                                 | RT |  |  | 8     | 4.8E-1  | 1.0E0     |
| <input type="checkbox"/> | PIR_SUPERFAMILY | PIRSF001430:tRNA_psdUrid_synth                                                      | RT |  |  | 3     | 6.0E-1  | 1.0E0     |
| <input type="checkbox"/> | INTERPRO        | <a href="#">Pseudouridine synthase I, TruA</a>                                      | RT |  |  | 3     | 6.2E-1  | 1.0E0     |
| <input type="checkbox"/> | GOTERM_BP_FAT   | <a href="#">pseudouridine synthesis</a>                                             | RT |  |  | 5     | 6.2E-1  | 1.0E0     |
| <input type="checkbox"/> | GOTERM_MF_FAT   | <a href="#">pseudouridine synthase activity</a>                                     | RT |  |  | 5     | 6.7E-1  | 1.0E0     |
| <input type="checkbox"/> | GOTERM_BP_FAT   | <a href="#">RNA modification</a>                                                    | RT |  |  | 9     | 7.6E-1  | 1.0E0     |
| Annotation Cluster 31    |                 | Enrichment Score: 0.21                                                              |    |  |  | Count | P_Value | Benjamini |
| <input type="checkbox"/> | INTERPRO        | <a href="#">ARF/SAR superfamily</a>                                                 | RT |  |  | 6     | 3.8E-1  | 1.0E0     |
| <input type="checkbox"/> | PIR_SUPERFAMILY | PIRSF001711:ADP-ribosylation factor                                                 | RT |  |  | 4     | 6.3E-1  | 1.0E0     |
| <input type="checkbox"/> | INTERPRO        | <a href="#">ADP-ribosylation factor</a>                                             | RT |  |  | 3     | 8.0E-1  | 1.0E0     |
| <input type="checkbox"/> | SMART           | <a href="#">ARF</a>                                                                 | RT |  |  | 3     | 8.0E-1  | 1.0E0     |
| Annotation Cluster 32    |                 | Enrichment Score: 0.2                                                               |    |  |  | Count | P_Value | Benjamini |
| <input type="checkbox"/> | GOTERM_BP_FAT   | <a href="#">nucleoside metabolic process</a>                                        | RT |  |  | 9     | 4.4E-1  | 1.0E0     |
| <input type="checkbox"/> | GOTERM_BP_FAT   | <a href="#">ribonucleoside metabolic process</a>                                    | RT |  |  | 5     | 6.2E-1  | 1.0E0     |
| <input type="checkbox"/> | GOTERM_BP_FAT   | <a href="#">purine nucleoside metabolic process</a>                                 | RT |  |  | 3     | 7.7E-1  | 1.0E0     |
| <input type="checkbox"/> | GOTERM_BP_FAT   | <a href="#">purine ribonucleoside metabolic process</a>                             | RT |  |  | 3     | 7.7E-1  | 1.0E0     |
| Annotation Cluster 33    |                 | Enrichment Score: 0.2                                                               |    |  |  | Count | P_Value | Benjamini |
| <input type="checkbox"/> | GOTERM_BP_FAT   | <a href="#">cellular response to stress</a>                                         | RT |  |  | 13    | 5.3E-1  | 1.0E0     |



| <input type="checkbox"/> |                       |                                                                                                       |    |  |  |  |       |         |           |
|--------------------------|-----------------------|-------------------------------------------------------------------------------------------------------|----|--|--|--|-------|---------|-----------|
| <input type="checkbox"/> | GOTERM_BP_FAT         | <a href="#">mismatch repair</a>                                                                       | RT |  |  |  | 4     | 6.0E-1  | 1.0E0     |
| <input type="checkbox"/> | GOTERM_BP_FAT         | <a href="#">DNA repair</a>                                                                            | RT |  |  |  | 12    | 6.1E-1  | 1.0E0     |
| <input type="checkbox"/> | GOTERM_BP_FAT         | <a href="#">response to DNA damage stimulus</a>                                                       | RT |  |  |  | 12    | 6.1E-1  | 1.0E0     |
| <input type="checkbox"/> | GOTERM_MF_FAT         | <a href="#">double-stranded DNA binding</a>                                                           | RT |  |  |  | 4     | 6.5E-1  | 1.0E0     |
| <input type="checkbox"/> | GOTERM_MF_FAT         | <a href="#">structure-specific DNA binding</a>                                                        | RT |  |  |  | 4     | 6.5E-1  | 1.0E0     |
| <input type="checkbox"/> | GOTERM_MF_FAT         | <a href="#">mismatched DNA binding</a>                                                                | RT |  |  |  | 4     | 6.5E-1  | 1.0E0     |
| <input type="checkbox"/> | KEGG_PATHWAY          | <a href="#">Mismatch repair</a>                                                                       | RT |  |  |  | 8     | 8.1E-1  | 9.9E-1    |
|                          | Annotation Cluster 34 | Enrichment Score: 0.18                                                                                |    |  |  |  | Count | P_Value | Benjamini |
| <input type="checkbox"/> | INTERPRO              | <a href="#">ATPase, P-type, K/Mg/Cd/Cu/Zn/Na/Ca/Na/H-transporter</a>                                  | RT |  |  |  | 9     | 3.8E-1  | 1.0E0     |
| <input type="checkbox"/> | GOTERM_MF_FAT         | <a href="#">ATPase activity, coupled to transmembrane movement of ions, phosphorylative mechanism</a> | RT |  |  |  | 9     | 3.9E-1  | 1.0E0     |
| <input type="checkbox"/> | INTERPRO              | <a href="#">ATPase, P-type, ATPase-associated region</a>                                              | RT |  |  |  | 8     | 4.8E-1  | 1.0E0     |
| <input type="checkbox"/> | GOTERM_BP_FAT         | <a href="#">lipid transport</a>                                                                       | RT |  |  |  | 4     | 6.0E-1  | 1.0E0     |
| <input type="checkbox"/> | GOTERM_BP_FAT         | <a href="#">lipid localization</a>                                                                    | RT |  |  |  | 4     | 6.0E-1  | 1.0E0     |
| <input type="checkbox"/> | GOTERM_BP_FAT         | <a href="#">phospholipid transport</a>                                                                | RT |  |  |  | 3     | 7.7E-1  | 1.0E0     |
| <input type="checkbox"/> | INTERPRO              | <a href="#">ATPase, P-type phosphorylation site</a>                                                   | RT |  |  |  | 5     | 7.9E-1  | 1.0E0     |
| <input type="checkbox"/> | GOTERM_MF_FAT         | <a href="#">lipid transporter activity</a>                                                            | RT |  |  |  | 4     | 8.0E-1  | 1.0E0     |
| <input type="checkbox"/> | INTERPRO              | <a href="#">ATPase, P-type, phospholipid-translocating, flippase</a>                                  | RT |  |  |  | 3     | 8.0E-1  | 1.0E0     |
| <input type="checkbox"/> | GOTERM_MF_FAT         | <a href="#">phospholipid-translocating ATPase activity</a>                                            | RT |  |  |  | 3     | 9.0E-1  | 1.0E0     |
| <input type="checkbox"/> | GOTERM_MF_FAT         | <a href="#">phospholipid transporter activity</a>                                                     | RT |  |  |  | 3     | 9.0E-1  | 1.0E0     |
| <input type="checkbox"/> | GOTERM_MF_FAT         | <a href="#">aminophospholipid transporter activity</a>                                                | RT |  |  |  | 3     | 9.0E-1  | 1.0E0     |
|                          | Annotation Cluster 35 | Enrichment Score: 0.18                                                                                |    |  |  |  | Count | P_Value | Benjamini |
| <input type="checkbox"/> | GOTERM_BP_FAT         | <a href="#">proteolysis</a>                                                                           | RT |  |  |  | 54    | 2.1E-1  | 1.0E0     |
| <input type="checkbox"/> | GOTERM_BP_FAT         | <a href="#">cellular macromolecule catabolic process</a>                                              | RT |  |  |  | 20    | 5.6E-1  | 1.0E0     |
| <input type="checkbox"/> | GOTERM_BP_FAT         | <a href="#">ubiquitin-dependent protein catabolic process</a>                                         | RT |  |  |  | 9     | 5.6E-1  | 1.0E0     |
| <input type="checkbox"/> | GOTERM_BP_FAT         | <a href="#">proteolysis involved in cellular protein catabolic process</a>                            | RT |  |  |  | 19    | 6.2E-1  | 1.0E0     |
| <input type="checkbox"/> | GOTERM_BP_FAT         | <a href="#">cellular protein catabolic process</a>                                                    | RT |  |  |  | 19    | 6.2E-1  | 1.0E0     |
| <input type="checkbox"/> | INTERPRO              | <a href="#">Proteasome, subunit alpha/beta</a>                                                        | RT |  |  |  | 9     | 6.3E-1  | 1.0E0     |
| <input type="checkbox"/> | GOTERM_MF_FAT         | <a href="#">threonine-type peptidase activity</a>                                                     | RT |  |  |  | 9     | 6.4E-1  | 1.0E0     |
| <input type="checkbox"/> | GOTERM_MF_FAT         | <a href="#">threonine-type endopeptidase activity</a>                                                 | RT |  |  |  | 9     | 6.4E-1  | 1.0E0     |
| <input type="checkbox"/> | GOTERM_CC_FAT         | <a href="#">proteasome core complex</a>                                                               | RT |  |  |  | 9     | 6.4E-1  | 1.0E0     |
| <input type="checkbox"/> | GOTERM_BP_FAT         | <a href="#">modification-dependent protein catabolic process</a>                                      | RT |  |  |  | 15    | 6.5E-1  | 1.0E0     |
| <input type="checkbox"/> | GOTERM_BP_FAT         | <a href="#">modification-dependent macromolecule catabolic process</a>                                | RT |  |  |  | 15    | 6.5E-1  | 1.0E0     |
| <input type="checkbox"/> | GOTERM_BP_FAT         | <a href="#">macromolecule catabolic process</a>                                                       | RT |  |  |  | 22    | 6.5E-1  | 1.0E0     |
| <input type="checkbox"/> | INTERPRO              | <a href="#">Proteasome, alpha-subunit, conserved site</a>                                             | RT |  |  |  | 5     | 6.7E-1  | 1.0E0     |
| <input type="checkbox"/> | GOTERM_BP_FAT         | <a href="#">protein catabolic process</a>                                                             | RT |  |  |  | 21    | 7.1E-1  | 1.0E0     |
| <input type="checkbox"/> | INTERPRO              | <a href="#">Proteasome, alpha and beta subunits</a>                                                   | RT |  |  |  | 8     | 7.2E-1  | 1.0E0     |
| <input type="checkbox"/> | GOTERM_CC_FAT         | <a href="#">proteasome complex</a>                                                                    | RT |  |  |  | 12    | 7.8E-1  | 1.0E0     |
| <input type="checkbox"/> | SP_PIR_KEYWORDS       | <a href="#">threonine protease</a>                                                                    | RT |  |  |  | 4     | 7.9E-1  | 1.0E0     |
| <input type="checkbox"/> | GOTERM_CC_FAT         | <a href="#">cytosol</a>                                                                               | RT |  |  |  | 16    | 8.2E-1  | 1.0E0     |
| <input type="checkbox"/> | SP_PIR_KEYWORDS       | <a href="#">proteasome</a>                                                                            | RT |  |  |  | 11    | 8.3E-1  | 9.9E-1    |
| <input type="checkbox"/> | KEGG_PATHWAY          | <a href="#">Proteasome</a>                                                                            | RT |  |  |  | 15    | 8.6E-1  | 1.0E0     |
| <input type="checkbox"/> | SP_PIR_KEYWORDS       | <a href="#">ubl conjugation pathway</a>                                                               | RT |  |  |  | 7     | 8.8E-1  | 1.0E0     |
| <input type="checkbox"/> | PIR_SUPERFAMILY       | PIRSF001212: multicatalytic endopeptidase complex chain C9                                            | RT |  |  |  | 3     | 9.4E-1  | 1.0E0     |
|                          | Annotation Cluster 36 | Enrichment Score: 0.17                                                                                |    |  |  |  | Count | P_Value | Benjamini |
| <input type="checkbox"/> | INTERPRO              | <a href="#">Tetratricopeptide-like helical</a>                                                        | RT |  |  |  | 20    | 4.3E-1  | 1.0E0     |
| <input type="checkbox"/> | INTERPRO              | <a href="#">Tetratricopeptide region</a>                                                              | RT |  |  |  | 15    | 5.7E-1  | 1.0E0     |
| <input type="checkbox"/> | INTERPRO              | <a href="#">Tetratricopeptide repeat</a>                                                              | RT |  |  |  | 14    | 7.2E-1  | 1.0E0     |
| <input type="checkbox"/> | SMART                 | <a href="#">TPR</a>                                                                                   | RT |  |  |  | 14    | 7.4E-1  | 1.0E0     |
| <input type="checkbox"/> | INTERPRO              | <a href="#">Tetratricopeptide TPR-1</a>                                                               | RT |  |  |  | 11    | 8.3E-1  | 1.0E0     |
| <input type="checkbox"/> | SP_PIR_KEYWORDS       | <a href="#">tpr repeat</a>                                                                            | RT |  |  |  | 5     | 8.8E-1  | 9.9E-1    |
|                          | Annotation Cluster 37 | Enrichment Score: 0.16                                                                                |    |  |  |  | Count | P_Value | Benjamini |
| <input type="checkbox"/> | GOTERM_MF_FAT         | <a href="#">metallopeptidase activity</a>                                                             | RT |  |  |  | 10    | 3.0E-1  | 1.0E0     |
| <input type="checkbox"/> | GOTERM_MF_FAT         | <a href="#">metalloexopeptidase activity</a>                                                          | RT |  |  |  | 5     | 6.7E-1  | 1.0E0     |
| <input type="checkbox"/> | GOTERM_MF_FAT         | <a href="#">exopeptidase activity</a>                                                                 | RT |  |  |  | 7     | 7.1E-1  | 1.0E0     |

| <input type="checkbox"/> | Annotation            | Term                                                              | RT | Count | P_Value | Benjamini         |
|--------------------------|-----------------------|-------------------------------------------------------------------|----|-------|---------|-------------------|
| <input type="checkbox"/> | GOTERM_MF_FAT         | <a href="#">metallocarboxypeptidase activity</a>                  | RT | 3     | 8.0E-1  | 1.0E0             |
| <input type="checkbox"/> | GOTERM_MF_FAT         | <a href="#">carboxypeptidase activity</a>                         | RT | 3     | 8.0E-1  | 1.0E0             |
| <input type="checkbox"/> | INTERPRO              | <a href="#">Peptidase M14_carboxypeptidase A</a>                  | RT | 3     | 9.0E-1  | 1.0E0             |
| <input type="checkbox"/> | SMART                 | <a href="#">Zn_pept</a>                                           | RT | 3     | 9.0E-1  | 1.0E0             |
|                          | Annotation Cluster 38 | Enrichment Score: 0.16                                            |    |       | Count   | P_Value Benjamini |
| <input type="checkbox"/> | GOTERM_MF_FAT         | <a href="#">translation factor activity, nucleic acid binding</a> | RT | 19    | 6.6E-1  | 1.0E0             |
| <input type="checkbox"/> | GOTERM_MF_FAT         | <a href="#">translation initiation factor activity</a>            | RT | 15    | 6.7E-1  | 1.0E0             |
| <input type="checkbox"/> | SP_PIR_KEYWORDS       | <a href="#">Initiation factor</a>                                 | RT | 11    | 7.6E-1  | 1.0E0             |
|                          | Annotation Cluster 39 | Enrichment Score: 0.16                                            |    |       | Count   | P_Value Benjamini |
| <input type="checkbox"/> | GOTERM_BP_FAT         | <a href="#">alcohol biosynthetic process</a>                      | RT | 4     | 6.0E-1  | 1.0E0             |
| <input type="checkbox"/> | GOTERM_BP_FAT         | <a href="#">cellular carbohydrate biosynthetic process</a>        | RT | 5     | 6.2E-1  | 1.0E0             |
| <input type="checkbox"/> | GOTERM_BP_FAT         | <a href="#">carbohydrate biosynthetic process</a>                 | RT | 5     | 6.2E-1  | 1.0E0             |
| <input type="checkbox"/> | GOTERM_BP_FAT         | <a href="#">monosaccharide biosynthetic process</a>               | RT | 3     | 7.7E-1  | 1.0E0             |
| <input type="checkbox"/> | GOTERM_BP_FAT         | <a href="#">pyruvate metabolic process</a>                        | RT | 3     | 7.7E-1  | 1.0E0             |
| <input type="checkbox"/> | GOTERM_BP_FAT         | <a href="#">hexose biosynthetic process</a>                       | RT | 3     | 7.7E-1  | 1.0E0             |
| <input type="checkbox"/> | GOTERM_BP_FAT         | <a href="#">gluconeogenesis</a>                                   | RT | 3     | 7.7E-1  | 1.0E0             |
|                          | Annotation Cluster 40 | Enrichment Score: 0.14                                            |    |       | Count   | P_Value Benjamini |
| <input type="checkbox"/> | GOTERM_BP_FAT         | <a href="#">phosphorus metabolic process</a>                      | RT | 168   | 5.8E-1  | 1.0E0             |
| <input type="checkbox"/> | GOTERM_BP_FAT         | <a href="#">phosphate metabolic process</a>                       | RT | 168   | 5.8E-1  | 1.0E0             |
| <input type="checkbox"/> | GOTERM_BP_FAT         | <a href="#">phosphorylation</a>                                   | RT | 159   | 5.8E-1  | 1.0E0             |
| <input type="checkbox"/> | GOTERM_MF_FAT         | <a href="#">nucleotide binding</a>                                | RT | 356   | 5.9E-1  | 1.0E0             |
| <input type="checkbox"/> | GOTERM_BP_FAT         | <a href="#">protein amino acid phosphorylation</a>                | RT | 148   | 6.1E-1  | 1.0E0             |
| <input type="checkbox"/> | GOTERM_MF_FAT         | <a href="#">purine nucleotide binding</a>                         | RT | 334   | 6.4E-1  | 1.0E0             |
| <input type="checkbox"/> | GOTERM_MF_FAT         | <a href="#">purine ribonucleotide binding</a>                     | RT | 328   | 7.1E-1  | 1.0E0             |
| <input type="checkbox"/> | GOTERM_MF_FAT         | <a href="#">ribonucleotide binding</a>                            | RT | 328   | 7.1E-1  | 1.0E0             |
| <input type="checkbox"/> | GOTERM_MF_FAT         | <a href="#">nucleoside binding</a>                                | RT | 306   | 7.3E-1  | 1.0E0             |
| <input type="checkbox"/> | GOTERM_MF_FAT         | <a href="#">adenyl nucleotide binding</a>                         | RT | 303   | 7.6E-1  | 1.0E0             |
| <input type="checkbox"/> | GOTERM_MF_FAT         | <a href="#">purine nucleoside binding</a>                         | RT | 303   | 7.6E-1  | 1.0E0             |
| <input type="checkbox"/> | GOTERM_MF_FAT         | <a href="#">ATP binding</a>                                       | RT | 297   | 8.2E-1  | 1.0E0             |
| <input type="checkbox"/> | GOTERM_MF_FAT         | <a href="#">adenyl ribonucleotide binding</a>                     | RT | 297   | 8.2E-1  | 1.0E0             |
| <input type="checkbox"/> | SP_PIR_KEYWORDS       | <a href="#">atp-binding</a>                                       | RT | 143   | 8.4E-1  | 9.9E-1            |
| <input type="checkbox"/> | SP_PIR_KEYWORDS       | <a href="#">nucleotide-binding</a>                                | RT | 150   | 8.5E-1  | 9.9E-1            |
| <input type="checkbox"/> | INTERPRO              | <a href="#">Protein kinase_core</a>                               | RT | 147   | 8.5E-1  | 1.0E0             |
| <input type="checkbox"/> | GOTERM_MF_FAT         | <a href="#">protein kinase activity</a>                           | RT | 150   | 8.6E-1  | 1.0E0             |
| <input type="checkbox"/> | SP_PIR_KEYWORDS       | <a href="#">kinase</a>                                            | RT | 183   | 8.7E-1  | 1.0E0             |
| <input type="checkbox"/> | INTERPRO              | <a href="#">Serine/threonine protein kinase-related</a>           | RT | 126   | 9.2E-1  | 1.0E0             |
|                          | Annotation Cluster 41 | Enrichment Score: 0.13                                            |    |       | Count   | P_Value Benjamini |
| <input type="checkbox"/> | GOTERM_BP_FAT         | <a href="#">carboxylic acid biosynthetic process</a>              | RT | 5     | 6.2E-1  | 1.0E0             |
| <input type="checkbox"/> | GOTERM_BP_FAT         | <a href="#">organic acid biosynthetic process</a>                 | RT | 5     | 6.2E-1  | 1.0E0             |
| <input type="checkbox"/> | GOTERM_BP_FAT         | <a href="#">cellular amino acid biosynthetic process</a>          | RT | 3     | 8.8E-1  | 1.0E0             |
| <input type="checkbox"/> | GOTERM_BP_FAT         | <a href="#">amine biosynthetic process</a>                        | RT | 3     | 9.4E-1  | 1.0E0             |
|                          | Annotation Cluster 42 | Enrichment Score: 0.11                                            |    |       | Count   | P_Value Benjamini |
| <input type="checkbox"/> | GOTERM_CC_FAT         | <a href="#">organelle membrane</a>                                | RT | 8     | 4.8E-1  | 1.0E0             |
| <input type="checkbox"/> | GOTERM_CC_FAT         | <a href="#">membrane coat</a>                                     | RT | 9     | 6.4E-1  | 1.0E0             |
| <input type="checkbox"/> | GOTERM_CC_FAT         | <a href="#">coated membrane</a>                                   | RT | 9     | 6.4E-1  | 1.0E0             |
| <input type="checkbox"/> | INTERPRO              | <a href="#">Clathrin/coatomer adaptor_adaptin-like_N-terminal</a> | RT | 4     | 6.5E-1  | 1.0E0             |
| <input type="checkbox"/> | GOTERM_CC_FAT         | <a href="#">Golgi apparatus</a>                                   | RT | 7     | 7.1E-1  | 1.0E0             |
| <input type="checkbox"/> | GOTERM_CC_FAT         | <a href="#">cytoplasmic vesicle</a>                               | RT | 4     | 8.0E-1  | 1.0E0             |
| <input type="checkbox"/> | GOTERM_CC_FAT         | <a href="#">coated vesicle membrane</a>                           | RT | 4     | 8.0E-1  | 1.0E0             |
| <input type="checkbox"/> | GOTERM_CC_FAT         | <a href="#">cytoplasmic vesicle membrane</a>                      | RT | 4     | 8.0E-1  | 1.0E0             |
| <input type="checkbox"/> | GOTERM_CC_FAT         | <a href="#">coated vesicle</a>                                    | RT | 4     | 8.0E-1  | 1.0E0             |
| <input type="checkbox"/> | GOTERM_CC_FAT         | <a href="#">vesicle coat</a>                                      | RT | 4     | 8.0E-1  | 1.0E0             |
| <input type="checkbox"/> | GOTERM_CC_FAT         | <a href="#">cytoplasmic membrane-bounded vesicle</a>              | RT | 4     | 8.0E-1  | 1.0E0             |
| <input type="checkbox"/> | GOTERM_CC_FAT         | <a href="#">cytoplasmic vesicle part</a>                          | RT | 4     | 8.0E-1  | 1.0E0             |
| <input type="checkbox"/> | GOTERM_CC_FAT         | <a href="#">vesicle membrane</a>                                  | RT | 4     | 8.0E-1  | 1.0E0             |
| <input type="checkbox"/> | GOTERM_CC_FAT         | <a href="#">vesicle</a>                                           | RT | 4     | 8.0E-1  | 1.0E0             |
| <input type="checkbox"/> | GOTERM_CC_FAT         | <a href="#">membrane-bounded vesicle</a>                          | RT | 4     | 8.0E-1  | 1.0E0             |
| <input type="checkbox"/> | GOTERM_CC_FAT         | <a href="#">Golgi apparatus part</a>                              | RT | 5     | 8.0E-1  | 1.0E0             |

|                          |                       |                                                                              |    |  |  |  |       |         |           |
|--------------------------|-----------------------|------------------------------------------------------------------------------|----|--|--|--|-------|---------|-----------|
| <input type="checkbox"/> | GOTERM_CC_FAT         |                                                                              |    |  |  |  |       |         |           |
| <input type="checkbox"/> | GOTERM_CC_FAT         | <a href="#">transport vesicle membrane</a>                                   | RT |  |  |  | 3     | 9.0E-1  | 1.0E0     |
| <input type="checkbox"/> | GOTERM_CC_FAT         | <a href="#">transport vesicle</a>                                            | RT |  |  |  | 3     | 9.0E-1  | 1.0E0     |
| <input type="checkbox"/> | GOTERM_CC_FAT         | <a href="#">endomembrane system</a>                                          | RT |  |  |  | 8     | 9.3E-1  | 1.0E0     |
| <input type="checkbox"/> | GOTERM_BP_FAT         | <a href="#">ER to Golgi vesicle-mediated transport</a>                       | RT |  |  |  | 3     | 9.4E-1  | 1.0E0     |
| <input type="checkbox"/> | GOTERM_BP_FAT         | <a href="#">Golgi vesicle transport</a>                                      | RT |  |  |  | 3     | 9.4E-1  | 1.0E0     |
|                          | Annotation Cluster 43 | Enrichment Score: 0.11                                                       |    |  |  |  | Count | P_Value | Benjamini |
| <input type="checkbox"/> | INTERPRO              | <a href="#">Zinc finger, C3HC4 RING-type</a>                                 | RT |  |  |  | 22    | 4.7E-1  | 1.0E0     |
| <input type="checkbox"/> | INTERPRO              | <a href="#">Zinc finger, RING-type</a>                                       | RT |  |  |  | 39    | 6.3E-1  | 1.0E0     |
| <input type="checkbox"/> | SMART                 | <a href="#">RING</a>                                                         | RT |  |  |  | 39    | 6.7E-1  | 1.0E0     |
| <input type="checkbox"/> | SP_PIR_KEYWORDS       | <a href="#">zinc-finger</a>                                                  | RT |  |  |  | 34    | 7.8E-1  | 1.0E0     |
| <input type="checkbox"/> | SP_PIR_KEYWORDS       | <a href="#">metal-binding</a>                                                | RT |  |  |  | 55    | 8.3E-1  | 1.0E0     |
| <input type="checkbox"/> | SP_PIR_KEYWORDS       | <a href="#">zinc</a>                                                         | RT |  |  |  | 46    | 8.3E-1  | 9.9E-1    |
| <input type="checkbox"/> | GOTERM_MF_FAT         | <a href="#">metal ion binding</a>                                            | RT |  |  |  | 142   | 8.5E-1  | 1.0E0     |
| <input type="checkbox"/> | GOTERM_MF_FAT         | <a href="#">cation binding</a>                                               | RT |  |  |  | 143   | 8.7E-1  | 1.0E0     |
| <input type="checkbox"/> | GOTERM_MF_FAT         | <a href="#">ion binding</a>                                                  | RT |  |  |  | 143   | 8.7E-1  | 1.0E0     |
| <input type="checkbox"/> | GOTERM_MF_FAT         | <a href="#">zinc ion binding</a>                                             | RT |  |  |  | 80    | 9.5E-1  | 1.0E0     |
| <input type="checkbox"/> | GOTERM_MF_FAT         | <a href="#">transition metal ion binding</a>                                 | RT |  |  |  | 97    | 9.8E-1  | 1.0E0     |
|                          | Annotation Cluster 44 | Enrichment Score: 0.11                                                       |    |  |  |  | Count | P_Value | Benjamini |
| <input type="checkbox"/> | INTERPRO              | <a href="#">Like-Sm ribonucleoprotein, eukaryotic and archaea-type, core</a> | RT |  |  |  | 5     | 6.7E-1  | 1.0E0     |
| <input type="checkbox"/> | SMART                 | <a href="#">Sm</a>                                                           | RT |  |  |  | 5     | 6.8E-1  | 1.0E0     |
| <input type="checkbox"/> | INTERPRO              | <a href="#">Like-Sm ribonucleoprotein, core</a>                              | RT |  |  |  | 6     | 8.7E-1  | 1.0E0     |
| <input type="checkbox"/> | SP_PIR_KEYWORDS       | <a href="#">viral nucleoprotein</a>                                          | RT |  |  |  | 7     | 9.5E-1  | 1.0E0     |
|                          | Annotation Cluster 45 | Enrichment Score: 0.1                                                        |    |  |  |  | Count | P_Value | Benjamini |
| <input type="checkbox"/> | GOTERM_MF_FAT         | <a href="#">phosphatase activity</a>                                         | RT |  |  |  | 25    | 7.4E-1  | 1.0E0     |
| <input type="checkbox"/> | GOTERM_BP_FAT         | <a href="#">dephosphorylation</a>                                            | RT |  |  |  | 9     | 7.6E-1  | 1.0E0     |
| <input type="checkbox"/> | GOTERM_MF_FAT         | <a href="#">phosphoprotein phosphatase activity</a>                          | RT |  |  |  | 15    | 8.6E-1  | 1.0E0     |
|                          | Annotation Cluster 46 | Enrichment Score: 0.1                                                        |    |  |  |  | Count | P_Value | Benjamini |
| <input type="checkbox"/> | KEGG_PATHWAY          | <a href="#">Ubiquitin mediated proteolysis</a>                               | RT |  |  |  | 9     | 2.4E-1  | 1.0E0     |
| <input type="checkbox"/> | INTERPRO              | <a href="#">Ubiquitin-conjugating enzyme/RWD-like</a>                        | RT |  |  |  | 7     | 8.0E-1  | 1.0E0     |
| <input type="checkbox"/> | INTERPRO              | <a href="#">Ubiquitin-conjugating enzyme, E2</a>                             | RT |  |  |  | 7     | 8.0E-1  | 1.0E0     |
| <input type="checkbox"/> | SMART                 | <a href="#">UBCc</a>                                                         | RT |  |  |  | 7     | 8.1E-1  | 1.0E0     |
| <input type="checkbox"/> | SP_PIR_KEYWORDS       | <a href="#">ubl conjugation pathway</a>                                      | RT |  |  |  | 7     | 8.8E-1  | 1.0E0     |
| <input type="checkbox"/> | GOTERM_MF_FAT         | <a href="#">small conjugating protein ligase activity</a>                    | RT |  |  |  | 7     | 8.8E-1  | 1.0E0     |
| <input type="checkbox"/> | GOTERM_MF_FAT         | <a href="#">ubiquitin-protein ligase activity</a>                            | RT |  |  |  | 3     | 9.0E-1  | 1.0E0     |
| <input type="checkbox"/> | PIR_SUPERFAMILY       | PIRSF001567: ubiquitin-protein ligase E2                                     | RT |  |  |  | 3     | 9.4E-1  | 1.0E0     |
| <input type="checkbox"/> | GOTERM_MF_FAT         | <a href="#">ligase activity, forming carbon-nitrogen bonds</a>               | RT |  |  |  | 15    | 9.7E-1  | 1.0E0     |
| <input type="checkbox"/> | GOTERM_MF_FAT         | <a href="#">acid-amino acid ligase activity</a>                              | RT |  |  |  | 12    | 9.8E-1  | 1.0E0     |
| <input type="checkbox"/> | SP_PIR_KEYWORDS       | <a href="#">ligase</a>                                                       | RT |  |  |  | 26    | 9.8E-1  | 1.0E0     |
|                          | Annotation Cluster 47 | Enrichment Score: 0.1                                                        |    |  |  |  | Count | P_Value | Benjamini |
| <input type="checkbox"/> | GOTERM_BP_FAT         | <a href="#">M phase</a>                                                      | RT |  |  |  | 4     | 7.6E-1  | 1.0E0     |
| <input type="checkbox"/> | GOTERM_BP_FAT         | <a href="#">cell cycle process</a>                                           | RT |  |  |  | 4     | 7.6E-1  | 1.0E0     |
| <input type="checkbox"/> | GOTERM_BP_FAT         | <a href="#">cell cycle phase</a>                                             | RT |  |  |  | 4     | 7.6E-1  | 1.0E0     |
| <input type="checkbox"/> | GOTERM_BP_FAT         | <a href="#">cell cycle</a>                                                   | RT |  |  |  | 4     | 9.2E-1  | 1.0E0     |
|                          | Annotation Cluster 48 | Enrichment Score: 0.1                                                        |    |  |  |  | Count | P_Value | Benjamini |
| <input type="checkbox"/> | COG_ONTOLOGY          | <a href="#">Defense mechanisms</a>                                           | RT |  |  |  | 14    | 6.2E-1  | 9.9E-1    |
| <input type="checkbox"/> | INTERPRO              | <a href="#">ABC transporter-like</a>                                         | RT |  |  |  | 12    | 8.8E-1  | 1.0E0     |
| <input type="checkbox"/> | INTERPRO              | <a href="#">ABC transporter, conserved site</a>                              | RT |  |  |  | 11    | 9.2E-1  | 1.0E0     |
|                          | Annotation Cluster 49 | Enrichment Score: 0.09                                                       |    |  |  |  | Count | P_Value | Benjamini |
| <input type="checkbox"/> | INTERPRO              | <a href="#">Myb transcription factor</a>                                     | RT |  |  |  | 3     | 8.0E-1  | 1.0E0     |
| <input type="checkbox"/> | INTERPRO              | <a href="#">Myb-type HTH DNA-binding domain</a>                              | RT |  |  |  | 3     | 8.0E-1  | 1.0E0     |
| <input type="checkbox"/> | INTERPRO              | <a href="#">SANT, DNA-binding</a>                                            | RT |  |  |  | 6     | 8.0E-1  | 1.0E0     |
| <input type="checkbox"/> | SMART                 | <a href="#">SANT</a>                                                         | RT |  |  |  | 6     | 8.1E-1  | 1.0E0     |
| <input type="checkbox"/> | INTERPRO              | <a href="#">Myb, DNA-binding</a>                                             | RT |  |  |  | 3     | 9.0E-1  | 1.0E0     |
|                          | Annotation Cluster 50 | Enrichment Score: 0.09                                                       |    |  |  |  | Count | P_Value | Benjamini |
| <input type="checkbox"/> | INTERPRO              | <a href="#">AMP-dependent synthetase and ligase</a>                          | RT |  |  |  | 5     | 6.7E-1  | 1.0E0     |
| <input type="checkbox"/> | COG_ONTOLOGY          | <a href="#">Lipid metabolism</a>                                             | RT |  |  |  | 8     | 7.7E-1  | 9.9E-1    |
| <input type="checkbox"/> | GOTERM_MF_FAT         | <a href="#">long-chain-fatty-acid-CoA ligase activity</a>                    | RT |  |  |  | 3     | 9.0E-1  | 1.0E0     |

| <input type="checkbox"/> | Source                | Term                                                                                    | RT | Count | P_Value | Benjamini |
|--------------------------|-----------------------|-----------------------------------------------------------------------------------------|----|-------|---------|-----------|
| <input type="checkbox"/> | GOTERM_MF_FAT         | <a href="#">fatty-acid ligase activity</a>                                              | RT | 3     | 9.0E-1  | 1.0E0     |
| <input type="checkbox"/> | GOTERM_MF_FAT         | <a href="#">ligase activity, forming carbon-sulfur bonds</a>                            | RT | 3     | 9.0E-1  | 1.0E0     |
|                          | Annotation Cluster 51 | Enrichment Score: 0.08                                                                  |    | Count | P_Value | Benjamini |
| <input type="checkbox"/> | KEGG_PATHWAY          | <a href="#">DNA replication</a>                                                         | RT | 12    | 7.7E-1  | 1.0E0     |
| <input type="checkbox"/> | KEGG_PATHWAY          | <a href="#">Mismatch repair</a>                                                         | RT | 8     | 8.1E-1  | 9.9E-1    |
| <input type="checkbox"/> | KEGG_PATHWAY          | <a href="#">Nucleotide excision repair</a>                                              | RT | 8     | 9.2E-1  | 1.0E0     |
|                          | Annotation Cluster 52 | Enrichment Score: 0.08                                                                  |    | Count | P_Value | Benjamini |
| <input type="checkbox"/> | GOTERM_BP_FAT         | <a href="#">ubiquitin-dependent protein catabolic process</a>                           | RT | 9     | 5.6E-1  | 1.0E0     |
| <input type="checkbox"/> | INTERPRO              | <a href="#">Peptidase C19, ubiquitin carboxyl-terminal hydrolase 2, conserved site</a>  | RT | 3     | 8.0E-1  | 1.0E0     |
| <input type="checkbox"/> | INTERPRO              | <a href="#">Peptidase C19, ubiquitin carboxyl-terminal hydrolase 2</a>                  | RT | 3     | 9.5E-1  | 1.0E0     |
| <input type="checkbox"/> | GOTERM_MF_FAT         | <a href="#">ubiquitin thiolesterase activity</a>                                        | RT | 3     | 9.5E-1  | 1.0E0     |
| <input type="checkbox"/> | GOTERM_MF_FAT         | <a href="#">thiolester hydrolase activity</a>                                           | RT | 3     | 9.9E-1  | 1.0E0     |
|                          | Annotation Cluster 53 | Enrichment Score: 0.07                                                                  |    | Count | P_Value | Benjamini |
| <input type="checkbox"/> | SP_PIR_KEYWORDS       | <a href="#">nucleotidyltransferase</a>                                                  | RT | 15    | 6.6E-1  | 1.0E0     |
| <input type="checkbox"/> | KEGG_PATHWAY          | <a href="#">Pyrimidine metabolism</a>                                                   | RT | 19    | 7.2E-1  | 1.0E0     |
| <input type="checkbox"/> | KEGG_PATHWAY          | <a href="#">Purine metabolism</a>                                                       | RT | 18    | 7.7E-1  | 1.0E0     |
| <input type="checkbox"/> | SP_PIR_KEYWORDS       | <a href="#">Transcription</a>                                                           | RT | 5     | 8.0E-1  | 1.0E0     |
| <input type="checkbox"/> | GOTERM_MF_FAT         | <a href="#">ribonucleoside binding</a>                                                  | RT | 3     | 8.0E-1  | 1.0E0     |
| <input type="checkbox"/> | SP_PIR_KEYWORDS       | <a href="#">dna-directed rna polymerase</a>                                             | RT | 7     | 9.2E-1  | 1.0E0     |
| <input type="checkbox"/> | GOTERM_BP_FAT         | <a href="#">transcription</a>                                                           | RT | 12    | 9.4E-1  | 1.0E0     |
| <input type="checkbox"/> | KEGG_PATHWAY          | <a href="#">RNA polymerase</a>                                                          | RT | 8     | 9.7E-1  | 1.0E0     |
| <input type="checkbox"/> | GOTERM_MF_FAT         | <a href="#">DNA-directed RNA polymerase activity</a>                                    | RT | 10    | 9.8E-1  | 1.0E0     |
| <input type="checkbox"/> | GOTERM_MF_FAT         | <a href="#">RNA polymerase activity</a>                                                 | RT | 10    | 9.9E-1  | 1.0E0     |
|                          | Annotation Cluster 54 | Enrichment Score: 0.07                                                                  |    | Count | P_Value | Benjamini |
| <input type="checkbox"/> | INTERPRO              | <a href="#">Ubiquitin supergroup</a>                                                    | RT | 7     | 8.0E-1  | 1.0E0     |
| <input type="checkbox"/> | INTERPRO              | <a href="#">Ubiquitin</a>                                                               | RT | 4     | 8.8E-1  | 1.0E0     |
| <input type="checkbox"/> | SMART                 | <a href="#">UBQ</a>                                                                     | RT | 4     | 8.9E-1  | 1.0E0     |
|                          | Annotation Cluster 55 | Enrichment Score: 0.06                                                                  |    | Count | P_Value | Benjamini |
| <input type="checkbox"/> | INTERPRO              | <a href="#">N-6 adenine-specific DNA methylase, conserved site</a>                      | RT | 4     | 7.9E-1  | 1.0E0     |
| <input type="checkbox"/> | GOTERM_BP_FAT         | <a href="#">one-carbon metabolic process</a>                                            | RT | 6     | 8.4E-1  | 1.0E0     |
| <input type="checkbox"/> | GOTERM_BP_FAT         | <a href="#">methylation</a>                                                             | RT | 5     | 9.1E-1  | 1.0E0     |
| <input type="checkbox"/> | GOTERM_BP_FAT         | <a href="#">biopolymer methylation</a>                                                  | RT | 3     | 9.4E-1  | 1.0E0     |
|                          | Annotation Cluster 56 | Enrichment Score: 0.06                                                                  |    | Count | P_Value | Benjamini |
| <input type="checkbox"/> | GOTERM_MF_FAT         | <a href="#">protein serine/threonine kinase activity</a>                                | RT | 59    | 7.3E-1  | 1.0E0     |
| <input type="checkbox"/> | SP_PIR_KEYWORDS       | <a href="#">serine/threonine-protein kinase</a>                                         | RT | 34    | 7.8E-1  | 1.0E0     |
| <input type="checkbox"/> | INTERPRO              | <a href="#">Protein kinase, ATP binding site</a>                                        | RT | 43    | 9.1E-1  | 1.0E0     |
| <input type="checkbox"/> | INTERPRO              | <a href="#">Serine/threonine protein kinase-related</a>                                 | RT | 126   | 9.2E-1  | 1.0E0     |
| <input type="checkbox"/> | INTERPRO              | <a href="#">Serine/threonine protein kinase, active site</a>                            | RT | 46    | 9.4E-1  | 1.0E0     |
| <input type="checkbox"/> | INTERPRO              | <a href="#">Serine/threonine protein kinase</a>                                         | RT | 29    | 9.5E-1  | 1.0E0     |
| <input type="checkbox"/> | SMART                 | <a href="#">S_TKc</a>                                                                   | RT | 29    | 9.6E-1  | 1.0E0     |
|                          | Annotation Cluster 57 | Enrichment Score: 0.05                                                                  |    | Count | P_Value | Benjamini |
| <input type="checkbox"/> | GOTERM_MF_FAT         | <a href="#">antioxidant activity</a>                                                    | RT | 5     | 6.7E-1  | 1.0E0     |
| <input type="checkbox"/> | INTERPRO              | <a href="#">Alkyl hydroperoxide reductase/ Thiol specific antioxidant/ Mal allergen</a> | RT | 4     | 7.9E-1  | 1.0E0     |
| <input type="checkbox"/> | GOTERM_BP_FAT         | <a href="#">cell redox homeostasis</a>                                                  | RT | 9     | 8.8E-1  | 1.0E0     |
| <input type="checkbox"/> | INTERPRO              | <a href="#">Thioredoxin fold</a>                                                        | RT | 11    | 9.2E-1  | 1.0E0     |
| <input type="checkbox"/> | GOTERM_BP_FAT         | <a href="#">cellular homeostasis</a>                                                    | RT | 9     | 9.2E-1  | 1.0E0     |
| <input type="checkbox"/> | INTERPRO              | <a href="#">Thioredoxin, conserved site</a>                                             | RT | 3     | 9.5E-1  | 1.0E0     |
| <input type="checkbox"/> | GOTERM_BP_FAT         | <a href="#">homeostatic process</a>                                                     | RT | 9     | 9.5E-1  | 1.0E0     |
| <input type="checkbox"/> | INTERPRO              | <a href="#">Thioredoxin-like</a>                                                        | RT | 6     | 9.6E-1  | 1.0E0     |
| <input type="checkbox"/> | INTERPRO              | <a href="#">Thioredoxin, core</a>                                                       | RT | 3     | 9.8E-1  | 1.0E0     |
|                          | Annotation Cluster 58 | Enrichment Score: 0.05                                                                  |    | Count | P_Value | Benjamini |
| <input type="checkbox"/> | KEGG_PATHWAY          | <a href="#">Ribosome</a>                                                                | RT | 37    | 8.5E-1  | 1.0E0     |
| <input type="checkbox"/> | GOTERM_CC_FAT         | <a href="#">ribosome</a>                                                                | RT | 41    | 8.6E-1  | 1.0E0     |
| <input type="checkbox"/> | GOTERM_MF_FAT         | <a href="#">structural constituent of ribosome</a>                                      | RT | 37    | 8.8E-1  | 1.0E0     |
| <input type="checkbox"/> | GOTERM_BP_FAT         | <a href="#">translation</a>                                                             | RT | 58    | 8.8E-1  | 1.0E0     |
| <input type="checkbox"/> | GOTERM_CC_FAT         | <a href="#">intracellular non-membrane-bounded organelle</a>                            | RT | 88    | 8.8E-1  | 1.0E0     |
| <input type="checkbox"/> | GOTERM_CC_FAT         | <a href="#">non-membrane-bounded organelle</a>                                          | RT | 88    | 8.8E-1  | 1.0E0     |

| <input type="checkbox"/> | Annotation Cluster    | Enrichment Score       | Term                                                                                                | RT | Count | P_Value | Benjamini |
|--------------------------|-----------------------|------------------------|-----------------------------------------------------------------------------------------------------|----|-------|---------|-----------|
| <input type="checkbox"/> | SP_PIR_KEYWORDS       |                        | <a href="#">ribosomal protein</a>                                                                   | RT | 38    | 9.0E-1  | 1.0EO     |
| <input type="checkbox"/> | GOTERM_MF_FAT         |                        | <a href="#">structural molecule activity</a>                                                        | RT | 44    | 9.1E-1  | 1.0EO     |
| <input type="checkbox"/> | GOTERM_CC_FAT         |                        | <a href="#">ribonucleoprotein complex</a>                                                           | RT | 50    | 9.9E-1  | 1.0EO     |
|                          | Annotation Cluster 59 | Enrichment Score: 0.05 |                                                                                                     |    | Count | P_Value | Benjamini |
| <input type="checkbox"/> | GOTERM_MF_FAT         |                        | <a href="#">acetyltransferase activity</a>                                                          | RT | 6     | 8.0E-1  | 1.0EO     |
| <input type="checkbox"/> | INTERPRO              |                        | <a href="#">GCN5-related N-acetyltransferase</a>                                                    | RT | 5     | 8.8E-1  | 1.0EO     |
| <input type="checkbox"/> | GOTERM_MF_FAT         |                        | <a href="#">N-acetyltransferase activity</a>                                                        | RT | 5     | 8.8E-1  | 1.0EO     |
| <input type="checkbox"/> | GOTERM_MF_FAT         |                        | <a href="#">N-acyltransferase activity</a>                                                          | RT | 5     | 9.3E-1  | 1.0EO     |
| <input type="checkbox"/> | INTERPRO              |                        | <a href="#">Acyl-CoA N-acyltransferase</a>                                                          | RT | 4     | 9.8E-1  | 1.0EO     |
|                          | Annotation Cluster 60 | Enrichment Score: 0.05 |                                                                                                     |    | Count | P_Value | Benjamini |
| <input type="checkbox"/> | GOTERM_BP_FAT         |                        | <a href="#">drug transport</a>                                                                      | RT | 3     | 8.8E-1  | 1.0EO     |
| <input type="checkbox"/> | GOTERM_BP_FAT         |                        | <a href="#">multidrug transport</a>                                                                 | RT | 3     | 8.8E-1  | 1.0EO     |
| <input type="checkbox"/> | GOTERM_BP_FAT         |                        | <a href="#">response to drug</a>                                                                    | RT | 3     | 8.8E-1  | 1.0EO     |
| <input type="checkbox"/> | INTERPRO              |                        | <a href="#">Multi antimicrobial extrusion protein MatE</a>                                          | RT | 3     | 9.0E-1  | 1.0EO     |
| <input type="checkbox"/> | GOTERM_MF_FAT         |                        | <a href="#">drug transporter activity</a>                                                           | RT | 3     | 9.0E-1  | 1.0EO     |
| <input type="checkbox"/> | GOTERM_MF_FAT         |                        | <a href="#">antiporter activity</a>                                                                 | RT | 3     | 9.5E-1  | 1.0EO     |
|                          | Annotation Cluster 61 | Enrichment Score: 0.04 |                                                                                                     |    | Count | P_Value | Benjamini |
| <input type="checkbox"/> | PIR_SUPERFAMILY       |                        | PIRSF000908: serine/threonine-protein phosphatase, conventional type                                | RT | 5     | 7.7E-1  | 1.0EO     |
| <input type="checkbox"/> | GOTERM_MF_FAT         |                        | <a href="#">phosphoprotein phosphatase activity</a>                                                 | RT | 15    | 8.6E-1  | 1.0EO     |
| <input type="checkbox"/> | INTERPRO              |                        | <a href="#">Metallophosphoesterase</a>                                                              | RT | 11    | 8.8E-1  | 1.0EO     |
| <input type="checkbox"/> | SP_PIR_KEYWORDS       |                        | <a href="#">iron</a>                                                                                | RT | 10    | 9.2E-1  | 1.0EO     |
| <input type="checkbox"/> | INTERPRO              |                        | <a href="#">Serine/threonine-specific protein phosphatase and bis(5-nucleosyl)-tetraphosphatase</a> | RT | 7     | 9.5E-1  | 1.0EO     |
| <input type="checkbox"/> | SMART                 |                        | <a href="#">PP2Ac</a>                                                                               | RT | 7     | 9.6E-1  | 1.0EO     |
| <input type="checkbox"/> | GOTERM_MF_FAT         |                        | <a href="#">iron ion binding</a>                                                                    | RT | 13    | 9.9E-1  | 1.0EO     |
|                          | Annotation Cluster 62 | Enrichment Score: 0.04 |                                                                                                     |    | Count | P_Value | Benjamini |
| <input type="checkbox"/> | GOTERM_MF_FAT         |                        | <a href="#">GTPase activity</a>                                                                     | RT | 9     | 8.8E-1  | 1.0EO     |
| <input type="checkbox"/> | INTERPRO              |                        | <a href="#">Translation elongation factor EFTu/EF1A, domain 2</a>                                   | RT | 3     | 9.0E-1  | 1.0EO     |
| <input type="checkbox"/> | INTERPRO              |                        | <a href="#">Protein synthesis factor, GTP-binding</a>                                               | RT | 4     | 9.4E-1  | 1.0EO     |
|                          | Annotation Cluster 63 | Enrichment Score: 0.04 |                                                                                                     |    | Count | P_Value | Benjamini |
| <input type="checkbox"/> | GOTERM_BP_FAT         |                        | <a href="#">protein complex biogenesis</a>                                                          | RT | 7     | 8.3E-1  | 1.0EO     |
| <input type="checkbox"/> | GOTERM_BP_FAT         |                        | <a href="#">protein complex assembly</a>                                                            | RT | 7     | 8.3E-1  | 1.0EO     |
| <input type="checkbox"/> | GOTERM_BP_FAT         |                        | <a href="#">cellular protein complex assembly</a>                                                   | RT | 6     | 8.4E-1  | 1.0EO     |
| <input type="checkbox"/> | GOTERM_BP_FAT         |                        | <a href="#">protein polymerization</a>                                                              | RT | 4     | 9.2E-1  | 1.0EO     |
| <input type="checkbox"/> | INTERPRO              |                        | <a href="#">Tubulin</a>                                                                             | RT | 4     | 9.4E-1  | 1.0EO     |
| <input type="checkbox"/> | INTERPRO              |                        | <a href="#">Tubulin, conserved site</a>                                                             | RT | 4     | 9.4E-1  | 1.0EO     |
| <input type="checkbox"/> | INTERPRO              |                        | <a href="#">Tubulin/FtsZ, GTPase domain</a>                                                         | RT | 4     | 9.4E-1  | 1.0EO     |
| <input type="checkbox"/> | PIR_SUPERFAMILY       |                        | PIRSF002306: tubulin                                                                                | RT | 3     | 9.7E-1  | 1.0EO     |
| <input type="checkbox"/> | INTERPRO              |                        | <a href="#">Tubulin/FtsZ, 2-layer sandwich domain</a>                                               | RT | 3     | 9.8E-1  | 1.0EO     |
|                          | Annotation Cluster 64 | Enrichment Score: 0.04 |                                                                                                     |    | Count | P_Value | Benjamini |
| <input type="checkbox"/> | GOTERM_MF_FAT         |                        | <a href="#">electron carrier activity</a>                                                           | RT | 13    | 7.9E-1  | 1.0EO     |
| <input type="checkbox"/> | GOTERM_MF_FAT         |                        | <a href="#">metal cluster binding</a>                                                               | RT | 10    | 9.2E-1  | 1.0EO     |
| <input type="checkbox"/> | GOTERM_MF_FAT         |                        | <a href="#">iron-sulfur cluster binding</a>                                                         | RT | 10    | 9.2E-1  | 1.0EO     |
| <input type="checkbox"/> | INTERPRO              |                        | <a href="#">4Fe-4S ferredoxin, iron-sulphur binding, subgroup</a>                                   | RT | 4     | 9.7E-1  | 1.0EO     |
| <input type="checkbox"/> | INTERPRO              |                        | <a href="#">4Fe-4S ferredoxin, iron-sulphur binding domain</a>                                      | RT | 4     | 9.7E-1  | 1.0EO     |
|                          | Annotation Cluster 65 | Enrichment Score: 0.04 |                                                                                                     |    | Count | P_Value | Benjamini |
| <input type="checkbox"/> | INTERPRO              |                        | <a href="#">Tyrosine protein kinase</a>                                                             | RT | 4     | 8.8E-1  | 1.0EO     |
| <input type="checkbox"/> | SMART                 |                        | <a href="#">TyrKc</a>                                                                               | RT | 4     | 8.9E-1  | 1.0EO     |
| <input type="checkbox"/> | GOTERM_MF_FAT         |                        | <a href="#">protein tyrosine kinase activity</a>                                                    | RT | 11    | 9.9E-1  | 1.0EO     |
|                          | Annotation Cluster 66 | Enrichment Score: 0.04 |                                                                                                     |    | Count | P_Value | Benjamini |
| <input type="checkbox"/> | GOTERM_MF_FAT         |                        | <a href="#">vitamin binding</a>                                                                     | RT | 6     | 8.8E-1  | 1.0EO     |
| <input type="checkbox"/> | GOTERM_MF_FAT         |                        | <a href="#">vitamin B6 binding</a>                                                                  | RT | 5     | 9.3E-1  | 1.0EO     |
| <input type="checkbox"/> | GOTERM_MF_FAT         |                        | <a href="#">pyridoxal phosphate binding</a>                                                         | RT | 5     | 9.3E-1  | 1.0EO     |
| <input type="checkbox"/> | INTERPRO              |                        | <a href="#">Pyridoxal phosphate-dependent transferase, major region, subdomain 1</a>                | RT | 4     | 9.4E-1  | 1.0EO     |
|                          | Annotation Cluster 67 | Enrichment Score: 0.03 |                                                                                                     |    | Count | P_Value | Benjamini |
| <input type="checkbox"/> | INTERPRO              |                        | <a href="#">Zinc finger, C2H2-like</a>                                                              | RT | 9     | 9.2E-1  | 1.0EO     |
| <input type="checkbox"/> | SMART                 |                        | <a href="#">ZnF_C2H2</a>                                                                            | RT | 9     | 9.3E-1  | 1.0EO     |
| <input type="checkbox"/> | INTERPRO              |                        | <a href="#">Zinc finger, C2H2-type</a>                                                              | RT | 8     | 9.7E-1  | 1.0EO     |

| Annotation Cluster 68    |                 | Enrichment Score: 0.02                                                                |    |  | Count | P_Value | Benjamini |
|--------------------------|-----------------|---------------------------------------------------------------------------------------|----|--|-------|---------|-----------|
| <input type="checkbox"/> | GOTERM_MF_FAT   | <a href="#">nucleoside-triphosphatase regulator activity</a>                          | RT |  | 7     | 8.8E-1  | 1.0E0     |
| <input type="checkbox"/> | GOTERM_MF_FAT   | <a href="#">enzyme activator activity</a>                                             | RT |  | 5     | 8.8E-1  | 1.0E0     |
| <input type="checkbox"/> | GOTERM_BP_FAT   | <a href="#">regulation of Ras protein signal transduction</a>                         | RT |  | 4     | 9.5E-1  | 1.0E0     |
| <input type="checkbox"/> | GOTERM_BP_FAT   | <a href="#">regulation of small GTPase mediated signal transduction</a>               | RT |  | 4     | 9.5E-1  | 1.0E0     |
| <input type="checkbox"/> | GOTERM_MF_FAT   | <a href="#">GTPase regulator activity</a>                                             | RT |  | 5     | 9.6E-1  | 1.0E0     |
| <input type="checkbox"/> | GOTERM_MF_FAT   | <a href="#">small GTPase regulator activity</a>                                       | RT |  | 5     | 9.6E-1  | 1.0E0     |
| <input type="checkbox"/> | GOTERM_BP_FAT   | <a href="#">regulation of Ras GTPase activity</a>                                     | RT |  | 3     | 9.7E-1  | 1.0E0     |
| <input type="checkbox"/> | GOTERM_MF_FAT   | <a href="#">GTPase activator activity</a>                                             | RT |  | 3     | 9.8E-1  | 1.0E0     |
| <input type="checkbox"/> | GOTERM_BP_FAT   | <a href="#">regulation of GTPase activity</a>                                         | RT |  | 3     | 9.8E-1  | 1.0E0     |
| <input type="checkbox"/> | GOTERM_BP_FAT   | <a href="#">regulation of hydrolase activity</a>                                      | RT |  | 3     | 9.8E-1  | 1.0E0     |
| Annotation Cluster 69    |                 | Enrichment Score: 0.02                                                                |    |  | Count | P_Value | Benjamini |
| <input type="checkbox"/> | INTERPRO        | <a href="#">Anticodon-binding</a>                                                     | RT |  | 3     | 8.0E-1  | 1.0E0     |
| <input type="checkbox"/> | GOTERM_BP_FAT   | <a href="#">tRNA metabolic process</a>                                                | RT |  | 21    | 8.1E-1  | 1.0E0     |
| <input type="checkbox"/> | INTERPRO        | <a href="#">Aminoacyl-tRNA synthetase, class II (G, H, P and S), conserved region</a> | RT |  | 3     | 9.0E-1  | 1.0E0     |
| <input type="checkbox"/> | INTERPRO        | <a href="#">Aminoacyl-tRNA synthetase, class II, conserved region</a>                 | RT |  | 4     | 9.7E-1  | 1.0E0     |
| <input type="checkbox"/> | SP_PIR_KEYWORDS | <a href="#">Aminoacyl-tRNA synthetase</a>                                             | RT |  | 9     | 9.9E-1  | 1.0E0     |
| <input type="checkbox"/> | GOTERM_BP_FAT   | <a href="#">tRNA aminoacylation for protein translation</a>                           | RT |  | 8     | 9.9E-1  | 1.0E0     |
| <input type="checkbox"/> | KEGG_PATHWAY    | <a href="#">Aminoacyl-tRNA biosynthesis</a>                                           | RT |  | 8     | 9.9E-1  | 1.0E0     |
| <input type="checkbox"/> | GOTERM_BP_FAT   | <a href="#">tRNA aminoacylation</a>                                                   | RT |  | 8     | 1.0E0   | 1.0E0     |
| <input type="checkbox"/> | GOTERM_BP_FAT   | <a href="#">amino acid activation</a>                                                 | RT |  | 8     | 1.0E0   | 1.0E0     |
| <input type="checkbox"/> | GOTERM_MF_FAT   | <a href="#">ligase activity, forming carbon-oxygen bonds</a>                          | RT |  | 9     | 1.0E0   | 1.0E0     |
| <input type="checkbox"/> | GOTERM_MF_FAT   | <a href="#">aminoacyl-tRNA ligase activity</a>                                        | RT |  | 9     | 1.0E0   | 1.0E0     |
| <input type="checkbox"/> | GOTERM_MF_FAT   | <a href="#">ligase activity, forming aminoacyl-tRNA and related compounds</a>         | RT |  | 9     | 1.0E0   | 1.0E0     |
| Annotation Cluster 70    |                 | Enrichment Score: 0.02                                                                |    |  | Count | P_Value | Benjamini |
| <input type="checkbox"/> | INTERPRO        | <a href="#">DNA-dependent ATPase MCM</a>                                              | RT |  | 3     | 9.5E-1  | 1.0E0     |
| <input type="checkbox"/> | SMART           | <a href="#">MCM</a>                                                                   | RT |  | 3     | 9.5E-1  | 1.0E0     |
| <input type="checkbox"/> | INTERPRO        | <a href="#">Nucleic acid-binding, OB-fold</a>                                         | RT |  | 9     | 9.7E-1  | 1.0E0     |
| Annotation Cluster 71    |                 | Enrichment Score: 0.02                                                                |    |  | Count | P_Value | Benjamini |
| <input type="checkbox"/> | INTERPRO        | <a href="#">Kelch repeat type 1</a>                                                   | RT |  | 3     | 9.5E-1  | 1.0E0     |
| <input type="checkbox"/> | SMART           | <a href="#">Kelch</a>                                                                 | RT |  | 3     | 9.5E-1  | 1.0E0     |
| <input type="checkbox"/> | INTERPRO        | <a href="#">Kelch-type beta propeller</a>                                             | RT |  | 3     | 9.8E-1  | 1.0E0     |
| Annotation Cluster 72    |                 | Enrichment Score: 0.01                                                                |    |  | Count | P_Value | Benjamini |
| <input type="checkbox"/> | INTERPRO        | <a href="#">Peptidyl-prolyl cis-trans isomerase, FKBP-type</a>                        | RT |  | 3     | 9.5E-1  | 1.0E0     |
| <input type="checkbox"/> | SP_PIR_KEYWORDS | <a href="#">Rotamase</a>                                                              | RT |  | 3     | 9.9E-1  | 1.0E0     |
| <input type="checkbox"/> | GOTERM_MF_FAT   | <a href="#">cis-trans isomerase activity</a>                                          | RT |  | 3     | 9.9E-1  | 1.0E0     |
| <input type="checkbox"/> | GOTERM_MF_FAT   | <a href="#">peptidyl-prolyl cis-trans isomerase activity</a>                          | RT |  | 3     | 9.9E-1  | 1.0E0     |
| Annotation Cluster 73    |                 | Enrichment Score: 0.01                                                                |    |  | Count | P_Value | Benjamini |
| <input type="checkbox"/> | INTERPRO        | <a href="#">Chaperonin TCP-1, conserved site</a>                                      | RT |  | 4     | 9.7E-1  | 1.0E0     |
| <input type="checkbox"/> | INTERPRO        | <a href="#">Chaperonin Cpn60/TCP-1</a>                                                | RT |  | 4     | 9.7E-1  | 1.0E0     |
| <input type="checkbox"/> | PIR_SUPERFAMILY | PIRSF002584: molecular chaperone t-complex-type                                       | RT |  | 3     | 9.9E-1  | 1.0E0     |
| <input type="checkbox"/> | INTERPRO        | <a href="#">Chaperone, tailless complex polypeptide 1</a>                             | RT |  | 3     | 9.9E-1  | 1.0E0     |
| <input type="checkbox"/> | SP_PIR_KEYWORDS | <a href="#">cytoplasm</a>                                                             | RT |  | 7     | 9.9E-1  | 1.0E0     |
| <input type="checkbox"/> | SP_PIR_KEYWORDS | <a href="#">Chaperone</a>                                                             | RT |  | 4     | 1.0E0   | 1.0E0     |
| <input type="checkbox"/> | GOTERM_MF_FAT   | <a href="#">unfolded protein binding</a>                                              | RT |  | 7     | 1.0E0   | 1.0E0     |
| Annotation Cluster 74    |                 | Enrichment Score: 0.01                                                                |    |  | Count | P_Value | Benjamini |
| <input type="checkbox"/> | INTERPRO        | <a href="#">Molecular chaperone, heat shock protein, Hsp40, DnaJ</a>                  | RT |  | 3     | 9.8E-1  | 1.0E0     |
| <input type="checkbox"/> | INTERPRO        | <a href="#">Heat shock protein DnaJ, N-terminal</a>                                   | RT |  | 3     | 9.9E-1  | 1.0E0     |
| <input type="checkbox"/> | GOTERM_MF_FAT   | <a href="#">heat shock protein binding</a>                                            | RT |  | 3     | 9.9E-1  | 1.0E0     |
| <input type="checkbox"/> | SMART           | <a href="#">DnaJ</a>                                                                  | RT |  | 3     | 9.9E-1  | 1.0E0     |
| Annotation Cluster 75    |                 | Enrichment Score: 0                                                                   |    |  | Count | P_Value | Benjamini |
| <input type="checkbox"/> | GOTERM_BP_FAT   | <a href="#">ribonucleoprotein complex biogenesis</a>                                  | RT |  | 8     | 9.8E-1  | 1.0E0     |
| <input type="checkbox"/> | GOTERM_BP_FAT   | <a href="#">ribosome biogenesis</a>                                                   | RT |  | 8     | 9.8E-1  | 1.0E0     |
| <input type="checkbox"/> | GOTERM_BP_FAT   | <a href="#">rRNA metabolic process</a>                                                | RT |  | 4     | 1.0E0   | 1.0E0     |
| <input type="checkbox"/> | GOTERM_BP_FAT   | <a href="#">rRNA processing</a>                                                       | RT |  | 4     | 1.0E0   | 1.0E0     |

212 terms were not clustered.

---

Please cite [Nature Protocols 2009; 4\(1\):44](#) & [Genome Biology 2003; 4\(5\):P3](#) within any publication that makes use of any methods inspired by DAVID.

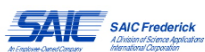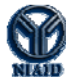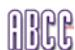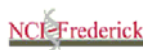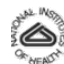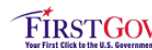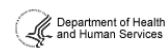

[Term of Service](#) | [Contact Us](#) | [Site Map](#)



## Functional Annotation Clustering

[Help and Manual](#)

Current Gene List: 3\_Random4

Current Background: Giardia intestinalis

3000 DAVID IDs

Options Classification Stringency Medium

Rerun using options

Create Sublist

79 Cluster(s)

[Download File](#)

|                          | Annotation Cluster 1 | Enrichment Score: 0.77                                                       |    |  | Count | P_Value | Benjamini |
|--------------------------|----------------------|------------------------------------------------------------------------------|----|--|-------|---------|-----------|
| <input type="checkbox"/> | GOTERM_MF_FAT        | <a href="#">calcium ion binding</a>                                          | RT |  | 32    | 2.7E-2  | 1.0EO     |
| <input type="checkbox"/> | GOTERM_MF_FAT        | <a href="#">calcium-dependent phospholipid binding</a>                       | RT |  | 18    | 3.8E-2  | 1.0EO     |
| <input type="checkbox"/> | GOTERM_BP_FAT        | <a href="#">cytoskeleton organization</a>                                    | RT |  | 14    | 3.9E-2  | 1.0EO     |
| <input type="checkbox"/> | INTERPRO             | <a href="#">Alpha giardin</a>                                                | RT |  | 10    | 1.9E-1  | 1.0EO     |
| <input type="checkbox"/> | SP_PIR_KEYWORDS      | <a href="#">annexin</a>                                                      | RT |  | 12    | 2.4E-1  | 1.0EO     |
| <input type="checkbox"/> | INTERPRO             | <a href="#">Annexin</a>                                                      | RT |  | 12    | 2.8E-1  | 1.0EO     |
| <input type="checkbox"/> | GOTERM_MF_FAT        | <a href="#">phospholipid binding</a>                                         | RT |  | 18    | 3.3E-1  | 1.0EO     |
| <input type="checkbox"/> | INTERPRO             | <a href="#">Annexin repeat</a>                                               | RT |  | 10    | 4.3E-1  | 1.0EO     |
| <input type="checkbox"/> | SMART                | <a href="#">ANX</a>                                                          | RT |  | 10    | 4.3E-1  | 1.0EO     |
| <input type="checkbox"/> | GOTERM_MF_FAT        | <a href="#">lipid binding</a>                                                | RT |  | 21    | 6.3E-1  | 1.0EO     |
|                          | Annotation Cluster 2 | Enrichment Score: 0.74                                                       |    |  | Count | P_Value | Benjamini |
| <input type="checkbox"/> | GOTERM_MF_FAT        | <a href="#">protein kinase regulator activity</a>                            | RT |  | 7     | 1.2E-1  | 1.0EO     |
| <input type="checkbox"/> | GOTERM_MF_FAT        | <a href="#">kinase regulator activity</a>                                    | RT |  | 7     | 1.2E-1  | 1.0EO     |
| <input type="checkbox"/> | GOTERM_MF_FAT        | <a href="#">cAMP-dependent protein kinase regulator activity</a>             | RT |  | 4     | 4.2E-1  | 1.0EO     |
|                          | Annotation Cluster 3 | Enrichment Score: 0.57                                                       |    |  | Count | P_Value | Benjamini |
| <input type="checkbox"/> | SP_PIR_KEYWORDS      | <a href="#">cyclin</a>                                                       | RT |  | 9     | 1.2E-1  | 1.0EO     |
| <input type="checkbox"/> | INTERPRO             | <a href="#">Cyclin, N-terminal</a>                                           | RT |  | 6     | 2.1E-1  | 1.0EO     |
| <input type="checkbox"/> | INTERPRO             | <a href="#">Cyclin-related</a>                                               | RT |  | 6     | 2.1E-1  | 1.0EO     |
| <input type="checkbox"/> | INTERPRO             | <a href="#">Cyclin</a>                                                       | RT |  | 5     | 3.1E-1  | 1.0EO     |
| <input type="checkbox"/> | SMART                | <a href="#">CYCLIN</a>                                                       | RT |  | 5     | 3.1E-1  | 1.0EO     |
| <input type="checkbox"/> | INTERPRO             | <a href="#">Cyclin, C-terminal</a>                                           | RT |  | 3     | 8.0E-1  | 1.0EO     |
|                          | Annotation Cluster 4 | Enrichment Score: 0.54                                                       |    |  | Count | P_Value | Benjamini |
| <input type="checkbox"/> | INTERPRO             | <a href="#">Like-Sm ribonucleoprotein, core</a>                              | RT |  | 10    | 9.7E-2  | 1.0EO     |
| <input type="checkbox"/> | INTERPRO             | <a href="#">Like-Sm ribonucleoprotein, eukaryotic and archaea-type, core</a> | RT |  | 6     | 3.8E-1  | 1.0EO     |
| <input type="checkbox"/> | SMART                | <a href="#">Sm</a>                                                           | RT |  | 6     | 3.8E-1  | 1.0EO     |
| <input type="checkbox"/> | SP_PIR_KEYWORDS      | <a href="#">viral nucleoprotein</a>                                          | RT |  | 10    | 5.1E-1  | 1.0EO     |
|                          | Annotation Cluster 5 | Enrichment Score: 0.53                                                       |    |  | Count | P_Value | Benjamini |
| <input type="checkbox"/> | SP_PIR_KEYWORDS      | <a href="#">ank repeat</a>                                                   | RT |  | 181   | 2.1E-1  | 1.0EO     |
| <input type="checkbox"/> | SMART                | <a href="#">ANK</a>                                                          | RT |  | 258   | 3.5E-1  | 1.0EO     |
| <input type="checkbox"/> | INTERPRO             | <a href="#">Ankyrin</a>                                                      | RT |  | 258   | 3.5E-1  | 1.0EO     |
|                          | Annotation Cluster 6 | Enrichment Score: 0.48                                                       |    |  | Count | P_Value | Benjamini |
| <input type="checkbox"/> | GOTERM_BP_FAT        | <a href="#">RNA modification</a>                                             | RT |  | 14    | 3.9E-2  | 1.0EO     |
| <input type="checkbox"/> | GOTERM_MF_FAT        | <a href="#">pseudouridine synthase activity</a>                              | RT |  | 6     | 3.5E-1  | 1.0EO     |
| <input type="checkbox"/> | GOTERM_BP_FAT        | <a href="#">pseudouridine synthesis</a>                                      | RT |  | 6     | 3.6E-1  | 1.0EO     |
| <input type="checkbox"/> | PIR_SUPERFAMILY      | PIRSF001430: tRNA_psdUrid_synth                                              | RT |  | 3     | 6.1E-1  | 1.0EO     |
| <input type="checkbox"/> | INTERPRO             | <a href="#">Pseudouridine synthase I, TruA</a>                               | RT |  | 3     | 6.2E-1  | 1.0EO     |
| <input type="checkbox"/> | GOTERM_MF_FAT        | <a href="#">intramolecular transferase activity</a>                          | RT |  | 7     | 6.8E-1  | 1.0EO     |
|                          | Annotation Cluster 7 | Enrichment Score: 0.47                                                       |    |  | Count | P_Value | Benjamini |
| <input type="checkbox"/> | GOTERM_MF_FAT        | <a href="#">protein serine/threonine kinase activity</a>                     | RT |  | 68    | 6.3E-2  | 1.0EO     |
| <input type="checkbox"/> | SP_PIR_KEYWORDS      | <a href="#">kinase</a>                                                       | RT |  | 200   | 6.4E-2  | 1.0EO     |
| <input type="checkbox"/> | INTERPRO             | <a href="#">Serine/threonine protein kinase, active site</a>                 | RT |  | 60    | 7.2E-2  | 1.0EO     |
| <input type="checkbox"/> | GOTERM_MF_FAT        | <a href="#">protein kinase activity</a>                                      | RT |  | 163   | 1.2E-1  | 1.0EO     |
| <input type="checkbox"/> | GOTERM_BP_FAT        | <a href="#">protein amino acid phosphorylation</a>                           | RT |  | 162   | 1.2E-1  | 1.0EO     |
| <input type="checkbox"/> | INTERPRO             | <a href="#">Protein kinase, core</a>                                         | RT |  | 162   | 2.1E-1  | 1.0EO     |
| <input type="checkbox"/> | SP_PIR_KEYWORDS      | <a href="#">serine/threonine-protein kinase</a>                              | RT |  | 39    | 2.3E-1  | 1.0EO     |



|                          |                       |                                                                          |    |  |       |         |           |
|--------------------------|-----------------------|--------------------------------------------------------------------------|----|--|-------|---------|-----------|
| <input type="checkbox"/> | GOTERM_BP_FAT         | <a href="#">phosphorylation</a>                                          | RT |  | 170   | 2.3E-1  | 1.0E0     |
| <input type="checkbox"/> | GOTERM_BP_FAT         | <a href="#">phosphate metabolic process</a>                              | RT |  | 179   | 2.4E-1  | 1.0E0     |
| <input type="checkbox"/> | GOTERM_BP_FAT         | <a href="#">phosphorus metabolic process</a>                             | RT |  | 179   | 2.4E-1  | 1.0E0     |
| <input type="checkbox"/> | INTERPRO              | <a href="#">Protein kinase, ATP binding site</a>                         | RT |  | 52    | 2.7E-1  | 1.0E0     |
| <input type="checkbox"/> | INTERPRO              | <a href="#">Serine/threonine protein kinase-related</a>                  | RT |  | 140   | 3.2E-1  | 1.0E0     |
| <input type="checkbox"/> | INTERPRO              | <a href="#">Serine/threonine protein kinase</a>                          | RT |  | 36    | 4.3E-1  | 1.0E0     |
| <input type="checkbox"/> | SMART                 | <a href="#">S_TKc</a>                                                    | RT |  | 36    | 4.3E-1  | 1.0E0     |
| <input type="checkbox"/> | GOTERM_MF_FAT         | <a href="#">nucleoside binding</a>                                       | RT |  | 301   | 6.4E-1  | 1.0E0     |
| <input type="checkbox"/> | GOTERM_MF_FAT         | <a href="#">purine nucleoside binding</a>                                | RT |  | 298   | 6.7E-1  | 1.0E0     |
| <input type="checkbox"/> | GOTERM_MF_FAT         | <a href="#">adenyl nucleotide binding</a>                                | RT |  | 298   | 6.7E-1  | 1.0E0     |
| <input type="checkbox"/> | GOTERM_MF_FAT         | <a href="#">adenyl ribonucleotide binding</a>                            | RT |  | 294   | 6.7E-1  | 1.0E0     |
| <input type="checkbox"/> | GOTERM_MF_FAT         | <a href="#">ATP binding</a>                                              | RT |  | 294   | 6.7E-1  | 1.0E0     |
| <input type="checkbox"/> | GOTERM_MF_FAT         | <a href="#">purine nucleotide binding</a>                                | RT |  | 320   | 8.4E-1  | 1.0E0     |
| <input type="checkbox"/> | GOTERM_MF_FAT         | <a href="#">ribonucleotide binding</a>                                   | RT |  | 316   | 8.5E-1  | 1.0E0     |
| <input type="checkbox"/> | GOTERM_MF_FAT         | <a href="#">purine ribonucleotide binding</a>                            | RT |  | 316   | 8.5E-1  | 1.0E0     |
| <input type="checkbox"/> | GOTERM_MF_FAT         | <a href="#">nucleotide binding</a>                                       | RT |  | 340   | 8.5E-1  | 1.0E0     |
| <input type="checkbox"/> | SP_PIR_KEYWORDS       | <a href="#">atp-binding</a>                                              | RT |  | 139   | 8.6E-1  | 9.9E-1    |
| <input type="checkbox"/> | SP_PIR_KEYWORDS       | <a href="#">nucleotide-binding</a>                                       | RT |  | 142   | 9.5E-1  | 1.0E0     |
|                          | Annotation Cluster 8  | Enrichment Score: 0.39                                                   |    |  | Count | P_Value | Benjamini |
| <input type="checkbox"/> | GOTERM_MF_FAT         | <a href="#">nucleotide kinase activity</a>                               | RT |  | 5     | 2.8E-1  | 1.0E0     |
| <input type="checkbox"/> | GOTERM_MF_FAT         | <a href="#">nucleobase, nucleoside, nucleotide kinase activity</a>       | RT |  | 8     | 3.1E-1  | 1.0E0     |
| <input type="checkbox"/> | GOTERM_MF_FAT         | <a href="#">phosphotransferase activity, phosphate group as acceptor</a> | RT |  | 6     | 3.5E-1  | 1.0E0     |
| <input type="checkbox"/> | GOTERM_MF_FAT         | <a href="#">adenylate kinase activity</a>                                | RT |  | 3     | 6.0E-1  | 1.0E0     |
| <input type="checkbox"/> | INTERPRO              | <a href="#">Adenylate kinase</a>                                         | RT |  | 3     | 6.2E-1  | 1.0E0     |
|                          | Annotation Cluster 9  | Enrichment Score: 0.38                                                   |    |  | Count | P_Value | Benjamini |
| <input type="checkbox"/> | INTERPRO              | <a href="#">Helicase, superfamily 1 and 2, ATP-binding</a>               | RT |  | 29    | 2.2E-1  | 1.0E0     |
| <input type="checkbox"/> | INTERPRO              | <a href="#">DEAD-like helicase, N-terminal</a>                           | RT |  | 29    | 2.2E-1  | 1.0E0     |
| <input type="checkbox"/> | SMART                 | <a href="#">DEXDc</a>                                                    | RT |  | 29    | 2.2E-1  | 1.0E0     |
| <input type="checkbox"/> | INTERPRO              | <a href="#">DNA/RNA helicase, C-terminal</a>                             | RT |  | 29    | 2.9E-1  | 1.0E0     |
| <input type="checkbox"/> | SMART                 | <a href="#">HELICc</a>                                                   | RT |  | 29    | 2.9E-1  | 1.0E0     |
| <input type="checkbox"/> | GOTERM_MF_FAT         | <a href="#">helicase activity</a>                                        | RT |  | 34    | 3.1E-1  | 1.0E0     |
| <input type="checkbox"/> | SP_PIR_KEYWORDS       | <a href="#">helicase</a>                                                 | RT |  | 28    | 3.2E-1  | 1.0E0     |
| <input type="checkbox"/> | GOTERM_MF_FAT         | <a href="#">purine NTP-dependent helicase activity</a>                   | RT |  | 23    | 5.2E-1  | 1.0E0     |
| <input type="checkbox"/> | GOTERM_MF_FAT         | <a href="#">ATP-dependent helicase activity</a>                          | RT |  | 23    | 5.2E-1  | 1.0E0     |
| <input type="checkbox"/> | INTERPRO              | <a href="#">DNA/RNA helicase, DEAD/DEAH box type, N-terminal</a>         | RT |  | 18    | 6.5E-1  | 1.0E0     |
| <input type="checkbox"/> | INTERPRO              | <a href="#">RNA helicase, DEAD-box type, Q motif</a>                     | RT |  | 10    | 7.6E-1  | 1.0E0     |
| <input type="checkbox"/> | GOTERM_MF_FAT         | <a href="#">ATPase activity, coupled</a>                                 | RT |  | 34    | 9.6E-1  | 1.0E0     |
| <input type="checkbox"/> | GOTERM_MF_FAT         | <a href="#">ATPase activity</a>                                          | RT |  | 45    | 9.8E-1  | 1.0E0     |
|                          | Annotation Cluster 10 | Enrichment Score: 0.37                                                   |    |  | Count | P_Value | Benjamini |
| <input type="checkbox"/> | GOTERM_CC_FAT         | <a href="#">microtubule organizing center</a>                            | RT |  | 4     | 4.2E-1  | 1.0E0     |
| <input type="checkbox"/> | GOTERM_CC_FAT         | <a href="#">spindle</a>                                                  | RT |  | 4     | 4.2E-1  | 1.0E0     |
| <input type="checkbox"/> | GOTERM_CC_FAT         | <a href="#">spindle pole</a>                                             | RT |  | 4     | 4.2E-1  | 1.0E0     |
| <input type="checkbox"/> | GOTERM_BP_FAT         | <a href="#">microtubule cytoskeleton organization</a>                    | RT |  | 4     | 4.2E-1  | 1.0E0     |
| <input type="checkbox"/> | INTERPRO              | <a href="#">Spc97/Spc98</a>                                              | RT |  | 4     | 4.5E-1  | 1.0E0     |
|                          | Annotation Cluster 11 | Enrichment Score: 0.36                                                   |    |  | Count | P_Value | Benjamini |
| <input type="checkbox"/> | GOTERM_BP_FAT         | <a href="#">translational initiation</a>                                 | RT |  | 9     | 2.3E-1  | 1.0E0     |
| <input type="checkbox"/> | GOTERM_MF_FAT         | <a href="#">translation initiation factor activity</a>                   | RT |  | 16    | 4.6E-1  | 1.0E0     |
| <input type="checkbox"/> | SP_PIR_KEYWORDS       | <a href="#">Initiation factor</a>                                        | RT |  | 12    | 5.6E-1  | 1.0E0     |
| <input type="checkbox"/> | GOTERM_MF_FAT         | <a href="#">translation factor activity, nucleic acid binding</a>        | RT |  | 19    | 6.0E-1  | 1.0E0     |
|                          | Annotation Cluster 12 | Enrichment Score: 0.33                                                   |    |  | Count | P_Value | Benjamini |
| <input type="checkbox"/> | GOTERM_BP_FAT         | <a href="#">RNA methylation</a>                                          | RT |  | 5     | 2.9E-1  | 1.0E0     |
| <input type="checkbox"/> | INTERPRO              | <a href="#">Ribosomal RNA methyltransferase RrmJ/FtsJ</a>                | RT |  | 4     | 4.5E-1  | 1.0E0     |
| <input type="checkbox"/> | GOTERM_BP_FAT         | <a href="#">biopolymer methylation</a>                                   | RT |  | 5     | 4.8E-1  | 1.0E0     |
| <input type="checkbox"/> | GOTERM_BP_FAT         | <a href="#">methylation</a>                                              | RT |  | 7     | 5.6E-1  | 1.0E0     |
| <input type="checkbox"/> | GOTERM_BP_FAT         | <a href="#">one-carbon metabolic process</a>                             | RT |  | 7     | 6.9E-1  | 1.0E0     |
|                          | Annotation Cluster 13 | Enrichment Score: 0.32                                                   |    |  | Count | P_Value | Benjamini |
| <input type="checkbox"/> | INTERPRO              | <a href="#">EGF</a>                                                      | RT |  | 6     | 3.8E-1  | 1.0E0     |

| <input type="checkbox"/> | Category         | Term                                                                                                | RT                     | Count | P_Value | Benjamini |
|--------------------------|------------------|-----------------------------------------------------------------------------------------------------|------------------------|-------|---------|-----------|
| <input type="checkbox"/> | INTERPRO         | <a href="#">EGF_extracellular</a>                                                                   | RT                     | 15    | 4.9E-1  | 1.0E0     |
| <input type="checkbox"/> | INTERPRO         | <a href="#">EGF-like_type 3</a>                                                                     | RT                     | 20    | 5.2E-1  | 1.0E0     |
| <input type="checkbox"/> | SP_PIR_KEYWORDS  | <a href="#">egf-like domain</a>                                                                     | RT                     | 11    | 5.4E-1  | 1.0E0     |
|                          |                  | Annotation Cluster 14                                                                               | Enrichment Score: 0.32 |       |         |           |
| <input type="checkbox"/> | GOTERM_BP_FAT    | <a href="#">RNA capping</a>                                                                         | RT                     | 5     | 2.9E-1  | 1.0E0     |
| <input type="checkbox"/> | GOTERM_BP_FAT    | <a href="#">mRNA metabolic process</a>                                                              | RT                     | 5     | 4.8E-1  | 1.0E0     |
| <input type="checkbox"/> | GOTERM_BP_FAT    | <a href="#">mRNA capping</a>                                                                        | RT                     | 3     | 6.1E-1  | 1.0E0     |
| <input type="checkbox"/> | GOTERM_BP_FAT    | <a href="#">mRNA processing</a>                                                                     | RT                     | 4     | 6.3E-1  | 1.0E0     |
|                          |                  | Annotation Cluster 15                                                                               | Enrichment Score: 0.32 |       |         |           |
| <input type="checkbox"/> | GOTERM_BP_FAT    | <a href="#">protein amino acid dephosphorylation</a>                                                | RT                     | 10    | 2.7E-1  | 1.0E0     |
| <input type="checkbox"/> | GOTERM_MF_FAT    | <a href="#">protein tyrosine/serine/threonine phosphatase activity</a>                              | RT                     | 5     | 2.8E-1  | 1.0E0     |
| <input type="checkbox"/> | INTERPRO         | <a href="#">Dual specificity phosphatase_catalytic domain</a>                                       | RT                     | 5     | 3.1E-1  | 1.0E0     |
| <input type="checkbox"/> | INTERPRO         | <a href="#">Protein-tyrosine phosphatase_dual specificity</a>                                       | RT                     | 5     | 3.1E-1  | 1.0E0     |
| <input type="checkbox"/> | GOTERM_BP_FAT    | <a href="#">dephosphorylation</a>                                                                   | RT                     | 10    | 6.3E-1  | 1.0E0     |
| <input type="checkbox"/> | INTERPRO         | <a href="#">Protein-tyrosine phosphatase</a>                                                        | RT                     | 4     | 6.5E-1  | 1.0E0     |
| <input type="checkbox"/> | INTERPRO         | <a href="#">Dual-specific/protein-tyrosine phosphatase conserved region</a>                         | RT                     | 4     | 6.5E-1  | 1.0E0     |
| <input type="checkbox"/> | INTERPRO         | <a href="#">Protein-tyrosine phosphatase_active site</a>                                            | RT                     | 4     | 8.0E-1  | 1.0E0     |
| <input type="checkbox"/> | GOTERM_MF_FAT    | <a href="#">protein tyrosine phosphatase activity</a>                                               | RT                     | 4     | 8.7E-1  | 1.0E0     |
|                          |                  | Annotation Cluster 16                                                                               | Enrichment Score: 0.3  |       |         |           |
| <input type="checkbox"/> | KEGG_PATHWAY     | <a href="#">Pyrimidine metabolism</a>                                                               | RT                     | 21    | 3.4E-1  | 1.0E0     |
| <input type="checkbox"/> | GOTERM_BP_FAT    | <a href="#">transcription</a>                                                                       | RT                     | 17    | 4.0E-1  | 1.0E0     |
| <input type="checkbox"/> | KEGG_PATHWAY     | <a href="#">RNA polymerase</a>                                                                      | RT                     | 12    | 4.1E-1  | 1.0E0     |
| <input type="checkbox"/> | GOTERM_MF_FAT    | <a href="#">DNA-directed RNA polymerase activity</a>                                                | RT                     | 15    | 4.3E-1  | 1.0E0     |
| <input type="checkbox"/> | GOTERM_MF_FAT    | <a href="#">RNA polymerase activity</a>                                                             | RT                     | 15    | 5.3E-1  | 1.0E0     |
| <input type="checkbox"/> | KEGG_PATHWAY     | <a href="#">Purine metabolism</a>                                                                   | RT                     | 19    | 5.5E-1  | 1.0E0     |
| <input type="checkbox"/> | SP_PIR_KEYWORDS  | <a href="#">dna-directed rna polymerase</a>                                                         | RT                     | 9     | 6.0E-1  | 1.0E0     |
| <input type="checkbox"/> | SP_PIR_KEYWORDS  | <a href="#">nucleotidyltransferase</a>                                                              | RT                     | 11    | 9.7E-1  | 1.0E0     |
|                          |                  | Annotation Cluster 17                                                                               | Enrichment Score: 0.3  |       |         |           |
| <input type="checkbox"/> | GOTERM_BP_FAT    | <a href="#">protein amino acid dephosphorylation</a>                                                | RT                     | 10    | 2.7E-1  | 1.0E0     |
| <input type="checkbox"/> | GOTERM_MF_FAT    | <a href="#">iron ion binding</a>                                                                    | RT                     | 20    | 3.8E-1  | 1.0E0     |
| <input type="checkbox"/> | GOTERM_MF_FAT    | <a href="#">phosphoprotein phosphatase activity</a>                                                 | RT                     | 18    | 4.1E-1  | 1.0E0     |
| <input type="checkbox"/> | GOTERM_MF_FAT    | <a href="#">phosphatase activity</a>                                                                | RT                     | 27    | 4.4E-1  | 1.0E0     |
| <input type="checkbox"/> | INTERPRO         | <a href="#">Metallophosphoesterase</a>                                                              | RT                     | 14    | 4.6E-1  | 1.0E0     |
| <input type="checkbox"/> | PIRS_SUPERFAMILY | PIRSF000908: serine/threonine-protein phosphatase, conventional type                                | RT                     | 6     | 5.3E-1  | 1.0E0     |
| <input type="checkbox"/> | GOTERM_BP_FAT    | <a href="#">dephosphorylation</a>                                                                   | RT                     | 10    | 6.3E-1  | 1.0E0     |
| <input type="checkbox"/> | SP_PIR_KEYWORDS  | <a href="#">iron</a>                                                                                | RT                     | 12    | 6.5E-1  | 9.9E-1    |
| <input type="checkbox"/> | INTERPRO         | <a href="#">Serine/threonine-specific protein phosphatase and bis(5-nucleosyl)-tetraphosphatase</a> | RT                     | 9     | 7.4E-1  | 1.0E0     |
| <input type="checkbox"/> | SMART            | <a href="#">PP2Ac</a>                                                                               | RT                     | 9     | 7.5E-1  | 1.0E0     |
|                          |                  | Annotation Cluster 18                                                                               | Enrichment Score: 0.29 |       |         |           |
| <input type="checkbox"/> | SP_PIR_KEYWORDS  | <a href="#">tpr repeat</a>                                                                          | RT                     | 7     | 4.0E-1  | 1.0E0     |
| <input type="checkbox"/> | INTERPRO         | <a href="#">Tetratricopeptide region</a>                                                            | RT                     | 16    | 4.2E-1  | 1.0E0     |
| <input type="checkbox"/> | INTERPRO         | <a href="#">Tetratricopeptide TPR-1</a>                                                             | RT                     | 13    | 5.3E-1  | 1.0E0     |
| <input type="checkbox"/> | INTERPRO         | <a href="#">Tetratricopeptide repeat</a>                                                            | RT                     | 15    | 5.8E-1  | 1.0E0     |
| <input type="checkbox"/> | INTERPRO         | <a href="#">Tetratricopeptide-like helical</a>                                                      | RT                     | 19    | 5.9E-1  | 1.0E0     |
| <input type="checkbox"/> | SMART            | <a href="#">TPR</a>                                                                                 | RT                     | 15    | 5.9E-1  | 1.0E0     |
|                          |                  | Annotation Cluster 19                                                                               | Enrichment Score: 0.28 |       |         |           |
| <input type="checkbox"/> | INTERPRO         | <a href="#">Furin-like repeat</a>                                                                   | RT                     | 110   | 4.2E-1  | 1.0E0     |
| <input type="checkbox"/> | SMART            | <a href="#">FU</a>                                                                                  | RT                     | 110   | 4.3E-1  | 1.0E0     |
| <input type="checkbox"/> | INTERPRO         | <a href="#">Giardia variant-specific surface protein</a>                                            | RT                     | 138   | 5.6E-1  | 1.0E0     |
| <input type="checkbox"/> | INTERPRO         | <a href="#">EGF-like</a>                                                                            | RT                     | 110   | 6.3E-1  | 1.0E0     |
| <input type="checkbox"/> | SMART            | <a href="#">EGF</a>                                                                                 | RT                     | 110   | 6.4E-1  | 1.0E0     |
|                          |                  | Annotation Cluster 20                                                                               | Enrichment Score: 0.27 |       |         |           |
| <input type="checkbox"/> | GOTERM_BP_FAT    | <a href="#">purine nucleoside metabolic process</a>                                                 | RT                     | 4     | 4.2E-1  | 1.0E0     |
| <input type="checkbox"/> | GOTERM_BP_FAT    | <a href="#">purine ribonucleoside metabolic process</a>                                             | RT                     | 4     | 4.2E-1  | 1.0E0     |
| <input type="checkbox"/> | GOTERM_BP_FAT    | <a href="#">ribonucleoside metabolic process</a>                                                    | RT                     | 5     | 6.5E-1  | 1.0E0     |
| <input type="checkbox"/> | GOTERM_BP_FAT    | <a href="#">nucleoside metabolic process</a>                                                        | RT                     | 8     | 7.0E-1  | 1.0E0     |
|                          |                  | Annotation Cluster 21                                                                               | Enrichment Score: 0.26 |       |         |           |

| <input type="checkbox"/> | INTERPRO              | <a href="#">SANT_DNA-binding</a>                                                                 | RT |  |  |  | 8     | 3.4E-1  | 1.0E0     |  |
|--------------------------|-----------------------|--------------------------------------------------------------------------------------------------|----|--|--|--|-------|---------|-----------|--|
| <input type="checkbox"/> | SMART                 | <a href="#">SANT</a>                                                                             | RT |  |  |  | 8     | 3.4E-1  | 1.0E0     |  |
| <input type="checkbox"/> | INTERPRO              | <a href="#">Myb_DNA-binding</a>                                                                  | RT |  |  |  | 4     | 6.5E-1  | 1.0E0     |  |
| <input type="checkbox"/> | INTERPRO              | <a href="#">Myb transcription factor</a>                                                         | RT |  |  |  | 3     | 8.0E-1  | 1.0E0     |  |
| <input type="checkbox"/> | INTERPRO              | <a href="#">Myb-type HTH DNA-binding domain</a>                                                  | RT |  |  |  | 3     | 8.0E-1  | 1.0E0     |  |
|                          | Annotation Cluster 22 | Enrichment Score: 0.26                                                                           |    |  |  |  | Count | P_Value | Benjamini |  |
| <input type="checkbox"/> | GOTERM_BP_FAT         | <a href="#">cellular response to stress</a>                                                      | RT |  |  |  | 14    | 4.1E-1  | 1.0E0     |  |
| <input type="checkbox"/> | GOTERM_BP_FAT         | <a href="#">DNA repair</a>                                                                       | RT |  |  |  | 13    | 4.9E-1  | 1.0E0     |  |
| <input type="checkbox"/> | GOTERM_BP_FAT         | <a href="#">response to DNA damage stimulus</a>                                                  | RT |  |  |  | 13    | 4.9E-1  | 1.0E0     |  |
| <input type="checkbox"/> | GOTERM_BP_FAT         | <a href="#">DNA metabolic process</a>                                                            | RT |  |  |  | 30    | 9.2E-1  | 1.0E0     |  |
|                          | Annotation Cluster 23 | Enrichment Score: 0.26                                                                           |    |  |  |  | Count | P_Value | Benjamini |  |
| <input type="checkbox"/> | INTERPRO              | <a href="#">Protein of unknown function DUF6_transmembrane</a>                                   | RT |  |  |  | 4     | 4.5E-1  | 1.0E0     |  |
| <input type="checkbox"/> | PIR_SUPERFAMILY       | PIRSF036436:UCP036436                                                                            | RT |  |  |  | 3     | 6.1E-1  | 1.0E0     |  |
| <input type="checkbox"/> | INTERPRO              | <a href="#">Uncharacterised conserved protein UCP036436_nucleotide-sugar transporter-related</a> | RT |  |  |  | 3     | 6.2E-1  | 1.0E0     |  |
|                          | Annotation Cluster 24 | Enrichment Score: 0.25                                                                           |    |  |  |  | Count | P_Value | Benjamini |  |
| <input type="checkbox"/> | INTERPRO              | <a href="#">Radical SAM</a>                                                                      | RT |  |  |  | 4     | 4.5E-1  | 1.0E0     |  |
| <input type="checkbox"/> | INTERPRO              | <a href="#">Elongator protein 3/MlaB/NiFB</a>                                                    | RT |  |  |  | 3     | 6.2E-1  | 1.0E0     |  |
| <input type="checkbox"/> | SMART                 | <a href="#">Ftp3</a>                                                                             | RT |  |  |  | 3     | 6.2E-1  | 1.0E0     |  |
|                          | Annotation Cluster 25 | Enrichment Score: 0.25                                                                           |    |  |  |  | Count | P_Value | Benjamini |  |
| <input type="checkbox"/> | GOTERM_BP_FAT         | <a href="#">nucleotide catabolic process</a>                                                     | RT |  |  |  | 4     | 4.2E-1  | 1.0E0     |  |
| <input type="checkbox"/> | GOTERM_BP_FAT         | <a href="#">nitrogen compound catabolic process</a>                                              | RT |  |  |  | 5     | 4.8E-1  | 1.0E0     |  |
| <input type="checkbox"/> | GOTERM_BP_FAT         | <a href="#">nucleobase_nucleoside and nucleotide catabolic process</a>                           | RT |  |  |  | 5     | 4.8E-1  | 1.0E0     |  |
| <input type="checkbox"/> | GOTERM_BP_FAT         | <a href="#">nucleobase_nucleoside_nucleotide and nucleic acid catabolic process</a>              | RT |  |  |  | 5     | 4.8E-1  | 1.0E0     |  |
| <input type="checkbox"/> | PIR_SUPERFAMILY       | PIRSF017316:phosphoesterase_C1039.02 type                                                        | RT |  |  |  | 3     | 6.1E-1  | 1.0E0     |  |
| <input type="checkbox"/> | PIR_SUPERFAMILY       | PIRSF017316:Pesterase_C1039                                                                      | RT |  |  |  | 3     | 6.1E-1  | 1.0E0     |  |
| <input type="checkbox"/> | INTERPRO              | <a href="#">5'-Nucleotidase and apyrase</a>                                                      | RT |  |  |  | 3     | 6.2E-1  | 1.0E0     |  |
| <input type="checkbox"/> | INTERPRO              | <a href="#">Predicted phosphoesterase_C1039.02 type</a>                                          | RT |  |  |  | 3     | 6.2E-1  | 1.0E0     |  |
| <input type="checkbox"/> | COG_ONTOLOGY          | <a href="#">Nucleotide transport and metabolism</a>                                              | RT |  |  |  | 5     | 8.2E-1  | 1.0E0     |  |
|                          | Annotation Cluster 26 | Enrichment Score: 0.24                                                                           |    |  |  |  | Count | P_Value | Benjamini |  |
| <input type="checkbox"/> | GOTERM_BP_FAT         | <a href="#">ribosome biogenesis</a>                                                              | RT |  |  |  | 13    | 4.9E-1  | 1.0E0     |  |
| <input type="checkbox"/> | GOTERM_BP_FAT         | <a href="#">ribonucleoprotein complex biogenesis</a>                                             | RT |  |  |  | 13    | 4.9E-1  | 1.0E0     |  |
| <input type="checkbox"/> | GOTERM_BP_FAT         | <a href="#">ncRNA processing</a>                                                                 | RT |  |  |  | 18    | 5.1E-1  | 1.0E0     |  |
| <input type="checkbox"/> | GOTERM_BP_FAT         | <a href="#">rRNA modification</a>                                                                | RT |  |  |  | 3     | 6.1E-1  | 1.0E0     |  |
| <input type="checkbox"/> | GOTERM_BP_FAT         | <a href="#">rRNA metabolic process</a>                                                           | RT |  |  |  | 8     | 7.0E-1  | 1.0E0     |  |
| <input type="checkbox"/> | GOTERM_BP_FAT         | <a href="#">rRNA processing</a>                                                                  | RT |  |  |  | 8     | 7.0E-1  | 1.0E0     |  |
|                          | Annotation Cluster 27 | Enrichment Score: 0.24                                                                           |    |  |  |  | Count | P_Value | Benjamini |  |
| <input type="checkbox"/> | INTERPRO              | <a href="#">EGF-like_type 3</a>                                                                  | RT |  |  |  | 20    | 5.2E-1  | 1.0E0     |  |
| <input type="checkbox"/> | INTERPRO              | <a href="#">EGF-like_laminin</a>                                                                 | RT |  |  |  | 16    | 6.1E-1  | 1.0E0     |  |
| <input type="checkbox"/> | SMART                 | <a href="#">EGF_Lam</a>                                                                          | RT |  |  |  | 16    | 6.1E-1  | 1.0E0     |  |
|                          | Annotation Cluster 28 | Enrichment Score: 0.23                                                                           |    |  |  |  | Count | P_Value | Benjamini |  |
| <input type="checkbox"/> | GOTERM_BP_FAT         | <a href="#">pyridine nucleotide biosynthetic process</a>                                         | RT |  |  |  | 4     | 4.2E-1  | 1.0E0     |  |
| <input type="checkbox"/> | GOTERM_BP_FAT         | <a href="#">pyridine nucleotide metabolic process</a>                                            | RT |  |  |  | 5     | 4.8E-1  | 1.0E0     |  |
| <input type="checkbox"/> | GOTERM_BP_FAT         | <a href="#">oxidoreduction coenzyme metabolic process</a>                                        | RT |  |  |  | 5     | 4.8E-1  | 1.0E0     |  |
| <input type="checkbox"/> | GOTERM_BP_FAT         | <a href="#">coenzyme metabolic process</a>                                                       | RT |  |  |  | 7     | 5.6E-1  | 1.0E0     |  |
| <input type="checkbox"/> | GOTERM_BP_FAT         | <a href="#">cofactor metabolic process</a>                                                       | RT |  |  |  | 8     | 5.9E-1  | 1.0E0     |  |
| <input type="checkbox"/> | GOTERM_BP_FAT         | <a href="#">NAD metabolic process</a>                                                            | RT |  |  |  | 3     | 6.1E-1  | 1.0E0     |  |
| <input type="checkbox"/> | GOTERM_BP_FAT         | <a href="#">NAD biosynthetic process</a>                                                         | RT |  |  |  | 3     | 6.1E-1  | 1.0E0     |  |
| <input type="checkbox"/> | GOTERM_BP_FAT         | <a href="#">nicotinamide nucleotide biosynthetic process</a>                                     | RT |  |  |  | 3     | 6.1E-1  | 1.0E0     |  |
| <input type="checkbox"/> | GOTERM_BP_FAT         | <a href="#">water-soluble vitamin biosynthetic process</a>                                       | RT |  |  |  | 4     | 6.3E-1  | 1.0E0     |  |
| <input type="checkbox"/> | GOTERM_BP_FAT         | <a href="#">vitamin metabolic process</a>                                                        | RT |  |  |  | 4     | 6.3E-1  | 1.0E0     |  |
| <input type="checkbox"/> | GOTERM_BP_FAT         | <a href="#">secondary metabolic process</a>                                                      | RT |  |  |  | 4     | 6.3E-1  | 1.0E0     |  |
| <input type="checkbox"/> | GOTERM_BP_FAT         | <a href="#">water-soluble vitamin metabolic process</a>                                          | RT |  |  |  | 4     | 6.3E-1  | 1.0E0     |  |
| <input type="checkbox"/> | GOTERM_BP_FAT         | <a href="#">nicotinamide metabolic process</a>                                                   | RT |  |  |  | 4     | 6.3E-1  | 1.0E0     |  |
| <input type="checkbox"/> | GOTERM_BP_FAT         | <a href="#">nicotinamide nucleotide metabolic process</a>                                        | RT |  |  |  | 4     | 6.3E-1  | 1.0E0     |  |
| <input type="checkbox"/> | GOTERM_BP_FAT         | <a href="#">alkaloid metabolic process</a>                                                       | RT |  |  |  | 4     | 6.3E-1  | 1.0E0     |  |
| <input type="checkbox"/> | GOTERM_BP_FAT         | <a href="#">cellular amide metabolic process</a>                                                 | RT |  |  |  | 4     | 6.3E-1  | 1.0E0     |  |
| <input type="checkbox"/> | GOTERM_BP_FAT         | <a href="#">vitamin biosynthetic process</a>                                                     | RT |  |  |  | 4     | 6.3E-1  | 1.0E0     |  |

| <input type="checkbox"/> | GOTERM_BP_FAT         | <a href="#">coenzyme biosynthetic process</a>                                      | RT |  |  |  |  | 5     | 6.5E-1  | 1.0EO     |
|--------------------------|-----------------------|------------------------------------------------------------------------------------|----|--|--|--|--|-------|---------|-----------|
| <input type="checkbox"/> | GOTERM_BP_FAT         | <a href="#">cofactor biosynthetic process</a>                                      | RT |  |  |  |  | 6     | 6.7E-1  | 1.0EO     |
|                          | Annotation Cluster 29 | Enrichment Score: 0.22                                                             |    |  |  |  |  | Count | P_Value | Benjamini |
| <input type="checkbox"/> | SP_PIR_KEYWORDS       | <a href="#">transmembrane</a>                                                      | RT |  |  |  |  | 18    | 5.8E-1  | 1.0EO     |
| <input type="checkbox"/> | INTERPRO              | <a href="#">Amino acid transporter, transmembrane</a>                              | RT |  |  |  |  | 7     | 5.9E-1  | 1.0EO     |
| <input type="checkbox"/> | GOTERM_CC_FAT         | <a href="#">integral to membrane</a>                                               | RT |  |  |  |  | 38    | 6.0E-1  | 1.0EO     |
| <input type="checkbox"/> | GOTERM_CC_FAT         | <a href="#">intrinsic to membrane</a>                                              | RT |  |  |  |  | 38    | 6.0E-1  | 1.0EO     |
| <input type="checkbox"/> | SP_PIR_KEYWORDS       | <a href="#">membrane</a>                                                           | RT |  |  |  |  | 16    | 6.3E-1  | 9.9E-1    |
|                          | Annotation Cluster 30 | Enrichment Score: 0.21                                                             |    |  |  |  |  | Count | P_Value | Benjamini |
| <input type="checkbox"/> | INTERPRO              | <a href="#">Protein phosphatase 2C, N-terminal</a>                                 | RT |  |  |  |  | 5     | 5.1E-1  | 1.0EO     |
| <input type="checkbox"/> | INTERPRO              | <a href="#">Protein phosphatase 2C-related</a>                                     | RT |  |  |  |  | 5     | 5.1E-1  | 1.0EO     |
| <input type="checkbox"/> | INTERPRO              | <a href="#">Protein phosphatase 2C</a>                                             | RT |  |  |  |  | 5     | 5.1E-1  | 1.0EO     |
| <input type="checkbox"/> | SMART                 | <a href="#">PP2C_SIG</a>                                                           | RT |  |  |  |  | 5     | 5.1E-1  | 1.0EO     |
| <input type="checkbox"/> | SMART                 | <a href="#">PP2Cc</a>                                                              | RT |  |  |  |  | 5     | 5.1E-1  | 1.0EO     |
| <input type="checkbox"/> | SP_PIR_KEYWORDS       | <a href="#">magnesium</a>                                                          | RT |  |  |  |  | 8     | 5.8E-1  | 1.0EO     |
| <input type="checkbox"/> | GOTERM_CC_FAT         | <a href="#">protein serine/threonine phosphatase complex</a>                       | RT |  |  |  |  | 5     | 6.4E-1  | 1.0EO     |
| <input type="checkbox"/> | GOTERM_MF_FAT         | <a href="#">magnesium ion binding</a>                                              | RT |  |  |  |  | 9     | 7.1E-1  | 1.0EO     |
| <input type="checkbox"/> | SP_PIR_KEYWORDS       | <a href="#">protein phosphatase</a>                                                | RT |  |  |  |  | 3     | 7.8E-1  | 9.9E-1    |
| <input type="checkbox"/> | GOTERM_MF_FAT         | <a href="#">protein serine/threonine phosphatase activity</a>                      | RT |  |  |  |  | 3     | 7.8E-1  | 1.0EO     |
| <input type="checkbox"/> | INTERPRO              | <a href="#">Protein phosphatase 2C, manganese/magnesium aspartate binding site</a> | RT |  |  |  |  | 3     | 8.0E-1  | 1.0EO     |
|                          | Annotation Cluster 31 | Enrichment Score: 0.21                                                             |    |  |  |  |  | Count | P_Value | Benjamini |
| <input type="checkbox"/> | GOTERM_MF_FAT         | <a href="#">lipase activity</a>                                                    | RT |  |  |  |  | 3     | 6.0E-1  | 1.0EO     |
| <input type="checkbox"/> | GOTERM_MF_FAT         | <a href="#">triacylglycerol lipase activity</a>                                    | RT |  |  |  |  | 3     | 6.0E-1  | 1.0EO     |
| <input type="checkbox"/> | INTERPRO              | <a href="#">Lipase, class 3</a>                                                    | RT |  |  |  |  | 3     | 6.2E-1  | 1.0EO     |
| <input type="checkbox"/> | GOTERM_MF_FAT         | <a href="#">carboxylesterase activity</a>                                          | RT |  |  |  |  | 4     | 6.3E-1  | 1.0EO     |
|                          | Annotation Cluster 32 | Enrichment Score: 0.21                                                             |    |  |  |  |  | Count | P_Value | Benjamini |
| <input type="checkbox"/> | SP_PIR_KEYWORDS       | <a href="#">Transcription</a>                                                      | RT |  |  |  |  | 6     | 5.2E-1  | 1.0EO     |
| <input type="checkbox"/> | SP_PIR_KEYWORDS       | <a href="#">dna-directed rna polymerase</a>                                        | RT |  |  |  |  | 9     | 6.0E-1  | 1.0EO     |
| <input type="checkbox"/> | INTERPRO              | <a href="#">DNA-directed RNA polymerase, subunit 2</a>                             | RT |  |  |  |  | 3     | 6.2E-1  | 1.0EO     |
| <input type="checkbox"/> | INTERPRO              | <a href="#">RNA polymerase, beta subunit, conserved site</a>                       | RT |  |  |  |  | 3     | 6.2E-1  | 1.0EO     |
| <input type="checkbox"/> | INTERPRO              | <a href="#">DNA-directed RNA polymerase, subunit 2, domain 6</a>                   | RT |  |  |  |  | 3     | 6.2E-1  | 1.0EO     |
| <input type="checkbox"/> | INTERPRO              | <a href="#">RNA polymerase Rpb2, domain 3</a>                                      | RT |  |  |  |  | 3     | 6.2E-1  | 1.0EO     |
| <input type="checkbox"/> | INTERPRO              | <a href="#">RNA polymerase, beta subunit, protrusion</a>                           | RT |  |  |  |  | 3     | 6.2E-1  | 1.0EO     |
| <input type="checkbox"/> | INTERPRO              | <a href="#">RNA polymerase Rpb2, domain 7</a>                                      | RT |  |  |  |  | 3     | 6.2E-1  | 1.0EO     |
| <input type="checkbox"/> | GOTERM_MF_FAT         | <a href="#">ribonucleoside binding</a>                                             | RT |  |  |  |  | 3     | 7.8E-1  | 1.0EO     |
|                          | Annotation Cluster 33 | Enrichment Score: 0.2                                                              |    |  |  |  |  | Count | P_Value | Benjamini |
| <input type="checkbox"/> | GOTERM_MF_FAT         | <a href="#">enzyme activator activity</a>                                          | RT |  |  |  |  | 7     | 4.0E-1  | 1.0EO     |
| <input type="checkbox"/> | GOTERM_BP_FAT         | <a href="#">regulation of small GTPase mediated signal transduction</a>            | RT |  |  |  |  | 7     | 4.1E-1  | 1.0EO     |
| <input type="checkbox"/> | GOTERM_BP_FAT         | <a href="#">regulation of Ras protein signal transduction</a>                      | RT |  |  |  |  | 7     | 4.1E-1  | 1.0EO     |
| <input type="checkbox"/> | GOTERM_MF_FAT         | <a href="#">nucleoside-triphosphatase regulator activity</a>                       | RT |  |  |  |  | 9     | 4.8E-1  | 1.0EO     |
| <input type="checkbox"/> | GOTERM_BP_FAT         | <a href="#">regulation of ARF protein signal transduction</a>                      | RT |  |  |  |  | 4     | 6.3E-1  | 1.0EO     |
| <input type="checkbox"/> | GOTERM_MF_FAT         | <a href="#">GTPase activator activity</a>                                          | RT |  |  |  |  | 5     | 6.5E-1  | 1.0EO     |
| <input type="checkbox"/> | GOTERM_BP_FAT         | <a href="#">regulation of Ras GTPase activity</a>                                  | RT |  |  |  |  | 5     | 6.5E-1  | 1.0EO     |
| <input type="checkbox"/> | GOTERM_MF_FAT         | <a href="#">GTPase regulator activity</a>                                          | RT |  |  |  |  | 7     | 6.8E-1  | 1.0EO     |
| <input type="checkbox"/> | GOTERM_MF_FAT         | <a href="#">small GTPase regulator activity</a>                                    | RT |  |  |  |  | 7     | 6.8E-1  | 1.0EO     |
| <input type="checkbox"/> | GOTERM_BP_FAT         | <a href="#">regulation of GTPase activity</a>                                      | RT |  |  |  |  | 5     | 7.8E-1  | 1.0EO     |
| <input type="checkbox"/> | GOTERM_BP_FAT         | <a href="#">regulation of hydrolase activity</a>                                   | RT |  |  |  |  | 5     | 7.8E-1  | 1.0EO     |
| <input type="checkbox"/> | GOTERM_MF_FAT         | <a href="#">Rab GTPase activator activity</a>                                      | RT |  |  |  |  | 3     | 7.8E-1  | 1.0EO     |
| <input type="checkbox"/> | GOTERM_MF_FAT         | <a href="#">Ras GTPase activator activity</a>                                      | RT |  |  |  |  | 3     | 7.8E-1  | 1.0EO     |
| <input type="checkbox"/> | GOTERM_BP_FAT         | <a href="#">regulation of Rab protein signal transduction</a>                      | RT |  |  |  |  | 3     | 7.9E-1  | 1.0EO     |
| <input type="checkbox"/> | GOTERM_BP_FAT         | <a href="#">regulation of Rab GTPase activity</a>                                  | RT |  |  |  |  | 3     | 7.9E-1  | 1.0EO     |
|                          | Annotation Cluster 34 | Enrichment Score: 0.19                                                             |    |  |  |  |  | Count | P_Value | Benjamini |
| <input type="checkbox"/> | GOTERM_BP_FAT         | <a href="#">RNA processing</a>                                                     | RT |  |  |  |  | 28    | 4.7E-1  | 1.0EO     |
| <input type="checkbox"/> | GOTERM_BP_FAT         | <a href="#">ncRNA processing</a>                                                   | RT |  |  |  |  | 18    | 5.1E-1  | 1.0EO     |
| <input type="checkbox"/> | GOTERM_BP_FAT         | <a href="#">tRNA processing</a>                                                    | RT |  |  |  |  | 10    | 7.3E-1  | 1.0EO     |
| <input type="checkbox"/> | GOTERM_BP_FAT         | <a href="#">ncRNA metabolic process</a>                                            | RT |  |  |  |  | 29    | 7.3E-1  | 1.0EO     |

| <input type="checkbox"/> | <b>GOTERM_BP_FAT</b>   | <a href="#">tRNA metabolic process</a>                               | <b>RT</b> |  |  | 21    | 8.6E-1  | 1.0EO     |  |  |
|--------------------------|------------------------|----------------------------------------------------------------------|-----------|--|--|-------|---------|-----------|--|--|
|                          | Annotation Cluster 35  | Enrichment Score: 0.19                                               |           |  |  | Count | P_Value | Benjamini |  |  |
| <input type="checkbox"/> | <b>INTERPRO</b>        | <a href="#">RNA recognition motif_RNP-1</a>                          | <b>RT</b> |  |  | 9     | 6.4E-1  | 1.0EO     |  |  |
| <input type="checkbox"/> | <b>SMART</b>           | <a href="#">RRM</a>                                                  | <b>RT</b> |  |  | 9     | 6.5E-1  | 1.0EO     |  |  |
| <input type="checkbox"/> | <b>INTERPRO</b>        | <a href="#">Nucleotide-binding_alpha-beta_plait</a>                  | <b>RT</b> |  |  | 10    | 6.7E-1  | 1.0EO     |  |  |
|                          | Annotation Cluster 36  | Enrichment Score: 0.18                                               |           |  |  | Count | P_Value | Benjamini |  |  |
| <input type="checkbox"/> | <b>GOTERM_MF_FAT</b>   | <a href="#">antiporter activity</a>                                  | <b>RT</b> |  |  | 5     | 4.8E-1  | 1.0EO     |  |  |
| <input type="checkbox"/> | <b>GOTERM_MF_FAT</b>   | <a href="#">drug transporter activity</a>                            | <b>RT</b> |  |  | 4     | 6.3E-1  | 1.0EO     |  |  |
| <input type="checkbox"/> | <b>GOTERM_BP_FAT</b>   | <a href="#">drug transport</a>                                       | <b>RT</b> |  |  | 4     | 6.3E-1  | 1.0EO     |  |  |
| <input type="checkbox"/> | <b>GOTERM_BP_FAT</b>   | <a href="#">response to drug</a>                                     | <b>RT</b> |  |  | 4     | 6.3E-1  | 1.0EO     |  |  |
| <input type="checkbox"/> | <b>GOTERM_BP_FAT</b>   | <a href="#">multidrug transport</a>                                  | <b>RT</b> |  |  | 4     | 6.3E-1  | 1.0EO     |  |  |
| <input type="checkbox"/> | <b>INTERPRO</b>        | <a href="#">Multi antimicrobial extrusion protein MatE</a>           | <b>RT</b> |  |  | 4     | 6.5E-1  | 1.0EO     |  |  |
| <input type="checkbox"/> | <b>INTERPRO</b>        | <a href="#">Na+ driven multidrug efflux pump</a>                     | <b>RT</b> |  |  | 3     | 8.0E-1  | 1.0EO     |  |  |
| <input type="checkbox"/> | <b>COG_ONTOLOGY</b>    | <a href="#">Defense mechanisms</a>                                   | <b>RT</b> |  |  | 12    | 8.7E-1  | 1.0EO     |  |  |
|                          | Annotation Cluster 37  | Enrichment Score: 0.18                                               |           |  |  | Count | P_Value | Benjamini |  |  |
| <input type="checkbox"/> | <b>GOTERM_BP_FAT</b>   | <a href="#">hexose catabolic process</a>                             | <b>RT</b> |  |  | 9     | 6.1E-1  | 1.0EO     |  |  |
| <input type="checkbox"/> | <b>GOTERM_BP_FAT</b>   | <a href="#">alcohol catabolic process</a>                            | <b>RT</b> |  |  | 9     | 6.1E-1  | 1.0EO     |  |  |
| <input type="checkbox"/> | <b>GOTERM_BP_FAT</b>   | <a href="#">monosaccharide catabolic process</a>                     | <b>RT</b> |  |  | 9     | 6.1E-1  | 1.0EO     |  |  |
| <input type="checkbox"/> | <b>GOTERM_BP_FAT</b>   | <a href="#">cellular carbohydrate catabolic process</a>              | <b>RT</b> |  |  | 9     | 6.1E-1  | 1.0EO     |  |  |
| <input type="checkbox"/> | <b>GOTERM_BP_FAT</b>   | <a href="#">glucose catabolic process</a>                            | <b>RT</b> |  |  | 9     | 6.1E-1  | 1.0EO     |  |  |
| <input type="checkbox"/> | <b>GOTERM_BP_FAT</b>   | <a href="#">carbohydrate catabolic process</a>                       | <b>RT</b> |  |  | 9     | 6.1E-1  | 1.0EO     |  |  |
| <input type="checkbox"/> | <b>GOTERM_BP_FAT</b>   | <a href="#">hexose metabolic process</a>                             | <b>RT</b> |  |  | 12    | 6.6E-1  | 1.0EO     |  |  |
| <input type="checkbox"/> | <b>GOTERM_BP_FAT</b>   | <a href="#">glucose metabolic process</a>                            | <b>RT</b> |  |  | 12    | 6.6E-1  | 1.0EO     |  |  |
| <input type="checkbox"/> | <b>GOTERM_BP_FAT</b>   | <a href="#">glycolysis</a>                                           | <b>RT</b> |  |  | 7     | 6.9E-1  | 1.0EO     |  |  |
| <input type="checkbox"/> | <b>GOTERM_BP_FAT</b>   | <a href="#">generation of precursor metabolites and energy</a>       | <b>RT</b> |  |  | 15    | 7.1E-1  | 1.0EO     |  |  |
| <input type="checkbox"/> | <b>SP_PIR_KEYWORDS</b> | <a href="#">glycolysis</a>                                           | <b>RT</b> |  |  | 4     | 7.7E-1  | 9.9E-1    |  |  |
| <input type="checkbox"/> | <b>GOTERM_BP_FAT</b>   | <a href="#">monosaccharide metabolic process</a>                     | <b>RT</b> |  |  | 12    | 8.7E-1  | 1.0EO     |  |  |
|                          | Annotation Cluster 38  | Enrichment Score: 0.17                                               |           |  |  | Count | P_Value | Benjamini |  |  |
| <input type="checkbox"/> | <b>GOTERM_BP_FAT</b>   | <a href="#">chromatin organization</a>                               | <b>RT</b> |  |  | 11    | 3.1E-1  | 1.0EO     |  |  |
| <input type="checkbox"/> | <b>GOTERM_BP_FAT</b>   | <a href="#">chromosome organization</a>                              | <b>RT</b> |  |  | 13    | 3.8E-1  | 1.0EO     |  |  |
| <input type="checkbox"/> | <b>GOTERM_BP_FAT</b>   | <a href="#">chromatin assembly or disassembly</a>                    | <b>RT</b> |  |  | 9     | 4.9E-1  | 1.0EO     |  |  |
| <input type="checkbox"/> | <b>GOTERM_CC_FAT</b>   | <a href="#">chromatin</a>                                            | <b>RT</b> |  |  | 8     | 5.8E-1  | 1.0EO     |  |  |
| <input type="checkbox"/> | <b>PIR_SUPERFAMILY</b> | PIRSF002052:histone H4                                               | <b>RT</b> |  |  | 3     | 6.1E-1  | 1.0EO     |  |  |
| <input type="checkbox"/> | <b>INTERPRO</b>        | <a href="#">Histone H4</a>                                           | <b>RT</b> |  |  | 3     | 6.2E-1  | 1.0EO     |  |  |
| <input type="checkbox"/> | <b>SMART</b>           | <a href="#">H4</a>                                                   | <b>RT</b> |  |  | 3     | 6.2E-1  | 1.0EO     |  |  |
| <input type="checkbox"/> | <b>INTERPRO</b>        | <a href="#">Histone-fold</a>                                         | <b>RT</b> |  |  | 9     | 6.4E-1  | 1.0EO     |  |  |
| <input type="checkbox"/> | <b>GOTERM_CC_FAT</b>   | <a href="#">nucleosome</a>                                           | <b>RT</b> |  |  | 7     | 6.8E-1  | 1.0EO     |  |  |
| <input type="checkbox"/> | <b>SP_PIR_KEYWORDS</b> | <a href="#">chromosomal protein</a>                                  | <b>RT</b> |  |  | 7     | 6.8E-1  | 9.9E-1    |  |  |
| <input type="checkbox"/> | <b>GOTERM_BP_FAT</b>   | <a href="#">protein-DNA complex assembly</a>                         | <b>RT</b> |  |  | 7     | 6.9E-1  | 1.0EO     |  |  |
| <input type="checkbox"/> | <b>GOTERM_BP_FAT</b>   | <a href="#">chromatin assembly</a>                                   | <b>RT</b> |  |  | 7     | 6.9E-1  | 1.0EO     |  |  |
| <input type="checkbox"/> | <b>GOTERM_BP_FAT</b>   | <a href="#">DNA packaging</a>                                        | <b>RT</b> |  |  | 7     | 6.9E-1  | 1.0EO     |  |  |
| <input type="checkbox"/> | <b>GOTERM_BP_FAT</b>   | <a href="#">nucleosome organization</a>                              | <b>RT</b> |  |  | 7     | 6.9E-1  | 1.0EO     |  |  |
| <input type="checkbox"/> | <b>GOTERM_BP_FAT</b>   | <a href="#">nucleosome assembly</a>                                  | <b>RT</b> |  |  | 7     | 6.9E-1  | 1.0EO     |  |  |
| <input type="checkbox"/> | <b>GOTERM_CC_FAT</b>   | <a href="#">protein-DNA complex</a>                                  | <b>RT</b> |  |  | 8     | 6.9E-1  | 1.0EO     |  |  |
| <input type="checkbox"/> | <b>GOTERM_BP_FAT</b>   | <a href="#">cellular macromolecular complex assembly</a>             | <b>RT</b> |  |  | 14    | 6.9E-1  | 1.0EO     |  |  |
| <input type="checkbox"/> | <b>GOTERM_BP_FAT</b>   | <a href="#">macromolecular complex assembly</a>                      | <b>RT</b> |  |  | 15    | 7.1E-1  | 1.0EO     |  |  |
| <input type="checkbox"/> | <b>INTERPRO</b>        | <a href="#">Histone core</a>                                         | <b>RT</b> |  |  | 7     | 7.1E-1  | 1.0EO     |  |  |
| <input type="checkbox"/> | <b>GOTERM_BP_FAT</b>   | <a href="#">cellular macromolecular complex subunit organization</a> | <b>RT</b> |  |  | 14    | 7.7E-1  | 1.0EO     |  |  |
| <input type="checkbox"/> | <b>GOTERM_CC_FAT</b>   | <a href="#">chromosome</a>                                           | <b>RT</b> |  |  | 15    | 7.7E-1  | 1.0EO     |  |  |
| <input type="checkbox"/> | <b>GOTERM_BP_FAT</b>   | <a href="#">macromolecular complex subunit organization</a>          | <b>RT</b> |  |  | 15    | 7.7E-1  | 1.0EO     |  |  |
| <input type="checkbox"/> | <b>INTERPRO</b>        | <a href="#">Histone H3</a>                                           | <b>RT</b> |  |  | 3     | 8.0E-1  | 1.0EO     |  |  |
| <input type="checkbox"/> | <b>SMART</b>           | <a href="#">H3</a>                                                   | <b>RT</b> |  |  | 3     | 8.0E-1  | 1.0EO     |  |  |
| <input type="checkbox"/> | <b>GOTERM_CC_FAT</b>   | <a href="#">chromosomal part</a>                                     | <b>RT</b> |  |  | 9     | 8.6E-1  | 1.0EO     |  |  |
| <input type="checkbox"/> | <b>SP_PIR_KEYWORDS</b> | <a href="#">nucleosome core</a>                                      | <b>RT</b> |  |  | 4     | 8.7E-1  | 9.9E-1    |  |  |
| <input type="checkbox"/> | <b>SP_PIR_KEYWORDS</b> | <a href="#">dna-binding</a>                                          | <b>RT</b> |  |  | 18    | 8.8E-1  | 9.9E-1    |  |  |
| <input type="checkbox"/> | <b>SP_PIR_KEYWORDS</b> | <a href="#">nucleus</a>                                              | <b>RT</b> |  |  | 17    | 9.1E-1  | 9.9E-1    |  |  |
|                          | Annotation Cluster 39  | Enrichment Score: 0.17                                               |           |  |  | Count | P_Value | Benjamini |  |  |

| <input type="checkbox"/> | Category        | Term                                                                                                                                         | RT                     | Count | P-Value | Benjamini |           |
|--------------------------|-----------------|----------------------------------------------------------------------------------------------------------------------------------------------|------------------------|-------|---------|-----------|-----------|
| <input type="checkbox"/> | INTERPRO        | <a href="#">EF-Hand type</a>                                                                                                                 | RT                     | 12    | 5.0E-1  | 1.0E0     |           |
| <input type="checkbox"/> | INTERPRO        | <a href="#">EF-HAND_2</a>                                                                                                                    | RT                     | 11    | 5.8E-1  | 1.0E0     |           |
| <input type="checkbox"/> | COG_ONTOLOGY    | <a href="#">Signal transduction mechanisms / Cytoskeleton / Cell division and chromosome partitioning / General function prediction only</a> | RT                     | 5     | 7.0E-1  | 1.0E0     |           |
| <input type="checkbox"/> | INTERPRO        | <a href="#">EF-HAND_1</a>                                                                                                                    | RT                     | 12    | 7.0E-1  | 1.0E0     |           |
| <input type="checkbox"/> | SP_PIR_KEYWORDS | <a href="#">calcium</a>                                                                                                                      | RT                     | 9     | 7.1E-1  | 9.9E-1    |           |
| <input type="checkbox"/> | INTERPRO        | <a href="#">Calcium-binding EF-hand</a>                                                                                                      | RT                     | 7     | 7.1E-1  | 1.0E0     |           |
| <input type="checkbox"/> | SMART           | <a href="#">EFh</a>                                                                                                                          | RT                     | 7     | 7.2E-1  | 1.0E0     |           |
| <input type="checkbox"/> | INTERPRO        | <a href="#">EF hand</a>                                                                                                                      | RT                     | 6     | 8.8E-1  | 1.0E0     |           |
|                          |                 | Annotation Cluster 40                                                                                                                        | Enrichment Score: 0.17 |       | Count   | P-Value   | Benjamini |
| <input type="checkbox"/> | SP_PIR_KEYWORDS | <a href="#">protein biosynthesis</a>                                                                                                         | RT                     | 7     | 5.5E-1  | 1.0E0     |           |
| <input type="checkbox"/> | PIR_SUPERFAMILY | PIRSF001525:lysine-tRNA ligase                                                                                                               | RT                     | 3     | 6.1E-1  | 1.0E0     |           |
| <input type="checkbox"/> | INTERPRO        | <a href="#">Aminoacyl-tRNA synthetase, class II (D, K and N)</a>                                                                             | RT                     | 3     | 6.2E-1  | 1.0E0     |           |
| <input type="checkbox"/> | INTERPRO        | <a href="#">Aminoacyl-tRNA synthetase, class II (D, K and N)-like</a>                                                                        | RT                     | 3     | 6.2E-1  | 1.0E0     |           |
| <input type="checkbox"/> | INTERPRO        | <a href="#">Nucleic acid binding, OB-fold, tRNA/helicase-type</a>                                                                            | RT                     | 3     | 8.0E-1  | 1.0E0     |           |
| <input type="checkbox"/> | INTERPRO        | <a href="#">Aminoacyl-tRNA synthetase, class II, conserved region</a>                                                                        | RT                     | 4     | 9.7E-1  | 1.0E0     |           |
|                          |                 | Annotation Cluster 41                                                                                                                        | Enrichment Score: 0.17 |       | Count   | P-Value   | Benjamini |
| <input type="checkbox"/> | SP_PIR_KEYWORDS | <a href="#">dipeptidase</a>                                                                                                                  | RT                     | 3     | 6.0E-1  | 9.9E-1    |           |
| <input type="checkbox"/> | GOTERM_MF_FAT   | <a href="#">dipeptidase activity</a>                                                                                                         | RT                     | 3     | 6.0E-1  | 1.0E0     |           |
| <input type="checkbox"/> | GOTERM_MF_FAT   | <a href="#">exopeptidase activity</a>                                                                                                        | RT                     | 7     | 6.8E-1  | 1.0E0     |           |
| <input type="checkbox"/> | GOTERM_MF_FAT   | <a href="#">metallopeptidase activity</a>                                                                                                    | RT                     | 8     | 6.9E-1  | 1.0E0     |           |
| <input type="checkbox"/> | GOTERM_MF_FAT   | <a href="#">metalloexopeptidase activity</a>                                                                                                 | RT                     | 4     | 8.7E-1  | 1.0E0     |           |
|                          |                 | Annotation Cluster 42                                                                                                                        | Enrichment Score: 0.16 |       | Count   | P-Value   | Benjamini |
| <input type="checkbox"/> | GOTERM_MF_FAT   | <a href="#">cation binding</a>                                                                                                               | RT                     | 149   | 4.2E-1  | 1.0E0     |           |
| <input type="checkbox"/> | GOTERM_MF_FAT   | <a href="#">ion binding</a>                                                                                                                  | RT                     | 149   | 4.2E-1  | 1.0E0     |           |
| <input type="checkbox"/> | GOTERM_MF_FAT   | <a href="#">metal ion binding</a>                                                                                                            | RT                     | 146   | 4.9E-1  | 1.0E0     |           |
| <input type="checkbox"/> | INTERPRO        | <a href="#">Zinc finger, C3HC4 RING-type</a>                                                                                                 | RT                     | 21    | 6.2E-1  | 1.0E0     |           |
| <input type="checkbox"/> | GOTERM_MF_FAT   | <a href="#">transition metal ion binding</a>                                                                                                 | RT                     | 103   | 7.7E-1  | 1.0E0     |           |
| <input type="checkbox"/> | SP_PIR_KEYWORDS | <a href="#">zinc-finger</a>                                                                                                                  | RT                     | 33    | 8.0E-1  | 9.9E-1    |           |
| <input type="checkbox"/> | INTERPRO        | <a href="#">Zinc finger, RING-type</a>                                                                                                       | RT                     | 37    | 8.1E-1  | 1.0E0     |           |
| <input type="checkbox"/> | SMART           | <a href="#">RING</a>                                                                                                                         | RT                     | 37    | 8.2E-1  | 1.0E0     |           |
| <input type="checkbox"/> | GOTERM_MF_FAT   | <a href="#">zinc ion binding</a>                                                                                                             | RT                     | 80    | 9.0E-1  | 1.0E0     |           |
| <input type="checkbox"/> | SP_PIR_KEYWORDS | <a href="#">zinc</a>                                                                                                                         | RT                     | 42    | 9.5E-1  | 1.0E0     |           |
| <input type="checkbox"/> | SP_PIR_KEYWORDS | <a href="#">metal-binding</a>                                                                                                                | RT                     | 50    | 9.6E-1  | 1.0E0     |           |
|                          |                 | Annotation Cluster 43                                                                                                                        | Enrichment Score: 0.16 |       | Count   | P-Value   | Benjamini |
| <input type="checkbox"/> | GOTERM_MF_FAT   | <a href="#">fatty-acid ligase activity</a>                                                                                                   | RT                     | 4     | 6.3E-1  | 1.0E0     |           |
| <input type="checkbox"/> | GOTERM_MF_FAT   | <a href="#">long-chain-fatty-acid-CoA ligase activity</a>                                                                                    | RT                     | 4     | 6.3E-1  | 1.0E0     |           |
| <input type="checkbox"/> | GOTERM_MF_FAT   | <a href="#">ligase activity, forming carbon-sulfur bonds</a>                                                                                 | RT                     | 4     | 6.3E-1  | 1.0E0     |           |
| <input type="checkbox"/> | COG_ONTOLOGY    | <a href="#">Lipid metabolism</a>                                                                                                             | RT                     | 8     | 7.5E-1  | 1.0E0     |           |
| <input type="checkbox"/> | INTERPRO        | <a href="#">AMP-dependent synthetase and ligase</a>                                                                                          | RT                     | 4     | 8.9E-1  | 1.0E0     |           |
|                          |                 | Annotation Cluster 44                                                                                                                        | Enrichment Score: 0.14 |       | Count   | P-Value   | Benjamini |
| <input type="checkbox"/> | SP_PIR_KEYWORDS | <a href="#">heme</a>                                                                                                                         | RT                     | 4     | 6.3E-1  | 9.9E-1    |           |
| <input type="checkbox"/> | GOTERM_MF_FAT   | <a href="#">heme binding</a>                                                                                                                 | RT                     | 5     | 6.5E-1  | 1.0E0     |           |
| <input type="checkbox"/> | GOTERM_MF_FAT   | <a href="#">tetrapyrrole binding</a>                                                                                                         | RT                     | 5     | 6.5E-1  | 1.0E0     |           |
| <input type="checkbox"/> | INTERPRO        | <a href="#">Cytochrome b5, heme-binding site</a>                                                                                             | RT                     | 3     | 8.0E-1  | 1.0E0     |           |
| <input type="checkbox"/> | INTERPRO        | <a href="#">Cytochrome b5</a>                                                                                                                | RT                     | 3     | 9.0E-1  | 1.0E0     |           |
|                          |                 | Annotation Cluster 45                                                                                                                        | Enrichment Score: 0.14 |       | Count   | P-Value   | Benjamini |
| <input type="checkbox"/> | INTERPRO        | <a href="#">Zinc finger, C2H2-like</a>                                                                                                       | RT                     | 11    | 6.9E-1  | 1.0E0     |           |
| <input type="checkbox"/> | SMART           | <a href="#">ZnF_C2H2</a>                                                                                                                     | RT                     | 11    | 6.9E-1  | 1.0E0     |           |
| <input type="checkbox"/> | INTERPRO        | <a href="#">Zinc finger, C2H2-type</a>                                                                                                       | RT                     | 10    | 8.3E-1  | 1.0E0     |           |
|                          |                 | Annotation Cluster 46                                                                                                                        | Enrichment Score: 0.13 |       | Count   | P-Value   | Benjamini |
| <input type="checkbox"/> | GOTERM_MF_FAT   | <a href="#">acetyltransferase activity</a>                                                                                                   | RT                     | 7     | 5.5E-1  | 1.0E0     |           |
| <input type="checkbox"/> | GOTERM_MF_FAT   | <a href="#">N-acetyltransferase activity</a>                                                                                                 | RT                     | 6     | 6.6E-1  | 1.0E0     |           |
| <input type="checkbox"/> | INTERPRO        | <a href="#">GCN5-related N-acetyltransferase</a>                                                                                             | RT                     | 6     | 7.0E-1  | 1.0E0     |           |
| <input type="checkbox"/> | GOTERM_MF_FAT   | <a href="#">N-acyltransferase activity</a>                                                                                                   | RT                     | 6     | 7.8E-1  | 1.0E0     |           |
| <input type="checkbox"/> | SP_PIR_KEYWORDS | <a href="#">Acyltransferase</a>                                                                                                              | RT                     | 6     | 8.6E-1  | 1.0E0     |           |
| <input type="checkbox"/> | INTERPRO        | <a href="#">Acyl-CoA N-acyltransferase</a>                                                                                                   | RT                     | 5     | 9.3E-1  | 1.0E0     |           |

| Annotation Cluster 47    |                 | Enrichment Score: 0.13                                                     |    |  |  | Count | P_Value | Benjamini |
|--------------------------|-----------------|----------------------------------------------------------------------------|----|--|--|-------|---------|-----------|
| <input type="checkbox"/> | INTERPRO        | <a href="#">Ubiquitin-conjugating enzyme, E2</a>                           | RT |  |  | 9     | 3.9E-1  | 1.0E0     |
| <input type="checkbox"/> | INTERPRO        | <a href="#">Ubiquitin-conjugating enzyme/RWD-like</a>                      | RT |  |  | 9     | 3.9E-1  | 1.0E0     |
| <input type="checkbox"/> | SMART           | <a href="#">UBCc</a>                                                       | RT |  |  | 9     | 3.9E-1  | 1.0E0     |
| <input type="checkbox"/> | SP_PIR_KEYWORDS | <a href="#">ligase</a>                                                     | RT |  |  | 33    | 4.7E-1  | 1.0E0     |
| <input type="checkbox"/> | GOTERM_MF_FAT   | <a href="#">acid-amino acid ligase activity</a>                            | RT |  |  | 17    | 4.8E-1  | 1.0E0     |
| <input type="checkbox"/> | GOTERM_MF_FAT   | <a href="#">small conjugating protein ligase activity</a>                  | RT |  |  | 9     | 4.8E-1  | 1.0E0     |
| <input type="checkbox"/> | GOTERM_MF_FAT   | <a href="#">ligase activity, forming carbon-nitrogen bonds</a>             | RT |  |  | 19    | 6.0E-1  | 1.0E0     |
| <input type="checkbox"/> | SP_PIR_KEYWORDS | <a href="#">ubl conjugation pathway</a>                                    | RT |  |  | 8     | 6.9E-1  | 9.9E-1    |
| <input type="checkbox"/> | GOTERM_CC_FAT   | <a href="#">proteasome complex</a>                                         | RT |  |  | 12    | 7.4E-1  | 1.0E0     |
| <input type="checkbox"/> | GOTERM_CC_FAT   | <a href="#">cytosol</a>                                                    | RT |  |  | 16    | 7.8E-1  | 1.0E0     |
| <input type="checkbox"/> | PIR_SUPERFAMILY | PIRSF001567: ubiquitin-protein ligase E2                                   | RT |  |  | 4     | 7.8E-1  | 1.0E0     |
| <input type="checkbox"/> | KEGG_PATHWAY    | <a href="#">Proteasome</a>                                                 | RT |  |  | 15    | 8.0E-1  | 1.0E0     |
| <input type="checkbox"/> | SP_PIR_KEYWORDS | <a href="#">proteasome</a>                                                 | RT |  |  | 11    | 8.0E-1  | 9.9E-1    |
| <input type="checkbox"/> | GOTERM_BP_FAT   | <a href="#">macromolecule catabolic process</a>                            | RT |  |  | 21    | 8.2E-1  | 1.0E0     |
| <input type="checkbox"/> | GOTERM_BP_FAT   | <a href="#">modification-dependent protein catabolic process</a>           | RT |  |  | 14    | 8.3E-1  | 1.0E0     |
| <input type="checkbox"/> | GOTERM_BP_FAT   | <a href="#">modification-dependent macromolecule catabolic process</a>     | RT |  |  | 14    | 8.3E-1  | 1.0E0     |
| <input type="checkbox"/> | GOTERM_BP_FAT   | <a href="#">cellular macromolecule catabolic process</a>                   | RT |  |  | 18    | 8.5E-1  | 1.0E0     |
| <input type="checkbox"/> | GOTERM_BP_FAT   | <a href="#">protein catabolic process</a>                                  | RT |  |  | 20    | 8.6E-1  | 1.0E0     |
| <input type="checkbox"/> | INTERPRO        | <a href="#">Proteasome, alpha and beta subunits</a>                        | RT |  |  | 7     | 8.8E-1  | 1.0E0     |
| <input type="checkbox"/> | GOTERM_BP_FAT   | <a href="#">proteolysis involved in cellular protein catabolic process</a> | RT |  |  | 17    | 8.8E-1  | 1.0E0     |
| <input type="checkbox"/> | GOTERM_BP_FAT   | <a href="#">cellular protein catabolic process</a>                         | RT |  |  | 17    | 8.8E-1  | 1.0E0     |
| <input type="checkbox"/> | INTERPRO        | <a href="#">Proteasome, alpha-subunit, conserved site</a>                  | RT |  |  | 4     | 8.9E-1  | 1.0E0     |
| <input type="checkbox"/> | GOTERM_MF_FAT   | <a href="#">ubiquitin-protein ligase activity</a>                          | RT |  |  | 3     | 8.9E-1  | 1.0E0     |
| <input type="checkbox"/> | GOTERM_MF_FAT   | <a href="#">threonine-type peptidase activity</a>                          | RT |  |  | 7     | 9.1E-1  | 1.0E0     |
| <input type="checkbox"/> | GOTERM_MF_FAT   | <a href="#">threonine-type endopeptidase activity</a>                      | RT |  |  | 7     | 9.1E-1  | 1.0E0     |
| <input type="checkbox"/> | GOTERM_CC_FAT   | <a href="#">proteasome core complex</a>                                    | RT |  |  | 7     | 9.1E-1  | 1.0E0     |
| <input type="checkbox"/> | INTERPRO        | <a href="#">Proteasome, subunit alpha/beta</a>                             | RT |  |  | 7     | 9.2E-1  | 1.0E0     |
| <input type="checkbox"/> | GOTERM_BP_FAT   | <a href="#">proteolysis</a>                                                | RT |  |  | 45    | 9.3E-1  | 1.0E0     |
| <input type="checkbox"/> | SP_PIR_KEYWORDS | <a href="#">threonine protease</a>                                         | RT |  |  | 3     | 9.4E-1  | 1.0E0     |
| <input type="checkbox"/> | PIR_SUPERFAMILY | PIRSF001212: multicatalytic endopeptidase complex chain C9                 | RT |  |  | 3     | 9.5E-1  | 1.0E0     |
| <input type="checkbox"/> | GOTERM_BP_FAT   | <a href="#">ubiquitin-dependent protein catabolic process</a>              | RT |  |  | 6     | 9.7E-1  | 1.0E0     |
| Annotation Cluster 48    |                 | Enrichment Score: 0.13                                                     |    |  |  | Count | P_Value | Benjamini |
| <input type="checkbox"/> | INTERPRO        | <a href="#">von Willebrand factor, type A</a>                              | RT |  |  | 5     | 6.8E-1  | 1.0E0     |
| <input type="checkbox"/> | SMART           | <a href="#">VWA</a>                                                        | RT |  |  | 5     | 6.8E-1  | 1.0E0     |
| <input type="checkbox"/> | INTERPRO        | <a href="#">Copine</a>                                                     | RT |  |  | 3     | 9.0E-1  | 1.0E0     |
| Annotation Cluster 49    |                 | Enrichment Score: 0.13                                                     |    |  |  | Count | P_Value | Benjamini |
| <input type="checkbox"/> | GOTERM_BP_FAT   | <a href="#">cell redox homeostasis</a>                                     | RT |  |  | 11    | 6.5E-1  | 1.0E0     |
| <input type="checkbox"/> | GOTERM_BP_FAT   | <a href="#">homeostatic process</a>                                        | RT |  |  | 12    | 6.6E-1  | 1.0E0     |
| <input type="checkbox"/> | INTERPRO        | <a href="#">Thioredoxin fold</a>                                           | RT |  |  | 13    | 7.2E-1  | 1.0E0     |
| <input type="checkbox"/> | GOTERM_BP_FAT   | <a href="#">cellular homeostasis</a>                                       | RT |  |  | 11    | 7.4E-1  | 1.0E0     |
| <input type="checkbox"/> | INTERPRO        | <a href="#">Thioredoxin-like</a>                                           | RT |  |  | 7     | 8.8E-1  | 1.0E0     |
| <input type="checkbox"/> | INTERPRO        | <a href="#">Thioredoxin, core</a>                                          | RT |  |  | 4     | 8.9E-1  | 1.0E0     |
| Annotation Cluster 50    |                 | Enrichment Score: 0.12                                                     |    |  |  | Count | P_Value | Benjamini |
| <input type="checkbox"/> | GOTERM_MF_FAT   | <a href="#">electron carrier activity</a>                                  | RT |  |  | 14    | 6.0E-1  | 1.0E0     |
| <input type="checkbox"/> | GOTERM_MF_FAT   | <a href="#">iron-sulfur cluster binding</a>                                | RT |  |  | 12    | 6.6E-1  | 1.0E0     |
| <input type="checkbox"/> | GOTERM_MF_FAT   | <a href="#">metal cluster binding</a>                                      | RT |  |  | 12    | 6.6E-1  | 1.0E0     |
| <input type="checkbox"/> | GOTERM_MF_FAT   | <a href="#">4 iron, 4 sulfur cluster binding</a>                           | RT |  |  | 5     | 7.7E-1  | 1.0E0     |
| <input type="checkbox"/> | INTERPRO        | <a href="#">4Fe-4S ferredoxin, iron-sulphur binding domain</a>             | RT |  |  | 5     | 8.8E-1  | 1.0E0     |
| <input type="checkbox"/> | INTERPRO        | <a href="#">4Fe-4S ferredoxin, iron-sulphur binding, subgroup</a>          | RT |  |  | 5     | 8.8E-1  | 1.0E0     |
| <input type="checkbox"/> | INTERPRO        | <a href="#">4Fe-4S ferredoxin, iron-sulphur binding, conserved site</a>    | RT |  |  | 4     | 8.9E-1  | 1.0E0     |
| Annotation Cluster 51    |                 | Enrichment Score: 0.12                                                     |    |  |  | Count | P_Value | Benjamini |
| <input type="checkbox"/> | GOTERM_CC_FAT   | <a href="#">coated membrane</a>                                            | RT |  |  | 10    | 3.8E-1  | 1.0E0     |
| <input type="checkbox"/> | GOTERM_CC_FAT   | <a href="#">membrane coat</a>                                              | RT |  |  | 10    | 3.8E-1  | 1.0E0     |
| <input type="checkbox"/> | GOTERM_CC_FAT   | <a href="#">transport vesicle membrane</a>                                 | RT |  |  | 4     | 6.2E-1  | 1.0E0     |
| <input type="checkbox"/> | GOTERM_CC_FAT   | <a href="#">transport vesicle</a>                                          | RT |  |  | 4     | 6.2E-1  | 1.0E0     |

|                          |                       |                                                                                                                              |    |  |       |         |           |
|--------------------------|-----------------------|------------------------------------------------------------------------------------------------------------------------------|----|--|-------|---------|-----------|
| <input type="checkbox"/> | GOTERM_BP_FAT         | <a href="#">vesicle-mediated transport</a>                                                                                   | RT |  | 17    | 6.6E-1  | 1.0E0     |
| <input type="checkbox"/> | GOTERM_CC_FAT         | <a href="#">Golgi apparatus part</a>                                                                                         | RT |  | 5     | 7.7E-1  | 1.0E0     |
| <input type="checkbox"/> | GOTERM_CC_FAT         | <a href="#">membrane-bounded vesicle</a>                                                                                     | RT |  | 4     | 7.7E-1  | 1.0E0     |
| <input type="checkbox"/> | GOTERM_CC_FAT         | <a href="#">vesicle</a>                                                                                                      | RT |  | 4     | 7.7E-1  | 1.0E0     |
| <input type="checkbox"/> | GOTERM_CC_FAT         | <a href="#">cytoplasmic vesicle part</a>                                                                                     | RT |  | 4     | 7.7E-1  | 1.0E0     |
| <input type="checkbox"/> | GOTERM_CC_FAT         | <a href="#">cytoplasmic membrane-bounded vesicle</a>                                                                         | RT |  | 4     | 7.7E-1  | 1.0E0     |
| <input type="checkbox"/> | GOTERM_CC_FAT         | <a href="#">vesicle membrane</a>                                                                                             | RT |  | 4     | 7.7E-1  | 1.0E0     |
| <input type="checkbox"/> | GOTERM_CC_FAT         | <a href="#">cytoplasmic vesicle</a>                                                                                          | RT |  | 4     | 7.7E-1  | 1.0E0     |
| <input type="checkbox"/> | GOTERM_CC_FAT         | <a href="#">cytoplasmic vesicle membrane</a>                                                                                 | RT |  | 4     | 7.7E-1  | 1.0E0     |
| <input type="checkbox"/> | GOTERM_CC_FAT         | <a href="#">coated vesicle membrane</a>                                                                                      | RT |  | 4     | 7.7E-1  | 1.0E0     |
| <input type="checkbox"/> | GOTERM_CC_FAT         | <a href="#">coated vesicle</a>                                                                                               | RT |  | 4     | 7.7E-1  | 1.0E0     |
| <input type="checkbox"/> | GOTERM_CC_FAT         | <a href="#">vesicle coat</a>                                                                                                 | RT |  | 4     | 7.7E-1  | 1.0E0     |
| <input type="checkbox"/> | GOTERM_BP_FAT         | <a href="#">Golgi vesicle transport</a>                                                                                      | RT |  | 4     | 7.8E-1  | 1.0E0     |
| <input type="checkbox"/> | GOTERM_BP_FAT         | <a href="#">ER to Golgi vesicle-mediated transport</a>                                                                       | RT |  | 4     | 7.8E-1  | 1.0E0     |
| <input type="checkbox"/> | GOTERM_CC_FAT         | <a href="#">ER to Golgi transport vesicle membrane</a>                                                                       | RT |  | 3     | 7.8E-1  | 1.0E0     |
| <input type="checkbox"/> | GOTERM_CC_FAT         | <a href="#">ER to Golgi transport vesicle</a>                                                                                | RT |  | 3     | 7.8E-1  | 1.0E0     |
| <input type="checkbox"/> | GOTERM_CC_FAT         | <a href="#">COPII vesicle coat</a>                                                                                           | RT |  | 3     | 7.8E-1  | 1.0E0     |
| <input type="checkbox"/> | GOTERM_CC_FAT         | <a href="#">endomembrane system</a>                                                                                          | RT |  | 9     | 7.9E-1  | 1.0E0     |
| <input type="checkbox"/> | GOTERM_BP_FAT         | <a href="#">intracellular transport</a>                                                                                      | RT |  | 15    | 8.3E-1  | 1.0E0     |
| <input type="checkbox"/> | GOTERM_BP_FAT         | <a href="#">protein localization</a>                                                                                         | RT |  | 18    | 8.5E-1  | 1.0E0     |
| <input type="checkbox"/> | GOTERM_CC_FAT         | <a href="#">organelle membrane</a>                                                                                           | RT |  | 6     | 8.6E-1  | 1.0E0     |
| <input type="checkbox"/> | GOTERM_BP_FAT         | <a href="#">intracellular protein transport</a>                                                                              | RT |  | 12    | 8.7E-1  | 1.0E0     |
| <input type="checkbox"/> | GOTERM_BP_FAT         | <a href="#">cellular macromolecule localization</a>                                                                          | RT |  | 12    | 8.7E-1  | 1.0E0     |
| <input type="checkbox"/> | GOTERM_BP_FAT         | <a href="#">cellular protein localization</a>                                                                                | RT |  | 12    | 8.7E-1  | 1.0E0     |
| <input type="checkbox"/> | GOTERM_BP_FAT         | <a href="#">establishment of protein localization</a>                                                                        | RT |  | 17    | 8.8E-1  | 1.0E0     |
| <input type="checkbox"/> | GOTERM_BP_FAT         | <a href="#">protein transport</a>                                                                                            | RT |  | 17    | 8.8E-1  | 1.0E0     |
| <input type="checkbox"/> | GOTERM_CC_FAT         | <a href="#">Golgi apparatus</a>                                                                                              | RT |  | 5     | 9.5E-1  | 1.0E0     |
|                          | Annotation Cluster 52 | Enrichment Score: 0.12                                                                                                       |    |  | Count | P_Value | Benjamini |
| <input type="checkbox"/> | GOTERM_MF_FAT         | <a href="#">endoribonuclease activity</a>                                                                                    | RT |  | 4     | 6.3E-1  | 1.0E0     |
| <input type="checkbox"/> | GOTERM_MF_FAT         | <a href="#">ribonuclease activity</a>                                                                                        | RT |  | 6     | 7.8E-1  | 1.0E0     |
| <input type="checkbox"/> | GOTERM_MF_FAT         | <a href="#">endoribonuclease activity, producing 5'-phosphomonoesters</a>                                                    | RT |  | 3     | 7.8E-1  | 1.0E0     |
| <input type="checkbox"/> | GOTERM_MF_FAT         | <a href="#">endonuclease activity, active with either ribo- or deoxyribonucleic acids and producing 5'-phosphomonoesters</a> | RT |  | 4     | 8.7E-1  | 1.0E0     |
|                          | Annotation Cluster 53 | Enrichment Score: 0.12                                                                                                       |    |  | Count | P_Value | Benjamini |
| <input type="checkbox"/> | INTERPRO              | <a href="#">CDP-alcohol phosphatidyltransferase</a>                                                                          | RT |  | 3     | 6.2E-1  | 1.0E0     |
| <input type="checkbox"/> | GOTERM_BP_FAT         | <a href="#">phospholipid biosynthetic process</a>                                                                            | RT |  | 5     | 6.5E-1  | 1.0E0     |
| <input type="checkbox"/> | GOTERM_MF_FAT         | <a href="#">phosphotransferase activity, for other substituted phosphate groups</a>                                          | RT |  | 3     | 7.8E-1  | 1.0E0     |
| <input type="checkbox"/> | GOTERM_BP_FAT         | <a href="#">phospholipid metabolic process</a>                                                                               | RT |  | 7     | 7.9E-1  | 1.0E0     |
| <input type="checkbox"/> | GOTERM_BP_FAT         | <a href="#">organophosphate metabolic process</a>                                                                            | RT |  | 7     | 8.6E-1  | 1.0E0     |
| <input type="checkbox"/> | GOTERM_BP_FAT         | <a href="#">lipid biosynthetic process</a>                                                                                   | RT |  | 7     | 9.1E-1  | 1.0E0     |
|                          | Annotation Cluster 54 | Enrichment Score: 0.12                                                                                                       |    |  | Count | P_Value | Benjamini |
| <input type="checkbox"/> | INTERPRO              | <a href="#">Pyridoxal phosphate-dependent transferase, major region, subdomain 1</a>                                         | RT |  | 6     | 5.5E-1  | 1.0E0     |
| <input type="checkbox"/> | INTERPRO              | <a href="#">Aminotransferase, class V/Cysteine desulfurase</a>                                                               | RT |  | 3     | 6.2E-1  | 1.0E0     |
| <input type="checkbox"/> | GOTERM_MF_FAT         | <a href="#">vitamin binding</a>                                                                                              | RT |  | 7     | 6.8E-1  | 1.0E0     |
| <input type="checkbox"/> | GOTERM_MF_FAT         | <a href="#">pyridoxal phosphate binding</a>                                                                                  | RT |  | 6     | 7.8E-1  | 1.0E0     |
| <input type="checkbox"/> | GOTERM_MF_FAT         | <a href="#">vitamin B6 binding</a>                                                                                           | RT |  | 6     | 7.8E-1  | 1.0E0     |
| <input type="checkbox"/> | GOTERM_MF_FAT         | <a href="#">transferase activity, transferring nitrogenous groups</a>                                                        | RT |  | 4     | 8.7E-1  | 1.0E0     |
| <input type="checkbox"/> | SP_PIR_KEYWORDS       | <a href="#">Aminotransferase</a>                                                                                             | RT |  | 3     | 8.9E-1  | 9.9E-1    |
| <input type="checkbox"/> | GOTERM_MF_FAT         | <a href="#">transaminase activity</a>                                                                                        | RT |  | 3     | 8.9E-1  | 1.0E0     |
| <input type="checkbox"/> | INTERPRO              | <a href="#">Aminotransferase, class I and II</a>                                                                             | RT |  | 3     | 9.0E-1  | 1.0E0     |
|                          | Annotation Cluster 55 | Enrichment Score: 0.1                                                                                                        |    |  | Count | P_Value | Benjamini |
| <input type="checkbox"/> | GOTERM_BP_FAT         | <a href="#">secretion by cell</a>                                                                                            | RT |  | 3     | 7.9E-1  | 1.0E0     |
| <input type="checkbox"/> | GOTERM_BP_FAT         | <a href="#">vesicle docking</a>                                                                                              | RT |  | 3     | 7.9E-1  | 1.0E0     |
| <input type="checkbox"/> | GOTERM_BP_FAT         | <a href="#">membrane docking</a>                                                                                             | RT |  | 3     | 7.9E-1  | 1.0E0     |
| <input type="checkbox"/> | GOTERM_BP_FAT         | <a href="#">vesicle docking during exocytosis</a>                                                                            | RT |  | 3     | 7.9E-1  | 1.0E0     |
| <input type="checkbox"/> | GOTERM_BP_FAT         | <a href="#">secretion</a>                                                                                                    | RT |  | 3     | 7.9E-1  | 1.0E0     |
| <input type="checkbox"/> | GOTERM_BP_FAT         | <a href="#">exocytosis</a>                                                                                                   | RT |  | 3     | 7.9E-1  | 1.0E0     |



| <input type="checkbox"/> |                        |                                                                                           |           |  |  |  |  |  |       |         |           |
|--------------------------|------------------------|-------------------------------------------------------------------------------------------|-----------|--|--|--|--|--|-------|---------|-----------|
| <input type="checkbox"/> | <b>INTERPRO</b>        | <a href="#">Sec1-like protein</a>                                                         | <b>RT</b> |  |  |  |  |  | 3     | 8.0E-1  | 1.0E0     |
|                          | Annotation Cluster 56  | Enrichment Score: 0.09                                                                    |           |  |  |  |  |  | Count | P_Value | Benjamini |
| <input type="checkbox"/> | <b>KEGG_PATHWAY</b>    | <a href="#">Ribosome</a>                                                                  | <b>RT</b> |  |  |  |  |  | 38    | 6.4E-1  | 1.0E0     |
| <input type="checkbox"/> | <b>GOTERM_BP_FAT</b>   | <a href="#">translation</a>                                                               | <b>RT</b> |  |  |  |  |  | 62    | 7.6E-1  | 1.0E0     |
| <input type="checkbox"/> | <b>SP_PIR_KEYWORDS</b> | <a href="#">ribosomal protein</a>                                                         | <b>RT</b> |  |  |  |  |  | 39    | 8.0E-1  | 9.9E-1    |
| <input type="checkbox"/> | <b>GOTERM_CC_FAT</b>   | <a href="#">ribonucleoprotein complex</a>                                                 | <b>RT</b> |  |  |  |  |  | 54    | 8.1E-1  | 1.0E0     |
| <input type="checkbox"/> | <b>GOTERM_MF_FAT</b>   | <a href="#">structural constituent of ribosome</a>                                        | <b>RT</b> |  |  |  |  |  | 37    | 8.2E-1  | 1.0E0     |
| <input type="checkbox"/> | <b>GOTERM_CC_FAT</b>   | <a href="#">ribosome</a>                                                                  | <b>RT</b> |  |  |  |  |  | 40    | 8.6E-1  | 1.0E0     |
| <input type="checkbox"/> | <b>GOTERM_MF_FAT</b>   | <a href="#">structural molecule activity</a>                                              | <b>RT</b> |  |  |  |  |  | 44    | 8.6E-1  | 1.0E0     |
| <input type="checkbox"/> | <b>GOTERM_CC_FAT</b>   | <a href="#">intracellular non-membrane-bounded organelle</a>                              | <b>RT</b> |  |  |  |  |  | 85    | 9.1E-1  | 1.0E0     |
| <input type="checkbox"/> | <b>GOTERM_CC_FAT</b>   | <a href="#">non-membrane-bounded organelle</a>                                            | <b>RT</b> |  |  |  |  |  | 85    | 9.1E-1  | 1.0E0     |
|                          | Annotation Cluster 57  | Enrichment Score: 0.08                                                                    |           |  |  |  |  |  | Count | P_Value | Benjamini |
| <input type="checkbox"/> | <b>SP_PIR_KEYWORDS</b> | <a href="#">Endonuclease</a>                                                              | <b>RT</b> |  |  |  |  |  | 17    | 7.2E-1  | 9.9E-1    |
| <input type="checkbox"/> | <b>GOTERM_MF_FAT</b>   | <a href="#">endonuclease activity</a>                                                     | <b>RT</b> |  |  |  |  |  | 19    | 7.4E-1  | 1.0E0     |
| <input type="checkbox"/> | <b>SP_PIR_KEYWORDS</b> | <a href="#">rna-directed dna polymerase</a>                                               | <b>RT</b> |  |  |  |  |  | 13    | 7.5E-1  | 9.9E-1    |
| <input type="checkbox"/> | <b>GOTERM_MF_FAT</b>   | <a href="#">RNA-directed DNA polymerase activity</a>                                      | <b>RT</b> |  |  |  |  |  | 13    | 8.1E-1  | 1.0E0     |
| <input type="checkbox"/> | <b>GOTERM_MF_FAT</b>   | <a href="#">nuclease activity</a>                                                         | <b>RT</b> |  |  |  |  |  | 25    | 9.2E-1  | 1.0E0     |
| <input type="checkbox"/> | <b>GOTERM_MF_FAT</b>   | <a href="#">nucleotidyltransferase activity</a>                                           | <b>RT</b> |  |  |  |  |  | 36    | 9.4E-1  | 1.0E0     |
| <input type="checkbox"/> | <b>GOTERM_MF_FAT</b>   | <a href="#">DNA polymerase activity</a>                                                   | <b>RT</b> |  |  |  |  |  | 15    | 9.8E-1  | 1.0E0     |
|                          | Annotation Cluster 58  | Enrichment Score: 0.07                                                                    |           |  |  |  |  |  | Count | P_Value | Benjamini |
| <input type="checkbox"/> | <b>GOTERM_BP_FAT</b>   | <a href="#">transmembrane transport</a>                                                   | <b>RT</b> |  |  |  |  |  | 14    | 4.1E-1  | 1.0E0     |
| <input type="checkbox"/> | <b>GOTERM_CC_FAT</b>   | <a href="#">proton-transporting two-sector ATPase complex, proton-transporting domain</a> | <b>RT</b> |  |  |  |  |  | 5     | 4.8E-1  | 1.0E0     |
| <input type="checkbox"/> | <b>GOTERM_CC_FAT</b>   | <a href="#">proton-transporting V-type ATPase, V0 domain</a>                              | <b>RT</b> |  |  |  |  |  | 4     | 6.2E-1  | 1.0E0     |
| <input type="checkbox"/> | <b>GOTERM_BP_FAT</b>   | <a href="#">monovalent inorganic cation transport</a>                                     | <b>RT</b> |  |  |  |  |  | 10    | 6.3E-1  | 1.0E0     |
| <input type="checkbox"/> | <b>GOTERM_CC_FAT</b>   | <a href="#">proton-transporting V-type ATPase complex</a>                                 | <b>RT</b> |  |  |  |  |  | 6     | 6.6E-1  | 1.0E0     |
| <input type="checkbox"/> | <b>KEGG_PATHWAY</b>    | <a href="#">Oxidative phosphorylation</a>                                                 | <b>RT</b> |  |  |  |  |  | 8     | 6.6E-1  | 9.9E-1    |
| <input type="checkbox"/> | <b>GOTERM_BP_FAT</b>   | <a href="#">ion transport</a>                                                             | <b>RT</b> |  |  |  |  |  | 14    | 6.9E-1  | 1.0E0     |
| <input type="checkbox"/> | <b>GOTERM_BP_FAT</b>   | <a href="#">cation transport</a>                                                          | <b>RT</b> |  |  |  |  |  | 14    | 6.9E-1  | 1.0E0     |
| <input type="checkbox"/> | <b>GOTERM_CC_FAT</b>   | <a href="#">proton-transporting two-sector ATPase complex</a>                             | <b>RT</b> |  |  |  |  |  | 9     | 7.1E-1  | 1.0E0     |
| <input type="checkbox"/> | <b>GOTERM_BP_FAT</b>   | <a href="#">generation of precursor metabolites and energy</a>                            | <b>RT</b> |  |  |  |  |  | 15    | 7.1E-1  | 1.0E0     |
| <input type="checkbox"/> | <b>GOTERM_MF_FAT</b>   | <a href="#">magnesium ion binding</a>                                                     | <b>RT</b> |  |  |  |  |  | 9     | 7.1E-1  | 1.0E0     |
| <input type="checkbox"/> | <b>GOTERM_BP_FAT</b>   | <a href="#">hydrogen transport</a>                                                        | <b>RT</b> |  |  |  |  |  | 9     | 7.1E-1  | 1.0E0     |
| <input type="checkbox"/> | <b>GOTERM_BP_FAT</b>   | <a href="#">proton transport</a>                                                          | <b>RT</b> |  |  |  |  |  | 9     | 7.1E-1  | 1.0E0     |
| <input type="checkbox"/> | <b>GOTERM_BP_FAT</b>   | <a href="#">nucleobase, nucleoside and nucleotide biosynthetic process</a>                | <b>RT</b> |  |  |  |  |  | 23    | 7.8E-1  | 1.0E0     |
| <input type="checkbox"/> | <b>GOTERM_BP_FAT</b>   | <a href="#">nucleobase, nucleoside, nucleotide and nucleic acid biosynthetic process</a>  | <b>RT</b> |  |  |  |  |  | 23    | 7.8E-1  | 1.0E0     |
| <input type="checkbox"/> | <b>GOTERM_BP_FAT</b>   | <a href="#">phospholipid transport</a>                                                    | <b>RT</b> |  |  |  |  |  | 3     | 7.9E-1  | 1.0E0     |
| <input type="checkbox"/> | <b>GOTERM_BP_FAT</b>   | <a href="#">ion transmembrane transport</a>                                               | <b>RT</b> |  |  |  |  |  | 8     | 7.9E-1  | 1.0E0     |
| <input type="checkbox"/> | <b>INTERPRO</b>        | <a href="#">ATPase, P-type, phospholipid-translocating, flippase</a>                      | <b>RT</b> |  |  |  |  |  | 3     | 8.0E-1  | 1.0E0     |
| <input type="checkbox"/> | <b>GOTERM_BP_FAT</b>   | <a href="#">nucleotide biosynthetic process</a>                                           | <b>RT</b> |  |  |  |  |  | 21    | 8.2E-1  | 1.0E0     |
| <input type="checkbox"/> | <b>GOTERM_BP_FAT</b>   | <a href="#">purine nucleotide metabolic process</a>                                       | <b>RT</b> |  |  |  |  |  | 16    | 8.4E-1  | 1.0E0     |
| <input type="checkbox"/> | <b>GOTERM_MF_FAT</b>   | <a href="#">hydrogen ion transmembrane transporter activity</a>                           | <b>RT</b> |  |  |  |  |  | 8     | 8.6E-1  | 1.0E0     |
| <input type="checkbox"/> | <b>GOTERM_MF_FAT</b>   | <a href="#">monovalent inorganic cation transmembrane transporter activity</a>            | <b>RT</b> |  |  |  |  |  | 8     | 8.6E-1  | 1.0E0     |
| <input type="checkbox"/> | <b>GOTERM_BP_FAT</b>   | <a href="#">oxidative phosphorylation</a>                                                 | <b>RT</b> |  |  |  |  |  | 7     | 8.6E-1  | 1.0E0     |
| <input type="checkbox"/> | <b>GOTERM_BP_FAT</b>   | <a href="#">ATP synthesis coupled proton transport</a>                                    | <b>RT</b> |  |  |  |  |  | 7     | 8.6E-1  | 1.0E0     |
| <input type="checkbox"/> | <b>GOTERM_BP_FAT</b>   | <a href="#">energy coupled proton transport, down electrochemical gradient</a>            | <b>RT</b> |  |  |  |  |  | 7     | 8.6E-1  | 1.0E0     |
| <input type="checkbox"/> | <b>GOTERM_BP_FAT</b>   | <a href="#">purine nucleotide biosynthetic process</a>                                    | <b>RT</b> |  |  |  |  |  | 15    | 8.8E-1  | 1.0E0     |
| <input type="checkbox"/> | <b>SP_PIR_KEYWORDS</b> | <a href="#">ion transport</a>                                                             | <b>RT</b> |  |  |  |  |  | 3     | 8.9E-1  | 9.9E-1    |
| <input type="checkbox"/> | <b>GOTERM_MF_FAT</b>   | <a href="#">phospholipid-translocating ATPase activity</a>                                | <b>RT</b> |  |  |  |  |  | 3     | 8.9E-1  | 1.0E0     |
| <input type="checkbox"/> | <b>GOTERM_MF_FAT</b>   | <a href="#">aminophospholipid transporter activity</a>                                    | <b>RT</b> |  |  |  |  |  | 3     | 8.9E-1  | 1.0E0     |
| <input type="checkbox"/> | <b>GOTERM_MF_FAT</b>   | <a href="#">phospholipid transporter activity</a>                                         | <b>RT</b> |  |  |  |  |  | 3     | 8.9E-1  | 1.0E0     |
| <input type="checkbox"/> | <b>GOTERM_BP_FAT</b>   | <a href="#">lipid transport</a>                                                           | <b>RT</b> |  |  |  |  |  | 3     | 8.9E-1  | 1.0E0     |
| <input type="checkbox"/> | <b>GOTERM_BP_FAT</b>   | <a href="#">lipid localization</a>                                                        | <b>RT</b> |  |  |  |  |  | 3     | 8.9E-1  | 1.0E0     |
| <input type="checkbox"/> | <b>GOTERM_MF_FAT</b>   | <a href="#">inorganic cation transmembrane transporter activity</a>                       | <b>RT</b> |  |  |  |  |  | 9     | 9.0E-1  | 1.0E0     |
| <input type="checkbox"/> | <b>GOTERM_BP_FAT</b>   | <a href="#">nitrogen compound biosynthetic process</a>                                    | <b>RT</b> |  |  |  |  |  | 25    | 9.1E-1  | 1.0E0     |
| <input type="checkbox"/> | <b>GOTERM_BP_FAT</b>   | <a href="#">purine ribonucleotide metabolic process</a>                                   | <b>RT</b> |  |  |  |  |  | 14    | 9.1E-1  | 1.0E0     |

|                          |                       |                                                                                                                |    |  |       |         |           |
|--------------------------|-----------------------|----------------------------------------------------------------------------------------------------------------|----|--|-------|---------|-----------|
| <input type="checkbox"/> | GOTERM_BP_FAT         | <a href="#">purine ribonucleotide biosynthetic process</a>                                                     | RT |  | 14    | 9.1E-1  | 1.0E0     |
| <input type="checkbox"/> | GOTERM_BP_FAT         | <a href="#">ribonucleotide metabolic process</a>                                                               | RT |  | 14    | 9.1E-1  | 1.0E0     |
| <input type="checkbox"/> | GOTERM_BP_FAT         | <a href="#">ribonucleotide biosynthetic process</a>                                                            | RT |  | 14    | 9.1E-1  | 1.0E0     |
| <input type="checkbox"/> | GOTERM_BP_FAT         | <a href="#">purine nucleoside triphosphate metabolic process</a>                                               | RT |  | 13    | 9.4E-1  | 1.0E0     |
| <input type="checkbox"/> | GOTERM_BP_FAT         | <a href="#">purine nucleoside triphosphate biosynthetic process</a>                                            | RT |  | 13    | 9.4E-1  | 1.0E0     |
| <input type="checkbox"/> | GOTERM_BP_FAT         | <a href="#">nucleoside triphosphate metabolic process</a>                                                      | RT |  | 13    | 9.4E-1  | 1.0E0     |
| <input type="checkbox"/> | GOTERM_BP_FAT         | <a href="#">nucleoside triphosphate biosynthetic process</a>                                                   | RT |  | 13    | 9.4E-1  | 1.0E0     |
| <input type="checkbox"/> | GOTERM_BP_FAT         | <a href="#">purine ribonucleoside triphosphate metabolic process</a>                                           | RT |  | 13    | 9.4E-1  | 1.0E0     |
| <input type="checkbox"/> | GOTERM_BP_FAT         | <a href="#">purine ribonucleoside triphosphate biosynthetic process</a>                                        | RT |  | 13    | 9.4E-1  | 1.0E0     |
| <input type="checkbox"/> | GOTERM_BP_FAT         | <a href="#">ribonucleoside triphosphate metabolic process</a>                                                  | RT |  | 13    | 9.4E-1  | 1.0E0     |
| <input type="checkbox"/> | GOTERM_BP_FAT         | <a href="#">ribonucleoside triphosphate biosynthetic process</a>                                               | RT |  | 13    | 9.4E-1  | 1.0E0     |
| <input type="checkbox"/> | GOTERM_BP_FAT         | <a href="#">ATP metabolic process</a>                                                                          | RT |  | 12    | 9.4E-1  | 1.0E0     |
| <input type="checkbox"/> | GOTERM_BP_FAT         | <a href="#">ATP biosynthetic process</a>                                                                       | RT |  | 12    | 9.4E-1  | 1.0E0     |
| <input type="checkbox"/> | GOTERM_MF_FAT         | <a href="#">lipid transporter activity</a>                                                                     | RT |  | 3     | 9.4E-1  | 1.0E0     |
| <input type="checkbox"/> | GOTERM_MF_FAT         | <a href="#">ATPase activity, coupled to transmembrane movement of ions, phosphorylative mechanism</a>          | RT |  | 5     | 9.7E-1  | 1.0E0     |
| <input type="checkbox"/> | INTERPRO              | <a href="#">ATPase, P-type, K/Mg/Cd/Cu/Zn/Na/Ca/Na/H-transporter</a>                                           | RT |  | 5     | 9.8E-1  | 1.0E0     |
| <input type="checkbox"/> | GOTERM_CC_FAT         | <a href="#">proton-transporting two-sector ATPase complex, catalytic domain</a>                                | RT |  | 3     | 9.9E-1  | 1.0E0     |
| <input type="checkbox"/> | INTERPRO              | <a href="#">ATPase, P-type phosphorylation site</a>                                                            | RT |  | 3     | 9.9E-1  | 1.0E0     |
| <input type="checkbox"/> | INTERPRO              | <a href="#">ATPase, P-type, ATPase-associated region</a>                                                       | RT |  | 4     | 9.9E-1  | 1.0E0     |
| <input type="checkbox"/> | GOTERM_MF_FAT         | <a href="#">ATPase activity, coupled to transmembrane movement of ions</a>                                     | RT |  | 7     | 1.0E0   | 1.0E0     |
| <input type="checkbox"/> | GOTERM_MF_FAT         | <a href="#">cation-transporting ATPase activity</a>                                                            | RT |  | 3     | 1.0E0   | 1.0E0     |
| <input type="checkbox"/> | GOTERM_MF_FAT         | <a href="#">hydrolase activity, acting on acid anhydrides, catalyzing transmembrane movement of substances</a> | RT |  | 11    | 1.0E0   | 1.0E0     |
| <input type="checkbox"/> | GOTERM_MF_FAT         | <a href="#">primary active transmembrane transporter activity</a>                                              | RT |  | 10    | 1.0E0   | 1.0E0     |
| <input type="checkbox"/> | GOTERM_MF_FAT         | <a href="#">P-P-bond-hydrolysis-driven transmembrane transporter activity</a>                                  | RT |  | 10    | 1.0E0   | 1.0E0     |
| <input type="checkbox"/> | GOTERM_MF_FAT         | <a href="#">ATPase activity, coupled to movement of substances</a>                                             | RT |  | 9     | 1.0E0   | 1.0E0     |
| <input type="checkbox"/> | GOTERM_MF_FAT         | <a href="#">ATPase activity, coupled to transmembrane movement of substances</a>                               | RT |  | 9     | 1.0E0   | 1.0E0     |
|                          | Annotation Cluster 59 | Enrichment Score: 0.07                                                                                         |    |  | Count | P_Value | Benjamini |
| <input type="checkbox"/> | COG_ONTOLOGY          | <a href="#">Lipid metabolism</a>                                                                               | RT |  | 8     | 7.5E-1  | 1.0E0     |
| <input type="checkbox"/> | INTERPRO              | <a href="#">Phospholipid/glycerol acyltransferase</a>                                                          | RT |  | 3     | 9.0E-1  | 1.0E0     |
| <input type="checkbox"/> | SMART                 | <a href="#">PlsC</a>                                                                                           | RT |  | 3     | 9.0E-1  | 1.0E0     |
|                          | Annotation Cluster 60 | Enrichment Score: 0.06                                                                                         |    |  | Count | P_Value | Benjamini |
| <input type="checkbox"/> | SP_PIR_KEYWORDS       | <a href="#">protein biosynthesis</a>                                                                           | RT |  | 7     | 5.5E-1  | 1.0E0     |
| <input type="checkbox"/> | GOTERM_BP_FAT         | <a href="#">ncRNA metabolic process</a>                                                                        | RT |  | 29    | 7.3E-1  | 1.0E0     |
| <input type="checkbox"/> | GOTERM_BP_FAT         | <a href="#">tRNA metabolic process</a>                                                                         | RT |  | 21    | 8.6E-1  | 1.0E0     |
| <input type="checkbox"/> | SP_PIR_KEYWORDS       | <a href="#">Aminoacyl-tRNA synthetase</a>                                                                      | RT |  | 12    | 8.6E-1  | 9.9E-1    |
| <input type="checkbox"/> | INTERPRO              | <a href="#">Aminoacyl-tRNA synthetase, class I, conserved site</a>                                             | RT |  | 5     | 8.8E-1  | 1.0E0     |
| <input type="checkbox"/> | GOTERM_MF_FAT         | <a href="#">ligase activity, forming carbon-oxygen bonds</a>                                                   | RT |  | 12    | 9.0E-1  | 1.0E0     |
| <input type="checkbox"/> | GOTERM_MF_FAT         | <a href="#">aminoacyl-tRNA ligase activity</a>                                                                 | RT |  | 12    | 9.0E-1  | 1.0E0     |
| <input type="checkbox"/> | GOTERM_MF_FAT         | <a href="#">ligase activity, forming aminoacyl-tRNA and related compounds</a>                                  | RT |  | 12    | 9.0E-1  | 1.0E0     |
| <input type="checkbox"/> | KEGG_PATHWAY          | <a href="#">Aminoacyl-tRNA biosynthesis</a>                                                                    | RT |  | 10    | 9.3E-1  | 1.0E0     |
| <input type="checkbox"/> | GOTERM_BP_FAT         | <a href="#">tRNA aminoacylation</a>                                                                            | RT |  | 11    | 9.4E-1  | 1.0E0     |
| <input type="checkbox"/> | GOTERM_BP_FAT         | <a href="#">amino acid activation</a>                                                                          | RT |  | 11    | 9.4E-1  | 1.0E0     |
| <input type="checkbox"/> | GOTERM_BP_FAT         | <a href="#">tRNA aminoacylation for protein translation</a>                                                    | RT |  | 10    | 9.6E-1  | 1.0E0     |
| <input type="checkbox"/> | INTERPRO              | <a href="#">Aminoacyl-tRNA synthetase, class II, conserved region</a>                                          | RT |  | 4     | 9.7E-1  | 1.0E0     |
|                          | Annotation Cluster 61 | Enrichment Score: 0.06                                                                                         |    |  | Count | P_Value | Benjamini |
| <input type="checkbox"/> | SP_PIR_KEYWORDS       | <a href="#">Protease</a>                                                                                       | RT |  | 20    | 7.5E-1  | 9.9E-1    |
| <input type="checkbox"/> | SP_PIR_KEYWORDS       | <a href="#">thiol protease</a>                                                                                 | RT |  | 6     | 7.8E-1  | 9.9E-1    |
| <input type="checkbox"/> | GOTERM_MF_FAT         | <a href="#">peptidase activity</a>                                                                             | RT |  | 42    | 8.5E-1  | 1.0E0     |
| <input type="checkbox"/> | INTERPRO              | <a href="#">Peptidase C1A, papain C-terminal</a>                                                               | RT |  | 14    | 9.0E-1  | 1.0E0     |
| <input type="checkbox"/> | INTERPRO              | <a href="#">Peptidase C1A, papain</a>                                                                          | RT |  | 14    | 9.0E-1  | 1.0E0     |
| <input type="checkbox"/> | SMART                 | <a href="#">Pept_C1</a>                                                                                        | RT |  | 14    | 9.0E-1  | 1.0E0     |
| <input type="checkbox"/> | GOTERM_MF_FAT         | <a href="#">peptidase activity, acting on L-amino acid peptides</a>                                            | RT |  | 35    | 9.0E-1  | 1.0E0     |

| <input type="checkbox"/> | Annotation            | Term                                                                                    | RT |  | Count | P_Value | Benjamini |
|--------------------------|-----------------------|-----------------------------------------------------------------------------------------|----|--|-------|---------|-----------|
| <input type="checkbox"/> | GOTERM_MF_FAT         | <a href="#">cysteine-type endopeptidase activity</a>                                    | RT |  | 12    | 9.0E-1  | 1.0E0     |
| <input type="checkbox"/> | GOTERM_MF_FAT         | <a href="#">cysteine-type peptidase activity</a>                                        | RT |  | 15    | 9.1E-1  | 1.0E0     |
| <input type="checkbox"/> | GOTERM_MF_FAT         | <a href="#">endopeptidase activity</a>                                                  | RT |  | 23    | 9.2E-1  | 1.0E0     |
| <input type="checkbox"/> | INTERPRO              | <a href="#">Peptidase, cysteine peptidase active site</a>                               | RT |  | 15    | 9.3E-1  | 1.0E0     |
|                          | Annotation Cluster 62 | Enrichment Score: 0.06                                                                  |    |  | Count | P_Value | Benjamini |
| <input type="checkbox"/> | GOTERM_BP_FAT         | <a href="#">negative regulation of gene expression</a>                                  | RT |  | 4     | 8.7E-1  | 1.0E0     |
| <input type="checkbox"/> | GOTERM_BP_FAT         | <a href="#">negative regulation of macromolecule metabolic process</a>                  | RT |  | 4     | 8.7E-1  | 1.0E0     |
| <input type="checkbox"/> | GOTERM_BP_FAT         | <a href="#">gene silencing</a>                                                          | RT |  | 4     | 8.7E-1  | 1.0E0     |
|                          | Annotation Cluster 63 | Enrichment Score: 0.06                                                                  |    |  | Count | P_Value | Benjamini |
| <input type="checkbox"/> | GOTERM_BP_FAT         | <a href="#">cellular carbohydrate biosynthetic process</a>                              | RT |  | 4     | 8.7E-1  | 1.0E0     |
| <input type="checkbox"/> | GOTERM_BP_FAT         | <a href="#">carbohydrate biosynthetic process</a>                                       | RT |  | 4     | 8.7E-1  | 1.0E0     |
| <input type="checkbox"/> | GOTERM_BP_FAT         | <a href="#">alcohol biosynthetic process</a>                                            | RT |  | 3     | 8.9E-1  | 1.0E0     |
|                          | Annotation Cluster 64 | Enrichment Score: 0.06                                                                  |    |  | Count | P_Value | Benjamini |
| <input type="checkbox"/> | INTERPRO              | <a href="#">Thioredoxin, conserved site</a>                                             | RT |  | 4     | 8.0E-1  | 1.0E0     |
| <input type="checkbox"/> | INTERPRO              | <a href="#">Thioredoxin-like</a>                                                        | RT |  | 7     | 8.8E-1  | 1.0E0     |
| <input type="checkbox"/> | INTERPRO              | <a href="#">Thioredoxin-like subdomain</a>                                              | RT |  | 3     | 9.0E-1  | 1.0E0     |
| <input type="checkbox"/> | INTERPRO              | <a href="#">Thioredoxin domain</a>                                                      | RT |  | 3     | 9.5E-1  | 1.0E0     |
|                          | Annotation Cluster 65 | Enrichment Score: 0.06                                                                  |    |  | Count | P_Value | Benjamini |
| <input type="checkbox"/> | GOTERM_CC_FAT         | <a href="#">cytoskeleton</a>                                                            | RT |  | 29    | 8.2E-1  | 1.0E0     |
| <input type="checkbox"/> | GOTERM_BP_FAT         | <a href="#">microtubule-based process</a>                                               | RT |  | 29    | 8.3E-1  | 1.0E0     |
| <input type="checkbox"/> | INTERPRO              | <a href="#">Kinesin, motor region, conserved site</a>                                   | RT |  | 10    | 8.3E-1  | 1.0E0     |
| <input type="checkbox"/> | INTERPRO              | <a href="#">Kinesin, motor region</a>                                                   | RT |  | 15    | 8.6E-1  | 1.0E0     |
| <input type="checkbox"/> | SMART                 | <a href="#">KISc</a>                                                                    | RT |  | 15    | 8.6E-1  | 1.0E0     |
| <input type="checkbox"/> | GOTERM_CC_FAT         | <a href="#">microtubule</a>                                                             | RT |  | 17    | 8.8E-1  | 1.0E0     |
| <input type="checkbox"/> | GOTERM_CC_FAT         | <a href="#">microtubule cytoskeleton</a>                                                | RT |  | 27    | 8.9E-1  | 1.0E0     |
| <input type="checkbox"/> | GOTERM_CC_FAT         | <a href="#">cytoskeletal part</a>                                                       | RT |  | 27    | 8.9E-1  | 1.0E0     |
| <input type="checkbox"/> | SP_PIR_KEYWORDS       | <a href="#">motor protein</a>                                                           | RT |  | 12    | 9.0E-1  | 9.9E-1    |
| <input type="checkbox"/> | SP_PIR_KEYWORDS       | <a href="#">microtubule</a>                                                             | RT |  | 16    | 9.1E-1  | 9.9E-1    |
| <input type="checkbox"/> | GOTERM_MF_FAT         | <a href="#">motor activity</a>                                                          | RT |  | 21    | 9.2E-1  | 1.0E0     |
| <input type="checkbox"/> | GOTERM_MF_FAT         | <a href="#">microtubule motor activity</a>                                              | RT |  | 21    | 9.2E-1  | 1.0E0     |
| <input type="checkbox"/> | GOTERM_BP_FAT         | <a href="#">microtubule-based movement</a>                                              | RT |  | 23    | 9.5E-1  | 1.0E0     |
|                          | Annotation Cluster 66 | Enrichment Score: 0.05                                                                  |    |  | Count | P_Value | Benjamini |
| <input type="checkbox"/> | GOTERM_CC_FAT         | <a href="#">intracellular organelle lumen</a>                                           | RT |  | 3     | 8.9E-1  | 1.0E0     |
| <input type="checkbox"/> | GOTERM_CC_FAT         | <a href="#">membrane-enclosed lumen</a>                                                 | RT |  | 3     | 8.9E-1  | 1.0E0     |
| <input type="checkbox"/> | GOTERM_CC_FAT         | <a href="#">nuclear lumen</a>                                                           | RT |  | 3     | 8.9E-1  | 1.0E0     |
| <input type="checkbox"/> | GOTERM_CC_FAT         | <a href="#">organelle lumen</a>                                                         | RT |  | 3     | 8.9E-1  | 1.0E0     |
|                          | Annotation Cluster 67 | Enrichment Score: 0.05                                                                  |    |  | Count | P_Value | Benjamini |
| <input type="checkbox"/> | GOTERM_MF_FAT         | <a href="#">structure-specific DNA binding</a>                                          | RT |  | 3     | 8.9E-1  | 1.0E0     |
| <input type="checkbox"/> | GOTERM_MF_FAT         | <a href="#">double-stranded DNA binding</a>                                             | RT |  | 3     | 8.9E-1  | 1.0E0     |
| <input type="checkbox"/> | GOTERM_MF_FAT         | <a href="#">mismatched DNA binding</a>                                                  | RT |  | 3     | 8.9E-1  | 1.0E0     |
| <input type="checkbox"/> | GOTERM_BP_FAT         | <a href="#">mismatch repair</a>                                                         | RT |  | 3     | 8.9E-1  | 1.0E0     |
|                          | Annotation Cluster 68 | Enrichment Score: 0.05                                                                  |    |  | Count | P_Value | Benjamini |
| <input type="checkbox"/> | INTERPRO              | <a href="#">WD40 repeat</a>                                                             | RT |  | 41    | 8.1E-1  | 1.0E0     |
| <input type="checkbox"/> | SMART                 | <a href="#">WD40</a>                                                                    | RT |  | 41    | 8.1E-1  | 1.0E0     |
| <input type="checkbox"/> | INTERPRO              | <a href="#">WD40/YVTN repeat-like</a>                                                   | RT |  | 39    | 8.6E-1  | 1.0E0     |
| <input type="checkbox"/> | INTERPRO              | <a href="#">WD40 repeat, conserved site</a>                                             | RT |  | 15    | 9.0E-1  | 1.0E0     |
| <input type="checkbox"/> | INTERPRO              | <a href="#">WD40 repeat, subgroup</a>                                                   | RT |  | 29    | 9.2E-1  | 1.0E0     |
| <input type="checkbox"/> | SP_PIR_KEYWORDS       | <a href="#">wd repeat</a>                                                               | RT |  | 24    | 9.4E-1  | 1.0E0     |
| <input type="checkbox"/> | INTERPRO              | <a href="#">WD40 repeat 2</a>                                                           | RT |  | 21    | 9.6E-1  | 1.0E0     |
| <input type="checkbox"/> | INTERPRO              | <a href="#">WD40 repeat, region</a>                                                     | RT |  | 23    | 9.6E-1  | 1.0E0     |
|                          | Annotation Cluster 69 | Enrichment Score: 0.05                                                                  |    |  | Count | P_Value | Benjamini |
| <input type="checkbox"/> | INTERPRO              | <a href="#">ABC transporter, conserved site</a>                                         | RT |  | 12    | 8.4E-1  | 1.0E0     |
| <input type="checkbox"/> | COG_ONTOLOGY          | <a href="#">Defense mechanisms</a>                                                      | RT |  | 12    | 8.7E-1  | 1.0E0     |
| <input type="checkbox"/> | INTERPRO              | <a href="#">ABC transporter-like</a>                                                    | RT |  | 10    | 9.8E-1  | 1.0E0     |
|                          | Annotation Cluster 70 | Enrichment Score: 0.05                                                                  |    |  | Count | P_Value | Benjamini |
| <input type="checkbox"/> | GOTERM_MF_FAT         | <a href="#">antioxidant activity</a>                                                    | RT |  | 4     | 8.7E-1  | 1.0E0     |
| <input type="checkbox"/> | INTERPRO              | <a href="#">Thioredoxin-like</a>                                                        | RT |  | 7     | 8.8E-1  | 1.0E0     |
| <input type="checkbox"/> | INTERPRO              | <a href="#">Alkyl hydroperoxide reductase/ Thiol specific antioxidant/ Mal allergen</a> | RT |  | 3     | 9.5E-1  | 1.0E0     |
|                          | Annotation Cluster 71 | Enrichment Score: 0.05                                                                  |    |  | Count | P_Value | Benjamini |

| <input type="checkbox"/> | GOTERM_BP_FAT         | <a href="#">cell cycle</a>                                           | RT |  |  |  | 5     | 7.8E-1  | 1.0E0     |
|--------------------------|-----------------------|----------------------------------------------------------------------|----|--|--|--|-------|---------|-----------|
| <input type="checkbox"/> | GOTERM_BP_FAT         | <a href="#">M phase</a>                                              | RT |  |  |  | 3     | 9.4E-1  | 1.0E0     |
| <input type="checkbox"/> | GOTERM_BP_FAT         | <a href="#">cell cycle phase</a>                                     | RT |  |  |  | 3     | 9.4E-1  | 1.0E0     |
| <input type="checkbox"/> | GOTERM_BP_FAT         | <a href="#">cell cycle process</a>                                   | RT |  |  |  | 3     | 9.4E-1  | 1.0E0     |
|                          | Annotation Cluster 72 | Enrichment Score: 0.04                                               |    |  |  |  | Count | P_Value | Benjamini |
| <input type="checkbox"/> | GOTERM_BP_FAT         | <a href="#">phospholipid metabolic process</a>                       | RT |  |  |  | 7     | 7.9E-1  | 1.0E0     |
| <input type="checkbox"/> | GOTERM_BP_FAT         | <a href="#">organophosphate metabolic process</a>                    | RT |  |  |  | 7     | 8.6E-1  | 1.0E0     |
| <input type="checkbox"/> | GOTERM_BP_FAT         | <a href="#">glycerophospholipid metabolic process</a>                | RT |  |  |  | 3     | 9.7E-1  | 1.0E0     |
| <input type="checkbox"/> | GOTERM_BP_FAT         | <a href="#">phosphoinositide metabolic process</a>                   | RT |  |  |  | 3     | 9.7E-1  | 1.0E0     |
| <input type="checkbox"/> | GOTERM_BP_FAT         | <a href="#">glycerolipid metabolic process</a>                       | RT |  |  |  | 3     | 9.7E-1  | 1.0E0     |
|                          | Annotation Cluster 73 | Enrichment Score: 0.04                                               |    |  |  |  | Count | P_Value | Benjamini |
| <input type="checkbox"/> | GOTERM_BP_FAT         | <a href="#">small GTPase mediated signal transduction</a>            | RT |  |  |  | 9     | 8.0E-1  | 1.0E0     |
| <input type="checkbox"/> | INTERPRO              | <a href="#">ADP-ribosylation factor</a>                              | RT |  |  |  | 3     | 8.0E-1  | 1.0E0     |
| <input type="checkbox"/> | SMART                 | <a href="#">ARF</a>                                                  | RT |  |  |  | 3     | 8.0E-1  | 1.0E0     |
| <input type="checkbox"/> | GOTERM_BP_FAT         | <a href="#">intracellular signaling cascade</a>                      | RT |  |  |  | 11    | 8.7E-1  | 1.0E0     |
| <input type="checkbox"/> | INTERPRO              | <a href="#">ARF/SAR superfamily</a>                                  | RT |  |  |  | 4     | 8.9E-1  | 1.0E0     |
| <input type="checkbox"/> | PIR_SUPERFAMILY       | PIRSF001711:ADP-ribosylation factor                                  | RT |  |  |  | 3     | 8.9E-1  | 1.0E0     |
| <input type="checkbox"/> | INTERPRO              | <a href="#">Ras GTPase</a>                                           | RT |  |  |  | 6     | 9.6E-1  | 1.0E0     |
| <input type="checkbox"/> | GOTERM_MF_FAT         | <a href="#">guanyl ribonucleotide binding</a>                        | RT |  |  |  | 22    | 9.8E-1  | 1.0E0     |
| <input type="checkbox"/> | GOTERM_MF_FAT         | <a href="#">GTP binding</a>                                          | RT |  |  |  | 22    | 9.8E-1  | 1.0E0     |
| <input type="checkbox"/> | GOTERM_MF_FAT         | <a href="#">guanyl nucleotide binding</a>                            | RT |  |  |  | 22    | 9.8E-1  | 1.0E0     |
| <input type="checkbox"/> | INTERPRO              | <a href="#">Ras</a>                                                  | RT |  |  |  | 5     | 9.8E-1  | 1.0E0     |
| <input type="checkbox"/> | SP_PIR_KEYWORDS       | <a href="#">gtp-binding</a>                                          | RT |  |  |  | 17    | 9.9E-1  | 1.0E0     |
| <input type="checkbox"/> | INTERPRO              | <a href="#">Small GTP-binding protein</a>                            | RT |  |  |  | 8     | 9.9E-1  | 1.0E0     |
|                          | Annotation Cluster 74 | Enrichment Score: 0.03                                               |    |  |  |  | Count | P_Value | Benjamini |
| <input type="checkbox"/> | PIR_SUPERFAMILY       | PIRSF002306:tubulin                                                  | RT |  |  |  | 4     | 8.8E-1  | 1.0E0     |
| <input type="checkbox"/> | INTERPRO              | <a href="#">Tubulin/FtsZ_2-layer sandwich domain</a>                 | RT |  |  |  | 4     | 8.9E-1  | 1.0E0     |
| <input type="checkbox"/> | GOTERM_BP_FAT         | <a href="#">protein polymerization</a>                               | RT |  |  |  | 4     | 9.3E-1  | 1.0E0     |
| <input type="checkbox"/> | INTERPRO              | <a href="#">Tubulin</a>                                              | RT |  |  |  | 4     | 9.4E-1  | 1.0E0     |
| <input type="checkbox"/> | INTERPRO              | <a href="#">Tubulin/FtsZ_GTPase domain</a>                           | RT |  |  |  | 4     | 9.4E-1  | 1.0E0     |
| <input type="checkbox"/> | INTERPRO              | <a href="#">Tubulin conserved site</a>                               | RT |  |  |  | 4     | 9.4E-1  | 1.0E0     |
| <input type="checkbox"/> | GOTERM_BP_FAT         | <a href="#">protein complex assembly</a>                             | RT |  |  |  | 6     | 9.5E-1  | 1.0E0     |
| <input type="checkbox"/> | GOTERM_BP_FAT         | <a href="#">protein complex biogenesis</a>                           | RT |  |  |  | 6     | 9.5E-1  | 1.0E0     |
| <input type="checkbox"/> | GOTERM_BP_FAT         | <a href="#">cellular protein complex assembly</a>                    | RT |  |  |  | 5     | 9.6E-1  | 1.0E0     |
| <input type="checkbox"/> | GOTERM_MF_FAT         | <a href="#">GTPase activity</a>                                      | RT |  |  |  | 7     | 9.8E-1  | 1.0E0     |
|                          | Annotation Cluster 75 | Enrichment Score: 0.02                                               |    |  |  |  | Count | P_Value | Benjamini |
| <input type="checkbox"/> | INTERPRO              | <a href="#">26S proteasome subunit P45</a>                           | RT |  |  |  | 3     | 9.0E-1  | 1.0E0     |
| <input type="checkbox"/> | INTERPRO              | <a href="#">ATPase, AAA-type, conserved site</a>                     | RT |  |  |  | 6     | 9.8E-1  | 1.0E0     |
| <input type="checkbox"/> | INTERPRO              | <a href="#">ATPase, AAA-type, core</a>                               | RT |  |  |  | 9     | 1.0E0   | 1.0E0     |
|                          | Annotation Cluster 76 | Enrichment Score: 0.01                                               |    |  |  |  | Count | P_Value | Benjamini |
| <input type="checkbox"/> | INTERPRO              | <a href="#">Chaperonin TCP-1, conserved site</a>                     | RT |  |  |  | 4     | 9.7E-1  | 1.0E0     |
| <input type="checkbox"/> | INTERPRO              | <a href="#">Chaperonin Cpn60/TCP-1</a>                               | RT |  |  |  | 4     | 9.7E-1  | 1.0E0     |
| <input type="checkbox"/> | SP_PIR_KEYWORDS       | <a href="#">Chaperone</a>                                            | RT |  |  |  | 5     | 9.7E-1  | 1.0E0     |
| <input type="checkbox"/> | GOTERM_MF_FAT         | <a href="#">unfolded protein binding</a>                             | RT |  |  |  | 9     | 9.8E-1  | 1.0E0     |
| <input type="checkbox"/> | PIR_SUPERFAMILY       | PIRSF002584:molecular chaperone t-complex-type                       | RT |  |  |  | 3     | 9.9E-1  | 1.0E0     |
| <input type="checkbox"/> | SP_PIR_KEYWORDS       | <a href="#">cytoplasm</a>                                            | RT |  |  |  | 7     | 9.9E-1  | 1.0E0     |
| <input type="checkbox"/> | INTERPRO              | <a href="#">Chaperone, tailless complex polypeptide 1</a>            | RT |  |  |  | 3     | 9.9E-1  | 1.0E0     |
|                          | Annotation Cluster 77 | Enrichment Score: 0.01                                               |    |  |  |  | Count | P_Value | Benjamini |
| <input type="checkbox"/> | GOTERM_CC_FAT         | <a href="#">dynein complex</a>                                       | RT |  |  |  | 5     | 9.7E-1  | 1.0E0     |
| <input type="checkbox"/> | INTERPRO              | <a href="#">Dynein heavy chain</a>                                   | RT |  |  |  | 5     | 9.8E-1  | 1.0E0     |
| <input type="checkbox"/> | GOTERM_CC_FAT         | <a href="#">microtubule associated complex</a>                       | RT |  |  |  | 6     | 9.8E-1  | 1.0E0     |
|                          | Annotation Cluster 78 | Enrichment Score: 0.01                                               |    |  |  |  | Count | P_Value | Benjamini |
| <input type="checkbox"/> | INTERPRO              | <a href="#">Molecular chaperone, heat shock protein, Hsp40, DnaJ</a> | RT |  |  |  | 3     | 9.8E-1  | 1.0E0     |
| <input type="checkbox"/> | GOTERM_MF_FAT         | <a href="#">heat shock protein binding</a>                           | RT |  |  |  | 3     | 9.9E-1  | 1.0E0     |
| <input type="checkbox"/> | INTERPRO              | <a href="#">Heat shock protein DnaJ, N-terminal</a>                  | RT |  |  |  | 3     | 9.9E-1  | 1.0E0     |
| <input type="checkbox"/> | SMART                 | <a href="#">DnaJ</a>                                                 | RT |  |  |  | 3     | 9.9E-1  | 1.0E0     |
|                          | Annotation Cluster 79 | Enrichment Score: 0.01                                               |    |  |  |  | Count | P_Value | Benjamini |
| <input type="checkbox"/> | SP_PIR_KEYWORDS       | <a href="#">Rotamase</a>                                             | RT |  |  |  | 3     | 9.9E-1  | 1.0E0     |



## Functional Annotation Clustering

[Help and Manual](#)

Current Gene List: 3\_Random5

Current Background: Giardia intestinalis

3000 DAVID IDs

Options Classification Stringency Medium

Rerun using options

Create Sublist

84 Cluster(s)

[Download File](#)

|                          | Annotation Cluster | Enrichment Score                                             |    |  | Count | P_Value | Benjamini |
|--------------------------|--------------------|--------------------------------------------------------------|----|--|-------|---------|-----------|
| <input type="checkbox"/> | INTERPRO           | <a href="#">ATPase, AAA+ type, core</a>                      | RT |  | 48    | 1.0E-1  | 1.0E0     |
| <input type="checkbox"/> | SMART              | <a href="#">AAA</a>                                          | RT |  | 48    | 1.1E-1  | 1.0E0     |
| <input type="checkbox"/> | INTERPRO           | <a href="#">ATPase, AAA-type, core</a>                       | RT |  | 17    | 3.5E-1  | 1.0E0     |
| Annotation Cluster 2     |                    |                                                              |    |  | Count | P_Value | Benjamini |
| <input type="checkbox"/> | GOTERM_MF_FAT      | <a href="#">endonuclease activity</a>                        | RT |  | 26    | 5.1E-2  | 1.0E0     |
| <input type="checkbox"/> | GOTERM_MF_FAT      | <a href="#">nuclease activity</a>                            | RT |  | 34    | 1.8E-1  | 1.0E0     |
| <input type="checkbox"/> | GOTERM_MF_FAT      | <a href="#">nucleotidyltransferase activity</a>              | RT |  | 47    | 2.1E-1  | 1.0E0     |
| <input type="checkbox"/> | SP_PIR_KEYWORDS    | <a href="#">Endonuclease</a>                                 | RT |  | 21    | 2.6E-1  | 1.0E0     |
| <input type="checkbox"/> | GOTERM_MF_FAT      | <a href="#">RNA-directed DNA polymerase activity</a>         | RT |  | 17    | 2.8E-1  | 1.0E0     |
| <input type="checkbox"/> | SP_PIR_KEYWORDS    | <a href="#">rna-directed dna polymerase</a>                  | RT |  | 16    | 3.6E-1  | 1.0E0     |
| <input type="checkbox"/> | GOTERM_MF_FAT      | <a href="#">DNA polymerase activity</a>                      | RT |  | 22    | 4.2E-1  | 1.0E0     |
| Annotation Cluster 3     |                    |                                                              |    |  | Count | P_Value | Benjamini |
| <input type="checkbox"/> | INTERPRO           | <a href="#">Annexin</a>                                      | RT |  | 13    | 1.3E-1  | 1.0E0     |
| <input type="checkbox"/> | SP_PIR_KEYWORDS    | <a href="#">annexin</a>                                      | RT |  | 13    | 1.5E-1  | 1.0E0     |
| <input type="checkbox"/> | GOTERM_MF_FAT      | <a href="#">calcium ion binding</a>                          | RT |  | 30    | 1.5E-1  | 1.0E0     |
| <input type="checkbox"/> | GOTERM_MF_FAT      | <a href="#">lipid binding</a>                                | RT |  | 25    | 2.1E-1  | 1.0E0     |
| <input type="checkbox"/> | INTERPRO           | <a href="#">Annexin repeat</a>                               | RT |  | 11    | 2.3E-1  | 1.0E0     |
| <input type="checkbox"/> | SMART              | <a href="#">ANX</a>                                          | RT |  | 11    | 2.4E-1  | 1.0E0     |
| <input type="checkbox"/> | GOTERM_MF_FAT      | <a href="#">phospholipid binding</a>                         | RT |  | 19    | 2.6E-1  | 1.0E0     |
| <input type="checkbox"/> | INTERPRO           | <a href="#">Alpha giardin</a>                                | RT |  | 9     | 3.9E-1  | 1.0E0     |
| <input type="checkbox"/> | GOTERM_MF_FAT      | <a href="#">calcium-dependent phospholipid binding</a>       | RT |  | 15    | 4.0E-1  | 1.0E0     |
| <input type="checkbox"/> | GOTERM_BP_FAT      | <a href="#">cytoskeleton organization</a>                    | RT |  | 11    | 4.6E-1  | 1.0E0     |
| Annotation Cluster 4     |                    |                                                              |    |  | Count | P_Value | Benjamini |
| <input type="checkbox"/> | INTERPRO           | <a href="#">Chaperonin TCP-1, conserved site</a>             | RT |  | 8     | 2.0E-1  | 1.0E0     |
| <input type="checkbox"/> | INTERPRO           | <a href="#">Chaperonin Cpn60/TCP-1</a>                       | RT |  | 8     | 2.0E-1  | 1.0E0     |
| <input type="checkbox"/> | SP_PIR_KEYWORDS    | <a href="#">Chaperone</a>                                    | RT |  | 10    | 2.1E-1  | 1.0E0     |
| <input type="checkbox"/> | INTERPRO           | <a href="#">Chaperone, tailless complex polypeptide 1</a>    | RT |  | 7     | 2.8E-1  | 1.0E0     |
| <input type="checkbox"/> | GOTERM_MF_FAT      | <a href="#">unfolded protein binding</a>                     | RT |  | 15    | 3.0E-1  | 1.0E0     |
| <input type="checkbox"/> | PIR_SUPERFAMILY    | PIRSF002584: molecular chaperone t-complex-type              | RT |  | 7     | 3.2E-1  | 1.0E0     |
| <input type="checkbox"/> | GOTERM_BP_FAT      | <a href="#">protein folding</a>                              | RT |  | 20    | 3.4E-1  | 1.0E0     |
| <input type="checkbox"/> | SP_PIR_KEYWORDS    | <a href="#">cytoplasm</a>                                    | RT |  | 13    | 3.5E-1  | 1.0E0     |
| Annotation Cluster 5     |                    |                                                              |    |  | Count | P_Value | Benjamini |
| <input type="checkbox"/> | INTERPRO           | <a href="#">WD40 repeat, conserved site</a>                  | RT |  | 21    | 1.6E-1  | 1.0E0     |
| <input type="checkbox"/> | INTERPRO           | <a href="#">WD40 repeat, subgroup</a>                        | RT |  | 37    | 2.1E-1  | 1.0E0     |
| <input type="checkbox"/> | INTERPRO           | <a href="#">WD40 repeat 2</a>                                | RT |  | 29    | 2.2E-1  | 1.0E0     |
| <input type="checkbox"/> | INTERPRO           | <a href="#">WD40 repeat</a>                                  | RT |  | 47    | 2.8E-1  | 1.0E0     |
| <input type="checkbox"/> | SMART              | <a href="#">WD40</a>                                         | RT |  | 47    | 3.1E-1  | 1.0E0     |
| <input type="checkbox"/> | INTERPRO           | <a href="#">WD40/YVTN repeat-like</a>                        | RT |  | 45    | 3.5E-1  | 1.0E0     |
| <input type="checkbox"/> | INTERPRO           | <a href="#">WD40 repeat, region</a>                          | RT |  | 30    | 3.7E-1  | 1.0E0     |
| <input type="checkbox"/> | SP_PIR_KEYWORDS    | <a href="#">wd repeat</a>                                    | RT |  | 31    | 4.4E-1  | 1.0E0     |
| Annotation Cluster 6     |                    |                                                              |    |  | Count | P_Value | Benjamini |
| <input type="checkbox"/> | GOTERM_MF_FAT      | <a href="#">protein serine/threonine kinase activity</a>     | RT |  | 69    | 8.7E-2  | 1.0E0     |
| <input type="checkbox"/> | INTERPRO           | <a href="#">Serine/threonine protein kinase, active site</a> | RT |  | 58    | 1.5E-1  | 1.0E0     |
| <input type="checkbox"/> | INTERPRO           | <a href="#">Serine/threonine protein kinase</a>              | RT |  | 36    | 4.2E-1  | 1.0E0     |
| <input type="checkbox"/> | SMART              | <a href="#">S_TKc</a>                                        | RT |  | 36    | 4.5E-1  | 1.0E0     |

|                          |                       |                                                                                                              |    |  | Count | P_Value | Benjamini |
|--------------------------|-----------------------|--------------------------------------------------------------------------------------------------------------|----|--|-------|---------|-----------|
| <input type="checkbox"/> | SP_PIR_KEYWORDS       | <a href="#">serine/threonine-protein kinase</a>                                                              | RT |  | 38    | 4.6E-1  | 1.0E0     |
| <input type="checkbox"/> | INTERPRO              | <a href="#">Protein kinase_ATP binding site</a>                                                              | RT |  | 46    | 7.7E-1  | 1.0E0     |
|                          | Annotation Cluster 7  | Enrichment Score: 0.5                                                                                        |    |  | Count | P_Value | Benjamini |
| <input type="checkbox"/> | GOTERM_BP_FAT         | <a href="#">negative regulation of macromolecule metabolic process</a>                                       | RT |  | 7     | 1.3E-1  | 1.0E0     |
| <input type="checkbox"/> | GOTERM_BP_FAT         | <a href="#">negative regulation of gene expression</a>                                                       | RT |  | 7     | 1.3E-1  | 1.0E0     |
| <input type="checkbox"/> | GOTERM_BP_FAT         | <a href="#">gene silencing</a>                                                                               | RT |  | 7     | 1.3E-1  | 1.0E0     |
| <input type="checkbox"/> | GOTERM_BP_FAT         | <a href="#">protein amino acid deacetylation</a>                                                             | RT |  | 6     | 2.0E-1  | 1.0E0     |
| <input type="checkbox"/> | GOTERM_BP_FAT         | <a href="#">negative regulation of RNA metabolic process</a>                                                 | RT |  | 5     | 3.0E-1  | 1.0E0     |
| <input type="checkbox"/> | GOTERM_BP_FAT         | <a href="#">chromatin silencing</a>                                                                          | RT |  | 5     | 3.0E-1  | 1.0E0     |
| <input type="checkbox"/> | GOTERM_BP_FAT         | <a href="#">negative regulation of cellular biosynthetic process</a>                                         | RT |  | 5     | 3.0E-1  | 1.0E0     |
| <input type="checkbox"/> | GOTERM_BP_FAT         | <a href="#">negative regulation of nitrogen compound metabolic process</a>                                   | RT |  | 5     | 3.0E-1  | 1.0E0     |
| <input type="checkbox"/> | GOTERM_BP_FAT         | <a href="#">negative regulation of biosynthetic process</a>                                                  | RT |  | 5     | 3.0E-1  | 1.0E0     |
| <input type="checkbox"/> | GOTERM_BP_FAT         | <a href="#">regulation of gene expression, epigenetic</a>                                                    | RT |  | 5     | 3.0E-1  | 1.0E0     |
| <input type="checkbox"/> | GOTERM_BP_FAT         | <a href="#">negative regulation of macromolecule biosynthetic process</a>                                    | RT |  | 5     | 3.0E-1  | 1.0E0     |
| <input type="checkbox"/> | GOTERM_BP_FAT         | <a href="#">negative regulation of nucleobase, nucleoside, nucleotide and nucleic acid metabolic process</a> | RT |  | 5     | 3.0E-1  | 1.0E0     |
| <input type="checkbox"/> | GOTERM_BP_FAT         | <a href="#">negative regulation of transcription</a>                                                         | RT |  | 5     | 3.0E-1  | 1.0E0     |
| <input type="checkbox"/> | GOTERM_BP_FAT         | <a href="#">negative regulation of gene expression, epigenetic</a>                                           | RT |  | 5     | 3.0E-1  | 1.0E0     |
| <input type="checkbox"/> | GOTERM_BP_FAT         | <a href="#">negative regulation of transcription, DNA-dependent</a>                                          | RT |  | 5     | 3.0E-1  | 1.0E0     |
| <input type="checkbox"/> | INTERPRO              | <a href="#">NAD-dependent histone deacetylase, silent information regulator Sir2</a>                         | RT |  | 5     | 3.1E-1  | 1.0E0     |
| <input type="checkbox"/> | GOTERM_MF_FAT         | <a href="#">NAD binding</a>                                                                                  | RT |  | 5     | 3.1E-1  | 1.0E0     |
| <input type="checkbox"/> | GOTERM_BP_FAT         | <a href="#">regulation of transcription</a>                                                                  | RT |  | 20    | 4.2E-1  | 1.0E0     |
| <input type="checkbox"/> | GOTERM_MF_FAT         | <a href="#">hydrolase activity, acting on carbon-nitrogen (but not peptide) bonds, in linear amides</a>      | RT |  | 6     | 5.6E-1  | 1.0E0     |
| <input type="checkbox"/> | GOTERM_MF_FAT         | <a href="#">NAD or NADH binding</a>                                                                          | RT |  | 6     | 5.6E-1  | 1.0E0     |
| <input type="checkbox"/> | GOTERM_BP_FAT         | <a href="#">regulation of transcription, DNA-dependent</a>                                                   | RT |  | 8     | 6.1E-1  | 1.0E0     |
| <input type="checkbox"/> | GOTERM_BP_FAT         | <a href="#">regulation of RNA metabolic process</a>                                                          | RT |  | 8     | 6.1E-1  | 1.0E0     |
| <input type="checkbox"/> | GOTERM_MF_FAT         | <a href="#">coenzyme binding</a>                                                                             | RT |  | 13    | 9.0E-1  | 1.0E0     |
|                          | Annotation Cluster 8  | Enrichment Score: 0.45                                                                                       |    |  | Count | P_Value | Benjamini |
| <input type="checkbox"/> | GOTERM_BP_FAT         | <a href="#">cellular response to stress</a>                                                                  | RT |  | 15    | 2.8E-1  | 1.0E0     |
| <input type="checkbox"/> | GOTERM_BP_FAT         | <a href="#">response to DNA damage stimulus</a>                                                              | RT |  | 14    | 3.4E-1  | 1.0E0     |
| <input type="checkbox"/> | GOTERM_BP_FAT         | <a href="#">DNA repair</a>                                                                                   | RT |  | 14    | 3.4E-1  | 1.0E0     |
| <input type="checkbox"/> | GOTERM_BP_FAT         | <a href="#">DNA metabolic process</a>                                                                        | RT |  | 36    | 4.7E-1  | 1.0E0     |
|                          | Annotation Cluster 9  | Enrichment Score: 0.44                                                                                       |    |  | Count | P_Value | Benjamini |
| <input type="checkbox"/> | SP_PIR_KEYWORDS       | <a href="#">ubiquitin conjugation pathway</a>                                                                | RT |  | 11    | 1.5E-1  | 1.0E0     |
| <input type="checkbox"/> | GOTERM_BP_FAT         | <a href="#">modification-dependent macromolecule catabolic process</a>                                       | RT |  | 19    | 1.6E-1  | 1.0E0     |
| <input type="checkbox"/> | GOTERM_BP_FAT         | <a href="#">modification-dependent protein catabolic process</a>                                             | RT |  | 19    | 1.6E-1  | 1.0E0     |
| <input type="checkbox"/> | GOTERM_BP_FAT         | <a href="#">proteolysis involved in cellular protein catabolic process</a>                                   | RT |  | 23    | 2.0E-1  | 1.0E0     |
| <input type="checkbox"/> | GOTERM_BP_FAT         | <a href="#">cellular protein catabolic process</a>                                                           | RT |  | 23    | 2.0E-1  | 1.0E0     |
| <input type="checkbox"/> | GOTERM_BP_FAT         | <a href="#">protein catabolic process</a>                                                                    | RT |  | 26    | 2.0E-1  | 1.0E0     |
| <input type="checkbox"/> | GOTERM_BP_FAT         | <a href="#">cellular macromolecule catabolic process</a>                                                     | RT |  | 23    | 2.6E-1  | 1.0E0     |
| <input type="checkbox"/> | GOTERM_BP_FAT         | <a href="#">macromolecule catabolic process</a>                                                              | RT |  | 26    | 2.7E-1  | 1.0E0     |
| <input type="checkbox"/> | GOTERM_BP_FAT         | <a href="#">proteolysis</a>                                                                                  | RT |  | 55    | 2.9E-1  | 1.0E0     |
| <input type="checkbox"/> | KEGG_PATHWAY          | <a href="#">Ubiquitin mediated proteolysis</a>                                                               | RT |  | 8     | 5.0E-1  | 9.8E-1    |
| <input type="checkbox"/> | PIRS_SUPERFAMILY      | PIRSF001567:ubiquitin-protein ligase E2                                                                      | RT |  | 5     | 5.5E-1  | 1.0E0     |
| <input type="checkbox"/> | INTERPRO              | <a href="#">Ubiquitin-conjugating enzyme, E2</a>                                                             | RT |  | 8     | 6.2E-1  | 1.0E0     |
| <input type="checkbox"/> | INTERPRO              | <a href="#">Ubiquitin-conjugating enzyme/RWD-like</a>                                                        | RT |  | 8     | 6.2E-1  | 1.0E0     |
| <input type="checkbox"/> | SMART                 | <a href="#">UBCc</a>                                                                                         | RT |  | 8     | 6.3E-1  | 1.0E0     |
| <input type="checkbox"/> | GOTERM_BP_FAT         | <a href="#">ubiquitin-dependent protein catabolic process</a>                                                | RT |  | 9     | 6.3E-1  | 1.0E0     |
| <input type="checkbox"/> | GOTERM_MF_FAT         | <a href="#">acid-amino acid ligase activity</a>                                                              | RT |  | 16    | 7.0E-1  | 1.0E0     |
| <input type="checkbox"/> | GOTERM_MF_FAT         | <a href="#">small conjugating protein ligase activity</a>                                                    | RT |  | 8     | 7.4E-1  | 1.0E0     |
| <input type="checkbox"/> | GOTERM_MF_FAT         | <a href="#">ligase activity, forming carbon-nitrogen bonds</a>                                               | RT |  | 17    | 8.8E-1  | 1.0E0     |
|                          | Annotation Cluster 10 | Enrichment Score: 0.43                                                                                       |    |  | Count | P_Value | Benjamini |
| <input type="checkbox"/> | INTERPRO              | <a href="#">Ankyrin</a>                                                                                      | RT |  | 260   | 2.6E-1  | 1.0E0     |
| <input type="checkbox"/> | SMART                 | <a href="#">ANK</a>                                                                                          | RT |  | 260   | 3.3E-1  | 1.0E0     |

| <input type="checkbox"/> | SP_PIR_KEYWORDS       | <a href="#">ank repeat</a>                                                                                                   | RT |  | 180   | 6.0E-1  | 1.0EO     |
|--------------------------|-----------------------|------------------------------------------------------------------------------------------------------------------------------|----|--|-------|---------|-----------|
|                          | Annotation Cluster 11 | Enrichment Score: 0.4                                                                                                        |    |  | Count | P_Value | Benjamini |
| <input type="checkbox"/> | KEGG_PATHWAY          | <a href="#">Nucleotide excision repair</a>                                                                                   | RT |  | 12    | 2.9E-1  | 1.0EO     |
| <input type="checkbox"/> | KEGG_PATHWAY          | <a href="#">Mismatch repair</a>                                                                                              | RT |  | 10    | 4.5E-1  | 1.0EO     |
| <input type="checkbox"/> | KEGG_PATHWAY          | <a href="#">DNA replication</a>                                                                                              | RT |  | 14    | 4.8E-1  | 9.9E-1    |
|                          | Annotation Cluster 12 | Enrichment Score: 0.39                                                                                                       |    |  | Count | P_Value | Benjamini |
| <input type="checkbox"/> | GOTERM_MF_FAT         | <a href="#">small GTPase regulator activity</a>                                                                              | RT |  | 9     | 2.6E-1  | 1.0EO     |
| <input type="checkbox"/> | GOTERM_MF_FAT         | <a href="#">GTPase regulator activity</a>                                                                                    | RT |  | 9     | 2.6E-1  | 1.0EO     |
| <input type="checkbox"/> | GOTERM_BP_FAT         | <a href="#">regulation of GTPase activity</a>                                                                                | RT |  | 7     | 2.7E-1  | 1.0EO     |
| <input type="checkbox"/> | GOTERM_BP_FAT         | <a href="#">regulation of hydrolase activity</a>                                                                             | RT |  | 7     | 2.7E-1  | 1.0EO     |
| <input type="checkbox"/> | GOTERM_MF_FAT         | <a href="#">nucleoside-triphosphatase regulator activity</a>                                                                 | RT |  | 10    | 3.1E-1  | 1.0EO     |
| <input type="checkbox"/> | GOTERM_BP_FAT         | <a href="#">regulation of Ras GTPase activity</a>                                                                            | RT |  | 6     | 3.8E-1  | 1.0EO     |
| <input type="checkbox"/> | GOTERM_MF_FAT         | <a href="#">GTPase activator activity</a>                                                                                    | RT |  | 6     | 3.9E-1  | 1.0EO     |
| <input type="checkbox"/> | GOTERM_BP_FAT         | <a href="#">regulation of Ras protein signal transduction</a>                                                                | RT |  | 7     | 4.3E-1  | 1.0EO     |
| <input type="checkbox"/> | GOTERM_BP_FAT         | <a href="#">regulation of small GTPase mediated signal transduction</a>                                                      | RT |  | 7     | 4.3E-1  | 1.0EO     |
| <input type="checkbox"/> | GOTERM_BP_FAT         | <a href="#">regulation of Rab GTPase activity</a>                                                                            | RT |  | 4     | 4.4E-1  | 1.0EO     |
| <input type="checkbox"/> | GOTERM_BP_FAT         | <a href="#">regulation of Rab protein signal transduction</a>                                                                | RT |  | 4     | 4.4E-1  | 1.0EO     |
| <input type="checkbox"/> | GOTERM_MF_FAT         | <a href="#">enzyme activator activity</a>                                                                                    | RT |  | 7     | 4.5E-1  | 1.0EO     |
| <input type="checkbox"/> | GOTERM_MF_FAT         | <a href="#">Rab GTPase activator activity</a>                                                                                | RT |  | 4     | 4.5E-1  | 1.0EO     |
| <input type="checkbox"/> | GOTERM_MF_FAT         | <a href="#">Ras GTPase activator activity</a>                                                                                | RT |  | 4     | 4.5E-1  | 1.0EO     |
| <input type="checkbox"/> | INTERPRO              | <a href="#">RabGAP/TBC</a>                                                                                                   | RT |  | 3     | 6.2E-1  | 1.0EO     |
| <input type="checkbox"/> | SMART                 | <a href="#">TBC</a>                                                                                                          | RT |  | 3     | 6.3E-1  | 1.0EO     |
| <input type="checkbox"/> | GOTERM_BP_FAT         | <a href="#">regulation of ARF protein signal transduction</a>                                                                | RT |  | 3     | 9.0E-1  | 1.0EO     |
|                          | Annotation Cluster 13 | Enrichment Score: 0.37                                                                                                       |    |  | Count | P_Value | Benjamini |
| <input type="checkbox"/> | GOTERM_MF_FAT         | <a href="#">endonuclease activity, active with either ribo- or deoxyribonucleic acids and producing 5'-phosphomonoesters</a> | RT |  | 7     | 1.4E-1  | 1.0EO     |
| <input type="checkbox"/> | GOTERM_MF_FAT         | <a href="#">endoribonuclease activity, producing 5'-phosphomonoesters</a>                                                    | RT |  | 4     | 4.5E-1  | 1.0EO     |
| <input type="checkbox"/> | GOTERM_MF_FAT         | <a href="#">endoribonuclease activity</a>                                                                                    | RT |  | 4     | 6.6E-1  | 1.0EO     |
| <input type="checkbox"/> | GOTERM_MF_FAT         | <a href="#">ribonuclease activity</a>                                                                                        | RT |  | 6     | 8.1E-1  | 1.0EO     |
|                          | Annotation Cluster 14 | Enrichment Score: 0.35                                                                                                       |    |  | Count | P_Value | Benjamini |
| <input type="checkbox"/> | INTERPRO              | <a href="#">Alcohol dehydrogenase, iron-type</a>                                                                             | RT |  | 5     | 3.1E-1  | 1.0EO     |
| <input type="checkbox"/> | COG_ONTOLOGY          | <a href="#">Energy production and conversion</a>                                                                             | RT |  | 7     | 4.6E-1  | 1.0EO     |
| <input type="checkbox"/> | PIRSF000113           | <a href="#">iron-containing alcohol dehydrogenase</a>                                                                        | RT |  | 3     | 6.5E-1  | 1.0EO     |
|                          | Annotation Cluster 15 | Enrichment Score: 0.32                                                                                                       |    |  | Count | P_Value | Benjamini |
| <input type="checkbox"/> | GOTERM_MF_FAT         | <a href="#">vitamin binding</a>                                                                                              | RT |  | 9     | 2.6E-1  | 1.0EO     |
| <input type="checkbox"/> | GOTERM_MF_FAT         | <a href="#">vitamin B6 binding</a>                                                                                           | RT |  | 8     | 3.5E-1  | 1.0EO     |
| <input type="checkbox"/> | GOTERM_MF_FAT         | <a href="#">pyridoxal phosphate binding</a>                                                                                  | RT |  | 8     | 3.5E-1  | 1.0EO     |
| <input type="checkbox"/> | GOTERM_MF_FAT         | <a href="#">transferase activity, transferring nitrogenous groups</a>                                                        | RT |  | 6     | 3.9E-1  | 1.0EO     |
| <input type="checkbox"/> | INTERPRO              | <a href="#">Pyridoxal phosphate-dependent transferase, major region, subdomain 1</a>                                         | RT |  | 6     | 5.5E-1  | 1.0EO     |
| <input type="checkbox"/> | GOTERM_MF_FAT         | <a href="#">cofactor binding</a>                                                                                             | RT |  | 21    | 6.4E-1  | 1.0EO     |
| <input type="checkbox"/> | INTERPRO              | <a href="#">Aminotransferase, class I and II</a>                                                                             | RT |  | 4     | 6.5E-1  | 1.0EO     |
| <input type="checkbox"/> | GOTERM_MF_FAT         | <a href="#">transaminase activity</a>                                                                                        | RT |  | 4     | 6.6E-1  | 1.0EO     |
| <input type="checkbox"/> | SP_PIR_KEYWORDS       | <a href="#">Aminotransferase</a>                                                                                             | RT |  | 4     | 6.7E-1  | 1.0EO     |
|                          | Annotation Cluster 16 | Enrichment Score: 0.31                                                                                                       |    |  | Count | P_Value | Benjamini |
| <input type="checkbox"/> | GOTERM_MF_FAT         | <a href="#">RNA polymerase activity</a>                                                                                      | RT |  | 17    | 2.8E-1  | 1.0EO     |
| <input type="checkbox"/> | GOTERM_MF_FAT         | <a href="#">DNA-directed RNA polymerase activity</a>                                                                         | RT |  | 16    | 3.4E-1  | 1.0EO     |
| <input type="checkbox"/> | KEGG_PATHWAY          | <a href="#">RNA polymerase</a>                                                                                               | RT |  | 13    | 3.4E-1  | 1.0EO     |
| <input type="checkbox"/> | GOTERM_BP_FAT         | <a href="#">transcription</a>                                                                                                | RT |  | 17    | 4.3E-1  | 1.0EO     |
| <input type="checkbox"/> | KEGG_PATHWAY          | <a href="#">Purine metabolism</a>                                                                                            | RT |  | 20    | 5.6E-1  | 9.8E-1    |
| <input type="checkbox"/> | SP_PIR_KEYWORDS       | <a href="#">nucleotidyltransferase</a>                                                                                       | RT |  | 15    | 7.0E-1  | 9.9E-1    |
| <input type="checkbox"/> | KEGG_PATHWAY          | <a href="#">Pyrimidine metabolism</a>                                                                                        | RT |  | 19    | 7.7E-1  | 9.9E-1    |
| <input type="checkbox"/> | SP_PIR_KEYWORDS       | <a href="#">dna-directed rna polymerase</a>                                                                                  | RT |  | 8     | 8.3E-1  | 9.9E-1    |
|                          | Annotation Cluster 17 | Enrichment Score: 0.29                                                                                                       |    |  | Count | P_Value | Benjamini |
| <input type="checkbox"/> | INTERPRO              | <a href="#">Small GTP-binding protein</a>                                                                                    | RT |  | 15    | 2.0E-1  | 1.0EO     |
| <input type="checkbox"/> | INTERPRO              | <a href="#">Ras</a>                                                                                                          | RT |  | 9     | 3.9E-1  | 1.0EO     |
| <input type="checkbox"/> | GOTERM_BP_FAT         | <a href="#">intracellular signaling cascade</a>                                                                              | RT |  | 14    | 4.5E-1  | 1.0EO     |
| <input type="checkbox"/> | GOTERM_MF_FAT         | <a href="#">guanyl nucleotide binding</a>                                                                                    | RT |  | 30    | 4.6E-1  | 1.0EO     |
| <input type="checkbox"/> | GOTERM_MF_FAT         | <a href="#">GTP binding</a>                                                                                                  | RT |  | 30    | 4.6E-1  | 1.0EO     |

| <input type="checkbox"/> |                       |                                                                                                                             |    |  |  |  |  |       |         |           |
|--------------------------|-----------------------|-----------------------------------------------------------------------------------------------------------------------------|----|--|--|--|--|-------|---------|-----------|
| <input type="checkbox"/> | GOTERM_MF_FAT         | <a href="#">guanyl ribonucleotide binding</a>                                                                               | RT |  |  |  |  | 30    | 4.6E-1  | 1.0EO     |
| <input type="checkbox"/> | SP_PIR_KEYWORDS       | <a href="#">gtp-binding</a>                                                                                                 | RT |  |  |  |  | 25    | 5.2E-1  | 1.0EO     |
| <input type="checkbox"/> | GOTERM_BP_FAT         | <a href="#">small GTPase mediated signal transduction</a>                                                                   | RT |  |  |  |  | 10    | 6.6E-1  | 1.0EO     |
| <input type="checkbox"/> | INTERPRO              | <a href="#">Ras GTPase</a>                                                                                                  | RT |  |  |  |  | 8     | 7.3E-1  | 1.0EO     |
| <input type="checkbox"/> | GOTERM_MF_FAT         | <a href="#">GTPase activity</a>                                                                                             | RT |  |  |  |  | 10    | 7.7E-1  | 1.0EO     |
| <input type="checkbox"/> | PIR_SUPERFAMILY       | PIRSF001710:Ras-related protein Rab                                                                                         | RT |  |  |  |  | 3     | 9.6E-1  | 1.0EO     |
|                          | Annotation Cluster 18 | Enrichment Score: 0.28                                                                                                      |    |  |  |  |  | Count | P_Value | Benjamini |
| <input type="checkbox"/> | GOTERM_MF_FAT         | <a href="#">thiolester hydrolase activity</a>                                                                               | RT |  |  |  |  | 7     | 2.9E-1  | 1.0EO     |
| <input type="checkbox"/> | INTERPRO              | <a href="#">Peptidase C19_ubiquitin carboxyl-terminal hydrolase 2</a>                                                       | RT |  |  |  |  | 5     | 5.1E-1  | 1.0EO     |
| <input type="checkbox"/> | GOTERM_MF_FAT         | <a href="#">ubiquitin thiolesterase activity</a>                                                                            | RT |  |  |  |  | 5     | 5.2E-1  | 1.0EO     |
| <input type="checkbox"/> | GOTERM_BP_FAT         | <a href="#">ubiquitin-dependent protein catabolic process</a>                                                               | RT |  |  |  |  | 9     | 6.3E-1  | 1.0EO     |
| <input type="checkbox"/> | INTERPRO              | <a href="#">Peptidase C19_ubiquitin carboxyl-terminal hydrolase 2_conserved site</a>                                        | RT |  |  |  |  | 3     | 8.0E-1  | 1.0EO     |
|                          | Annotation Cluster 19 | Enrichment Score: 0.28                                                                                                      |    |  |  |  |  | Count | P_Value | Benjamini |
| <input type="checkbox"/> | GOTERM_MF_FAT         | <a href="#">endonuclease activity_active with either ribo- or deoxyribonucleic acids and producing 5'-phosphomonoesters</a> | RT |  |  |  |  | 7     | 1.4E-1  | 1.0EO     |
| <input type="checkbox"/> | INTERPRO              | <a href="#">Deoxyribonuclease_TatD Mg-dependent</a>                                                                         | RT |  |  |  |  | 3     | 6.2E-1  | 1.0EO     |
| <input type="checkbox"/> | INTERPRO              | <a href="#">Deoxyribonuclease_TatD-related</a>                                                                              | RT |  |  |  |  | 3     | 6.2E-1  | 1.0EO     |
| <input type="checkbox"/> | INTERPRO              | <a href="#">Deoxyribonuclease_TatD</a>                                                                                      | RT |  |  |  |  | 3     | 6.2E-1  | 1.0EO     |
| <input type="checkbox"/> | GOTERM_MF_FAT         | <a href="#">deoxyribonuclease activity</a>                                                                                  | RT |  |  |  |  | 3     | 6.3E-1  | 1.0EO     |
| <input type="checkbox"/> | GOTERM_MF_FAT         | <a href="#">endodeoxyribonuclease activity_producing 5'-phosphomonoesters</a>                                               | RT |  |  |  |  | 3     | 6.3E-1  | 1.0EO     |
| <input type="checkbox"/> | GOTERM_MF_FAT         | <a href="#">endodeoxyribonuclease activity</a>                                                                              | RT |  |  |  |  | 3     | 6.3E-1  | 1.0EO     |
| <input type="checkbox"/> | PIR_SUPERFAMILY       | PIRSF005902:DNase_TatD                                                                                                      | RT |  |  |  |  | 3     | 6.5E-1  | 1.0EO     |
|                          | Annotation Cluster 20 | Enrichment Score: 0.27                                                                                                      |    |  |  |  |  | Count | P_Value | Benjamini |
| <input type="checkbox"/> | GOTERM_MF_FAT         | <a href="#">protein serine/threonine kinase activity</a>                                                                    | RT |  |  |  |  | 69    | 8.7E-2  | 1.0EO     |
| <input type="checkbox"/> | INTERPRO              | <a href="#">Serine/threonine protein kinase_active site</a>                                                                 | RT |  |  |  |  | 58    | 1.5E-1  | 1.0EO     |
| <input type="checkbox"/> | INTERPRO              | <a href="#">Serine/threonine protein kinase-related</a>                                                                     | RT |  |  |  |  | 137   | 4.7E-1  | 1.0EO     |
| <input type="checkbox"/> | GOTERM_BP_FAT         | <a href="#">phosphorus metabolic process</a>                                                                                | RT |  |  |  |  | 177   | 4.7E-1  | 1.0EO     |
| <input type="checkbox"/> | GOTERM_BP_FAT         | <a href="#">phosphate metabolic process</a>                                                                                 | RT |  |  |  |  | 177   | 4.7E-1  | 1.0EO     |
| <input type="checkbox"/> | SP_PIR_KEYWORDS       | <a href="#">nucleotide-binding</a>                                                                                          | RT |  |  |  |  | 161   | 4.8E-1  | 1.0EO     |
| <input type="checkbox"/> | GOTERM_BP_FAT         | <a href="#">phosphorylation</a>                                                                                             | RT |  |  |  |  | 167   | 5.1E-1  | 1.0EO     |
| <input type="checkbox"/> | SP_PIR_KEYWORDS       | <a href="#">atp-binding</a>                                                                                                 | RT |  |  |  |  | 152   | 5.5E-1  | 1.0EO     |
| <input type="checkbox"/> | GOTERM_BP_FAT         | <a href="#">protein amino acid phosphorylation</a>                                                                          | RT |  |  |  |  | 155   | 5.7E-1  | 1.0EO     |
| <input type="checkbox"/> | INTERPRO              | <a href="#">Protein kinase_core</a>                                                                                         | RT |  |  |  |  | 153   | 6.3E-1  | 1.0EO     |
| <input type="checkbox"/> | GOTERM_MF_FAT         | <a href="#">purine ribonucleotide binding</a>                                                                               | RT |  |  |  |  | 332   | 6.5E-1  | 1.0EO     |
| <input type="checkbox"/> | GOTERM_MF_FAT         | <a href="#">ribonucleotide binding</a>                                                                                      | RT |  |  |  |  | 332   | 6.5E-1  | 1.0EO     |
| <input type="checkbox"/> | GOTERM_MF_FAT         | <a href="#">protein kinase activity</a>                                                                                     | RT |  |  |  |  | 156   | 6.7E-1  | 1.0EO     |
| <input type="checkbox"/> | GOTERM_MF_FAT         | <a href="#">purine nucleotide binding</a>                                                                                   | RT |  |  |  |  | 335   | 7.0E-1  | 1.0EO     |
| <input type="checkbox"/> | SP_PIR_KEYWORDS       | <a href="#">kinase</a>                                                                                                      | RT |  |  |  |  | 191   | 7.2E-1  | 9.9E-1    |
| <input type="checkbox"/> | GOTERM_MF_FAT         | <a href="#">ATP binding</a>                                                                                                 | RT |  |  |  |  | 302   | 7.2E-1  | 1.0EO     |
| <input type="checkbox"/> | GOTERM_MF_FAT         | <a href="#">adenyl ribonucleotide binding</a>                                                                               | RT |  |  |  |  | 302   | 7.2E-1  | 1.0EO     |
| <input type="checkbox"/> | GOTERM_MF_FAT         | <a href="#">nucleotide binding</a>                                                                                          | RT |  |  |  |  | 354   | 7.6E-1  | 1.0EO     |
| <input type="checkbox"/> | GOTERM_MF_FAT         | <a href="#">purine nucleoside binding</a>                                                                                   | RT |  |  |  |  | 305   | 7.6E-1  | 1.0EO     |
| <input type="checkbox"/> | GOTERM_MF_FAT         | <a href="#">adenyl nucleotide binding</a>                                                                                   | RT |  |  |  |  | 305   | 7.6E-1  | 1.0EO     |
| <input type="checkbox"/> | GOTERM_MF_FAT         | <a href="#">nucleoside binding</a>                                                                                          | RT |  |  |  |  | 306   | 8.1E-1  | 1.0EO     |
|                          | Annotation Cluster 21 | Enrichment Score: 0.26                                                                                                      |    |  |  |  |  | Count | P_Value | Benjamini |
| <input type="checkbox"/> | INTERPRO              | <a href="#">Ribosomal protein L7A/RS6 family</a>                                                                            | RT |  |  |  |  | 4     | 4.4E-1  | 1.0EO     |
| <input type="checkbox"/> | INTERPRO              | <a href="#">Ribosomal protein L7Ae/L30e/S12e/Gadd45</a>                                                                     | RT |  |  |  |  | 5     | 5.1E-1  | 1.0EO     |
| <input type="checkbox"/> | INTERPRO              | <a href="#">High mobility group-like nuclear protein</a>                                                                    | RT |  |  |  |  | 3     | 6.2E-1  | 1.0EO     |
| <input type="checkbox"/> | PIR_SUPERFAMILY       | PIRSF002165:ribosomal protein, L7Ab/L7Aa/L7Ae/L8e types/H/ACA ribonucleoprotein complex, NHP2 subunit                       | RT |  |  |  |  | 3     | 6.5E-1  | 1.0EO     |
|                          | Annotation Cluster 22 | Enrichment Score: 0.24                                                                                                      |    |  |  |  |  | Count | P_Value | Benjamini |
| <input type="checkbox"/> | INTERPRO              | <a href="#">Dual specificity phosphatase_catalytic domain</a>                                                               | RT |  |  |  |  | 5     | 3.1E-1  | 1.0EO     |
| <input type="checkbox"/> | INTERPRO              | <a href="#">Protein-tyrosine phosphatase_dual specificity</a>                                                               | RT |  |  |  |  | 5     | 3.1E-1  | 1.0EO     |
| <input type="checkbox"/> | GOTERM_MF_FAT         | <a href="#">protein tyrosine/serine/threonine phosphatase activity</a>                                                      | RT |  |  |  |  | 5     | 3.1E-1  | 1.0EO     |
| <input type="checkbox"/> | GOTERM_BP_FAT         | <a href="#">protein amino acid dephosphorylation</a>                                                                        | RT |  |  |  |  | 9     | 5.1E-1  | 1.0EO     |
| <input type="checkbox"/> | GOTERM_BP_FAT         | <a href="#">dephosphorylation</a>                                                                                           | RT |  |  |  |  | 10    | 6.6E-1  | 1.0EO     |



|                          |                       |                                                                             |    |  |       |         |           |
|--------------------------|-----------------------|-----------------------------------------------------------------------------|----|--|-------|---------|-----------|
| <input type="checkbox"/> | GOTERM_MF_FAT         | <a href="#">protein tyrosine phosphatase activity</a>                       | RT |  | 4     | 8.9E-1  | 1.0E0     |
| <input type="checkbox"/> | INTERPRO              | <a href="#">Dual-specific/protein-tyrosine phosphatase conserved region</a> | RT |  | 3     | 9.0E-1  | 1.0E0     |
| <input type="checkbox"/> | INTERPRO              | <a href="#">Protein-tyrosine phosphatase</a>                                | RT |  | 3     | 9.0E-1  | 1.0E0     |
| <input type="checkbox"/> | INTERPRO              | <a href="#">Protein-tyrosine phosphatase active site</a>                    | RT |  | 3     | 9.5E-1  | 1.0E0     |
|                          | Annotation Cluster 23 | Enrichment Score: 0.24                                                      |    |  | Count | P_Value | Benjamini |
| <input type="checkbox"/> | GOTERM_MF_FAT         | <a href="#">transcription regulator activity</a>                            | RT |  | 8     | 4.9E-1  | 1.0E0     |
| <input type="checkbox"/> | INTERPRO              | <a href="#">Zinc finger, TFIIIS-type</a>                                    | RT |  | 3     | 6.2E-1  | 1.0E0     |
| <input type="checkbox"/> | SMART                 | <a href="#">ZnF_C2C2</a>                                                    | RT |  | 3     | 6.3E-1  | 1.0E0     |
|                          | Annotation Cluster 24 | Enrichment Score: 0.24                                                      |    |  | Count | P_Value | Benjamini |
| <input type="checkbox"/> | COG_ONTOLOGY          | <a href="#">Defense mechanisms</a>                                          | RT |  | 15    | 4.2E-1  | 1.0E0     |
| <input type="checkbox"/> | INTERPRO              | <a href="#">ABC transporter-like</a>                                        | RT |  | 14    | 6.5E-1  | 1.0E0     |
| <input type="checkbox"/> | INTERPRO              | <a href="#">ABC transporter conserved site</a>                              | RT |  | 13    | 7.2E-1  | 1.0E0     |
|                          | Annotation Cluster 25 | Enrichment Score: 0.24                                                      |    |  | Count | P_Value | Benjamini |
| <input type="checkbox"/> | SP_PIR_KEYWORDS       | <a href="#">Acyltransferase</a>                                             | RT |  | 9     | 2.8E-1  | 1.0E0     |
| <input type="checkbox"/> | GOTERM_MF_FAT         | <a href="#">acetyltransferase activity</a>                                  | RT |  | 7     | 6.0E-1  | 1.0E0     |
| <input type="checkbox"/> | GOTERM_MF_FAT         | <a href="#">N-acetyltransferase activity</a>                                | RT |  | 7     | 6.0E-1  | 1.0E0     |
| <input type="checkbox"/> | INTERPRO              | <a href="#">GCN5-related N-acetyltransferase</a>                            | RT |  | 6     | 6.9E-1  | 1.0E0     |
| <input type="checkbox"/> | GOTERM_MF_FAT         | <a href="#">N-acetyltransferase activity</a>                                | RT |  | 6     | 7.0E-1  | 1.0E0     |
| <input type="checkbox"/> | INTERPRO              | <a href="#">Acyl-CoA N-acyltransferase</a>                                  | RT |  | 6     | 8.0E-1  | 1.0E0     |
|                          | Annotation Cluster 26 | Enrichment Score: 0.23                                                      |    |  | Count | P_Value | Benjamini |
| <input type="checkbox"/> | GOTERM_CC_FAT         | <a href="#">pore complex</a>                                                | RT |  | 4     | 5.7E-1  | 1.0E0     |
| <input type="checkbox"/> | GOTERM_CC_FAT         | <a href="#">nuclear pore</a>                                                | RT |  | 4     | 5.7E-1  | 1.0E0     |
| <input type="checkbox"/> | GOTERM_CC_FAT         | <a href="#">nuclear envelope</a>                                            | RT |  | 4     | 5.7E-1  | 1.0E0     |
| <input type="checkbox"/> | GOTERM_CC_FAT         | <a href="#">envelope</a>                                                    | RT |  | 4     | 5.7E-1  | 1.0E0     |
| <input type="checkbox"/> | GOTERM_CC_FAT         | <a href="#">organelle envelope</a>                                          | RT |  | 4     | 5.7E-1  | 1.0E0     |
| <input type="checkbox"/> | GOTERM_CC_FAT         | <a href="#">endomembrane system</a>                                         | RT |  | 9     | 7.1E-1  | 1.0E0     |
|                          | Annotation Cluster 27 | Enrichment Score: 0.23                                                      |    |  | Count | P_Value | Benjamini |
| <input type="checkbox"/> | GOTERM_CC_FAT         | <a href="#">ribosome</a>                                                    | RT |  | 44    | 2.8E-1  | 1.0E0     |
| <input type="checkbox"/> | GOTERM_CC_FAT         | <a href="#">ribonucleoprotein complex</a>                                   | RT |  | 55    | 4.7E-1  | 1.0E0     |
| <input type="checkbox"/> | GOTERM_BP_FAT         | <a href="#">translation</a>                                                 | RT |  | 66    | 5.3E-1  | 1.0E0     |
| <input type="checkbox"/> | KEGG_PATHWAY          | <a href="#">Ribosome</a>                                                    | RT |  | 40    | 6.7E-1  | 9.8E-1    |
| <input type="checkbox"/> | GOTERM_MF_FAT         | <a href="#">structural constituent of ribosome</a>                          | RT |  | 40    | 6.9E-1  | 1.0E0     |
| <input type="checkbox"/> | GOTERM_CC_FAT         | <a href="#">non-membrane-bounded organelle</a>                              | RT |  | 84    | 7.0E-1  | 1.0E0     |
| <input type="checkbox"/> | GOTERM_CC_FAT         | <a href="#">intracellular non-membrane-bounded organelle</a>                | RT |  | 84    | 7.0E-1  | 1.0E0     |
| <input type="checkbox"/> | SP_PIR_KEYWORDS       | <a href="#">ribosomal protein</a>                                           | RT |  | 42    | 7.0E-1  | 9.9E-1    |
| <input type="checkbox"/> | GOTERM_MF_FAT         | <a href="#">structural molecule activity</a>                                | RT |  | 46    | 8.3E-1  | 1.0E0     |
|                          | Annotation Cluster 28 | Enrichment Score: 0.22                                                      |    |  | Count | P_Value | Benjamini |
| <input type="checkbox"/> | GOTERM_BP_FAT         | <a href="#">coenzyme metabolic process</a>                                  | RT |  | 8     | 3.3E-1  | 1.0E0     |
| <input type="checkbox"/> | GOTERM_BP_FAT         | <a href="#">coenzyme biosynthetic process</a>                               | RT |  | 6     | 3.8E-1  | 1.0E0     |
| <input type="checkbox"/> | GOTERM_BP_FAT         | <a href="#">cofactor metabolic process</a>                                  | RT |  | 9     | 3.8E-1  | 1.0E0     |
| <input type="checkbox"/> | GOTERM_BP_FAT         | <a href="#">cofactor biosynthetic process</a>                               | RT |  | 7     | 4.3E-1  | 1.0E0     |
| <input type="checkbox"/> | GOTERM_BP_FAT         | <a href="#">pyridine nucleotide metabolic process</a>                       | RT |  | 5     | 5.0E-1  | 1.0E0     |
| <input type="checkbox"/> | GOTERM_BP_FAT         | <a href="#">oxidoreduction coenzyme metabolic process</a>                   | RT |  | 5     | 5.0E-1  | 1.0E0     |
| <input type="checkbox"/> | GOTERM_BP_FAT         | <a href="#">cellular amide metabolic process</a>                            | RT |  | 4     | 6.5E-1  | 1.0E0     |
| <input type="checkbox"/> | GOTERM_BP_FAT         | <a href="#">nicotinamide metabolic process</a>                              | RT |  | 4     | 6.5E-1  | 1.0E0     |
| <input type="checkbox"/> | GOTERM_BP_FAT         | <a href="#">alkaloid metabolic process</a>                                  | RT |  | 4     | 6.5E-1  | 1.0E0     |
| <input type="checkbox"/> | GOTERM_BP_FAT         | <a href="#">secondary metabolic process</a>                                 | RT |  | 4     | 6.5E-1  | 1.0E0     |
| <input type="checkbox"/> | GOTERM_BP_FAT         | <a href="#">nicotinamide nucleotide metabolic process</a>                   | RT |  | 4     | 6.5E-1  | 1.0E0     |
| <input type="checkbox"/> | GOTERM_BP_FAT         | <a href="#">pyridine nucleotide biosynthetic process</a>                    | RT |  | 3     | 8.0E-1  | 1.0E0     |
| <input type="checkbox"/> | GOTERM_BP_FAT         | <a href="#">water-soluble vitamin metabolic process</a>                     | RT |  | 3     | 9.0E-1  | 1.0E0     |
| <input type="checkbox"/> | GOTERM_BP_FAT         | <a href="#">water-soluble vitamin biosynthetic process</a>                  | RT |  | 3     | 9.0E-1  | 1.0E0     |
| <input type="checkbox"/> | GOTERM_BP_FAT         | <a href="#">vitamin metabolic process</a>                                   | RT |  | 3     | 9.0E-1  | 1.0E0     |
| <input type="checkbox"/> | GOTERM_BP_FAT         | <a href="#">vitamin biosynthetic process</a>                                | RT |  | 3     | 9.0E-1  | 1.0E0     |
|                          | Annotation Cluster 29 | Enrichment Score: 0.22                                                      |    |  | Count | P_Value | Benjamini |
| <input type="checkbox"/> | INTERPRO              | <a href="#">Translation elongation factor EFTu/EF1A domain 2</a>            | RT |  | 5     | 3.1E-1  | 1.0E0     |
| <input type="checkbox"/> | INTERPRO              | <a href="#">Protein synthesis factor, GTP-binding</a>                       | RT |  | 6     | 5.5E-1  | 1.0E0     |
| <input type="checkbox"/> | GOTERM_BP_FAT         | <a href="#">translational elongation</a>                                    | RT |  | 5     | 6.7E-1  | 1.0E0     |
| <input type="checkbox"/> | SP_PIR_KEYWORDS       | <a href="#">elongation factor</a>                                           | RT |  | 5     | 6.9E-1  | 1.0E0     |

| <input type="checkbox"/> | Annotation            | Term                                                                                    | RT |                                                                                     | Count | P_Value | Benjamini |           |
|--------------------------|-----------------------|-----------------------------------------------------------------------------------------|----|-------------------------------------------------------------------------------------|-------|---------|-----------|-----------|
| <input type="checkbox"/> | GOTERM_MF_FAT         | <a href="#">GTPase activity</a>                                                         | RT |                                                                                     | 10    | 7.7E-1  | 1.0E0     |           |
| <input type="checkbox"/> | GOTERM_MF_FAT         | <a href="#">translation elongation factor activity</a>                                  | RT |                                                                                     | 5     | 8.0E-1  | 1.0E0     |           |
|                          | Annotation Cluster 30 | Enrichment Score: 0.2                                                                   |    |    |       | Count   | P_Value   | Benjamini |
| <input type="checkbox"/> | GOTERM_MF_FAT         | <a href="#">translation factor activity, nucleic acid binding</a>                       | RT |                                                                                     | 21    | 4.0E-1  | 1.0E0     |           |
| <input type="checkbox"/> | GOTERM_MF_FAT         | <a href="#">translation initiation factor activity</a>                                  | RT |                                                                                     | 15    | 6.8E-1  | 1.0E0     |           |
| <input type="checkbox"/> | GOTERM_BP_FAT         | <a href="#">translational initiation</a>                                                | RT |                                                                                     | 7     | 7.1E-1  | 1.0E0     |           |
| <input type="checkbox"/> | SP_PIR_KEYWORDS       | <a href="#">Initiation factor</a>                                                       | RT |                                                                                     | 11    | 7.9E-1  | 9.9E-1    |           |
|                          | Annotation Cluster 31 | Enrichment Score: 0.2                                                                   |    |    |       | Count   | P_Value   | Benjamini |
| <input type="checkbox"/> | INTERPRO              | <a href="#">Lecithin</a>                                                                | RT |                                                                                     | 3     | 6.2E-1  | 1.0E0     |           |
| <input type="checkbox"/> | GOTERM_MF_FAT         | <a href="#">phosphatidylcholine-sterol O-acyltransferase activity</a>                   | RT |                                                                                     | 3     | 6.3E-1  | 1.0E0     |           |
| <input type="checkbox"/> | GOTERM_MF_FAT         | <a href="#">O-acyltransferase activity</a>                                              | RT |                                                                                     | 3     | 6.3E-1  | 1.0E0     |           |
|                          | Annotation Cluster 32 | Enrichment Score: 0.2                                                                   |    |    |       | Count   | P_Value   | Benjamini |
| <input type="checkbox"/> | INTERPRO              | <a href="#">Cyclin-related</a>                                                          | RT |                                                                                     | 5     | 5.1E-1  | 1.0E0     |           |
| <input type="checkbox"/> | SP_PIR_KEYWORDS       | <a href="#">cyclin</a>                                                                  | RT |                                                                                     | 7     | 6.1E-1  | 9.9E-1    |           |
| <input type="checkbox"/> | INTERPRO              | <a href="#">Cyclin, N-terminal</a>                                                      | RT |                                                                                     | 4     | 7.9E-1  | 1.0E0     |           |
|                          | Annotation Cluster 33 | Enrichment Score: 0.2                                                                   |    |    |       | Count   | P_Value   | Benjamini |
| <input type="checkbox"/> | GOTERM_MF_FAT         | <a href="#">phosphotransferase activity, for other substituted phosphate groups</a>     | RT |                                                                                     | 4     | 4.5E-1  | 1.0E0     |           |
| <input type="checkbox"/> | GOTERM_BP_FAT         | <a href="#">organophosphate metabolic process</a>                                       | RT |                                                                                     | 9     | 5.1E-1  | 1.0E0     |           |
| <input type="checkbox"/> | GOTERM_BP_FAT         | <a href="#">phospholipid metabolic process</a>                                          | RT |                                                                                     | 8     | 6.1E-1  | 1.0E0     |           |
| <input type="checkbox"/> | INTERPRO              | <a href="#">CDP-alcohol phosphatidyltransferase</a>                                     | RT |                                                                                     | 3     | 6.2E-1  | 1.0E0     |           |
| <input type="checkbox"/> | GOTERM_BP_FAT         | <a href="#">lipid biosynthetic process</a>                                              | RT |                                                                                     | 8     | 8.1E-1  | 1.0E0     |           |
| <input type="checkbox"/> | GOTERM_BP_FAT         | <a href="#">phospholipid biosynthetic process</a>                                       | RT |                                                                                     | 4     | 8.8E-1  | 1.0E0     |           |
|                          | Annotation Cluster 34 | Enrichment Score: 0.19                                                                  |    |    |       | Count   | P_Value   | Benjamini |
| <input type="checkbox"/> | INTERPRO              | <a href="#">Thioredoxin, conserved site</a>                                             | RT |                                                                                     | 6     | 2.1E-1  | 1.0E0     |           |
| <input type="checkbox"/> | INTERPRO              | <a href="#">Thioredoxin-like</a>                                                        | RT |                                                                                     | 9     | 5.2E-1  | 1.0E0     |           |
| <input type="checkbox"/> | INTERPRO              | <a href="#">Thioredoxin-like subdomain</a>                                              | RT |                                                                                     | 4     | 6.5E-1  | 1.0E0     |           |
| <input type="checkbox"/> | GOTERM_MF_FAT         | <a href="#">antioxidant activity</a>                                                    | RT |                                                                                     | 5     | 6.8E-1  | 1.0E0     |           |
| <input type="checkbox"/> | INTERPRO              | <a href="#">Thioredoxin fold</a>                                                        | RT |                                                                                     | 13    | 7.2E-1  | 1.0E0     |           |
| <input type="checkbox"/> | INTERPRO              | <a href="#">Thioredoxin domain</a>                                                      | RT |                                                                                     | 4     | 7.9E-1  | 1.0E0     |           |
| <input type="checkbox"/> | INTERPRO              | <a href="#">Alkyl hydroperoxide reductase/ Thiol specific antioxidant/ Mal allergen</a> | RT |                                                                                     | 4     | 7.9E-1  | 1.0E0     |           |
| <input type="checkbox"/> | GOTERM_BP_FAT         | <a href="#">cell redox homeostasis</a>                                                  | RT |                                                                                     | 10    | 8.2E-1  | 1.0E0     |           |
| <input type="checkbox"/> | GOTERM_BP_FAT         | <a href="#">homeostatic process</a>                                                     | RT |                                                                                     | 11    | 8.3E-1  | 1.0E0     |           |
| <input type="checkbox"/> | GOTERM_BP_FAT         | <a href="#">cellular homeostasis</a>                                                    | RT |                                                                                     | 10    | 8.8E-1  | 1.0E0     |           |
|                          | Annotation Cluster 35 | Enrichment Score: 0.19                                                                  |    |  |       | Count   | P_Value   | Benjamini |
| <input type="checkbox"/> | KEGG_PATHWAY          | <a href="#">Terpenoid backbone biosynthesis</a>                                         | RT |                                                                                     | 5     | 5.2E-1  | 9.8E-1    |           |
| <input type="checkbox"/> | GOTERM_BP_FAT         | <a href="#">isoprenoid biosynthetic process</a>                                         | RT |                                                                                     | 4     | 6.5E-1  | 1.0E0     |           |
| <input type="checkbox"/> | GOTERM_BP_FAT         | <a href="#">isoprenoid metabolic process</a>                                            | RT |                                                                                     | 4     | 6.5E-1  | 1.0E0     |           |
| <input type="checkbox"/> | GOTERM_BP_FAT         | <a href="#">lipid biosynthetic process</a>                                              | RT |                                                                                     | 8     | 8.1E-1  | 1.0E0     |           |
|                          | Annotation Cluster 36 | Enrichment Score: 0.18                                                                  |    |  |       | Count   | P_Value   | Benjamini |
| <input type="checkbox"/> | INTERPRO              | <a href="#">Phox-like</a>                                                               | RT |                                                                                     | 4     | 6.5E-1  | 1.0E0     |           |
| <input type="checkbox"/> | GOTERM_MF_FAT         | <a href="#">phosphoinositide binding</a>                                                | RT |                                                                                     | 4     | 6.6E-1  | 1.0E0     |           |
| <input type="checkbox"/> | SMART                 | <a href="#">PX</a>                                                                      | RT |                                                                                     | 4     | 6.6E-1  | 1.0E0     |           |
|                          | Annotation Cluster 37 | Enrichment Score: 0.18                                                                  |    |  |       | Count   | P_Value   | Benjamini |
| <input type="checkbox"/> | GOTERM_BP_FAT         | <a href="#">intracellular transport</a>                                                 | RT |                                                                                     | 18    | 4.6E-1  | 1.0E0     |           |
| <input type="checkbox"/> | INTERPRO              | <a href="#">Clathrin adaptor, sigma subunit/coatomer, zeta subunit</a>                  | RT |                                                                                     | 3     | 6.2E-1  | 1.0E0     |           |
| <input type="checkbox"/> | GOTERM_BP_FAT         | <a href="#">cellular protein localization</a>                                           | RT |                                                                                     | 14    | 6.4E-1  | 1.0E0     |           |
| <input type="checkbox"/> | GOTERM_BP_FAT         | <a href="#">intracellular protein transport</a>                                         | RT |                                                                                     | 14    | 6.4E-1  | 1.0E0     |           |
| <input type="checkbox"/> | GOTERM_BP_FAT         | <a href="#">cellular macromolecule localization</a>                                     | RT |                                                                                     | 14    | 6.4E-1  | 1.0E0     |           |
| <input type="checkbox"/> | GOTERM_BP_FAT         | <a href="#">protein localization</a>                                                    | RT |                                                                                     | 20    | 6.7E-1  | 1.0E0     |           |
| <input type="checkbox"/> | GOTERM_CC_FAT         | <a href="#">membrane coat</a>                                                           | RT |                                                                                     | 8     | 7.1E-1  | 1.0E0     |           |
| <input type="checkbox"/> | GOTERM_CC_FAT         | <a href="#">coated membrane</a>                                                         | RT |                                                                                     | 8     | 7.1E-1  | 1.0E0     |           |
| <input type="checkbox"/> | GOTERM_BP_FAT         | <a href="#">protein transport</a>                                                       | RT |                                                                                     | 19    | 7.2E-1  | 1.0E0     |           |
| <input type="checkbox"/> | GOTERM_BP_FAT         | <a href="#">establishment of protein localization</a>                                   | RT |                                                                                     | 19    | 7.2E-1  | 1.0E0     |           |
| <input type="checkbox"/> | GOTERM_BP_FAT         | <a href="#">vesicle-mediated transport</a>                                              | RT |                                                                                     | 16    | 8.1E-1  | 1.0E0     |           |
|                          | Annotation Cluster 38 | Enrichment Score: 0.18                                                                  |    |  |       | Count   | P_Value   | Benjamini |
| <input type="checkbox"/> | INTERPRO              | <a href="#">EGF-like, Jaminin</a>                                                       | RT |                                                                                     | 16    | 6.0E-1  | 1.0E0     |           |
| <input type="checkbox"/> | SMART                 | <a href="#">EGF_Lam</a>                                                                 | RT |                                                                                     | 16    | 6.2E-1  | 1.0E0     |           |
| <input type="checkbox"/> | INTERPRO              | <a href="#">EGF-like, type 3</a>                                                        | RT |                                                                                     | 18    | 7.8E-1  | 1.0E0     |           |

| Annotation Cluster 39    |                 | Enrichment Score: 0.18                                                                    |    |  | Count | P_Value | Benjamini |
|--------------------------|-----------------|-------------------------------------------------------------------------------------------|----|--|-------|---------|-----------|
| <input type="checkbox"/> | GOTERM_MF_FAT   | <a href="#">metal ion binding</a>                                                         | RT |  | 154   | 3.0E-1  | 1.0E0     |
| <input type="checkbox"/> | GOTERM_MF_FAT   | <a href="#">ion binding</a>                                                               | RT |  | 154   | 4.0E-1  | 1.0E0     |
| <input type="checkbox"/> | GOTERM_MF_FAT   | <a href="#">cation binding</a>                                                            | RT |  | 154   | 4.0E-1  | 1.0E0     |
| <input type="checkbox"/> | SP_PIR_KEYWORDS | <a href="#">zinc</a>                                                                      | RT |  | 49    | 6.9E-1  | 1.0E0     |
| <input type="checkbox"/> | SP_PIR_KEYWORDS | <a href="#">metal-binding</a>                                                             | RT |  | 57    | 7.8E-1  | 1.0E0     |
| <input type="checkbox"/> | GOTERM_MF_FAT   | <a href="#">transition metal ion binding</a>                                              | RT |  | 106   | 7.9E-1  | 1.0E0     |
| <input type="checkbox"/> | GOTERM_MF_FAT   | <a href="#">zinc ion binding</a>                                                          | RT |  | 85    | 8.1E-1  | 1.0E0     |
| <input type="checkbox"/> | SP_PIR_KEYWORDS | <a href="#">zinc-finger</a>                                                               | RT |  | 34    | 8.3E-1  | 9.9E-1    |
| <input type="checkbox"/> | INTERPRO        | <a href="#">Zinc finger, RING-type</a>                                                    | RT |  | 35    | 9.1E-1  | 1.0E0     |
| <input type="checkbox"/> | SMART           | <a href="#">RING</a>                                                                      | RT |  | 35    | 9.3E-1  | 1.0E0     |
| <input type="checkbox"/> | INTERPRO        | <a href="#">Zinc finger, C3HC4 RING-type</a>                                              | RT |  | 15    | 9.9E-1  | 1.0E0     |
| Annotation Cluster 40    |                 | Enrichment Score: 0.17                                                                    |    |  | Count | P_Value | Benjamini |
| <input type="checkbox"/> | GOTERM_BP_FAT   | <a href="#">lipid transport</a>                                                           | RT |  | 5     | 3.0E-1  | 1.0E0     |
| <input type="checkbox"/> | GOTERM_BP_FAT   | <a href="#">lipid localization</a>                                                        | RT |  | 5     | 3.0E-1  | 1.0E0     |
| <input type="checkbox"/> | GOTERM_CC_FAT   | <a href="#">proton-transporting two-sector ATPase complex, proton-transporting domain</a> | RT |  | 5     | 4.1E-1  | 1.0E0     |
| <input type="checkbox"/> | GOTERM_BP_FAT   | <a href="#">phospholipid transport</a>                                                    | RT |  | 4     | 4.4E-1  | 1.0E0     |
| <input type="checkbox"/> | INTERPRO        | <a href="#">ATPase, P-type, phospholipid-translocating, flippase</a>                      | RT |  | 4     | 4.4E-1  | 1.0E0     |
| <input type="checkbox"/> | GOTERM_MF_FAT   | <a href="#">lipid transporter activity</a>                                                | RT |  | 5     | 5.2E-1  | 1.0E0     |
| <input type="checkbox"/> | GOTERM_BP_FAT   | <a href="#">nucleoside triphosphate metabolic process</a>                                 | RT |  | 17    | 5.3E-1  | 1.0E0     |
| <input type="checkbox"/> | GOTERM_BP_FAT   | <a href="#">purine nucleoside triphosphate metabolic process</a>                          | RT |  | 17    | 5.3E-1  | 1.0E0     |
| <input type="checkbox"/> | GOTERM_BP_FAT   | <a href="#">nucleoside triphosphate biosynthetic process</a>                              | RT |  | 17    | 5.3E-1  | 1.0E0     |
| <input type="checkbox"/> | GOTERM_BP_FAT   | <a href="#">purine ribonucleoside triphosphate metabolic process</a>                      | RT |  | 17    | 5.3E-1  | 1.0E0     |
| <input type="checkbox"/> | GOTERM_BP_FAT   | <a href="#">purine ribonucleoside triphosphate biosynthetic process</a>                   | RT |  | 17    | 5.3E-1  | 1.0E0     |
| <input type="checkbox"/> | GOTERM_BP_FAT   | <a href="#">ribonucleoside triphosphate metabolic process</a>                             | RT |  | 17    | 5.3E-1  | 1.0E0     |
| <input type="checkbox"/> | GOTERM_BP_FAT   | <a href="#">ribonucleoside triphosphate biosynthetic process</a>                          | RT |  | 17    | 5.3E-1  | 1.0E0     |
| <input type="checkbox"/> | GOTERM_BP_FAT   | <a href="#">purine nucleoside triphosphate biosynthetic process</a>                       | RT |  | 17    | 5.3E-1  | 1.0E0     |
| <input type="checkbox"/> | GOTERM_MF_FAT   | <a href="#">magnesium ion binding</a>                                                     | RT |  | 10    | 5.7E-1  | 1.0E0     |
| <input type="checkbox"/> | GOTERM_CC_FAT   | <a href="#">proton-transporting V-type ATPase, VO domain</a>                              | RT |  | 4     | 5.7E-1  | 1.0E0     |
| <input type="checkbox"/> | GOTERM_BP_FAT   | <a href="#">ion transport</a>                                                             | RT |  | 15    | 5.7E-1  | 1.0E0     |
| <input type="checkbox"/> | GOTERM_BP_FAT   | <a href="#">cation transport</a>                                                          | RT |  | 15    | 5.7E-1  | 1.0E0     |
| <input type="checkbox"/> | GOTERM_BP_FAT   | <a href="#">nucleobase, nucleoside and nucleotide biosynthetic process</a>                | RT |  | 25    | 6.1E-1  | 1.0E0     |
| <input type="checkbox"/> | GOTERM_BP_FAT   | <a href="#">nucleobase, nucleoside, nucleotide and nucleic acid biosynthetic process</a>  | RT |  | 25    | 6.1E-1  | 1.0E0     |
| <input type="checkbox"/> | GOTERM_BP_FAT   | <a href="#">purine ribonucleotide biosynthetic process</a>                                | RT |  | 17    | 6.1E-1  | 1.0E0     |
| <input type="checkbox"/> | GOTERM_BP_FAT   | <a href="#">purine ribonucleotide metabolic process</a>                                   | RT |  | 17    | 6.1E-1  | 1.0E0     |
| <input type="checkbox"/> | GOTERM_BP_FAT   | <a href="#">ribonucleotide metabolic process</a>                                          | RT |  | 17    | 6.1E-1  | 1.0E0     |
| <input type="checkbox"/> | GOTERM_BP_FAT   | <a href="#">ribonucleotide biosynthetic process</a>                                       | RT |  | 17    | 6.1E-1  | 1.0E0     |
| <input type="checkbox"/> | GOTERM_CC_FAT   | <a href="#">proton-transporting two-sector ATPase complex</a>                             | RT |  | 9     | 6.2E-1  | 1.0E0     |
| <input type="checkbox"/> | GOTERM_BP_FAT   | <a href="#">transmembrane transport</a>                                                   | RT |  | 13    | 6.2E-1  | 1.0E0     |
| <input type="checkbox"/> | GOTERM_BP_FAT   | <a href="#">ion transmembrane transport</a>                                               | RT |  | 9     | 6.3E-1  | 1.0E0     |
| <input type="checkbox"/> | GOTERM_BP_FAT   | <a href="#">nucleotide biosynthetic process</a>                                           | RT |  | 23    | 6.4E-1  | 1.0E0     |
| <input type="checkbox"/> | GOTERM_BP_FAT   | <a href="#">monovalent inorganic cation transport</a>                                     | RT |  | 10    | 6.6E-1  | 1.0E0     |
| <input type="checkbox"/> | GOTERM_MF_FAT   | <a href="#">phospholipid-translocating ATPase activity</a>                                | RT |  | 4     | 6.6E-1  | 1.0E0     |
| <input type="checkbox"/> | GOTERM_MF_FAT   | <a href="#">phospholipid transporter activity</a>                                         | RT |  | 4     | 6.6E-1  | 1.0E0     |
| <input type="checkbox"/> | GOTERM_MF_FAT   | <a href="#">aminophospholipid transporter activity</a>                                    | RT |  | 4     | 6.6E-1  | 1.0E0     |
| <input type="checkbox"/> | GOTERM_BP_FAT   | <a href="#">ATP metabolic process</a>                                                     | RT |  | 15    | 6.6E-1  | 1.0E0     |
| <input type="checkbox"/> | GOTERM_BP_FAT   | <a href="#">ATP biosynthetic process</a>                                                  | RT |  | 15    | 6.6E-1  | 1.0E0     |
| <input type="checkbox"/> | GOTERM_BP_FAT   | <a href="#">purine nucleotide biosynthetic process</a>                                    | RT |  | 17    | 6.9E-1  | 1.0E0     |
| <input type="checkbox"/> | INTERPRO        | <a href="#">ATPase, P-type, ATPase-associated region</a>                                  | RT |  | 7     | 7.1E-1  | 1.0E0     |
| <input type="checkbox"/> | GOTERM_BP_FAT   | <a href="#">oxidative phosphorylation</a>                                                 | RT |  | 8     | 7.2E-1  | 1.0E0     |
| <input type="checkbox"/> | GOTERM_BP_FAT   | <a href="#">ATP synthesis coupled proton transport</a>                                    | RT |  | 8     | 7.2E-1  | 1.0E0     |
| <input type="checkbox"/> | GOTERM_BP_FAT   | <a href="#">energy coupled proton transport, down electrochemical gradient</a>            | RT |  | 8     | 7.2E-1  | 1.0E0     |
| <input type="checkbox"/> | GOTERM_BP_FAT   | <a href="#">hydrogen transport</a>                                                        | RT |  | 9     | 7.4E-1  | 1.0E0     |
| <input type="checkbox"/> | GOTERM_BP_FAT   | <a href="#">proton transport</a>                                                          | RT |  | 9     | 7.4E-1  | 1.0E0     |

|                          |                       |                                                                                                                |    |  |       |         |           |
|--------------------------|-----------------------|----------------------------------------------------------------------------------------------------------------|----|--|-------|---------|-----------|
| <input type="checkbox"/> | GOTERM_BP_FAT         | <a href="#">generation of precursor metabolites and energy</a>                                                 | RT |  | 15    | 7.4E-1  | 1.0E0     |
| <input type="checkbox"/> | GOTERM_MF_FAT         | <a href="#">hydrogen ion transmembrane transporter activity</a>                                                | RT |  | 9     | 7.5E-1  | 1.0E0     |
| <input type="checkbox"/> | GOTERM_MF_FAT         | <a href="#">monovalent inorganic cation transmembrane transporter activity</a>                                 | RT |  | 9     | 7.5E-1  | 1.0E0     |
| <input type="checkbox"/> | GOTERM_BP_FAT         | <a href="#">purine nucleotide metabolic process</a>                                                            | RT |  | 17    | 7.6E-1  | 1.0E0     |
| <input type="checkbox"/> | INTERPRO              | <a href="#">ATPase, P-type phosphorylation site</a>                                                            | RT |  | 5     | 8.0E-1  | 1.0E0     |
| <input type="checkbox"/> | GOTERM_BP_FAT         | <a href="#">nitrogen compound biosynthetic process</a>                                                         | RT |  | 27    | 8.0E-1  | 1.0E0     |
| <input type="checkbox"/> | INTERPRO              | <a href="#">ATPase, P-type, K/Mg/Cd/Cu/Zn/Na/Ca/Na/H-transporter</a>                                           | RT |  | 7     | 8.1E-1  | 1.0E0     |
| <input type="checkbox"/> | GOTERM_CC_FAT         | <a href="#">proton-transporting V-type ATPase complex</a>                                                      | RT |  | 5     | 8.2E-1  | 1.0E0     |
| <input type="checkbox"/> | GOTERM_MF_FAT         | <a href="#">ATPase activity, coupled to transmembrane movement of ions, phosphorylative mechanism</a>          | RT |  | 7     | 8.2E-1  | 1.0E0     |
| <input type="checkbox"/> | SP_PIR_KEYWORDS       | <a href="#">magnesium</a>                                                                                      | RT |  | 7     | 8.3E-1  | 9.9E-1    |
| <input type="checkbox"/> | GOTERM_MF_FAT         | <a href="#">inorganic cation transmembrane transporter activity</a>                                            | RT |  | 10    | 8.4E-1  | 1.0E0     |
| <input type="checkbox"/> | KEGG_PATHWAY          | <a href="#">Oxidative phosphorylation</a>                                                                      | RT |  | 7     | 8.9E-1  | 9.9E-1    |
| <input type="checkbox"/> | GOTERM_CC_FAT         | <a href="#">proton-transporting two-sector ATPase complex, catalytic domain</a>                                | RT |  | 4     | 9.0E-1  | 1.0E0     |
| <input type="checkbox"/> | SP_PIR_KEYWORDS       | <a href="#">ion transport</a>                                                                                  | RT |  | 3     | 9.1E-1  | 1.0E0     |
| <input type="checkbox"/> | GOTERM_MF_FAT         | <a href="#">ATPase activity, coupled to transmembrane movement of ions</a>                                     | RT |  | 10    | 9.3E-1  | 1.0E0     |
| <input type="checkbox"/> | INTERPRO              | <a href="#">Haloacid dehalogenase-like hydrolase</a>                                                           | RT |  | 5     | 9.3E-1  | 1.0E0     |
| <input type="checkbox"/> | GOTERM_MF_FAT         | <a href="#">ATPase activity, coupled to transmembrane movement of substances</a>                               | RT |  | 13    | 9.7E-1  | 1.0E0     |
| <input type="checkbox"/> | GOTERM_MF_FAT         | <a href="#">ATPase activity, coupled to movement of substances</a>                                             | RT |  | 13    | 9.7E-1  | 1.0E0     |
| <input type="checkbox"/> | GOTERM_MF_FAT         | <a href="#">P-P-bond-hydrolysis-driven transmembrane transporter activity</a>                                  | RT |  | 14    | 9.7E-1  | 1.0E0     |
| <input type="checkbox"/> | GOTERM_MF_FAT         | <a href="#">primary active transmembrane transporter activity</a>                                              | RT |  | 14    | 9.7E-1  | 1.0E0     |
| <input type="checkbox"/> | GOTERM_MF_FAT         | <a href="#">hydrolase activity, acting on acid anhydrides, catalyzing transmembrane movement of substances</a> | RT |  | 14    | 9.7E-1  | 1.0E0     |
| <input type="checkbox"/> | GOTERM_MF_FAT         | <a href="#">proton-transporting ATPase activity, rotational mechanism</a>                                      | RT |  | 3     | 9.8E-1  | 1.0E0     |
| <input type="checkbox"/> | GOTERM_MF_FAT         | <a href="#">cation-transporting ATPase activity</a>                                                            | RT |  | 3     | 1.0E0   | 1.0E0     |
|                          | Annotation Cluster 41 | Enrichment Score: 0.17                                                                                         |    |  | Count | P_Value | Benjamini |
| <input type="checkbox"/> | INTERPRO              | <a href="#">Giardia variant-specific surface protein</a>                                                       | RT |  | 140   | 4.3E-1  | 1.0E0     |
| <input type="checkbox"/> | INTERPRO              | <a href="#">EGF-like</a>                                                                                       | RT |  | 109   | 6.8E-1  | 1.0E0     |
| <input type="checkbox"/> | SMART                 | <a href="#">EGF</a>                                                                                            | RT |  | 109   | 7.4E-1  | 1.0E0     |
| <input type="checkbox"/> | INTERPRO              | <a href="#">Furin-like repeat</a>                                                                              | RT |  | 103   | 8.0E-1  | 1.0E0     |
| <input type="checkbox"/> | SMART                 | <a href="#">FU</a>                                                                                             | RT |  | 103   | 8.5E-1  | 1.0E0     |
|                          | Annotation Cluster 42 | Enrichment Score: 0.16                                                                                         |    |  | Count | P_Value | Benjamini |
| <input type="checkbox"/> | INTERPRO              | <a href="#">Uncharacterised conserved protein UCP036436, nucleotide-sugar transporter-related</a>              | RT |  | 3     | 6.2E-1  | 1.0E0     |
| <input type="checkbox"/> | PIR_SUPERFAMILY       | PIRSF036436:UCP036436                                                                                          | RT |  | 3     | 6.5E-1  | 1.0E0     |
| <input type="checkbox"/> | INTERPRO              | <a href="#">Protein of unknown function DUF6, transmembrane</a>                                                | RT |  | 3     | 8.0E-1  | 1.0E0     |
|                          | Annotation Cluster 43 | Enrichment Score: 0.16                                                                                         |    |  | Count | P_Value | Benjamini |
| <input type="checkbox"/> | GOTERM_MF_FAT         | <a href="#">phosphoprotein phosphatase activity</a>                                                            | RT |  | 18    | 4.9E-1  | 1.0E0     |
| <input type="checkbox"/> | INTERPRO              | <a href="#">Serine/threonine-specific protein phosphatase and bis(5-nucleosyl)-tetraphosphatase</a>            | RT |  | 10    | 5.5E-1  | 1.0E0     |
| <input type="checkbox"/> | SMART                 | <a href="#">PP2Ac</a>                                                                                          | RT |  | 10    | 5.7E-1  | 1.0E0     |
| <input type="checkbox"/> | INTERPRO              | <a href="#">Metallophosphoesterase</a>                                                                         | RT |  | 13    | 6.3E-1  | 1.0E0     |
| <input type="checkbox"/> | GOTERM_MF_FAT         | <a href="#">phosphatase activity</a>                                                                           | RT |  | 25    | 7.6E-1  | 1.0E0     |
| <input type="checkbox"/> | GOTERM_MF_FAT         | <a href="#">iron ion binding</a>                                                                               | RT |  | 17    | 8.4E-1  | 1.0E0     |
| <input type="checkbox"/> | SP_PIR_KEYWORDS       | <a href="#">iron</a>                                                                                           | RT |  | 11    | 8.6E-1  | 9.9E-1    |
| <input type="checkbox"/> | PIR_SUPERFAMILY       | PIRSF000908:serine/threonine-protein phosphatase, conventional type                                            | RT |  | 4     | 9.5E-1  | 1.0E0     |
|                          | Annotation Cluster 44 | Enrichment Score: 0.16                                                                                         |    |  | Count | P_Value | Benjamini |
| <input type="checkbox"/> | GOTERM_CC_FAT         | <a href="#">proteasome complex</a>                                                                             | RT |  | 14    | 2.9E-1  | 1.0E0     |
| <input type="checkbox"/> | GOTERM_CC_FAT         | <a href="#">cytosol</a>                                                                                        | RT |  | 18    | 3.6E-1  | 1.0E0     |
| <input type="checkbox"/> | SP_PIR_KEYWORDS       | <a href="#">proteasome</a>                                                                                     | RT |  | 13    | 5.7E-1  | 1.0E0     |
| <input type="checkbox"/> | KEGG_PATHWAY          | <a href="#">Proteasome</a>                                                                                     | RT |  | 17    | 6.6E-1  | 9.9E-1    |
| <input type="checkbox"/> | GOTERM_CC_FAT         | <a href="#">proteasome core complex</a>                                                                        | RT |  | 8     | 7.1E-1  | 1.0E0     |
| <input type="checkbox"/> | INTERPRO              | <a href="#">Proteasome, beta-type subunit, conserved site</a>                                                  | RT |  | 3     | 8.0E-1  | 1.0E0     |
| <input type="checkbox"/> | INTERPRO              | <a href="#">Proteasome, subunit alpha/beta</a>                                                                 | RT |  | 8     | 8.1E-1  | 1.0E0     |
| <input type="checkbox"/> | GOTERM_MF_FAT         | <a href="#">threonine-type endopeptidase activity</a>                                                          | RT |  | 8     | 8.2E-1  | 1.0E0     |

| <input type="checkbox"/> |                 |                                                                     |    |  | Count | P_Value | Benjamini |
|--------------------------|-----------------|---------------------------------------------------------------------|----|--|-------|---------|-----------|
| <input type="checkbox"/> | GOTERM_MF_FAT   | <a href="#">threonine-type peptidase activity</a>                   | RT |  | 8     | 8.2E-1  | 1.0E0     |
| <input type="checkbox"/> | INTERPRO        | <a href="#">Proteasome, alpha and beta subunits</a>                 | RT |  | 7     | 8.8E-1  | 1.0E0     |
| <input type="checkbox"/> | INTERPRO        | <a href="#">Proteasome, alpha-subunit, conserved site</a>           | RT |  | 4     | 8.9E-1  | 1.0E0     |
| <input type="checkbox"/> | SP_PIR_KEYWORDS | <a href="#">threonine protease</a>                                  | RT |  | 3     | 9.6E-1  | 1.0E0     |
| <input type="checkbox"/> | PIR_SUPERFAMILY | PIRSF001212: multicatalytic endopeptidase complex chain C9          | RT |  | 3     | 9.6E-1  | 1.0E0     |
| Annotation Cluster 45    |                 | Enrichment Score: 0.16                                              |    |  | Count | P_Value | Benjamini |
| <input type="checkbox"/> | GOTERM_BP_FAT   | <a href="#">proteolysis</a>                                         | RT |  | 55    | 2.9E-1  | 1.0E0     |
| <input type="checkbox"/> | GOTERM_MF_FAT   | <a href="#">peptidase activity, acting on L-amino acid peptides</a> | RT |  | 41    | 5.4E-1  | 1.0E0     |
| <input type="checkbox"/> | GOTERM_MF_FAT   | <a href="#">peptidase activity</a>                                  | RT |  | 47    | 5.8E-1  | 1.0E0     |
| <input type="checkbox"/> | GOTERM_MF_FAT   | <a href="#">endopeptidase activity</a>                              | RT |  | 27    | 6.7E-1  | 1.0E0     |
| <input type="checkbox"/> | GOTERM_MF_FAT   | <a href="#">cysteine-type endopeptidase activity</a>                | RT |  | 14    | 7.4E-1  | 1.0E0     |
| <input type="checkbox"/> | GOTERM_MF_FAT   | <a href="#">cysteine-type peptidase activity</a>                    | RT |  | 17    | 7.8E-1  | 1.0E0     |
| <input type="checkbox"/> | INTERPRO        | <a href="#">Peptidase C1A, papain</a>                               | RT |  | 15    | 8.1E-1  | 1.0E0     |
| <input type="checkbox"/> | INTERPRO        | <a href="#">Peptidase C1A, papain C-terminal</a>                    | RT |  | 15    | 8.1E-1  | 1.0E0     |
| <input type="checkbox"/> | SP_PIR_KEYWORDS | <a href="#">thiol protease</a>                                      | RT |  | 6     | 8.2E-1  | 9.9E-1    |
| <input type="checkbox"/> | SMART           | <a href="#">Pept_C1</a>                                             | RT |  | 15    | 8.2E-1  | 1.0E0     |
| <input type="checkbox"/> | SP_PIR_KEYWORDS | <a href="#">Protease</a>                                            | RT |  | 19    | 9.0E-1  | 1.0E0     |
| <input type="checkbox"/> | INTERPRO        | <a href="#">Peptidase, cysteine peptidase active site</a>           | RT |  | 15    | 9.3E-1  | 1.0E0     |
| Annotation Cluster 46    |                 | Enrichment Score: 0.16                                              |    |  | Count | P_Value | Benjamini |
| <input type="checkbox"/> | INTERPRO        | <a href="#">EF-Hand type</a>                                        | RT |  | 12    | 5.0E-1  | 1.0E0     |
| <input type="checkbox"/> | INTERPRO        | <a href="#">EF-HAND_2</a>                                           | RT |  | 11    | 5.8E-1  | 1.0E0     |
| <input type="checkbox"/> | SP_PIR_KEYWORDS | <a href="#">calcium</a>                                             | RT |  | 10    | 5.8E-1  | 1.0E0     |
| <input type="checkbox"/> | INTERPRO        | <a href="#">EF-HAND_1</a>                                           | RT |  | 12    | 7.0E-1  | 1.0E0     |
| <input type="checkbox"/> | INTERPRO        | <a href="#">Calcium-binding EF-hand</a>                             | RT |  | 6     | 8.8E-1  | 1.0E0     |
| <input type="checkbox"/> | INTERPRO        | <a href="#">EF hand</a>                                             | RT |  | 6     | 8.8E-1  | 1.0E0     |
| <input type="checkbox"/> | SMART           | <a href="#">EFh</a>                                                 | RT |  | 6     | 8.8E-1  | 1.0E0     |
| Annotation Cluster 47    |                 | Enrichment Score: 0.15                                              |    |  | Count | P_Value | Benjamini |
| <input type="checkbox"/> | GOTERM_BP_FAT   | <a href="#">hexose catabolic process</a>                            | RT |  | 9     | 6.3E-1  | 1.0E0     |
| <input type="checkbox"/> | GOTERM_BP_FAT   | <a href="#">alcohol catabolic process</a>                           | RT |  | 9     | 6.3E-1  | 1.0E0     |
| <input type="checkbox"/> | GOTERM_BP_FAT   | <a href="#">glucose catabolic process</a>                           | RT |  | 9     | 6.3E-1  | 1.0E0     |
| <input type="checkbox"/> | GOTERM_BP_FAT   | <a href="#">monosaccharide catabolic process</a>                    | RT |  | 9     | 6.3E-1  | 1.0E0     |
| <input type="checkbox"/> | GOTERM_BP_FAT   | <a href="#">cellular carbohydrate catabolic process</a>             | RT |  | 9     | 6.3E-1  | 1.0E0     |
| <input type="checkbox"/> | GOTERM_BP_FAT   | <a href="#">carbohydrate catabolic process</a>                      | RT |  | 9     | 6.3E-1  | 1.0E0     |
| <input type="checkbox"/> | KEGG_PATHWAY    | <a href="#">Glycolysis / Gluconeogenesis</a>                        | RT |  | 5     | 6.9E-1  | 9.7E-1    |
| <input type="checkbox"/> | GOTERM_BP_FAT   | <a href="#">generation of precursor metabolites and energy</a>      | RT |  | 15    | 7.4E-1  | 1.0E0     |
| <input type="checkbox"/> | GOTERM_BP_FAT   | <a href="#">monosaccharide metabolic process</a>                    | RT |  | 13    | 7.8E-1  | 1.0E0     |
| <input type="checkbox"/> | GOTERM_BP_FAT   | <a href="#">hexose metabolic process</a>                            | RT |  | 11    | 8.3E-1  | 1.0E0     |
| <input type="checkbox"/> | GOTERM_BP_FAT   | <a href="#">glucose metabolic process</a>                           | RT |  | 11    | 8.3E-1  | 1.0E0     |
| <input type="checkbox"/> | GOTERM_BP_FAT   | <a href="#">glycolysis</a>                                          | RT |  | 6     | 8.7E-1  | 1.0E0     |
| Annotation Cluster 48    |                 | Enrichment Score: 0.14                                              |    |  | Count | P_Value | Benjamini |
| <input type="checkbox"/> | INTERPRO        | <a href="#">Prefoldin alpha-like</a>                                | RT |  | 3     | 6.2E-1  | 1.0E0     |
| <input type="checkbox"/> | GOTERM_CC_FAT   | <a href="#">prefoldin complex</a>                                   | RT |  | 4     | 7.2E-1  | 1.0E0     |
| <input type="checkbox"/> | GOTERM_CC_FAT   | <a href="#">cytosolic part</a>                                      | RT |  | 5     | 8.2E-1  | 1.0E0     |
| Annotation Cluster 49    |                 | Enrichment Score: 0.14                                              |    |  | Count | P_Value | Benjamini |
| <input type="checkbox"/> | GOTERM_MF_FAT   | <a href="#">dipeptidase activity</a>                                | RT |  | 3     | 6.3E-1  | 1.0E0     |
| <input type="checkbox"/> | SP_PIR_KEYWORDS | <a href="#">dipeptidase</a>                                         | RT |  | 3     | 6.4E-1  | 1.0E0     |
| <input type="checkbox"/> | GOTERM_MF_FAT   | <a href="#">exopeptidase activity</a>                               | RT |  | 7     | 7.2E-1  | 1.0E0     |
| <input type="checkbox"/> | GOTERM_MF_FAT   | <a href="#">metallopeptidase activity</a>                           | RT |  | 8     | 7.4E-1  | 1.0E0     |
| <input type="checkbox"/> | GOTERM_MF_FAT   | <a href="#">metalloexopeptidase activity</a>                        | RT |  | 4     | 8.9E-1  | 1.0E0     |
| Annotation Cluster 50    |                 | Enrichment Score: 0.14                                              |    |  | Count | P_Value | Benjamini |
| <input type="checkbox"/> | GOTERM_BP_FAT   | <a href="#">cellular amino acid derivative biosynthetic process</a> | RT |  | 3     | 6.2E-1  | 1.0E0     |
| <input type="checkbox"/> | KEGG_PATHWAY    | <a href="#">Glutathione metabolism</a>                              | RT |  | 4     | 6.7E-1  | 9.8E-1    |
| <input type="checkbox"/> | GOTERM_BP_FAT   | <a href="#">cellular amino acid derivative metabolic process</a>    | RT |  | 3     | 9.0E-1  | 1.0E0     |
| Annotation Cluster 51    |                 | Enrichment Score: 0.14                                              |    |  | Count | P_Value | Benjamini |
| <input type="checkbox"/> | GOTERM_BP_FAT   | <a href="#">organophosphate metabolic process</a>                   | RT |  | 9     | 5.1E-1  | 1.0E0     |
| <input type="checkbox"/> | GOTERM_BP_FAT   | <a href="#">phospholipid metabolic process</a>                      | RT |  | 8     | 6.1E-1  | 1.0E0     |
| <input type="checkbox"/> | GOTERM_MF_FAT   | <a href="#">inositol or phosphatidylinositol kinase activity</a>    | RT |  | 4     | 6.6E-1  | 1.0E0     |

| <input type="checkbox"/> | Annotation            | Term                                                                 | RT | Bar | Count | P_Value | Benjamini |
|--------------------------|-----------------------|----------------------------------------------------------------------|----|-----|-------|---------|-----------|
| <input type="checkbox"/> | GOTERM_BP_FAT         | <a href="#">glycerolipid metabolic process</a>                       | RT |     | 4     | 8.8E-1  | 1.0E0     |
| <input type="checkbox"/> | GOTERM_BP_FAT         | <a href="#">phosphoinositide metabolic process</a>                   | RT |     | 4     | 8.8E-1  | 1.0E0     |
| <input type="checkbox"/> | GOTERM_BP_FAT         | <a href="#">glycerophospholipid metabolic process</a>                | RT |     | 4     | 8.8E-1  | 1.0E0     |
|                          | Annotation Cluster 52 | Enrichment Score: 0.13                                               |    |     | Count | P_Value | Benjamini |
| <input type="checkbox"/> | INTERPRO              | <a href="#">Cyclin-related</a>                                       | RT |     | 5     | 5.1E-1  | 1.0E0     |
| <input type="checkbox"/> | INTERPRO              | <a href="#">Cyclin</a>                                               | RT |     | 3     | 9.0E-1  | 1.0E0     |
| <input type="checkbox"/> | SMART                 | <a href="#">CYCLIN</a>                                               | RT |     | 3     | 9.0E-1  | 1.0E0     |
|                          | Annotation Cluster 53 | Enrichment Score: 0.12                                               |    |     | Count | P_Value | Benjamini |
| <input type="checkbox"/> | INTERPRO              | <a href="#">Kelch-type beta propeller</a>                            | RT |     | 5     | 6.7E-1  | 1.0E0     |
| <input type="checkbox"/> | INTERPRO              | <a href="#">Kelch repeat type 1</a>                                  | RT |     | 4     | 7.9E-1  | 1.0E0     |
| <input type="checkbox"/> | SMART                 | <a href="#">Kelch</a>                                                | RT |     | 4     | 8.0E-1  | 1.0E0     |
|                          | Annotation Cluster 54 | Enrichment Score: 0.12                                               |    |     | Count | P_Value | Benjamini |
| <input type="checkbox"/> | GOTERM_CC_FAT         | <a href="#">flagellum</a>                                            | RT |     | 3     | 7.4E-1  | 1.0E0     |
| <input type="checkbox"/> | GOTERM_CC_FAT         | <a href="#">cell projection</a>                                      | RT |     | 3     | 7.4E-1  | 1.0E0     |
| <input type="checkbox"/> | SP_PIR_KEYWORDS       | <a href="#">flagellum</a>                                            | RT |     | 3     | 8.1E-1  | 1.0E0     |
|                          | Annotation Cluster 55 | Enrichment Score: 0.11                                               |    |     | Count | P_Value | Benjamini |
| <input type="checkbox"/> | INTERPRO              | <a href="#">Molecular chaperone, heat shock protein, Hsp40, DnaJ</a> | RT |     | 5     | 6.7E-1  | 1.0E0     |
| <input type="checkbox"/> | INTERPRO              | <a href="#">Heat shock protein DnaJ, N-terminal</a>                  | RT |     | 5     | 8.0E-1  | 1.0E0     |
| <input type="checkbox"/> | GOTERM_MF_FAT         | <a href="#">heat shock protein binding</a>                           | RT |     | 5     | 8.0E-1  | 1.0E0     |
| <input type="checkbox"/> | SMART                 | <a href="#">DnaJ</a>                                                 | RT |     | 5     | 8.1E-1  | 1.0E0     |
|                          | Annotation Cluster 56 | Enrichment Score: 0.11                                               |    |     | Count | P_Value | Benjamini |
| <input type="checkbox"/> | GOTERM_MF_FAT         | <a href="#">ATP-dependent helicase activity</a>                      | RT |     | 23    | 6.0E-1  | 1.0E0     |
| <input type="checkbox"/> | GOTERM_MF_FAT         | <a href="#">purine NTP-dependent helicase activity</a>               | RT |     | 23    | 6.0E-1  | 1.0E0     |
| <input type="checkbox"/> | INTERPRO              | <a href="#">DNA/RNA helicase, DEAD/DEAH box type, N-terminal</a>     | RT |     | 18    | 6.4E-1  | 1.0E0     |
| <input type="checkbox"/> | GOTERM_MF_FAT         | <a href="#">ATPase activity</a>                                      | RT |     | 54    | 7.1E-1  | 1.0E0     |
| <input type="checkbox"/> | INTERPRO              | <a href="#">RNA helicase, DEAD-box type, Q motif</a>                 | RT |     | 10    | 7.5E-1  | 1.0E0     |
| <input type="checkbox"/> | INTERPRO              | <a href="#">DEAD-like helicase, N-terminal</a>                       | RT |     | 24    | 7.8E-1  | 1.0E0     |
| <input type="checkbox"/> | SMART                 | <a href="#">DEXDc</a>                                                | RT |     | 24    | 8.0E-1  | 1.0E0     |
| <input type="checkbox"/> | GOTERM_MF_FAT         | <a href="#">ATPase activity, coupled</a>                             | RT |     | 39    | 8.1E-1  | 1.0E0     |
| <input type="checkbox"/> | INTERPRO              | <a href="#">Helicase, superfamily 1 and 2, ATP-binding</a>           | RT |     | 23    | 8.6E-1  | 1.0E0     |
| <input type="checkbox"/> | SP_PIR_KEYWORDS       | <a href="#">helicase</a>                                             | RT |     | 24    | 8.6E-1  | 9.9E-1    |
| <input type="checkbox"/> | INTERPRO              | <a href="#">DNA/RNA helicase, C-terminal</a>                         | RT |     | 23    | 9.0E-1  | 1.0E0     |
| <input type="checkbox"/> | SMART                 | <a href="#">HELICc</a>                                               | RT |     | 23    | 9.1E-1  | 1.0E0     |
| <input type="checkbox"/> | GOTERM_MF_FAT         | <a href="#">helicase activity</a>                                    | RT |     | 28    | 9.3E-1  | 1.0E0     |
|                          | Annotation Cluster 57 | Enrichment Score: 0.11                                               |    |     | Count | P_Value | Benjamini |
| <input type="checkbox"/> | GOTERM_BP_FAT         | <a href="#">ribonucleoside metabolic process</a>                     | RT |     | 5     | 6.7E-1  | 1.0E0     |
| <input type="checkbox"/> | GOTERM_BP_FAT         | <a href="#">purine ribonucleoside metabolic process</a>              | RT |     | 3     | 8.0E-1  | 1.0E0     |
| <input type="checkbox"/> | GOTERM_BP_FAT         | <a href="#">purine nucleoside metabolic process</a>                  | RT |     | 3     | 8.0E-1  | 1.0E0     |
| <input type="checkbox"/> | GOTERM_BP_FAT         | <a href="#">nucleoside metabolic process</a>                         | RT |     | 7     | 8.7E-1  | 1.0E0     |
|                          | Annotation Cluster 58 | Enrichment Score: 0.11                                               |    |     | Count | P_Value | Benjamini |
| <input type="checkbox"/> | INTERPRO              | <a href="#">EGF-like, type 3</a>                                     | RT |     | 18    | 7.8E-1  | 1.0E0     |
| <input type="checkbox"/> | SP_PIR_KEYWORDS       | <a href="#">egf-like domain</a>                                      | RT |     | 10    | 7.8E-1  | 9.9E-1    |
| <input type="checkbox"/> | INTERPRO              | <a href="#">EGF, extracellular</a>                                   | RT |     | 13    | 7.9E-1  | 1.0E0     |
|                          | Annotation Cluster 59 | Enrichment Score: 0.1                                                |    |     | Count | P_Value | Benjamini |
| <input type="checkbox"/> | SP_PIR_KEYWORDS       | <a href="#">membrane</a>                                             | RT |     | 16    | 7.2E-1  | 9.9E-1    |
| <input type="checkbox"/> | GOTERM_CC_FAT         | <a href="#">integral to membrane</a>                                 | RT |     | 34    | 7.9E-1  | 1.0E0     |
| <input type="checkbox"/> | GOTERM_CC_FAT         | <a href="#">intrinsic to membrane</a>                                | RT |     | 34    | 7.9E-1  | 1.0E0     |
| <input type="checkbox"/> | INTERPRO              | <a href="#">Amino acid transporter, transmembrane</a>                | RT |     | 6     | 8.0E-1  | 1.0E0     |
| <input type="checkbox"/> | SP_PIR_KEYWORDS       | <a href="#">transmembrane</a>                                        | RT |     | 16    | 8.9E-1  | 1.0E0     |
|                          | Annotation Cluster 60 | Enrichment Score: 0.1                                                |    |     | Count | P_Value | Benjamini |
| <input type="checkbox"/> | INTERPRO              | <a href="#">Protein phosphatase 2C</a>                               | RT |     | 4     | 7.9E-1  | 1.0E0     |
| <input type="checkbox"/> | INTERPRO              | <a href="#">Protein phosphatase 2C, N-terminal</a>                   | RT |     | 4     | 7.9E-1  | 1.0E0     |
| <input type="checkbox"/> | INTERPRO              | <a href="#">Protein phosphatase 2C-related</a>                       | RT |     | 4     | 7.9E-1  | 1.0E0     |
| <input type="checkbox"/> | SMART                 | <a href="#">PP2Cc</a>                                                | RT |     | 4     | 8.0E-1  | 1.0E0     |
| <input type="checkbox"/> | SMART                 | <a href="#">PP2C_SIG</a>                                             | RT |     | 4     | 8.0E-1  | 1.0E0     |
|                          | Annotation Cluster 61 | Enrichment Score: 0.09                                               |    |     | Count | P_Value | Benjamini |
| <input type="checkbox"/> | INTERPRO              | <a href="#">Peptidyl-prolyl cis-trans isomerase, FKBP-type</a>       | RT |     | 4     | 7.9E-1  | 1.0E0     |
| <input type="checkbox"/> | GOTERM_MF_FAT         | <a href="#">cis-trans isomerase activity</a>                         | RT |     | 5     | 8.0E-1  | 1.0E0     |

| <input type="checkbox"/> | GOTERM_MF_FAT         | <a href="#">peptidyl-prolyl cis-trans isomerase activity</a>                  | RT |  |  |  |  | 5     | 8.0E-1  | 1.0E0     |
|--------------------------|-----------------------|-------------------------------------------------------------------------------|----|--|--|--|--|-------|---------|-----------|
| <input type="checkbox"/> | SP_PIR_KEYWORDS       | <a href="#">Rotamase</a>                                                      | RT |  |  |  |  | 5     | 8.1E-1  | 9.9E-1    |
|                          | Annotation Cluster 62 | Enrichment Score: 0.08                                                        |    |  |  |  |  | Count | P_Value | Benjamini |
| <input type="checkbox"/> | INTERPRO              | <a href="#">Dynein heavy chain, N-terminal region 2</a>                       | RT |  |  |  |  | 7     | 7.1E-1  | 1.0E0     |
| <input type="checkbox"/> | GOTERM_CC_FAT         | <a href="#">microtubule associated complex</a>                                | RT |  |  |  |  | 8     | 8.0E-1  | 1.0E0     |
| <input type="checkbox"/> | GOTERM_CC_FAT         | <a href="#">dynein complex</a>                                                | RT |  |  |  |  | 6     | 8.7E-1  | 1.0E0     |
| <input type="checkbox"/> | INTERPRO              | <a href="#">Dynein heavy chain</a>                                            | RT |  |  |  |  | 6     | 9.3E-1  | 1.0E0     |
|                          | Annotation Cluster 63 | Enrichment Score: 0.08                                                        |    |  |  |  |  | Count | P_Value | Benjamini |
| <input type="checkbox"/> | SP_PIR_KEYWORDS       | <a href="#">ligase</a>                                                        | RT |  |  |  |  | 32    | 7.2E-1  | 9.9E-1    |
| <input type="checkbox"/> | GOTERM_MF_FAT         | <a href="#">aminoacyl-tRNA ligase activity</a>                                | RT |  |  |  |  | 14    | 7.4E-1  | 1.0E0     |
| <input type="checkbox"/> | GOTERM_MF_FAT         | <a href="#">ligase activity, forming carbon-oxygen bonds</a>                  | RT |  |  |  |  | 14    | 7.4E-1  | 1.0E0     |
| <input type="checkbox"/> | GOTERM_MF_FAT         | <a href="#">ligase activity, forming aminoacyl-tRNA and related compounds</a> | RT |  |  |  |  | 14    | 7.4E-1  | 1.0E0     |
| <input type="checkbox"/> | INTERPRO              | <a href="#">Rossmann-like alpha/beta/alpha sandwich fold</a>                  | RT |  |  |  |  | 11    | 7.7E-1  | 1.0E0     |
| <input type="checkbox"/> | GOTERM_BP_FAT         | <a href="#">tRNA aminoacylation</a>                                           | RT |  |  |  |  | 13    | 7.8E-1  | 1.0E0     |
| <input type="checkbox"/> | GOTERM_BP_FAT         | <a href="#">amino acid activation</a>                                         | RT |  |  |  |  | 13    | 7.8E-1  | 1.0E0     |
| <input type="checkbox"/> | SP_PIR_KEYWORDS       | <a href="#">Aminoacyl-tRNA synthetase</a>                                     | RT |  |  |  |  | 13    | 8.2E-1  | 9.9E-1    |
| <input type="checkbox"/> | GOTERM_BP_FAT         | <a href="#">tRNA aminoacylation for protein translation</a>                   | RT |  |  |  |  | 12    | 8.4E-1  | 1.0E0     |
| <input type="checkbox"/> | INTERPRO              | <a href="#">Aminoacyl-tRNA synthetase, class I, conserved site</a>            | RT |  |  |  |  | 5     | 8.8E-1  | 1.0E0     |
| <input type="checkbox"/> | GOTERM_BP_FAT         | <a href="#">tRNA metabolic process</a>                                        | RT |  |  |  |  | 21    | 8.8E-1  | 1.0E0     |
| <input type="checkbox"/> | KEGG_PATHWAY          | <a href="#">Aminoacyl-tRNA biosynthesis</a>                                   | RT |  |  |  |  | 11    | 9.1E-1  | 9.9E-1    |
| <input type="checkbox"/> | GOTERM_BP_FAT         | <a href="#">ncRNA metabolic process</a>                                       | RT |  |  |  |  | 27    | 9.1E-1  | 1.0E0     |
| <input type="checkbox"/> | SP_PIR_KEYWORDS       | <a href="#">protein biosynthesis</a>                                          | RT |  |  |  |  | 5     | 9.4E-1  | 1.0E0     |
| <input type="checkbox"/> | INTERPRO              | <a href="#">Aminoacyl-tRNA synthetase, class II, conserved region</a>         | RT |  |  |  |  | 4     | 9.7E-1  | 1.0E0     |
|                          | Annotation Cluster 64 | Enrichment Score: 0.07                                                        |    |  |  |  |  | Count | P_Value | Benjamini |
| <input type="checkbox"/> | INTERPRO              | <a href="#">Ubiquitin supergroup</a>                                          | RT |  |  |  |  | 7     | 8.1E-1  | 1.0E0     |
| <input type="checkbox"/> | INTERPRO              | <a href="#">Ubiquitin</a>                                                     | RT |  |  |  |  | 4     | 8.9E-1  | 1.0E0     |
| <input type="checkbox"/> | SMART                 | <a href="#">UBQ</a>                                                           | RT |  |  |  |  | 4     | 8.9E-1  | 1.0E0     |
|                          | Annotation Cluster 65 | Enrichment Score: 0.05                                                        |    |  |  |  |  | Count | P_Value | Benjamini |
| <input type="checkbox"/> | GOTERM_MF_FAT         | <a href="#">antiporter activity</a>                                           | RT |  |  |  |  | 4     | 8.0E-1  | 1.0E0     |
| <input type="checkbox"/> | GOTERM_BP_FAT         | <a href="#">multidrug transport</a>                                           | RT |  |  |  |  | 3     | 9.0E-1  | 1.0E0     |
| <input type="checkbox"/> | GOTERM_BP_FAT         | <a href="#">drug transport</a>                                                | RT |  |  |  |  | 3     | 9.0E-1  | 1.0E0     |
| <input type="checkbox"/> | GOTERM_BP_FAT         | <a href="#">response to drug</a>                                              | RT |  |  |  |  | 3     | 9.0E-1  | 1.0E0     |
| <input type="checkbox"/> | INTERPRO              | <a href="#">Multi antimicrobial extrusion protein MatE</a>                    | RT |  |  |  |  | 3     | 9.0E-1  | 1.0E0     |
| <input type="checkbox"/> | GOTERM_MF_FAT         | <a href="#">drug transporter activity</a>                                     | RT |  |  |  |  | 3     | 9.0E-1  | 1.0E0     |
|                          | Annotation Cluster 66 | Enrichment Score: 0.05                                                        |    |  |  |  |  | Count | P_Value | Benjamini |
| <input type="checkbox"/> | INTERPRO              | <a href="#">Like-Sm ribonucleoprotein, core</a>                               | RT |  |  |  |  | 6     | 8.8E-1  | 1.0E0     |
| <input type="checkbox"/> | INTERPRO              | <a href="#">Like-Sm ribonucleoprotein, eukaryotic and archaea-type, core</a>  | RT |  |  |  |  | 4     | 8.9E-1  | 1.0E0     |
| <input type="checkbox"/> | SMART                 | <a href="#">Sm</a>                                                            | RT |  |  |  |  | 4     | 8.9E-1  | 1.0E0     |
| <input type="checkbox"/> | SP_PIR_KEYWORDS       | <a href="#">viral nucleoprotein</a>                                           | RT |  |  |  |  | 8     | 8.9E-1  | 1.0E0     |
|                          | Annotation Cluster 67 | Enrichment Score: 0.05                                                        |    |  |  |  |  | Count | P_Value | Benjamini |
| <input type="checkbox"/> | GOTERM_BP_FAT         | <a href="#">tRNA modification</a>                                             | RT |  |  |  |  | 3     | 8.0E-1  | 1.0E0     |
| <input type="checkbox"/> | GOTERM_BP_FAT         | <a href="#">RNA modification</a>                                              | RT |  |  |  |  | 8     | 9.2E-1  | 1.0E0     |
| <input type="checkbox"/> | GOTERM_BP_FAT         | <a href="#">tRNA processing</a>                                               | RT |  |  |  |  | 8     | 9.5E-1  | 1.0E0     |
|                          | Annotation Cluster 68 | Enrichment Score: 0.05                                                        |    |  |  |  |  | Count | P_Value | Benjamini |
| <input type="checkbox"/> | GOTERM_BP_FAT         | <a href="#">cellular carbohydrate biosynthetic process</a>                    | RT |  |  |  |  | 4     | 8.8E-1  | 1.0E0     |
| <input type="checkbox"/> | GOTERM_BP_FAT         | <a href="#">carbohydrate biosynthetic process</a>                             | RT |  |  |  |  | 4     | 8.8E-1  | 1.0E0     |
| <input type="checkbox"/> | GOTERM_BP_FAT         | <a href="#">alcohol biosynthetic process</a>                                  | RT |  |  |  |  | 3     | 9.0E-1  | 1.0E0     |
|                          | Annotation Cluster 69 | Enrichment Score: 0.05                                                        |    |  |  |  |  | Count | P_Value | Benjamini |
| <input type="checkbox"/> | GOTERM_BP_FAT         | <a href="#">ribonucleoprotein complex biogenesis</a>                          | RT |  |  |  |  | 11    | 8.3E-1  | 1.0E0     |
| <input type="checkbox"/> | GOTERM_BP_FAT         | <a href="#">ribosome biogenesis</a>                                           | RT |  |  |  |  | 11    | 8.3E-1  | 1.0E0     |
| <input type="checkbox"/> | GOTERM_BP_FAT         | <a href="#">rRNA processing</a>                                               | RT |  |  |  |  | 6     | 9.6E-1  | 1.0E0     |
| <input type="checkbox"/> | GOTERM_BP_FAT         | <a href="#">rRNA metabolic process</a>                                        | RT |  |  |  |  | 6     | 9.6E-1  | 1.0E0     |
|                          | Annotation Cluster 70 | Enrichment Score: 0.05                                                        |    |  |  |  |  | Count | P_Value | Benjamini |
| <input type="checkbox"/> | INTERPRO              | <a href="#">AMP-dependent synthetase and ligase</a>                           | RT |  |  |  |  | 4     | 8.9E-1  | 1.0E0     |
| <input type="checkbox"/> | GOTERM_MF_FAT         | <a href="#">fatty-acid ligase activity</a>                                    | RT |  |  |  |  | 3     | 9.0E-1  | 1.0E0     |
| <input type="checkbox"/> | GOTERM_MF_FAT         | <a href="#">long-chain-fatty-acid-CoA ligase activity</a>                     | RT |  |  |  |  | 3     | 9.0E-1  | 1.0E0     |
| <input type="checkbox"/> | GOTERM_MF_FAT         | <a href="#">ligase activity, forming carbon-sulfur bonds</a>                  | RT |  |  |  |  | 3     | 9.0E-1  | 1.0E0     |
|                          | Annotation Cluster 71 | Enrichment Score: 0.05                                                        |    |  |  |  |  | Count | P_Value | Benjamini |

| <input type="checkbox"/> | Term            | Enrichment Score                                                     | Count | P-Value | Benjamini |
|--------------------------|-----------------|----------------------------------------------------------------------|-------|---------|-----------|
| <input type="checkbox"/> | GOTERM_BP_FAT   | <a href="#">mismatch repair</a>                                      | 3     | 9.0E-1  | 1.0E0     |
| <input type="checkbox"/> | GOTERM_MF_FAT   | <a href="#">double-stranded DNA binding</a>                          | 3     | 9.0E-1  | 1.0E0     |
| <input type="checkbox"/> | GOTERM_MF_FAT   | <a href="#">mismatched DNA binding</a>                               | 3     | 9.0E-1  | 1.0E0     |
| <input type="checkbox"/> | GOTERM_MF_FAT   | <a href="#">structure-specific DNA binding</a>                       | 3     | 9.0E-1  | 1.0E0     |
| Annotation Cluster 72    |                 | Enrichment Score: 0.04                                               |       |         |           |
| <input type="checkbox"/> | GOTERM_BP_FAT   | <a href="#">cell cycle</a>                                           | 5     | 7.9E-1  | 1.0E0     |
| <input type="checkbox"/> | GOTERM_BP_FAT   | <a href="#">cell cycle phase</a>                                     | 3     | 9.5E-1  | 1.0E0     |
| <input type="checkbox"/> | GOTERM_BP_FAT   | <a href="#">cell cycle process</a>                                   | 3     | 9.5E-1  | 1.0E0     |
| <input type="checkbox"/> | GOTERM_BP_FAT   | <a href="#">M phase</a>                                              | 3     | 9.5E-1  | 1.0E0     |
| Annotation Cluster 73    |                 | Enrichment Score: 0.04                                               |       |         |           |
| <input type="checkbox"/> | INTERPRO        | <a href="#">Tetratricopeptide TPR-1</a>                              | 11    | 8.3E-1  | 1.0E0     |
| <input type="checkbox"/> | INTERPRO        | <a href="#">Tetratricopeptide-like helical</a>                       | 16    | 9.0E-1  | 1.0E0     |
| <input type="checkbox"/> | INTERPRO        | <a href="#">Tetratricopeptide repeat</a>                             | 12    | 9.2E-1  | 1.0E0     |
| <input type="checkbox"/> | INTERPRO        | <a href="#">Tetratricopeptide region</a>                             | 12    | 9.2E-1  | 1.0E0     |
| <input type="checkbox"/> | SMART           | <a href="#">TPR</a>                                                  | 12    | 9.3E-1  | 1.0E0     |
| <input type="checkbox"/> | SP_PIR_KEYWORDS | <a href="#">tpr repeat</a>                                           | 4     | 9.7E-1  | 1.0E0     |
| Annotation Cluster 74    |                 | Enrichment Score: 0.04                                               |       |         |           |
| <input type="checkbox"/> | GOTERM_CC_FAT   | <a href="#">Golgi apparatus</a>                                      | 6     | 8.1E-1  | 1.0E0     |
| <input type="checkbox"/> | GOTERM_BP_FAT   | <a href="#">ER to Golgi vesicle-mediated transport</a>               | 3     | 9.5E-1  | 1.0E0     |
| <input type="checkbox"/> | GOTERM_BP_FAT   | <a href="#">Golgi vesicle transport</a>                              | 3     | 9.5E-1  | 1.0E0     |
| <input type="checkbox"/> | GOTERM_CC_FAT   | <a href="#">Golgi apparatus part</a>                                 | 3     | 9.8E-1  | 1.0E0     |
| Annotation Cluster 75    |                 | Enrichment Score: 0.04                                               |       |         |           |
| <input type="checkbox"/> | INTERPRO        | <a href="#">Myb_DNA-binding</a>                                      | 3     | 9.0E-1  | 1.0E0     |
| <input type="checkbox"/> | INTERPRO        | <a href="#">SANT_DNA-binding</a>                                     | 5     | 9.3E-1  | 1.0E0     |
| <input type="checkbox"/> | SMART           | <a href="#">SANT</a>                                                 | 5     | 9.4E-1  | 1.0E0     |
| Annotation Cluster 76    |                 | Enrichment Score: 0.03                                               |       |         |           |
| <input type="checkbox"/> | GOTERM_CC_FAT   | <a href="#">microtubule cytoskeleton</a>                             | 26    | 8.5E-1  | 1.0E0     |
| <input type="checkbox"/> | GOTERM_CC_FAT   | <a href="#">cytoskeletal part</a>                                    | 26    | 8.5E-1  | 1.0E0     |
| <input type="checkbox"/> | GOTERM_CC_FAT   | <a href="#">cytoskeleton</a>                                         | 27    | 8.5E-1  | 1.0E0     |
| <input type="checkbox"/> | GOTERM_CC_FAT   | <a href="#">microtubule</a>                                          | 16    | 8.8E-1  | 1.0E0     |
| <input type="checkbox"/> | INTERPRO        | <a href="#">Kinesin_motor region, conserved site</a>                 | 9     | 9.2E-1  | 1.0E0     |
| <input type="checkbox"/> | SP_PIR_KEYWORDS | <a href="#">motor protein</a>                                        | 12    | 9.4E-1  | 1.0E0     |
| <input type="checkbox"/> | GOTERM_MF_FAT   | <a href="#">motor activity</a>                                       | 21    | 9.5E-1  | 1.0E0     |
| <input type="checkbox"/> | GOTERM_MF_FAT   | <a href="#">microtubule motor activity</a>                           | 21    | 9.5E-1  | 1.0E0     |
| <input type="checkbox"/> | INTERPRO        | <a href="#">Kinesin_motor region</a>                                 | 13    | 9.7E-1  | 1.0E0     |
| <input type="checkbox"/> | SMART           | <a href="#">KISc</a>                                                 | 13    | 9.7E-1  | 1.0E0     |
| <input type="checkbox"/> | GOTERM_BP_FAT   | <a href="#">microtubule-based process</a>                            | 26    | 9.7E-1  | 1.0E0     |
| <input type="checkbox"/> | SP_PIR_KEYWORDS | <a href="#">microtubule</a>                                          | 15    | 9.7E-1  | 1.0E0     |
| <input type="checkbox"/> | GOTERM_BP_FAT   | <a href="#">microtubule-based movement</a>                           | 22    | 9.8E-1  | 1.0E0     |
| Annotation Cluster 77    |                 | Enrichment Score: 0.03                                               |       |         |           |
| <input type="checkbox"/> | GOTERM_BP_FAT   | <a href="#">one-carbon metabolic process</a>                         | 6     | 8.7E-1  | 1.0E0     |
| <input type="checkbox"/> | GOTERM_BP_FAT   | <a href="#">methylation</a>                                          | 5     | 9.3E-1  | 1.0E0     |
| <input type="checkbox"/> | SP_PIR_KEYWORDS | <a href="#">methyltransferase</a>                                    | 9     | 9.9E-1  | 1.0E0     |
| Annotation Cluster 78    |                 | Enrichment Score: 0.03                                               |       |         |           |
| <input type="checkbox"/> | INTERPRO        | <a href="#">RNA recognition motif_RNP-1</a>                          | 7     | 9.2E-1  | 1.0E0     |
| <input type="checkbox"/> | SMART           | <a href="#">RRM</a>                                                  | 7     | 9.3E-1  | 1.0E0     |
| <input type="checkbox"/> | INTERPRO        | <a href="#">Nucleotide-binding_alpha-beta plait</a>                  | 7     | 9.7E-1  | 1.0E0     |
| Annotation Cluster 79    |                 | Enrichment Score: 0.02                                               |       |         |           |
| <input type="checkbox"/> | GOTERM_BP_FAT   | <a href="#">ncRNA metabolic process</a>                              | 27    | 9.1E-1  | 1.0E0     |
| <input type="checkbox"/> | GOTERM_BP_FAT   | <a href="#">ncRNA processing</a>                                     | 14    | 9.5E-1  | 1.0E0     |
| <input type="checkbox"/> | GOTERM_BP_FAT   | <a href="#">tRNA processing</a>                                      | 8     | 9.5E-1  | 1.0E0     |
| <input type="checkbox"/> | GOTERM_BP_FAT   | <a href="#">RNA processing</a>                                       | 21    | 9.9E-1  | 1.0E0     |
| Annotation Cluster 80    |                 | Enrichment Score: 0.02                                               |       |         |           |
| <input type="checkbox"/> | GOTERM_CC_FAT   | <a href="#">chromosome</a>                                           | 13    | 8.9E-1  | 1.0E0     |
| <input type="checkbox"/> | GOTERM_CC_FAT   | <a href="#">chromosomal part</a>                                     | 8     | 9.1E-1  | 1.0E0     |
| <input type="checkbox"/> | GOTERM_CC_FAT   | <a href="#">protein-DNA complex</a>                                  | 6     | 9.2E-1  | 1.0E0     |
| <input type="checkbox"/> | INTERPRO        | <a href="#">Histone-fold</a>                                         | 7     | 9.2E-1  | 1.0E0     |
| <input type="checkbox"/> | GOTERM_CC_FAT   | <a href="#">nucleosome</a>                                           | 5     | 9.3E-1  | 1.0E0     |
| <input type="checkbox"/> | GOTERM_BP_FAT   | <a href="#">cellular macromolecular complex subunit organization</a> | 12    | 9.5E-1  | 1.0E0     |



|                          |                 |                                                                         |    |  |       |         |           |
|--------------------------|-----------------|-------------------------------------------------------------------------|----|--|-------|---------|-----------|
| <input type="checkbox"/> | GOTERM_BP_FAT   | <a href="#">macromolecular complex subunit organization</a>             | RT |  | 13    | 9.5E-1  | 1.0E0     |
| <input type="checkbox"/> | GOTERM_CC_FAT   | <a href="#">chromatin</a>                                               | RT |  | 5     | 9.6E-1  | 1.0E0     |
| <input type="checkbox"/> | GOTERM_BP_FAT   | <a href="#">nucleosome assembly</a>                                     | RT |  | 5     | 9.6E-1  | 1.0E0     |
| <input type="checkbox"/> | GOTERM_BP_FAT   | <a href="#">DNA packaging</a>                                           | RT |  | 5     | 9.6E-1  | 1.0E0     |
| <input type="checkbox"/> | GOTERM_BP_FAT   | <a href="#">nucleosome organization</a>                                 | RT |  | 5     | 9.6E-1  | 1.0E0     |
| <input type="checkbox"/> | GOTERM_BP_FAT   | <a href="#">chromatin assembly</a>                                      | RT |  | 5     | 9.6E-1  | 1.0E0     |
| <input type="checkbox"/> | GOTERM_BP_FAT   | <a href="#">protein-DNA complex assembly</a>                            | RT |  | 5     | 9.6E-1  | 1.0E0     |
| <input type="checkbox"/> | INTERPRO        | <a href="#">Histone core</a>                                            | RT |  | 5     | 9.6E-1  | 1.0E0     |
| <input type="checkbox"/> | GOTERM_BP_FAT   | <a href="#">macromolecular complex assembly</a>                         | RT |  | 12    | 9.7E-1  | 1.0E0     |
| <input type="checkbox"/> | GOTERM_BP_FAT   | <a href="#">cellular macromolecular complex assembly</a>                | RT |  | 11    | 9.7E-1  | 1.0E0     |
| <input type="checkbox"/> | SP_PIR_KEYWORDS | <a href="#">chromosomal protein</a>                                     | RT |  | 5     | 9.7E-1  | 1.0E0     |
| <input type="checkbox"/> | SP_PIR_KEYWORDS | <a href="#">nucleosome core</a>                                         | RT |  | 3     | 9.8E-1  | 1.0E0     |
| <input type="checkbox"/> | GOTERM_BP_FAT   | <a href="#">chromosome organization</a>                                 | RT |  | 8     | 9.8E-1  | 1.0E0     |
| <input type="checkbox"/> | GOTERM_BP_FAT   | <a href="#">chromatin organization</a>                                  | RT |  | 6     | 9.9E-1  | 1.0E0     |
| <input type="checkbox"/> | GOTERM_BP_FAT   | <a href="#">chromatin assembly or disassembly</a>                       | RT |  | 5     | 9.9E-1  | 1.0E0     |
| Annotation Cluster 81    |                 | Enrichment Score: 0.02                                                  |    |  | Count | P_Value | Benjamini |
| <input type="checkbox"/> | INTERPRO        | <a href="#">Zinc finger, C2H2-type</a>                                  | RT |  | 9     | 9.2E-1  | 1.0E0     |
| <input type="checkbox"/> | INTERPRO        | <a href="#">Zinc finger, C2H2-like</a>                                  | RT |  | 8     | 9.7E-1  | 1.0E0     |
| <input type="checkbox"/> | SMART           | <a href="#">ZnF_C2H2</a>                                                | RT |  | 8     | 9.7E-1  | 1.0E0     |
| Annotation Cluster 82    |                 | Enrichment Score: 0.02                                                  |    |  | Count | P_Value | Benjamini |
| <input type="checkbox"/> | GOTERM_BP_FAT   | <a href="#">RNA modification</a>                                        | RT |  | 8     | 9.2E-1  | 1.0E0     |
| <input type="checkbox"/> | GOTERM_MF_FAT   | <a href="#">intramolecular transferase activity</a>                     | RT |  | 5     | 9.6E-1  | 1.0E0     |
| <input type="checkbox"/> | GOTERM_BP_FAT   | <a href="#">pseudouridine synthesis</a>                                 | RT |  | 3     | 9.8E-1  | 1.0E0     |
| <input type="checkbox"/> | GOTERM_MF_FAT   | <a href="#">pseudouridine synthase activity</a>                         | RT |  | 3     | 9.8E-1  | 1.0E0     |
| Annotation Cluster 83    |                 | Enrichment Score: 0.02                                                  |    |  | Count | P_Value | Benjamini |
| <input type="checkbox"/> | GOTERM_MF_FAT   | <a href="#">electron carrier activity</a>                               | RT |  | 12    | 9.0E-1  | 1.0E0     |
| <input type="checkbox"/> | INTERPRO        | <a href="#">4Fe-4S ferredoxin, iron-sulphur binding domain</a>          | RT |  | 4     | 9.7E-1  | 1.0E0     |
| <input type="checkbox"/> | INTERPRO        | <a href="#">4Fe-4S ferredoxin, iron-sulphur binding, subgroup</a>       | RT |  | 4     | 9.7E-1  | 1.0E0     |
| <input type="checkbox"/> | INTERPRO        | <a href="#">4Fe-4S ferredoxin, iron-sulphur binding, conserved site</a> | RT |  | 3     | 9.8E-1  | 1.0E0     |
| <input type="checkbox"/> | GOTERM_MF_FAT   | <a href="#">metal cluster binding</a>                                   | RT |  | 8     | 9.9E-1  | 1.0E0     |
| <input type="checkbox"/> | GOTERM_MF_FAT   | <a href="#">iron-sulfur cluster binding</a>                             | RT |  | 8     | 9.9E-1  | 1.0E0     |
| Annotation Cluster 84    |                 | Enrichment Score: 0.01                                                  |    |  | Count | P_Value | Benjamini |
| <input type="checkbox"/> | GOTERM_BP_FAT   | <a href="#">protein complex assembly</a>                                | RT |  | 6     | 9.6E-1  | 1.0E0     |
| <input type="checkbox"/> | GOTERM_BP_FAT   | <a href="#">protein complex biogenesis</a>                              | RT |  | 6     | 9.6E-1  | 1.0E0     |
| <input type="checkbox"/> | GOTERM_BP_FAT   | <a href="#">cellular protein complex assembly</a>                       | RT |  | 5     | 9.6E-1  | 1.0E0     |
| <input type="checkbox"/> | INTERPRO        | <a href="#">Tubulin/FtsZ, 2-layer sandwich domain</a>                   | RT |  | 3     | 9.8E-1  | 1.0E0     |
| <input type="checkbox"/> | PIR_SUPERFAMILY | PIRSF002306:tubulin                                                     | RT |  | 3     | 9.8E-1  | 1.0E0     |
| <input type="checkbox"/> | GOTERM_BP_FAT   | <a href="#">protein polymerization</a>                                  | RT |  | 3     | 9.9E-1  | 1.0E0     |
| <input type="checkbox"/> | INTERPRO        | <a href="#">Tubulin, conserved site</a>                                 | RT |  | 3     | 9.9E-1  | 1.0E0     |
| <input type="checkbox"/> | INTERPRO        | <a href="#">Tubulin</a>                                                 | RT |  | 3     | 9.9E-1  | 1.0E0     |
| <input type="checkbox"/> | INTERPRO        | <a href="#">Tubulin/FtsZ, GTPase domain</a>                             | RT |  | 3     | 9.9E-1  | 1.0E0     |

186 terms were not clustered.

Please cite [Nature Protocols 2009; 4\(1\):44 & Genome Biology 2003; 4\(5\):P3](#) within any publication that makes use of any methods inspired by DAVID.

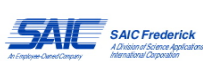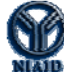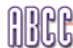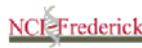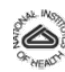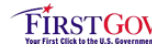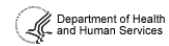

[Term of Service](#) | [Contact Us](#) | [Site Map](#)

|                          |                      |                                                              |           |                                                                                   |   |        |       |
|--------------------------|----------------------|--------------------------------------------------------------|-----------|-----------------------------------------------------------------------------------|---|--------|-------|
| <input type="checkbox"/> | <b>GOTERM_MF_FAT</b> | <a href="#">cis-trans isomerase activity</a>                 | <b>RT</b> |                                                                                   | 3 | 9.9E-1 | 1.0EO |
| <input type="checkbox"/> | <b>GOTERM_MF_FAT</b> | <a href="#">peptidyl-prolyl cis-trans isomerase activity</a> | <b>RT</b> |  | 3 | 9.9E-1 | 1.0EO |

were not clustered.

---

Please cite [Nature Protocols 2009; 4\(1\):44](#) & [Genome Biology 2003; 4\(5\):P3](#) within any publication that makes use of any methods inspired by **DAVID**.

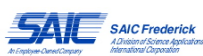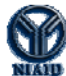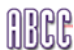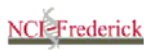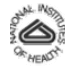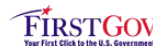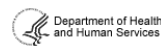

[Term of Service](#) | [Contact Us](#) | [Site Map](#)



## Functional Annotation Clustering

[Help and Manual](#)

Current Gene List: 3\_Random6

Current Background: Giardia intestinalis

3000 DAVID IDs

Options Classification Stringency Medium

Rerun using options

Create Sublist

83 Cluster(s)

[Download File](#)

|                          | Annotation Cluster   | Enrichment Score                                                                        |    |  | Count | P_Value | Benjamini |
|--------------------------|----------------------|-----------------------------------------------------------------------------------------|----|--|-------|---------|-----------|
| <input type="checkbox"/> | Annotation Cluster 1 | 1.37                                                                                    |    |  |       |         |           |
| <input type="checkbox"/> | SP_PIR_KEYWORDS      | <a href="#">membrane</a>                                                                | RT |  | 23    | 1.2E-2  | 7.3E-1    |
| <input type="checkbox"/> | GOTERM_CC_FAT        | <a href="#">intrinsic to membrane</a>                                                   | RT |  | 45    | 3.2E-2  | 9.8E-1    |
| <input type="checkbox"/> | GOTERM_CC_FAT        | <a href="#">integral to membrane</a>                                                    | RT |  | 45    | 3.2E-2  | 9.8E-1    |
| <input type="checkbox"/> | SP_PIR_KEYWORDS      | <a href="#">transmembrane</a>                                                           | RT |  | 24    | 3.4E-2  | 8.5E-1    |
| <input type="checkbox"/> | INTERPRO             | <a href="#">Amino acid transporter, transmembrane</a>                                   | RT |  | 8     | 3.5E-1  | 1.0E0     |
| <input type="checkbox"/> | Annotation Cluster 2 | 0.97                                                                                    |    |  |       |         |           |
| <input type="checkbox"/> | GOTERM_MF_FAT        | <a href="#">guanyl ribonucleotide binding</a>                                           | RT |  | 36    | 2.6E-2  | 1.0E0     |
| <input type="checkbox"/> | GOTERM_MF_FAT        | <a href="#">GTP binding</a>                                                             | RT |  | 36    | 2.6E-2  | 1.0E0     |
| <input type="checkbox"/> | GOTERM_MF_FAT        | <a href="#">guanyl nucleotide binding</a>                                               | RT |  | 36    | 2.6E-2  | 1.0E0     |
| <input type="checkbox"/> | INTERPRO             | <a href="#">Small GTP-binding protein</a>                                               | RT |  | 16    | 1.0E-1  | 1.0E0     |
| <input type="checkbox"/> | SP_PIR_KEYWORDS      | <a href="#">gtp-binding</a>                                                             | RT |  | 29    | 1.0E-1  | 9.8E-1    |
| <input type="checkbox"/> | GOTERM_MF_FAT        | <a href="#">GTPase activity</a>                                                         | RT |  | 12    | 4.0E-1  | 1.0E0     |
| <input type="checkbox"/> | GOTERM_BP_FAT        | <a href="#">small GTPase mediated signal transduction</a>                               | RT |  | 11    | 4.4E-1  | 1.0E0     |
| <input type="checkbox"/> | GOTERM_BP_FAT        | <a href="#">intracellular signaling cascade</a>                                         | RT |  | 13    | 6.0E-1  | 1.0E0     |
| <input type="checkbox"/> | Annotation Cluster 3 | 0.78                                                                                    |    |  |       |         |           |
| <input type="checkbox"/> | GOTERM_BP_FAT        | <a href="#">cellular homeostasis</a>                                                    | RT |  | 16    | 4.2E-2  | 1.0E0     |
| <input type="checkbox"/> | GOTERM_BP_FAT        | <a href="#">cell redox homeostasis</a>                                                  | RT |  | 15    | 6.0E-2  | 1.0E0     |
| <input type="checkbox"/> | GOTERM_BP_FAT        | <a href="#">homeostatic process</a>                                                     | RT |  | 16    | 8.1E-2  | 1.0E0     |
| <input type="checkbox"/> | INTERPRO             | <a href="#">Thioredoxin-like</a>                                                        | RT |  | 11    | 1.5E-1  | 1.0E0     |
| <input type="checkbox"/> | INTERPRO             | <a href="#">Thioredoxin fold</a>                                                        | RT |  | 16    | 2.5E-1  | 1.0E0     |
| <input type="checkbox"/> | GOTERM_MF_FAT        | <a href="#">antioxidant activity</a>                                                    | RT |  | 6     | 3.9E-1  | 1.0E0     |
| <input type="checkbox"/> | INTERPRO             | <a href="#">Thioredoxin core</a>                                                        | RT |  | 6     | 3.9E-1  | 1.0E0     |
| <input type="checkbox"/> | INTERPRO             | <a href="#">Alkyl hydroperoxide reductase/ Thiol specific antioxidant/ Mal allergen</a> | RT |  | 5     | 5.2E-1  | 1.0E0     |
| <input type="checkbox"/> | Annotation Cluster 4 | 0.77                                                                                    |    |  |       |         |           |
| <input type="checkbox"/> | INTERPRO             | <a href="#">Ankyrin</a>                                                                 | RT |  | 268   | 1.1E-1  | 1.0E0     |
| <input type="checkbox"/> | SMART                | <a href="#">ANK</a>                                                                     | RT |  | 268   | 2.1E-1  | 1.0E0     |
| <input type="checkbox"/> | SP_PIR_KEYWORDS      | <a href="#">ank repeat</a>                                                              | RT |  | 188   | 2.2E-1  | 9.9E-1    |
| <input type="checkbox"/> | Annotation Cluster 5 | 0.76                                                                                    |    |  |       |         |           |
| <input type="checkbox"/> | GOTERM_BP_FAT        | <a href="#">vesicle-mediated transport</a>                                              | RT |  | 24    | 1.1E-2  | 9.9E-1    |
| <input type="checkbox"/> | GOTERM_BP_FAT        | <a href="#">intracellular transport</a>                                                 | RT |  | 21    | 9.0E-2  | 1.0E0     |
| <input type="checkbox"/> | GOTERM_BP_FAT        | <a href="#">protein transport</a>                                                       | RT |  | 23    | 1.8E-1  | 1.0E0     |
| <input type="checkbox"/> | GOTERM_BP_FAT        | <a href="#">establishment of protein localization</a>                                   | RT |  | 23    | 1.8E-1  | 1.0E0     |
| <input type="checkbox"/> | GOTERM_CC_FAT        | <a href="#">Golgi apparatus</a>                                                         | RT |  | 9     | 2.0E-1  | 1.0E0     |
| <input type="checkbox"/> | GOTERM_BP_FAT        | <a href="#">protein localization</a>                                                    | RT |  | 23    | 2.4E-1  | 1.0E0     |
| <input type="checkbox"/> | GOTERM_BP_FAT        | <a href="#">cellular protein localization</a>                                           | RT |  | 16    | 2.9E-1  | 1.0E0     |
| <input type="checkbox"/> | GOTERM_BP_FAT        | <a href="#">cellular macromolecule localization</a>                                     | RT |  | 16    | 2.9E-1  | 1.0E0     |
| <input type="checkbox"/> | GOTERM_BP_FAT        | <a href="#">intracellular protein transport</a>                                         | RT |  | 16    | 2.9E-1  | 1.0E0     |
| <input type="checkbox"/> | GOTERM_CC_FAT        | <a href="#">coated membrane</a>                                                         | RT |  | 10    | 3.6E-1  | 1.0E0     |
| <input type="checkbox"/> | GOTERM_CC_FAT        | <a href="#">membrane coat</a>                                                           | RT |  | 10    | 3.6E-1  | 1.0E0     |
| <input type="checkbox"/> | Annotation Cluster 6 | 0.67                                                                                    |    |  |       |         |           |
| <input type="checkbox"/> | INTERPRO             | <a href="#">ATPase, AAA-type core</a>                                                   | RT |  | 19    | 1.2E-1  | 1.0E0     |
| <input type="checkbox"/> | INTERPRO             | <a href="#">ATPase, AAA+ type core</a>                                                  | RT |  | 46    | 2.5E-1  | 1.0E0     |
| <input type="checkbox"/> | SMART                | <a href="#">AAA</a>                                                                     | RT |  | 46    | 3.1E-1  | 1.0E0     |
| <input type="checkbox"/> | Annotation Cluster 7 | 0.63                                                                                    |    |  |       |         |           |
| <input type="checkbox"/> | INTERPRO             | <a href="#">Furin-like repeat</a>                                                       | RT |  | 118   | 9.5E-2  | 1.0E0     |

| <input type="checkbox"/> |                 |                                                                                                       |    |  | Count | P_Value | Benjamini |
|--------------------------|-----------------|-------------------------------------------------------------------------------------------------------|----|--|-------|---------|-----------|
| <input type="checkbox"/> | SMART           | <a href="#">FU</a>                                                                                    | RT |  | 118   | 1.5E-1  | 1.0E0     |
| <input type="checkbox"/> | INTERPRO        | <a href="#">EGF-like</a>                                                                              | RT |  | 116   | 3.3E-1  | 1.0E0     |
| <input type="checkbox"/> | INTERPRO        | <a href="#">Giardia variant-specific surface protein</a>                                              | RT |  | 143   | 3.5E-1  | 1.0E0     |
| <input type="checkbox"/> | SMART           | <a href="#">EGF</a>                                                                                   | RT |  | 116   | 4.4E-1  | 1.0E0     |
| Annotation Cluster 8     |                 | Enrichment Score: 0.53                                                                                |    |  | Count | P_Value | Benjamini |
| <input type="checkbox"/> | GOTERM_MF_FAT   | <a href="#">electron carrier activity</a>                                                             | RT |  | 19    | 3.9E-2  | 1.0E0     |
| <input type="checkbox"/> | GOTERM_MF_FAT   | <a href="#">4 iron, 4 sulfur cluster binding</a>                                                      | RT |  | 7     | 2.8E-1  | 1.0E0     |
| <input type="checkbox"/> | GOTERM_MF_FAT   | <a href="#">iron-sulfur cluster binding</a>                                                           | RT |  | 14    | 3.6E-1  | 1.0E0     |
| <input type="checkbox"/> | GOTERM_MF_FAT   | <a href="#">metal cluster binding</a>                                                                 | RT |  | 14    | 3.6E-1  | 1.0E0     |
| <input type="checkbox"/> | INTERPRO        | <a href="#">4Fe-4S ferredoxin, iron-sulphur binding, subgroup</a>                                     | RT |  | 7     | 4.5E-1  | 1.0E0     |
| <input type="checkbox"/> | INTERPRO        | <a href="#">4Fe-4S ferredoxin, iron-sulphur binding domain</a>                                        | RT |  | 7     | 4.5E-1  | 1.0E0     |
| <input type="checkbox"/> | INTERPRO        | <a href="#">4Fe-4S ferredoxin, iron-sulphur binding, conserved site</a>                               | RT |  | 5     | 6.9E-1  | 1.0E0     |
| Annotation Cluster 9     |                 | Enrichment Score: 0.51                                                                                |    |  | Count | P_Value | Benjamini |
| <input type="checkbox"/> | GOTERM_BP_FAT   | <a href="#">translational elongation</a>                                                              | RT |  | 7     | 1.3E-1  | 1.0E0     |
| <input type="checkbox"/> | INTERPRO        | <a href="#">Translation elongation factor EFTu/EF1A, domain 2</a>                                     | RT |  | 5     | 3.2E-1  | 1.0E0     |
| <input type="checkbox"/> | SP_PIR_KEYWORDS | <a href="#">elongation factor</a>                                                                     | RT |  | 6     | 4.0E-1  | 9.9E-1    |
| <input type="checkbox"/> | GOTERM_MF_FAT   | <a href="#">translation elongation factor activity</a>                                                | RT |  | 6     | 5.6E-1  | 1.0E0     |
| Annotation Cluster 10    |                 | Enrichment Score: 0.47                                                                                |    |  | Count | P_Value | Benjamini |
| <input type="checkbox"/> | GOTERM_MF_FAT   | <a href="#">transition metal ion binding</a>                                                          | RT |  | 116   | 2.1E-1  | 1.0E0     |
| <input type="checkbox"/> | SP_PIR_KEYWORDS | <a href="#">zinc-finger</a>                                                                           | RT |  | 40    | 2.6E-1  | 9.8E-1    |
| <input type="checkbox"/> | GOTERM_MF_FAT   | <a href="#">zinc ion binding</a>                                                                      | RT |  | 93    | 2.9E-1  | 1.0E0     |
| <input type="checkbox"/> | INTERPRO        | <a href="#">Zinc finger, RING-type</a>                                                                | RT |  | 43    | 3.0E-1  | 1.0E0     |
| <input type="checkbox"/> | SP_PIR_KEYWORDS | <a href="#">zinc</a>                                                                                  | RT |  | 53    | 3.4E-1  | 9.9E-1    |
| <input type="checkbox"/> | SMART           | <a href="#">RING</a>                                                                                  | RT |  | 43    | 3.6E-1  | 1.0E0     |
| <input type="checkbox"/> | INTERPRO        | <a href="#">Zinc finger, C3HC4 RING-type</a>                                                          | RT |  | 23    | 3.8E-1  | 1.0E0     |
| <input type="checkbox"/> | SP_PIR_KEYWORDS | <a href="#">metal-binding</a>                                                                         | RT |  | 62    | 3.9E-1  | 9.9E-1    |
| <input type="checkbox"/> | GOTERM_MF_FAT   | <a href="#">ion binding</a>                                                                           | RT |  | 153   | 4.3E-1  | 1.0E0     |
| <input type="checkbox"/> | GOTERM_MF_FAT   | <a href="#">cation binding</a>                                                                        | RT |  | 153   | 4.3E-1  | 1.0E0     |
| <input type="checkbox"/> | GOTERM_MF_FAT   | <a href="#">metal ion binding</a>                                                                     | RT |  | 151   | 4.4E-1  | 1.0E0     |
| Annotation Cluster 11    |                 | Enrichment Score: 0.43                                                                                |    |  | Count | P_Value | Benjamini |
| <input type="checkbox"/> | INTERPRO        | <a href="#">ATPase, P-type, ATPase-associated region</a>                                              | RT |  | 10    | 1.0E-1  | 1.0E0     |
| <input type="checkbox"/> | GOTERM_BP_FAT   | <a href="#">purine nucleotide metabolic process</a>                                                   | RT |  | 22    | 1.1E-1  | 1.0E0     |
| <input type="checkbox"/> | GOTERM_BP_FAT   | <a href="#">purine nucleotide biosynthetic process</a>                                                | RT |  | 21    | 1.4E-1  | 1.0E0     |
| <input type="checkbox"/> | GOTERM_BP_FAT   | <a href="#">nucleobase, nucleoside and nucleotide biosynthetic process</a>                            | RT |  | 29    | 1.4E-1  | 1.0E0     |
| <input type="checkbox"/> | GOTERM_BP_FAT   | <a href="#">nucleobase, nucleoside, nucleotide and nucleic acid biosynthetic process</a>              | RT |  | 29    | 1.4E-1  | 1.0E0     |
| <input type="checkbox"/> | GOTERM_BP_FAT   | <a href="#">nucleotide biosynthetic process</a>                                                       | RT |  | 27    | 1.5E-1  | 1.0E0     |
| <input type="checkbox"/> | GOTERM_BP_FAT   | <a href="#">purine ribonucleotide metabolic process</a>                                               | RT |  | 20    | 1.7E-1  | 1.0E0     |
| <input type="checkbox"/> | GOTERM_BP_FAT   | <a href="#">ribonucleotide metabolic process</a>                                                      | RT |  | 20    | 1.7E-1  | 1.0E0     |
| <input type="checkbox"/> | GOTERM_BP_FAT   | <a href="#">ribonucleotide biosynthetic process</a>                                                   | RT |  | 20    | 1.7E-1  | 1.0E0     |
| <input type="checkbox"/> | GOTERM_BP_FAT   | <a href="#">purine ribonucleotide biosynthetic process</a>                                            | RT |  | 20    | 1.7E-1  | 1.0E0     |
| <input type="checkbox"/> | GOTERM_BP_FAT   | <a href="#">ATP metabolic process</a>                                                                 | RT |  | 18    | 1.9E-1  | 1.0E0     |
| <input type="checkbox"/> | GOTERM_BP_FAT   | <a href="#">ATP biosynthetic process</a>                                                              | RT |  | 18    | 1.9E-1  | 1.0E0     |
| <input type="checkbox"/> | GOTERM_MF_FAT   | <a href="#">ATPase activity, coupled to transmembrane movement of ions, phosphorylative mechanism</a> | RT |  | 10    | 1.9E-1  | 1.0E0     |
| <input type="checkbox"/> | INTERPRO        | <a href="#">ATPase, P-type, K/Mg/Cd/Cu/Zn/Na/Ca/Na/H-transporter</a>                                  | RT |  | 10    | 2.0E-1  | 1.0E0     |
| <input type="checkbox"/> | GOTERM_BP_FAT   | <a href="#">purine nucleoside triphosphate biosynthetic process</a>                                   | RT |  | 19    | 2.1E-1  | 1.0E0     |
| <input type="checkbox"/> | GOTERM_BP_FAT   | <a href="#">nucleoside triphosphate biosynthetic process</a>                                          | RT |  | 19    | 2.1E-1  | 1.0E0     |
| <input type="checkbox"/> | GOTERM_BP_FAT   | <a href="#">purine nucleoside triphosphate metabolic process</a>                                      | RT |  | 19    | 2.1E-1  | 1.0E0     |
| <input type="checkbox"/> | GOTERM_BP_FAT   | <a href="#">nucleoside triphosphate metabolic process</a>                                             | RT |  | 19    | 2.1E-1  | 1.0E0     |
| <input type="checkbox"/> | GOTERM_BP_FAT   | <a href="#">purine ribonucleoside triphosphate metabolic process</a>                                  | RT |  | 19    | 2.1E-1  | 1.0E0     |
| <input type="checkbox"/> | GOTERM_BP_FAT   | <a href="#">purine ribonucleoside triphosphate biosynthetic process</a>                               | RT |  | 19    | 2.1E-1  | 1.0E0     |
| <input type="checkbox"/> | GOTERM_BP_FAT   | <a href="#">ribonucleoside triphosphate metabolic process</a>                                         | RT |  | 19    | 2.1E-1  | 1.0E0     |
| <input type="checkbox"/> | GOTERM_BP_FAT   | <a href="#">ribonucleoside triphosphate biosynthetic process</a>                                      | RT |  | 19    | 2.1E-1  | 1.0E0     |
| <input type="checkbox"/> | GOTERM_BP_FAT   | <a href="#">nitrogen compound biosynthetic process</a>                                                | RT |  | 32    | 2.4E-1  | 1.0E0     |
| <input type="checkbox"/> | INTERPRO        | <a href="#">ATPase, P-type phosphorylation site</a>                                                   | RT |  | 7     | 2.9E-1  | 1.0E0     |

|                          |                 |                                                                                                                |    |  |       |         |           |
|--------------------------|-----------------|----------------------------------------------------------------------------------------------------------------|----|--|-------|---------|-----------|
| <input type="checkbox"/> | GOTERM_MF_FAT   | <a href="#">ATPase activity, coupled to transmembrane movement of ions</a>                                     | RT |  | 14    | 3.6E-1  | 1.0E0     |
| <input type="checkbox"/> | KEGG_PATHWAY    | <a href="#">Oxidative phosphorylation</a>                                                                      | RT |  | 9     | 4.3E-1  | 9.9E-1    |
| <input type="checkbox"/> | GOTERM_CC_FAT   | <a href="#">proton-transporting two-sector ATPase complex, proton-transporting domain</a>                      | RT |  | 5     | 4.6E-1  | 1.0E0     |
| <input type="checkbox"/> | SP_PIR_KEYWORDS | <a href="#">phosphoprotein</a>                                                                                 | RT |  | 4     | 4.6E-1  | 9.8E-1    |
| <input type="checkbox"/> | GOTERM_MF_FAT   | <a href="#">ATPase activity, coupled to transmembrane movement of substances</a>                               | RT |  | 18    | 4.8E-1  | 1.0E0     |
| <input type="checkbox"/> | GOTERM_MF_FAT   | <a href="#">ATPase activity, coupled to movement of substances</a>                                             | RT |  | 18    | 4.8E-1  | 1.0E0     |
| <input type="checkbox"/> | GOTERM_MF_FAT   | <a href="#">hydrolase activity, acting on acid anhydrides, catalyzing transmembrane movement of substances</a> | RT |  | 19    | 5.1E-1  | 1.0E0     |
| <input type="checkbox"/> | GOTERM_MF_FAT   | <a href="#">primary active transmembrane transporter activity</a>                                              | RT |  | 19    | 5.1E-1  | 1.0E0     |
| <input type="checkbox"/> | GOTERM_MF_FAT   | <a href="#">P-P-bond-hydrolysis-driven transmembrane transporter activity</a>                                  | RT |  | 19    | 5.1E-1  | 1.0E0     |
| <input type="checkbox"/> | GOTERM_MF_FAT   | <a href="#">inorganic cation transmembrane transporter activity</a>                                            | RT |  | 12    | 5.1E-1  | 1.0E0     |
| <input type="checkbox"/> | GOTERM_BP_FAT   | <a href="#">transmembrane transport</a>                                                                        | RT |  | 13    | 6.0E-1  | 1.0E0     |
| <input type="checkbox"/> | GOTERM_CC_FAT   | <a href="#">proton-transporting V-type ATPase, V0 domain</a>                                                   | RT |  | 4     | 6.1E-1  | 1.0E0     |
| <input type="checkbox"/> | PIR_SUPERFAMILY | PIRSF001292: vacuolar H(+)-transporting ATPase 16K chain                                                       | RT |  | 3     | 6.2E-1  | 1.0E0     |
| <input type="checkbox"/> | INTERPRO        | <a href="#">ATPase, F0/V0 complex, subunit C</a>                                                               | RT |  | 3     | 6.3E-1  | 1.0E0     |
| <input type="checkbox"/> | INTERPRO        | <a href="#">ATPase, V0 complex, proteolipid subunit C</a>                                                      | RT |  | 3     | 6.3E-1  | 1.0E0     |
| <input type="checkbox"/> | GOTERM_CC_FAT   | <a href="#">proton-transporting two-sector ATPase complex</a>                                                  | RT |  | 9     | 6.8E-1  | 1.0E0     |
| <input type="checkbox"/> | GOTERM_BP_FAT   | <a href="#">oxidative phosphorylation</a>                                                                      | RT |  | 8     | 7.1E-1  | 1.0E0     |
| <input type="checkbox"/> | GOTERM_BP_FAT   | <a href="#">ATP synthesis coupled proton transport</a>                                                         | RT |  | 8     | 7.1E-1  | 1.0E0     |
| <input type="checkbox"/> | GOTERM_BP_FAT   | <a href="#">energy coupled proton transport, down electrochemical gradient</a>                                 | RT |  | 8     | 7.1E-1  | 1.0E0     |
| <input type="checkbox"/> | GOTERM_BP_FAT   | <a href="#">generation of precursor metabolites and energy</a>                                                 | RT |  | 15    | 7.2E-1  | 1.0E0     |
| <input type="checkbox"/> | GOTERM_BP_FAT   | <a href="#">hydrogen transport</a>                                                                             | RT |  | 9     | 7.2E-1  | 1.0E0     |
| <input type="checkbox"/> | GOTERM_BP_FAT   | <a href="#">proton transport</a>                                                                               | RT |  | 9     | 7.2E-1  | 1.0E0     |
| <input type="checkbox"/> | GOTERM_MF_FAT   | <a href="#">hydrogen ion transmembrane transporter activity</a>                                                | RT |  | 9     | 7.5E-1  | 1.0E0     |
| <input type="checkbox"/> | GOTERM_MF_FAT   | <a href="#">monovalent inorganic cation transmembrane transporter activity</a>                                 | RT |  | 9     | 7.5E-1  | 1.0E0     |
| <input type="checkbox"/> | GOTERM_BP_FAT   | <a href="#">ion transmembrane transport</a>                                                                    | RT |  | 8     | 8.0E-1  | 1.0E0     |
| <input type="checkbox"/> | GOTERM_BP_FAT   | <a href="#">monovalent inorganic cation transport</a>                                                          | RT |  | 9     | 8.0E-1  | 1.0E0     |
| <input type="checkbox"/> | GOTERM_BP_FAT   | <a href="#">ion transport</a>                                                                                  | RT |  | 13    | 8.3E-1  | 1.0E0     |
| <input type="checkbox"/> | GOTERM_BP_FAT   | <a href="#">cation transport</a>                                                                               | RT |  | 13    | 8.3E-1  | 1.0E0     |
| <input type="checkbox"/> | GOTERM_CC_FAT   | <a href="#">proton-transporting V-type ATPase complex</a>                                                      | RT |  | 5     | 8.5E-1  | 1.0E0     |
| <input type="checkbox"/> | SP_PIR_KEYWORDS | <a href="#">ion transport</a>                                                                                  | RT |  | 3     | 9.1E-1  | 1.0E0     |
| <input type="checkbox"/> | GOTERM_MF_FAT   | <a href="#">proton-transporting ATPase activity, rotational mechanism</a>                                      | RT |  | 3     | 9.8E-1  | 1.0E0     |
| <input type="checkbox"/> | GOTERM_CC_FAT   | <a href="#">proton-transporting two-sector ATPase complex, catalytic domain</a>                                | RT |  | 3     | 9.8E-1  | 1.0E0     |
| Annotation Cluster 12    |                 | Enrichment Score: 0.4                                                                                          |    |  | Count | P_Value | Benjamini |
| <input type="checkbox"/> | GOTERM_MF_FAT   | <a href="#">translation factor activity, nucleic acid binding</a>                                              | RT |  | 22    | 2.6E-1  | 1.0E0     |
| <input type="checkbox"/> | SP_PIR_KEYWORDS | <a href="#">Initiation factor</a>                                                                              | RT |  | 13    | 4.6E-1  | 9.8E-1    |
| <input type="checkbox"/> | GOTERM_MF_FAT   | <a href="#">translation initiation factor activity</a>                                                         | RT |  | 16    | 5.2E-1  | 1.0E0     |
| Annotation Cluster 13    |                 | Enrichment Score: 0.4                                                                                          |    |  | Count | P_Value | Benjamini |
| <input type="checkbox"/> | INTERPRO        | <a href="#">Small GTP-binding protein</a>                                                                      | RT |  | 16    | 1.0E-1  | 1.0E0     |
| <input type="checkbox"/> | INTERPRO        | <a href="#">Ras</a>                                                                                            | RT |  | 9     | 4.0E-1  | 1.0E0     |
| <input type="checkbox"/> | GOTERM_BP_FAT   | <a href="#">small GTPase mediated signal transduction</a>                                                      | RT |  | 11    | 4.4E-1  | 1.0E0     |
| <input type="checkbox"/> | INTERPRO        | <a href="#">Ras small GTPase, Rab type</a>                                                                     | RT |  | 4     | 4.5E-1  | 1.0E0     |
| <input type="checkbox"/> | SMART           | <a href="#">RAB</a>                                                                                            | RT |  | 4     | 4.7E-1  | 1.0E0     |
| <input type="checkbox"/> | PIR_SUPERFAMILY | PIRSF001710: Ras-related protein Rab                                                                           | RT |  | 5     | 5.0E-1  | 1.0E0     |
| <input type="checkbox"/> | INTERPRO        | <a href="#">Ras GTPase</a>                                                                                     | RT |  | 9     | 5.4E-1  | 1.0E0     |
| <input type="checkbox"/> | GOTERM_BP_FAT   | <a href="#">intracellular signaling cascade</a>                                                                | RT |  | 13    | 6.0E-1  | 1.0E0     |
| Annotation Cluster 14    |                 | Enrichment Score: 0.4                                                                                          |    |  | Count | P_Value | Benjamini |
| <input type="checkbox"/> | INTERPRO        | <a href="#">Thioredoxin-like</a>                                                                               | RT |  | 11    | 1.5E-1  | 1.0E0     |
| <input type="checkbox"/> | INTERPRO        | <a href="#">Thioredoxin domain</a>                                                                             | RT |  | 5     | 5.2E-1  | 1.0E0     |
| <input type="checkbox"/> | INTERPRO        | <a href="#">Thioredoxin, conserved site</a>                                                                    | RT |  | 5     | 5.2E-1  | 1.0E0     |
| <input type="checkbox"/> | INTERPRO        | <a href="#">Thioredoxin-like subdomain</a>                                                                     | RT |  | 4     | 6.6E-1  | 1.0E0     |
| Annotation Cluster 15    |                 | Enrichment Score: 0.36                                                                                         |    |  | Count | P_Value | Benjamini |
| <input type="checkbox"/> | GOTERM_CC_FAT   | <a href="#">endomembrane system</a>                                                                            | RT |  | 13    | 9.0E-2  | 1.0E0     |
| <input type="checkbox"/> | GOTERM_CC_FAT   | <a href="#">Golgi apparatus</a>                                                                                | RT |  | 9     | 2.0E-1  | 1.0E0     |

| <input type="checkbox"/> |                       |                                                                                                       |    |  | Count | P_Value | Benjamini |
|--------------------------|-----------------------|-------------------------------------------------------------------------------------------------------|----|--|-------|---------|-----------|
| <input type="checkbox"/> | GOTERM_CC_FAT         | <a href="#">Golgi apparatus part</a>                                                                  | RT |  | 7     | 2.3E-1  | 1.0E0     |
| <input type="checkbox"/> | GOTERM_CC_FAT         | <a href="#">coated membrane</a>                                                                       | RT |  | 10    | 3.6E-1  | 1.0E0     |
| <input type="checkbox"/> | GOTERM_CC_FAT         | <a href="#">membrane coat</a>                                                                         | RT |  | 10    | 3.6E-1  | 1.0E0     |
| <input type="checkbox"/> | GOTERM_CC_FAT         | <a href="#">organelle membrane</a>                                                                    | RT |  | 8     | 4.2E-1  | 1.0E0     |
| <input type="checkbox"/> | GOTERM_CC_FAT         | <a href="#">cytoplasmic vesicle part</a>                                                              | RT |  | 5     | 4.6E-1  | 1.0E0     |
| <input type="checkbox"/> | GOTERM_CC_FAT         | <a href="#">cytoplasmic membrane-bounded vesicle</a>                                                  | RT |  | 5     | 4.6E-1  | 1.0E0     |
| <input type="checkbox"/> | GOTERM_CC_FAT         | <a href="#">vesicle membrane</a>                                                                      | RT |  | 5     | 4.6E-1  | 1.0E0     |
| <input type="checkbox"/> | GOTERM_CC_FAT         | <a href="#">cytoplasmic vesicle</a>                                                                   | RT |  | 5     | 4.6E-1  | 1.0E0     |
| <input type="checkbox"/> | GOTERM_CC_FAT         | <a href="#">coated vesicle membrane</a>                                                               | RT |  | 5     | 4.6E-1  | 1.0E0     |
| <input type="checkbox"/> | GOTERM_CC_FAT         | <a href="#">cytoplasmic vesicle membrane</a>                                                          | RT |  | 5     | 4.6E-1  | 1.0E0     |
| <input type="checkbox"/> | GOTERM_CC_FAT         | <a href="#">vesicle</a>                                                                               | RT |  | 5     | 4.6E-1  | 1.0E0     |
| <input type="checkbox"/> | GOTERM_CC_FAT         | <a href="#">membrane-bounded vesicle</a>                                                              | RT |  | 5     | 4.6E-1  | 1.0E0     |
| <input type="checkbox"/> | GOTERM_CC_FAT         | <a href="#">coated vesicle</a>                                                                        | RT |  | 5     | 4.6E-1  | 1.0E0     |
| <input type="checkbox"/> | GOTERM_CC_FAT         | <a href="#">vesicle coat</a>                                                                          | RT |  | 5     | 4.6E-1  | 1.0E0     |
| <input type="checkbox"/> | GOTERM_BP_FAT         | <a href="#">ER to Golgi vesicle-mediated transport</a>                                                | RT |  | 5     | 4.9E-1  | 1.0E0     |
| <input type="checkbox"/> | GOTERM_BP_FAT         | <a href="#">Golgi vesicle transport</a>                                                               | RT |  | 5     | 4.9E-1  | 1.0E0     |
| <input type="checkbox"/> | GOTERM_CC_FAT         | <a href="#">transport vesicle membrane</a>                                                            | RT |  | 4     | 6.1E-1  | 1.0E0     |
| <input type="checkbox"/> | GOTERM_CC_FAT         | <a href="#">transport vesicle</a>                                                                     | RT |  | 4     | 6.1E-1  | 1.0E0     |
| <input type="checkbox"/> | INTERPRO              | <a href="#">Clathrin/coatomer adaptor, adaptin-like, N-terminal</a>                                   | RT |  | 4     | 6.6E-1  | 1.0E0     |
| <input type="checkbox"/> | GOTERM_CC_FAT         | <a href="#">ER to Golgi transport vesicle membrane</a>                                                | RT |  | 3     | 7.7E-1  | 1.0E0     |
| <input type="checkbox"/> | GOTERM_CC_FAT         | <a href="#">ER to Golgi transport vesicle</a>                                                         | RT |  | 3     | 7.7E-1  | 1.0E0     |
| <input type="checkbox"/> | GOTERM_CC_FAT         | <a href="#">COPII vesicle coat</a>                                                                    | RT |  | 3     | 7.7E-1  | 1.0E0     |
|                          | Annotation Cluster 16 | Enrichment Score: 0.32                                                                                |    |  | Count | P_Value | Benjamini |
| <input type="checkbox"/> | INTERPRO              | <a href="#">ATPase, P-type, ATPase-associated region</a>                                              | RT |  | 10    | 1.0E-1  | 1.0E0     |
| <input type="checkbox"/> | GOTERM_MF_FAT         | <a href="#">ATPase activity, coupled to transmembrane movement of ions, phosphorylative mechanism</a> | RT |  | 10    | 1.9E-1  | 1.0E0     |
| <input type="checkbox"/> | INTERPRO              | <a href="#">ATPase, P-type, K/Mg/Cd/Cu/Zn/Na/Ca/Na/H-transporter</a>                                  | RT |  | 10    | 2.0E-1  | 1.0E0     |
| <input type="checkbox"/> | INTERPRO              | <a href="#">ATPase, P-type phosphorylation site</a>                                                   | RT |  | 7     | 2.9E-1  | 1.0E0     |
| <input type="checkbox"/> | GOTERM_MF_FAT         | <a href="#">lipid transporter activity</a>                                                            | RT |  | 5     | 5.1E-1  | 1.0E0     |
| <input type="checkbox"/> | GOTERM_BP_FAT         | <a href="#">lipid transport</a>                                                                       | RT |  | 4     | 6.4E-1  | 1.0E0     |
| <input type="checkbox"/> | GOTERM_BP_FAT         | <a href="#">lipid localization</a>                                                                    | RT |  | 4     | 6.4E-1  | 1.0E0     |
| <input type="checkbox"/> | GOTERM_MF_FAT         | <a href="#">aminophospholipid transporter activity</a>                                                | RT |  | 4     | 6.6E-1  | 1.0E0     |
| <input type="checkbox"/> | GOTERM_MF_FAT         | <a href="#">phospholipid transporter activity</a>                                                     | RT |  | 4     | 6.6E-1  | 1.0E0     |
| <input type="checkbox"/> | GOTERM_MF_FAT         | <a href="#">phospholipid-translocating ATPase activity</a>                                            | RT |  | 4     | 6.6E-1  | 1.0E0     |
| <input type="checkbox"/> | GOTERM_BP_FAT         | <a href="#">phospholipid transport</a>                                                                | RT |  | 3     | 7.9E-1  | 1.0E0     |
| <input type="checkbox"/> | INTERPRO              | <a href="#">ATPase, P-type, phospholipid-translocating, flippase</a>                                  | RT |  | 3     | 8.1E-1  | 1.0E0     |
| <input type="checkbox"/> | SP_PIR_KEYWORDS       | <a href="#">magnesium</a>                                                                             | RT |  | 7     | 8.3E-1  | 9.9E-1    |
| <input type="checkbox"/> | GOTERM_MF_FAT         | <a href="#">magnesium ion binding</a>                                                                 | RT |  | 8     | 8.8E-1  | 1.0E0     |
|                          | Annotation Cluster 17 | Enrichment Score: 0.32                                                                                |    |  | Count | P_Value | Benjamini |
| <input type="checkbox"/> | INTERPRO              | <a href="#">Protein synthesis factor, GTP-binding</a>                                                 | RT |  | 7     | 2.9E-1  | 1.0E0     |
| <input type="checkbox"/> | PIR_SUPERFAMILY       | PIRSF003007: translation elongation factor Tu                                                         | RT |  | 3     | 6.2E-1  | 1.0E0     |
| <input type="checkbox"/> | INTERPRO              | <a href="#">Translation elongation factor EFTu/EF1A, C-terminal</a>                                   | RT |  | 3     | 6.3E-1  | 1.0E0     |
|                          | Annotation Cluster 18 | Enrichment Score: 0.3                                                                                 |    |  | Count | P_Value | Benjamini |
| <input type="checkbox"/> | GOTERM_MF_FAT         | <a href="#">peptidase activity</a>                                                                    | RT |  | 51    | 2.2E-1  | 1.0E0     |
| <input type="checkbox"/> | SP_PIR_KEYWORDS       | <a href="#">Protease</a>                                                                              | RT |  | 25    | 2.3E-1  | 9.8E-1    |
| <input type="checkbox"/> | GOTERM_BP_FAT         | <a href="#">proteolysis</a>                                                                           | RT |  | 54    | 3.2E-1  | 1.0E0     |
| <input type="checkbox"/> | INTERPRO              | <a href="#">Peptidase, cysteine peptidase active site</a>                                             | RT |  | 20    | 3.8E-1  | 1.0E0     |
| <input type="checkbox"/> | GOTERM_MF_FAT         | <a href="#">peptidase activity, acting on L-amino acid peptides</a>                                   | RT |  | 42    | 4.3E-1  | 1.0E0     |
| <input type="checkbox"/> | GOTERM_MF_FAT         | <a href="#">endopeptidase activity</a>                                                                | RT |  | 29    | 4.3E-1  | 1.0E0     |
| <input type="checkbox"/> | GOTERM_MF_FAT         | <a href="#">cysteine-type endopeptidase activity</a>                                                  | RT |  | 15    | 5.9E-1  | 1.0E0     |
| <input type="checkbox"/> | GOTERM_MF_FAT         | <a href="#">cysteine-type peptidase activity</a>                                                      | RT |  | 17    | 7.8E-1  | 1.0E0     |
| <input type="checkbox"/> | SP_PIR_KEYWORDS       | <a href="#">thiol protease</a>                                                                        | RT |  | 6     | 8.2E-1  | 9.9E-1    |
| <input type="checkbox"/> | INTERPRO              | <a href="#">Peptidase C1A, papain</a>                                                                 | RT |  | 15    | 8.2E-1  | 1.0E0     |
| <input type="checkbox"/> | INTERPRO              | <a href="#">Peptidase C1A, papain C-terminal</a>                                                      | RT |  | 15    | 8.2E-1  | 1.0E0     |
| <input type="checkbox"/> | SMART                 | <a href="#">Pept_C1</a>                                                                               | RT |  | 15    | 8.5E-1  | 1.0E0     |
|                          | Annotation Cluster 19 | Enrichment Score: 0.3                                                                                 |    |  | Count | P_Value | Benjamini |
| <input type="checkbox"/> | GOTERM_MF_FAT         | <a href="#">vitamin binding</a>                                                                       | RT |  | 9     | 2.6E-1  | 1.0E0     |

|                          |                       |                                                                                                   |    |  |       |         |           |
|--------------------------|-----------------------|---------------------------------------------------------------------------------------------------|----|--|-------|---------|-----------|
| <input type="checkbox"/> | INTERPRO              | <a href="#">Pyridoxal phosphate-dependent transferase, major region, subdomain 1</a>              | RT |  | 7     | 2.9E-1  | 1.0E0     |
| <input type="checkbox"/> | GOTERM_MF_FAT         | <a href="#">pyridoxal phosphate binding</a>                                                       | RT |  | 8     | 3.4E-1  | 1.0E0     |
| <input type="checkbox"/> | GOTERM_MF_FAT         | <a href="#">vitamin B6 binding</a>                                                                | RT |  | 8     | 3.4E-1  | 1.0E0     |
| <input type="checkbox"/> | INTERPRO              | <a href="#">Aminotransferase, class V/Cysteine desulfurase</a>                                    | RT |  | 3     | 6.3E-1  | 1.0E0     |
| <input type="checkbox"/> | INTERPRO              | <a href="#">Aminotransferase, class I and II</a>                                                  | RT |  | 4     | 6.6E-1  | 1.0E0     |
| <input type="checkbox"/> | GOTERM_MF_FAT         | <a href="#">transferase activity, transferring nitrogenous groups</a>                             | RT |  | 5     | 6.8E-1  | 1.0E0     |
| <input type="checkbox"/> | GOTERM_MF_FAT         | <a href="#">transaminase activity</a>                                                             | RT |  | 3     | 9.0E-1  | 1.0E0     |
| <input type="checkbox"/> | SP_PIR_KEYWORDS       | <a href="#">Aminotransferase</a>                                                                  | RT |  | 3     | 9.1E-1  | 1.0E0     |
|                          | Annotation Cluster 20 | Enrichment Score: 0.29                                                                            |    |  | Count | P_Value | Benjamini |
| <input type="checkbox"/> | KEGG_PATHWAY          | <a href="#">Purine metabolism</a>                                                                 | RT |  | 20    | 3.8E-1  | 1.0E0     |
| <input type="checkbox"/> | SP_PIR_KEYWORDS       | <a href="#">nucleotidyltransferase</a>                                                            | RT |  | 17    | 3.9E-1  | 9.9E-1    |
| <input type="checkbox"/> | KEGG_PATHWAY          | <a href="#">RNA polymerase</a>                                                                    | RT |  | 12    | 4.0E-1  | 9.9E-1    |
| <input type="checkbox"/> | GOTERM_BP_FAT         | <a href="#">transcription</a>                                                                     | RT |  | 17    | 4.1E-1  | 1.0E0     |
| <input type="checkbox"/> | KEGG_PATHWAY          | <a href="#">Pyrimidine metabolism</a>                                                             | RT |  | 20    | 4.7E-1  | 9.9E-1    |
| <input type="checkbox"/> | SP_PIR_KEYWORDS       | <a href="#">dna-directed rna polymerase</a>                                                       | RT |  | 9     | 6.7E-1  | 9.9E-1    |
| <input type="checkbox"/> | GOTERM_MF_FAT         | <a href="#">DNA-directed RNA polymerase activity</a>                                              | RT |  | 13    | 8.0E-1  | 1.0E0     |
| <input type="checkbox"/> | GOTERM_MF_FAT         | <a href="#">RNA polymerase activity</a>                                                           | RT |  | 13    | 8.5E-1  | 1.0E0     |
|                          | Annotation Cluster 21 | Enrichment Score: 0.28                                                                            |    |  | Count | P_Value | Benjamini |
| <input type="checkbox"/> | INTERPRO              | <a href="#">ABC transporter, conserved site</a>                                                   | RT |  | 15    | 4.1E-1  | 1.0E0     |
| <input type="checkbox"/> | INTERPRO              | <a href="#">ABC transporter-like</a>                                                              | RT |  | 15    | 5.1E-1  | 1.0E0     |
| <input type="checkbox"/> | COG_ONTOLOGY          | <a href="#">Defense mechanisms</a>                                                                | RT |  | 14    | 6.9E-1  | 1.0E0     |
|                          | Annotation Cluster 22 | Enrichment Score: 0.27                                                                            |    |  | Count | P_Value | Benjamini |
| <input type="checkbox"/> | INTERPRO              | <a href="#">AMP-dependent synthetase and ligase</a>                                               | RT |  | 6     | 3.9E-1  | 1.0E0     |
| <input type="checkbox"/> | COG_ONTOLOGY          | <a href="#">Lipid metabolism</a>                                                                  | RT |  | 10    | 4.0E-1  | 9.9E-1    |
| <input type="checkbox"/> | GOTERM_MF_FAT         | <a href="#">long-chain-fatty-acid-CoA ligase activity</a>                                         | RT |  | 4     | 6.6E-1  | 1.0E0     |
| <input type="checkbox"/> | GOTERM_MF_FAT         | <a href="#">fatty-acid ligase activity</a>                                                        | RT |  | 4     | 6.6E-1  | 1.0E0     |
| <input type="checkbox"/> | GOTERM_MF_FAT         | <a href="#">ligase activity, forming carbon-sulfur bonds</a>                                      | RT |  | 4     | 6.6E-1  | 1.0E0     |
|                          | Annotation Cluster 23 | Enrichment Score: 0.26                                                                            |    |  | Count | P_Value | Benjamini |
| <input type="checkbox"/> | KEGG_PATHWAY          | <a href="#">Mismatch repair</a>                                                                   | RT |  | 10    | 3.4E-1  | 1.0E0     |
| <input type="checkbox"/> | KEGG_PATHWAY          | <a href="#">Nucleotide excision repair</a>                                                        | RT |  | 10    | 5.7E-1  | 9.9E-1    |
| <input type="checkbox"/> | KEGG_PATHWAY          | <a href="#">DNA replication</a>                                                                   | RT |  | 11    | 8.3E-1  | 1.0E0     |
|                          | Annotation Cluster 24 | Enrichment Score: 0.25                                                                            |    |  | Count | P_Value | Benjamini |
| <input type="checkbox"/> | INTERPRO              | <a href="#">Protein of unknown function DUF6, transmembrane</a>                                   | RT |  | 4     | 4.5E-1  | 1.0E0     |
| <input type="checkbox"/> | PIR_SUPERFAMILY       | PIRSF036436; UCPO36436                                                                            | RT |  | 3     | 6.2E-1  | 1.0E0     |
| <input type="checkbox"/> | INTERPRO              | <a href="#">Uncharacterised conserved protein UCPO36436, nucleotide-sugar transporter-related</a> | RT |  | 3     | 6.3E-1  | 1.0E0     |
|                          | Annotation Cluster 25 | Enrichment Score: 0.24                                                                            |    |  | Count | P_Value | Benjamini |
| <input type="checkbox"/> | GOTERM_MF_FAT         | <a href="#">exopeptidase activity</a>                                                             | RT |  | 8     | 4.9E-1  | 1.0E0     |
| <input type="checkbox"/> | GOTERM_MF_FAT         | <a href="#">dipeptidase activity</a>                                                              | RT |  | 3     | 6.3E-1  | 1.0E0     |
| <input type="checkbox"/> | SP_PIR_KEYWORDS       | <a href="#">dipeptidase</a>                                                                       | RT |  | 3     | 6.4E-1  | 9.9E-1    |
|                          | Annotation Cluster 26 | Enrichment Score: 0.23                                                                            |    |  | Count | P_Value | Benjamini |
| <input type="checkbox"/> | GOTERM_MF_FAT         | <a href="#">metallopeptidase activity</a>                                                         | RT |  | 10    | 3.1E-1  | 1.0E0     |
| <input type="checkbox"/> | GOTERM_MF_FAT         | <a href="#">metalloexopeptidase activity</a>                                                      | RT |  | 6     | 3.9E-1  | 1.0E0     |
| <input type="checkbox"/> | INTERPRO              | <a href="#">Peptidase M24, structural domain</a>                                                  | RT |  | 4     | 4.5E-1  | 1.0E0     |
| <input type="checkbox"/> | GOTERM_MF_FAT         | <a href="#">exopeptidase activity</a>                                                             | RT |  | 8     | 4.9E-1  | 1.0E0     |
| <input type="checkbox"/> | GOTERM_MF_FAT         | <a href="#">carboxypeptidase activity</a>                                                         | RT |  | 3     | 8.0E-1  | 1.0E0     |
| <input type="checkbox"/> | GOTERM_MF_FAT         | <a href="#">metallocarboxypeptidase activity</a>                                                  | RT |  | 3     | 8.0E-1  | 1.0E0     |
| <input type="checkbox"/> | INTERPRO              | <a href="#">Peptidase M14, carboxypeptidase A</a>                                                 | RT |  | 3     | 9.0E-1  | 1.0E0     |
| <input type="checkbox"/> | SMART                 | <a href="#">Zn_pept</a>                                                                           | RT |  | 3     | 9.1E-1  | 1.0E0     |
|                          | Annotation Cluster 27 | Enrichment Score: 0.22                                                                            |    |  | Count | P_Value | Benjamini |
| <input type="checkbox"/> | SP_PIR_KEYWORDS       | <a href="#">egf-like domain</a>                                                                   | RT |  | 12    | 4.2E-1  | 9.9E-1    |
| <input type="checkbox"/> | INTERPRO              | <a href="#">EGF, extracellular</a>                                                                | RT |  | 14    | 6.7E-1  | 1.0E0     |
| <input type="checkbox"/> | INTERPRO              | <a href="#">EGF-like, type 3</a>                                                                  | RT |  | 19    | 6.8E-1  | 1.0E0     |
| <input type="checkbox"/> | INTERPRO              | <a href="#">EGF</a>                                                                               | RT |  | 5     | 6.9E-1  | 1.0E0     |
|                          | Annotation Cluster 28 | Enrichment Score: 0.22                                                                            |    |  | Count | P_Value | Benjamini |
| <input type="checkbox"/> | INTERPRO              | <a href="#">Nucleic acid binding, OB-fold, tRNA/helicase-type</a>                                 | RT |  | 4     | 4.5E-1  | 1.0E0     |
| <input type="checkbox"/> | SP_PIR_KEYWORDS       | <a href="#">protein biosynthesis</a>                                                              | RT |  | 7     | 6.1E-1  | 9.9E-1    |
| <input type="checkbox"/> | PIR_SUPERFAMILY       | PIRSF001525: lysine-tRNA ligase                                                                   | RT |  | 3     | 6.2E-1  | 1.0E0     |

| <input type="checkbox"/> | Annotation Cluster    | Enrichment Score                                                                                             | Count | P_Value | Benjamini         |
|--------------------------|-----------------------|--------------------------------------------------------------------------------------------------------------|-------|---------|-------------------|
| <input type="checkbox"/> | INTERPRO              | <a href="#">Aminoacyl-tRNA synthetase, class II (D, K and N)-like</a>                                        | RT    | 3       | 6.3E-1 1.0E0      |
| <input type="checkbox"/> | INTERPRO              | <a href="#">Aminoacyl-tRNA synthetase, class II (D, K and N)</a>                                             | RT    | 3       | 6.3E-1 1.0E0      |
| <input type="checkbox"/> | INTERPRO              | <a href="#">Aminoacyl-tRNA synthetase, class II, conserved region</a>                                        | RT    | 6       | 7.1E-1 1.0E0      |
|                          | Annotation Cluster 29 | Enrichment Score: 0.22                                                                                       |       | Count   | P_Value Benjamini |
| <input type="checkbox"/> | GOTERM_CC_FAT         | <a href="#">nuclear pore</a>                                                                                 | RT    | 4       | 6.1E-1 1.0E0      |
| <input type="checkbox"/> | GOTERM_CC_FAT         | <a href="#">envelope</a>                                                                                     | RT    | 4       | 6.1E-1 1.0E0      |
| <input type="checkbox"/> | GOTERM_CC_FAT         | <a href="#">organelle envelope</a>                                                                           | RT    | 4       | 6.1E-1 1.0E0      |
| <input type="checkbox"/> | GOTERM_CC_FAT         | <a href="#">pore complex</a>                                                                                 | RT    | 4       | 6.1E-1 1.0E0      |
| <input type="checkbox"/> | GOTERM_CC_FAT         | <a href="#">nuclear envelope</a>                                                                             | RT    | 4       | 6.1E-1 1.0E0      |
|                          | Annotation Cluster 30 | Enrichment Score: 0.21                                                                                       |       | Count   | P_Value Benjamini |
| <input type="checkbox"/> | GOTERM_BP_FAT         | <a href="#">carbohydrate biosynthetic process</a>                                                            | RT    | 6       | 3.6E-1 1.0E0      |
| <input type="checkbox"/> | GOTERM_BP_FAT         | <a href="#">cellular carbohydrate biosynthetic process</a>                                                   | RT    | 6       | 3.6E-1 1.0E0      |
| <input type="checkbox"/> | GOTERM_BP_FAT         | <a href="#">alcohol biosynthetic process</a>                                                                 | RT    | 4       | 6.4E-1 1.0E0      |
| <input type="checkbox"/> | GOTERM_BP_FAT         | <a href="#">hexose biosynthetic process</a>                                                                  | RT    | 3       | 7.9E-1 1.0E0      |
| <input type="checkbox"/> | GOTERM_BP_FAT         | <a href="#">pyruvate metabolic process</a>                                                                   | RT    | 3       | 7.9E-1 1.0E0      |
| <input type="checkbox"/> | GOTERM_BP_FAT         | <a href="#">monosaccharide biosynthetic process</a>                                                          | RT    | 3       | 7.9E-1 1.0E0      |
| <input type="checkbox"/> | GOTERM_BP_FAT         | <a href="#">gluconeogenesis</a>                                                                              | RT    | 3       | 7.9E-1 1.0E0      |
|                          | Annotation Cluster 31 | Enrichment Score: 0.21                                                                                       |       | Count   | P_Value Benjamini |
| <input type="checkbox"/> | GOTERM_BP_FAT         | <a href="#">regulation of RNA metabolic process</a>                                                          | RT    | 9       | 3.6E-1 1.0E0      |
| <input type="checkbox"/> | GOTERM_BP_FAT         | <a href="#">regulation of transcription, DNA-dependent</a>                                                   | RT    | 9       | 3.6E-1 1.0E0      |
| <input type="checkbox"/> | GOTERM_BP_FAT         | <a href="#">regulation of transcription</a>                                                                  | RT    | 19      | 5.4E-1 1.0E0      |
| <input type="checkbox"/> | GOTERM_MF_FAT         | <a href="#">NAD or NADH binding</a>                                                                          | RT    | 6       | 5.6E-1 1.0E0      |
| <input type="checkbox"/> | GOTERM_BP_FAT         | <a href="#">negative regulation of RNA metabolic process</a>                                                 | RT    | 4       | 6.4E-1 1.0E0      |
| <input type="checkbox"/> | GOTERM_BP_FAT         | <a href="#">chromatin silencing</a>                                                                          | RT    | 4       | 6.4E-1 1.0E0      |
| <input type="checkbox"/> | GOTERM_BP_FAT         | <a href="#">negative regulation of nitrogen compound metabolic process</a>                                   | RT    | 4       | 6.4E-1 1.0E0      |
| <input type="checkbox"/> | GOTERM_BP_FAT         | <a href="#">regulation of gene expression, epigenetic</a>                                                    | RT    | 4       | 6.4E-1 1.0E0      |
| <input type="checkbox"/> | GOTERM_BP_FAT         | <a href="#">negative regulation of transcription</a>                                                         | RT    | 4       | 6.4E-1 1.0E0      |
| <input type="checkbox"/> | GOTERM_BP_FAT         | <a href="#">negative regulation of nucleobase, nucleoside, nucleotide and nucleic acid metabolic process</a> | RT    | 4       | 6.4E-1 1.0E0      |
| <input type="checkbox"/> | GOTERM_BP_FAT         | <a href="#">negative regulation of gene expression, epigenetic</a>                                           | RT    | 4       | 6.4E-1 1.0E0      |
| <input type="checkbox"/> | GOTERM_BP_FAT         | <a href="#">negative regulation of transcription, DNA-dependent</a>                                          | RT    | 4       | 6.4E-1 1.0E0      |
| <input type="checkbox"/> | GOTERM_BP_FAT         | <a href="#">negative regulation of macromolecule biosynthetic process</a>                                    | RT    | 4       | 6.4E-1 1.0E0      |
| <input type="checkbox"/> | GOTERM_BP_FAT         | <a href="#">negative regulation of biosynthetic process</a>                                                  | RT    | 4       | 6.4E-1 1.0E0      |
| <input type="checkbox"/> | GOTERM_BP_FAT         | <a href="#">negative regulation of cellular biosynthetic process</a>                                         | RT    | 4       | 6.4E-1 1.0E0      |
| <input type="checkbox"/> | GOTERM_MF_FAT         | <a href="#">NAD binding</a>                                                                                  | RT    | 4       | 6.6E-1 1.0E0      |
| <input type="checkbox"/> | GOTERM_BP_FAT         | <a href="#">gene silencing</a>                                                                               | RT    | 5       | 6.6E-1 1.0E0      |
| <input type="checkbox"/> | GOTERM_BP_FAT         | <a href="#">negative regulation of gene expression</a>                                                       | RT    | 5       | 6.6E-1 1.0E0      |
| <input type="checkbox"/> | GOTERM_BP_FAT         | <a href="#">negative regulation of macromolecule metabolic process</a>                                       | RT    | 5       | 6.6E-1 1.0E0      |
| <input type="checkbox"/> | INTERPRO              | <a href="#">NAD-dependent histone deacetylase, silent information regulator Sir2</a>                         | RT    | 4       | 6.6E-1 1.0E0      |
| <input type="checkbox"/> | GOTERM_BP_FAT         | <a href="#">protein amino acid deacetylation</a>                                                             | RT    | 4       | 7.8E-1 1.0E0      |
| <input type="checkbox"/> | GOTERM_MF_FAT         | <a href="#">hydrolase activity, acting on carbon-nitrogen (but not peptide) bonds, in linear amides</a>      | RT    | 5       | 8.0E-1 1.0E0      |
|                          | Annotation Cluster 32 | Enrichment Score: 0.2                                                                                        |       | Count   | P_Value Benjamini |
| <input type="checkbox"/> | GOTERM_BP_FAT         | <a href="#">lipid biosynthetic process</a>                                                                   | RT    | 11      | 2.1E-1 1.0E0      |
| <input type="checkbox"/> | GOTERM_BP_FAT         | <a href="#">phospholipid biosynthetic process</a>                                                            | RT    | 6       | 3.6E-1 1.0E0      |
| <input type="checkbox"/> | GOTERM_BP_FAT         | <a href="#">organophosphate metabolic process</a>                                                            | RT    | 9       | 5.0E-1 1.0E0      |
| <input type="checkbox"/> | GOTERM_BP_FAT         | <a href="#">phospholipid metabolic process</a>                                                               | RT    | 8       | 5.9E-1 1.0E0      |
| <input type="checkbox"/> | INTERPRO              | <a href="#">CDP-alcohol phosphatidyltransferase</a>                                                          | RT    | 3       | 6.3E-1 1.0E0      |
| <input type="checkbox"/> | GOTERM_MF_FAT         | <a href="#">phosphotransferase activity, for other substituted phosphate groups</a>                          | RT    | 3       | 8.0E-1 1.0E0      |
| <input type="checkbox"/> | KEGG_PATHWAY          | <a href="#">Inositol phosphate metabolism</a>                                                                | RT    | 3       | 8.7E-1 1.0E0      |
| <input type="checkbox"/> | GOTERM_BP_FAT         | <a href="#">glycerophospholipid metabolic process</a>                                                        | RT    | 3       | 9.7E-1 1.0E0      |
| <input type="checkbox"/> | GOTERM_BP_FAT         | <a href="#">phosphoinositide metabolic process</a>                                                           | RT    | 3       | 9.7E-1 1.0E0      |
| <input type="checkbox"/> | GOTERM_BP_FAT         | <a href="#">glycerolipid metabolic process</a>                                                               | RT    | 3       | 9.7E-1 1.0E0      |
|                          | Annotation Cluster 33 | Enrichment Score: 0.2                                                                                        |       | Count   | P_Value Benjamini |
| <input type="checkbox"/> | INTERPRO              | <a href="#">SET</a>                                                                                          | RT    | 5       | 5.2E-1 1.0E0      |
| <input type="checkbox"/> | SMART                 | <a href="#">SET</a>                                                                                          | RT    | 5       | 5.4E-1 1.0E0      |



| <input type="checkbox"/> | Annotation Cluster    | Enrichment Score       | Term                                                                              | RT | Bar | Count | P_Value | Benjamini |
|--------------------------|-----------------------|------------------------|-----------------------------------------------------------------------------------|----|-----|-------|---------|-----------|
| <input type="checkbox"/> | INTERPRO              |                        | <a href="#">Post-SET zinc-binding region</a>                                      | RT |     | 3     | 6.3E-1  | 1.0E0     |
| <input type="checkbox"/> | SMART                 |                        | <a href="#">PostSET</a>                                                           | RT |     | 3     | 6.5E-1  | 1.0E0     |
| <input type="checkbox"/> | SP_PIR_KEYWORDS       |                        | <a href="#">methyltransferase</a>                                                 | RT |     | 11    | 9.0E-1  | 1.0E0     |
|                          | Annotation Cluster 34 | Enrichment Score: 0.2  |                                                                                   |    |     | Count | P_Value | Benjamini |
| <input type="checkbox"/> | GOTERM_BP_FAT         |                        | <a href="#">protein amino acid lipidation</a>                                     | RT |     | 4     | 6.4E-1  | 1.0E0     |
| <input type="checkbox"/> | GOTERM_BP_FAT         |                        | <a href="#">lipoprotein biosynthetic process</a>                                  | RT |     | 4     | 6.4E-1  | 1.0E0     |
| <input type="checkbox"/> | GOTERM_BP_FAT         |                        | <a href="#">lipoprotein metabolic process</a>                                     | RT |     | 4     | 6.4E-1  | 1.0E0     |
|                          | Annotation Cluster 35 | Enrichment Score: 0.2  |                                                                                   |    |     | Count | P_Value | Benjamini |
| <input type="checkbox"/> | GOTERM_MF_FAT         |                        | <a href="#">acetyltransferase activity</a>                                        | RT |     | 7     | 5.9E-1  | 1.0E0     |
| <input type="checkbox"/> | GOTERM_MF_FAT         |                        | <a href="#">N-acyltransferase activity</a>                                        | RT |     | 7     | 5.9E-1  | 1.0E0     |
| <input type="checkbox"/> | INTERPRO              |                        | <a href="#">Acyl-CoA N-acyltransferase</a>                                        | RT |     | 7     | 6.0E-1  | 1.0E0     |
| <input type="checkbox"/> | GOTERM_MF_FAT         |                        | <a href="#">N-acetyltransferase activity</a>                                      | RT |     | 6     | 7.0E-1  | 1.0E0     |
| <input type="checkbox"/> | INTERPRO              |                        | <a href="#">GCN5-related N-acetyltransferase</a>                                  | RT |     | 6     | 7.1E-1  | 1.0E0     |
|                          | Annotation Cluster 36 | Enrichment Score: 0.19 |                                                                                   |    |     | Count | P_Value | Benjamini |
| <input type="checkbox"/> | GOTERM_MF_FAT         |                        | <a href="#">FAD binding</a>                                                       | RT |     | 5     | 5.1E-1  | 1.0E0     |
| <input type="checkbox"/> | INTERPRO              |                        | <a href="#">Pyridine nucleotide-disulphide oxidoreductase, NAD-binding region</a> | RT |     | 3     | 6.3E-1  | 1.0E0     |
| <input type="checkbox"/> | INTERPRO              |                        | <a href="#">FAD-dependent pyridine nucleotide-disulphide oxidoreductase</a>       | RT |     | 3     | 8.1E-1  | 1.0E0     |
|                          | Annotation Cluster 37 | Enrichment Score: 0.19 |                                                                                   |    |     | Count | P_Value | Benjamini |
| <input type="checkbox"/> | INTERPRO              |                        | <a href="#">ARF/SAR superfamily</a>                                               | RT |     | 6     | 3.9E-1  | 1.0E0     |
| <input type="checkbox"/> | PIR_SUPERFAMILY       |                        | PIRSF001711:ADP-ribosylation factor                                               | RT |     | 4     | 6.5E-1  | 1.0E0     |
| <input type="checkbox"/> | INTERPRO              |                        | <a href="#">ADP-ribosylation factor</a>                                           | RT |     | 3     | 8.1E-1  | 1.0E0     |
| <input type="checkbox"/> | SMART                 |                        | <a href="#">ARF</a>                                                               | RT |     | 3     | 8.2E-1  | 1.0E0     |
|                          | Annotation Cluster 38 | Enrichment Score: 0.19 |                                                                                   |    |     | Count | P_Value | Benjamini |
| <input type="checkbox"/> | SP_PIR_KEYWORDS       |                        | <a href="#">Transcription</a>                                                     | RT |     | 6     | 5.7E-1  | 9.9E-1    |
| <input type="checkbox"/> | INTERPRO              |                        | <a href="#">RNA polymerase Rpb1, domain 3</a>                                     | RT |     | 3     | 6.3E-1  | 1.0E0     |
| <input type="checkbox"/> | INTERPRO              |                        | <a href="#">RNA polymerase, N-terminal</a>                                        | RT |     | 3     | 6.3E-1  | 1.0E0     |
| <input type="checkbox"/> | INTERPRO              |                        | <a href="#">RNA polymerase Rpb1, domain 1</a>                                     | RT |     | 3     | 6.3E-1  | 1.0E0     |
| <input type="checkbox"/> | INTERPRO              |                        | <a href="#">RNA polymerase Rpb1, domain 5</a>                                     | RT |     | 3     | 6.3E-1  | 1.0E0     |
| <input type="checkbox"/> | INTERPRO              |                        | <a href="#">RNA polymerase Rpb1, domain 4</a>                                     | RT |     | 3     | 6.3E-1  | 1.0E0     |
| <input type="checkbox"/> | INTERPRO              |                        | <a href="#">RNA polymerase, alpha subunit</a>                                     | RT |     | 3     | 6.3E-1  | 1.0E0     |
| <input type="checkbox"/> | SMART                 |                        | <a href="#">RPOLA_N</a>                                                           | RT |     | 3     | 6.5E-1  | 1.0E0     |
| <input type="checkbox"/> | SP_PIR_KEYWORDS       |                        | <a href="#">dna-directed rna polymerase</a>                                       | RT |     | 9     | 6.7E-1  | 9.9E-1    |
| <input type="checkbox"/> | GOTERM_MF_FAT         |                        | <a href="#">ribonucleoside binding</a>                                            | RT |     | 3     | 8.0E-1  | 1.0E0     |
|                          | Annotation Cluster 39 | Enrichment Score: 0.16 |                                                                                   |    |     | Count | P_Value | Benjamini |
| <input type="checkbox"/> | GOTERM_BP_FAT         |                        | <a href="#">response to drug</a>                                                  | RT |     | 4     | 6.4E-1  | 1.0E0     |
| <input type="checkbox"/> | GOTERM_BP_FAT         |                        | <a href="#">multidrug transport</a>                                               | RT |     | 4     | 6.4E-1  | 1.0E0     |
| <input type="checkbox"/> | GOTERM_BP_FAT         |                        | <a href="#">drug transport</a>                                                    | RT |     | 4     | 6.4E-1  | 1.0E0     |
| <input type="checkbox"/> | GOTERM_MF_FAT         |                        | <a href="#">drug transporter activity</a>                                         | RT |     | 4     | 6.6E-1  | 1.0E0     |
| <input type="checkbox"/> | INTERPRO              |                        | <a href="#">Multi antimicrobial extrusion protein MatE</a>                        | RT |     | 4     | 6.6E-1  | 1.0E0     |
| <input type="checkbox"/> | GOTERM_MF_FAT         |                        | <a href="#">antiporter activity</a>                                               | RT |     | 4     | 8.0E-1  | 1.0E0     |
| <input type="checkbox"/> | INTERPRO              |                        | <a href="#">Na+ driven multidrug efflux pump</a>                                  | RT |     | 3     | 8.1E-1  | 1.0E0     |
|                          | Annotation Cluster 40 | Enrichment Score: 0.16 |                                                                                   |    |     | Count | P_Value | Benjamini |
| <input type="checkbox"/> | GOTERM_BP_FAT         |                        | <a href="#">cellular response to stress</a>                                       | RT |     | 13    | 6.0E-1  | 1.0E0     |
| <input type="checkbox"/> | GOTERM_BP_FAT         |                        | <a href="#">DNA repair</a>                                                        | RT |     | 12    | 6.7E-1  | 1.0E0     |
| <input type="checkbox"/> | GOTERM_BP_FAT         |                        | <a href="#">response to DNA damage stimulus</a>                                   | RT |     | 12    | 6.7E-1  | 1.0E0     |
| <input type="checkbox"/> | GOTERM_BP_FAT         |                        | <a href="#">DNA metabolic process</a>                                             | RT |     | 32    | 8.2E-1  | 1.0E0     |
|                          | Annotation Cluster 41 | Enrichment Score: 0.16 |                                                                                   |    |     | Count | P_Value | Benjamini |
| <input type="checkbox"/> | GOTERM_BP_FAT         |                        | <a href="#">rRNA metabolic process</a>                                            | RT |     | 9     | 5.0E-1  | 1.0E0     |
| <input type="checkbox"/> | GOTERM_BP_FAT         |                        | <a href="#">rRNA processing</a>                                                   | RT |     | 9     | 5.0E-1  | 1.0E0     |
| <input type="checkbox"/> | GOTERM_BP_FAT         |                        | <a href="#">ribonucleoprotein complex biogenesis</a>                              | RT |     | 12    | 6.7E-1  | 1.0E0     |
| <input type="checkbox"/> | GOTERM_BP_FAT         |                        | <a href="#">ribosome biogenesis</a>                                               | RT |     | 12    | 6.7E-1  | 1.0E0     |
| <input type="checkbox"/> | GOTERM_BP_FAT         |                        | <a href="#">ncRNA processing</a>                                                  | RT |     | 16    | 7.9E-1  | 1.0E0     |
| <input type="checkbox"/> | GOTERM_BP_FAT         |                        | <a href="#">tRNA processing</a>                                                   | RT |     | 8     | 9.5E-1  | 1.0E0     |
| <input type="checkbox"/> | GOTERM_BP_FAT         |                        | <a href="#">RNA processing</a>                                                    | RT |     | 22    | 9.6E-1  | 1.0E0     |
|                          | Annotation Cluster 42 | Enrichment Score: 0.16 |                                                                                   |    |     | Count | P_Value | Benjamini |
| <input type="checkbox"/> | INTERPRO              |                        | <a href="#">Nucleotide-binding, alpha-beta plait</a>                              | RT |     | 11    | 4.9E-1  | 1.0E0     |
| <input type="checkbox"/> | INTERPRO              |                        | <a href="#">RNA recognition motif, RNP-1</a>                                      | RT |     | 8     | 8.3E-1  | 1.0E0     |
| <input type="checkbox"/> | SMART                 |                        | <a href="#">RRM</a>                                                               | RT |     | 8     | 8.5E-1  | 1.0E0     |
|                          | Annotation Cluster 43 | Enrichment Score: 0.14 |                                                                                   |    |     | Count | P_Value | Benjamini |

| <input type="checkbox"/> | Annotation            | Term                                                                       | RT |                                                                                     | Count | P_Value | Benjamini               |
|--------------------------|-----------------------|----------------------------------------------------------------------------|----|-------------------------------------------------------------------------------------|-------|---------|-------------------------|
| <input type="checkbox"/> | GOTERM_MF_FAT         | <a href="#">protein kinase regulator activity</a>                          | RT |                                                                                     | 5     | 6.8E-1  | 1.0E0                   |
| <input type="checkbox"/> | GOTERM_MF_FAT         | <a href="#">kinase regulator activity</a>                                  | RT |                                                                                     | 5     | 6.8E-1  | 1.0E0                   |
| <input type="checkbox"/> | GOTERM_MF_FAT         | <a href="#">cAMP-dependent protein kinase regulator activity</a>           | RT |                                                                                     | 3     | 8.0E-1  | 1.0E0                   |
|                          | Annotation Cluster 44 | Enrichment Score: 0.14                                                     |    |    |       |         | Count P_Value Benjamini |
| <input type="checkbox"/> | GOTERM_BP_FAT         | <a href="#">translation</a>                                                | RT |                                                                                     | 67    | 4.0E-1  | 1.0E0                   |
| <input type="checkbox"/> | GOTERM_MF_FAT         | <a href="#">structural molecule activity</a>                               | RT |                                                                                     | 50    | 5.0E-1  | 1.0E0                   |
| <input type="checkbox"/> | KEGG_PATHWAY          | <a href="#">Ribosome</a>                                                   | RT |                                                                                     | 38    | 6.2E-1  | 9.9E-1                  |
| <input type="checkbox"/> | GOTERM_CC_FAT         | <a href="#">ribonucleoprotein complex</a>                                  | RT |                                                                                     | 54    | 7.4E-1  | 1.0E0                   |
| <input type="checkbox"/> | GOTERM_MF_FAT         | <a href="#">structural constituent of ribosome</a>                         | RT |                                                                                     | 39    | 7.6E-1  | 1.0E0                   |
| <input type="checkbox"/> | GOTERM_CC_FAT         | <a href="#">ribosome</a>                                                   | RT |                                                                                     | 40    | 8.1E-1  | 1.0E0                   |
| <input type="checkbox"/> | SP_PIR_KEYWORDS       | <a href="#">ribosomal protein</a>                                          | RT |                                                                                     | 37    | 9.6E-1  | 1.0E0                   |
| <input type="checkbox"/> | GOTERM_CC_FAT         | <a href="#">intracellular non-membrane-bounded organelle</a>               | RT |                                                                                     | 80    | 9.8E-1  | 1.0E0                   |
| <input type="checkbox"/> | GOTERM_CC_FAT         | <a href="#">non-membrane-bounded organelle</a>                             | RT |                                                                                     | 80    | 9.8E-1  | 1.0E0                   |
|                          | Annotation Cluster 45 | Enrichment Score: 0.14                                                     |    |    |       |         | Count P_Value Benjamini |
| <input type="checkbox"/> | GOTERM_MF_FAT         | <a href="#">tubulin-tyrosine ligase activity</a>                           | RT |                                                                                     | 5     | 6.8E-1  | 1.0E0                   |
| <input type="checkbox"/> | INTERPRO              | <a href="#">Tubulin-tyrosine ligase</a>                                    | RT |                                                                                     | 5     | 6.9E-1  | 1.0E0                   |
| <input type="checkbox"/> | GOTERM_MF_FAT         | <a href="#">acid-amino acid ligase activity</a>                            | RT |                                                                                     | 15    | 8.2E-1  | 1.0E0                   |
|                          | Annotation Cluster 46 | Enrichment Score: 0.14                                                     |    |    |       |         | Count P_Value Benjamini |
| <input type="checkbox"/> | GOTERM_MF_FAT         | <a href="#">lipid binding</a>                                              | RT |                                                                                     | 23    | 4.4E-1  | 1.0E0                   |
| <input type="checkbox"/> | GOTERM_MF_FAT         | <a href="#">phospholipid binding</a>                                       | RT |                                                                                     | 17    | 5.5E-1  | 1.0E0                   |
| <input type="checkbox"/> | GOTERM_MF_FAT         | <a href="#">calcium-dependent phospholipid binding</a>                     | RT |                                                                                     | 14    | 5.7E-1  | 1.0E0                   |
| <input type="checkbox"/> | INTERPRO              | <a href="#">Annexin repeat</a>                                             | RT |                                                                                     | 9     | 6.6E-1  | 1.0E0                   |
| <input type="checkbox"/> | SMART                 | <a href="#">ANX</a>                                                        | RT |                                                                                     | 9     | 6.9E-1  | 1.0E0                   |
| <input type="checkbox"/> | INTERPRO              | <a href="#">Annexin</a>                                                    | RT |                                                                                     | 9     | 8.3E-1  | 1.0E0                   |
| <input type="checkbox"/> | SP_PIR_KEYWORDS       | <a href="#">annexin</a>                                                    | RT |                                                                                     | 9     | 8.4E-1  | 9.9E-1                  |
| <input type="checkbox"/> | GOTERM_MF_FAT         | <a href="#">calcium ion binding</a>                                        | RT |                                                                                     | 20    | 9.8E-1  | 1.0E0                   |
| <input type="checkbox"/> | INTERPRO              | <a href="#">Alpha giardin</a>                                              | RT |                                                                                     | 5     | 9.8E-1  | 1.0E0                   |
| <input type="checkbox"/> | GOTERM_BP_FAT         | <a href="#">cytoskeleton organization</a>                                  | RT |                                                                                     | 6     | 9.9E-1  | 1.0E0                   |
|                          | Annotation Cluster 47 | Enrichment Score: 0.13                                                     |    |  |       |         | Count P_Value Benjamini |
| <input type="checkbox"/> | INTERPRO              | <a href="#">SANT, DNA-binding</a>                                          | RT |                                                                                     | 7     | 6.0E-1  | 1.0E0                   |
| <input type="checkbox"/> | SMART                 | <a href="#">SANT</a>                                                       | RT |                                                                                     | 7     | 6.3E-1  | 1.0E0                   |
| <input type="checkbox"/> | INTERPRO              | <a href="#">Myb-type HTH DNA-binding domain</a>                            | RT |                                                                                     | 3     | 8.1E-1  | 1.0E0                   |
| <input type="checkbox"/> | INTERPRO              | <a href="#">Myb transcription factor</a>                                   | RT |                                                                                     | 3     | 8.1E-1  | 1.0E0                   |
| <input type="checkbox"/> | INTERPRO              | <a href="#">Myb, DNA-binding</a>                                           | RT |                                                                                     | 3     | 9.0E-1  | 1.0E0                   |
|                          | Annotation Cluster 48 | Enrichment Score: 0.13                                                     |    |  |       |         | Count P_Value Benjamini |
| <input type="checkbox"/> | GOTERM_BP_FAT         | <a href="#">glucose metabolic process</a>                                  | RT |                                                                                     | 13    | 5.0E-1  | 1.0E0                   |
| <input type="checkbox"/> | GOTERM_BP_FAT         | <a href="#">hexose metabolic process</a>                                   | RT |                                                                                     | 13    | 5.0E-1  | 1.0E0                   |
| <input type="checkbox"/> | GOTERM_BP_FAT         | <a href="#">monosaccharide metabolic process</a>                           | RT |                                                                                     | 13    | 7.7E-1  | 1.0E0                   |
| <input type="checkbox"/> | GOTERM_BP_FAT         | <a href="#">hexose catabolic process</a>                                   | RT |                                                                                     | 8     | 8.0E-1  | 1.0E0                   |
| <input type="checkbox"/> | GOTERM_BP_FAT         | <a href="#">glucose catabolic process</a>                                  | RT |                                                                                     | 8     | 8.0E-1  | 1.0E0                   |
| <input type="checkbox"/> | GOTERM_BP_FAT         | <a href="#">monosaccharide catabolic process</a>                           | RT |                                                                                     | 8     | 8.0E-1  | 1.0E0                   |
| <input type="checkbox"/> | GOTERM_BP_FAT         | <a href="#">alcohol catabolic process</a>                                  | RT |                                                                                     | 8     | 8.0E-1  | 1.0E0                   |
| <input type="checkbox"/> | GOTERM_BP_FAT         | <a href="#">carbohydrate catabolic process</a>                             | RT |                                                                                     | 8     | 8.0E-1  | 1.0E0                   |
| <input type="checkbox"/> | GOTERM_BP_FAT         | <a href="#">cellular carbohydrate catabolic process</a>                    | RT |                                                                                     | 8     | 8.0E-1  | 1.0E0                   |
| <input type="checkbox"/> | SP_PIR_KEYWORDS       | <a href="#">glycolysis</a>                                                 | RT |                                                                                     | 4     | 8.1E-1  | 1.0E0                   |
| <input type="checkbox"/> | GOTERM_BP_FAT         | <a href="#">glycolysis</a>                                                 | RT |                                                                                     | 5     | 9.6E-1  | 1.0E0                   |
|                          | Annotation Cluster 49 | Enrichment Score: 0.13                                                     |    |  |       |         | Count P_Value Benjamini |
| <input type="checkbox"/> | GOTERM_BP_FAT         | <a href="#">modification-dependent macromolecule catabolic process</a>     | RT |                                                                                     | 16    | 5.7E-1  | 1.0E0                   |
| <input type="checkbox"/> | GOTERM_BP_FAT         | <a href="#">modification-dependent protein catabolic process</a>           | RT |                                                                                     | 16    | 5.7E-1  | 1.0E0                   |
| <input type="checkbox"/> | GOTERM_BP_FAT         | <a href="#">macromolecule catabolic process</a>                            | RT |                                                                                     | 23    | 6.2E-1  | 1.0E0                   |
| <input type="checkbox"/> | GOTERM_BP_FAT         | <a href="#">cellular macromolecule catabolic process</a>                   | RT |                                                                                     | 20    | 6.4E-1  | 1.0E0                   |
| <input type="checkbox"/> | KEGG_PATHWAY          | <a href="#">Proteasome</a>                                                 | RT |                                                                                     | 16    | 6.5E-1  | 9.9E-1                  |
| <input type="checkbox"/> | GOTERM_BP_FAT         | <a href="#">protein catabolic process</a>                                  | RT |                                                                                     | 22    | 6.7E-1  | 1.0E0                   |
| <input type="checkbox"/> | INTERPRO              | <a href="#">Proteasome, alpha-subunit, conserved site</a>                  | RT |                                                                                     | 5     | 6.9E-1  | 1.0E0                   |
| <input type="checkbox"/> | GOTERM_BP_FAT         | <a href="#">cellular protein catabolic process</a>                         | RT |                                                                                     | 19    | 7.0E-1  | 1.0E0                   |
| <input type="checkbox"/> | GOTERM_BP_FAT         | <a href="#">proteolysis involved in cellular protein catabolic process</a> | RT |                                                                                     | 19    | 7.0E-1  | 1.0E0                   |
| <input type="checkbox"/> | INTERPRO              | <a href="#">Proteasome, alpha and beta subunits</a>                        | RT |                                                                                     | 8     | 7.4E-1  | 1.0E0                   |

| <input type="checkbox"/> | Annotation      | Term                                                                          | Count                  | P-Value | Benjamini               |
|--------------------------|-----------------|-------------------------------------------------------------------------------|------------------------|---------|-------------------------|
| <input type="checkbox"/> | SP_PIR_KEYWORDS | <a href="#">ubi conjugation pathway</a>                                       | 8                      | 7.5E-1  | 9.9E-1                  |
| <input type="checkbox"/> | GOTERM_CC_FAT   | <a href="#">proteasome core complex</a>                                       | 8                      | 7.7E-1  | 1.0E0                   |
| <input type="checkbox"/> | PIR_SUPERFAMILY | PIRSF001212: multicatalytic endopeptidase complex chain C9                    | 4                      | 7.9E-1  | 1.0E0                   |
| <input type="checkbox"/> | GOTERM_BP_FAT   | <a href="#">ubiquitin-dependent protein catabolic process</a>                 | 8                      | 8.0E-1  | 1.0E0                   |
| <input type="checkbox"/> | GOTERM_MF_FAT   | <a href="#">threonine-type endopeptidase activity</a>                         | 8                      | 8.2E-1  | 1.0E0                   |
| <input type="checkbox"/> | GOTERM_MF_FAT   | <a href="#">threonine-type peptidase activity</a>                             | 8                      | 8.2E-1  | 1.0E0                   |
| <input type="checkbox"/> | INTERPRO        | <a href="#">Proteasome, subunit alpha/beta</a>                                | 8                      | 8.3E-1  | 1.0E0                   |
| <input type="checkbox"/> | GOTERM_CC_FAT   | <a href="#">proteasome complex</a>                                            | 10                     | 9.3E-1  | 1.0E0                   |
| <input type="checkbox"/> | SP_PIR_KEYWORDS | <a href="#">proteasome</a>                                                    | 10                     | 9.4E-1  | 1.0E0                   |
| <input type="checkbox"/> | SP_PIR_KEYWORDS | <a href="#">threonine protease</a>                                            | 3                      | 9.6E-1  | 1.0E0                   |
| <input type="checkbox"/> | GOTERM_CC_FAT   | <a href="#">cytosol</a>                                                       | 13                     | 9.7E-1  | 1.0E0                   |
| Annotation Cluster 50    |                 |                                                                               | Enrichment Score: 0.12 |         | Count P_Value Benjamini |
| <input type="checkbox"/> | GOTERM_BP_FAT   | <a href="#">secondary metabolic process</a>                                   | 4                      | 6.4E-1  | 1.0E0                   |
| <input type="checkbox"/> | GOTERM_BP_FAT   | <a href="#">alkaloid metabolic process</a>                                    | 4                      | 6.4E-1  | 1.0E0                   |
| <input type="checkbox"/> | GOTERM_BP_FAT   | <a href="#">cellular amide metabolic process</a>                              | 4                      | 6.4E-1  | 1.0E0                   |
| <input type="checkbox"/> | GOTERM_BP_FAT   | <a href="#">nicotinamide metabolic process</a>                                | 4                      | 6.4E-1  | 1.0E0                   |
| <input type="checkbox"/> | GOTERM_BP_FAT   | <a href="#">nicotinamide nucleotide metabolic process</a>                     | 4                      | 6.4E-1  | 1.0E0                   |
| <input type="checkbox"/> | GOTERM_BP_FAT   | <a href="#">pyridine nucleotide metabolic process</a>                         | 4                      | 7.8E-1  | 1.0E0                   |
| <input type="checkbox"/> | GOTERM_BP_FAT   | <a href="#">oxidoreduction coenzyme metabolic process</a>                     | 4                      | 7.8E-1  | 1.0E0                   |
| <input type="checkbox"/> | GOTERM_BP_FAT   | <a href="#">coenzyme metabolic process</a>                                    | 6                      | 7.9E-1  | 1.0E0                   |
| <input type="checkbox"/> | GOTERM_BP_FAT   | <a href="#">cofactor metabolic process</a>                                    | 6                      | 9.2E-1  | 1.0E0                   |
| <input type="checkbox"/> | GOTERM_BP_FAT   | <a href="#">coenzyme biosynthetic process</a>                                 | 3                      | 9.7E-1  | 1.0E0                   |
| <input type="checkbox"/> | GOTERM_BP_FAT   | <a href="#">cofactor biosynthetic process</a>                                 | 3                      | 9.9E-1  | 1.0E0                   |
| Annotation Cluster 51    |                 |                                                                               | Enrichment Score: 0.12 |         | Count P_Value Benjamini |
| <input type="checkbox"/> | SP_PIR_KEYWORDS | <a href="#">serine/threonine-protein kinase</a>                               | 38                     | 4.6E-1  | 9.8E-1                  |
| <input type="checkbox"/> | GOTERM_MF_FAT   | <a href="#">protein serine/threonine kinase activity</a>                      | 60                     | 6.8E-1  | 1.0E0                   |
| <input type="checkbox"/> | INTERPRO        | <a href="#">Protein kinase, ATP binding site</a>                              | 47                     | 7.3E-1  | 1.0E0                   |
| <input type="checkbox"/> | INTERPRO        | <a href="#">Serine/threonine protein kinase, active site</a>                  | 51                     | 7.3E-1  | 1.0E0                   |
| <input type="checkbox"/> | INTERPRO        | <a href="#">Serine/threonine protein kinase-related</a>                       | 127                    | 9.3E-1  | 1.0E0                   |
| <input type="checkbox"/> | INTERPRO        | <a href="#">Serine/threonine protein kinase</a>                               | 29                     | 9.6E-1  | 1.0E0                   |
| <input type="checkbox"/> | SMART           | <a href="#">S_TKc</a>                                                         | 29                     | 9.7E-1  | 1.0E0                   |
| Annotation Cluster 52    |                 |                                                                               | Enrichment Score: 0.12 |         | Count P_Value Benjamini |
| <input type="checkbox"/> | SP_PIR_KEYWORDS | <a href="#">protein biosynthesis</a>                                          | 7                      | 6.1E-1  | 9.9E-1                  |
| <input type="checkbox"/> | INTERPRO        | <a href="#">Aminoacyl-tRNA synthetase, class II, conserved region</a>         | 6                      | 7.1E-1  | 1.0E0                   |
| <input type="checkbox"/> | GOTERM_MF_FAT   | <a href="#">ligase activity, forming carbon-oxygen bonds</a>                  | 14                     | 7.4E-1  | 1.0E0                   |
| <input type="checkbox"/> | GOTERM_MF_FAT   | <a href="#">aminoacyl-tRNA ligase activity</a>                                | 14                     | 7.4E-1  | 1.0E0                   |
| <input type="checkbox"/> | GOTERM_MF_FAT   | <a href="#">ligase activity, forming aminoacyl-tRNA and related compounds</a> | 14                     | 7.4E-1  | 1.0E0                   |
| <input type="checkbox"/> | GOTERM_BP_FAT   | <a href="#">ncRNA metabolic process</a>                                       | 29                     | 7.5E-1  | 1.0E0                   |
| <input type="checkbox"/> | GOTERM_BP_FAT   | <a href="#">amino acid activation</a>                                         | 13                     | 7.7E-1  | 1.0E0                   |
| <input type="checkbox"/> | GOTERM_BP_FAT   | <a href="#">tRNA aminoacylation</a>                                           | 13                     | 7.7E-1  | 1.0E0                   |
| <input type="checkbox"/> | SP_PIR_KEYWORDS | <a href="#">Aminoacyl-tRNA synthetase</a>                                     | 13                     | 8.2E-1  | 9.9E-1                  |
| <input type="checkbox"/> | GOTERM_BP_FAT   | <a href="#">tRNA aminoacylation for protein translation</a>                   | 12                     | 8.2E-1  | 1.0E0                   |
| <input type="checkbox"/> | KEGG_PATHWAY    | <a href="#">Aminoacyl-tRNA biosynthesis</a>                                   | 11                     | 8.3E-1  | 1.0E0                   |
| <input type="checkbox"/> | GOTERM_BP_FAT   | <a href="#">tRNA metabolic process</a>                                        | 21                     | 8.7E-1  | 1.0E0                   |
| Annotation Cluster 53    |                 |                                                                               | Enrichment Score: 0.12 |         | Count P_Value Benjamini |
| <input type="checkbox"/> | PIR_SUPERFAMILY | PIRSF002585: heat shock protein DnaJ                                          | 3                      | 6.2E-1  | 1.0E0                   |
| <input type="checkbox"/> | INTERPRO        | <a href="#">Heat shock protein DnaJ</a>                                       | 3                      | 6.3E-1  | 1.0E0                   |
| <input type="checkbox"/> | INTERPRO        | <a href="#">Chaperone DnaJ, C-terminal</a>                                    | 3                      | 6.3E-1  | 1.0E0                   |
| <input type="checkbox"/> | INTERPRO        | <a href="#">Molecular chaperone, heat shock protein, Hsp40, DnaJ</a>          | 5                      | 6.9E-1  | 1.0E0                   |
| <input type="checkbox"/> | GOTERM_MF_FAT   | <a href="#">heat shock protein binding</a>                                    | 5                      | 8.0E-1  | 1.0E0                   |
| <input type="checkbox"/> | INTERPRO        | <a href="#">Heat shock protein DnaJ, N-terminal</a>                           | 5                      | 8.1E-1  | 1.0E0                   |
| <input type="checkbox"/> | SMART           | <a href="#">DnaJ</a>                                                          | 5                      | 8.2E-1  | 1.0E0                   |
| <input type="checkbox"/> | SP_PIR_KEYWORDS | <a href="#">Chaperone</a>                                                     | 5                      | 9.8E-1  | 1.0E0                   |
| <input type="checkbox"/> | GOTERM_MF_FAT   | <a href="#">unfolded protein binding</a>                                      | 9                      | 9.8E-1  | 1.0E0                   |
| Annotation Cluster 54    |                 |                                                                               | Enrichment Score: 0.12 |         | Count P_Value Benjamini |
| <input type="checkbox"/> | INTERPRO        | <a href="#">Kelch-type beta propeller</a>                                     | 5                      | 6.9E-1  | 1.0E0                   |
| <input type="checkbox"/> | INTERPRO        | <a href="#">Kelch repeat type 1</a>                                           | 4                      | 8.0E-1  | 1.0E0                   |

| Annotation Cluster                       | Term                                                                 | Enrichment Score | RT | Count | P_Value | Benjamini |
|------------------------------------------|----------------------------------------------------------------------|------------------|----|-------|---------|-----------|
| SMART<br>Annotation Cluster 55           | <a href="#">Kelch</a>                                                | 0.11             | RT | 4     | 8.2E-1  | 1.0E0     |
| INTERPRO                                 | <a href="#">Tyrosine protein kinase</a>                              |                  | RT | 5     | 6.9E-1  | 1.0E0     |
| SMART                                    | <a href="#">TyrKc</a>                                                |                  | RT | 5     | 7.1E-1  | 1.0E0     |
| GOTERM_MF_FAT<br>Annotation Cluster 56   | <a href="#">protein tyrosine kinase activity</a>                     | 0.11             | RT | 12    | 9.7E-1  | 1.0E0     |
| GOTERM_CC_FAT                            | <a href="#">cell projection</a>                                      |                  | RT | 3     | 7.7E-1  | 1.0E0     |
| GOTERM_CC_FAT                            | <a href="#">flagellum</a>                                            |                  | RT | 3     | 7.7E-1  | 1.0E0     |
| SP_PIR_KEYWORDS<br>Annotation Cluster 57 | <a href="#">flagellum</a>                                            | 0.1              | RT | 3     | 8.1E-1  | 9.9E-1    |
| INTERPRO                                 | <a href="#">Dynein heavy chain, N-terminal region 2</a>              |                  | RT | 8     | 5.0E-1  | 1.0E0     |
| COG_ONTOLOGY                             | <a href="#">Cytoskeleton</a>                                         |                  | RT | 13    | 7.5E-1  | 1.0E0     |
| GOTERM_CC_FAT                            | <a href="#">dynein complex</a>                                       |                  | RT | 7     | 7.6E-1  | 1.0E0     |
| INTERPRO                                 | <a href="#">Dynein heavy chain</a>                                   |                  | RT | 7     | 8.2E-1  | 1.0E0     |
| GOTERM_CC_FAT                            | <a href="#">microtubule associated complex</a>                       |                  | RT | 8     | 8.4E-1  | 1.0E0     |
| GOTERM_MF_FAT                            | <a href="#">motor activity</a>                                       |                  | RT | 20    | 9.7E-1  | 1.0E0     |
| GOTERM_MF_FAT<br>Annotation Cluster 58   | <a href="#">microtubule motor activity</a>                           | 0.1              | RT | 20    | 9.7E-1  | 1.0E0     |
| GOTERM_BP_FAT                            | <a href="#">membrane docking</a>                                     |                  | RT | 3     | 7.9E-1  | 1.0E0     |
| GOTERM_BP_FAT                            | <a href="#">exocytosis</a>                                           |                  | RT | 3     | 7.9E-1  | 1.0E0     |
| GOTERM_BP_FAT                            | <a href="#">secretion</a>                                            |                  | RT | 3     | 7.9E-1  | 1.0E0     |
| GOTERM_BP_FAT                            | <a href="#">vesicle docking during exocytosis</a>                    |                  | RT | 3     | 7.9E-1  | 1.0E0     |
| GOTERM_BP_FAT                            | <a href="#">vesicle docking</a>                                      |                  | RT | 3     | 7.9E-1  | 1.0E0     |
| GOTERM_BP_FAT                            | <a href="#">secretion by cell</a>                                    |                  | RT | 3     | 7.9E-1  | 1.0E0     |
| INTERPRO<br>Annotation Cluster 59        | <a href="#">Sec1-like protein</a>                                    | 0.1              | RT | 3     | 8.1E-1  | 1.0E0     |
| INTERPRO                                 | <a href="#">Zinc finger, C2H2-type</a>                               |                  | RT | 11    | 7.0E-1  | 1.0E0     |
| INTERPRO                                 | <a href="#">Zinc finger, C2H2-like</a>                               |                  | RT | 10    | 8.4E-1  | 1.0E0     |
| SMART<br>Annotation Cluster 60           | <a href="#">ZnF_C2H2</a>                                             | 0.1              | RT | 10    | 8.6E-1  | 1.0E0     |
| INTERPRO                                 | <a href="#">Beta tubulin</a>                                         |                  | RT | 3     | 6.3E-1  | 1.0E0     |
| GOTERM_BP_FAT                            | <a href="#">protein complex assembly</a>                             |                  | RT | 8     | 7.1E-1  | 1.0E0     |
| GOTERM_BP_FAT                            | <a href="#">protein complex biogenesis</a>                           |                  | RT | 8     | 7.1E-1  | 1.0E0     |
| GOTERM_BP_FAT                            | <a href="#">protein polymerization</a>                               |                  | RT | 5     | 7.8E-1  | 1.0E0     |
| GOTERM_BP_FAT                            | <a href="#">macromolecular complex subunit organization</a>          |                  | RT | 15    | 7.8E-1  | 1.0E0     |
| INTERPRO                                 | <a href="#">Beta tubulin, autoregulation binding site</a>            |                  | RT | 4     | 8.0E-1  | 1.0E0     |
| INTERPRO                                 | <a href="#">Tubulin, conserved site</a>                              |                  | RT | 5     | 8.1E-1  | 1.0E0     |
| INTERPRO                                 | <a href="#">Tubulin/FtsZ, GTPase domain</a>                          |                  | RT | 5     | 8.1E-1  | 1.0E0     |
| INTERPRO                                 | <a href="#">Tubulin</a>                                              |                  | RT | 5     | 8.1E-1  | 1.0E0     |
| GOTERM_BP_FAT                            | <a href="#">macromolecular complex assembly</a>                      |                  | RT | 14    | 8.3E-1  | 1.0E0     |
| GOTERM_BP_FAT                            | <a href="#">cellular protein complex assembly</a>                    |                  | RT | 6     | 8.7E-1  | 1.0E0     |
| GOTERM_BP_FAT                            | <a href="#">cellular macromolecular complex subunit organization</a> |                  | RT | 13    | 8.8E-1  | 1.0E0     |
| PIR_SUPERFAMILY                          | PIRSF002306:tubulin                                                  |                  | RT | 4     | 8.8E-1  | 1.0E0     |
| INTERPRO                                 | <a href="#">Tubulin/FtsZ, 2-layer sandwich domain</a>                |                  | RT | 4     | 8.9E-1  | 1.0E0     |
| GOTERM_BP_FAT<br>Annotation Cluster 61   | <a href="#">cellular macromolecular complex assembly</a>             | 0.09             | RT | 12    | 9.1E-1  | 1.0E0     |
| INTERPRO                                 | <a href="#">Copine</a>                                               |                  | RT | 4     | 6.6E-1  | 1.0E0     |
| INTERPRO                                 | <a href="#">von Willebrand factor, type A</a>                        |                  | RT | 4     | 8.9E-1  | 1.0E0     |
| SMART<br>Annotation Cluster 62           | <a href="#">VWA</a>                                                  | 0.09             | RT | 4     | 9.0E-1  | 1.0E0     |
| SP_PIR_KEYWORDS                          | <a href="#">nucleotide-binding</a>                                   |                  | RT | 162   | 4.3E-1  | 9.8E-1    |
| GOTERM_BP_FAT                            | <a href="#">protein amino acid phosphorylation</a>                   |                  | RT | 152   | 6.5E-1  | 1.0E0     |
| SP_PIR_KEYWORDS                          | <a href="#">atp-binding</a>                                          |                  | RT | 150   | 6.6E-1  | 9.9E-1    |
| GOTERM_BP_FAT                            | <a href="#">phosphorylation</a>                                      |                  | RT | 162   | 6.9E-1  | 1.0E0     |
| GOTERM_BP_FAT                            | <a href="#">phosphorus metabolic process</a>                         |                  | RT | 170   | 7.4E-1  | 1.0E0     |
| GOTERM_BP_FAT                            | <a href="#">phosphate metabolic process</a>                          |                  | RT | 170   | 7.4E-1  | 1.0E0     |
| GOTERM_MF_FAT                            | <a href="#">protein kinase activity</a>                              |                  | RT | 154   | 7.4E-1  | 1.0E0     |
| INTERPRO                                 | <a href="#">Protein kinase, core</a>                                 |                  | RT | 151   | 7.9E-1  | 1.0E0     |

|                          |                  |                                                                  |    |  |                        |        |        |       |         |           |
|--------------------------|------------------|------------------------------------------------------------------|----|--|------------------------|--------|--------|-------|---------|-----------|
| <input type="checkbox"/> | GOTERM_MF_FAT    | <a href="#">nucleotide binding</a>                               | RT |  | 352                    | 8.1E-1 | 1.0EO  |       |         |           |
| <input type="checkbox"/> | GOTERM_MF_FAT    | <a href="#">purine nucleotide binding</a>                        | RT |  | 328                    | 8.8E-1 | 1.0EO  |       |         |           |
| <input type="checkbox"/> | GOTERM_MF_FAT    | <a href="#">purine ribonucleotide binding</a>                    | RT |  | 322                    | 9.2E-1 | 1.0EO  |       |         |           |
| <input type="checkbox"/> | GOTERM_MF_FAT    | <a href="#">ribonucleotide binding</a>                           | RT |  | 322                    | 9.2E-1 | 1.0EO  |       |         |           |
| <input type="checkbox"/> | SP_PIR_KEYWORDS  | <a href="#">kinase</a>                                           | RT |  | 184                    | 9.3E-1 | 1.0EO  |       |         |           |
| <input type="checkbox"/> | INTERPRO         | <a href="#">Serine/threonine protein kinase-related</a>          | RT |  | 127                    | 9.3E-1 | 1.0EO  |       |         |           |
| <input type="checkbox"/> | GOTERM_MF_FAT    | <a href="#">nucleoside binding</a>                               | RT |  | 295                    | 9.8E-1 | 1.0EO  |       |         |           |
| <input type="checkbox"/> | GOTERM_MF_FAT    | <a href="#">adenyl nucleotide binding</a>                        | RT |  | 292                    | 9.8E-1 | 1.0EO  |       |         |           |
| <input type="checkbox"/> | GOTERM_MF_FAT    | <a href="#">purine nucleoside binding</a>                        | RT |  | 292                    | 9.8E-1 | 1.0EO  |       |         |           |
| <input type="checkbox"/> | GOTERM_MF_FAT    | <a href="#">adenyl ribonucleotide binding</a>                    | RT |  | 286                    | 9.9E-1 | 1.0EO  |       |         |           |
| <input type="checkbox"/> | GOTERM_MF_FAT    | <a href="#">ATP binding</a>                                      | RT |  | 286                    | 9.9E-1 | 1.0EO  |       |         |           |
| Annotation Cluster 63    |                  |                                                                  |    |  | Enrichment Score: 0.09 |        |        | Count | P_Value | Benjamini |
| <input type="checkbox"/> | GOTERM_MF_FAT    | <a href="#">DNA-directed DNA polymerase activity</a>             | RT |  | 7                      | 5.9E-1 | 1.0EO  |       |         |           |
| <input type="checkbox"/> | SP_PIR_KEYWORDS  | <a href="#">dna replication</a>                                  | RT |  | 6                      | 8.2E-1 | 9.9E-1 |       |         |           |
| <input type="checkbox"/> | INTERPRO         | <a href="#">DNA-directed DNA polymerase, family B</a>            | RT |  | 3                      | 9.0E-1 | 1.0EO  |       |         |           |
| <input type="checkbox"/> | SP_PIR_KEYWORDS  | <a href="#">dna-directed dna polymerase</a>                      | RT |  | 3                      | 9.1E-1 | 1.0EO  |       |         |           |
| <input type="checkbox"/> | SMART            | <a href="#">POLBc</a>                                            | RT |  | 3                      | 9.1E-1 | 1.0EO  |       |         |           |
| Annotation Cluster 64    |                  |                                                                  |    |  | Enrichment Score: 0.08 |        |        | Count | P_Value | Benjamini |
| <input type="checkbox"/> | GOTERM_MF_FAT    | <a href="#">ATPase activity</a>                                  | RT |  | 55                     | 6.2E-1 | 1.0EO  |       |         |           |
| <input type="checkbox"/> | GOTERM_MF_FAT    | <a href="#">ATPase activity, coupled</a>                         | RT |  | 41                     | 6.4E-1 | 1.0EO  |       |         |           |
| <input type="checkbox"/> | INTERPRO         | <a href="#">DNA/RNA helicase, DEAD/DEAH box type, N-terminal</a> | RT |  | 18                     | 6.6E-1 | 1.0EO  |       |         |           |
| <input type="checkbox"/> | GOTERM_MF_FAT    | <a href="#">purine NTP-dependent helicase activity</a>           | RT |  | 21                     | 8.2E-1 | 1.0EO  |       |         |           |
| <input type="checkbox"/> | GOTERM_MF_FAT    | <a href="#">ATP-dependent helicase activity</a>                  | RT |  | 21                     | 8.2E-1 | 1.0EO  |       |         |           |
| <input type="checkbox"/> | INTERPRO         | <a href="#">DEAD-like helicase, N-terminal</a>                   | RT |  | 23                     | 8.8E-1 | 1.0EO  |       |         |           |
| <input type="checkbox"/> | INTERPRO         | <a href="#">Helicase, superfamily 1 and 2, ATP-binding</a>       | RT |  | 23                     | 8.8E-1 | 1.0EO  |       |         |           |
| <input type="checkbox"/> | INTERPRO         | <a href="#">RNA helicase, DEAD-box type, Q motif</a>             | RT |  | 9                      | 8.9E-1 | 1.0EO  |       |         |           |
| <input type="checkbox"/> | SMART            | <a href="#">DEXDc</a>                                            | RT |  | 23                     | 9.1E-1 | 1.0EO  |       |         |           |
| <input type="checkbox"/> | INTERPRO         | <a href="#">DNA/RNA helicase, C-terminal</a>                     | RT |  | 23                     | 9.1E-1 | 1.0EO  |       |         |           |
| <input type="checkbox"/> | SP_PIR_KEYWORDS  | <a href="#">helicase</a>                                         | RT |  | 23                     | 9.2E-1 | 1.0EO  |       |         |           |
| <input type="checkbox"/> | GOTERM_MF_FAT    | <a href="#">helicase activity</a>                                | RT |  | 28                     | 9.2E-1 | 1.0EO  |       |         |           |
| <input type="checkbox"/> | SMART            | <a href="#">HELICc</a>                                           | RT |  | 23                     | 9.3E-1 | 1.0EO  |       |         |           |
| Annotation Cluster 65    |                  |                                                                  |    |  | Enrichment Score: 0.08 |        |        | Count | P_Value | Benjamini |
| <input type="checkbox"/> | GOTERM_MF_FAT    | <a href="#">cis-trans isomerase activity</a>                     | RT |  | 5                      | 8.0E-1 | 1.0EO  |       |         |           |
| <input type="checkbox"/> | GOTERM_MF_FAT    | <a href="#">peptidyl-prolyl cis-trans isomerase activity</a>     | RT |  | 5                      | 8.0E-1 | 1.0EO  |       |         |           |
| <input type="checkbox"/> | INTERPRO         | <a href="#">Peptidyl-prolyl cis-trans isomerase, FKBP-type</a>   | RT |  | 4                      | 8.0E-1 | 1.0EO  |       |         |           |
| <input type="checkbox"/> | SP_PIR_KEYWORDS  | <a href="#">Rotamase</a>                                         | RT |  | 5                      | 8.1E-1 | 9.9E-1 |       |         |           |
| <input type="checkbox"/> | GOTERM_BP_FAT    | <a href="#">protein folding</a>                                  | RT |  | 15                     | 9.2E-1 | 1.0EO  |       |         |           |
| Annotation Cluster 66    |                  |                                                                  |    |  | Enrichment Score: 0.08 |        |        | Count | P_Value | Benjamini |
| <input type="checkbox"/> | GOTERM_MF_FAT    | <a href="#">adenyltransferase activity</a>                       | RT |  | 4                      | 6.6E-1 | 1.0EO  |       |         |           |
| <input type="checkbox"/> | GOTERM_BP_FAT    | <a href="#">water-soluble vitamin biosynthetic process</a>       | RT |  | 3                      | 8.9E-1 | 1.0EO  |       |         |           |
| <input type="checkbox"/> | GOTERM_BP_FAT    | <a href="#">vitamin metabolic process</a>                        | RT |  | 3                      | 8.9E-1 | 1.0EO  |       |         |           |
| <input type="checkbox"/> | GOTERM_BP_FAT    | <a href="#">water-soluble vitamin metabolic process</a>          | RT |  | 3                      | 8.9E-1 | 1.0EO  |       |         |           |
| <input type="checkbox"/> | GOTERM_BP_FAT    | <a href="#">vitamin biosynthetic process</a>                     | RT |  | 3                      | 8.9E-1 | 1.0EO  |       |         |           |
| Annotation Cluster 67    |                  |                                                                  |    |  | Enrichment Score: 0.08 |        |        | Count | P_Value | Benjamini |
| <input type="checkbox"/> | SP_PIR_KEYWORDS  | <a href="#">ligase</a>                                           | RT |  | 33                     | 6.2E-1 | 9.9E-1 |       |         |           |
| <input type="checkbox"/> | SP_PIR_KEYWORDS  | <a href="#">ubi conjugation pathway</a>                          | RT |  | 8                      | 7.5E-1 | 9.9E-1 |       |         |           |
| <input type="checkbox"/> | PIRS_SUPERFAMILY | PIRSF001567:ubiquitin-protein ligase E2                          | RT |  | 4                      | 7.9E-1 | 1.0EO  |       |         |           |
| <input type="checkbox"/> | GOTERM_MF_FAT    | <a href="#">acid-amino acid ligase activity</a>                  | RT |  | 15                     | 8.2E-1 | 1.0EO  |       |         |           |
| <input type="checkbox"/> | GOTERM_MF_FAT    | <a href="#">ligase activity, forming carbon-nitrogen bonds</a>   | RT |  | 17                     | 8.8E-1 | 1.0EO  |       |         |           |
| <input type="checkbox"/> | INTERPRO         | <a href="#">Ubiquitin-conjugating enzyme/RWD-like</a>            | RT |  | 6                      | 9.3E-1 | 1.0EO  |       |         |           |
| <input type="checkbox"/> | INTERPRO         | <a href="#">Ubiquitin-conjugating enzyme, E2</a>                 | RT |  | 6                      | 9.3E-1 | 1.0EO  |       |         |           |
| <input type="checkbox"/> | SMART            | <a href="#">UBCc</a>                                             | RT |  | 6                      | 9.4E-1 | 1.0EO  |       |         |           |
| <input type="checkbox"/> | GOTERM_MF_FAT    | <a href="#">small conjugating protein ligase activity</a>        | RT |  | 6                      | 9.6E-1 | 1.0EO  |       |         |           |
| Annotation Cluster 68    |                  |                                                                  |    |  | Enrichment Score: 0.07 |        |        | Count | P_Value | Benjamini |
| <input type="checkbox"/> | GOTERM_MF_FAT    | <a href="#">DNA polymerase activity</a>                          | RT |  | 20                     | 6.9E-1 | 1.0EO  |       |         |           |
| <input type="checkbox"/> | GOTERM_MF_FAT    | <a href="#">RNA-directed DNA polymerase activity</a>             | RT |  | 13                     | 8.5E-1 | 1.0EO  |       |         |           |
| <input type="checkbox"/> | GOTERM_MF_FAT    | <a href="#">nuclease activity</a>                                | RT |  | 27                     | 8.6E-1 | 1.0EO  |       |         |           |
| <input type="checkbox"/> | GOTERM_MF_FAT    | <a href="#">rna-directed dna polymerase</a>                      | RT |  | 12                     | 9.1E-1 | 1.0EO  |       |         |           |

| <input type="checkbox"/> | Annotation            | Enrichment Score                                                                                    | Count | P-Value | Benjamini |
|--------------------------|-----------------------|-----------------------------------------------------------------------------------------------------|-------|---------|-----------|
| <input type="checkbox"/> | SP_PIR_KEYWORDS       |                                                                                                     |       |         |           |
| <input type="checkbox"/> | GOTERM_MF_FAT         | <a href="#">endonuclease activity</a>                                                               | 17    | 9.4E-1  | 1.0E0     |
| <input type="checkbox"/> | SP_PIR_KEYWORDS       | <a href="#">Endonuclease</a>                                                                        | 15    | 9.4E-1  | 1.0E0     |
|                          | Annotation Cluster 69 | Enrichment Score: 0.06                                                                              | Count | P-Value | Benjamini |
| <input type="checkbox"/> | GOTERM_MF_FAT         | <a href="#">nucleobase, nucleoside, nucleotide kinase activity</a>                                  | 6     | 8.1E-1  | 1.0E0     |
| <input type="checkbox"/> | GOTERM_MF_FAT         | <a href="#">phosphotransferase activity, phosphate group as acceptor</a>                            | 4     | 8.9E-1  | 1.0E0     |
| <input type="checkbox"/> | GOTERM_MF_FAT         | <a href="#">nucleotide kinase activity</a>                                                          | 3     | 9.0E-1  | 1.0E0     |
|                          | Annotation Cluster 70 | Enrichment Score: 0.06                                                                              | Count | P-Value | Benjamini |
| <input type="checkbox"/> | GOTERM_MF_FAT         | <a href="#">iron ion binding</a>                                                                    | 19    | 5.9E-1  | 1.0E0     |
| <input type="checkbox"/> | SP_PIR_KEYWORDS       | <a href="#">iron</a>                                                                                | 11    | 8.6E-1  | 9.9E-1    |
| <input type="checkbox"/> | INTERPRO              | <a href="#">Serine/threonine-specific protein phosphatase and bis(5-nucleosyl)-tetraphosphatase</a> | 8     | 8.9E-1  | 1.0E0     |
| <input type="checkbox"/> | SMART                 | <a href="#">PP2Ac</a>                                                                               | 8     | 9.0E-1  | 1.0E0     |
| <input type="checkbox"/> | GOTERM_MF_FAT         | <a href="#">phosphoprotein phosphatase activity</a>                                                 | 14    | 9.3E-1  | 1.0E0     |
| <input type="checkbox"/> | PIR_SUPERFAMILY       | PIRSF000908: serine/threonine-protein phosphatase, conventional type                                | 4     | 9.4E-1  | 1.0E0     |
| <input type="checkbox"/> | GOTERM_MF_FAT         | <a href="#">phosphatase activity</a>                                                                | 22    | 9.5E-1  | 1.0E0     |
| <input type="checkbox"/> | INTERPRO              | <a href="#">Metallophosphoesterase</a>                                                              | 9     | 9.8E-1  | 1.0E0     |
|                          | Annotation Cluster 71 | Enrichment Score: 0.06                                                                              | Count | P-Value | Benjamini |
| <input type="checkbox"/> | GOTERM_CC_FAT         | <a href="#">nuclear lumen</a>                                                                       | 3     | 8.8E-1  | 1.0E0     |
| <input type="checkbox"/> | GOTERM_CC_FAT         | <a href="#">membrane-enclosed lumen</a>                                                             | 3     | 8.8E-1  | 1.0E0     |
| <input type="checkbox"/> | GOTERM_CC_FAT         | <a href="#">intracellular organelle lumen</a>                                                       | 3     | 8.8E-1  | 1.0E0     |
| <input type="checkbox"/> | GOTERM_CC_FAT         | <a href="#">organelle lumen</a>                                                                     | 3     | 8.8E-1  | 1.0E0     |
|                          | Annotation Cluster 72 | Enrichment Score: 0.05                                                                              | Count | P-Value | Benjamini |
| <input type="checkbox"/> | GOTERM_MF_FAT         | <a href="#">heme binding</a>                                                                        | 4     | 8.9E-1  | 1.0E0     |
| <input type="checkbox"/> | GOTERM_MF_FAT         | <a href="#">tetrapyrrole binding</a>                                                                | 4     | 8.9E-1  | 1.0E0     |
| <input type="checkbox"/> | INTERPRO              | <a href="#">Cytochrome b5</a>                                                                       | 3     | 9.0E-1  | 1.0E0     |
| <input type="checkbox"/> | SP_PIR_KEYWORDS       | <a href="#">heme</a>                                                                                | 3     | 9.1E-1  | 1.0E0     |
|                          | Annotation Cluster 73 | Enrichment Score: 0.04                                                                              | Count | P-Value | Benjamini |
| <input type="checkbox"/> | GOTERM_MF_FAT         | <a href="#">phosphoinositide binding</a>                                                            | 3     | 9.0E-1  | 1.0E0     |
| <input type="checkbox"/> | INTERPRO              | <a href="#">Phox-like</a>                                                                           | 3     | 9.0E-1  | 1.0E0     |
| <input type="checkbox"/> | SMART                 | <a href="#">PX</a>                                                                                  | 3     | 9.1E-1  | 1.0E0     |
|                          | Annotation Cluster 74 | Enrichment Score: 0.04                                                                              | Count | P-Value | Benjamini |
| <input type="checkbox"/> | INTERPRO              | <a href="#">Kinesin_motor region, conserved site</a>                                                | 11    | 7.0E-1  | 1.0E0     |
| <input type="checkbox"/> | GOTERM_CC_FAT         | <a href="#">microtubule</a>                                                                         | 17    | 8.6E-1  | 1.0E0     |
| <input type="checkbox"/> | GOTERM_CC_FAT         | <a href="#">cytoskeleton</a>                                                                        | 28    | 8.6E-1  | 1.0E0     |
| <input type="checkbox"/> | SP_PIR_KEYWORDS       | <a href="#">microtubule</a>                                                                         | 17    | 8.9E-1  | 1.0E0     |
| <input type="checkbox"/> | GOTERM_BP_FAT         | <a href="#">microtubule-based movement</a>                                                          | 24    | 9.1E-1  | 1.0E0     |
| <input type="checkbox"/> | GOTERM_CC_FAT         | <a href="#">cytoskeletal part</a>                                                                   | 26    | 9.1E-1  | 1.0E0     |
| <input type="checkbox"/> | GOTERM_CC_FAT         | <a href="#">microtubule cytoskeleton</a>                                                            | 26    | 9.1E-1  | 1.0E0     |
| <input type="checkbox"/> | SP_PIR_KEYWORDS       | <a href="#">motor protein</a>                                                                       | 12    | 9.4E-1  | 1.0E0     |
| <input type="checkbox"/> | GOTERM_BP_FAT         | <a href="#">microtubule-based process</a>                                                           | 26    | 9.7E-1  | 1.0E0     |
| <input type="checkbox"/> | GOTERM_MF_FAT         | <a href="#">motor activity</a>                                                                      | 20    | 9.7E-1  | 1.0E0     |
| <input type="checkbox"/> | GOTERM_MF_FAT         | <a href="#">microtubule motor activity</a>                                                          | 20    | 9.7E-1  | 1.0E0     |
| <input type="checkbox"/> | INTERPRO              | <a href="#">Kinesin_motor region</a>                                                                | 12    | 9.9E-1  | 1.0E0     |
| <input type="checkbox"/> | SMART                 | <a href="#">K1Sc</a>                                                                                | 12    | 9.9E-1  | 1.0E0     |
|                          | Annotation Cluster 75 | Enrichment Score: 0.03                                                                              | Count | P-Value | Benjamini |
| <input type="checkbox"/> | INTERPRO              | <a href="#">Tetratricopeptide-like helical</a>                                                      | 17    | 8.4E-1  | 1.0E0     |
| <input type="checkbox"/> | INTERPRO              | <a href="#">Tetratricopeptide region</a>                                                            | 13    | 8.6E-1  | 1.0E0     |
| <input type="checkbox"/> | INTERPRO              | <a href="#">Tetratricopeptide TPR-1</a>                                                             | 10    | 9.3E-1  | 1.0E0     |
| <input type="checkbox"/> | INTERPRO              | <a href="#">Tetratricopeptide repeat</a>                                                            | 11    | 9.7E-1  | 1.0E0     |
| <input type="checkbox"/> | SP_PIR_KEYWORDS       | <a href="#">tpc repeat</a>                                                                          | 4     | 9.7E-1  | 1.0E0     |
| <input type="checkbox"/> | SMART                 | <a href="#">TPR</a>                                                                                 | 11    | 9.8E-1  | 1.0E0     |
|                          | Annotation Cluster 76 | Enrichment Score: 0.03                                                                              | Count | P-Value | Benjamini |
| <input type="checkbox"/> | INTERPRO              | <a href="#">WD40 repeat, subgroup</a>                                                               | 30    | 8.9E-1  | 1.0E0     |
| <input type="checkbox"/> | INTERPRO              | <a href="#">WD40 repeat, conserved site</a>                                                         | 15    | 9.1E-1  | 1.0E0     |
| <input type="checkbox"/> | INTERPRO              | <a href="#">WD40/YVTN repeat-like</a>                                                               | 38    | 9.2E-1  | 1.0E0     |
| <input type="checkbox"/> | INTERPRO              | <a href="#">WD40 repeat</a>                                                                         | 39    | 9.2E-1  | 1.0E0     |
| <input type="checkbox"/> | INTERPRO              | <a href="#">WD40 repeat 2</a>                                                                       | 22    | 9.3E-1  | 1.0E0     |

| <input type="checkbox"/> | SP_PIR_KEYWORDS       | <a href="#">wd_repeat</a>                                                   | RT |  |  |  |  | 25    | 9.5E-1  | 1.0E0     |
|--------------------------|-----------------------|-----------------------------------------------------------------------------|----|--|--|--|--|-------|---------|-----------|
| <input type="checkbox"/> | SMART                 | <a href="#">WD40</a>                                                        | RT |  |  |  |  | 39    | 9.5E-1  | 1.0E0     |
| <input type="checkbox"/> | INTERPRO              | <a href="#">WD40 repeat_region</a>                                          | RT |  |  |  |  | 23    | 9.7E-1  | 1.0E0     |
|                          | Annotation Cluster 77 | Enrichment Score: 0.03                                                      |    |  |  |  |  | Count | P_Value | Benjamini |
| <input type="checkbox"/> | GOTERM_MF_FAT         | <a href="#">protein tyrosine phosphatase activity</a>                       | RT |  |  |  |  | 4     | 8.9E-1  | 1.0E0     |
| <input type="checkbox"/> | GOTERM_MF_FAT         | <a href="#">phosphoprotein phosphatase activity</a>                         | RT |  |  |  |  | 14    | 9.3E-1  | 1.0E0     |
| <input type="checkbox"/> | GOTERM_BP_FAT         | <a href="#">protein amino acid dephosphorylation</a>                        | RT |  |  |  |  | 6     | 9.5E-1  | 1.0E0     |
| <input type="checkbox"/> | GOTERM_BP_FAT         | <a href="#">dephosphorylation</a>                                           | RT |  |  |  |  | 7     | 9.7E-1  | 1.0E0     |
|                          | Annotation Cluster 78 | Enrichment Score: 0.03                                                      |    |  |  |  |  | Count | P_Value | Benjamini |
| <input type="checkbox"/> | GOTERM_BP_FAT         | <a href="#">macromolecular complex subunit organization</a>                 | RT |  |  |  |  | 15    | 7.8E-1  | 1.0E0     |
| <input type="checkbox"/> | GOTERM_BP_FAT         | <a href="#">macromolecular complex assembly</a>                             | RT |  |  |  |  | 14    | 8.3E-1  | 1.0E0     |
| <input type="checkbox"/> | GOTERM_BP_FAT         | <a href="#">cellular macromolecular complex subunit organization</a>        | RT |  |  |  |  | 13    | 8.8E-1  | 1.0E0     |
| <input type="checkbox"/> | SP_PIR_KEYWORDS       | <a href="#">nucleosome core</a>                                             | RT |  |  |  |  | 4     | 9.0E-1  | 1.0E0     |
| <input type="checkbox"/> | GOTERM_BP_FAT         | <a href="#">cellular macromolecular complex assembly</a>                    | RT |  |  |  |  | 12    | 9.1E-1  | 1.0E0     |
| <input type="checkbox"/> | INTERPRO              | <a href="#">Histone-fold</a>                                                | RT |  |  |  |  | 7     | 9.3E-1  | 1.0E0     |
| <input type="checkbox"/> | GOTERM_CC_FAT         | <a href="#">nucleosome</a>                                                  | RT |  |  |  |  | 5     | 9.5E-1  | 1.0E0     |
| <input type="checkbox"/> | GOTERM_BP_FAT         | <a href="#">DNA packaging</a>                                               | RT |  |  |  |  | 5     | 9.6E-1  | 1.0E0     |
| <input type="checkbox"/> | GOTERM_BP_FAT         | <a href="#">nucleosome assembly</a>                                         | RT |  |  |  |  | 5     | 9.6E-1  | 1.0E0     |
| <input type="checkbox"/> | GOTERM_BP_FAT         | <a href="#">nucleosome organization</a>                                     | RT |  |  |  |  | 5     | 9.6E-1  | 1.0E0     |
| <input type="checkbox"/> | GOTERM_BP_FAT         | <a href="#">protein-DNA complex assembly</a>                                | RT |  |  |  |  | 5     | 9.6E-1  | 1.0E0     |
| <input type="checkbox"/> | GOTERM_BP_FAT         | <a href="#">chromatin assembly</a>                                          | RT |  |  |  |  | 5     | 9.6E-1  | 1.0E0     |
| <input type="checkbox"/> | INTERPRO              | <a href="#">Histone core</a>                                                | RT |  |  |  |  | 5     | 9.6E-1  | 1.0E0     |
| <input type="checkbox"/> | SP_PIR_KEYWORDS       | <a href="#">chromosomal protein</a>                                         | RT |  |  |  |  | 5     | 9.7E-1  | 1.0E0     |
| <input type="checkbox"/> | GOTERM_CC_FAT         | <a href="#">chromatin</a>                                                   | RT |  |  |  |  | 5     | 9.7E-1  | 1.0E0     |
| <input type="checkbox"/> | GOTERM_CC_FAT         | <a href="#">chromosomal part</a>                                            | RT |  |  |  |  | 7     | 9.8E-1  | 1.0E0     |
| <input type="checkbox"/> | GOTERM_BP_FAT         | <a href="#">chromosome organization</a>                                     | RT |  |  |  |  | 8     | 9.8E-1  | 1.0E0     |
| <input type="checkbox"/> | GOTERM_CC_FAT         | <a href="#">protein-DNA complex</a>                                         | RT |  |  |  |  | 5     | 9.8E-1  | 1.0E0     |
| <input type="checkbox"/> | GOTERM_BP_FAT         | <a href="#">chromatin organization</a>                                      | RT |  |  |  |  | 6     | 9.8E-1  | 1.0E0     |
| <input type="checkbox"/> | GOTERM_BP_FAT         | <a href="#">chromatin assembly or disassembly</a>                           | RT |  |  |  |  | 5     | 9.9E-1  | 1.0E0     |
| <input type="checkbox"/> | GOTERM_CC_FAT         | <a href="#">chromosome</a>                                                  | RT |  |  |  |  | 11    | 9.9E-1  | 1.0E0     |
|                          | Annotation Cluster 79 | Enrichment Score: 0.02                                                      |    |  |  |  |  | Count | P_Value | Benjamini |
| <input type="checkbox"/> | INTERPRO              | <a href="#">Protein phosphatase 2C-related</a>                              | RT |  |  |  |  | 3     | 9.5E-1  | 1.0E0     |
| <input type="checkbox"/> | INTERPRO              | <a href="#">Protein phosphatase 2C</a>                                      | RT |  |  |  |  | 3     | 9.5E-1  | 1.0E0     |
| <input type="checkbox"/> | INTERPRO              | <a href="#">Protein phosphatase 2C, N-terminal</a>                          | RT |  |  |  |  | 3     | 9.5E-1  | 1.0E0     |
| <input type="checkbox"/> | SMART                 | <a href="#">PP2Cc</a>                                                       | RT |  |  |  |  | 3     | 9.6E-1  | 1.0E0     |
| <input type="checkbox"/> | SMART                 | <a href="#">PP2C_SIG</a>                                                    | RT |  |  |  |  | 3     | 9.6E-1  | 1.0E0     |
|                          | Annotation Cluster 80 | Enrichment Score: 0.01                                                      |    |  |  |  |  | Count | P_Value | Benjamini |
| <input type="checkbox"/> | GOTERM_CC_FAT         | <a href="#">prefoldin complex</a>                                           | RT |  |  |  |  | 3     | 9.4E-1  | 1.0E0     |
| <input type="checkbox"/> | GOTERM_MF_FAT         | <a href="#">unfolded protein binding</a>                                    | RT |  |  |  |  | 9     | 9.8E-1  | 1.0E0     |
| <input type="checkbox"/> | GOTERM_CC_FAT         | <a href="#">cytosolic part</a>                                              | RT |  |  |  |  | 3     | 9.9E-1  | 1.0E0     |
|                          | Annotation Cluster 81 | Enrichment Score: 0.01                                                      |    |  |  |  |  | Count | P_Value | Benjamini |
| <input type="checkbox"/> | INTERPRO              | <a href="#">Like-Sm ribonucleoprotein, eukaryotic and archaea-type_core</a> | RT |  |  |  |  | 3     | 9.8E-1  | 1.0E0     |
| <input type="checkbox"/> | SMART                 | <a href="#">Sm</a>                                                          | RT |  |  |  |  | 3     | 9.8E-1  | 1.0E0     |
| <input type="checkbox"/> | INTERPRO              | <a href="#">Like-Sm ribonucleoprotein_core</a>                              | RT |  |  |  |  | 4     | 9.9E-1  | 1.0E0     |
|                          | Annotation Cluster 82 | Enrichment Score: 0.01                                                      |    |  |  |  |  | Count | P_Value | Benjamini |
| <input type="checkbox"/> | GOTERM_MF_FAT         | <a href="#">nucleoside-triphosphatase regulator activity</a>                | RT |  |  |  |  | 6     | 9.6E-1  | 1.0E0     |
| <input type="checkbox"/> | GOTERM_MF_FAT         | <a href="#">GTPase regulator activity</a>                                   | RT |  |  |  |  | 4     | 9.9E-1  | 1.0E0     |
| <input type="checkbox"/> | GOTERM_MF_FAT         | <a href="#">small GTPase regulator activity</a>                             | RT |  |  |  |  | 4     | 9.9E-1  | 1.0E0     |
| <input type="checkbox"/> | GOTERM_BP_FAT         | <a href="#">regulation of small GTPase mediated signal transduction</a>     | RT |  |  |  |  | 3     | 9.9E-1  | 1.0E0     |
| <input type="checkbox"/> | GOTERM_BP_FAT         | <a href="#">regulation of Ras protein signal transduction</a>               | RT |  |  |  |  | 3     | 9.9E-1  | 1.0E0     |
|                          | Annotation Cluster 83 | Enrichment Score: 0                                                         |    |  |  |  |  | Count | P_Value | Benjamini |
| <input type="checkbox"/> | SP_PIR_KEYWORDS       | <a href="#">calcium</a>                                                     | RT |  |  |  |  | 5     | 1.0E0   | 1.0E0     |
| <input type="checkbox"/> | INTERPRO              | <a href="#">EF-HAND_1</a>                                                   | RT |  |  |  |  | 7     | 1.0E0   | 1.0E0     |
| <input type="checkbox"/> | INTERPRO              | <a href="#">EF-HAND_2</a>                                                   | RT |  |  |  |  | 5     | 1.0E0   | 1.0E0     |
| <input type="checkbox"/> | INTERPRO              | <a href="#">EF-Hand type</a>                                                | RT |  |  |  |  | 4     | 1.0E0   | 1.0E0     |

225 terms were not clustered.

---

Please cite [Nature Protocols 2009; 4\(1\):44](#) & [Genome Biology 2003; 4\(5\):P3](#) within any publication that makes use of any methods inspired by DAVID.

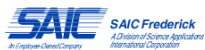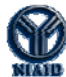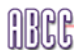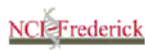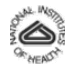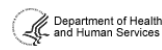

[Term of Service](#) | [Contact Us](#) | [Site Map](#)





## Functional Annotation Clustering

[Help and Manual](#)

Current Gene List: 3\_Random7

Current Background: Giardia intestinalis

3000 DAVID IDs

Options Classification Stringency Medium

Rerun using options

Create Sublist

79 Cluster(s)

[Download File](#)

|                          | Annotation Cluster 1 | Enrichment Score: 0.98                                           |    |  | Count | P_Value | Benjamini |
|--------------------------|----------------------|------------------------------------------------------------------|----|--|-------|---------|-----------|
| <input type="checkbox"/> | GOTERM_MF_FAT        | <a href="#">phospholipid binding</a>                             | RT |  | 22    | 3.4E-2  | 9.7E-1    |
| <input type="checkbox"/> | GOTERM_MF_FAT        | <a href="#">lipid binding</a>                                    | RT |  | 28    | 3.5E-2  | 9.4E-1    |
| <input type="checkbox"/> | GOTERM_MF_FAT        | <a href="#">calcium-dependent phospholipid binding</a>           | RT |  | 18    | 6.1E-2  | 9.9E-1    |
| <input type="checkbox"/> | INTERPRO             | <a href="#">Annexin repeat</a>                                   | RT |  | 12    | 9.8E-2  | 1.0E0     |
| <input type="checkbox"/> | GOTERM_MF_FAT        | <a href="#">calcium ion binding</a>                              | RT |  | 31    | 1.0E-1  | 9.9E-1    |
| <input type="checkbox"/> | SMART                | <a href="#">ANX</a>                                              | RT |  | 12    | 1.0E-1  | 1.0E0     |
| <input type="checkbox"/> | INTERPRO             | <a href="#">Annexin</a>                                          | RT |  | 13    | 1.3E-1  | 1.0E0     |
| <input type="checkbox"/> | SP_PIR_KEYWORDS      | <a href="#">annexin</a>                                          | RT |  | 13    | 1.3E-1  | 1.0E0     |
| <input type="checkbox"/> | GOTERM_BP_FAT        | <a href="#">cytoskeleton organization</a>                        | RT |  | 12    | 3.0E-1  | 1.0E0     |
| <input type="checkbox"/> | INTERPRO             | <a href="#">Alpha giardin</a>                                    | RT |  | 9     | 3.9E-1  | 1.0E0     |
|                          | Annotation Cluster 2 | Enrichment Score: 0.92                                           |    |  | Count | P_Value | Benjamini |
| <input type="checkbox"/> | GOTERM_BP_FAT        | <a href="#">ncRNA processing</a>                                 | RT |  | 23    | 4.4E-2  | 1.0E0     |
| <input type="checkbox"/> | GOTERM_BP_FAT        | <a href="#">ncRNA metabolic process</a>                          | RT |  | 37    | 8.0E-2  | 1.0E0     |
| <input type="checkbox"/> | GOTERM_BP_FAT        | <a href="#">RNA processing</a>                                   | RT |  | 33    | 8.9E-2  | 1.0E0     |
| <input type="checkbox"/> | GOTERM_BP_FAT        | <a href="#">ribonucleoprotein complex biogenesis</a>             | RT |  | 16    | 1.1E-1  | 1.0E0     |
| <input type="checkbox"/> | GOTERM_BP_FAT        | <a href="#">ribosome biogenesis</a>                              | RT |  | 16    | 1.1E-1  | 1.0E0     |
| <input type="checkbox"/> | GOTERM_BP_FAT        | <a href="#">rRNA metabolic process</a>                           | RT |  | 11    | 1.5E-1  | 1.0E0     |
| <input type="checkbox"/> | GOTERM_BP_FAT        | <a href="#">rRNA processing</a>                                  | RT |  | 11    | 1.5E-1  | 1.0E0     |
| <input type="checkbox"/> | GOTERM_BP_FAT        | <a href="#">tRNA processing</a>                                  | RT |  | 13    | 2.4E-1  | 1.0E0     |
| <input type="checkbox"/> | GOTERM_BP_FAT        | <a href="#">tRNA metabolic process</a>                           | RT |  | 27    | 2.7E-1  | 1.0E0     |
|                          | Annotation Cluster 3 | Enrichment Score: 0.9                                            |    |  | Count | P_Value | Benjamini |
| <input type="checkbox"/> | GOTERM_MF_FAT        | <a href="#">metal ion binding</a>                                | RT |  | 167   | 1.6E-2  | 1.0E0     |
| <input type="checkbox"/> | GOTERM_MF_FAT        | <a href="#">cation binding</a>                                   | RT |  | 168   | 2.2E-2  | 9.9E-1    |
| <input type="checkbox"/> | GOTERM_MF_FAT        | <a href="#">ion binding</a>                                      | RT |  | 168   | 2.2E-2  | 9.9E-1    |
| <input type="checkbox"/> | GOTERM_MF_FAT        | <a href="#">zinc ion binding</a>                                 | RT |  | 99    | 7.8E-2  | 9.9E-1    |
| <input type="checkbox"/> | GOTERM_MF_FAT        | <a href="#">transition metal ion binding</a>                     | RT |  | 121   | 8.0E-2  | 9.9E-1    |
| <input type="checkbox"/> | INTERPRO             | <a href="#">Zinc finger, RING-type</a>                           | RT |  | 43    | 2.6E-1  | 1.0E0     |
| <input type="checkbox"/> | SMART                | <a href="#">RING</a>                                             | RT |  | 43    | 2.9E-1  | 1.0E0     |
| <input type="checkbox"/> | SP_PIR_KEYWORDS      | <a href="#">zinc</a>                                             | RT |  | 53    | 2.9E-1  | 1.0E0     |
| <input type="checkbox"/> | SP_PIR_KEYWORDS      | <a href="#">metal-binding</a>                                    | RT |  | 61    | 4.1E-1  | 1.0E0     |
| <input type="checkbox"/> | SP_PIR_KEYWORDS      | <a href="#">zinc-finger</a>                                      | RT |  | 38    | 4.1E-1  | 1.0E0     |
| <input type="checkbox"/> | INTERPRO             | <a href="#">Zinc finger, C3HC4 RING-type</a>                     | RT |  | 21    | 6.2E-1  | 1.0E0     |
|                          | Annotation Cluster 4 | Enrichment Score: 0.78                                           |    |  | Count | P_Value | Benjamini |
| <input type="checkbox"/> | GOTERM_MF_FAT        | <a href="#">helicase activity</a>                                | RT |  | 40    | 3.1E-2  | 9.9E-1    |
| <input type="checkbox"/> | INTERPRO             | <a href="#">DNA/RNA helicase, C-terminal</a>                     | RT |  | 32    | 6.3E-2  | 1.0E0     |
| <input type="checkbox"/> | SP_PIR_KEYWORDS      | <a href="#">helicase</a>                                         | RT |  | 32    | 6.6E-2  | 1.0E0     |
| <input type="checkbox"/> | SMART                | <a href="#">HELICc</a>                                           | RT |  | 32    | 6.9E-2  | 1.0E0     |
| <input type="checkbox"/> | INTERPRO             | <a href="#">Helicase, superfamily 1 and 2, ATP-binding</a>       | RT |  | 31    | 7.9E-2  | 1.0E0     |
| <input type="checkbox"/> | INTERPRO             | <a href="#">DNA/RNA helicase, DEAD/DEAH box type, N-terminal</a> | RT |  | 22    | 1.3E-1  | 1.0E0     |
| <input type="checkbox"/> | INTERPRO             | <a href="#">DEAD-like helicase, N-terminal</a>                   | RT |  | 30    | 1.4E-1  | 1.0E0     |
| <input type="checkbox"/> | SMART                | <a href="#">DEXDc</a>                                            | RT |  | 30    | 1.5E-1  | 1.0E0     |
| <input type="checkbox"/> | GOTERM_MF_FAT        | <a href="#">ATP-dependent helicase activity</a>                  | RT |  | 26    | 2.5E-1  | 1.0E0     |
| <input type="checkbox"/> | GOTERM_MF_FAT        | <a href="#">purine NTP-dependent helicase activity</a>           | RT |  | 26    | 2.5E-1  | 1.0E0     |
| <input type="checkbox"/> | INTERPRO             | <a href="#">RNA helicase, DEAD-box type, Q motif</a>             | RT |  | 10    | 7.5E-1  | 1.0E0     |
| <input type="checkbox"/> | GOTERM_MF_FAT        | <a href="#">ATPase activity, coupled</a>                         | RT |  | 39    | 8.4E-1  | 1.0E0     |

| <input type="checkbox"/> |                        |                                                                                         |           |  |  |  |  |  |  |       |         |           |
|--------------------------|------------------------|-----------------------------------------------------------------------------------------|-----------|--|--|--|--|--|--|-------|---------|-----------|
| <input type="checkbox"/> | <b>GOTERM_MF_FAT</b>   | <a href="#">ATPase activity</a>                                                         | <b>RT</b> |  |  |  |  |  |  | 50    | 9.4E-1  | 1.0E0     |
|                          | Annotation Cluster 5   | Enrichment Score: 0.58                                                                  |           |  |  |  |  |  |  | Count | P_Value | Benjamini |
| <input type="checkbox"/> | <b>INTERPRO</b>        | <a href="#">Serine/threonine protein kinase</a>                                         | <b>RT</b> |  |  |  |  |  |  | 40    | 9.9E-2  | 1.0E0     |
| <input type="checkbox"/> | <b>SMART</b>           | <a href="#">S_TKc</a>                                                                   | <b>RT</b> |  |  |  |  |  |  | 40    | 1.1E-1  | 9.9E-1    |
| <input type="checkbox"/> | <b>GOTERM_MF_FAT</b>   | <a href="#">protein serine/threonine kinase activity</a>                                | <b>RT</b> |  |  |  |  |  |  | 68    | 1.5E-1  | 1.0E0     |
| <input type="checkbox"/> | <b>INTERPRO</b>        | <a href="#">Serine/threonine protein kinase, active site</a>                            | <b>RT</b> |  |  |  |  |  |  | 56    | 2.8E-1  | 1.0E0     |
| <input type="checkbox"/> | <b>SP_PIR_KEYWORDS</b> | <a href="#">serine/threonine-protein kinase</a>                                         | <b>RT</b> |  |  |  |  |  |  | 34    | 7.9E-1  | 9.9E-1    |
| <input type="checkbox"/> | <b>INTERPRO</b>        | <a href="#">Protein kinase, ATP binding site</a>                                        | <b>RT</b> |  |  |  |  |  |  | 42    | 9.5E-1  | 1.0E0     |
|                          | Annotation Cluster 6   | Enrichment Score: 0.53                                                                  |           |  |  |  |  |  |  | Count | P_Value | Benjamini |
| <input type="checkbox"/> | <b>INTERPRO</b>        | <a href="#">Thioredoxin fold</a>                                                        | <b>RT</b> |  |  |  |  |  |  | 17    | 1.2E-1  | 1.0E0     |
| <input type="checkbox"/> | <b>INTERPRO</b>        | <a href="#">Thioredoxin-like</a>                                                        | <b>RT</b> |  |  |  |  |  |  | 11    | 1.4E-1  | 1.0E0     |
| <input type="checkbox"/> | <b>GOTERM_BP_FAT</b>   | <a href="#">cell redox homeostasis</a>                                                  | <b>RT</b> |  |  |  |  |  |  | 14    | 1.8E-1  | 1.0E0     |
| <input type="checkbox"/> | <b>INTERPRO</b>        | <a href="#">Alkyl hydroperoxide reductase/ Thiol specific antioxidant/ Mal allergen</a> | <b>RT</b> |  |  |  |  |  |  | 6     | 2.1E-1  | 1.0E0     |
| <input type="checkbox"/> | <b>GOTERM_BP_FAT</b>   | <a href="#">cellular homeostasis</a>                                                    | <b>RT</b> |  |  |  |  |  |  | 14    | 2.8E-1  | 1.0E0     |
| <input type="checkbox"/> | <b>GOTERM_BP_FAT</b>   | <a href="#">homeostatic process</a>                                                     | <b>RT</b> |  |  |  |  |  |  | 14    | 3.8E-1  | 1.0E0     |
| <input type="checkbox"/> | <b>INTERPRO</b>        | <a href="#">Thioredoxin, core</a>                                                       | <b>RT</b> |  |  |  |  |  |  | 6     | 3.8E-1  | 1.0E0     |
| <input type="checkbox"/> | <b>GOTERM_MF_FAT</b>   | <a href="#">antioxidant activity</a>                                                    | <b>RT</b> |  |  |  |  |  |  | 6     | 4.0E-1  | 1.0E0     |
| <input type="checkbox"/> | <b>INTERPRO</b>        | <a href="#">Thioredoxin domain</a>                                                      | <b>RT</b> |  |  |  |  |  |  | 5     | 5.1E-1  | 1.0E0     |
| <input type="checkbox"/> | <b>INTERPRO</b>        | <a href="#">Thioredoxin, conserved site</a>                                             | <b>RT</b> |  |  |  |  |  |  | 5     | 5.1E-1  | 1.0E0     |
| <input type="checkbox"/> | <b>INTERPRO</b>        | <a href="#">Thioredoxin-like subdomain</a>                                              | <b>RT</b> |  |  |  |  |  |  | 4     | 6.5E-1  | 1.0E0     |
|                          | Annotation Cluster 7   | Enrichment Score: 0.49                                                                  |           |  |  |  |  |  |  | Count | P_Value | Benjamini |
| <input type="checkbox"/> | <b>INTERPRO</b>        | <a href="#">EGF-like, type 3</a>                                                        | <b>RT</b> |  |  |  |  |  |  | 23    | 1.5E-1  | 1.0E0     |
| <input type="checkbox"/> | <b>INTERPRO</b>        | <a href="#">EGF, extracellular</a>                                                      | <b>RT</b> |  |  |  |  |  |  | 16    | 3.2E-1  | 1.0E0     |
| <input type="checkbox"/> | <b>INTERPRO</b>        | <a href="#">EGF</a>                                                                     | <b>RT</b> |  |  |  |  |  |  | 6     | 3.8E-1  | 1.0E0     |
| <input type="checkbox"/> | <b>SP_PIR_KEYWORDS</b> | <a href="#">egf-like domain</a>                                                         | <b>RT</b> |  |  |  |  |  |  | 11    | 5.9E-1  | 9.9E-1    |
|                          | Annotation Cluster 8   | Enrichment Score: 0.45                                                                  |           |  |  |  |  |  |  | Count | P_Value | Benjamini |
| <input type="checkbox"/> | <b>GOTERM_BP_FAT</b>   | <a href="#">vesicle-mediated transport</a>                                              | <b>RT</b> |  |  |  |  |  |  | 21    | 1.8E-1  | 1.0E0     |
| <input type="checkbox"/> | <b>GOTERM_BP_FAT</b>   | <a href="#">intracellular transport</a>                                                 | <b>RT</b> |  |  |  |  |  |  | 20    | 2.2E-1  | 1.0E0     |
| <input type="checkbox"/> | <b>GOTERM_CC_FAT</b>   | <a href="#">coated membrane</a>                                                         | <b>RT</b> |  |  |  |  |  |  | 11    | 2.4E-1  | 1.0E0     |
| <input type="checkbox"/> | <b>GOTERM_CC_FAT</b>   | <a href="#">membrane coat</a>                                                           | <b>RT</b> |  |  |  |  |  |  | 11    | 2.4E-1  | 1.0E0     |
| <input type="checkbox"/> | <b>GOTERM_CC_FAT</b>   | <a href="#">endomembrane system</a>                                                     | <b>RT</b> |  |  |  |  |  |  | 12    | 2.9E-1  | 1.0E0     |
| <input type="checkbox"/> | <b>GOTERM_BP_FAT</b>   | <a href="#">cellular protein localization</a>                                           | <b>RT</b> |  |  |  |  |  |  | 16    | 3.5E-1  | 1.0E0     |
| <input type="checkbox"/> | <b>GOTERM_BP_FAT</b>   | <a href="#">intracellular protein transport</a>                                         | <b>RT</b> |  |  |  |  |  |  | 16    | 3.5E-1  | 1.0E0     |
| <input type="checkbox"/> | <b>GOTERM_BP_FAT</b>   | <a href="#">cellular macromolecule localization</a>                                     | <b>RT</b> |  |  |  |  |  |  | 16    | 3.5E-1  | 1.0E0     |
| <input type="checkbox"/> | <b>GOTERM_CC_FAT</b>   | <a href="#">Golgi apparatus</a>                                                         | <b>RT</b> |  |  |  |  |  |  | 8     | 5.0E-1  | 1.0E0     |
| <input type="checkbox"/> | <b>GOTERM_BP_FAT</b>   | <a href="#">establishment of protein localization</a>                                   | <b>RT</b> |  |  |  |  |  |  | 20    | 6.4E-1  | 1.0E0     |
| <input type="checkbox"/> | <b>GOTERM_BP_FAT</b>   | <a href="#">protein transport</a>                                                       | <b>RT</b> |  |  |  |  |  |  | 20    | 6.4E-1  | 1.0E0     |
| <input type="checkbox"/> | <b>GOTERM_BP_FAT</b>   | <a href="#">protein localization</a>                                                    | <b>RT</b> |  |  |  |  |  |  | 20    | 7.1E-1  | 1.0E0     |
|                          | Annotation Cluster 9   | Enrichment Score: 0.44                                                                  |           |  |  |  |  |  |  | Count | P_Value | Benjamini |
| <input type="checkbox"/> | <b>INTERPRO</b>        | <a href="#">SET</a>                                                                     | <b>RT</b> |  |  |  |  |  |  | 6     | 2.1E-1  | 1.0E0     |
| <input type="checkbox"/> | <b>SMART</b>           | <a href="#">SET</a>                                                                     | <b>RT</b> |  |  |  |  |  |  | 6     | 2.1E-1  | 1.0E0     |
| <input type="checkbox"/> | <b>INTERPRO</b>        | <a href="#">Post-SET zinc-binding region</a>                                            | <b>RT</b> |  |  |  |  |  |  | 3     | 6.2E-1  | 1.0E0     |
| <input type="checkbox"/> | <b>SMART</b>           | <a href="#">PostSET</a>                                                                 | <b>RT</b> |  |  |  |  |  |  | 3     | 6.3E-1  | 1.0E0     |
|                          | Annotation Cluster 10  | Enrichment Score: 0.42                                                                  |           |  |  |  |  |  |  | Count | P_Value | Benjamini |
| <input type="checkbox"/> | <b>INTERPRO</b>        | <a href="#">EGF-like, type 3</a>                                                        | <b>RT</b> |  |  |  |  |  |  | 23    | 1.5E-1  | 1.0E0     |
| <input type="checkbox"/> | <b>INTERPRO</b>        | <a href="#">EGF-like, laminin</a>                                                       | <b>RT</b> |  |  |  |  |  |  | 16    | 6.0E-1  | 1.0E0     |
| <input type="checkbox"/> | <b>SMART</b>           | <a href="#">EGF_Lam</a>                                                                 | <b>RT</b> |  |  |  |  |  |  | 16    | 6.2E-1  | 1.0E0     |
|                          | Annotation Cluster 11  | Enrichment Score: 0.37                                                                  |           |  |  |  |  |  |  | Count | P_Value | Benjamini |
| <input type="checkbox"/> | <b>GOTERM_BP_FAT</b>   | <a href="#">chromosome organization</a>                                                 | <b>RT</b> |  |  |  |  |  |  | 15    | 1.4E-1  | 1.0E0     |
| <input type="checkbox"/> | <b>GOTERM_CC_FAT</b>   | <a href="#">chromosome</a>                                                              | <b>RT</b> |  |  |  |  |  |  | 20    | 1.4E-1  | 1.0E0     |
| <input type="checkbox"/> | <b>GOTERM_CC_FAT</b>   | <a href="#">chromosomal part</a>                                                        | <b>RT</b> |  |  |  |  |  |  | 13    | 2.2E-1  | 1.0E0     |
| <input type="checkbox"/> | <b>INTERPRO</b>        | <a href="#">Histone-fold</a>                                                            | <b>RT</b> |  |  |  |  |  |  | 11    | 2.3E-1  | 1.0E0     |
| <input type="checkbox"/> | <b>GOTERM_CC_FAT</b>   | <a href="#">protein-DNA complex</a>                                                     | <b>RT</b> |  |  |  |  |  |  | 10    | 3.2E-1  | 1.0E0     |
| <input type="checkbox"/> | <b>GOTERM_BP_FAT</b>   | <a href="#">chromatin assembly or disassembly</a>                                       | <b>RT</b> |  |  |  |  |  |  | 10    | 3.2E-1  | 1.0E0     |
| <input type="checkbox"/> | <b>GOTERM_BP_FAT</b>   | <a href="#">chromatin organization</a>                                                  | <b>RT</b> |  |  |  |  |  |  | 11    | 3.7E-1  | 1.0E0     |
| <input type="checkbox"/> | <b>SP_PIR_KEYWORDS</b> | <a href="#">nucleosome core</a>                                                         | <b>RT</b> |  |  |  |  |  |  | 6     | 3.8E-1  | 1.0E0     |
| <input type="checkbox"/> | <b>GOTERM_CC_FAT</b>   | <a href="#">chromatin</a>                                                               | <b>RT</b> |  |  |  |  |  |  | 9     | 4.0E-1  | 1.0E0     |
| <input type="checkbox"/> | <b>GOTERM_BP_FAT</b>   | <a href="#">cellular macromolecular complex assembly</a>                                | <b>RT</b> |  |  |  |  |  |  | 16    | 4.5E-1  | 1.0E0     |

|                          |                 |                                                                      |    |  |                        |        |        |                         |
|--------------------------|-----------------|----------------------------------------------------------------------|----|--|------------------------|--------|--------|-------------------------|
| <input type="checkbox"/> | INTERPRO        | <a href="#">Histone core</a>                                         | RT |  | 8                      | 4.8E-1 | 1.0EO  |                         |
| <input type="checkbox"/> | SP_PIR_KEYWORDS | <a href="#">chromosomal protein</a>                                  | RT |  | 8                      | 4.9E-1 | 1.0EO  |                         |
| <input type="checkbox"/> | SP_PIR_KEYWORDS | <a href="#">dna-binding</a>                                          | RT |  | 22                     | 4.9E-1 | 1.0EO  |                         |
| <input type="checkbox"/> | GOTERM_CC_FAT   | <a href="#">nucleosome</a>                                           | RT |  | 8                      | 5.0E-1 | 1.0EO  |                         |
| <input type="checkbox"/> | GOTERM_BP_FAT   | <a href="#">chromatin assembly</a>                                   | RT |  | 8                      | 5.1E-1 | 1.0EO  |                         |
| <input type="checkbox"/> | GOTERM_BP_FAT   | <a href="#">protein-DNA complex assembly</a>                         | RT |  | 8                      | 5.1E-1 | 1.0EO  |                         |
| <input type="checkbox"/> | GOTERM_BP_FAT   | <a href="#">nucleosome organization</a>                              | RT |  | 8                      | 5.1E-1 | 1.0EO  |                         |
| <input type="checkbox"/> | GOTERM_BP_FAT   | <a href="#">nucleosome assembly</a>                                  | RT |  | 8                      | 5.1E-1 | 1.0EO  |                         |
| <input type="checkbox"/> | GOTERM_BP_FAT   | <a href="#">DNA packaging</a>                                        | RT |  | 8                      | 5.1E-1 | 1.0EO  |                         |
| <input type="checkbox"/> | GOTERM_BP_FAT   | <a href="#">cellular macromolecular complex subunit organization</a> | RT |  | 16                     | 5.5E-1 | 1.0EO  |                         |
| <input type="checkbox"/> | PIR_SUPERFAMILY | PIRSF002052:histone H4                                               | RT |  | 3                      | 5.9E-1 | 1.0EO  |                         |
| <input type="checkbox"/> | INTERPRO        | <a href="#">Histone H4</a>                                           | RT |  | 3                      | 6.2E-1 | 1.0EO  |                         |
| <input type="checkbox"/> | SMART           | <a href="#">H4</a>                                                   | RT |  | 3                      | 6.3E-1 | 1.0EO  |                         |
| <input type="checkbox"/> | GOTERM_BP_FAT   | <a href="#">macromolecular complex assembly</a>                      | RT |  | 16                     | 6.4E-1 | 1.0EO  |                         |
| <input type="checkbox"/> | SP_PIR_KEYWORDS | <a href="#">nucleus</a>                                              | RT |  | 20                     | 6.8E-1 | 9.9E-1 |                         |
| <input type="checkbox"/> | GOTERM_BP_FAT   | <a href="#">macromolecular complex subunit organization</a>          | RT |  | 16                     | 7.2E-1 | 1.0EO  |                         |
| Annotation Cluster 12    |                 |                                                                      |    |  | Enrichment Score: 0.35 |        |        | Count P_Value Benjamini |
| <input type="checkbox"/> | INTERPRO        | <a href="#">Ubiquitin supergroup</a>                                 | RT |  | 10                     | 1.9E-1 | 1.0EO  |                         |
| <input type="checkbox"/> | INTERPRO        | <a href="#">Ubiquitin</a>                                            | RT |  | 5                      | 6.7E-1 | 1.0EO  |                         |
| <input type="checkbox"/> | SMART           | <a href="#">UBQ</a>                                                  | RT |  | 5                      | 6.8E-1 | 1.0EO  |                         |
| Annotation Cluster 13    |                 |                                                                      |    |  | Enrichment Score: 0.35 |        |        | Count P_Value Benjamini |
| <input type="checkbox"/> | GOTERM_CC_FAT   | <a href="#">cytosolic part</a>                                       | RT |  | 8                      | 2.1E-1 | 1.0EO  |                         |
| <input type="checkbox"/> | GOTERM_CC_FAT   | <a href="#">prefoldin complex</a>                                    | RT |  | 6                      | 2.1E-1 | 1.0EO  |                         |
| <input type="checkbox"/> | INTERPRO        | <a href="#">Prefoldin alpha-like</a>                                 | RT |  | 3                      | 6.2E-1 | 1.0EO  |                         |
| <input type="checkbox"/> | INTERPRO        | <a href="#">Prefoldin beta-like</a>                                  | RT |  | 3                      | 6.2E-1 | 1.0EO  |                         |
| <input type="checkbox"/> | GOTERM_MF_FAT   | <a href="#">unfolded protein binding</a>                             | RT |  | 13                     | 6.7E-1 | 1.0EO  |                         |
| <input type="checkbox"/> | GOTERM_BP_FAT   | <a href="#">protein folding</a>                                      | RT |  | 18                     | 6.8E-1 | 1.0EO  |                         |
| Annotation Cluster 14    |                 |                                                                      |    |  | Enrichment Score: 0.34 |        |        | Count P_Value Benjamini |
| <input type="checkbox"/> | GOTERM_MF_FAT   | <a href="#">protein serine/threonine kinase activity</a>             | RT |  | 68                     | 1.5E-1 | 1.0EO  |                         |
| <input type="checkbox"/> | INTERPRO        | <a href="#">Protein kinase, core</a>                                 | RT |  | 162                    | 2.0E-1 | 1.0EO  |                         |
| <input type="checkbox"/> | GOTERM_BP_FAT   | <a href="#">protein amino acid phosphorylation</a>                   | RT |  | 164                    | 2.4E-1 | 1.0EO  |                         |
| <input type="checkbox"/> | INTERPRO        | <a href="#">Serine/threonine protein kinase, active site</a>         | RT |  | 56                     | 2.8E-1 | 1.0EO  |                         |
| <input type="checkbox"/> | GOTERM_MF_FAT   | <a href="#">protein kinase activity</a>                              | RT |  | 165                    | 2.8E-1 | 1.0EO  |                         |
| <input type="checkbox"/> | GOTERM_BP_FAT   | <a href="#">phosphorylation</a>                                      | RT |  | 174                    | 3.0E-1 | 1.0EO  |                         |
| <input type="checkbox"/> | SP_PIR_KEYWORDS | <a href="#">kinase</a>                                               | RT |  | 197                    | 3.0E-1 | 1.0EO  |                         |
| <input type="checkbox"/> | GOTERM_BP_FAT   | <a href="#">phosphate metabolic process</a>                          | RT |  | 183                    | 3.2E-1 | 1.0EO  |                         |
| <input type="checkbox"/> | GOTERM_BP_FAT   | <a href="#">phosphorus metabolic process</a>                         | RT |  | 183                    | 3.2E-1 | 1.0EO  |                         |
| <input type="checkbox"/> | INTERPRO        | <a href="#">Serine/threonine protein kinase-related</a>              | RT |  | 139                    | 3.6E-1 | 1.0EO  |                         |
| <input type="checkbox"/> | GOTERM_MF_FAT   | <a href="#">adenyl nucleotide binding</a>                            | RT |  | 311                    | 6.6E-1 | 1.0EO  |                         |
| <input type="checkbox"/> | GOTERM_MF_FAT   | <a href="#">purine nucleoside binding</a>                            | RT |  | 311                    | 6.6E-1 | 1.0EO  |                         |
| <input type="checkbox"/> | GOTERM_MF_FAT   | <a href="#">ATP binding</a>                                          | RT |  | 306                    | 6.9E-1 | 1.0EO  |                         |
| <input type="checkbox"/> | GOTERM_MF_FAT   | <a href="#">adenyl ribonucleotide binding</a>                        | RT |  | 306                    | 6.9E-1 | 1.0EO  |                         |
| <input type="checkbox"/> | GOTERM_MF_FAT   | <a href="#">nucleoside binding</a>                                   | RT |  | 312                    | 7.1E-1 | 1.0EO  |                         |
| <input type="checkbox"/> | GOTERM_MF_FAT   | <a href="#">nucleotide binding</a>                                   | RT |  | 359                    | 7.2E-1 | 1.0EO  |                         |
| <input type="checkbox"/> | GOTERM_MF_FAT   | <a href="#">purine nucleotide binding</a>                            | RT |  | 337                    | 7.5E-1 | 1.0EO  |                         |
| <input type="checkbox"/> | GOTERM_MF_FAT   | <a href="#">purine ribonucleotide binding</a>                        | RT |  | 332                    | 7.8E-1 | 1.0EO  |                         |
| <input type="checkbox"/> | GOTERM_MF_FAT   | <a href="#">ribonucleotide binding</a>                               | RT |  | 332                    | 7.8E-1 | 1.0EO  |                         |
| <input type="checkbox"/> | SP_PIR_KEYWORDS | <a href="#">atp-binding</a>                                          | RT |  | 141                    | 9.1E-1 | 1.0EO  |                         |
| <input type="checkbox"/> | SP_PIR_KEYWORDS | <a href="#">nucleotide-binding</a>                                   | RT |  | 141                    | 9.9E-1 | 1.0EO  |                         |
| Annotation Cluster 15    |                 |                                                                      |    |  | Enrichment Score: 0.32 |        |        | Count P_Value Benjamini |
| <input type="checkbox"/> | INTERPRO        | <a href="#">Peptidase M14, carboxypeptidase A</a>                    | RT |  | 5                      | 3.1E-1 | 1.0EO  |                         |
| <input type="checkbox"/> | SMART           | <a href="#">Zn_pept</a>                                              | RT |  | 5                      | 3.1E-1 | 1.0EO  |                         |
| <input type="checkbox"/> | GOTERM_MF_FAT   | <a href="#">metalloexopeptidase activity</a>                         | RT |  | 6                      | 4.0E-1 | 1.0EO  |                         |
| <input type="checkbox"/> | GOTERM_MF_FAT   | <a href="#">metallocarboxypeptidase activity</a>                     | RT |  | 4                      | 4.6E-1 | 1.0EO  |                         |
| <input type="checkbox"/> | GOTERM_MF_FAT   | <a href="#">carboxypeptidase activity</a>                            | RT |  | 4                      | 4.6E-1 | 1.0EO  |                         |
| <input type="checkbox"/> | GOTERM_MF_FAT   | <a href="#">exopeptidase activity</a>                                | RT |  | 7                      | 7.4E-1 | 1.0EO  |                         |
| <input type="checkbox"/> | GOTERM_MF_FAT   | <a href="#">metallopeptidase activity</a>                            | RT |  | 7                      | 8.9E-1 | 1.0EO  |                         |

| Annotation Cluster 16    |                 | Enrichment Score: 0.31                                                                              |    |  | Count | P_Value | Benjamini |
|--------------------------|-----------------|-----------------------------------------------------------------------------------------------------|----|--|-------|---------|-----------|
| <input type="checkbox"/> | INTERPRO        | <a href="#">Alkyl hydroperoxide reductase/ Thiol specific antioxidant/ Mal allergen</a>             | RT |  | 6     | 2.1E-1  | 1.0E0     |
| <input type="checkbox"/> | GOTERM_MF_FAT   | <a href="#">antioxidant activity</a>                                                                | RT |  | 6     | 4.0E-1  | 1.0E0     |
| <input type="checkbox"/> | INTERPRO        | <a href="#">Peroxiredoxin, C-terminal</a>                                                           | RT |  | 3     | 6.2E-1  | 1.0E0     |
| <input type="checkbox"/> | SP_PIR_KEYWORDS | <a href="#">peroxidase</a>                                                                          | RT |  | 3     | 6.2E-1  | 9.9E-1    |
| <input type="checkbox"/> | GOTERM_MF_FAT   | <a href="#">peroxidase activity</a>                                                                 | RT |  | 3     | 6.4E-1  | 1.0E0     |
| <input type="checkbox"/> | GOTERM_MF_FAT   | <a href="#">oxidoreductase activity, acting on peroxide as acceptor</a>                             | RT |  | 3     | 6.4E-1  | 1.0E0     |
| Annotation Cluster 17    |                 | Enrichment Score: 0.3                                                                               |    |  | Count | P_Value | Benjamini |
| <input type="checkbox"/> | INTERPRO        | <a href="#">RNA recognition motif, RNP-1</a>                                                        | RT |  | 10    | 4.3E-1  | 1.0E0     |
| <input type="checkbox"/> | SMART           | <a href="#">RRM</a>                                                                                 | RT |  | 10    | 4.4E-1  | 1.0E0     |
| <input type="checkbox"/> | INTERPRO        | <a href="#">Nucleotide-binding, alpha-beta plait</a>                                                | RT |  | 10    | 6.6E-1  | 1.0E0     |
| Annotation Cluster 18    |                 | Enrichment Score: 0.3                                                                               |    |  | Count | P_Value | Benjamini |
| <input type="checkbox"/> | GOTERM_CC_FAT   | <a href="#">coated membrane</a>                                                                     | RT |  | 11    | 2.4E-1  | 1.0E0     |
| <input type="checkbox"/> | GOTERM_CC_FAT   | <a href="#">membrane coat</a>                                                                       | RT |  | 11    | 2.4E-1  | 1.0E0     |
| <input type="checkbox"/> | GOTERM_CC_FAT   | <a href="#">Golgi apparatus part</a>                                                                | RT |  | 7     | 2.9E-1  | 1.0E0     |
| <input type="checkbox"/> | GOTERM_CC_FAT   | <a href="#">endomembrane system</a>                                                                 | RT |  | 12    | 2.9E-1  | 1.0E0     |
| <input type="checkbox"/> | GOTERM_CC_FAT   | <a href="#">Golgi apparatus</a>                                                                     | RT |  | 8     | 5.0E-1  | 1.0E0     |
| <input type="checkbox"/> | GOTERM_CC_FAT   | <a href="#">organelle membrane</a>                                                                  | RT |  | 8     | 5.0E-1  | 1.0E0     |
| <input type="checkbox"/> | GOTERM_CC_FAT   | <a href="#">cytoplasmic membrane-bounded vesicle</a>                                                | RT |  | 5     | 5.2E-1  | 1.0E0     |
| <input type="checkbox"/> | GOTERM_CC_FAT   | <a href="#">cytoplasmic vesicle part</a>                                                            | RT |  | 5     | 5.2E-1  | 1.0E0     |
| <input type="checkbox"/> | GOTERM_CC_FAT   | <a href="#">vesicle membrane</a>                                                                    | RT |  | 5     | 5.2E-1  | 1.0E0     |
| <input type="checkbox"/> | GOTERM_CC_FAT   | <a href="#">coated vesicle membrane</a>                                                             | RT |  | 5     | 5.2E-1  | 1.0E0     |
| <input type="checkbox"/> | GOTERM_CC_FAT   | <a href="#">cytoplasmic vesicle membrane</a>                                                        | RT |  | 5     | 5.2E-1  | 1.0E0     |
| <input type="checkbox"/> | GOTERM_CC_FAT   | <a href="#">coated vesicle</a>                                                                      | RT |  | 5     | 5.2E-1  | 1.0E0     |
| <input type="checkbox"/> | GOTERM_CC_FAT   | <a href="#">vesicle coat</a>                                                                        | RT |  | 5     | 5.2E-1  | 1.0E0     |
| <input type="checkbox"/> | GOTERM_CC_FAT   | <a href="#">vesicle</a>                                                                             | RT |  | 5     | 5.2E-1  | 1.0E0     |
| <input type="checkbox"/> | GOTERM_CC_FAT   | <a href="#">membrane-bounded vesicle</a>                                                            | RT |  | 5     | 5.2E-1  | 1.0E0     |
| <input type="checkbox"/> | GOTERM_CC_FAT   | <a href="#">cytoplasmic vesicle</a>                                                                 | RT |  | 5     | 5.2E-1  | 1.0E0     |
| <input type="checkbox"/> | GOTERM_BP_FAT   | <a href="#">ER to Golgi vesicle-mediated transport</a>                                              | RT |  | 5     | 5.2E-1  | 1.0E0     |
| <input type="checkbox"/> | GOTERM_BP_FAT   | <a href="#">Golgi vesicle transport</a>                                                             | RT |  | 5     | 5.2E-1  | 1.0E0     |
| <input type="checkbox"/> | INTERPRO        | <a href="#">Clathrin/coatomer adaptor, adaptin-like, N-terminal</a>                                 | RT |  | 4     | 6.5E-1  | 1.0E0     |
| <input type="checkbox"/> | GOTERM_CC_FAT   | <a href="#">transport vesicle membrane</a>                                                          | RT |  | 4     | 6.6E-1  | 1.0E0     |
| <input type="checkbox"/> | GOTERM_CC_FAT   | <a href="#">transport vesicle</a>                                                                   | RT |  | 4     | 6.6E-1  | 1.0E0     |
| <input type="checkbox"/> | GOTERM_CC_FAT   | <a href="#">ER to Golgi transport vesicle membrane</a>                                              | RT |  | 3     | 8.1E-1  | 1.0E0     |
| <input type="checkbox"/> | GOTERM_CC_FAT   | <a href="#">ER to Golgi transport vesicle</a>                                                       | RT |  | 3     | 8.1E-1  | 1.0E0     |
| <input type="checkbox"/> | GOTERM_CC_FAT   | <a href="#">COPII vesicle coat</a>                                                                  | RT |  | 3     | 8.1E-1  | 1.0E0     |
| Annotation Cluster 19    |                 | Enrichment Score: 0.3                                                                               |    |  | Count | P_Value | Benjamini |
| <input type="checkbox"/> | INTERPRO        | <a href="#">EGF-like</a>                                                                            | RT |  | 116   | 2.7E-1  | 1.0E0     |
| <input type="checkbox"/> | SMART           | <a href="#">EGF</a>                                                                                 | RT |  | 116   | 3.1E-1  | 1.0E0     |
| <input type="checkbox"/> | INTERPRO        | <a href="#">Giardia variant-specific surface protein</a>                                            | RT |  | 139   | 4.9E-1  | 1.0E0     |
| <input type="checkbox"/> | INTERPRO        | <a href="#">Furin-like repeat</a>                                                                   | RT |  | 101   | 8.8E-1  | 1.0E0     |
| <input type="checkbox"/> | SMART           | <a href="#">FU</a>                                                                                  | RT |  | 101   | 9.1E-1  | 1.0E0     |
| Annotation Cluster 20    |                 | Enrichment Score: 0.28                                                                              |    |  | Count | P_Value | Benjamini |
| <input type="checkbox"/> | GOTERM_MF_FAT   | <a href="#">translation factor activity, nucleic acid binding</a>                                   | RT |  | 21    | 4.2E-1  | 1.0E0     |
| <input type="checkbox"/> | SP_PIR_KEYWORDS | <a href="#">Initiation factor</a>                                                                   | RT |  | 13    | 4.3E-1  | 1.0E0     |
| <input type="checkbox"/> | GOTERM_MF_FAT   | <a href="#">translation initiation factor activity</a>                                              | RT |  | 16    | 5.5E-1  | 1.0E0     |
| <input type="checkbox"/> | GOTERM_BP_FAT   | <a href="#">translational initiation</a>                                                            | RT |  | 7     | 7.3E-1  | 1.0E0     |
| Annotation Cluster 21    |                 | Enrichment Score: 0.28                                                                              |    |  | Count | P_Value | Benjamini |
| <input type="checkbox"/> | GOTERM_MF_FAT   | <a href="#">phosphatase activity</a>                                                                | RT |  | 29    | 3.3E-1  | 1.0E0     |
| <input type="checkbox"/> | GOTERM_MF_FAT   | <a href="#">iron ion binding</a>                                                                    | RT |  | 21    | 3.4E-1  | 1.0E0     |
| <input type="checkbox"/> | GOTERM_MF_FAT   | <a href="#">phosphoprotein phosphatase activity</a>                                                 | RT |  | 18    | 5.2E-1  | 1.0E0     |
| <input type="checkbox"/> | SP_PIR_KEYWORDS | <a href="#">iron</a>                                                                                | RT |  | 13    | 5.4E-1  | 1.0E0     |
| <input type="checkbox"/> | INTERPRO        | <a href="#">Serine/threonine-specific protein phosphatase and bis(5-nucleosyl)-tetraphosphatase</a> | RT |  | 10    | 5.5E-1  | 1.0E0     |
| <input type="checkbox"/> | SMART           | <a href="#">PP2Ac</a>                                                                               | RT |  | 10    | 5.7E-1  | 1.0E0     |
| <input type="checkbox"/> | PIR_SUPERFAMILY | PIRSF000908: serine/threonine-protein phosphatase, conventional type                                | RT |  | 5     | 7.5E-1  | 1.0E0     |
| <input type="checkbox"/> | INTERPRO        | <a href="#">Metallophosphoesterase</a>                                                              | RT |  | 12    | 7.8E-1  | 1.0E0     |
| Annotation Cluster 22    |                 | Enrichment Score: 0.28                                                                              |    |  | Count | P_Value | Benjamini |

|                          |                 |                                                                                       |    |  |                        |        |        |
|--------------------------|-----------------|---------------------------------------------------------------------------------------|----|--|------------------------|--------|--------|
| <input type="checkbox"/> | KEGG_PATHWAY    | <a href="#">Ribosome</a>                                                              | RT |  | 41                     | 2.1E-1 | 1.0EO  |
| <input type="checkbox"/> | GOTERM_CC_FAT   | <a href="#">ribonucleoprotein complex</a>                                             | RT |  | 61                     | 3.7E-1 | 1.0EO  |
| <input type="checkbox"/> | GOTERM_CC_FAT   | <a href="#">non-membrane-bounded organelle</a>                                        | RT |  | 94                     | 5.3E-1 | 1.0EO  |
| <input type="checkbox"/> | GOTERM_CC_FAT   | <a href="#">intracellular non-membrane-bounded organelle</a>                          | RT |  | 94                     | 5.3E-1 | 1.0EO  |
| <input type="checkbox"/> | SP_PIR_KEYWORDS | <a href="#">ribosomal protein</a>                                                     | RT |  | 43                     | 5.5E-1 | 1.0EO  |
| <input type="checkbox"/> | GOTERM_MF_FAT   | <a href="#">structural molecule activity</a>                                          | RT |  | 49                     | 6.5E-1 | 1.0EO  |
| <input type="checkbox"/> | GOTERM_CC_FAT   | <a href="#">ribosome</a>                                                              | RT |  | 44                     | 6.6E-1 | 1.0EO  |
| <input type="checkbox"/> | GOTERM_BP_FAT   | <a href="#">translation</a>                                                           | RT |  | 65                     | 7.0E-1 | 1.0EO  |
| <input type="checkbox"/> | GOTERM_MF_FAT   | <a href="#">structural constituent of ribosome</a>                                    | RT |  | 39                     | 8.0E-1 | 1.0EO  |
| Annotation Cluster 23    |                 |                                                                                       |    |  | Enrichment Score: 0.27 |        |        |
| <input type="checkbox"/> | KEGG_PATHWAY    | <a href="#">Terpenoid backbone biosynthesis</a>                                       | RT |  | 5                      | 4.2E-1 | 1.0EO  |
| <input type="checkbox"/> | GOTERM_BP_FAT   | <a href="#">lipid biosynthetic process</a>                                            | RT |  | 10                     | 4.5E-1 | 1.0EO  |
| <input type="checkbox"/> | GOTERM_BP_FAT   | <a href="#">isoprenoid metabolic process</a>                                          | RT |  | 4                      | 6.7E-1 | 1.0EO  |
| <input type="checkbox"/> | GOTERM_BP_FAT   | <a href="#">isoprenoid biosynthetic process</a>                                       | RT |  | 4                      | 6.7E-1 | 1.0EO  |
| Annotation Cluster 24    |                 |                                                                                       |    |  | Enrichment Score: 0.26 |        |        |
| <input type="checkbox"/> | INTERPRO        | <a href="#">Calcium-binding EF-hand</a>                                               | RT |  | 8                      | 4.8E-1 | 1.0EO  |
| <input type="checkbox"/> | INTERPRO        | <a href="#">EF hand</a>                                                               | RT |  | 8                      | 4.8E-1 | 1.0EO  |
| <input type="checkbox"/> | SMART           | <a href="#">EFh</a>                                                                   | RT |  | 8                      | 4.9E-1 | 1.0EO  |
| <input type="checkbox"/> | INTERPRO        | <a href="#">EF-HAND_1</a>                                                             | RT |  | 13                     | 5.3E-1 | 1.0EO  |
| <input type="checkbox"/> | SP_PIR_KEYWORDS | <a href="#">calcium</a>                                                               | RT |  | 10                     | 5.6E-1 | 9.9E-1 |
| <input type="checkbox"/> | INTERPRO        | <a href="#">EF-HAND_2</a>                                                             | RT |  | 11                     | 5.8E-1 | 1.0EO  |
| <input type="checkbox"/> | INTERPRO        | <a href="#">EF-Hand type</a>                                                          | RT |  | 10                     | 8.3E-1 | 1.0EO  |
| Annotation Cluster 25    |                 |                                                                                       |    |  | Enrichment Score: 0.25 |        |        |
| <input type="checkbox"/> | GOTERM_BP_FAT   | <a href="#">ncRNA metabolic process</a>                                               | RT |  | 37                     | 8.0E-2 | 1.0EO  |
| <input type="checkbox"/> | GOTERM_BP_FAT   | <a href="#">tRNA metabolic process</a>                                                | RT |  | 27                     | 2.7E-1 | 1.0EO  |
| <input type="checkbox"/> | INTERPRO        | <a href="#">Anticodon-binding</a>                                                     | RT |  | 4                      | 4.4E-1 | 1.0EO  |
| <input type="checkbox"/> | KEGG_PATHWAY    | <a href="#">Aminoacyl-tRNA biosynthesis</a>                                           | RT |  | 12                     | 6.4E-1 | 1.0EO  |
| <input type="checkbox"/> | INTERPRO        | <a href="#">Aminoacyl-tRNA synthetase, class II (G, H, P and S), conserved region</a> | RT |  | 4                      | 6.5E-1 | 1.0EO  |
| <input type="checkbox"/> | GOTERM_BP_FAT   | <a href="#">amino acid activation</a>                                                 | RT |  | 14                     | 6.8E-1 | 1.0EO  |
| <input type="checkbox"/> | GOTERM_BP_FAT   | <a href="#">tRNA aminoacylation</a>                                                   | RT |  | 14                     | 6.8E-1 | 1.0EO  |
| <input type="checkbox"/> | INTERPRO        | <a href="#">Aminoacyl-tRNA synthetase, class II, conserved region</a>                 | RT |  | 6                      | 6.9E-1 | 1.0EO  |
| <input type="checkbox"/> | GOTERM_BP_FAT   | <a href="#">tRNA aminoacylation for protein translation</a>                           | RT |  | 13                     | 7.4E-1 | 1.0EO  |
| <input type="checkbox"/> | GOTERM_MF_FAT   | <a href="#">ligase activity, forming carbon-oxygen bonds</a>                          | RT |  | 14                     | 7.6E-1 | 1.0EO  |
| <input type="checkbox"/> | GOTERM_MF_FAT   | <a href="#">ligase activity, forming aminoacyl-tRNA and related compounds</a>         | RT |  | 14                     | 7.6E-1 | 1.0EO  |
| <input type="checkbox"/> | GOTERM_MF_FAT   | <a href="#">aminoacyl-tRNA ligase activity</a>                                        | RT |  | 14                     | 7.6E-1 | 1.0EO  |
| <input type="checkbox"/> | SP_PIR_KEYWORDS | <a href="#">Aminoacyl-tRNA synthetase</a>                                             | RT |  | 13                     | 7.9E-1 | 9.9E-1 |
| <input type="checkbox"/> | SP_PIR_KEYWORDS | <a href="#">ligase</a>                                                                | RT |  | 30                     | 8.4E-1 | 9.9E-1 |
| Annotation Cluster 26    |                 |                                                                                       |    |  | Enrichment Score: 0.24 |        |        |
| <input type="checkbox"/> | INTERPRO        | <a href="#">Protein phosphatase 2C, manganese/magnesium aspartate binding site</a>    | RT |  | 4                      | 4.4E-1 | 1.0EO  |
| <input type="checkbox"/> | SP_PIR_KEYWORDS | <a href="#">protein phosphatase</a>                                                   | RT |  | 4                      | 4.5E-1 | 1.0EO  |
| <input type="checkbox"/> | GOTERM_MF_FAT   | <a href="#">protein serine/threonine phosphatase activity</a>                         | RT |  | 4                      | 4.6E-1 | 1.0EO  |
| <input type="checkbox"/> | INTERPRO        | <a href="#">Protein phosphatase 2C, N-terminal</a>                                    | RT |  | 5                      | 5.1E-1 | 1.0EO  |
| <input type="checkbox"/> | INTERPRO        | <a href="#">Protein phosphatase 2C-related</a>                                        | RT |  | 5                      | 5.1E-1 | 1.0EO  |
| <input type="checkbox"/> | INTERPRO        | <a href="#">Protein phosphatase 2C</a>                                                | RT |  | 5                      | 5.1E-1 | 1.0EO  |
| <input type="checkbox"/> | SMART           | <a href="#">PP2Cc</a>                                                                 | RT |  | 5                      | 5.2E-1 | 1.0EO  |
| <input type="checkbox"/> | SMART           | <a href="#">PP2C_SIG</a>                                                              | RT |  | 5                      | 5.2E-1 | 1.0EO  |
| <input type="checkbox"/> | GOTERM_CC_FAT   | <a href="#">protein serine/threonine phosphatase complex</a>                          | RT |  | 5                      | 6.9E-1 | 1.0EO  |
| <input type="checkbox"/> | GOTERM_BP_FAT   | <a href="#">dephosphorylation</a>                                                     | RT |  | 10                     | 6.9E-1 | 1.0EO  |
| <input type="checkbox"/> | GOTERM_BP_FAT   | <a href="#">protein amino acid dephosphorylation</a>                                  | RT |  | 8                      | 7.5E-1 | 1.0EO  |
| <input type="checkbox"/> | GOTERM_MF_FAT   | <a href="#">magnesium ion binding</a>                                                 | RT |  | 9                      | 7.7E-1 | 1.0EO  |
| <input type="checkbox"/> | SP_PIR_KEYWORDS | <a href="#">magnesium</a>                                                             | RT |  | 7                      | 8.1E-1 | 9.9E-1 |
| Annotation Cluster 27    |                 |                                                                                       |    |  | Enrichment Score: 0.23 |        |        |
| <input type="checkbox"/> | GOTERM_BP_FAT   | <a href="#">methylation</a>                                                           | RT |  | 8                      | 3.6E-1 | 1.0EO  |
| <input type="checkbox"/> | INTERPRO        | <a href="#">Ribosomal RNA methyltransferase RrmJ/FtsJ</a>                             | RT |  | 4                      | 4.4E-1 | 1.0EO  |
| <input type="checkbox"/> | GOTERM_BP_FAT   | <a href="#">one-carbon metabolic process</a>                                          | RT |  | 8                      | 5.1E-1 | 1.0EO  |

| <input type="checkbox"/> | Annotation            | Enrichment Score                                                        | RT | Count | P_Value | Benjamini         |
|--------------------------|-----------------------|-------------------------------------------------------------------------|----|-------|---------|-------------------|
| <input type="checkbox"/> | GOTERM_BP_FAT         | <a href="#">RNA methylation</a>                                         | RT | 4     | 6.7E-1  | 1.0E0             |
| <input type="checkbox"/> | GOTERM_BP_FAT         | <a href="#">biopolymer methylation</a>                                  | RT | 4     | 8.1E-1  | 1.0E0             |
| <input type="checkbox"/> | GOTERM_BP_FAT         | <a href="#">RNA modification</a>                                        | RT | 8     | 9.3E-1  | 1.0E0             |
|                          | Annotation Cluster 28 | Enrichment Score: 0.23                                                  |    |       | Count   | P_Value Benjamini |
| <input type="checkbox"/> | GOTERM_BP_FAT         | <a href="#">translational elongation</a>                                | RT | 6     | 4.0E-1  | 1.0E0             |
| <input type="checkbox"/> | GOTERM_MF_FAT         | <a href="#">translation elongation factor activity</a>                  | RT | 6     | 5.8E-1  | 1.0E0             |
| <input type="checkbox"/> | SP_PIR_KEYWORDS       | <a href="#">elongation factor</a>                                       | RT | 5     | 6.8E-1  | 9.9E-1            |
| <input type="checkbox"/> | INTERPRO              | <a href="#">Protein synthesis factor, GTP-binding</a>                   | RT | 5     | 8.0E-1  | 1.0E0             |
|                          | Annotation Cluster 29 | Enrichment Score: 0.22                                                  |    |       | Count   | P_Value Benjamini |
| <input type="checkbox"/> | INTERPRO              | <a href="#">Zinc finger, C2H2-like</a>                                  | RT | 12    | 5.0E-1  | 1.0E0             |
| <input type="checkbox"/> | SMART                 | <a href="#">ZnF_C2H2</a>                                                | RT | 12    | 5.1E-1  | 1.0E0             |
| <input type="checkbox"/> | INTERPRO              | <a href="#">Zinc finger, C2H2-type</a>                                  | RT | 10    | 8.3E-1  | 1.0E0             |
|                          | Annotation Cluster 30 | Enrichment Score: 0.21                                                  |    |       | Count   | P_Value Benjamini |
| <input type="checkbox"/> | INTERPRO              | <a href="#">ATPase, AAA-type_core</a>                                   | RT | 16    | 5.1E-1  | 1.0E0             |
| <input type="checkbox"/> | INTERPRO              | <a href="#">ATPase, AAA+ type_core</a>                                  | RT | 41    | 6.7E-1  | 1.0E0             |
| <input type="checkbox"/> | SMART                 | <a href="#">AAA</a>                                                     | RT | 41    | 7.0E-1  | 1.0E0             |
|                          | Annotation Cluster 31 | Enrichment Score: 0.2                                                   |    |       | Count   | P_Value Benjamini |
| <input type="checkbox"/> | GOTERM_MF_FAT         | <a href="#">enzyme activator activity</a>                               | RT | 7     | 4.6E-1  | 1.0E0             |
| <input type="checkbox"/> | GOTERM_MF_FAT         | <a href="#">nucleoside-triphosphatase regulator activity</a>            | RT | 9     | 5.5E-1  | 1.0E0             |
| <input type="checkbox"/> | GOTERM_BP_FAT         | <a href="#">regulation of GTPase activity</a>                           | RT | 6     | 5.7E-1  | 1.0E0             |
| <input type="checkbox"/> | GOTERM_BP_FAT         | <a href="#">regulation of hydrolase activity</a>                        | RT | 6     | 5.7E-1  | 1.0E0             |
| <input type="checkbox"/> | INTERPRO              | <a href="#">Arf GTPase activating protein</a>                           | RT | 3     | 6.2E-1  | 1.0E0             |
| <input type="checkbox"/> | SMART                 | <a href="#">ArfGap</a>                                                  | RT | 3     | 6.3E-1  | 1.0E0             |
| <input type="checkbox"/> | GOTERM_BP_FAT         | <a href="#">regulation of ARF GTPase activity</a>                       | RT | 3     | 6.3E-1  | 1.0E0             |
| <input type="checkbox"/> | GOTERM_MF_FAT         | <a href="#">ARF GTPase activator activity</a>                           | RT | 3     | 6.4E-1  | 1.0E0             |
| <input type="checkbox"/> | GOTERM_BP_FAT         | <a href="#">regulation of ARF protein signal transduction</a>           | RT | 4     | 6.7E-1  | 1.0E0             |
| <input type="checkbox"/> | GOTERM_BP_FAT         | <a href="#">regulation of Ras GTPase activity</a>                       | RT | 5     | 6.9E-1  | 1.0E0             |
| <input type="checkbox"/> | GOTERM_MF_FAT         | <a href="#">GTPase activator activity</a>                               | RT | 5     | 7.0E-1  | 1.0E0             |
| <input type="checkbox"/> | GOTERM_BP_FAT         | <a href="#">regulation of Ras protein signal transduction</a>           | RT | 6     | 7.1E-1  | 1.0E0             |
| <input type="checkbox"/> | GOTERM_BP_FAT         | <a href="#">regulation of small GTPase mediated signal transduction</a> | RT | 6     | 7.1E-1  | 1.0E0             |
| <input type="checkbox"/> | GOTERM_MF_FAT         | <a href="#">small GTPase regulator activity</a>                         | RT | 7     | 7.4E-1  | 1.0E0             |
| <input type="checkbox"/> | GOTERM_MF_FAT         | <a href="#">GTPase regulator activity</a>                               | RT | 7     | 7.4E-1  | 1.0E0             |
|                          | Annotation Cluster 32 | Enrichment Score: 0.19                                                  |    |       | Count   | P_Value Benjamini |
| <input type="checkbox"/> | GOTERM_MF_FAT         | <a href="#">RNA polymerase activity</a>                                 | RT | 16    | 4.6E-1  | 1.0E0             |
| <input type="checkbox"/> | GOTERM_MF_FAT         | <a href="#">nucleotidyltransferase activity</a>                         | RT | 44    | 5.2E-1  | 1.0E0             |
| <input type="checkbox"/> | GOTERM_MF_FAT         | <a href="#">DNA-directed RNA polymerase activity</a>                    | RT | 15    | 5.3E-1  | 1.0E0             |
| <input type="checkbox"/> | KEGG_PATHWAY          | <a href="#">Pyrimidine metabolism</a>                                   | RT | 19    | 5.4E-1  | 1.0E0             |
| <input type="checkbox"/> | KEGG_PATHWAY          | <a href="#">RNA polymerase</a>                                          | RT | 10    | 7.2E-1  | 1.0E0             |
| <input type="checkbox"/> | KEGG_PATHWAY          | <a href="#">Purine metabolism</a>                                       | RT | 17    | 7.4E-1  | 1.0E0             |
| <input type="checkbox"/> | SP_PIR_KEYWORDS       | <a href="#">nucleotidyltransferase</a>                                  | RT | 14    | 8.0E-1  | 9.9E-1            |
| <input type="checkbox"/> | SP_PIR_KEYWORDS       | <a href="#">dna-directed rna polymerase</a>                             | RT | 8     | 8.2E-1  | 9.9E-1            |
| <input type="checkbox"/> | GOTERM_BP_FAT         | <a href="#">transcription</a>                                           | RT | 14    | 8.7E-1  | 1.0E0             |
|                          | Annotation Cluster 33 | Enrichment Score: 0.18                                                  |    |       | Count   | P_Value Benjamini |
| <input type="checkbox"/> | INTERPRO              | <a href="#">Phox-like</a>                                               | RT | 4     | 6.5E-1  | 1.0E0             |
| <input type="checkbox"/> | SMART                 | <a href="#">PX</a>                                                      | RT | 4     | 6.6E-1  | 1.0E0             |
| <input type="checkbox"/> | GOTERM_MF_FAT         | <a href="#">phosphoinositide binding</a>                                | RT | 4     | 6.7E-1  | 1.0E0             |
|                          | Annotation Cluster 34 | Enrichment Score: 0.18                                                  |    |       | Count   | P_Value Benjamini |
| <input type="checkbox"/> | INTERPRO              | <a href="#">Cyclin, C-terminal</a>                                      | RT | 4     | 4.4E-1  | 1.0E0             |
| <input type="checkbox"/> | INTERPRO              | <a href="#">Cyclin, N-terminal</a>                                      | RT | 5     | 5.1E-1  | 1.0E0             |
| <input type="checkbox"/> | SP_PIR_KEYWORDS       | <a href="#">cyclin</a>                                                  | RT | 7     | 5.9E-1  | 9.9E-1            |
| <input type="checkbox"/> | INTERPRO              | <a href="#">Cyclin-related</a>                                          | RT | 4     | 7.9E-1  | 1.0E0             |
| <input type="checkbox"/> | INTERPRO              | <a href="#">Cyclin</a>                                                  | RT | 3     | 9.0E-1  | 1.0E0             |
| <input type="checkbox"/> | SMART                 | <a href="#">CYCLIN</a>                                                  | RT | 3     | 9.0E-1  | 1.0E0             |
|                          | Annotation Cluster 35 | Enrichment Score: 0.18                                                  |    |       | Count   | P_Value Benjamini |
| <input type="checkbox"/> | PIR_SUPERFAMILY       | PIRSF006621:Dus                                                         | RT | 3     | 5.9E-1  | 1.0E0             |
| <input type="checkbox"/> | INTERPRO              | <a href="#">tRNA-dihydrouridine synthase</a>                            | RT | 3     | 6.2E-1  | 1.0E0             |
| <input type="checkbox"/> | GOTERM_MF_FAT         | <a href="#">tRNA dihydrouridine synthase activity</a>                   | RT | 3     | 6.4E-1  | 1.0E0             |
| <input type="checkbox"/> | INTERPRO              | <a href="#">Aldolase-type TIM barrel</a>                                | RT | 6     | 6.9E-1  | 1.0E0             |

| <input type="checkbox"/> | Annotation Cluster                       | Enrichment Score | Term                                                                                                         | RT | Count | P_Value | Benjamini |
|--------------------------|------------------------------------------|------------------|--------------------------------------------------------------------------------------------------------------|----|-------|---------|-----------|
| <input type="checkbox"/> | GOTERM_MF_FAT<br>Annotation Cluster 36   | 0.17             | <a href="#">FAD binding</a>                                                                                  | RT | 4     | 8.1E-1  | 1.0EO     |
| <input type="checkbox"/> | INTERPRO                                 |                  | <a href="#">Copine</a>                                                                                       | RT | 4     | 6.5E-1  | 1.0EO     |
| <input type="checkbox"/> | INTERPRO                                 |                  | <a href="#">von Willebrand factor, type A</a>                                                                | RT | 5     | 6.7E-1  | 1.0EO     |
| <input type="checkbox"/> | SMART<br>Annotation Cluster 37           | 0.16             | <a href="#">VWA</a>                                                                                          | RT | 5     | 6.8E-1  | 1.0EO     |
| <input type="checkbox"/> | INTERPRO                                 |                  | <a href="#">Like-Sm ribonucleoprotein, eukaryotic and archaea-type, core</a>                                 | RT | 5     | 6.7E-1  | 1.0EO     |
| <input type="checkbox"/> | SMART                                    |                  | <a href="#">Sm</a>                                                                                           | RT | 5     | 6.8E-1  | 1.0EO     |
| <input type="checkbox"/> | INTERPRO<br>Annotation Cluster 38        | 0.16             | <a href="#">Like-Sm ribonucleoprotein, core</a>                                                              | RT | 7     | 7.1E-1  | 1.0EO     |
| <input type="checkbox"/> | GOTERM_MF_FAT                            |                  | <a href="#">hydrolase activity, acting on carbon-nitrogen (but not peptide) bonds, in linear amides</a>      | RT | 7     | 3.0E-1  | 1.0EO     |
| <input type="checkbox"/> | GOTERM_BP_FAT                            |                  | <a href="#">protein amino acid deacetylation</a>                                                             | RT | 5     | 5.2E-1  | 1.0EO     |
| <input type="checkbox"/> | INTERPRO                                 |                  | <a href="#">NAD-dependent histone deacetylase, silent information regulator Sir2</a>                         | RT | 4     | 6.5E-1  | 1.0EO     |
| <input type="checkbox"/> | GOTERM_BP_FAT                            |                  | <a href="#">negative regulation of macromolecule biosynthetic process</a>                                    | RT | 4     | 6.7E-1  | 1.0EO     |
| <input type="checkbox"/> | GOTERM_BP_FAT                            |                  | <a href="#">negative regulation of nucleobase, nucleoside, nucleotide and nucleic acid metabolic process</a> | RT | 4     | 6.7E-1  | 1.0EO     |
| <input type="checkbox"/> | GOTERM_BP_FAT                            |                  | <a href="#">negative regulation of biosynthetic process</a>                                                  | RT | 4     | 6.7E-1  | 1.0EO     |
| <input type="checkbox"/> | GOTERM_BP_FAT                            |                  | <a href="#">negative regulation of transcription, DNA-dependent</a>                                          | RT | 4     | 6.7E-1  | 1.0EO     |
| <input type="checkbox"/> | GOTERM_BP_FAT                            |                  | <a href="#">chromatin silencing</a>                                                                          | RT | 4     | 6.7E-1  | 1.0EO     |
| <input type="checkbox"/> | GOTERM_BP_FAT                            |                  | <a href="#">negative regulation of cellular biosynthetic process</a>                                         | RT | 4     | 6.7E-1  | 1.0EO     |
| <input type="checkbox"/> | GOTERM_BP_FAT                            |                  | <a href="#">negative regulation of gene expression, epigenetic</a>                                           | RT | 4     | 6.7E-1  | 1.0EO     |
| <input type="checkbox"/> | GOTERM_BP_FAT                            |                  | <a href="#">negative regulation of RNA metabolic process</a>                                                 | RT | 4     | 6.7E-1  | 1.0EO     |
| <input type="checkbox"/> | GOTERM_BP_FAT                            |                  | <a href="#">regulation of gene expression, epigenetic</a>                                                    | RT | 4     | 6.7E-1  | 1.0EO     |
| <input type="checkbox"/> | GOTERM_BP_FAT                            |                  | <a href="#">negative regulation of nitrogen compound metabolic process</a>                                   | RT | 4     | 6.7E-1  | 1.0EO     |
| <input type="checkbox"/> | GOTERM_BP_FAT                            |                  | <a href="#">negative regulation of transcription</a>                                                         | RT | 4     | 6.7E-1  | 1.0EO     |
| <input type="checkbox"/> | GOTERM_MF_FAT                            |                  | <a href="#">NAD binding</a>                                                                                  | RT | 4     | 6.7E-1  | 1.0EO     |
| <input type="checkbox"/> | GOTERM_BP_FAT                            |                  | <a href="#">negative regulation of macromolecule metabolic process</a>                                       | RT | 4     | 8.9E-1  | 1.0EO     |
| <input type="checkbox"/> | GOTERM_BP_FAT                            |                  | <a href="#">negative regulation of gene expression</a>                                                       | RT | 4     | 8.9E-1  | 1.0EO     |
| <input type="checkbox"/> | GOTERM_BP_FAT                            |                  | <a href="#">gene silencing</a>                                                                               | RT | 4     | 8.9E-1  | 1.0EO     |
| <input type="checkbox"/> | GOTERM_BP_FAT                            |                  | <a href="#">regulation of transcription, DNA-dependent</a>                                                   | RT | 6     | 9.4E-1  | 1.0EO     |
| <input type="checkbox"/> | GOTERM_BP_FAT                            |                  | <a href="#">regulation of RNA metabolic process</a>                                                          | RT | 6     | 9.4E-1  | 1.0EO     |
| <input type="checkbox"/> | GOTERM_MF_FAT<br>Annotation Cluster 39   | 0.16             | <a href="#">NAD or NADH binding</a>                                                                          | RT | 4     | 9.5E-1  | 1.0EO     |
| <input type="checkbox"/> | INTERPRO                                 |                  | <a href="#">Ankyrin</a>                                                                                      | RT | 251   | 6.2E-1  | 1.0EO     |
| <input type="checkbox"/> | SMART                                    |                  | <a href="#">ANK</a>                                                                                          | RT | 251   | 7.1E-1  | 1.0EO     |
| <input type="checkbox"/> | SP_PIR_KEYWORDS<br>Annotation Cluster 40 | 0.16             | <a href="#">ank repeat</a>                                                                                   | RT | 174   | 7.6E-1  | 9.9E-1    |
| <input type="checkbox"/> | GOTERM_BP_FAT                            |                  | <a href="#">lipid biosynthetic process</a>                                                                   | RT | 10    | 4.5E-1  | 1.0EO     |
| <input type="checkbox"/> | GOTERM_MF_FAT                            |                  | <a href="#">phosphotransferase activity, for other substituted phosphate groups</a>                          | RT | 4     | 4.6E-1  | 1.0EO     |
| <input type="checkbox"/> | INTERPRO                                 |                  | <a href="#">CDP-alcohol phosphatidyltransferase</a>                                                          | RT | 3     | 6.2E-1  | 1.0EO     |
| <input type="checkbox"/> | GOTERM_BP_FAT                            |                  | <a href="#">phospholipid metabolic process</a>                                                               | RT | 8     | 6.4E-1  | 1.0EO     |
| <input type="checkbox"/> | GOTERM_BP_FAT                            |                  | <a href="#">phospholipid biosynthetic process</a>                                                            | RT | 5     | 6.9E-1  | 1.0EO     |
| <input type="checkbox"/> | GOTERM_BP_FAT                            |                  | <a href="#">organophosphate metabolic process</a>                                                            | RT | 8     | 7.5E-1  | 1.0EO     |
| <input type="checkbox"/> | GOTERM_BP_FAT                            |                  | <a href="#">phosphoinositide metabolic process</a>                                                           | RT | 4     | 8.9E-1  | 1.0EO     |
| <input type="checkbox"/> | GOTERM_BP_FAT                            |                  | <a href="#">glycerophospholipid metabolic process</a>                                                        | RT | 4     | 8.9E-1  | 1.0EO     |
| <input type="checkbox"/> | GOTERM_BP_FAT                            |                  | <a href="#">glycerolipid metabolic process</a>                                                               | RT | 4     | 8.9E-1  | 1.0EO     |
| <input type="checkbox"/> | GOTERM_MF_FAT<br>Annotation Cluster 41   | 0.15             | <a href="#">inositol or phosphatidylinositol kinase activity</a>                                             | RT | 3     | 9.1E-1  | 1.0EO     |
| <input type="checkbox"/> | GOTERM_BP_FAT                            |                  | <a href="#">cellular amino acid biosynthetic process</a>                                                     | RT | 4     | 6.7E-1  | 1.0EO     |
| <input type="checkbox"/> | GOTERM_BP_FAT                            |                  | <a href="#">organic acid biosynthetic process</a>                                                            | RT | 5     | 6.9E-1  | 1.0EO     |
| <input type="checkbox"/> | GOTERM_BP_FAT                            |                  | <a href="#">carboxylic acid biosynthetic process</a>                                                         | RT | 5     | 6.9E-1  | 1.0EO     |
| <input type="checkbox"/> | GOTERM_BP_FAT<br>Annotation Cluster 42   | 0.15             | <a href="#">amine biosynthetic process</a>                                                                   | RT | 4     | 8.1E-1  | 1.0EO     |
| <input type="checkbox"/> | COG_ONTOLOGY                             |                  | <a href="#">Defense mechanisms</a>                                                                           | RT | 14    | 5.8E-1  | 1.0EO     |
| <input type="checkbox"/> | INTERPRO                                 |                  | <a href="#">ABC transporter, conserved site</a>                                                              | RT | 13    | 7.2E-1  | 1.0EO     |
| <input type="checkbox"/> |                                          |                  | <a href="#">ABC transporter-like</a>                                                                         | RT | 12    | 8.9E-1  | 1.0EO     |

| <input type="checkbox"/> | INTERPRO        | Annotation Cluster 43 | Enrichment Score: 0.14                                                               |    |  | Count | P_Value | Benjamini |
|--------------------------|-----------------|-----------------------|--------------------------------------------------------------------------------------|----|--|-------|---------|-----------|
| <input type="checkbox"/> | INTERPRO        |                       | <a href="#">ADP-ribosylation factor</a>                                              | RT |  | 4     | 4.4E-1  | 1.0E0     |
| <input type="checkbox"/> | SMART           |                       | <a href="#">ARF</a>                                                                  | RT |  | 4     | 4.5E-1  | 1.0E0     |
| <input type="checkbox"/> | PIR_SUPERFAMILY |                       | PIRSF001711:ADP-ribosylation factor                                                  | RT |  | 4     | 6.1E-1  | 1.0E0     |
| <input type="checkbox"/> | INTERPRO        |                       | <a href="#">ARF/SAR superfamily</a>                                                  | RT |  | 5     | 6.7E-1  | 1.0E0     |
| <input type="checkbox"/> | PIR_SUPERFAMILY |                       | PIRSF001710:Ras-related protein Rab                                                  | RT |  | 4     | 7.6E-1  | 1.0E0     |
| <input type="checkbox"/> | GOTERM_BP_FAT   |                       | <a href="#">intracellular signaling cascade</a>                                      | RT |  | 12    | 8.0E-1  | 1.0E0     |
| <input type="checkbox"/> | GOTERM_BP_FAT   |                       | <a href="#">small GTPase mediated signal transduction</a>                            | RT |  | 9     | 8.4E-1  | 1.0E0     |
| <input type="checkbox"/> | INTERPRO        |                       | <a href="#">Ras GTPase</a>                                                           | RT |  | 6     | 9.6E-1  | 1.0E0     |
| <input type="checkbox"/> | INTERPRO        |                       | <a href="#">Small GTP-binding protein</a>                                            | RT |  | 9     | 9.7E-1  | 1.0E0     |
| <input type="checkbox"/> | INTERPRO        |                       | <a href="#">Ras</a>                                                                  | RT |  | 5     | 9.8E-1  | 1.0E0     |
|                          |                 | Annotation Cluster 44 | Enrichment Score: 0.14                                                               |    |  | Count | P_Value | Benjamini |
| <input type="checkbox"/> | GOTERM_BP_FAT   |                       | <a href="#">DNA metabolic process</a>                                                | RT |  | 35    | 6.4E-1  | 1.0E0     |
| <input type="checkbox"/> | GOTERM_BP_FAT   |                       | <a href="#">response to DNA damage stimulus</a>                                      | RT |  | 12    | 7.3E-1  | 1.0E0     |
| <input type="checkbox"/> | GOTERM_BP_FAT   |                       | <a href="#">DNA repair</a>                                                           | RT |  | 12    | 7.3E-1  | 1.0E0     |
| <input type="checkbox"/> | GOTERM_BP_FAT   |                       | <a href="#">cellular response to stress</a>                                          | RT |  | 12    | 8.0E-1  | 1.0E0     |
|                          |                 | Annotation Cluster 45 | Enrichment Score: 0.14                                                               |    |  | Count | P_Value | Benjamini |
| <input type="checkbox"/> | INTERPRO        |                       | <a href="#">Multi antimicrobial extrusion protein MatE</a>                           | RT |  | 4     | 6.5E-1  | 1.0E0     |
| <input type="checkbox"/> | GOTERM_BP_FAT   |                       | <a href="#">multidrug transport</a>                                                  | RT |  | 4     | 6.7E-1  | 1.0E0     |
| <input type="checkbox"/> | GOTERM_BP_FAT   |                       | <a href="#">drug transport</a>                                                       | RT |  | 4     | 6.7E-1  | 1.0E0     |
| <input type="checkbox"/> | GOTERM_BP_FAT   |                       | <a href="#">response to drug</a>                                                     | RT |  | 4     | 6.7E-1  | 1.0E0     |
| <input type="checkbox"/> | GOTERM_MF_FAT   |                       | <a href="#">drug transporter activity</a>                                            | RT |  | 4     | 6.7E-1  | 1.0E0     |
| <input type="checkbox"/> | INTERPRO        |                       | <a href="#">Na+ driven multidrug efflux pump</a>                                     | RT |  | 3     | 8.0E-1  | 1.0E0     |
| <input type="checkbox"/> | GOTERM_MF_FAT   |                       | <a href="#">antiporter activity</a>                                                  | RT |  | 4     | 8.1E-1  | 1.0E0     |
| <input type="checkbox"/> | GOTERM_BP_FAT   |                       | <a href="#">transmembrane transport</a>                                              | RT |  | 11    | 9.0E-1  | 1.0E0     |
|                          |                 | Annotation Cluster 46 | Enrichment Score: 0.14                                                               |    |  | Count | P_Value | Benjamini |
| <input type="checkbox"/> | INTERPRO        |                       | <a href="#">Kinesin motor region, conserved site</a>                                 | RT |  | 12    | 5.0E-1  | 1.0E0     |
| <input type="checkbox"/> | SP_PIR_KEYWORDS |                       | <a href="#">microtubule</a>                                                          | RT |  | 20    | 5.3E-1  | 1.0E0     |
| <input type="checkbox"/> | SP_PIR_KEYWORDS |                       | <a href="#">motor protein</a>                                                        | RT |  | 15    | 5.9E-1  | 9.9E-1    |
| <input type="checkbox"/> | INTERPRO        |                       | <a href="#">Kinesin motor region</a>                                                 | RT |  | 17    | 6.2E-1  | 1.0E0     |
| <input type="checkbox"/> | GOTERM_CC_FAT   |                       | <a href="#">microtubule</a>                                                          | RT |  | 20    | 6.3E-1  | 1.0E0     |
| <input type="checkbox"/> | SMART           |                       | <a href="#">K1Sc</a>                                                                 | RT |  | 17    | 6.4E-1  | 1.0E0     |
| <input type="checkbox"/> | GOTERM_BP_FAT   |                       | <a href="#">microtubule-based movement</a>                                           | RT |  | 27    | 7.5E-1  | 1.0E0     |
| <input type="checkbox"/> | GOTERM_BP_FAT   |                       | <a href="#">microtubule-based process</a>                                            | RT |  | 30    | 8.3E-1  | 1.0E0     |
| <input type="checkbox"/> | GOTERM_CC_FAT   |                       | <a href="#">microtubule cytoskeleton</a>                                             | RT |  | 28    | 8.9E-1  | 1.0E0     |
| <input type="checkbox"/> | GOTERM_CC_FAT   |                       | <a href="#">cytoskeletal part</a>                                                    | RT |  | 28    | 8.9E-1  | 1.0E0     |
| <input type="checkbox"/> | GOTERM_MF_FAT   |                       | <a href="#">microtubule motor activity</a>                                           | RT |  | 22    | 9.2E-1  | 1.0E0     |
| <input type="checkbox"/> | GOTERM_MF_FAT   |                       | <a href="#">motor activity</a>                                                       | RT |  | 22    | 9.2E-1  | 1.0E0     |
| <input type="checkbox"/> | GOTERM_CC_FAT   |                       | <a href="#">cytoskeleton</a>                                                         | RT |  | 28    | 9.4E-1  | 1.0E0     |
|                          |                 | Annotation Cluster 47 | Enrichment Score: 0.13                                                               |    |  | Count | P_Value | Benjamini |
| <input type="checkbox"/> | INTERPRO        |                       | <a href="#">Pyridoxal phosphate-dependent transferase, major region, subdomain 1</a> | RT |  | 6     | 5.5E-1  | 1.0E0     |
| <input type="checkbox"/> | INTERPRO        |                       | <a href="#">Aminotransferase, class I and II</a>                                     | RT |  | 4     | 6.5E-1  | 1.0E0     |
| <input type="checkbox"/> | GOTERM_MF_FAT   |                       | <a href="#">vitamin binding</a>                                                      | RT |  | 7     | 7.4E-1  | 1.0E0     |
| <input type="checkbox"/> | GOTERM_MF_FAT   |                       | <a href="#">pyridoxal phosphate binding</a>                                          | RT |  | 6     | 8.2E-1  | 1.0E0     |
| <input type="checkbox"/> | GOTERM_MF_FAT   |                       | <a href="#">vitamin B6 binding</a>                                                   | RT |  | 6     | 8.2E-1  | 1.0E0     |
| <input type="checkbox"/> | GOTERM_MF_FAT   |                       | <a href="#">transferase activity, transferring nitrogenous groups</a>                | RT |  | 4     | 9.0E-1  | 1.0E0     |
|                          |                 | Annotation Cluster 48 | Enrichment Score: 0.12                                                               |    |  | Count | P_Value | Benjamini |
| <input type="checkbox"/> | INTERPRO        |                       | <a href="#">Amino acid transporter, transmembrane</a>                                | RT |  | 8     | 3.4E-1  | 1.0E0     |
| <input type="checkbox"/> | SP_PIR_KEYWORDS |                       | <a href="#">membrane</a>                                                             | RT |  | 14    | 9.0E-1  | 1.0E0     |
| <input type="checkbox"/> | SP_PIR_KEYWORDS |                       | <a href="#">transmembrane</a>                                                        | RT |  | 15    | 9.3E-1  | 1.0E0     |
| <input type="checkbox"/> | GOTERM_CC_FAT   |                       | <a href="#">integral to membrane</a>                                                 | RT |  | 34    | 9.6E-1  | 1.0E0     |
| <input type="checkbox"/> | GOTERM_CC_FAT   |                       | <a href="#">intrinsic to membrane</a>                                                | RT |  | 34    | 9.6E-1  | 1.0E0     |
|                          |                 | Annotation Cluster 49 | Enrichment Score: 0.11                                                               |    |  | Count | P_Value | Benjamini |
| <input type="checkbox"/> | INTERPRO        |                       | <a href="#">Myb, DNA-binding</a>                                                     | RT |  | 4     | 6.5E-1  | 1.0E0     |
| <input type="checkbox"/> | INTERPRO        |                       | <a href="#">Myb transcription factor</a>                                             | RT |  | 3     | 8.0E-1  | 1.0E0     |
| <input type="checkbox"/> | INTERPRO        |                       | <a href="#">Myb-type HTH DNA-binding domain</a>                                      | RT |  | 3     | 8.0E-1  | 1.0E0     |
| <input type="checkbox"/> | INTERPRO        |                       | <a href="#">SANT, DNA-binding</a>                                                    | RT |  | 6     | 8.0E-1  | 1.0E0     |



| <input type="checkbox"/> | SMART                 | <a href="#">SANT</a>                                                         | <a href="#">RT</a> |  | Count | P_Value | Benjamini |
|--------------------------|-----------------------|------------------------------------------------------------------------------|--------------------|--|-------|---------|-----------|
|                          | Annotation Cluster 50 | Enrichment Score: 0.1                                                        |                    |  |       |         |           |
| <input type="checkbox"/> | GOTERM_MF_FAT         | <a href="#">tetrapyrrole binding</a>                                         | <a href="#">RT</a> |  | 5     | 7.0E-1  | 1.0E0     |
| <input type="checkbox"/> | GOTERM_MF_FAT         | <a href="#">heme binding</a>                                                 | <a href="#">RT</a> |  | 5     | 7.0E-1  | 1.0E0     |
| <input type="checkbox"/> | INTERPRO              | <a href="#">Cytochrome b5</a>                                                | <a href="#">RT</a> |  | 3     | 9.0E-1  | 1.0E0     |
| <input type="checkbox"/> | SP_PIR_KEYWORDS       | <a href="#">heme</a>                                                         | <a href="#">RT</a> |  | 3     | 9.0E-1  | 1.0E0     |
|                          | Annotation Cluster 51 | Enrichment Score: 0.1                                                        |                    |  |       |         |           |
| <input type="checkbox"/> | INTERPRO              | <a href="#">RNA-directed DNA polymerase (reverse transcriptase), related</a> | <a href="#">RT</a> |  | 4     | 6.5E-1  | 1.0E0     |
| <input type="checkbox"/> | INTERPRO              | <a href="#">RNA-directed DNA polymerase (reverse transcriptase)</a>          | <a href="#">RT</a> |  | 5     | 6.7E-1  | 1.0E0     |
| <input type="checkbox"/> | GOTERM_BP_FAT         | <a href="#">RNA-dependent DNA replication</a>                                | <a href="#">RT</a> |  | 5     | 6.9E-1  | 1.0E0     |
| <input type="checkbox"/> | GOTERM_MF_FAT         | <a href="#">nuclease activity</a>                                            | <a href="#">RT</a> |  | 29    | 7.3E-1  | 1.0E0     |
| <input type="checkbox"/> | GOTERM_MF_FAT         | <a href="#">DNA polymerase activity</a>                                      | <a href="#">RT</a> |  | 19    | 8.2E-1  | 1.0E0     |
| <input type="checkbox"/> | SP_PIR_KEYWORDS       | <a href="#">rna-directed dna polymerase</a>                                  | <a href="#">RT</a> |  | 12    | 8.9E-1  | 1.0E0     |
| <input type="checkbox"/> | SP_PIR_KEYWORDS       | <a href="#">Endonuclease</a>                                                 | <a href="#">RT</a> |  | 15    | 9.3E-1  | 1.0E0     |
| <input type="checkbox"/> | GOTERM_MF_FAT         | <a href="#">RNA-directed DNA polymerase activity</a>                         | <a href="#">RT</a> |  | 12    | 9.4E-1  | 1.0E0     |
| <input type="checkbox"/> | GOTERM_MF_FAT         | <a href="#">endonuclease activity</a>                                        | <a href="#">RT</a> |  | 16    | 9.8E-1  | 1.0E0     |
|                          | Annotation Cluster 52 | Enrichment Score: 0.09                                                       |                    |  |       |         |           |
| <input type="checkbox"/> | INTERPRO              | <a href="#">Spc97/Spc98</a>                                                  | <a href="#">RT</a> |  | 3     | 8.0E-1  | 1.0E0     |
| <input type="checkbox"/> | GOTERM_CC_FAT         | <a href="#">microtubule organizing center</a>                                | <a href="#">RT</a> |  | 3     | 8.1E-1  | 1.0E0     |
| <input type="checkbox"/> | GOTERM_CC_FAT         | <a href="#">spindle pole</a>                                                 | <a href="#">RT</a> |  | 3     | 8.1E-1  | 1.0E0     |
| <input type="checkbox"/> | GOTERM_CC_FAT         | <a href="#">spindle</a>                                                      | <a href="#">RT</a> |  | 3     | 8.1E-1  | 1.0E0     |
| <input type="checkbox"/> | GOTERM_BP_FAT         | <a href="#">microtubule cytoskeleton organization</a>                        | <a href="#">RT</a> |  | 3     | 8.1E-1  | 1.0E0     |
|                          | Annotation Cluster 53 | Enrichment Score: 0.09                                                       |                    |  |       |         |           |
| <input type="checkbox"/> | GOTERM_BP_FAT         | <a href="#">nucleoside metabolic process</a>                                 | <a href="#">RT</a> |  | 8     | 7.5E-1  | 1.0E0     |
| <input type="checkbox"/> | GOTERM_BP_FAT         | <a href="#">purine ribonucleoside metabolic process</a>                      | <a href="#">RT</a> |  | 3     | 8.1E-1  | 1.0E0     |
| <input type="checkbox"/> | GOTERM_BP_FAT         | <a href="#">purine nucleoside metabolic process</a>                          | <a href="#">RT</a> |  | 3     | 8.1E-1  | 1.0E0     |
| <input type="checkbox"/> | GOTERM_BP_FAT         | <a href="#">ribonucleoside metabolic process</a>                             | <a href="#">RT</a> |  | 4     | 8.9E-1  | 1.0E0     |
|                          | Annotation Cluster 54 | Enrichment Score: 0.09                                                       |                    |  |       |         |           |
| <input type="checkbox"/> | GOTERM_MF_FAT         | <a href="#">GTPase activity</a>                                              | <a href="#">RT</a> |  | 11    | 6.2E-1  | 1.0E0     |
| <input type="checkbox"/> | SP_PIR_KEYWORDS       | <a href="#">gtp-binding</a>                                                  | <a href="#">RT</a> |  | 23    | 7.3E-1  | 9.9E-1    |
| <input type="checkbox"/> | GOTERM_BP_FAT         | <a href="#">small GTPase mediated signal transduction</a>                    | <a href="#">RT</a> |  | 9     | 8.4E-1  | 1.0E0     |
| <input type="checkbox"/> | GOTERM_MF_FAT         | <a href="#">guanyl nucleotide binding</a>                                    | <a href="#">RT</a> |  | 26    | 8.8E-1  | 1.0E0     |
| <input type="checkbox"/> | GOTERM_MF_FAT         | <a href="#">GTP binding</a>                                                  | <a href="#">RT</a> |  | 26    | 8.8E-1  | 1.0E0     |
| <input type="checkbox"/> | GOTERM_MF_FAT         | <a href="#">guanyl ribonucleotide binding</a>                                | <a href="#">RT</a> |  | 26    | 8.8E-1  | 1.0E0     |
| <input type="checkbox"/> | INTERPRO              | <a href="#">Small GTP-binding protein</a>                                    | <a href="#">RT</a> |  | 9     | 9.7E-1  | 1.0E0     |
|                          | Annotation Cluster 55 | Enrichment Score: 0.09                                                       |                    |  |       |         |           |
| <input type="checkbox"/> | SP_PIR_KEYWORDS       | <a href="#">ub1 conjugation pathway</a>                                      | <a href="#">RT</a> |  | 8     | 7.3E-1  | 9.9E-1    |
| <input type="checkbox"/> | GOTERM_MF_FAT         | <a href="#">small conjugating protein ligase activity</a>                    | <a href="#">RT</a> |  | 8     | 7.5E-1  | 1.0E0     |
| <input type="checkbox"/> | PIR_SUPERFAMILY       | PIRSF001567:ubiquitin-protein ligase E2                                      | <a href="#">RT</a> |  | 4     | 7.6E-1  | 1.0E0     |
| <input type="checkbox"/> | INTERPRO              | <a href="#">Ubiquitin-conjugating enzyme/RWD-like</a>                        | <a href="#">RT</a> |  | 7     | 8.1E-1  | 1.0E0     |
| <input type="checkbox"/> | INTERPRO              | <a href="#">Ubiquitin-conjugating enzyme, E2</a>                             | <a href="#">RT</a> |  | 7     | 8.1E-1  | 1.0E0     |
| <input type="checkbox"/> | SMART                 | <a href="#">UBCc</a>                                                         | <a href="#">RT</a> |  | 7     | 8.2E-1  | 1.0E0     |
| <input type="checkbox"/> | GOTERM_MF_FAT         | <a href="#">ligase activity, forming carbon-nitrogen bonds</a>               | <a href="#">RT</a> |  | 17    | 8.9E-1  | 1.0E0     |
| <input type="checkbox"/> | GOTERM_MF_FAT         | <a href="#">acid-amino acid ligase activity</a>                              | <a href="#">RT</a> |  | 14    | 9.1E-1  | 1.0E0     |
| <input type="checkbox"/> | KEGG_PATHWAY          | <a href="#">Ubiquitin mediated proteolysis</a>                               | <a href="#">RT</a> |  | 5     | 9.3E-1  | 1.0E0     |
|                          | Annotation Cluster 56 | Enrichment Score: 0.08                                                       |                    |  |       |         |           |
| <input type="checkbox"/> | GOTERM_CC_FAT         | <a href="#">cytosol</a>                                                      | <a href="#">RT</a> |  | 18    | 5.9E-1  | 1.0E0     |
| <input type="checkbox"/> | GOTERM_BP_FAT         | <a href="#">macromolecule catabolic process</a>                              | <a href="#">RT</a> |  | 23    | 6.9E-1  | 1.0E0     |
| <input type="checkbox"/> | SP_PIR_KEYWORDS       | <a href="#">ub1 conjugation pathway</a>                                      | <a href="#">RT</a> |  | 8     | 7.3E-1  | 9.9E-1    |
| <input type="checkbox"/> | KEGG_PATHWAY          | <a href="#">Proteasome</a>                                                   | <a href="#">RT</a> |  | 15    | 7.3E-1  | 1.0E0     |
| <input type="checkbox"/> | GOTERM_BP_FAT         | <a href="#">protein catabolic process</a>                                    | <a href="#">RT</a> |  | 22    | 7.4E-1  | 1.0E0     |
| <input type="checkbox"/> | PIR_SUPERFAMILY       | PIRSF001212: multicatalytic endopeptidase complex chain C9                   | <a href="#">RT</a> |  | 4     | 7.6E-1  | 1.0E0     |
| <input type="checkbox"/> | GOTERM_BP_FAT         | <a href="#">modification-dependent macromolecule catabolic process</a>       | <a href="#">RT</a> |  | 15    | 7.7E-1  | 1.0E0     |
| <input type="checkbox"/> | GOTERM_BP_FAT         | <a href="#">modification-dependent protein catabolic process</a>             | <a href="#">RT</a> |  | 15    | 7.7E-1  | 1.0E0     |
| <input type="checkbox"/> | GOTERM_BP_FAT         | <a href="#">cellular macromolecule catabolic process</a>                     | <a href="#">RT</a> |  | 19    | 8.2E-1  | 1.0E0     |
| <input type="checkbox"/> | GOTERM_BP_FAT         | <a href="#">proteolysis</a>                                                  | <a href="#">RT</a> |  | 49    | 8.4E-1  | 1.0E0     |
| <input type="checkbox"/> | GOTERM_BP_FAT         | <a href="#">cellular protein catabolic process</a>                           | <a href="#">RT</a> |  | 18    | 8.6E-1  | 1.0E0     |

| <input type="checkbox"/> | GOTERM_BP_FAT         | <a href="#">proteolysis involved in cellular protein catabolic process</a> | RT |  |  |  | 18    | 8.6E-1  | 1.0EO     |  |
|--------------------------|-----------------------|----------------------------------------------------------------------------|----|--|--|--|-------|---------|-----------|--|
| <input type="checkbox"/> | INTERPRO              | <a href="#">Proteasome, alpha and beta subunits</a>                        | RT |  |  |  | 7     | 8.8E-1  | 1.0EO     |  |
| <input type="checkbox"/> | INTERPRO              | <a href="#">Proteasome, alpha-subunit, conserved site</a>                  | RT |  |  |  | 4     | 8.9E-1  | 1.0EO     |  |
| <input type="checkbox"/> | GOTERM_CC_FAT         | <a href="#">proteasome complex</a>                                         | RT |  |  |  | 11    | 9.0E-1  | 1.0EO     |  |
| <input type="checkbox"/> | INTERPRO              | <a href="#">Proteasome, subunit alpha/beta</a>                             | RT |  |  |  | 7     | 9.2E-1  | 1.0EO     |  |
| <input type="checkbox"/> | SP_PIR_KEYWORDS       | <a href="#">proteasome</a>                                                 | RT |  |  |  | 10    | 9.3E-1  | 1.0EO     |  |
| <input type="checkbox"/> | GOTERM_BP_FAT         | <a href="#">ubiquitin-dependent protein catabolic process</a>              | RT |  |  |  | 7     | 9.3E-1  | 1.0EO     |  |
| <input type="checkbox"/> | GOTERM_CC_FAT         | <a href="#">proteasome core complex</a>                                    | RT |  |  |  | 7     | 9.3E-1  | 1.0EO     |  |
| <input type="checkbox"/> | GOTERM_MF_FAT         | <a href="#">threonine-type endopeptidase activity</a>                      | RT |  |  |  | 7     | 9.4E-1  | 1.0EO     |  |
| <input type="checkbox"/> | GOTERM_MF_FAT         | <a href="#">threonine-type peptidase activity</a>                          | RT |  |  |  | 7     | 9.4E-1  | 1.0EO     |  |
| <input type="checkbox"/> | SP_PIR_KEYWORDS       | <a href="#">threonine protease</a>                                         | RT |  |  |  | 3     | 9.5E-1  | 1.0EO     |  |
|                          | Annotation Cluster 57 | Enrichment Score: 0.07                                                     |    |  |  |  | Count | P_Value | Benjamini |  |
| <input type="checkbox"/> | GOTERM_MF_FAT         | <a href="#">GTPase activity</a>                                            | RT |  |  |  | 11    | 6.2E-1  | 1.0EO     |  |
| <input type="checkbox"/> | INTERPRO              | <a href="#">Tubulin/FtsZ, GTPase domain</a>                                | RT |  |  |  | 5     | 8.0E-1  | 1.0EO     |  |
| <input type="checkbox"/> | INTERPRO              | <a href="#">Tubulin</a>                                                    | RT |  |  |  | 5     | 8.0E-1  | 1.0EO     |  |
| <input type="checkbox"/> | INTERPRO              | <a href="#">Tubulin, conserved site</a>                                    | RT |  |  |  | 5     | 8.0E-1  | 1.0EO     |  |
| <input type="checkbox"/> | GOTERM_BP_FAT         | <a href="#">protein polymerization</a>                                     | RT |  |  |  | 5     | 8.1E-1  | 1.0EO     |  |
| <input type="checkbox"/> | PIR_SUPERFAMILY       | PIRSF002306: tubulin                                                       | RT |  |  |  | 4     | 8.6E-1  | 1.0EO     |  |
| <input type="checkbox"/> | INTERPRO              | <a href="#">Tubulin/FtsZ, 2-layer sandwich domain</a>                      | RT |  |  |  | 4     | 8.9E-1  | 1.0EO     |  |
| <input type="checkbox"/> | GOTERM_BP_FAT         | <a href="#">cellular protein complex assembly</a>                          | RT |  |  |  | 6     | 8.9E-1  | 1.0EO     |  |
| <input type="checkbox"/> | INTERPRO              | <a href="#">Beta tubulin, autoregulation binding site</a>                  | RT |  |  |  | 3     | 9.5E-1  | 1.0EO     |  |
| <input type="checkbox"/> | GOTERM_BP_FAT         | <a href="#">protein complex assembly</a>                                   | RT |  |  |  | 6     | 9.6E-1  | 1.0EO     |  |
| <input type="checkbox"/> | GOTERM_BP_FAT         | <a href="#">protein complex biogenesis</a>                                 | RT |  |  |  | 6     | 9.6E-1  | 1.0EO     |  |
|                          | Annotation Cluster 58 | Enrichment Score: 0.07                                                     |    |  |  |  | Count | P_Value | Benjamini |  |
| <input type="checkbox"/> | SP_PIR_KEYWORDS       | <a href="#">Protease</a>                                                   | RT |  |  |  | 21    | 7.0E-1  | 9.9E-1    |  |
| <input type="checkbox"/> | INTERPRO              | <a href="#">Peptidase, cysteine peptidase active site</a>                  | RT |  |  |  | 17    | 7.7E-1  | 1.0EO     |  |
| <input type="checkbox"/> | INTERPRO              | <a href="#">Peptidase C1A, papain</a>                                      | RT |  |  |  | 15    | 8.1E-1  | 1.0EO     |  |
| <input type="checkbox"/> | INTERPRO              | <a href="#">Peptidase C1A, papain C-terminal</a>                           | RT |  |  |  | 15    | 8.1E-1  | 1.0EO     |  |
| <input type="checkbox"/> | SMART                 | <a href="#">Pept_C1</a>                                                    | RT |  |  |  | 15    | 8.2E-1  | 1.0EO     |  |
| <input type="checkbox"/> | GOTERM_MF_FAT         | <a href="#">cysteine-type endopeptidase activity</a>                       | RT |  |  |  | 13    | 8.7E-1  | 1.0EO     |  |
| <input type="checkbox"/> | GOTERM_MF_FAT         | <a href="#">cysteine-type peptidase activity</a>                           | RT |  |  |  | 16    | 8.9E-1  | 1.0EO     |  |
| <input type="checkbox"/> | GOTERM_MF_FAT         | <a href="#">peptidase activity</a>                                         | RT |  |  |  | 43    | 8.9E-1  | 1.0EO     |  |
| <input type="checkbox"/> | GOTERM_MF_FAT         | <a href="#">peptidase activity, acting on L-amino acid peptides</a>        | RT |  |  |  | 35    | 9.6E-1  | 1.0EO     |  |
| <input type="checkbox"/> | GOTERM_MF_FAT         | <a href="#">endopeptidase activity</a>                                     | RT |  |  |  | 23    | 9.6E-1  | 1.0EO     |  |
|                          | Annotation Cluster 59 | Enrichment Score: 0.07                                                     |    |  |  |  | Count | P_Value | Benjamini |  |
| <input type="checkbox"/> | GOTERM_BP_FAT         | <a href="#">pyruvate metabolic process</a>                                 | RT |  |  |  | 3     | 8.1E-1  | 1.0EO     |  |
| <input type="checkbox"/> | GOTERM_BP_FAT         | <a href="#">gluconeogenesis</a>                                            | RT |  |  |  | 3     | 8.1E-1  | 1.0EO     |  |
| <input type="checkbox"/> | GOTERM_BP_FAT         | <a href="#">monosaccharide biosynthetic process</a>                        | RT |  |  |  | 3     | 8.1E-1  | 1.0EO     |  |
| <input type="checkbox"/> | GOTERM_BP_FAT         | <a href="#">hexose biosynthetic process</a>                                | RT |  |  |  | 3     | 8.1E-1  | 1.0EO     |  |
| <input type="checkbox"/> | GOTERM_BP_FAT         | <a href="#">cellular carbohydrate biosynthetic process</a>                 | RT |  |  |  | 4     | 8.9E-1  | 1.0EO     |  |
| <input type="checkbox"/> | GOTERM_BP_FAT         | <a href="#">carbohydrate biosynthetic process</a>                          | RT |  |  |  | 4     | 8.9E-1  | 1.0EO     |  |
| <input type="checkbox"/> | GOTERM_BP_FAT         | <a href="#">alcohol biosynthetic process</a>                               | RT |  |  |  | 3     | 9.1E-1  | 1.0EO     |  |
|                          | Annotation Cluster 60 | Enrichment Score: 0.07                                                     |    |  |  |  | Count | P_Value | Benjamini |  |
| <input type="checkbox"/> | GOTERM_MF_FAT         | <a href="#">carbon-nitrogen lyase activity</a>                             | RT |  |  |  | 3     | 8.1E-1  | 1.0EO     |  |
| <input type="checkbox"/> | GOTERM_MF_FAT         | <a href="#">ammonia-lyase activity</a>                                     | RT |  |  |  | 3     | 8.1E-1  | 1.0EO     |  |
| <input type="checkbox"/> | SP_PIR_KEYWORDS       | <a href="#">lyase</a>                                                      | RT |  |  |  | 9     | 9.2E-1  | 1.0EO     |  |
|                          | Annotation Cluster 61 | Enrichment Score: 0.07                                                     |    |  |  |  | Count | P_Value | Benjamini |  |
| <input type="checkbox"/> | GOTERM_MF_FAT         | <a href="#">DNA-directed DNA polymerase activity</a>                       | RT |  |  |  | 7     | 6.1E-1  | 1.0EO     |  |
| <input type="checkbox"/> | INTERPRO              | <a href="#">DNA-directed DNA polymerase, family B</a>                      | RT |  |  |  | 3     | 9.0E-1  | 1.0EO     |  |
| <input type="checkbox"/> | SP_PIR_KEYWORDS       | <a href="#">dna-directed dna polymerase</a>                                | RT |  |  |  | 3     | 9.0E-1  | 1.0EO     |  |
| <input type="checkbox"/> | SMART                 | <a href="#">POLBc</a>                                                      | RT |  |  |  | 3     | 9.0E-1  | 1.0EO     |  |
| <input type="checkbox"/> | SP_PIR_KEYWORDS       | <a href="#">dna replication</a>                                            | RT |  |  |  | 4     | 9.8E-1  | 1.0EO     |  |
|                          | Annotation Cluster 62 | Enrichment Score: 0.07                                                     |    |  |  |  | Count | P_Value | Benjamini |  |
| <input type="checkbox"/> | GOTERM_MF_FAT         | <a href="#">metal cluster binding</a>                                      | RT |  |  |  | 12    | 7.3E-1  | 1.0EO     |  |
| <input type="checkbox"/> | GOTERM_MF_FAT         | <a href="#">iron-sulfur cluster binding</a>                                | RT |  |  |  | 12    | 7.3E-1  | 1.0EO     |  |
| <input type="checkbox"/> | GOTERM_MF_FAT         | <a href="#">4 iron, 4 sulfur cluster binding</a>                           | RT |  |  |  | 5     | 8.1E-1  | 1.0EO     |  |
| <input type="checkbox"/> | INTERPRO              | <a href="#">4Fe-4S ferredoxin, iron-sulphur binding, subgroup</a>          | RT |  |  |  | 4     | 9.7E-1  | 1.0EO     |  |

| <input type="checkbox"/> | Annotation Cluster    | Enrichment Score       | Term                                                                         | RT | Count | P_Value | Benjamini |
|--------------------------|-----------------------|------------------------|------------------------------------------------------------------------------|----|-------|---------|-----------|
| <input type="checkbox"/> | INTERPRO              |                        | <a href="#">4Fe-4S ferredoxin, iron-sulphur binding domain</a>               | RT | 4     | 9.7E-1  | 1.0E0     |
| <input type="checkbox"/> | INTERPRO              |                        | <a href="#">4Fe-4S ferredoxin, iron-sulphur binding, conserved site</a>      | RT | 3     | 9.8E-1  | 1.0E0     |
|                          | Annotation Cluster 63 | Enrichment Score: 0.07 |                                                                              |    |       |         |           |
| <input type="checkbox"/> | GOTERM_BP_FAT         |                        | <a href="#">protein amino acid dephosphorylation</a>                         | RT | 8     | 7.5E-1  | 1.0E0     |
| <input type="checkbox"/> | INTERPRO              |                        | <a href="#">Protein-tyrosine phosphatase, active site</a>                    | RT | 4     | 7.9E-1  | 1.0E0     |
| <input type="checkbox"/> | INTERPRO              |                        | <a href="#">Dual-specific/protein-tyrosine phosphatase, conserved region</a> | RT | 3     | 9.0E-1  | 1.0E0     |
| <input type="checkbox"/> | INTERPRO              |                        | <a href="#">Protein-tyrosine phosphatase</a>                                 | RT | 3     | 9.0E-1  | 1.0E0     |
| <input type="checkbox"/> | GOTERM_MF_FAT         |                        | <a href="#">protein tyrosine phosphatase activity</a>                        | RT | 3     | 9.8E-1  | 1.0E0     |
|                          | Annotation Cluster 64 | Enrichment Score: 0.07 |                                                                              |    |       |         |           |
| <input type="checkbox"/> | GOTERM_BP_FAT         |                        | <a href="#">protein amino acid dephosphorylation</a>                         | RT | 8     | 7.5E-1  | 1.0E0     |
| <input type="checkbox"/> | INTERPRO              |                        | <a href="#">Dual specificity phosphatase, catalytic domain</a>               | RT | 3     | 9.0E-1  | 1.0E0     |
| <input type="checkbox"/> | INTERPRO              |                        | <a href="#">Protein-tyrosine phosphatase, dual specificity</a>               | RT | 3     | 9.0E-1  | 1.0E0     |
| <input type="checkbox"/> | GOTERM_MF_FAT         |                        | <a href="#">protein tyrosine/serine/threonine phosphatase activity</a>       | RT | 3     | 9.1E-1  | 1.0E0     |
|                          | Annotation Cluster 65 | Enrichment Score: 0.06 |                                                                              |    |       |         |           |
| <input type="checkbox"/> | INTERPRO              |                        | <a href="#">WD40 repeat, conserved site</a>                                  | RT | 19    | 4.1E-1  | 1.0E0     |
| <input type="checkbox"/> | SP_PIR_KEYWORDS       |                        | <a href="#">wd repeat</a>                                                    | RT | 25    | 9.3E-1  | 1.0E0     |
| <input type="checkbox"/> | INTERPRO              |                        | <a href="#">WD40 repeat 2</a>                                                | RT | 21    | 9.6E-1  | 1.0E0     |
| <input type="checkbox"/> | INTERPRO              |                        | <a href="#">WD40 repeat, region</a>                                          | RT | 23    | 9.6E-1  | 1.0E0     |
| <input type="checkbox"/> | INTERPRO              |                        | <a href="#">WD40 repeat, subgroup</a>                                        | RT | 27    | 9.7E-1  | 1.0E0     |
| <input type="checkbox"/> | INTERPRO              |                        | <a href="#">WD40 repeat</a>                                                  | RT | 36    | 9.8E-1  | 1.0E0     |
| <input type="checkbox"/> | SMART                 |                        | <a href="#">WD40</a>                                                         | RT | 36    | 9.8E-1  | 1.0E0     |
| <input type="checkbox"/> | INTERPRO              |                        | <a href="#">WD40/YVTN repeat-like</a>                                        | RT | 34    | 9.9E-1  | 1.0E0     |
|                          | Annotation Cluster 66 | Enrichment Score: 0.05 |                                                                              |    |       |         |           |
| <input type="checkbox"/> | INTERPRO              |                        | <a href="#">AMP-dependent synthetase and ligase</a>                          | RT | 4     | 8.9E-1  | 1.0E0     |
| <input type="checkbox"/> | COG_ONTOLOGY          |                        | <a href="#">Lipid metabolism</a>                                             | RT | 7     | 8.9E-1  | 1.0E0     |
| <input type="checkbox"/> | GOTERM_MF_FAT         |                        | <a href="#">fatty-acid ligase activity</a>                                   | RT | 3     | 9.1E-1  | 1.0E0     |
| <input type="checkbox"/> | GOTERM_MF_FAT         |                        | <a href="#">long-chain-fatty-acid-CoA ligase activity</a>                    | RT | 3     | 9.1E-1  | 1.0E0     |
| <input type="checkbox"/> | GOTERM_MF_FAT         |                        | <a href="#">ligase activity, forming carbon-sulfur bonds</a>                 | RT | 3     | 9.1E-1  | 1.0E0     |
|                          | Annotation Cluster 67 | Enrichment Score: 0.04 |                                                                              |    |       |         |           |
| <input type="checkbox"/> | GOTERM_CC_FAT         |                        | <a href="#">nuclear envelope</a>                                             | RT | 3     | 9.0E-1  | 1.0E0     |
| <input type="checkbox"/> | GOTERM_CC_FAT         |                        | <a href="#">pore complex</a>                                                 | RT | 3     | 9.0E-1  | 1.0E0     |
| <input type="checkbox"/> | GOTERM_CC_FAT         |                        | <a href="#">nuclear pore</a>                                                 | RT | 3     | 9.0E-1  | 1.0E0     |
| <input type="checkbox"/> | GOTERM_CC_FAT         |                        | <a href="#">envelope</a>                                                     | RT | 3     | 9.0E-1  | 1.0E0     |
| <input type="checkbox"/> | GOTERM_CC_FAT         |                        | <a href="#">organelle envelope</a>                                           | RT | 3     | 9.0E-1  | 1.0E0     |
|                          | Annotation Cluster 68 | Enrichment Score: 0.04 |                                                                              |    |       |         |           |
| <input type="checkbox"/> | GOTERM_CC_FAT         |                        | <a href="#">organelle lumen</a>                                              | RT | 3     | 9.0E-1  | 1.0E0     |
| <input type="checkbox"/> | GOTERM_CC_FAT         |                        | <a href="#">intracellular organelle lumen</a>                                | RT | 3     | 9.0E-1  | 1.0E0     |
| <input type="checkbox"/> | GOTERM_CC_FAT         |                        | <a href="#">nuclear lumen</a>                                                | RT | 3     | 9.0E-1  | 1.0E0     |
| <input type="checkbox"/> | GOTERM_CC_FAT         |                        | <a href="#">membrane-enclosed lumen</a>                                      | RT | 3     | 9.0E-1  | 1.0E0     |
|                          | Annotation Cluster 69 | Enrichment Score: 0.04 |                                                                              |    |       |         |           |
| <input type="checkbox"/> | KEGG_PATHWAY          |                        | <a href="#">Nucleotide excision repair</a>                                   | RT | 8     | 8.6E-1  | 1.0E0     |
| <input type="checkbox"/> | KEGG_PATHWAY          |                        | <a href="#">Mismatch repair</a>                                              | RT | 6     | 9.5E-1  | 1.0E0     |
| <input type="checkbox"/> | KEGG_PATHWAY          |                        | <a href="#">DNA replication</a>                                              | RT | 9     | 9.6E-1  | 1.0E0     |
|                          | Annotation Cluster 70 | Enrichment Score: 0.03 |                                                                              |    |       |         |           |
| <input type="checkbox"/> | INTERPRO              |                        | <a href="#">Kelch-type beta propeller</a>                                    | RT | 4     | 8.9E-1  | 1.0E0     |
| <input type="checkbox"/> | INTERPRO              |                        | <a href="#">Kelch repeat type 1</a>                                          | RT | 3     | 9.5E-1  | 1.0E0     |
| <input type="checkbox"/> | SMART                 |                        | <a href="#">Kelch</a>                                                        | RT | 3     | 9.5E-1  | 1.0E0     |
|                          | Annotation Cluster 71 | Enrichment Score: 0.02 |                                                                              |    |       |         |           |
| <input type="checkbox"/> | INTERPRO              |                        | <a href="#">Heat shock protein DnaJ, N-terminal</a>                          | RT | 4     | 9.4E-1  | 1.0E0     |
| <input type="checkbox"/> | SMART                 |                        | <a href="#">DnaJ</a>                                                         | RT | 4     | 9.4E-1  | 1.0E0     |
| <input type="checkbox"/> | GOTERM_MF_FAT         |                        | <a href="#">heat shock protein binding</a>                                   | RT | 4     | 9.5E-1  | 1.0E0     |
| <input type="checkbox"/> | INTERPRO              |                        | <a href="#">Molecular chaperone, heat shock protein, Hsp40, DnaJ</a>         | RT | 3     | 9.8E-1  | 1.0E0     |
|                          | Annotation Cluster 72 | Enrichment Score: 0.02 |                                                                              |    |       |         |           |
| <input type="checkbox"/> | INTERPRO              |                        | <a href="#">DNA-dependent ATPase MCM</a>                                     | RT | 3     | 9.5E-1  | 1.0E0     |
| <input type="checkbox"/> | SMART                 |                        | <a href="#">MCM</a>                                                          | RT | 3     | 9.5E-1  | 1.0E0     |
| <input type="checkbox"/> | KEGG_PATHWAY          |                        | <a href="#">DNA replication</a>                                              | RT | 9     | 9.6E-1  | 1.0E0     |
|                          | Annotation Cluster 73 | Enrichment Score: 0.02 |                                                                              |    |       |         |           |
| <input type="checkbox"/> | GOTERM_MF_FAT         |                        | <a href="#">N-acyltransferase activity</a>                                   | RT | 5     | 9.4E-1  | 1.0E0     |

| <input type="checkbox"/> |                       |                                                                                                       |    |  |  |       |         |           |  |
|--------------------------|-----------------------|-------------------------------------------------------------------------------------------------------|----|--|--|-------|---------|-----------|--|
| <input type="checkbox"/> | GOTERM_MF_FAT         | <a href="#">acetyltransferase activity</a>                                                            | RT |  |  | 5     | 9.4E-1  | 1.0E0     |  |
| <input type="checkbox"/> | INTERPRO              | <a href="#">GCN5-related N-acetyltransferase</a>                                                      | RT |  |  | 4     | 9.7E-1  | 1.0E0     |  |
| <input type="checkbox"/> | GOTERM_MF_FAT         | <a href="#">N-acetyltransferase activity</a>                                                          | RT |  |  | 4     | 9.7E-1  | 1.0E0     |  |
|                          | Annotation Cluster 74 | Enrichment Score: 0.02                                                                                |    |  |  | Count | P_Value | Benjamini |  |
| <input type="checkbox"/> | GOTERM_BP_FAT         | <a href="#">monosaccharide metabolic process</a>                                                      | RT |  |  | 12    | 9.1E-1  | 1.0E0     |  |
| <input type="checkbox"/> | GOTERM_BP_FAT         | <a href="#">glucose metabolic process</a>                                                             | RT |  |  | 10    | 9.3E-1  | 1.0E0     |  |
| <input type="checkbox"/> | GOTERM_BP_FAT         | <a href="#">hexose metabolic process</a>                                                              | RT |  |  | 10    | 9.3E-1  | 1.0E0     |  |
| <input type="checkbox"/> | SP_PIR_KEYWORDS       | <a href="#">glycolysis</a>                                                                            | RT |  |  | 3     | 9.5E-1  | 1.0E0     |  |
| <input type="checkbox"/> | GOTERM_BP_FAT         | <a href="#">glycolysis</a>                                                                            | RT |  |  | 5     | 9.7E-1  | 1.0E0     |  |
| <input type="checkbox"/> | GOTERM_BP_FAT         | <a href="#">generation of precursor metabolites and energy</a>                                        | RT |  |  | 12    | 9.7E-1  | 1.0E0     |  |
| <input type="checkbox"/> | GOTERM_BP_FAT         | <a href="#">monosaccharide catabolic process</a>                                                      | RT |  |  | 6     | 9.8E-1  | 1.0E0     |  |
| <input type="checkbox"/> | GOTERM_BP_FAT         | <a href="#">alcohol catabolic process</a>                                                             | RT |  |  | 6     | 9.8E-1  | 1.0E0     |  |
| <input type="checkbox"/> | GOTERM_BP_FAT         | <a href="#">cellular carbohydrate catabolic process</a>                                               | RT |  |  | 6     | 9.8E-1  | 1.0E0     |  |
| <input type="checkbox"/> | GOTERM_BP_FAT         | <a href="#">glucose catabolic process</a>                                                             | RT |  |  | 6     | 9.8E-1  | 1.0E0     |  |
| <input type="checkbox"/> | GOTERM_BP_FAT         | <a href="#">carbohydrate catabolic process</a>                                                        | RT |  |  | 6     | 9.8E-1  | 1.0E0     |  |
| <input type="checkbox"/> | GOTERM_BP_FAT         | <a href="#">hexose catabolic process</a>                                                              | RT |  |  | 6     | 9.8E-1  | 1.0E0     |  |
|                          | Annotation Cluster 75 | Enrichment Score: 0.01                                                                                |    |  |  | Count | P_Value | Benjamini |  |
| <input type="checkbox"/> | GOTERM_CC_FAT         | <a href="#">proton-transporting two-sector ATPase complex, proton-transporting domain</a>             | RT |  |  | 4     | 8.1E-1  | 1.0E0     |  |
| <input type="checkbox"/> | GOTERM_BP_FAT         | <a href="#">transmembrane transport</a>                                                               | RT |  |  | 11    | 9.0E-1  | 1.0E0     |  |
| <input type="checkbox"/> | GOTERM_CC_FAT         | <a href="#">proton-transporting V-type ATPase, V0 domain</a>                                          | RT |  |  | 3     | 9.0E-1  | 1.0E0     |  |
| <input type="checkbox"/> | KEGG_PATHWAY          | <a href="#">Oxidative phosphorylation</a>                                                             | RT |  |  | 6     | 9.2E-1  | 1.0E0     |  |
| <input type="checkbox"/> | GOTERM_BP_FAT         | <a href="#">ion transmembrane transport</a>                                                           | RT |  |  | 7     | 9.3E-1  | 1.0E0     |  |
| <input type="checkbox"/> | GOTERM_MF_FAT         | <a href="#">inorganic cation transmembrane transporter activity</a>                                   | RT |  |  | 9     | 9.3E-1  | 1.0E0     |  |
| <input type="checkbox"/> | GOTERM_BP_FAT         | <a href="#">hydrogen transport</a>                                                                    | RT |  |  | 7     | 9.6E-1  | 1.0E0     |  |
| <input type="checkbox"/> | GOTERM_BP_FAT         | <a href="#">proton transport</a>                                                                      | RT |  |  | 7     | 9.6E-1  | 1.0E0     |  |
| <input type="checkbox"/> | GOTERM_CC_FAT         | <a href="#">proton-transporting two-sector ATPase complex</a>                                         | RT |  |  | 7     | 9.6E-1  | 1.0E0     |  |
| <input type="checkbox"/> | INTERPRO              | <a href="#">ATPase, P-type, ATPase-associated region</a>                                              | RT |  |  | 5     | 9.6E-1  | 1.0E0     |  |
| <input type="checkbox"/> | GOTERM_MF_FAT         | <a href="#">hydrogen ion transmembrane transporter activity</a>                                       | RT |  |  | 7     | 9.6E-1  | 1.0E0     |  |
| <input type="checkbox"/> | GOTERM_MF_FAT         | <a href="#">monovalent inorganic cation transmembrane transporter activity</a>                        | RT |  |  | 7     | 9.6E-1  | 1.0E0     |  |
| <input type="checkbox"/> | GOTERM_BP_FAT         | <a href="#">oxidative phosphorylation</a>                                                             | RT |  |  | 6     | 9.6E-1  | 1.0E0     |  |
| <input type="checkbox"/> | GOTERM_BP_FAT         | <a href="#">energy coupled proton transport, down electrochemical gradient</a>                        | RT |  |  | 6     | 9.6E-1  | 1.0E0     |  |
| <input type="checkbox"/> | GOTERM_BP_FAT         | <a href="#">ATP synthesis coupled proton transport</a>                                                | RT |  |  | 6     | 9.6E-1  | 1.0E0     |  |
| <input type="checkbox"/> | GOTERM_CC_FAT         | <a href="#">proton-transporting V-type ATPase complex</a>                                             | RT |  |  | 4     | 9.7E-1  | 1.0E0     |  |
| <input type="checkbox"/> | GOTERM_BP_FAT         | <a href="#">generation of precursor metabolites and energy</a>                                        | RT |  |  | 12    | 9.7E-1  | 1.0E0     |  |
| <input type="checkbox"/> | GOTERM_BP_FAT         | <a href="#">ion transport</a>                                                                         | RT |  |  | 11    | 9.7E-1  | 1.0E0     |  |
| <input type="checkbox"/> | GOTERM_BP_FAT         | <a href="#">cation transport</a>                                                                      | RT |  |  | 11    | 9.7E-1  | 1.0E0     |  |
| <input type="checkbox"/> | GOTERM_BP_FAT         | <a href="#">monovalent inorganic cation transport</a>                                                 | RT |  |  | 7     | 9.8E-1  | 1.0E0     |  |
| <input type="checkbox"/> | INTERPRO              | <a href="#">ATPase, P-type, K/Mg/Cd/Cu/Zn/Na/Ca/Na/H-transporter</a>                                  | RT |  |  | 5     | 9.8E-1  | 1.0E0     |  |
| <input type="checkbox"/> | GOTERM_MF_FAT         | <a href="#">proton-transporting ATPase activity, rotational mechanism</a>                             | RT |  |  | 3     | 9.8E-1  | 1.0E0     |  |
| <input type="checkbox"/> | GOTERM_MF_FAT         | <a href="#">ATPase activity, coupled to transmembrane movement of ions, phosphorylative mechanism</a> | RT |  |  | 5     | 9.8E-1  | 1.0E0     |  |
| <input type="checkbox"/> | GOTERM_BP_FAT         | <a href="#">ATP metabolic process</a>                                                                 | RT |  |  | 11    | 9.8E-1  | 1.0E0     |  |
| <input type="checkbox"/> | GOTERM_BP_FAT         | <a href="#">ATP biosynthetic process</a>                                                              | RT |  |  | 11    | 9.8E-1  | 1.0E0     |  |
| <input type="checkbox"/> | GOTERM_BP_FAT         | <a href="#">nitrogen compound biosynthetic process</a>                                                | RT |  |  | 23    | 9.9E-1  | 1.0E0     |  |
| <input type="checkbox"/> | GOTERM_MF_FAT         | <a href="#">cation-transporting ATPase activity</a>                                                   | RT |  |  | 4     | 9.9E-1  | 1.0E0     |  |
| <input type="checkbox"/> | GOTERM_BP_FAT         | <a href="#">nucleobase, nucleoside and nucleotide biosynthetic process</a>                            | RT |  |  | 19    | 9.9E-1  | 1.0E0     |  |
| <input type="checkbox"/> | GOTERM_BP_FAT         | <a href="#">nucleobase, nucleoside, nucleotide and nucleic acid biosynthetic process</a>              | RT |  |  | 19    | 9.9E-1  | 1.0E0     |  |
| <input type="checkbox"/> | GOTERM_BP_FAT         | <a href="#">purine ribonucleotide biosynthetic process</a>                                            | RT |  |  | 12    | 9.9E-1  | 1.0E0     |  |
| <input type="checkbox"/> | GOTERM_BP_FAT         | <a href="#">purine ribonucleotide metabolic process</a>                                               | RT |  |  | 12    | 9.9E-1  | 1.0E0     |  |
| <input type="checkbox"/> | GOTERM_BP_FAT         | <a href="#">ribonucleotide biosynthetic process</a>                                                   | RT |  |  | 12    | 9.9E-1  | 1.0E0     |  |
| <input type="checkbox"/> | GOTERM_BP_FAT         | <a href="#">ribonucleotide metabolic process</a>                                                      | RT |  |  | 12    | 9.9E-1  | 1.0E0     |  |
| <input type="checkbox"/> | GOTERM_CC_FAT         | <a href="#">proton-transporting two-sector ATPase complex, catalytic domain</a>                       | RT |  |  | 3     | 9.9E-1  | 1.0E0     |  |
| <input type="checkbox"/> | GOTERM_MF_FAT         | <a href="#">ATPase activity, coupled to transmembrane movement of ions</a>                            | RT |  |  | 8     | 9.9E-1  | 1.0E0     |  |
| <input type="checkbox"/> | GOTERM_BP_FAT         | <a href="#">purine nucleotide biosynthetic process</a>                                                | RT |  |  | 12    | 9.9E-1  | 1.0E0     |  |

|                          |                 |                                                                                                                |    |  |    |        |       |
|--------------------------|-----------------|----------------------------------------------------------------------------------------------------------------|----|--|----|--------|-------|
| <input type="checkbox"/> | GOTERM_BP_FAT   | <a href="#">nucleoside triphosphate biosynthetic process</a>                                                   | RT |  | 11 | 9.9E-1 | 1.0EO |
| <input type="checkbox"/> | GOTERM_BP_FAT   | <a href="#">nucleoside triphosphate metabolic process</a>                                                      | RT |  | 11 | 9.9E-1 | 1.0EO |
| <input type="checkbox"/> | GOTERM_BP_FAT   | <a href="#">ribonucleoside triphosphate metabolic process</a>                                                  | RT |  | 11 | 9.9E-1 | 1.0EO |
| <input type="checkbox"/> | GOTERM_BP_FAT   | <a href="#">purine ribonucleoside triphosphate metabolic process</a>                                           | RT |  | 11 | 9.9E-1 | 1.0EO |
| <input type="checkbox"/> | GOTERM_BP_FAT   | <a href="#">ribonucleoside triphosphate biosynthetic process</a>                                               | RT |  | 11 | 9.9E-1 | 1.0EO |
| <input type="checkbox"/> | GOTERM_BP_FAT   | <a href="#">purine nucleoside triphosphate biosynthetic process</a>                                            | RT |  | 11 | 9.9E-1 | 1.0EO |
| <input type="checkbox"/> | GOTERM_BP_FAT   | <a href="#">purine nucleoside triphosphate metabolic process</a>                                               | RT |  | 11 | 9.9E-1 | 1.0EO |
| <input type="checkbox"/> | GOTERM_BP_FAT   | <a href="#">purine ribonucleoside triphosphate biosynthetic process</a>                                        | RT |  | 11 | 9.9E-1 | 1.0EO |
| <input type="checkbox"/> | GOTERM_BP_FAT   | <a href="#">purine nucleotide metabolic process</a>                                                            | RT |  | 12 | 1.0EO  | 1.0EO |
| <input type="checkbox"/> | GOTERM_MF_FAT   | <a href="#">ATPase activity, coupled to transmembrane movement of substances</a>                               | RT |  | 11 | 1.0EO  | 1.0EO |
| <input type="checkbox"/> | GOTERM_MF_FAT   | <a href="#">ATPase activity, coupled to movement of substances</a>                                             | RT |  | 11 | 1.0EO  | 1.0EO |
| <input type="checkbox"/> | GOTERM_BP_FAT   | <a href="#">nucleotide biosynthetic process</a>                                                                | RT |  | 16 | 1.0EO  | 1.0EO |
| <input type="checkbox"/> | GOTERM_MF_FAT   | <a href="#">P-P-bond-hydrolysis-driven transmembrane transporter activity</a>                                  | RT |  | 11 | 1.0EO  | 1.0EO |
| <input type="checkbox"/> | GOTERM_MF_FAT   | <a href="#">primary active transmembrane transporter activity</a>                                              | RT |  | 11 | 1.0EO  | 1.0EO |
| <input type="checkbox"/> | GOTERM_MF_FAT   | <a href="#">hydrolase activity, acting on acid anhydrides, catalyzing transmembrane movement of substances</a> | RT |  | 11 | 1.0EO  | 1.0EO |
| Annotation Cluster 76    |                 | Enrichment Score: 0.01                                                                                         |    |  |    |        |       |
| <input type="checkbox"/> | INTERPRO        | <a href="#">Tetratricopeptide region</a>                                                                       | RT |  | 11 | 9.7E-1 | 1.0EO |
| <input type="checkbox"/> | INTERPRO        | <a href="#">Tetratricopeptide repeat</a>                                                                       | RT |  | 11 | 9.7E-1 | 1.0EO |
| <input type="checkbox"/> | SP_PIR_KEYWORDS | <a href="#">tpr repeat</a>                                                                                     | RT |  | 4  | 9.7E-1 | 1.0EO |
| <input type="checkbox"/> | SMART           | <a href="#">TPR</a>                                                                                            | RT |  | 11 | 9.7E-1 | 1.0EO |
| <input type="checkbox"/> | INTERPRO        | <a href="#">Tetratricopeptide-like helical</a>                                                                 | RT |  | 14 | 9.8E-1 | 1.0EO |
| <input type="checkbox"/> | INTERPRO        | <a href="#">Tetratricopeptide TPR-1</a>                                                                        | RT |  | 8  | 9.9E-1 | 1.0EO |
| Annotation Cluster 77    |                 | Enrichment Score: 0.01                                                                                         |    |  |    |        |       |
| <input type="checkbox"/> | INTERPRO        | <a href="#">Dynein heavy chain, N-terminal region 2</a>                                                        | RT |  | 5  | 9.6E-1 | 1.0EO |
| <input type="checkbox"/> | INTERPRO        | <a href="#">Dynein heavy chain</a>                                                                             | RT |  | 5  | 9.8E-1 | 1.0EO |
| <input type="checkbox"/> | GOTERM_CC_FAT   | <a href="#">dynein complex</a>                                                                                 | RT |  | 5  | 9.8E-1 | 1.0EO |
| <input type="checkbox"/> | COG_ONTOLOGY    | <a href="#">Cytoskeleton</a>                                                                                   | RT |  | 8  | 1.0EO  | 1.0EO |
| <input type="checkbox"/> | GOTERM_CC_FAT   | <a href="#">microtubule associated complex</a>                                                                 | RT |  | 5  | 1.0EO  | 1.0EO |
| Annotation Cluster 78    |                 | Enrichment Score: 0.01                                                                                         |    |  |    |        |       |
| <input type="checkbox"/> | INTERPRO        | <a href="#">Chaperonin TCP-1, conserved site</a>                                                               | RT |  | 4  | 9.7E-1 | 1.0EO |
| <input type="checkbox"/> | PIR_SUPERFAMILY | PIRSF002584: molecular chaperone t-complex-type                                                                | RT |  | 3  | 9.8E-1 | 1.0EO |
| <input type="checkbox"/> | INTERPRO        | <a href="#">Chaperone, tailless complex polypeptide 1</a>                                                      | RT |  | 3  | 9.9E-1 | 1.0EO |
| <input type="checkbox"/> | SP_PIR_KEYWORDS | <a href="#">cytoplasm</a>                                                                                      | RT |  | 7  | 9.9E-1 | 1.0EO |
| <input type="checkbox"/> | INTERPRO        | <a href="#">Chaperonin Cpn60/TCP-1</a>                                                                         | RT |  | 3  | 9.9E-1 | 1.0EO |
| <input type="checkbox"/> | SP_PIR_KEYWORDS | <a href="#">Chaperone</a>                                                                                      | RT |  | 4  | 1.0EO  | 1.0EO |
| Annotation Cluster 79    |                 | Enrichment Score: 0                                                                                            |    |  |    |        |       |
| <input type="checkbox"/> | SP_PIR_KEYWORDS | <a href="#">Rotamase</a>                                                                                       | RT |  | 3  | 9.9E-1 | 1.0EO |
| <input type="checkbox"/> | GOTERM_MF_FAT   | <a href="#">cis-trans isomerase activity</a>                                                                   | RT |  | 3  | 9.9E-1 | 1.0EO |
| <input type="checkbox"/> | GOTERM_MF_FAT   | <a href="#">peptidyl-prolyl cis-trans isomerase activity</a>                                                   | RT |  | 3  | 9.9E-1 | 1.0EO |

192 terms were not clustered.

Please cite [Nature Protocols 2009; 4\(1\):44 & Genome Biology 2003; 4\(5\):P3](#) within any publication that makes use of any methods inspired by DAVID.

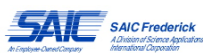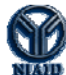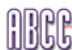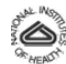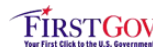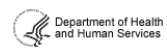

[Term of Service](#) | [Contact Us](#) | [Site Map](#)



## Functional Annotation Clustering

[Help and Manual](#)

Current Gene List: 3\_Random8

Current Background: Giardia intestinalis

3000 DAVID IDs

Options Classification Stringency Medium

Rerun using options

Create Sublist

75 Cluster(s)

[Download File](#)

|                          | Annotation Cluster 1           | Enrichment Score: 0.74                                                  |    |  | Count | P_Value | Benjamini |
|--------------------------|--------------------------------|-------------------------------------------------------------------------|----|--|-------|---------|-----------|
| <input type="checkbox"/> | INTERPRO                       | <a href="#">EF-HAND 1</a>                                               | RT |  | 17    | 3.6E-2  | 1.0E0     |
| <input type="checkbox"/> | SP_PIR_KEYWORDS                | <a href="#">calcium</a>                                                 | RT |  | 13    | 6.5E-2  | 1.0E0     |
| <input type="checkbox"/> | INTERPRO                       | <a href="#">EF-HAND 2</a>                                               | RT |  | 13    | 2.2E-1  | 1.0E0     |
| <input type="checkbox"/> | SMART                          | <a href="#">EFh</a>                                                     | RT |  | 9     | 2.4E-1  | 1.0E0     |
| <input type="checkbox"/> | INTERPRO                       | <a href="#">EF_hand</a>                                                 | RT |  | 9     | 2.6E-1  | 1.0E0     |
| <input type="checkbox"/> | INTERPRO                       | <a href="#">Calcium-binding EF-hand</a>                                 | RT |  | 9     | 2.6E-1  | 1.0E0     |
| <input type="checkbox"/> | INTERPRO                       | <a href="#">EF-Hand type</a>                                            | RT |  | 13    | 3.2E-1  | 1.0E0     |
| <input type="checkbox"/> | GOTERM_MF_FAT                  | <a href="#">calcium ion binding</a>                                     | RT |  | 27    | 4.5E-1  | 1.0E0     |
|                          | Annotation Cluster 2           | Enrichment Score: 0.67                                                  |    |  | Count | P_Value | Benjamini |
| <input type="checkbox"/> | GOTERM_BP_FAT                  | <a href="#">microtubule-based process</a>                               | RT |  | 38    | 7.9E-2  | 1.0E0     |
| <input type="checkbox"/> | GOTERM_CC_FAT                  | <a href="#">cytoskeletal part</a>                                       | RT |  | 35    | 1.0E-1  | 1.0E0     |
| <input type="checkbox"/> | GOTERM_CC_FAT                  | <a href="#">microtubule cytoskeleton</a>                                | RT |  | 35    | 1.0E-1  | 1.0E0     |
| <input type="checkbox"/> | GOTERM_CC_FAT                  | <a href="#">cytoskeleton</a>                                            | RT |  | 36    | 1.1E-1  | 1.0E0     |
| <input type="checkbox"/> | GOTERM_MF_FAT                  | <a href="#">motor activity</a>                                          | RT |  | 29    | 1.7E-1  | 1.0E0     |
| <input type="checkbox"/> | GOTERM_MF_FAT                  | <a href="#">microtubule motor activity</a>                              | RT |  | 29    | 1.7E-1  | 1.0E0     |
| <input type="checkbox"/> | GOTERM_BP_FAT                  | <a href="#">microtubule-based movement</a>                              | RT |  | 31    | 2.7E-1  | 1.0E0     |
| <input type="checkbox"/> | SMART                          | <a href="#">KISc</a>                                                    | RT |  | 19    | 3.0E-1  | 1.0E0     |
| <input type="checkbox"/> | INTERPRO                       | <a href="#">Kinesin_motor region</a>                                    | RT |  | 19    | 3.3E-1  | 1.0E0     |
| <input type="checkbox"/> | SP_PIR_KEYWORDS                | <a href="#">microtubule</a>                                             | RT |  | 21    | 3.6E-1  | 9.7E-1    |
| <input type="checkbox"/> | GOTERM_CC_FAT                  | <a href="#">microtubule</a>                                             | RT |  | 21    | 3.7E-1  | 1.0E0     |
| <input type="checkbox"/> | SP_PIR_KEYWORDS                | <a href="#">motor protein</a>                                           | RT |  | 16    | 4.0E-1  | 9.6E-1    |
| <input type="checkbox"/> | INTERPRO                       | <a href="#">Kinesin_motor region_conserved site</a>                     | RT |  | 12    | 5.0E-1  | 1.0E0     |
|                          | Annotation Cluster 3           | Enrichment Score: 0.51                                                  |    |  | Count | P_Value | Benjamini |
| <input type="checkbox"/> | GOTERM_BP_FAT                  | <a href="#">lipoprotein biosynthetic process</a>                        | RT |  | 5     | 3.1E-1  | 1.0E0     |
| <input type="checkbox"/> | GOTERM_BP_FAT                  | <a href="#">protein amino acid lipidation</a>                           | RT |  | 5     | 3.1E-1  | 1.0E0     |
| <input type="checkbox"/> | GOTERM_BP_FAT                  | <a href="#">lipoprotein metabolic process</a>                           | RT |  | 5     | 3.1E-1  | 1.0E0     |
|                          | Annotation Cluster 4           | Enrichment Score: 0.51                                                  |    |  | Count | P_Value | Benjamini |
| <input type="checkbox"/> | GOTERM_MF_FAT                  | <a href="#">pseudouridine synthase activity</a>                         | RT |  | 7     | 1.4E-1  | 1.0E0     |
| <input type="checkbox"/> | GOTERM_BP_FAT                  | <a href="#">pseudouridine synthesis</a>                                 | RT |  | 7     | 1.4E-1  | 1.0E0     |
| <input type="checkbox"/> | GOTERM_MF_FAT                  | <a href="#">intramolecular transferase activity</a>                     | RT |  | 9     | 2.6E-1  | 1.0E0     |
| <input type="checkbox"/> | GOTERM_BP_FAT                  | <a href="#">RNA modification</a>                                        | RT |  | 11    | 4.7E-1  | 1.0E0     |
| <input type="checkbox"/> | PIRSF001430:tRNA_psdUrid_synth |                                                                         | RT |  | 3     | 6.1E-1  | 1.0E0     |
| <input type="checkbox"/> | INTERPRO                       | <a href="#">Pseudouridine synthase I_TrUA</a>                           | RT |  | 3     | 6.2E-1  | 1.0E0     |
|                          | Annotation Cluster 5           | Enrichment Score: 0.45                                                  |    |  | Count | P_Value | Benjamini |
| <input type="checkbox"/> | GOTERM_MF_FAT                  | <a href="#">enzyme activator activity</a>                               | RT |  | 8     | 2.0E-1  | 1.0E0     |
| <input type="checkbox"/> | GOTERM_BP_FAT                  | <a href="#">regulation of Ras protein signal transduction</a>           | RT |  | 8     | 2.0E-1  | 1.0E0     |
| <input type="checkbox"/> | GOTERM_BP_FAT                  | <a href="#">regulation of small GTPase mediated signal transduction</a> | RT |  | 8     | 2.0E-1  | 1.0E0     |
| <input type="checkbox"/> | GOTERM_MF_FAT                  | <a href="#">GTPase regulator activity</a>                               | RT |  | 9     | 2.6E-1  | 1.0E0     |
| <input type="checkbox"/> | GOTERM_MF_FAT                  | <a href="#">small GTPase regulator activity</a>                         | RT |  | 9     | 2.6E-1  | 1.0E0     |
| <input type="checkbox"/> | GOTERM_BP_FAT                  | <a href="#">regulation of GTPase activity</a>                           | RT |  | 7     | 2.8E-1  | 1.0E0     |
| <input type="checkbox"/> | GOTERM_BP_FAT                  | <a href="#">regulation of hydrolase activity</a>                        | RT |  | 7     | 2.8E-1  | 1.0E0     |
| <input type="checkbox"/> | GOTERM_MF_FAT                  | <a href="#">nucleoside-triphosphatase regulator activity</a>            | RT |  | 10    | 3.1E-1  | 1.0E0     |
| <input type="checkbox"/> | GOTERM_MF_FAT                  | <a href="#">GTPase activator activity</a>                               | RT |  | 6     | 3.8E-1  | 1.0E0     |
| <input type="checkbox"/> | GOTERM_BP_FAT                  | <a href="#">regulation of Ras GTPase activity</a>                       | RT |  | 6     | 3.9E-1  | 1.0E0     |
| <input type="checkbox"/> | GOTERM_MF_FAT                  | <a href="#">Rab GTPase activator activity</a>                           | RT |  | 4     | 4.5E-1  | 1.0E0     |

| <input type="checkbox"/> | Annotation      | Term                                                              | RT | Bar | Count                  | P_Value | Benjamini |                         |
|--------------------------|-----------------|-------------------------------------------------------------------|----|-----|------------------------|---------|-----------|-------------------------|
| <input type="checkbox"/> | GOTERM_MF_FAT   | <a href="#">Ras GTPase activator activity</a>                     | RT |     | 4                      | 4.5E-1  | 1.0E0     |                         |
| <input type="checkbox"/> | GOTERM_BP_FAT   | <a href="#">regulation of Rab protein signal transduction</a>     | RT |     | 4                      | 4.5E-1  | 1.0E0     |                         |
| <input type="checkbox"/> | GOTERM_BP_FAT   | <a href="#">regulation of Rab GTPase activity</a>                 | RT |     | 4                      | 4.5E-1  | 1.0E0     |                         |
| <input type="checkbox"/> | SMART           | <a href="#">TBC</a>                                               | RT |     | 3                      | 6.1E-1  | 1.0E0     |                         |
| <input type="checkbox"/> | INTERPRO        | <a href="#">RabGAP/TBC</a>                                        | RT |     | 3                      | 6.2E-1  | 1.0E0     |                         |
| <input type="checkbox"/> | GOTERM_BP_FAT   | <a href="#">regulation of ARF protein signal transduction</a>     | RT |     | 4                      | 6.6E-1  | 1.0E0     |                         |
| Annotation Cluster 6     |                 |                                                                   |    |     | Enrichment Score: 0.39 |         |           | Count P_Value Benjamini |
| <input type="checkbox"/> | GOTERM_BP_FAT   | <a href="#">translational initiation</a>                          | RT |     | 9                      | 2.6E-1  | 1.0E0     |                         |
| <input type="checkbox"/> | GOTERM_MF_FAT   | <a href="#">translation initiation factor activity</a>            | RT |     | 17                     | 3.6E-1  | 1.0E0     |                         |
| <input type="checkbox"/> | GOTERM_MF_FAT   | <a href="#">translation factor activity, nucleic acid binding</a> | RT |     | 21                     | 3.9E-1  | 1.0E0     |                         |
| <input type="checkbox"/> | SP_PIR_KEYWORDS | <a href="#">Initiation factor</a>                                 | RT |     | 11                     | 7.6E-1  | 9.9E-1    |                         |
| Annotation Cluster 7     |                 |                                                                   |    |     | Enrichment Score: 0.38 |         |           | Count P_Value Benjamini |
| <input type="checkbox"/> | SMART           | <a href="#">CYCLIN</a>                                            | RT |     | 5                      | 3.0E-1  | 1.0E0     |                         |
| <input type="checkbox"/> | INTERPRO        | <a href="#">Cyclin</a>                                            | RT |     | 5                      | 3.1E-1  | 1.0E0     |                         |
| <input type="checkbox"/> | SP_PIR_KEYWORDS | <a href="#">cyclin</a>                                            | RT |     | 8                      | 3.3E-1  | 9.8E-1    |                         |
| <input type="checkbox"/> | INTERPRO        | <a href="#">Cyclin-related</a>                                    | RT |     | 5                      | 5.1E-1  | 1.0E0     |                         |
| <input type="checkbox"/> | INTERPRO        | <a href="#">Cyclin, N-terminal</a>                                | RT |     | 4                      | 8.0E-1  | 1.0E0     |                         |
| Annotation Cluster 8     |                 |                                                                   |    |     | Enrichment Score: 0.38 |         |           | Count P_Value Benjamini |
| <input type="checkbox"/> | SP_PIR_KEYWORDS | <a href="#">atp-binding</a>                                       | RT |     | 158                    | 1.2E-1  | 1.0E0     |                         |
| <input type="checkbox"/> | INTERPRO        | <a href="#">Protein kinase, ATP binding site</a>                  | RT |     | 54                     | 1.4E-1  | 1.0E0     |                         |
| <input type="checkbox"/> | INTERPRO        | <a href="#">Serine/threonine protein kinase, active site</a>      | RT |     | 58                     | 1.5E-1  | 1.0E0     |                         |
| <input type="checkbox"/> | SP_PIR_KEYWORDS | <a href="#">kinase</a>                                            | RT |     | 199                    | 1.7E-1  | 1.0E0     |                         |
| <input type="checkbox"/> | GOTERM_MF_FAT   | <a href="#">protein serine/threonine kinase activity</a>          | RT |     | 66                     | 2.2E-1  | 1.0E0     |                         |
| <input type="checkbox"/> | SP_PIR_KEYWORDS | <a href="#">nucleotide-binding</a>                                | RT |     | 162                    | 2.6E-1  | 9.9E-1    |                         |
| <input type="checkbox"/> | SMART           | <a href="#">S_TKc</a>                                             | RT |     | 37                     | 2.9E-1  | 1.0E0     |                         |
| <input type="checkbox"/> | INTERPRO        | <a href="#">Serine/threonine protein kinase-related</a>           | RT |     | 140                    | 3.2E-1  | 1.0E0     |                         |
| <input type="checkbox"/> | INTERPRO        | <a href="#">Serine/threonine protein kinase</a>                   | RT |     | 37                     | 3.2E-1  | 1.0E0     |                         |
| <input type="checkbox"/> | GOTERM_MF_FAT   | <a href="#">protein kinase activity</a>                           | RT |     | 161                    | 3.7E-1  | 1.0E0     |                         |
| <input type="checkbox"/> | SP_PIR_KEYWORDS | <a href="#">serine/threonine-protein kinase</a>                   | RT |     | 38                     | 3.8E-1  | 9.5E-1    |                         |
| <input type="checkbox"/> | INTERPRO        | <a href="#">Protein kinase, core</a>                              | RT |     | 158                    | 3.9E-1  | 1.0E0     |                         |
| <input type="checkbox"/> | GOTERM_BP_FAT   | <a href="#">protein amino acid phosphorylation</a>                | RT |     | 159                    | 4.1E-1  | 1.0E0     |                         |
| <input type="checkbox"/> | GOTERM_BP_FAT   | <a href="#">phosphorylation</a>                                   | RT |     | 170                    | 4.2E-1  | 1.0E0     |                         |
| <input type="checkbox"/> | GOTERM_BP_FAT   | <a href="#">phosphorus metabolic process</a>                      | RT |     | 175                    | 6.6E-1  | 1.0E0     |                         |
| <input type="checkbox"/> | GOTERM_BP_FAT   | <a href="#">phosphate metabolic process</a>                       | RT |     | 175                    | 6.6E-1  | 1.0E0     |                         |
| <input type="checkbox"/> | GOTERM_MF_FAT   | <a href="#">adenyl ribonucleotide binding</a>                     | RT |     | 301                    | 7.2E-1  | 1.0E0     |                         |
| <input type="checkbox"/> | GOTERM_MF_FAT   | <a href="#">ATP binding</a>                                       | RT |     | 301                    | 7.2E-1  | 1.0E0     |                         |
| <input type="checkbox"/> | GOTERM_MF_FAT   | <a href="#">purine nucleoside binding</a>                         | RT |     | 304                    | 7.6E-1  | 1.0E0     |                         |
| <input type="checkbox"/> | GOTERM_MF_FAT   | <a href="#">adenyl nucleotide binding</a>                         | RT |     | 304                    | 7.6E-1  | 1.0E0     |                         |
| <input type="checkbox"/> | GOTERM_MF_FAT   | <a href="#">nucleoside binding</a>                                | RT |     | 305                    | 8.0E-1  | 1.0E0     |                         |
| <input type="checkbox"/> | GOTERM_MF_FAT   | <a href="#">purine ribonucleotide binding</a>                     | RT |     | 325                    | 8.5E-1  | 1.0E0     |                         |
| <input type="checkbox"/> | GOTERM_MF_FAT   | <a href="#">ribonucleotide binding</a>                            | RT |     | 325                    | 8.5E-1  | 1.0E0     |                         |
| <input type="checkbox"/> | GOTERM_MF_FAT   | <a href="#">nucleotide binding</a>                                | RT |     | 349                    | 8.7E-1  | 1.0E0     |                         |
| <input type="checkbox"/> | GOTERM_MF_FAT   | <a href="#">purine nucleotide binding</a>                         | RT |     | 328                    | 8.7E-1  | 1.0E0     |                         |
| Annotation Cluster 9     |                 |                                                                   |    |     | Enrichment Score: 0.37 |         |           | Count P_Value Benjamini |
| <input type="checkbox"/> | SMART           | <a href="#">SET</a>                                               | RT |     | 6                      | 2.0E-1  | 1.0E0     |                         |
| <input type="checkbox"/> | INTERPRO        | <a href="#">SET</a>                                               | RT |     | 6                      | 2.1E-1  | 1.0E0     |                         |
| <input type="checkbox"/> | SMART           | <a href="#">PostSET</a>                                           | RT |     | 3                      | 6.1E-1  | 1.0E0     |                         |
| <input type="checkbox"/> | INTERPRO        | <a href="#">Post-SET zinc-binding region</a>                      | RT |     | 3                      | 6.2E-1  | 1.0E0     |                         |
| <input type="checkbox"/> | SP_PIR_KEYWORDS | <a href="#">methyltransferase</a>                                 | RT |     | 10                     | 9.5E-1  | 1.0E0     |                         |
| Annotation Cluster 10    |                 |                                                                   |    |     | Enrichment Score: 0.36 |         |           | Count P_Value Benjamini |
| <input type="checkbox"/> | SMART           | <a href="#">FU</a>                                                | RT |     | 111                    | 3.0E-1  | 1.0E0     |                         |
| <input type="checkbox"/> | INTERPRO        | <a href="#">Giardia variant-specific surface protein</a>          | RT |     | 142                    | 3.4E-1  | 1.0E0     |                         |
| <input type="checkbox"/> | INTERPRO        | <a href="#">Furin-like repeat</a>                                 | RT |     | 111                    | 3.6E-1  | 1.0E0     |                         |
| <input type="checkbox"/> | SMART           | <a href="#">EGF</a>                                               | RT |     | 109                    | 6.3E-1  | 1.0E0     |                         |
| <input type="checkbox"/> | INTERPRO        | <a href="#">EGF-like</a>                                          | RT |     | 109                    | 6.8E-1  | 1.0E0     |                         |
| Annotation Cluster 11    |                 |                                                                   |    |     | Enrichment Score: 0.36 |         |           | Count P_Value Benjamini |
| <input type="checkbox"/> | SP_PIR_KEYWORDS | <a href="#">egf-like domain</a>                                   | RT |     | 13                     | 2.1E-1  | 9.9E-1    |                         |
| <input type="checkbox"/> | INTERPRO        | <a href="#">EGF-like, type 3</a>                                  | RT |     | 20                     | 5.2E-1  | 1.0E0     |                         |

| <input type="checkbox"/> | Annotation Cluster    | Enrichment Score                                                                                      | RT |  | Count | P_Value | Benjamini |
|--------------------------|-----------------------|-------------------------------------------------------------------------------------------------------|----|--|-------|---------|-----------|
| <input type="checkbox"/> | INTERPRO              | <a href="#">EGF_extracellular</a>                                                                     | RT |  | 13    | 7.9E-1  | 1.0E0     |
| <input type="checkbox"/> | Annotation Cluster 12 | Enrichment Score: 0.36                                                                                |    |  |       |         |           |
| <input type="checkbox"/> | INTERPRO              | <a href="#">Alcohol dehydrogenase_iron-type</a>                                                       | RT |  | 5     | 3.1E-1  | 1.0E0     |
| <input type="checkbox"/> | COG_ONTOLOGY          | <a href="#">Energy production and conversion</a>                                                      | RT |  | 7     | 4.6E-1  | 1.0E0     |
| <input type="checkbox"/> | PIR_SUPERFAMILY       | PIRSF000113:iron-containing alcohol dehydrogenase                                                     | RT |  | 3     | 6.1E-1  | 1.0E0     |
| <input type="checkbox"/> | Annotation Cluster 13 | Enrichment Score: 0.33                                                                                |    |  |       |         |           |
| <input type="checkbox"/> | GOTERM_MF_FAT         | <a href="#">cofactor binding</a>                                                                      | RT |  | 24    | 2.4E-1  | 1.0E0     |
| <input type="checkbox"/> | GOTERM_MF_FAT         | <a href="#">vitamin binding</a>                                                                       | RT |  | 9     | 2.6E-1  | 1.0E0     |
| <input type="checkbox"/> | INTERPRO              | <a href="#">Aminotransferase_class I and II</a>                                                       | RT |  | 5     | 3.1E-1  | 1.0E0     |
| <input type="checkbox"/> | GOTERM_MF_FAT         | <a href="#">vitamin B6 binding</a>                                                                    | RT |  | 8     | 3.4E-1  | 1.0E0     |
| <input type="checkbox"/> | GOTERM_MF_FAT         | <a href="#">pyridoxal phosphate binding</a>                                                           | RT |  | 8     | 3.4E-1  | 1.0E0     |
| <input type="checkbox"/> | INTERPRO              | <a href="#">Pyridoxal phosphate-dependent transferase, major region, subdomain 1</a>                  | RT |  | 6     | 5.5E-1  | 1.0E0     |
| <input type="checkbox"/> | KEGG_PATHWAY          | <a href="#">Alanine, aspartate and glutamate metabolism</a>                                           | RT |  | 3     | 6.1E-1  | 1.0E0     |
| <input type="checkbox"/> | INTERPRO              | <a href="#">Pyridoxal phosphate-dependent transferase, major region, subdomain 2</a>                  | RT |  | 3     | 6.2E-1  | 1.0E0     |
| <input type="checkbox"/> | GOTERM_MF_FAT         | <a href="#">transferase activity, transferring nitrogenous groups</a>                                 | RT |  | 5     | 6.8E-1  | 1.0E0     |
| <input type="checkbox"/> | SP_PIR_KEYWORDS       | <a href="#">Aminotransferase</a>                                                                      | RT |  | 3     | 9.0E-1  | 9.9E-1    |
| <input type="checkbox"/> | GOTERM_MF_FAT         | <a href="#">transaminase activity</a>                                                                 | RT |  | 3     | 9.0E-1  | 1.0E0     |
| <input type="checkbox"/> | Annotation Cluster 14 | Enrichment Score: 0.32                                                                                |    |  |       |         |           |
| <input type="checkbox"/> | GOTERM_CC_FAT         | <a href="#">spindle</a>                                                                               | RT |  | 4     | 4.1E-1  | 1.0E0     |
| <input type="checkbox"/> | GOTERM_CC_FAT         | <a href="#">microtubule organizing center</a>                                                         | RT |  | 4     | 4.1E-1  | 1.0E0     |
| <input type="checkbox"/> | GOTERM_CC_FAT         | <a href="#">spindle pole</a>                                                                          | RT |  | 4     | 4.1E-1  | 1.0E0     |
| <input type="checkbox"/> | INTERPRO              | <a href="#">Spc97/Spc98</a>                                                                           | RT |  | 4     | 4.4E-1  | 1.0E0     |
| <input type="checkbox"/> | GOTERM_BP_FAT         | <a href="#">microtubule cytoskeleton organization</a>                                                 | RT |  | 4     | 4.5E-1  | 1.0E0     |
| <input type="checkbox"/> | GOTERM_BP_FAT         | <a href="#">cytoskeleton organization</a>                                                             | RT |  | 9     | 8.3E-1  | 1.0E0     |
| <input type="checkbox"/> | Annotation Cluster 15 | Enrichment Score: 0.31                                                                                |    |  |       |         |           |
| <input type="checkbox"/> | GOTERM_CC_FAT         | <a href="#">proton-transporting V-type ATPase complex</a>                                             | RT |  | 8     | 1.7E-1  | 1.0E0     |
| <input type="checkbox"/> | GOTERM_BP_FAT         | <a href="#">nitrogen compound biosynthetic process</a>                                                | RT |  | 33    | 2.0E-1  | 1.0E0     |
| <input type="checkbox"/> | GOTERM_BP_FAT         | <a href="#">purine nucleotide metabolic process</a>                                                   | RT |  | 21    | 2.3E-1  | 1.0E0     |
| <input type="checkbox"/> | INTERPRO              | <a href="#">ATPase, P-type, ATPase-associated region</a>                                              | RT |  | 9     | 2.6E-1  | 1.0E0     |
| <input type="checkbox"/> | GOTERM_CC_FAT         | <a href="#">proton-transporting V-type ATPase, V0 domain</a>                                          | RT |  | 5     | 2.8E-1  | 1.0E0     |
| <input type="checkbox"/> | GOTERM_BP_FAT         | <a href="#">purine nucleotide biosynthetic process</a>                                                | RT |  | 20    | 2.8E-1  | 1.0E0     |
| <input type="checkbox"/> | INTERPRO              | <a href="#">ATPase, P-type phosphorylation site</a>                                                   | RT |  | 7     | 2.8E-1  | 1.0E0     |
| <input type="checkbox"/> | GOTERM_BP_FAT         | <a href="#">purine ribonucleotide metabolic process</a>                                               | RT |  | 19    | 3.3E-1  | 1.0E0     |
| <input type="checkbox"/> | GOTERM_BP_FAT         | <a href="#">ribonucleotide metabolic process</a>                                                      | RT |  | 19    | 3.3E-1  | 1.0E0     |
| <input type="checkbox"/> | GOTERM_BP_FAT         | <a href="#">ribonucleotide biosynthetic process</a>                                                   | RT |  | 19    | 3.3E-1  | 1.0E0     |
| <input type="checkbox"/> | GOTERM_BP_FAT         | <a href="#">purine ribonucleotide biosynthetic process</a>                                            | RT |  | 19    | 3.3E-1  | 1.0E0     |
| <input type="checkbox"/> | GOTERM_BP_FAT         | <a href="#">ATP metabolic process</a>                                                                 | RT |  | 17    | 3.6E-1  | 1.0E0     |
| <input type="checkbox"/> | GOTERM_BP_FAT         | <a href="#">ATP biosynthetic process</a>                                                              | RT |  | 17    | 3.6E-1  | 1.0E0     |
| <input type="checkbox"/> | GOTERM_BP_FAT         | <a href="#">nucleobase, nucleoside and nucleotide biosynthetic process</a>                            | RT |  | 27    | 3.8E-1  | 1.0E0     |
| <input type="checkbox"/> | GOTERM_BP_FAT         | <a href="#">nucleobase, nucleoside, nucleotide and nucleic acid biosynthetic process</a>              | RT |  | 27    | 3.8E-1  | 1.0E0     |
| <input type="checkbox"/> | INTERPRO              | <a href="#">ATPase, P-type, K/Mg/Cd/Cu/Zn/Na/Ca/Na/H-transporter</a>                                  | RT |  | 9     | 3.9E-1  | 1.0E0     |
| <input type="checkbox"/> | GOTERM_BP_FAT         | <a href="#">purine nucleoside triphosphate metabolic process</a>                                      | RT |  | 18    | 3.9E-1  | 1.0E0     |
| <input type="checkbox"/> | GOTERM_BP_FAT         | <a href="#">nucleoside triphosphate biosynthetic process</a>                                          | RT |  | 18    | 3.9E-1  | 1.0E0     |
| <input type="checkbox"/> | GOTERM_BP_FAT         | <a href="#">purine nucleoside triphosphate biosynthetic process</a>                                   | RT |  | 18    | 3.9E-1  | 1.0E0     |
| <input type="checkbox"/> | GOTERM_BP_FAT         | <a href="#">nucleoside triphosphate metabolic process</a>                                             | RT |  | 18    | 3.9E-1  | 1.0E0     |
| <input type="checkbox"/> | GOTERM_BP_FAT         | <a href="#">purine ribonucleoside triphosphate metabolic process</a>                                  | RT |  | 18    | 3.9E-1  | 1.0E0     |
| <input type="checkbox"/> | GOTERM_BP_FAT         | <a href="#">purine ribonucleoside triphosphate biosynthetic process</a>                               | RT |  | 18    | 3.9E-1  | 1.0E0     |
| <input type="checkbox"/> | GOTERM_BP_FAT         | <a href="#">ribonucleoside triphosphate metabolic process</a>                                         | RT |  | 18    | 3.9E-1  | 1.0E0     |
| <input type="checkbox"/> | GOTERM_BP_FAT         | <a href="#">ribonucleoside triphosphate biosynthetic process</a>                                      | RT |  | 18    | 3.9E-1  | 1.0E0     |
| <input type="checkbox"/> | GOTERM_MF_FAT         | <a href="#">ATPase activity, coupled to transmembrane movement of ions, phosphorylative mechanism</a> | RT |  | 9     | 3.9E-1  | 1.0E0     |
| <input type="checkbox"/> | GOTERM_BP_FAT         | <a href="#">nucleotide biosynthetic process</a>                                                       | RT |  | 25    | 4.1E-1  | 1.0E0     |
| <input type="checkbox"/> | SP_PIR_KEYWORDS       | <a href="#">phosphoprotein</a>                                                                        | RT |  | 4     | 4.4E-1  | 9.6E-1    |
| <input type="checkbox"/> | GOTERM_BP_FAT         | <a href="#">generation of precursor metabolites and energy</a>                                        | RT |  | 17    | 4.5E-1  | 1.0E0     |



|                          |                 |                                                                                                                |    |  |       |         |           |
|--------------------------|-----------------|----------------------------------------------------------------------------------------------------------------|----|--|-------|---------|-----------|
| <input type="checkbox"/> | GOTERM_CC_FAT   | <a href="#">proton-transporting two-sector ATPase complex, proton-transporting domain</a>                      | RT |  | 5     | 4.7E-1  | 1.0E0     |
| <input type="checkbox"/> | GOTERM_CC_FAT   | <a href="#">proton-transporting two-sector ATPase complex</a>                                                  | RT |  | 10    | 5.0E-1  | 1.0E0     |
| <input type="checkbox"/> | GOTERM_MF_FAT   | <a href="#">ATPase activity, coupled to transmembrane movement of ions</a>                                     | RT |  | 13    | 5.4E-1  | 1.0E0     |
| <input type="checkbox"/> | GOTERM_BP_FAT   | <a href="#">hydrogen transport</a>                                                                             | RT |  | 10    | 5.6E-1  | 1.0E0     |
| <input type="checkbox"/> | GOTERM_BP_FAT   | <a href="#">proton transport</a>                                                                               | RT |  | 10    | 5.6E-1  | 1.0E0     |
| <input type="checkbox"/> | GOTERM_BP_FAT   | <a href="#">cation transport</a>                                                                               | RT |  | 15    | 5.9E-1  | 1.0E0     |
| <input type="checkbox"/> | GOTERM_BP_FAT   | <a href="#">ion transport</a>                                                                                  | RT |  | 15    | 5.9E-1  | 1.0E0     |
| <input type="checkbox"/> | PIR_SUPERFAMILY | PIRSF001292: vacuolar H(+)-transporting ATPase 16K chain                                                       | RT |  | 3     | 6.1E-1  | 1.0E0     |
| <input type="checkbox"/> | INTERPRO        | <a href="#">ATPase, P-type cation-transporter, C-terminal</a>                                                  | RT |  | 3     | 6.2E-1  | 1.0E0     |
| <input type="checkbox"/> | INTERPRO        | <a href="#">ATPase, VO complex, proteolipid subunit C</a>                                                      | RT |  | 3     | 6.2E-1  | 1.0E0     |
| <input type="checkbox"/> | INTERPRO        | <a href="#">ATPase, P-type cation-transporter, N-terminal</a>                                                  | RT |  | 3     | 6.2E-1  | 1.0E0     |
| <input type="checkbox"/> | INTERPRO        | <a href="#">ATPase, FO/VO complex, subunit C</a>                                                               | RT |  | 3     | 6.2E-1  | 1.0E0     |
| <input type="checkbox"/> | GOTERM_BP_FAT   | <a href="#">transmembrane transport</a>                                                                        | RT |  | 13    | 6.4E-1  | 1.0E0     |
| <input type="checkbox"/> | GOTERM_BP_FAT   | <a href="#">ion transmembrane transport</a>                                                                    | RT |  | 9     | 6.5E-1  | 1.0E0     |
| <input type="checkbox"/> | GOTERM_BP_FAT   | <a href="#">monovalent inorganic cation transport</a>                                                          | RT |  | 10    | 6.7E-1  | 1.0E0     |
| <input type="checkbox"/> | GOTERM_MF_FAT   | <a href="#">inorganic cation transmembrane transporter activity</a>                                            | RT |  | 11    | 6.9E-1  | 1.0E0     |
| <input type="checkbox"/> | KEGG_PATHWAY    | <a href="#">Oxidative phosphorylation</a>                                                                      | RT |  | 8     | 7.0E-1  | 1.0E0     |
| <input type="checkbox"/> | GOTERM_BP_FAT   | <a href="#">oxidative phosphorylation</a>                                                                      | RT |  | 8     | 7.3E-1  | 1.0E0     |
| <input type="checkbox"/> | GOTERM_BP_FAT   | <a href="#">energy coupled proton transport, down electrochemical gradient</a>                                 | RT |  | 8     | 7.3E-1  | 1.0E0     |
| <input type="checkbox"/> | GOTERM_BP_FAT   | <a href="#">ATP synthesis coupled proton transport</a>                                                         | RT |  | 8     | 7.3E-1  | 1.0E0     |
| <input type="checkbox"/> | GOTERM_MF_FAT   | <a href="#">hydrogen ion transmembrane transporter activity</a>                                                | RT |  | 9     | 7.5E-1  | 1.0E0     |
| <input type="checkbox"/> | GOTERM_MF_FAT   | <a href="#">monovalent inorganic cation transmembrane transporter activity</a>                                 | RT |  | 9     | 7.5E-1  | 1.0E0     |
| <input type="checkbox"/> | GOTERM_MF_FAT   | <a href="#">hydrolase activity, acting on acid anhydrides, catalyzing transmembrane movement of substances</a> | RT |  | 17    | 7.8E-1  | 1.0E0     |
| <input type="checkbox"/> | INTERPRO        | <a href="#">Haloacid dehalogenase-like hydrolase</a>                                                           | RT |  | 6     | 8.0E-1  | 1.0E0     |
| <input type="checkbox"/> | GOTERM_MF_FAT   | <a href="#">cation-transporting ATPase activity</a>                                                            | RT |  | 6     | 8.1E-1  | 1.0E0     |
| <input type="checkbox"/> | GOTERM_MF_FAT   | <a href="#">ATPase activity, coupled to movement of substances</a>                                             | RT |  | 15    | 8.6E-1  | 1.0E0     |
| <input type="checkbox"/> | GOTERM_MF_FAT   | <a href="#">ATPase activity, coupled to transmembrane movement of substances</a>                               | RT |  | 15    | 8.6E-1  | 1.0E0     |
| <input type="checkbox"/> | GOTERM_MF_FAT   | <a href="#">primary active transmembrane transporter activity</a>                                              | RT |  | 16    | 8.7E-1  | 1.0E0     |
| <input type="checkbox"/> | GOTERM_MF_FAT   | <a href="#">P-P-bond-hydrolysis-driven transmembrane transporter activity</a>                                  | RT |  | 16    | 8.7E-1  | 1.0E0     |
| <input type="checkbox"/> | GOTERM_CC_FAT   | <a href="#">proton-transporting two-sector ATPase complex, catalytic domain</a>                                | RT |  | 4     | 9.3E-1  | 1.0E0     |
| <input type="checkbox"/> | GOTERM_MF_FAT   | <a href="#">proton-transporting ATPase activity, rotational mechanism</a>                                      | RT |  | 3     | 9.8E-1  | 1.0E0     |
| Annotation Cluster 16    |                 | Enrichment Score: 0.29                                                                                         |    |  | Count | P_Value | Benjamini |
| <input type="checkbox"/> | GOTERM_BP_FAT   | <a href="#">alcohol catabolic process</a>                                                                      | RT |  | 10    | 4.4E-1  | 1.0E0     |
| <input type="checkbox"/> | GOTERM_BP_FAT   | <a href="#">glucose catabolic process</a>                                                                      | RT |  | 10    | 4.4E-1  | 1.0E0     |
| <input type="checkbox"/> | GOTERM_BP_FAT   | <a href="#">carbohydrate catabolic process</a>                                                                 | RT |  | 10    | 4.4E-1  | 1.0E0     |
| <input type="checkbox"/> | GOTERM_BP_FAT   | <a href="#">monosaccharide catabolic process</a>                                                               | RT |  | 10    | 4.4E-1  | 1.0E0     |
| <input type="checkbox"/> | GOTERM_BP_FAT   | <a href="#">hexose catabolic process</a>                                                                       | RT |  | 10    | 4.4E-1  | 1.0E0     |
| <input type="checkbox"/> | GOTERM_BP_FAT   | <a href="#">cellular carbohydrate catabolic process</a>                                                        | RT |  | 10    | 4.4E-1  | 1.0E0     |
| <input type="checkbox"/> | GOTERM_BP_FAT   | <a href="#">generation of precursor metabolites and energy</a>                                                 | RT |  | 17    | 4.5E-1  | 1.0E0     |
| <input type="checkbox"/> | GOTERM_BP_FAT   | <a href="#">glycolysis</a>                                                                                     | RT |  | 8     | 4.9E-1  | 1.0E0     |
| <input type="checkbox"/> | SP_PIR_KEYWORDS | <a href="#">glycolysis</a>                                                                                     | RT |  | 5     | 5.0E-1  | 9.6E-1    |
| <input type="checkbox"/> | GOTERM_BP_FAT   | <a href="#">monosaccharide metabolic process</a>                                                               | RT |  | 14    | 6.6E-1  | 1.0E0     |
| <input type="checkbox"/> | GOTERM_BP_FAT   | <a href="#">glucose metabolic process</a>                                                                      | RT |  | 11    | 8.4E-1  | 1.0E0     |
| <input type="checkbox"/> | GOTERM_BP_FAT   | <a href="#">hexose metabolic process</a>                                                                       | RT |  | 11    | 8.4E-1  | 1.0E0     |
| Annotation Cluster 17    |                 | Enrichment Score: 0.29                                                                                         |    |  | Count | P_Value | Benjamini |
| <input type="checkbox"/> | SMART           | <a href="#">Pept_C1</a>                                                                                        | RT |  | 18    | 3.6E-1  | 1.0E0     |
| <input type="checkbox"/> | GOTERM_MF_FAT   | <a href="#">peptidase activity</a>                                                                             | RT |  | 49    | 3.8E-1  | 1.0E0     |
| <input type="checkbox"/> | INTERPRO        | <a href="#">Peptidase C1A, papain C-terminal</a>                                                               | RT |  | 18    | 3.8E-1  | 1.0E0     |
| <input type="checkbox"/> | INTERPRO        | <a href="#">Peptidase C1A, papain</a>                                                                          | RT |  | 18    | 3.8E-1  | 1.0E0     |
| <input type="checkbox"/> | GOTERM_MF_FAT   | <a href="#">cysteine-type peptidase activity</a>                                                               | RT |  | 19    | 5.1E-1  | 1.0E0     |
| <input type="checkbox"/> | GOTERM_MF_FAT   | <a href="#">cysteine-type endopeptidase activity</a>                                                           | RT |  | 15    | 5.9E-1  | 1.0E0     |
| <input type="checkbox"/> | GOTERM_MF_FAT   | <a href="#">peptidase activity, acting on L-amino acid peptides</a>                                            | RT |  | 40    | 6.2E-1  | 1.0E0     |
| <input type="checkbox"/> | GOTERM_MF_FAT   | <a href="#">Peptidase, cysteine peptidase active site</a>                                                      | RT |  | 18    | 6.4E-1  | 1.0E0     |

| <input type="checkbox"/> | Category              | Term                                                                                                | RT | Bar | Count | P_Value | Benjamini |
|--------------------------|-----------------------|-----------------------------------------------------------------------------------------------------|----|-----|-------|---------|-----------|
| <input type="checkbox"/> | INTERPRO              |                                                                                                     |    |     |       |         |           |
| <input type="checkbox"/> | SP_PIR_KEYWORDS       | <a href="#">Protease</a>                                                                            | RT |     | 21    | 6.8E-1  | 9.8E-1    |
| <input type="checkbox"/> | GOTERM_MF_FAT         | <a href="#">endopeptidase activity</a>                                                              | RT |     | 25    | 8.5E-1  | 1.0E0     |
|                          | Annotation Cluster 18 | Enrichment Score: 0.28                                                                              |    |     | Count | P_Value | Benjamini |
| <input type="checkbox"/> | GOTERM_CC_FAT         | <a href="#">cytosolic part</a>                                                                      | RT |     | 7     | 3.9E-1  | 1.0E0     |
| <input type="checkbox"/> | GOTERM_CC_FAT         | <a href="#">prefoldin complex</a>                                                                   | RT |     | 5     | 4.7E-1  | 1.0E0     |
| <input type="checkbox"/> | INTERPRO              | <a href="#">Prefoldin beta-like</a>                                                                 | RT |     | 3     | 6.2E-1  | 1.0E0     |
| <input type="checkbox"/> | GOTERM_MF_FAT         | <a href="#">unfolded protein binding</a>                                                            | RT |     | 13    | 6.4E-1  | 1.0E0     |
|                          | Annotation Cluster 19 | Enrichment Score: 0.28                                                                              |    |     | Count | P_Value | Benjamini |
| <input type="checkbox"/> | INTERPRO              | <a href="#">Cytochrome b5</a>                                                                       | RT |     | 5     | 3.1E-1  | 1.0E0     |
| <input type="checkbox"/> | INTERPRO              | <a href="#">Cytochrome b5_heme-binding site</a>                                                     | RT |     | 4     | 4.4E-1  | 1.0E0     |
| <input type="checkbox"/> | SP_PIR_KEYWORDS       | <a href="#">heme</a>                                                                                | RT |     | 4     | 6.5E-1  | 9.8E-1    |
| <input type="checkbox"/> | GOTERM_MF_FAT         | <a href="#">heme binding</a>                                                                        | RT |     | 5     | 6.8E-1  | 1.0E0     |
| <input type="checkbox"/> | GOTERM_MF_FAT         | <a href="#">tetrapyrrole binding</a>                                                                | RT |     | 5     | 6.8E-1  | 1.0E0     |
|                          | Annotation Cluster 20 | Enrichment Score: 0.27                                                                              |    |     | Count | P_Value | Benjamini |
| <input type="checkbox"/> | SP_PIR_KEYWORDS       | <a href="#">membrane</a>                                                                            | RT |     | 18    | 3.7E-1  | 9.7E-1    |
| <input type="checkbox"/> | SP_PIR_KEYWORDS       | <a href="#">transmembrane</a>                                                                       | RT |     | 19    | 4.8E-1  | 9.6E-1    |
| <input type="checkbox"/> | GOTERM_CC_FAT         | <a href="#">integral to membrane</a>                                                                | RT |     | 37    | 6.8E-1  | 1.0E0     |
| <input type="checkbox"/> | GOTERM_CC_FAT         | <a href="#">intrinsic to membrane</a>                                                               | RT |     | 37    | 6.8E-1  | 1.0E0     |
|                          | Annotation Cluster 21 | Enrichment Score: 0.26                                                                              |    |     | Count | P_Value | Benjamini |
| <input type="checkbox"/> | INTERPRO              | <a href="#">ATPase_P-type_ATPase-associated region</a>                                              | RT |     | 9     | 2.6E-1  | 1.0E0     |
| <input type="checkbox"/> | INTERPRO              | <a href="#">ATPase_P-type phosphorylation site</a>                                                  | RT |     | 7     | 2.8E-1  | 1.0E0     |
| <input type="checkbox"/> | INTERPRO              | <a href="#">ATPase_P-type_K/Mg/Cd/Cu/Zn/Na/Ca/Na/H-transporter</a>                                  | RT |     | 9     | 3.9E-1  | 1.0E0     |
| <input type="checkbox"/> | GOTERM_MF_FAT         | <a href="#">ATPase activity_coupled to transmembrane movement of ions_phosphorylative mechanism</a> | RT |     | 9     | 3.9E-1  | 1.0E0     |
| <input type="checkbox"/> | GOTERM_MF_FAT         | <a href="#">lipid transporter activity</a>                                                          | RT |     | 5     | 5.1E-1  | 1.0E0     |
| <input type="checkbox"/> | GOTERM_MF_FAT         | <a href="#">phospholipid-translocating ATPase activity</a>                                          | RT |     | 4     | 6.5E-1  | 1.0E0     |
| <input type="checkbox"/> | GOTERM_MF_FAT         | <a href="#">phospholipid transporter activity</a>                                                   | RT |     | 4     | 6.5E-1  | 1.0E0     |
| <input type="checkbox"/> | GOTERM_MF_FAT         | <a href="#">aminophospholipid transporter activity</a>                                              | RT |     | 4     | 6.5E-1  | 1.0E0     |
| <input type="checkbox"/> | GOTERM_BP_FAT         | <a href="#">lipid transport</a>                                                                     | RT |     | 4     | 6.6E-1  | 1.0E0     |
| <input type="checkbox"/> | GOTERM_BP_FAT         | <a href="#">lipid localization</a>                                                                  | RT |     | 4     | 6.6E-1  | 1.0E0     |
| <input type="checkbox"/> | INTERPRO              | <a href="#">ATPase_P-type_phospholipid-translocating_flippase</a>                                   | RT |     | 3     | 8.0E-1  | 1.0E0     |
| <input type="checkbox"/> | GOTERM_BP_FAT         | <a href="#">phospholipid transport</a>                                                              | RT |     | 3     | 8.0E-1  | 1.0E0     |
| <input type="checkbox"/> | GOTERM_MF_FAT         | <a href="#">magnesium ion binding</a>                                                               | RT |     | 8     | 8.8E-1  | 1.0E0     |
|                          | Annotation Cluster 22 | Enrichment Score: 0.26                                                                              |    |     | Count | P_Value | Benjamini |
| <input type="checkbox"/> | INTERPRO              | <a href="#">DNA/RNA helicase_DEAD/DEAH box type_N-terminal</a>                                      | RT |     | 20    | 3.5E-1  | 1.0E0     |
| <input type="checkbox"/> | SP_PIR_KEYWORDS       | <a href="#">helicase</a>                                                                            | RT |     | 28    | 3.8E-1  | 9.6E-1    |
| <input type="checkbox"/> | GOTERM_MF_FAT         | <a href="#">purine NTP-dependent helicase activity</a>                                              | RT |     | 24    | 4.6E-1  | 1.0E0     |
| <input type="checkbox"/> | GOTERM_MF_FAT         | <a href="#">ATP-dependent helicase activity</a>                                                     | RT |     | 24    | 4.6E-1  | 1.0E0     |
| <input type="checkbox"/> | GOTERM_MF_FAT         | <a href="#">ATPase activity</a>                                                                     | RT |     | 56    | 5.4E-1  | 1.0E0     |
| <input type="checkbox"/> | GOTERM_MF_FAT         | <a href="#">ATPase activity_coupled</a>                                                             | RT |     | 42    | 5.4E-1  | 1.0E0     |
| <input type="checkbox"/> | INTERPRO              | <a href="#">RNA helicase_DEAD-box type_Q motif</a>                                                  | RT |     | 11    | 5.8E-1  | 1.0E0     |
| <input type="checkbox"/> | SMART                 | <a href="#">HELICc</a>                                                                              | RT |     | 26    | 6.1E-1  | 1.0E0     |
| <input type="checkbox"/> | GOTERM_MF_FAT         | <a href="#">helicase activity</a>                                                                   | RT |     | 32    | 6.2E-1  | 1.0E0     |
| <input type="checkbox"/> | INTERPRO              | <a href="#">DNA/RNA helicase_C-terminal</a>                                                         | RT |     | 26    | 6.4E-1  | 1.0E0     |
| <input type="checkbox"/> | INTERPRO              | <a href="#">Helicase_superfamily 1 and 2_ATP-binding</a>                                            | RT |     | 25    | 6.9E-1  | 1.0E0     |
| <input type="checkbox"/> | SMART                 | <a href="#">DEXDc</a>                                                                               | RT |     | 24    | 7.7E-1  | 1.0E0     |
| <input type="checkbox"/> | INTERPRO              | <a href="#">DEAD-like helicase_N-terminal</a>                                                       | RT |     | 24    | 7.9E-1  | 1.0E0     |
|                          | Annotation Cluster 23 | Enrichment Score: 0.25                                                                              |    |     | Count | P_Value | Benjamini |
| <input type="checkbox"/> | INTERPRO              | <a href="#">Thioredoxin-like</a>                                                                    | RT |     | 10    | 3.1E-1  | 1.0E0     |
| <input type="checkbox"/> | GOTERM_BP_FAT         | <a href="#">cellular homeostasis</a>                                                                | RT |     | 13    | 4.3E-1  | 1.0E0     |
| <input type="checkbox"/> | INTERPRO              | <a href="#">Thioredoxin domain</a>                                                                  | RT |     | 5     | 5.1E-1  | 1.0E0     |
| <input type="checkbox"/> | INTERPRO              | <a href="#">Thioredoxin_conserved site</a>                                                          | RT |     | 5     | 5.1E-1  | 1.0E0     |
| <input type="checkbox"/> | GOTERM_BP_FAT         | <a href="#">cell redox homeostasis</a>                                                              | RT |     | 12    | 5.1E-1  | 1.0E0     |
| <input type="checkbox"/> | GOTERM_BP_FAT         | <a href="#">homeostatic process</a>                                                                 | RT |     | 13    | 5.4E-1  | 1.0E0     |
| <input type="checkbox"/> | INTERPRO              | <a href="#">Thioredoxin fold</a>                                                                    | RT |     | 14    | 5.6E-1  | 1.0E0     |
| <input type="checkbox"/> | INTERPRO              | <a href="#">Thioredoxin-like subdomain</a>                                                          | RT |     | 4     | 6.5E-1  | 1.0E0     |
| <input type="checkbox"/> | INTERPRO              | <a href="#">Thioredoxin_core</a>                                                                    | RT |     | 5     | 6.8E-1  | 1.0E0     |

| <input type="checkbox"/> | Source          | Term                                                                                    | RT | Count | P-Value | Benjamini         |
|--------------------------|-----------------|-----------------------------------------------------------------------------------------|----|-------|---------|-------------------|
| <input type="checkbox"/> | INTERPRO        | <a href="#">Alkyl hydroperoxide reductase/ Thiol specific antioxidant/ Mal allergen</a> | RT | 4     | 8.0E-1  | 1.0E0             |
| <input type="checkbox"/> | GOTERM_MF_FAT   | <a href="#">antioxidant activity</a>                                                    | RT | 4     | 8.9E-1  | 1.0E0             |
| Annotation Cluster 24    |                 |                                                                                         |    |       |         |                   |
|                          |                 | Enrichment Score: 0.25                                                                  |    |       | Count   | P-Value Benjamini |
| <input type="checkbox"/> | GOTERM_CC_FAT   | <a href="#">microtubule associated complex</a>                                          | RT | 10    | 5.0E-1  | 1.0E0             |
| <input type="checkbox"/> | GOTERM_CC_FAT   | <a href="#">dynein complex</a>                                                          | RT | 8     | 5.7E-1  | 1.0E0             |
| <input type="checkbox"/> | INTERPRO        | <a href="#">Dynein heavy chain</a>                                                      | RT | 8     | 6.2E-1  | 1.0E0             |
| Annotation Cluster 25    |                 |                                                                                         |    |       |         |                   |
|                          |                 | Enrichment Score: 0.24                                                                  |    |       | Count   | P-Value Benjamini |
| <input type="checkbox"/> | GOTERM_CC_FAT   | <a href="#">endomembrane system</a>                                                     | RT | 11    | 4.1E-1  | 1.0E0             |
| <input type="checkbox"/> | GOTERM_CC_FAT   | <a href="#">pore complex</a>                                                            | RT | 4     | 6.2E-1  | 1.0E0             |
| <input type="checkbox"/> | GOTERM_CC_FAT   | <a href="#">envelope</a>                                                                | RT | 4     | 6.2E-1  | 1.0E0             |
| <input type="checkbox"/> | GOTERM_CC_FAT   | <a href="#">organelle envelope</a>                                                      | RT | 4     | 6.2E-1  | 1.0E0             |
| <input type="checkbox"/> | GOTERM_CC_FAT   | <a href="#">nuclear pore</a>                                                            | RT | 4     | 6.2E-1  | 1.0E0             |
| <input type="checkbox"/> | GOTERM_CC_FAT   | <a href="#">nuclear envelope</a>                                                        | RT | 4     | 6.2E-1  | 1.0E0             |
| Annotation Cluster 26    |                 |                                                                                         |    |       |         |                   |
|                          |                 | Enrichment Score: 0.24                                                                  |    |       | Count   | P-Value Benjamini |
| <input type="checkbox"/> | GOTERM_MF_FAT   | <a href="#">acid-amino acid ligase activity</a>                                         | RT | 19    | 2.5E-1  | 1.0E0             |
| <input type="checkbox"/> | GOTERM_MF_FAT   | <a href="#">ligase activity, forming carbon-nitrogen bonds</a>                          | RT | 22    | 2.6E-1  | 1.0E0             |
| <input type="checkbox"/> | SP_PIR_KEYWORDS | <a href="#">ubl conjugation pathway</a>                                                 | RT | 10    | 3.0E-1  | 9.9E-1            |
| <input type="checkbox"/> | GOTERM_MF_FAT   | <a href="#">small conjugating protein ligase activity</a>                               | RT | 10    | 3.1E-1  | 1.0E0             |
| <input type="checkbox"/> | GOTERM_BP_FAT   | <a href="#">proteolysis</a>                                                             | RT | 55    | 3.2E-1  | 1.0E0             |
| <input type="checkbox"/> | SMART           | <a href="#">UBCc</a>                                                                    | RT | 9     | 3.7E-1  | 1.0E0             |
| <input type="checkbox"/> | INTERPRO        | <a href="#">Ubiquitin-conjugating enzyme, E2</a>                                        | RT | 9     | 3.9E-1  | 1.0E0             |
| <input type="checkbox"/> | INTERPRO        | <a href="#">Ubiquitin-conjugating enzyme/RWD-like</a>                                   | RT | 9     | 3.9E-1  | 1.0E0             |
| <input type="checkbox"/> | GOTERM_BP_FAT   | <a href="#">modification-dependent macromolecule catabolic process</a>                  | RT | 17    | 4.5E-1  | 1.0E0             |
| <input type="checkbox"/> | GOTERM_BP_FAT   | <a href="#">modification-dependent protein catabolic process</a>                        | RT | 17    | 4.5E-1  | 1.0E0             |
| <input type="checkbox"/> | GOTERM_BP_FAT   | <a href="#">macromolecule catabolic process</a>                                         | RT | 24    | 5.4E-1  | 1.0E0             |
| <input type="checkbox"/> | GOTERM_BP_FAT   | <a href="#">cellular macromolecule catabolic process</a>                                | RT | 21    | 5.5E-1  | 1.0E0             |
| <input type="checkbox"/> | GOTERM_BP_FAT   | <a href="#">protein catabolic process</a>                                               | RT | 23    | 6.0E-1  | 1.0E0             |
| <input type="checkbox"/> | GOTERM_BP_FAT   | <a href="#">cellular protein catabolic process</a>                                      | RT | 20    | 6.1E-1  | 1.0E0             |
| <input type="checkbox"/> | GOTERM_BP_FAT   | <a href="#">proteolysis involved in cellular protein catabolic process</a>              | RT | 20    | 6.1E-1  | 1.0E0             |
| <input type="checkbox"/> | GOTERM_CC_FAT   | <a href="#">cytosol</a>                                                                 | RT | 17    | 6.3E-1  | 1.0E0             |
| <input type="checkbox"/> | PIR_SUPERFAMILY | PIRSF001567:ubiquitin-protein ligase E2                                                 | RT | 4     | 7.9E-1  | 1.0E0             |
| <input type="checkbox"/> | GOTERM_BP_FAT   | <a href="#">ubiquitin-dependent protein catabolic process</a>                           | RT | 8     | 8.2E-1  | 1.0E0             |
| <input type="checkbox"/> | INTERPRO        | <a href="#">Proteasome, alpha and beta subunits</a>                                     | RT | 7     | 8.8E-1  | 1.0E0             |
| <input type="checkbox"/> | INTERPRO        | <a href="#">Proteasome, alpha-subunit, conserved site</a>                               | RT | 4     | 8.9E-1  | 1.0E0             |
| <input type="checkbox"/> | GOTERM_CC_FAT   | <a href="#">proteasome core complex</a>                                                 | RT | 7     | 9.1E-1  | 1.0E0             |
| <input type="checkbox"/> | KEGG_PATHWAY    | <a href="#">Proteasome</a>                                                              | RT | 14    | 9.2E-1  | 1.0E0             |
| <input type="checkbox"/> | SP_PIR_KEYWORDS | <a href="#">proteasome</a>                                                              | RT | 10    | 9.2E-1  | 1.0E0             |
| <input type="checkbox"/> | INTERPRO        | <a href="#">Proteasome, subunit alpha/beta</a>                                          | RT | 7     | 9.2E-1  | 1.0E0             |
| <input type="checkbox"/> | GOTERM_MF_FAT   | <a href="#">threonine-type peptidase activity</a>                                       | RT | 7     | 9.3E-1  | 1.0E0             |
| <input type="checkbox"/> | GOTERM_MF_FAT   | <a href="#">threonine-type endopeptidase activity</a>                                   | RT | 7     | 9.3E-1  | 1.0E0             |
| <input type="checkbox"/> | GOTERM_CC_FAT   | <a href="#">proteasome complex</a>                                                      | RT | 10    | 9.3E-1  | 1.0E0             |
| <input type="checkbox"/> | PIR_SUPERFAMILY | PIRSF001212:multicatalytic endopeptidase complex chain C9                               | RT | 3     | 9.5E-1  | 1.0E0             |
| Annotation Cluster 27    |                 |                                                                                         |    |       |         |                   |
|                          |                 | Enrichment Score: 0.23                                                                  |    |       | Count   | P-Value Benjamini |
| <input type="checkbox"/> | INTERPRO        | <a href="#">DNA-directed DNA polymerase, family B, conserved site</a>                   | RT | 4     | 4.4E-1  | 1.0E0             |
| <input type="checkbox"/> | INTERPRO        | <a href="#">DNA-directed DNA polymerase, family B, conserved region2</a>                | RT | 4     | 4.4E-1  | 1.0E0             |
| <input type="checkbox"/> | SP_PIR_KEYWORDS | <a href="#">dna replication</a>                                                         | RT | 7     | 5.8E-1  | 9.8E-1            |
| <input type="checkbox"/> | SMART           | <a href="#">POLBc</a>                                                                   | RT | 4     | 6.4E-1  | 1.0E0             |
| <input type="checkbox"/> | SP_PIR_KEYWORDS | <a href="#">dna-directed dna polymerase</a>                                             | RT | 4     | 6.5E-1  | 9.8E-1            |
| <input type="checkbox"/> | INTERPRO        | <a href="#">DNA-directed DNA polymerase, family B</a>                                   | RT | 4     | 6.5E-1  | 1.0E0             |
| <input type="checkbox"/> | GOTERM_MF_FAT   | <a href="#">DNA-directed DNA polymerase activity</a>                                    | RT | 6     | 8.1E-1  | 1.0E0             |
| Annotation Cluster 28    |                 |                                                                                         |    |       |         |                   |
|                          |                 | Enrichment Score: 0.22                                                                  |    |       | Count   | P-Value Benjamini |
| <input type="checkbox"/> | SMART           | <a href="#">ARF</a>                                                                     | RT | 4     | 4.4E-1  | 1.0E0             |
| <input type="checkbox"/> | INTERPRO        | <a href="#">ADP-ribosylation factor</a>                                                 | RT | 4     | 4.4E-1  | 1.0E0             |
| <input type="checkbox"/> | PIR_SUPERFAMILY | PIRSF001711:ADP-ribosylation factor                                                     | RT | 4     | 6.4E-1  | 1.0E0             |
| <input type="checkbox"/> | GOTERM_BP_FAT   | <a href="#">small GTPase mediated signal transduction</a>                               | RT | 10    | 6.7E-1  | 1.0E0             |
| <input type="checkbox"/> | INTERPRO        | <a href="#">ARF/SAR superfamily</a>                                                     | RT | 5     | 6.8E-1  | 1.0E0             |

| <input type="checkbox"/> | <b>INTERPRO</b>        | <a href="#">Small GTP-binding protein</a>                                                                                    | <b>RT</b> |  |  |  |  | 11    | 8.4E-1  | 1.0EO     |
|--------------------------|------------------------|------------------------------------------------------------------------------------------------------------------------------|-----------|--|--|--|--|-------|---------|-----------|
|                          | Annotation Cluster 29  | Enrichment Score: 0.22                                                                                                       |           |  |  |  |  | Count | P_Value | Benjamini |
| <input type="checkbox"/> | <b>GOTERM_BP_FAT</b>   | <a href="#">regulation of transcription</a>                                                                                  | <b>RT</b> |  |  |  |  | 21    | 3.1E-1  | 1.0EO     |
| <input type="checkbox"/> | <b>GOTERM_CC_FAT</b>   | <a href="#">nucleoplasm part</a>                                                                                             | <b>RT</b> |  |  |  |  | 3     | 6.0E-1  | 1.0EO     |
| <input type="checkbox"/> | <b>GOTERM_CC_FAT</b>   | <a href="#">nucleoplasm</a>                                                                                                  | <b>RT</b> |  |  |  |  | 3     | 6.0E-1  | 1.0EO     |
| <input type="checkbox"/> | <b>GOTERM_CC_FAT</b>   | <a href="#">transcription factor complex</a>                                                                                 | <b>RT</b> |  |  |  |  | 3     | 6.0E-1  | 1.0EO     |
| <input type="checkbox"/> | <b>GOTERM_CC_FAT</b>   | <a href="#">intracellular organelle lumen</a>                                                                                | <b>RT</b> |  |  |  |  | 4     | 6.2E-1  | 1.0EO     |
| <input type="checkbox"/> | <b>GOTERM_CC_FAT</b>   | <a href="#">nuclear lumen</a>                                                                                                | <b>RT</b> |  |  |  |  | 4     | 6.2E-1  | 1.0EO     |
| <input type="checkbox"/> | <b>GOTERM_CC_FAT</b>   | <a href="#">membrane-enclosed lumen</a>                                                                                      | <b>RT</b> |  |  |  |  | 4     | 6.2E-1  | 1.0EO     |
| <input type="checkbox"/> | <b>GOTERM_CC_FAT</b>   | <a href="#">organelle lumen</a>                                                                                              | <b>RT</b> |  |  |  |  | 4     | 6.2E-1  | 1.0EO     |
| <input type="checkbox"/> | <b>GOTERM_BP_FAT</b>   | <a href="#">regulation of transcription, DNA-dependent</a>                                                                   | <b>RT</b> |  |  |  |  | 7     | 8.1E-1  | 1.0EO     |
| <input type="checkbox"/> | <b>GOTERM_BP_FAT</b>   | <a href="#">regulation of RNA metabolic process</a>                                                                          | <b>RT</b> |  |  |  |  | 7     | 8.1E-1  | 1.0EO     |
|                          | Annotation Cluster 30  | Enrichment Score: 0.21                                                                                                       |           |  |  |  |  | Count | P_Value | Benjamini |
| <input type="checkbox"/> | <b>GOTERM_CC_FAT</b>   | <a href="#">organelle membrane</a>                                                                                           | <b>RT</b> |  |  |  |  | 8     | 4.3E-1  | 1.0EO     |
| <input type="checkbox"/> | <b>GOTERM_CC_FAT</b>   | <a href="#">endoplasmic reticulum membrane</a>                                                                               | <b>RT</b> |  |  |  |  | 3     | 6.0E-1  | 1.0EO     |
| <input type="checkbox"/> | <b>GOTERM_CC_FAT</b>   | <a href="#">endoplasmic reticulum part</a>                                                                                   | <b>RT</b> |  |  |  |  | 3     | 6.0E-1  | 1.0EO     |
| <input type="checkbox"/> | <b>GOTERM_CC_FAT</b>   | <a href="#">nuclear envelope-endoplasmic reticulum network</a>                                                               | <b>RT</b> |  |  |  |  | 3     | 6.0E-1  | 1.0EO     |
| <input type="checkbox"/> | <b>GOTERM_CC_FAT</b>   | <a href="#">endoplasmic reticulum</a>                                                                                        | <b>RT</b> |  |  |  |  | 3     | 9.4E-1  | 1.0EO     |
|                          | Annotation Cluster 31  | Enrichment Score: 0.21                                                                                                       |           |  |  |  |  | Count | P_Value | Benjamini |
| <input type="checkbox"/> | <b>GOTERM_CC_FAT</b>   | <a href="#">ribonucleoprotein complex</a>                                                                                    | <b>RT</b> |  |  |  |  | 58    | 4.4E-1  | 1.0EO     |
| <input type="checkbox"/> | <b>GOTERM_CC_FAT</b>   | <a href="#">intracellular non-membrane-bounded organelle</a>                                                                 | <b>RT</b> |  |  |  |  | 90    | 5.5E-1  | 1.0EO     |
| <input type="checkbox"/> | <b>GOTERM_CC_FAT</b>   | <a href="#">non-membrane-bounded organelle</a>                                                                               | <b>RT</b> |  |  |  |  | 90    | 5.5E-1  | 1.0EO     |
| <input type="checkbox"/> | <b>GOTERM_CC_FAT</b>   | <a href="#">ribosome</a>                                                                                                     | <b>RT</b> |  |  |  |  | 43    | 5.8E-1  | 1.0EO     |
| <input type="checkbox"/> | <b>SP_PIR_KEYWORDS</b> | <a href="#">ribosomal protein</a>                                                                                            | <b>RT</b> |  |  |  |  | 42    | 6.1E-1  | 9.8E-1    |
| <input type="checkbox"/> | <b>KEGG_PATHWAY</b>    | <a href="#">Ribosome</a>                                                                                                     | <b>RT</b> |  |  |  |  | 39    | 6.5E-1  | 1.0EO     |
| <input type="checkbox"/> | <b>GOTERM_BP_FAT</b>   | <a href="#">translation</a>                                                                                                  | <b>RT</b> |  |  |  |  | 64    | 7.3E-1  | 1.0EO     |
| <input type="checkbox"/> | <b>GOTERM_MF_FAT</b>   | <a href="#">structural molecule activity</a>                                                                                 | <b>RT</b> |  |  |  |  | 47    | 7.5E-1  | 1.0EO     |
| <input type="checkbox"/> | <b>GOTERM_MF_FAT</b>   | <a href="#">structural constituent of ribosome</a>                                                                           | <b>RT</b> |  |  |  |  | 38    | 8.3E-1  | 1.0EO     |
|                          | Annotation Cluster 32  | Enrichment Score: 0.19                                                                                                       |           |  |  |  |  | Count | P_Value | Benjamini |
| <input type="checkbox"/> | <b>PIR_SUPERFAMILY</b> | PIRSF005902: DNase_TatD                                                                                                      | <b>RT</b> |  |  |  |  | 3     | 6.1E-1  | 1.0EO     |
| <input type="checkbox"/> | <b>INTERPRO</b>        | <a href="#">Deoxyribonuclease, TatD Mg-dependent</a>                                                                         | <b>RT</b> |  |  |  |  | 3     | 6.2E-1  | 1.0EO     |
| <input type="checkbox"/> | <b>INTERPRO</b>        | <a href="#">Deoxyribonuclease, TatD-related</a>                                                                              | <b>RT</b> |  |  |  |  | 3     | 6.2E-1  | 1.0EO     |
| <input type="checkbox"/> | <b>INTERPRO</b>        | <a href="#">Deoxyribonuclease, TatD</a>                                                                                      | <b>RT</b> |  |  |  |  | 3     | 6.2E-1  | 1.0EO     |
| <input type="checkbox"/> | <b>GOTERM_MF_FAT</b>   | <a href="#">endodeoxyribonuclease activity, producing 5'-phosphomonoesters</a>                                               | <b>RT</b> |  |  |  |  | 3     | 6.2E-1  | 1.0EO     |
| <input type="checkbox"/> | <b>GOTERM_MF_FAT</b>   | <a href="#">deoxyribonuclease activity</a>                                                                                   | <b>RT</b> |  |  |  |  | 3     | 6.2E-1  | 1.0EO     |
| <input type="checkbox"/> | <b>GOTERM_MF_FAT</b>   | <a href="#">endodeoxyribonuclease activity</a>                                                                               | <b>RT</b> |  |  |  |  | 3     | 6.2E-1  | 1.0EO     |
| <input type="checkbox"/> | <b>GOTERM_MF_FAT</b>   | <a href="#">endonuclease activity, active with either ribo- or deoxyribonucleic acids and producing 5'-phosphomonoesters</a> | <b>RT</b> |  |  |  |  | 4     | 8.9E-1  | 1.0EO     |
|                          | Annotation Cluster 33  | Enrichment Score: 0.18                                                                                                       |           |  |  |  |  | Count | P_Value | Benjamini |
| <input type="checkbox"/> | <b>INTERPRO</b>        | <a href="#">4Fe-4S ferredoxin, iron-sulphur binding domain</a>                                                               | <b>RT</b> |  |  |  |  | 7     | 4.4E-1  | 1.0EO     |
| <input type="checkbox"/> | <b>INTERPRO</b>        | <a href="#">4Fe-4S ferredoxin, iron-sulphur binding, subgroup</a>                                                            | <b>RT</b> |  |  |  |  | 7     | 4.4E-1  | 1.0EO     |
| <input type="checkbox"/> | <b>GOTERM_MF_FAT</b>   | <a href="#">electron carrier activity</a>                                                                                    | <b>RT</b> |  |  |  |  | 14    | 6.6E-1  | 1.0EO     |
| <input type="checkbox"/> | <b>INTERPRO</b>        | <a href="#">4Fe-4S ferredoxin, iron-sulphur binding, conserved site</a>                                                      | <b>RT</b> |  |  |  |  | 5     | 6.8E-1  | 1.0EO     |
| <input type="checkbox"/> | <b>GOTERM_MF_FAT</b>   | <a href="#">metal cluster binding</a>                                                                                        | <b>RT</b> |  |  |  |  | 11    | 8.4E-1  | 1.0EO     |
| <input type="checkbox"/> | <b>GOTERM_MF_FAT</b>   | <a href="#">iron-sulfur cluster binding</a>                                                                                  | <b>RT</b> |  |  |  |  | 11    | 8.4E-1  | 1.0EO     |
| <input type="checkbox"/> | <b>GOTERM_MF_FAT</b>   | <a href="#">4 iron, 4 sulfur cluster binding</a>                                                                             | <b>RT</b> |  |  |  |  | 4     | 9.4E-1  | 1.0EO     |
|                          | Annotation Cluster 34  | Enrichment Score: 0.16                                                                                                       |           |  |  |  |  | Count | P_Value | Benjamini |
| <input type="checkbox"/> | <b>SMART</b>           | <a href="#">Sm</a>                                                                                                           | <b>RT</b> |  |  |  |  | 5     | 6.6E-1  | 1.0EO     |
| <input type="checkbox"/> | <b>INTERPRO</b>        | <a href="#">Like-Sm ribonucleoprotein, eukaryotic and archaea-type, core</a>                                                 | <b>RT</b> |  |  |  |  | 5     | 6.8E-1  | 1.0EO     |
| <input type="checkbox"/> | <b>INTERPRO</b>        | <a href="#">Like-Sm ribonucleoprotein, core</a>                                                                              | <b>RT</b> |  |  |  |  | 7     | 7.1E-1  | 1.0EO     |
|                          | Annotation Cluster 35  | Enrichment Score: 0.16                                                                                                       |           |  |  |  |  | Count | P_Value | Benjamini |
| <input type="checkbox"/> | <b>GOTERM_BP_FAT</b>   | <a href="#">phospholipid biosynthetic process</a>                                                                            | <b>RT</b> |  |  |  |  | 6     | 3.9E-1  | 1.0EO     |
| <input type="checkbox"/> | <b>GOTERM_BP_FAT</b>   | <a href="#">organophosphate metabolic process</a>                                                                            | <b>RT</b> |  |  |  |  | 9     | 5.3E-1  | 1.0EO     |
| <input type="checkbox"/> | <b>GOTERM_BP_FAT</b>   | <a href="#">phospholipid metabolic process</a>                                                                               | <b>RT</b> |  |  |  |  | 8     | 6.2E-1  | 1.0EO     |
| <input type="checkbox"/> | <b>GOTERM_BP_FAT</b>   | <a href="#">lipid biosynthetic process</a>                                                                                   | <b>RT</b> |  |  |  |  | 8     | 8.2E-1  | 1.0EO     |
| <input type="checkbox"/> | <b>GOTERM_BP_FAT</b>   | <a href="#">glycerolipid metabolic process</a>                                                                               | <b>RT</b> |  |  |  |  | 4     | 8.9E-1  | 1.0EO     |
| <input type="checkbox"/> | <b>GOTERM_BP_FAT</b>   | <a href="#">glycerophospholipid metabolic process</a>                                                                        | <b>RT</b> |  |  |  |  | 4     | 8.9E-1  | 1.0EO     |

| <input type="checkbox"/> | Annotation Cluster                       | Enrichment Score | Term                                                                     | RT | Bar | Count | P_Value | Benjamini |
|--------------------------|------------------------------------------|------------------|--------------------------------------------------------------------------|----|-----|-------|---------|-----------|
| <input type="checkbox"/> | GOTERM_BP_FAT<br>Annotation Cluster 36   | 0.16             | <a href="#">phosphoinositide metabolic process</a>                       | RT |     | 4     | 8.9E-1  | 1.0EO     |
| <input type="checkbox"/> | SMART                                    |                  | <a href="#">ANK</a>                                                      | RT |     | 250   | 5.9E-1  | 1.0EO     |
| <input type="checkbox"/> | INTERPRO                                 |                  | <a href="#">Ankyrin</a>                                                  | RT |     | 250   | 6.7E-1  | 1.0EO     |
| <input type="checkbox"/> | SP_PIR_KEYWORDS<br>Annotation Cluster 37 | 0.16             | <a href="#">ank repeat</a>                                               | RT |     | 170   | 8.5E-1  | 9.9E-1    |
| <input type="checkbox"/> | INTERPRO                                 |                  | <a href="#">Adenylate kinase</a>                                         | RT |     | 3     | 6.2E-1  | 1.0EO     |
| <input type="checkbox"/> | GOTERM_MF_FAT                            |                  | <a href="#">adenylate kinase activity</a>                                | RT |     | 3     | 6.2E-1  | 1.0EO     |
| <input type="checkbox"/> | GOTERM_MF_FAT                            |                  | <a href="#">nucleotide kinase activity</a>                               | RT |     | 4     | 6.5E-1  | 1.0EO     |
| <input type="checkbox"/> | GOTERM_MF_FAT                            |                  | <a href="#">phosphotransferase activity, phosphate group as acceptor</a> | RT |     | 5     | 6.8E-1  | 1.0EO     |
| <input type="checkbox"/> | GOTERM_MF_FAT<br>Annotation Cluster 38   | 0.15             | <a href="#">nucleobase, nucleoside, nucleotide kinase activity</a>       | RT |     | 5     | 9.3E-1  | 1.0EO     |
| <input type="checkbox"/> | INTERPRO                                 |                  | <a href="#">WD40 repeat, conserved site</a>                              | RT |     | 18    | 5.6E-1  | 1.0EO     |
| <input type="checkbox"/> | SP_PIR_KEYWORDS                          |                  | <a href="#">wd repeat</a>                                                | RT |     | 29    | 6.0E-1  | 9.8E-1    |
| <input type="checkbox"/> | INTERPRO                                 |                  | <a href="#">WD40 repeat, subgroup</a>                                    | RT |     | 33    | 6.2E-1  | 1.0EO     |
| <input type="checkbox"/> | INTERPRO                                 |                  | <a href="#">WD40 repeat 2</a>                                            | RT |     | 25    | 6.9E-1  | 1.0EO     |
| <input type="checkbox"/> | INTERPRO                                 |                  | <a href="#">WD40 repeat, region</a>                                      | RT |     | 27    | 7.1E-1  | 1.0EO     |
| <input type="checkbox"/> | SMART                                    |                  | <a href="#">WD40</a>                                                     | RT |     | 40    | 8.4E-1  | 1.0EO     |
| <input type="checkbox"/> | INTERPRO                                 |                  | <a href="#">WD40 repeat</a>                                              | RT |     | 40    | 8.6E-1  | 1.0EO     |
| <input type="checkbox"/> | INTERPRO<br>Annotation Cluster 39        | 0.14             | <a href="#">WD40/YVTN repeat-like</a>                                    | RT |     | 38    | 9.0E-1  | 1.0EO     |
| <input type="checkbox"/> | GOTERM_BP_FAT                            |                  | <a href="#">amine biosynthetic process</a>                               | RT |     | 5     | 5.1E-1  | 1.0EO     |
| <input type="checkbox"/> | GOTERM_BP_FAT                            |                  | <a href="#">cellular amino acid biosynthetic process</a>                 | RT |     | 4     | 6.6E-1  | 1.0EO     |
| <input type="checkbox"/> | GOTERM_BP_FAT                            |                  | <a href="#">organic acid biosynthetic process</a>                        | RT |     | 4     | 8.9E-1  | 1.0EO     |
| <input type="checkbox"/> | GOTERM_BP_FAT<br>Annotation Cluster 40   | 0.13             | <a href="#">carboxylic acid biosynthetic process</a>                     | RT |     | 4     | 8.9E-1  | 1.0EO     |
| <input type="checkbox"/> | GOTERM_MF_FAT                            |                  | <a href="#">thiolester hydrolase activity</a>                            | RT |     | 6     | 5.6E-1  | 1.0EO     |
| <input type="checkbox"/> | INTERPRO                                 |                  | <a href="#">Peptidase C19, ubiquitin carboxyl-terminal hydrolase 2</a>   | RT |     | 4     | 8.0E-1  | 1.0EO     |
| <input type="checkbox"/> | GOTERM_MF_FAT                            |                  | <a href="#">ubiquitin thiolesterase activity</a>                         | RT |     | 4     | 8.0E-1  | 1.0EO     |
| <input type="checkbox"/> | GOTERM_BP_FAT<br>Annotation Cluster 41   | 0.13             | <a href="#">ubiquitin-dependent protein catabolic process</a>            | RT |     | 8     | 8.2E-1  | 1.0EO     |
| <input type="checkbox"/> | GOTERM_MF_FAT                            |                  | <a href="#">unfolded protein binding</a>                                 | RT |     | 13    | 6.4E-1  | 1.0EO     |
| <input type="checkbox"/> | GOTERM_BP_FAT                            |                  | <a href="#">protein folding</a>                                          | RT |     | 17    | 7.8E-1  | 1.0EO     |
| <input type="checkbox"/> | SP_PIR_KEYWORDS<br>Annotation Cluster 42 | 0.13             | <a href="#">Chaperone</a>                                                | RT |     | 7     | 8.0E-1  | 9.9E-1    |
| <input type="checkbox"/> | SMART                                    |                  | <a href="#">VWA</a>                                                      | RT |     | 5     | 6.6E-1  | 1.0EO     |
| <input type="checkbox"/> | INTERPRO                                 |                  | <a href="#">von Willebrand factor, type A</a>                            | RT |     | 5     | 6.8E-1  | 1.0EO     |
| <input type="checkbox"/> | INTERPRO<br>Annotation Cluster 43        | 0.12             | <a href="#">Copine</a>                                                   | RT |     | 3     | 9.0E-1  | 1.0EO     |
| <input type="checkbox"/> | SP_PIR_KEYWORDS                          |                  | <a href="#">Acyltransferase</a>                                          | RT |     | 8     | 4.7E-1  | 9.6E-1    |
| <input type="checkbox"/> | INTERPRO                                 |                  | <a href="#">Acyl-CoA N-acyltransferase</a>                               | RT |     | 6     | 8.0E-1  | 1.0EO     |
| <input type="checkbox"/> | GOTERM_MF_FAT                            |                  | <a href="#">N-acyltransferase activity</a>                               | RT |     | 6     | 8.1E-1  | 1.0EO     |
| <input type="checkbox"/> | GOTERM_MF_FAT                            |                  | <a href="#">acetyltransferase activity</a>                               | RT |     | 6     | 8.1E-1  | 1.0EO     |
| <input type="checkbox"/> | INTERPRO                                 |                  | <a href="#">GCN5-related N-acetyltransferase</a>                         | RT |     | 5     | 8.8E-1  | 1.0EO     |
| <input type="checkbox"/> | GOTERM_MF_FAT<br>Annotation Cluster 44   | 0.12             | <a href="#">N-acetyltransferase activity</a>                             | RT |     | 5     | 8.8E-1  | 1.0EO     |
| <input type="checkbox"/> | INTERPRO                                 |                  | <a href="#">EGF-like, type 3</a>                                         | RT |     | 20    | 5.2E-1  | 1.0EO     |
| <input type="checkbox"/> | SMART                                    |                  | <a href="#">EGF_Lam</a>                                                  | RT |     | 13    | 9.2E-1  | 1.0EO     |
| <input type="checkbox"/> | INTERPRO<br>Annotation Cluster 45        | 0.12             | <a href="#">EGF-like, laminin</a>                                        | RT |     | 13    | 9.3E-1  | 1.0EO     |
| <input type="checkbox"/> | INTERPRO                                 |                  | <a href="#">Molecular chaperone, heat shock protein, Hsp40, DnaJ</a>     | RT |     | 5     | 6.8E-1  | 1.0EO     |
| <input type="checkbox"/> | SMART                                    |                  | <a href="#">DnaJ</a>                                                     | RT |     | 5     | 7.9E-1  | 1.0EO     |
| <input type="checkbox"/> | INTERPRO                                 |                  | <a href="#">Heat shock protein DnaJ, N-terminal</a>                      | RT |     | 5     | 8.0E-1  | 1.0EO     |
| <input type="checkbox"/> | GOTERM_MF_FAT<br>Annotation Cluster 46   | 0.11             | <a href="#">heat shock protein binding</a>                               | RT |     | 5     | 8.0E-1  | 1.0EO     |
| <input type="checkbox"/> | GOTERM_BP_FAT                            |                  | <a href="#">translational elongation</a>                                 | RT |     | 5     | 6.8E-1  | 1.0EO     |
| <input type="checkbox"/> | GOTERM_MF_FAT                            |                  | <a href="#">translation elongation factor activity</a>                   | RT |     | 5     | 8.0E-1  | 1.0EO     |
| <input type="checkbox"/> | SP_PIR_KEYWORDS                          |                  | <a href="#">elongation factor</a>                                        | RT |     | 4     | 8.8E-1  | 9.9E-1    |

|                          |                 | Enrichment Score: 0.1                                                                               |                    |  | Count | P_Value | Benjamini |
|--------------------------|-----------------|-----------------------------------------------------------------------------------------------------|--------------------|--|-------|---------|-----------|
| Annotation Cluster 47    |                 |                                                                                                     |                    |  |       |         |           |
| <input type="checkbox"/> | PIR_SUPERFAMILY | PIRSF002306:tubulin                                                                                 | <a href="#">RT</a> |  | 5     | 6.6E-1  | 1.0E0     |
| <input type="checkbox"/> | INTERPRO        | <a href="#">Tubulin/FtsZ_2-layer sandwich domain</a>                                                | <a href="#">RT</a> |  | 5     | 6.8E-1  | 1.0E0     |
| <input type="checkbox"/> | GOTERM_BP_FAT   | <a href="#">protein complex assembly</a>                                                            | <a href="#">RT</a> |  | 8     | 7.3E-1  | 1.0E0     |
| <input type="checkbox"/> | GOTERM_BP_FAT   | <a href="#">protein complex biogenesis</a>                                                          | <a href="#">RT</a> |  | 8     | 7.3E-1  | 1.0E0     |
| <input type="checkbox"/> | INTERPRO        | <a href="#">Beta tubulin autoregulation binding site</a>                                            | <a href="#">RT</a> |  | 4     | 8.0E-1  | 1.0E0     |
| <input type="checkbox"/> | INTERPRO        | <a href="#">Tubulin/FtsZ_GTPase domain</a>                                                          | <a href="#">RT</a> |  | 5     | 8.0E-1  | 1.0E0     |
| <input type="checkbox"/> | INTERPRO        | <a href="#">Tubulin conserved site</a>                                                              | <a href="#">RT</a> |  | 5     | 8.0E-1  | 1.0E0     |
| <input type="checkbox"/> | INTERPRO        | <a href="#">Tubulin</a>                                                                             | <a href="#">RT</a> |  | 5     | 8.0E-1  | 1.0E0     |
| <input type="checkbox"/> | GOTERM_BP_FAT   | <a href="#">protein polymerization</a>                                                              | <a href="#">RT</a> |  | 5     | 8.0E-1  | 1.0E0     |
| <input type="checkbox"/> | GOTERM_BP_FAT   | <a href="#">macromolecular complex subunit organization</a>                                         | <a href="#">RT</a> |  | 15    | 8.2E-1  | 1.0E0     |
| <input type="checkbox"/> | GOTERM_BP_FAT   | <a href="#">macromolecular complex assembly</a>                                                     | <a href="#">RT</a> |  | 14    | 8.6E-1  | 1.0E0     |
| <input type="checkbox"/> | GOTERM_BP_FAT   | <a href="#">cellular protein complex assembly</a>                                                   | <a href="#">RT</a> |  | 6     | 8.8E-1  | 1.0E0     |
| <input type="checkbox"/> | GOTERM_MF_FAT   | <a href="#">GTPase activity</a>                                                                     | <a href="#">RT</a> |  | 9     | 8.8E-1  | 1.0E0     |
| <input type="checkbox"/> | GOTERM_BP_FAT   | <a href="#">cellular macromolecular complex subunit organization</a>                                | <a href="#">RT</a> |  | 13    | 9.0E-1  | 1.0E0     |
| <input type="checkbox"/> | GOTERM_BP_FAT   | <a href="#">cellular macromolecular complex assembly</a>                                            | <a href="#">RT</a> |  | 12    | 9.3E-1  | 1.0E0     |
| Annotation Cluster 48    |                 |                                                                                                     |                    |  |       |         |           |
|                          |                 | Enrichment Score: 0.08                                                                              |                    |  | Count | P_Value | Benjamini |
| <input type="checkbox"/> | GOTERM_MF_FAT   | <a href="#">exopeptidase activity</a>                                                               | <a href="#">RT</a> |  | 7     | 7.2E-1  | 1.0E0     |
| <input type="checkbox"/> | GOTERM_MF_FAT   | <a href="#">metallopeptidase activity</a>                                                           | <a href="#">RT</a> |  | 7     | 8.8E-1  | 1.0E0     |
| <input type="checkbox"/> | GOTERM_MF_FAT   | <a href="#">metalloexopeptidase activity</a>                                                        | <a href="#">RT</a> |  | 4     | 8.9E-1  | 1.0E0     |
| Annotation Cluster 49    |                 |                                                                                                     |                    |  |       |         |           |
|                          |                 | Enrichment Score: 0.08                                                                              |                    |  | Count | P_Value | Benjamini |
| <input type="checkbox"/> | INTERPRO        | <a href="#">RNA-directed DNA polymerase (reverse transcriptase)</a>                                 | <a href="#">RT</a> |  | 5     | 6.8E-1  | 1.0E0     |
| <input type="checkbox"/> | GOTERM_BP_FAT   | <a href="#">RNA-dependent DNA replication</a>                                                       | <a href="#">RT</a> |  | 5     | 6.8E-1  | 1.0E0     |
| <input type="checkbox"/> | INTERPRO        | <a href="#">RNA-directed DNA polymerase (reverse transcriptase)_related</a>                         | <a href="#">RT</a> |  | 3     | 9.0E-1  | 1.0E0     |
| <input type="checkbox"/> | GOTERM_MF_FAT   | <a href="#">RNA-directed DNA polymerase activity</a>                                                | <a href="#">RT</a> |  | 11    | 9.7E-1  | 1.0E0     |
| <input type="checkbox"/> | SP_PIR_KEYWORDS | <a href="#">rna-directed dna polymerase</a>                                                         | <a href="#">RT</a> |  | 10    | 9.8E-1  | 1.0E0     |
| Annotation Cluster 50    |                 |                                                                                                     |                    |  |       |         |           |
|                          |                 | Enrichment Score: 0.07                                                                              |                    |  | Count | P_Value | Benjamini |
| <input type="checkbox"/> | SMART           | <a href="#">RRM</a>                                                                                 | <a href="#">RT</a> |  | 8     | 8.0E-1  | 1.0E0     |
| <input type="checkbox"/> | INTERPRO        | <a href="#">RNA recognition motif_RNP-1</a>                                                         | <a href="#">RT</a> |  | 8     | 8.2E-1  | 1.0E0     |
| <input type="checkbox"/> | INTERPRO        | <a href="#">Nucleotide-binding_alpha-beta_plait</a>                                                 | <a href="#">RT</a> |  | 8     | 9.2E-1  | 1.0E0     |
| Annotation Cluster 51    |                 |                                                                                                     |                    |  |       |         |           |
|                          |                 | Enrichment Score: 0.07                                                                              |                    |  | Count | P_Value | Benjamini |
| <input type="checkbox"/> | GOTERM_BP_FAT   | <a href="#">intracellular signaling cascade</a>                                                     | <a href="#">RT</a> |  | 13    | 6.4E-1  | 1.0E0     |
| <input type="checkbox"/> | GOTERM_BP_FAT   | <a href="#">small GTPase mediated signal transduction</a>                                           | <a href="#">RT</a> |  | 10    | 6.7E-1  | 1.0E0     |
| <input type="checkbox"/> | SP_PIR_KEYWORDS | <a href="#">gtp-binding</a>                                                                         | <a href="#">RT</a> |  | 22    | 8.0E-1  | 9.9E-1    |
| <input type="checkbox"/> | INTERPRO        | <a href="#">Small GTP-binding protein</a>                                                           | <a href="#">RT</a> |  | 11    | 8.4E-1  | 1.0E0     |
| <input type="checkbox"/> | INTERPRO        | <a href="#">Ras GTPase</a>                                                                          | <a href="#">RT</a> |  | 7     | 8.8E-1  | 1.0E0     |
| <input type="checkbox"/> | GOTERM_MF_FAT   | <a href="#">GTPase activity</a>                                                                     | <a href="#">RT</a> |  | 9     | 8.8E-1  | 1.0E0     |
| <input type="checkbox"/> | PIR_SUPERFAMILY | PIRSF001710:Ras-related protein Rab                                                                 | <a href="#">RT</a> |  | 3     | 9.5E-1  | 1.0E0     |
| <input type="checkbox"/> | GOTERM_MF_FAT   | <a href="#">GTP binding</a>                                                                         | <a href="#">RT</a> |  | 24    | 9.5E-1  | 1.0E0     |
| <input type="checkbox"/> | GOTERM_MF_FAT   | <a href="#">guanyl ribonucleotide binding</a>                                                       | <a href="#">RT</a> |  | 24    | 9.5E-1  | 1.0E0     |
| <input type="checkbox"/> | GOTERM_MF_FAT   | <a href="#">guanyl nucleotide binding</a>                                                           | <a href="#">RT</a> |  | 24    | 9.5E-1  | 1.0E0     |
| <input type="checkbox"/> | INTERPRO        | <a href="#">Ras</a>                                                                                 | <a href="#">RT</a> |  | 5     | 9.8E-1  | 1.0E0     |
| Annotation Cluster 52    |                 |                                                                                                     |                    |  |       |         |           |
|                          |                 | Enrichment Score: 0.07                                                                              |                    |  | Count | P_Value | Benjamini |
| <input type="checkbox"/> | KEGG_PATHWAY    | <a href="#">DNA replication</a>                                                                     | <a href="#">RT</a> |  | 12    | 7.5E-1  | 1.0E0     |
| <input type="checkbox"/> | KEGG_PATHWAY    | <a href="#">Nucleotide excision repair</a>                                                          | <a href="#">RT</a> |  | 8     | 9.1E-1  | 1.0E0     |
| <input type="checkbox"/> | KEGG_PATHWAY    | <a href="#">Mismatch repair</a>                                                                     | <a href="#">RT</a> |  | 7     | 9.2E-1  | 1.0E0     |
| Annotation Cluster 53    |                 |                                                                                                     |                    |  |       |         |           |
|                          |                 | Enrichment Score: 0.06                                                                              |                    |  | Count | P_Value | Benjamini |
| <input type="checkbox"/> | SP_PIR_KEYWORDS | <a href="#">iron</a>                                                                                | <a href="#">RT</a> |  | 12    | 6.9E-1  | 9.8E-1    |
| <input type="checkbox"/> | GOTERM_MF_FAT   | <a href="#">iron ion binding</a>                                                                    | <a href="#">RT</a> |  | 18    | 7.2E-1  | 1.0E0     |
| <input type="checkbox"/> | SMART           | <a href="#">PP2Ac</a>                                                                               | <a href="#">RT</a> |  | 8     | 8.7E-1  | 1.0E0     |
| <input type="checkbox"/> | INTERPRO        | <a href="#">Serine/threonine-specific protein phosphatase and bis(5-nucleosyl)-tetraphosphatase</a> | <a href="#">RT</a> |  | 8     | 8.8E-1  | 1.0E0     |
| <input type="checkbox"/> | INTERPRO        | <a href="#">Metallophosphoesterase</a>                                                              | <a href="#">RT</a> |  | 11    | 8.9E-1  | 1.0E0     |
| <input type="checkbox"/> | PIR_SUPERFAMILY | PIRSF000908:serine/threonine-protein phosphatase, conventional type                                 | <a href="#">RT</a> |  | 4     | 9.4E-1  | 1.0E0     |
| <input type="checkbox"/> | GOTERM_MF_FAT   | <a href="#">phosphoprotein phosphatase activity</a>                                                 | <a href="#">RT</a> |  | 11    | 1.0E0   | 1.0E0     |
| <input type="checkbox"/> | GOTERM_MF_FAT   | <a href="#">phosphatase activity</a>                                                                | <a href="#">RT</a> |  | 18    | 1.0E0   | 1.0E0     |
| Annotation Cluster 54    |                 |                                                                                                     |                    |  |       |         |           |
|                          |                 | Enrichment Score: 0.06                                                                              |                    |  | Count | P_Value | Benjamini |
| <input type="checkbox"/> | GOTERM_CC_FAT   | <a href="#">organelle membrane</a>                                                                  | <a href="#">RT</a> |  | 8     | 4.3E-1  | 1.0E0     |

|                          |                       |                                                                               |    |  |       |         |           |
|--------------------------|-----------------------|-------------------------------------------------------------------------------|----|--|-------|---------|-----------|
| <input type="checkbox"/> | GOTERM_CC_FAT         | <a href="#">membrane coat</a>                                                 | RT |  | 8     | 7.8E-1  | 1.0E0     |
| <input type="checkbox"/> | GOTERM_CC_FAT         | <a href="#">coated membrane</a>                                               | RT |  | 8     | 7.8E-1  | 1.0E0     |
| <input type="checkbox"/> | GOTERM_CC_FAT         | <a href="#">transport vesicle membrane</a>                                    | RT |  | 3     | 8.8E-1  | 1.0E0     |
| <input type="checkbox"/> | GOTERM_CC_FAT         | <a href="#">transport vesicle</a>                                             | RT |  | 3     | 8.8E-1  | 1.0E0     |
| <input type="checkbox"/> | INTERPRO              | <a href="#">Clathrin/coatomer adaptor, adaptin-like, N-terminal</a>           | RT |  | 3     | 9.0E-1  | 1.0E0     |
| <input type="checkbox"/> | GOTERM_CC_FAT         | <a href="#">membrane-bounded vesicle</a>                                      | RT |  | 3     | 9.4E-1  | 1.0E0     |
| <input type="checkbox"/> | GOTERM_CC_FAT         | <a href="#">vesicle</a>                                                       | RT |  | 3     | 9.4E-1  | 1.0E0     |
| <input type="checkbox"/> | GOTERM_CC_FAT         | <a href="#">cytoplasmic vesicle</a>                                           | RT |  | 3     | 9.4E-1  | 1.0E0     |
| <input type="checkbox"/> | GOTERM_CC_FAT         | <a href="#">coated vesicle membrane</a>                                       | RT |  | 3     | 9.4E-1  | 1.0E0     |
| <input type="checkbox"/> | GOTERM_CC_FAT         | <a href="#">cytoplasmic vesicle membrane</a>                                  | RT |  | 3     | 9.4E-1  | 1.0E0     |
| <input type="checkbox"/> | GOTERM_CC_FAT         | <a href="#">vesicle coat</a>                                                  | RT |  | 3     | 9.4E-1  | 1.0E0     |
| <input type="checkbox"/> | GOTERM_CC_FAT         | <a href="#">cytoplasmic vesicle part</a>                                      | RT |  | 3     | 9.4E-1  | 1.0E0     |
| <input type="checkbox"/> | GOTERM_CC_FAT         | <a href="#">coated vesicle</a>                                                | RT |  | 3     | 9.4E-1  | 1.0E0     |
| <input type="checkbox"/> | GOTERM_CC_FAT         | <a href="#">cytoplasmic membrane-bounded vesicle</a>                          | RT |  | 3     | 9.4E-1  | 1.0E0     |
| <input type="checkbox"/> | GOTERM_CC_FAT         | <a href="#">vesicle membrane</a>                                              | RT |  | 3     | 9.4E-1  | 1.0E0     |
| <input type="checkbox"/> | GOTERM_CC_FAT         | <a href="#">Golgi apparatus part</a>                                          | RT |  | 3     | 9.9E-1  | 1.0E0     |
| <input type="checkbox"/> | GOTERM_CC_FAT         | <a href="#">Golgi apparatus</a>                                               | RT |  | 3     | 1.0E0   | 1.0E0     |
|                          | Annotation Cluster 55 | Enrichment Score: 0.05                                                        |    |  | Count | P_Value | Benjamini |
| <input type="checkbox"/> | GOTERM_CC_FAT         | <a href="#">membrane coat</a>                                                 | RT |  | 8     | 7.8E-1  | 1.0E0     |
| <input type="checkbox"/> | GOTERM_CC_FAT         | <a href="#">coated membrane</a>                                               | RT |  | 8     | 7.8E-1  | 1.0E0     |
| <input type="checkbox"/> | GOTERM_BP_FAT         | <a href="#">establishment of protein localization</a>                         | RT |  | 18    | 8.4E-1  | 1.0E0     |
| <input type="checkbox"/> | GOTERM_BP_FAT         | <a href="#">protein transport</a>                                             | RT |  | 18    | 8.4E-1  | 1.0E0     |
| <input type="checkbox"/> | GOTERM_BP_FAT         | <a href="#">protein localization</a>                                          | RT |  | 18    | 8.8E-1  | 1.0E0     |
| <input type="checkbox"/> | GOTERM_BP_FAT         | <a href="#">intracellular transport</a>                                       | RT |  | 14    | 9.3E-1  | 1.0E0     |
| <input type="checkbox"/> | GOTERM_BP_FAT         | <a href="#">intracellular protein transport</a>                               | RT |  | 11    | 9.5E-1  | 1.0E0     |
| <input type="checkbox"/> | GOTERM_BP_FAT         | <a href="#">cellular macromolecule localization</a>                           | RT |  | 11    | 9.5E-1  | 1.0E0     |
| <input type="checkbox"/> | GOTERM_BP_FAT         | <a href="#">cellular protein localization</a>                                 | RT |  | 11    | 9.5E-1  | 1.0E0     |
| <input type="checkbox"/> | GOTERM_BP_FAT         | <a href="#">vesicle-mediated transport</a>                                    | RT |  | 14    | 9.5E-1  | 1.0E0     |
|                          | Annotation Cluster 56 | Enrichment Score: 0.05                                                        |    |  | Count | P_Value | Benjamini |
| <input type="checkbox"/> | GOTERM_MF_FAT         | <a href="#">cation binding</a>                                                | RT |  | 146   | 7.8E-1  | 1.0E0     |
| <input type="checkbox"/> | GOTERM_MF_FAT         | <a href="#">ion binding</a>                                                   | RT |  | 146   | 7.8E-1  | 1.0E0     |
| <input type="checkbox"/> | GOTERM_MF_FAT         | <a href="#">metal ion binding</a>                                             | RT |  | 144   | 7.9E-1  | 1.0E0     |
| <input type="checkbox"/> | SP_PIR_KEYWORDS       | <a href="#">metal-binding</a>                                                 | RT |  | 54    | 8.7E-1  | 1.0E0     |
| <input type="checkbox"/> | SP_PIR_KEYWORDS       | <a href="#">zinc</a>                                                          | RT |  | 45    | 8.8E-1  | 9.9E-1    |
| <input type="checkbox"/> | GOTERM_MF_FAT         | <a href="#">transition metal ion binding</a>                                  | RT |  | 101   | 9.4E-1  | 1.0E0     |
| <input type="checkbox"/> | INTERPRO              | <a href="#">Zinc finger, C3HC4 RING-type</a>                                  | RT |  | 17    | 9.5E-1  | 1.0E0     |
| <input type="checkbox"/> | GOTERM_MF_FAT         | <a href="#">zinc ion binding</a>                                              | RT |  | 80    | 9.5E-1  | 1.0E0     |
| <input type="checkbox"/> | SP_PIR_KEYWORDS       | <a href="#">zinc-finger</a>                                                   | RT |  | 30    | 9.6E-1  | 1.0E0     |
| <input type="checkbox"/> | SMART                 | <a href="#">RING</a>                                                          | RT |  | 33    | 9.6E-1  | 1.0E0     |
| <input type="checkbox"/> | INTERPRO              | <a href="#">Zinc finger, RING-type</a>                                        | RT |  | 33    | 9.7E-1  | 1.0E0     |
|                          | Annotation Cluster 57 | Enrichment Score: 0.05                                                        |    |  | Count | P_Value | Benjamini |
| <input type="checkbox"/> | INTERPRO              | <a href="#">ATPase, AAA-type, core</a>                                        | RT |  | 14    | 8.0E-1  | 1.0E0     |
| <input type="checkbox"/> | SMART                 | <a href="#">AAA</a>                                                           | RT |  | 36    | 9.4E-1  | 1.0E0     |
| <input type="checkbox"/> | INTERPRO              | <a href="#">ATPase, AAA+ type, core</a>                                       | RT |  | 36    | 9.5E-1  | 1.0E0     |
|                          | Annotation Cluster 58 | Enrichment Score: 0.05                                                        |    |  | Count | P_Value | Benjamini |
| <input type="checkbox"/> | INTERPRO              | <a href="#">Aminoacyl-tRNA synthetase, class I, conserved site</a>            | RT |  | 6     | 7.0E-1  | 1.0E0     |
| <input type="checkbox"/> | SP_PIR_KEYWORDS       | <a href="#">ligase</a>                                                        | RT |  | 31    | 7.4E-1  | 9.9E-1    |
| <input type="checkbox"/> | SP_PIR_KEYWORDS       | <a href="#">protein biosynthesis</a>                                          | RT |  | 6     | 8.0E-1  | 9.9E-1    |
| <input type="checkbox"/> | GOTERM_BP_FAT         | <a href="#">tRNA aminoacylation for protein translation</a>                   | RT |  | 11    | 9.3E-1  | 1.0E0     |
| <input type="checkbox"/> | GOTERM_MF_FAT         | <a href="#">aminoacyl-tRNA ligase activity</a>                                | RT |  | 12    | 9.3E-1  | 1.0E0     |
| <input type="checkbox"/> | GOTERM_MF_FAT         | <a href="#">ligase activity, forming carbon-oxvgen bonds</a>                  | RT |  | 12    | 9.3E-1  | 1.0E0     |
| <input type="checkbox"/> | GOTERM_MF_FAT         | <a href="#">ligase activity, forming aminoacyl-tRNA and related compounds</a> | RT |  | 12    | 9.3E-1  | 1.0E0     |
| <input type="checkbox"/> | KEGG_PATHWAY          | <a href="#">Aminoacyl-tRNA biosynthesis</a>                                   | RT |  | 10    | 9.4E-1  | 1.0E0     |
| <input type="checkbox"/> | SP_PIR_KEYWORDS       | <a href="#">Aminoacyl-tRNA synthetase</a>                                     | RT |  | 11    | 9.5E-1  | 1.0E0     |
| <input type="checkbox"/> | INTERPRO              | <a href="#">Rossmann-like alpha/beta/alpha sandwich fold</a>                  | RT |  | 9     | 9.5E-1  | 1.0E0     |
| <input type="checkbox"/> | GOTERM_BP_FAT         | <a href="#">amino acid activation</a>                                         | RT |  | 11    | 9.5E-1  | 1.0E0     |
| <input type="checkbox"/> | GOTERM_BP_FAT         | <a href="#">tRNA aminoacylation</a>                                           | RT |  | 11    | 9.5E-1  | 1.0E0     |

| <input type="checkbox"/> | Term                  | Definition                                                                          | RT | Bar | Count | P_Value | Benjamini |
|--------------------------|-----------------------|-------------------------------------------------------------------------------------|----|-----|-------|---------|-----------|
| <input type="checkbox"/> | GOTERM_BP_FAT         | <a href="#">tRNA metabolic process</a>                                              | RT |     | 19    | 9.7E-1  | 1.0E0     |
| <input type="checkbox"/> | GOTERM_BP_FAT         | <a href="#">ncRNA metabolic process</a>                                             | RT |     | 24    | 9.9E-1  | 1.0E0     |
|                          | Annotation Cluster 59 | Enrichment Score: 0.05                                                              |    |     | Count | P_Value | Benjamini |
| <input type="checkbox"/> | GOTERM_BP_FAT         | <a href="#">water-soluble vitamin biosynthetic process</a>                          | RT |     | 3     | 9.0E-1  | 1.0E0     |
| <input type="checkbox"/> | GOTERM_BP_FAT         | <a href="#">vitamin biosynthetic process</a>                                        | RT |     | 3     | 9.0E-1  | 1.0E0     |
| <input type="checkbox"/> | GOTERM_BP_FAT         | <a href="#">water-soluble vitamin metabolic process</a>                             | RT |     | 3     | 9.0E-1  | 1.0E0     |
| <input type="checkbox"/> | GOTERM_BP_FAT         | <a href="#">vitamin metabolic process</a>                                           | RT |     | 3     | 9.0E-1  | 1.0E0     |
|                          | Annotation Cluster 60 | Enrichment Score: 0.04                                                              |    |     | Count | P_Value | Benjamini |
| <input type="checkbox"/> | SP_PIR_KEYWORDS       | <a href="#">Chaperone</a>                                                           | RT |     | 7     | 8.0E-1  | 9.9E-1    |
| <input type="checkbox"/> | INTERPRO              | <a href="#">Chaperonin Cpn60/TCP-1</a>                                              | RT |     | 5     | 8.8E-1  | 1.0E0     |
| <input type="checkbox"/> | SP_PIR_KEYWORDS       | <a href="#">cytoplasm</a>                                                           | RT |     | 9     | 9.2E-1  | 1.0E0     |
| <input type="checkbox"/> | PIR_SUPERFAMILY       | PIRSF002584: molecular chaperone t-complex-type                                     | RT |     | 4     | 9.4E-1  | 1.0E0     |
| <input type="checkbox"/> | INTERPRO              | <a href="#">Chaperone_tailless_complex_polypeptide_1</a>                            | RT |     | 4     | 9.4E-1  | 1.0E0     |
| <input type="checkbox"/> | INTERPRO              | <a href="#">Chaperonin TCP-1_conserved_site</a>                                     | RT |     | 4     | 9.7E-1  | 1.0E0     |
|                          | Annotation Cluster 61 | Enrichment Score: 0.04                                                              |    |     | Count | P_Value | Benjamini |
| <input type="checkbox"/> | SMART                 | <a href="#">UBQ</a>                                                                 | RT |     | 4     | 8.8E-1  | 1.0E0     |
| <input type="checkbox"/> | INTERPRO              | <a href="#">Ubiquitin</a>                                                           | RT |     | 4     | 8.9E-1  | 1.0E0     |
| <input type="checkbox"/> | INTERPRO              | <a href="#">Ubiquitin supergroup</a>                                                | RT |     | 5     | 9.8E-1  | 1.0E0     |
|                          | Annotation Cluster 62 | Enrichment Score: 0.04                                                              |    |     | Count | P_Value | Benjamini |
| <input type="checkbox"/> | INTERPRO              | <a href="#">ABC transporter-like</a>                                                | RT |     | 12    | 8.9E-1  | 1.0E0     |
| <input type="checkbox"/> | INTERPRO              | <a href="#">ABC transporter_conserved_site</a>                                      | RT |     | 11    | 9.2E-1  | 1.0E0     |
| <input type="checkbox"/> | COG_ONTOLOGY          | <a href="#">Defense mechanisms</a>                                                  | RT |     | 11    | 9.4E-1  | 1.0E0     |
|                          | Annotation Cluster 63 | Enrichment Score: 0.03                                                              |    |     | Count | P_Value | Benjamini |
| <input type="checkbox"/> | GOTERM_BP_FAT         | <a href="#">cytoskeleton organization</a>                                           | RT |     | 9     | 8.3E-1  | 1.0E0     |
| <input type="checkbox"/> | GOTERM_MF_FAT         | <a href="#">lipid binding</a>                                                       | RT |     | 19    | 8.9E-1  | 1.0E0     |
| <input type="checkbox"/> | SMART                 | <a href="#">ANX</a>                                                                 | RT |     | 7     | 9.2E-1  | 1.0E0     |
| <input type="checkbox"/> | INTERPRO              | <a href="#">Annexin repeat</a>                                                      | RT |     | 7     | 9.2E-1  | 1.0E0     |
| <input type="checkbox"/> | GOTERM_MF_FAT         | <a href="#">calcium-dependent phospholipid binding</a>                              | RT |     | 11    | 9.3E-1  | 1.0E0     |
| <input type="checkbox"/> | SP_PIR_KEYWORDS       | <a href="#">annexin</a>                                                             | RT |     | 7     | 9.7E-1  | 1.0E0     |
| <input type="checkbox"/> | INTERPRO              | <a href="#">Annexin</a>                                                             | RT |     | 7     | 9.7E-1  | 1.0E0     |
| <input type="checkbox"/> | INTERPRO              | <a href="#">Alpha giardin</a>                                                       | RT |     | 5     | 9.8E-1  | 1.0E0     |
| <input type="checkbox"/> | GOTERM_MF_FAT         | <a href="#">phospholipid binding</a>                                                | RT |     | 12    | 9.8E-1  | 1.0E0     |
|                          | Annotation Cluster 64 | Enrichment Score: 0.03                                                              |    |     | Count | P_Value | Benjamini |
| <input type="checkbox"/> | SP_PIR_KEYWORDS       | <a href="#">tpr repeat</a>                                                          | RT |     | 5     | 8.8E-1  | 1.0E0     |
| <input type="checkbox"/> | INTERPRO              | <a href="#">Tetratricopeptide TPR-1</a>                                             | RT |     | 10    | 9.2E-1  | 1.0E0     |
| <input type="checkbox"/> | INTERPRO              | <a href="#">Tetratricopeptide region</a>                                            | RT |     | 12    | 9.2E-1  | 1.0E0     |
| <input type="checkbox"/> | INTERPRO              | <a href="#">Tetratricopeptide-like helical</a>                                      | RT |     | 15    | 9.5E-1  | 1.0E0     |
| <input type="checkbox"/> | SMART                 | <a href="#">TPR</a>                                                                 | RT |     | 11    | 9.6E-1  | 1.0E0     |
| <input type="checkbox"/> | INTERPRO              | <a href="#">Tetratricopeptide repeat</a>                                            | RT |     | 11    | 9.7E-1  | 1.0E0     |
|                          | Annotation Cluster 65 | Enrichment Score: 0.03                                                              |    |     | Count | P_Value | Benjamini |
| <input type="checkbox"/> | SP_PIR_KEYWORDS       | <a href="#">Rotamase</a>                                                            | RT |     | 4     | 9.4E-1  | 1.0E0     |
| <input type="checkbox"/> | GOTERM_MF_FAT         | <a href="#">peptidyl-prolyl cis-trans isomerase activity</a>                        | RT |     | 4     | 9.4E-1  | 1.0E0     |
| <input type="checkbox"/> | GOTERM_MF_FAT         | <a href="#">cis-trans isomerase activity</a>                                        | RT |     | 4     | 9.4E-1  | 1.0E0     |
|                          | Annotation Cluster 66 | Enrichment Score: 0.02                                                              |    |     | Count | P_Value | Benjamini |
| <input type="checkbox"/> | GOTERM_BP_FAT         | <a href="#">ribosome biogenesis</a>                                                 | RT |     | 10    | 9.3E-1  | 1.0E0     |
| <input type="checkbox"/> | GOTERM_BP_FAT         | <a href="#">ribonucleoprotein complex biogenesis</a>                                | RT |     | 10    | 9.3E-1  | 1.0E0     |
| <input type="checkbox"/> | GOTERM_BP_FAT         | <a href="#">rRNA metabolic process</a>                                              | RT |     | 6     | 9.6E-1  | 1.0E0     |
| <input type="checkbox"/> | GOTERM_BP_FAT         | <a href="#">rRNA processing</a>                                                     | RT |     | 6     | 9.6E-1  | 1.0E0     |
| <input type="checkbox"/> | GOTERM_BP_FAT         | <a href="#">ncRNA processing</a>                                                    | RT |     | 13    | 9.8E-1  | 1.0E0     |
|                          | Annotation Cluster 67 | Enrichment Score: 0.02                                                              |    |     | Count | P_Value | Benjamini |
| <input type="checkbox"/> | GOTERM_BP_FAT         | <a href="#">nucleobase_nucleoside_nucleotide and nucleic acid catabolic process</a> | RT |     | 3     | 9.5E-1  | 1.0E0     |
| <input type="checkbox"/> | GOTERM_BP_FAT         | <a href="#">nucleobase_nucleoside and nucleotide catabolic process</a>              | RT |     | 3     | 9.5E-1  | 1.0E0     |
| <input type="checkbox"/> | GOTERM_BP_FAT         | <a href="#">nitrogen compound catabolic process</a>                                 | RT |     | 3     | 9.5E-1  | 1.0E0     |
|                          | Annotation Cluster 68 | Enrichment Score: 0.02                                                              |    |     | Count | P_Value | Benjamini |
| <input type="checkbox"/> | GOTERM_BP_FAT         | <a href="#">cofactor metabolic process</a>                                          | RT |     | 6     | 9.3E-1  | 1.0E0     |
| <input type="checkbox"/> | GOTERM_BP_FAT         | <a href="#">coenzyme metabolic process</a>                                          | RT |     | 5     | 9.3E-1  | 1.0E0     |
| <input type="checkbox"/> | GOTERM_BP_FAT         | <a href="#">pyridine nucleotide metabolic process</a>                               | RT |     | 3     | 9.5E-1  | 1.0E0     |
| <input type="checkbox"/> | GOTERM_BP_FAT         | <a href="#">oxidoreduction coenzyme metabolic process</a>                           | RT |     | 3     | 9.5E-1  | 1.0E0     |



| <input type="checkbox"/> | Annotation      | Term                                                     | RT | Bar | Count                  | P_Value | Benjamini |
|--------------------------|-----------------|----------------------------------------------------------|----|-----|------------------------|---------|-----------|
| <input type="checkbox"/> | GOTERM_BP_FAT   | <a href="#">cofactor biosynthetic process</a>            | RT |     | 4                      | 9.7E-1  | 1.0E0     |
| <input type="checkbox"/> | GOTERM_BP_FAT   | <a href="#">coenzyme biosynthetic process</a>            | RT |     | 3                      | 9.8E-1  | 1.0E0     |
| Annotation Cluster 69    |                 |                                                          |    |     | Enrichment Score: 0.01 |         |           |
| <input type="checkbox"/> | GOTERM_BP_FAT   | <a href="#">RNA processing</a>                           | RT |     | 23                     | 9.5E-1  | 1.0E0     |
| <input type="checkbox"/> | GOTERM_BP_FAT   | <a href="#">tRNA processing</a>                          | RT |     | 8                      | 9.5E-1  | 1.0E0     |
| <input type="checkbox"/> | GOTERM_BP_FAT   | <a href="#">tRNA metabolic process</a>                   | RT |     | 19                     | 9.7E-1  | 1.0E0     |
| <input type="checkbox"/> | GOTERM_BP_FAT   | <a href="#">ncRNA processing</a>                         | RT |     | 13                     | 9.8E-1  | 1.0E0     |
| <input type="checkbox"/> | GOTERM_BP_FAT   | <a href="#">ncRNA metabolic process</a>                  | RT |     | 24                     | 9.9E-1  | 1.0E0     |
| Annotation Cluster 70    |                 |                                                          |    |     | Enrichment Score: 0.01 |         |           |
| <input type="checkbox"/> | GOTERM_BP_FAT   | <a href="#">transcription</a>                            | RT |     | 14                     | 8.6E-1  | 1.0E0     |
| <input type="checkbox"/> | KEGG_PATHWAY    | <a href="#">Purine metabolism</a>                        | RT |     | 15                     | 9.6E-1  | 1.0E0     |
| <input type="checkbox"/> | GOTERM_MF_FAT   | <a href="#">RNA polymerase activity</a>                  | RT |     | 10                     | 9.9E-1  | 1.0E0     |
| <input type="checkbox"/> | KEGG_PATHWAY    | <a href="#">RNA polymerase</a>                           | RT |     | 7                      | 9.9E-1  | 1.0E0     |
| <input type="checkbox"/> | GOTERM_MF_FAT   | <a href="#">DNA-directed RNA polymerase activity</a>     | RT |     | 9                      | 9.9E-1  | 1.0E0     |
| <input type="checkbox"/> | KEGG_PATHWAY    | <a href="#">Pyrimidine metabolism</a>                    | RT |     | 13                     | 1.0E0   | 1.0E0     |
| <input type="checkbox"/> | SP_PIR_KEYWORDS | <a href="#">dna-directed rna polymerase</a>              | RT |     | 4                      | 1.0E0   | 1.0E0     |
| Annotation Cluster 71    |                 |                                                          |    |     | Enrichment Score: 0.01 |         |           |
| <input type="checkbox"/> | GOTERM_MF_FAT   | <a href="#">DNA polymerase activity</a>                  | RT |     | 17                     | 9.4E-1  | 1.0E0     |
| <input type="checkbox"/> | GOTERM_MF_FAT   | <a href="#">RNA-directed DNA polymerase activity</a>     | RT |     | 11                     | 9.7E-1  | 1.0E0     |
| <input type="checkbox"/> | SP_PIR_KEYWORDS | <a href="#">rna-directed dna polymerase</a>              | RT |     | 10                     | 9.8E-1  | 1.0E0     |
| <input type="checkbox"/> | GOTERM_MF_FAT   | <a href="#">endonuclease activity</a>                    | RT |     | 15                     | 9.9E-1  | 1.0E0     |
| <input type="checkbox"/> | GOTERM_MF_FAT   | <a href="#">nuclease activity</a>                        | RT |     | 23                     | 9.9E-1  | 1.0E0     |
| <input type="checkbox"/> | SP_PIR_KEYWORDS | <a href="#">Endonuclease</a>                             | RT |     | 12                     | 9.9E-1  | 1.0E0     |
| Annotation Cluster 72    |                 |                                                          |    |     | Enrichment Score: 0.01 |         |           |
| <input type="checkbox"/> | GOTERM_BP_FAT   | <a href="#">cellular macromolecular complex assembly</a> | RT |     | 12                     | 9.3E-1  | 1.0E0     |
| <input type="checkbox"/> | GOTERM_BP_FAT   | <a href="#">chromosome organization</a>                  | RT |     | 8                      | 9.8E-1  | 1.0E0     |
| <input type="checkbox"/> | GOTERM_BP_FAT   | <a href="#">chromatin organization</a>                   | RT |     | 6                      | 9.9E-1  | 1.0E0     |
| <input type="checkbox"/> | GOTERM_CC_FAT   | <a href="#">nucleosome</a>                               | RT |     | 4                      | 9.9E-1  | 1.0E0     |
| <input type="checkbox"/> | GOTERM_BP_FAT   | <a href="#">chromatin assembly or disassembly</a>        | RT |     | 5                      | 9.9E-1  | 1.0E0     |
| <input type="checkbox"/> | SP_PIR_KEYWORDS | <a href="#">chromosomal protein</a>                      | RT |     | 4                      | 9.9E-1  | 1.0E0     |
| <input type="checkbox"/> | INTERPRO        | <a href="#">Histone core</a>                             | RT |     | 4                      | 9.9E-1  | 1.0E0     |
| <input type="checkbox"/> | GOTERM_BP_FAT   | <a href="#">nucleosome assembly</a>                      | RT |     | 4                      | 9.9E-1  | 1.0E0     |
| <input type="checkbox"/> | GOTERM_BP_FAT   | <a href="#">DNA packaging</a>                            | RT |     | 4                      | 9.9E-1  | 1.0E0     |
| <input type="checkbox"/> | GOTERM_BP_FAT   | <a href="#">chromatin assembly</a>                       | RT |     | 4                      | 9.9E-1  | 1.0E0     |
| <input type="checkbox"/> | GOTERM_BP_FAT   | <a href="#">protein-DNA complex assembly</a>             | RT |     | 4                      | 9.9E-1  | 1.0E0     |
| <input type="checkbox"/> | GOTERM_BP_FAT   | <a href="#">nucleosome organization</a>                  | RT |     | 4                      | 9.9E-1  | 1.0E0     |
| <input type="checkbox"/> | INTERPRO        | <a href="#">Histone-fold</a>                             | RT |     | 5                      | 9.9E-1  | 1.0E0     |
| <input type="checkbox"/> | GOTERM_CC_FAT   | <a href="#">chromatin</a>                                | RT |     | 4                      | 9.9E-1  | 1.0E0     |
| <input type="checkbox"/> | GOTERM_CC_FAT   | <a href="#">chromosomal part</a>                         | RT |     | 6                      | 9.9E-1  | 1.0E0     |
| <input type="checkbox"/> | GOTERM_CC_FAT   | <a href="#">chromosome</a>                               | RT |     | 10                     | 1.0E0   | 1.0E0     |
| <input type="checkbox"/> | GOTERM_CC_FAT   | <a href="#">protein-DNA complex</a>                      | RT |     | 4                      | 1.0E0   | 1.0E0     |
| Annotation Cluster 73    |                 |                                                          |    |     | Enrichment Score: 0    |         |           |
| <input type="checkbox"/> | INTERPRO        | <a href="#">Zinc finger, C2H2-type</a>                   | RT |     | 7                      | 9.9E-1  | 1.0E0     |
| <input type="checkbox"/> | SMART           | <a href="#">ZnF_C2H2</a>                                 | RT |     | 6                      | 1.0E0   | 1.0E0     |
| <input type="checkbox"/> | INTERPRO        | <a href="#">Zinc finger, C2H2-like</a>                   | RT |     | 6                      | 1.0E0   | 1.0E0     |
| Annotation Cluster 74    |                 |                                                          |    |     | Enrichment Score: 0    |         |           |
| <input type="checkbox"/> | GOTERM_MF_FAT   | <a href="#">phosphoprotein phosphatase activity</a>      | RT |     | 11                     | 1.0E0   | 1.0E0     |
| <input type="checkbox"/> | GOTERM_BP_FAT   | <a href="#">protein amino acid dephosphorylation</a>     | RT |     | 4                      | 1.0E0   | 1.0E0     |
| <input type="checkbox"/> | GOTERM_BP_FAT   | <a href="#">dephosphorylation</a>                        | RT |     | 4                      | 1.0E0   | 1.0E0     |
| Annotation Cluster 75    |                 |                                                          |    |     | Enrichment Score: 0    |         |           |
| <input type="checkbox"/> | GOTERM_BP_FAT   | <a href="#">response to DNA damage stimulus</a>          | RT |     | 7                      | 1.0E0   | 1.0E0     |
| <input type="checkbox"/> | GOTERM_BP_FAT   | <a href="#">DNA repair</a>                               | RT |     | 7                      | 1.0E0   | 1.0E0     |
| <input type="checkbox"/> | GOTERM_BP_FAT   | <a href="#">cellular response to stress</a>              | RT |     | 7                      | 1.0E0   | 1.0E0     |

236 terms were not clustered.

Please cite [Nature Protocols 2009; 4\(1\):44 & Genome Biology 2003; 4\(5\):P3](#) within any publication that makes use of any methods inspired by DAVID.

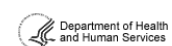

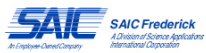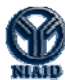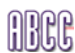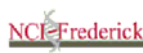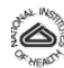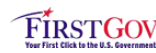

[Term of Service](#) | [Contact Us](#) | [Site Map](#)



## Functional Annotation Clustering

[Help and Manual](#)

Current Gene List: 3\_Random9

Current Background: Giardia intestinalis

3000 DAVID IDs

Options Classification Stringency Medium

Rerun using options

Create Sublist

### 79 Cluster(s)

[Download File](#)

|                          | Annotation Cluster   | Enrichment Score                                             |    |  | Count | P_Value | Benjamini |
|--------------------------|----------------------|--------------------------------------------------------------|----|--|-------|---------|-----------|
| <input type="checkbox"/> | Annotation Cluster 1 | 0.85                                                         |    |  |       |         |           |
| <input type="checkbox"/> | INTERPRO             | <a href="#">EGF-like_type 3</a>                              | RT |  | 24    | 8.2E-2  | 1.0E0     |
| <input type="checkbox"/> | INTERPRO             | <a href="#">EGF-like_laminin</a>                             | RT |  | 19    | 1.8E-1  | 1.0E0     |
| <input type="checkbox"/> | SMART                | <a href="#">EGF_Lam</a>                                      | RT |  | 19    | 1.9E-1  | 1.0E0     |
| <input type="checkbox"/> | Annotation Cluster 2 | 0.81                                                         |    |  |       |         |           |
| <input type="checkbox"/> | SP_PIR_KEYWORDS      | <a href="#">nucleotidyltransferase</a>                       | RT |  | 20    | 7.8E-2  | 1.0E0     |
| <input type="checkbox"/> | KEGG_PATHWAY         | <a href="#">Purine metabolism</a>                            | RT |  | 25    | 1.0E-1  | 9.2E-1    |
| <input type="checkbox"/> | KEGG_PATHWAY         | <a href="#">RNA polymerase</a>                               | RT |  | 15    | 1.4E-1  | 9.1E-1    |
| <input type="checkbox"/> | GOTERM_MF_FAT        | <a href="#">RNA polymerase activity</a>                      | RT |  | 18    | 1.4E-1  | 1.0E0     |
| <input type="checkbox"/> | GOTERM_BP_FAT        | <a href="#">transcription</a>                                | RT |  | 19    | 1.5E-1  | 1.0E0     |
| <input type="checkbox"/> | KEGG_PATHWAY         | <a href="#">Pyrimidine metabolism</a>                        | RT |  | 25    | 1.6E-1  | 8.7E-1    |
| <input type="checkbox"/> | GOTERM_MF_FAT        | <a href="#">DNA-directed RNA polymerase activity</a>         | RT |  | 17    | 1.8E-1  | 1.0E0     |
| <input type="checkbox"/> | GOTERM_MF_FAT        | <a href="#">nucleotidyltransferase activity</a>              | RT |  | 46    | 2.6E-1  | 1.0E0     |
| <input type="checkbox"/> | GOTERM_MF_FAT        | <a href="#">nucleotidyltransferase activity</a>              | RT |  | 46    | 2.6E-1  | 1.0E0     |
| <input type="checkbox"/> | SP_PIR_KEYWORDS      | <a href="#">dna-directed rna polymerase</a>                  | RT |  | 11    | 2.9E-1  | 1.0E0     |
| <input type="checkbox"/> | Annotation Cluster 3 | 0.78                                                         |    |  |       |         |           |
| <input type="checkbox"/> | INTERPRO             | <a href="#">Giardia variant-specific surface protein</a>     | RT |  | 151   | 5.1E-2  | 1.0E0     |
| <input type="checkbox"/> | INTERPRO             | <a href="#">EGF-like</a>                                     | RT |  | 119   | 1.5E-1  | 1.0E0     |
| <input type="checkbox"/> | SMART                | <a href="#">EGF</a>                                          | RT |  | 119   | 1.9E-1  | 1.0E0     |
| <input type="checkbox"/> | INTERPRO             | <a href="#">Furin-like repeat</a>                            | RT |  | 113   | 2.6E-1  | 1.0E0     |
| <input type="checkbox"/> | SMART                | <a href="#">FU</a>                                           | RT |  | 113   | 3.1E-1  | 1.0E0     |
| <input type="checkbox"/> | Annotation Cluster 4 | 0.75                                                         |    |  |       |         |           |
| <input type="checkbox"/> | GOTERM_BP_FAT        | <a href="#">cellular response to stress</a>                  | RT |  | 16    | 1.4E-1  | 1.0E0     |
| <input type="checkbox"/> | GOTERM_BP_FAT        | <a href="#">response to DNA damage stimulus</a>              | RT |  | 15    | 1.8E-1  | 1.0E0     |
| <input type="checkbox"/> | GOTERM_BP_FAT        | <a href="#">DNA repair</a>                                   | RT |  | 15    | 1.8E-1  | 1.0E0     |
| <input type="checkbox"/> | GOTERM_BP_FAT        | <a href="#">DNA metabolic process</a>                        | RT |  | 38    | 2.4E-1  | 1.0E0     |
| <input type="checkbox"/> | Annotation Cluster 5 | 0.69                                                         |    |  |       |         |           |
| <input type="checkbox"/> | INTERPRO             | <a href="#">EGF-like_type 3</a>                              | RT |  | 24    | 8.2E-2  | 1.0E0     |
| <input type="checkbox"/> | INTERPRO             | <a href="#">EGF</a>                                          | RT |  | 7     | 1.4E-1  | 1.0E0     |
| <input type="checkbox"/> | INTERPRO             | <a href="#">EGF_extracellular</a>                            | RT |  | 16    | 3.3E-1  | 1.0E0     |
| <input type="checkbox"/> | SP_PIR_KEYWORDS      | <a href="#">egf-like domain</a>                              | RT |  | 12    | 4.6E-1  | 9.9E-1    |
| <input type="checkbox"/> | Annotation Cluster 6 | 0.67                                                         |    |  |       |         |           |
| <input type="checkbox"/> | GOTERM_CC_FAT        | <a href="#">ribosome</a>                                     | RT |  | 49    | 2.5E-2  | 9.6E-1    |
| <input type="checkbox"/> | GOTERM_CC_FAT        | <a href="#">ribonucleoprotein complex</a>                    | RT |  | 60    | 8.9E-2  | 9.8E-1    |
| <input type="checkbox"/> | GOTERM_CC_FAT        | <a href="#">intracellular non-membrane-bounded organelle</a> | RT |  | 90    | 1.8E-1  | 1.0E0     |
| <input type="checkbox"/> | GOTERM_CC_FAT        | <a href="#">non-membrane-bounded organelle</a>               | RT |  | 90    | 1.8E-1  | 1.0E0     |
| <input type="checkbox"/> | GOTERM_MF_FAT        | <a href="#">structural constituent of ribosome</a>           | RT |  | 45    | 2.0E-1  | 1.0E0     |
| <input type="checkbox"/> | GOTERM_MF_FAT        | <a href="#">structural molecule activity</a>                 | RT |  | 52    | 3.0E-1  | 1.0E0     |
| <input type="checkbox"/> | SP_PIR_KEYWORDS      | <a href="#">ribosomal protein</a>                            | RT |  | 46    | 4.0E-1  | 1.0E0     |
| <input type="checkbox"/> | KEGG_PATHWAY         | <a href="#">Ribosome</a>                                     | RT |  | 43    | 6.7E-1  | 9.8E-1    |
| <input type="checkbox"/> | GOTERM_BP_FAT        | <a href="#">translation</a>                                  | RT |  | 63    | 7.1E-1  | 1.0E0     |
| <input type="checkbox"/> | Annotation Cluster 7 | 0.62                                                         |    |  |       |         |           |
| <input type="checkbox"/> | GOTERM_MF_FAT        | <a href="#">nucleoside binding</a>                           | RT |  | 326   | 5.2E-2  | 1.0E0     |
| <input type="checkbox"/> | GOTERM_MF_FAT        | <a href="#">adenyl nucleotide binding</a>                    | RT |  | 322   | 7.5E-2  | 1.0E0     |
| <input type="checkbox"/> | GOTERM_MF_FAT        | <a href="#">purine nucleoside binding</a>                    | RT |  | 322   | 7.5E-2  | 1.0E0     |
| <input type="checkbox"/> | GOTERM_MF_FAT        | <a href="#">ATP binding</a>                                  | RT |  | 317   | 9.0E-2  | 1.0E0     |
| <input type="checkbox"/> | GOTERM_MF_FAT        | <a href="#">adenyl ribonucleotide binding</a>                | RT |  | 317   | 9.0E-2  | 1.0E0     |

|                          |                       |                                                                |    |  |       |         |           |
|--------------------------|-----------------------|----------------------------------------------------------------|----|--|-------|---------|-----------|
| <input type="checkbox"/> | GOTERM_MF_FAT         | <a href="#">nucleotide binding</a>                             | RT |  | 369   | 1.1E-1  | 1.0E0     |
| <input type="checkbox"/> | GOTERM_MF_FAT         | <a href="#">purine nucleotide binding</a>                      | RT |  | 347   | 1.4E-1  | 1.0E0     |
| <input type="checkbox"/> | GOTERM_MF_FAT         | <a href="#">purine ribonucleotide binding</a>                  | RT |  | 342   | 1.6E-1  | 1.0E0     |
| <input type="checkbox"/> | GOTERM_MF_FAT         | <a href="#">ribonucleotide binding</a>                         | RT |  | 342   | 1.6E-1  | 1.0E0     |
| <input type="checkbox"/> | GOTERM_BP_FAT         | <a href="#">protein amino acid phosphorylation</a>             | RT |  | 157   | 3.7E-1  | 1.0E0     |
| <input type="checkbox"/> | GOTERM_BP_FAT         | <a href="#">phosphorylation</a>                                | RT |  | 167   | 4.2E-1  | 1.0E0     |
| <input type="checkbox"/> | SP_PIR_KEYWORDS       | <a href="#">kinase</a>                                         | RT |  | 200   | 4.8E-1  | 9.9E-1    |
| <input type="checkbox"/> | GOTERM_BP_FAT         | <a href="#">phosphate metabolic process</a>                    | RT |  | 175   | 4.8E-1  | 1.0E0     |
| <input type="checkbox"/> | GOTERM_BP_FAT         | <a href="#">phosphorus metabolic process</a>                   | RT |  | 175   | 4.8E-1  | 1.0E0     |
| <input type="checkbox"/> | INTERPRO              | <a href="#">Serine/threonine protein kinase-related</a>        | RT |  | 137   | 4.9E-1  | 1.0E0     |
| <input type="checkbox"/> | GOTERM_MF_FAT         | <a href="#">protein kinase activity</a>                        | RT |  | 157   | 5.5E-1  | 1.0E0     |
| <input type="checkbox"/> | INTERPRO              | <a href="#">Protein kinase_core</a>                            | RT |  | 155   | 5.6E-1  | 1.0E0     |
| <input type="checkbox"/> | SP_PIR_KEYWORDS       | <a href="#">atp-binding</a>                                    | RT |  | 155   | 5.6E-1  | 9.9E-1    |
| <input type="checkbox"/> | GOTERM_MF_FAT         | <a href="#">protein serine/threonine kinase activity</a>       | RT |  | 61    | 5.8E-1  | 1.0E0     |
| <input type="checkbox"/> | SP_PIR_KEYWORDS       | <a href="#">nucleotide-binding</a>                             | RT |  | 162   | 6.1E-1  | 9.9E-1    |
|                          | Annotation Cluster 8  | Enrichment Score: 0.56                                         |    |  | Count | P_Value | Benjamini |
| <input type="checkbox"/> | INTERPRO              | <a href="#">Tetratricopeptide region</a>                       | RT |  | 19    | 7.0E-2  | 1.0E0     |
| <input type="checkbox"/> | INTERPRO              | <a href="#">Tetratricopeptide repeat</a>                       | RT |  | 17    | 2.7E-1  | 1.0E0     |
| <input type="checkbox"/> | SMART                 | <a href="#">TPR</a>                                            | RT |  | 17    | 2.9E-1  | 1.0E0     |
| <input type="checkbox"/> | INTERPRO              | <a href="#">Tetratricopeptide-like helical</a>                 | RT |  | 21    | 3.0E-1  | 1.0E0     |
| <input type="checkbox"/> | INTERPRO              | <a href="#">Tetratricopeptide TPR-1</a>                        | RT |  | 14    | 3.6E-1  | 1.0E0     |
| <input type="checkbox"/> | SP_PIR_KEYWORDS       | <a href="#">tpr repeat</a>                                     | RT |  | 6     | 7.4E-1  | 9.9E-1    |
|                          | Annotation Cluster 9  | Enrichment Score: 0.49                                         |    |  | Count | P_Value | Benjamini |
| <input type="checkbox"/> | INTERPRO              | <a href="#">WD40 repeat_subgroup</a>                           | RT |  | 37    | 2.2E-1  | 1.0E0     |
| <input type="checkbox"/> | INTERPRO              | <a href="#">WD40 repeat_2</a>                                  | RT |  | 29    | 2.3E-1  | 1.0E0     |
| <input type="checkbox"/> | INTERPRO              | <a href="#">WD40 repeat_region</a>                             | RT |  | 31    | 2.7E-1  | 1.0E0     |
| <input type="checkbox"/> | INTERPRO              | <a href="#">WD40 repeat</a>                                    | RT |  | 47    | 2.9E-1  | 1.0E0     |
| <input type="checkbox"/> | SMART                 | <a href="#">WD40</a>                                           | RT |  | 47    | 3.3E-1  | 1.0E0     |
| <input type="checkbox"/> | INTERPRO              | <a href="#">WD40/YVTN repeat-like</a>                          | RT |  | 45    | 3.6E-1  | 1.0E0     |
| <input type="checkbox"/> | SP_PIR_KEYWORDS       | <a href="#">wd repeat</a>                                      | RT |  | 32    | 4.0E-1  | 1.0E0     |
| <input type="checkbox"/> | INTERPRO              | <a href="#">WD40 repeat_conserved site</a>                     | RT |  | 17    | 7.1E-1  | 1.0E0     |
|                          | Annotation Cluster 10 | Enrichment Score: 0.47                                         |    |  | Count | P_Value | Benjamini |
| <input type="checkbox"/> | GOTERM_MF_FAT         | <a href="#">peptidyl-prolyl cis-trans isomerase activity</a>   | RT |  | 7     | 2.8E-1  | 1.0E0     |
| <input type="checkbox"/> | GOTERM_MF_FAT         | <a href="#">cis-trans isomerase activity</a>                   | RT |  | 7     | 2.8E-1  | 1.0E0     |
| <input type="checkbox"/> | SP_PIR_KEYWORDS       | <a href="#">Rotamase</a>                                       | RT |  | 7     | 3.2E-1  | 1.0E0     |
| <input type="checkbox"/> | INTERPRO              | <a href="#">Peptidyl-prolyl cis-trans isomerase, FKBP-type</a> | RT |  | 5     | 5.1E-1  | 1.0E0     |
|                          | Annotation Cluster 11 | Enrichment Score: 0.46                                         |    |  | Count | P_Value | Benjamini |
| <input type="checkbox"/> | GOTERM_BP_FAT         | <a href="#">homeostatic process</a>                            | RT |  | 15    | 1.8E-1  | 1.0E0     |
| <input type="checkbox"/> | GOTERM_BP_FAT         | <a href="#">cellular homeostasis</a>                           | RT |  | 14    | 2.3E-1  | 1.0E0     |
| <input type="checkbox"/> | GOTERM_BP_FAT         | <a href="#">cell redox homeostasis</a>                         | RT |  | 13    | 2.9E-1  | 1.0E0     |
| <input type="checkbox"/> | INTERPRO              | <a href="#">Thioredoxin fold</a>                               | RT |  | 15    | 3.9E-1  | 1.0E0     |
| <input type="checkbox"/> | INTERPRO              | <a href="#">Thioredoxin-like</a>                               | RT |  | 9     | 5.3E-1  | 1.0E0     |
| <input type="checkbox"/> | INTERPRO              | <a href="#">Thioredoxin_core</a>                               | RT |  | 5     | 6.8E-1  | 1.0E0     |
|                          | Annotation Cluster 12 | Enrichment Score: 0.45                                         |    |  | Count | P_Value | Benjamini |
| <input type="checkbox"/> | INTERPRO              | <a href="#">Ankyrin</a>                                        | RT |  | 262   | 2.2E-1  | 1.0E0     |
| <input type="checkbox"/> | SMART                 | <a href="#">ANK</a>                                            | RT |  | 262   | 2.9E-1  | 1.0E0     |
| <input type="checkbox"/> | SP_PIR_KEYWORDS       | <a href="#">ank repeat</a>                                     | RT |  | 182   | 6.9E-1  | 9.9E-1    |
|                          | Annotation Cluster 13 | Enrichment Score: 0.4                                          |    |  | Count | P_Value | Benjamini |
| <input type="checkbox"/> | KEGG_PATHWAY          | <a href="#">Nucleotide excision repair</a>                     | RT |  | 13    | 2.3E-1  | 9.2E-1    |
| <input type="checkbox"/> | KEGG_PATHWAY          | <a href="#">DNA replication</a>                                | RT |  | 15    | 4.7E-1  | 9.9E-1    |
| <input type="checkbox"/> | KEGG_PATHWAY          | <a href="#">Mismatch repair</a>                                | RT |  | 10    | 5.9E-1  | 9.8E-1    |
|                          | Annotation Cluster 14 | Enrichment Score: 0.36                                         |    |  | Count | P_Value | Benjamini |
| <input type="checkbox"/> | GOTERM_CC_FAT         | <a href="#">cytosolic part</a>                                 | RT |  | 7     | 3.2E-1  | 1.0E0     |
| <input type="checkbox"/> | GOTERM_CC_FAT         | <a href="#">prefoldin complex</a>                              | RT |  | 5     | 4.1E-1  | 1.0E0     |
| <input type="checkbox"/> | INTERPRO              | <a href="#">Prefoldin alpha-like</a>                           | RT |  | 3     | 6.2E-1  | 1.0E0     |
|                          | Annotation Cluster 15 | Enrichment Score: 0.35                                         |    |  | Count | P_Value | Benjamini |
| <input type="checkbox"/> | GOTERM_CC_FAT         | <a href="#">cytosol</a>                                        | RT |  | 21    | 5.8E-2  | 9.8E-1    |
| <input type="checkbox"/> | GOTERM_CC_FAT         | <a href="#">proteasome complex</a>                             | RT |  | 14    | 2.8E-1  | 1.0E0     |

| <input type="checkbox"/> |                       |                                                                            |                        |  | Count | P_Value | Benjamini               |
|--------------------------|-----------------------|----------------------------------------------------------------------------|------------------------|--|-------|---------|-------------------------|
| <input type="checkbox"/> | GOTERM_CC_FAT         | <a href="#">proteasome core complex</a>                                    | RT                     |  | 10    | 2.9E-1  | 1.0E0                   |
| <input type="checkbox"/> | INTERPRO              | <a href="#">Proteasome_alpha-subunit_conserved_site</a>                    | RT                     |  | 6     | 3.8E-1  | 1.0E0                   |
| <input type="checkbox"/> | GOTERM_BP_FAT         | <a href="#">ubiquitin-dependent protein catabolic process</a>              | RT                     |  | 10    | 4.0E-1  | 1.0E0                   |
| <input type="checkbox"/> | GOTERM_MF_FAT         | <a href="#">threonine-type peptidase activity</a>                          | RT                     |  | 10    | 4.3E-1  | 1.0E0                   |
| <input type="checkbox"/> | GOTERM_MF_FAT         | <a href="#">threonine-type endopeptidase activity</a>                      | RT                     |  | 10    | 4.3E-1  | 1.0E0                   |
| <input type="checkbox"/> | SP_PIR_KEYWORDS       | <a href="#">proteasome</a>                                                 | RT                     |  | 14    | 4.3E-1  | 1.0E0                   |
| <input type="checkbox"/> | INTERPRO              | <a href="#">Proteasome_subunit_alpha/beta</a>                              | RT                     |  | 10    | 4.3E-1  | 1.0E0                   |
| <input type="checkbox"/> | GOTERM_BP_FAT         | <a href="#">cellular macromolecule catabolic process</a>                   | RT                     |  | 21    | 5.0E-1  | 1.0E0                   |
| <input type="checkbox"/> | PIR_SUPERFAMILY       | PIRSF001212: multicatalytic endopeptidase complex chain C9                 | RT                     |  | 5     | 5.1E-1  | 1.0E0                   |
| <input type="checkbox"/> | INTERPRO              | <a href="#">Proteasome_alpha_and_beta_subunits</a>                         | RT                     |  | 9     | 5.3E-1  | 1.0E0                   |
| <input type="checkbox"/> | KEGG_PATHWAY          | <a href="#">Proteasome</a>                                                 | RT                     |  | 19    | 5.4E-1  | 9.7E-1                  |
| <input type="checkbox"/> | GOTERM_BP_FAT         | <a href="#">proteolysis involved in cellular protein catabolic process</a> | RT                     |  | 20    | 5.6E-1  | 1.0E0                   |
| <input type="checkbox"/> | GOTERM_BP_FAT         | <a href="#">cellular protein catabolic process</a>                         | RT                     |  | 20    | 5.6E-1  | 1.0E0                   |
| <input type="checkbox"/> | GOTERM_BP_FAT         | <a href="#">modification-dependent protein catabolic process</a>           | RT                     |  | 16    | 5.7E-1  | 1.0E0                   |
| <input type="checkbox"/> | GOTERM_BP_FAT         | <a href="#">modification-dependent macromolecule catabolic process</a>     | RT                     |  | 16    | 5.7E-1  | 1.0E0                   |
| <input type="checkbox"/> | GOTERM_BP_FAT         | <a href="#">macromolecule catabolic process</a>                            | RT                     |  | 22    | 7.3E-1  | 1.0E0                   |
| <input type="checkbox"/> | GOTERM_BP_FAT         | <a href="#">protein catabolic process</a>                                  | RT                     |  | 21    | 7.8E-1  | 1.0E0                   |
| <input type="checkbox"/> | SP_PIR_KEYWORDS       | <a href="#">threonine protease</a>                                         | RT                     |  | 4     | 8.3E-1  | 9.9E-1                  |
|                          | Annotation Cluster 16 |                                                                            | Enrichment Score: 0.34 |  |       |         | Count P_Value Benjamini |
| <input type="checkbox"/> | GOTERM_MF_FAT         | <a href="#">endopeptidase activity</a>                                     | RT                     |  | 30    | 3.0E-1  | 1.0E0                   |
| <input type="checkbox"/> | GOTERM_MF_FAT         | <a href="#">cysteine-type peptidase activity</a>                           | RT                     |  | 20    | 3.5E-1  | 1.0E0                   |
| <input type="checkbox"/> | INTERPRO              | <a href="#">Peptidase_cysteine_peptidase_active_site</a>                   | RT                     |  | 20    | 3.6E-1  | 1.0E0                   |
| <input type="checkbox"/> | INTERPRO              | <a href="#">Peptidase C1A_papain</a>                                       | RT                     |  | 18    | 3.9E-1  | 1.0E0                   |
| <input type="checkbox"/> | INTERPRO              | <a href="#">Peptidase C1A_papain C-terminal</a>                            | RT                     |  | 18    | 3.9E-1  | 1.0E0                   |
| <input type="checkbox"/> | SMART                 | <a href="#">Pept_C1</a>                                                    | RT                     |  | 18    | 4.1E-1  | 1.0E0                   |
| <input type="checkbox"/> | GOTERM_MF_FAT         | <a href="#">cysteine-type endopeptidase activity</a>                       | RT                     |  | 16    | 4.1E-1  | 1.0E0                   |
| <input type="checkbox"/> | GOTERM_BP_FAT         | <a href="#">proteolysis</a>                                                | RT                     |  | 51    | 5.9E-1  | 1.0E0                   |
| <input type="checkbox"/> | GOTERM_MF_FAT         | <a href="#">peptidase activity acting on L-amino acid peptides</a>         | RT                     |  | 40    | 6.0E-1  | 1.0E0                   |
| <input type="checkbox"/> | GOTERM_MF_FAT         | <a href="#">peptidase activity</a>                                         | RT                     |  | 46    | 6.3E-1  | 1.0E0                   |
| <input type="checkbox"/> | SP_PIR_KEYWORDS       | <a href="#">thiol protease</a>                                             | RT                     |  | 7     | 6.4E-1  | 9.9E-1                  |
| <input type="checkbox"/> | SP_PIR_KEYWORDS       | <a href="#">Protease</a>                                                   | RT                     |  | 22    | 6.7E-1  | 9.8E-1                  |
|                          | Annotation Cluster 17 |                                                                            | Enrichment Score: 0.31 |  |       |         | Count P_Value Benjamini |
| <input type="checkbox"/> | COG_ONTOLOGY          | <a href="#">Lipid metabolism</a>                                           | RT                     |  | 11    | 1.5E-1  | 1.0E0                   |
| <input type="checkbox"/> | GOTERM_MF_FAT         | <a href="#">ligase activity forming carbon-sulfur bonds</a>                | RT                     |  | 4     | 6.5E-1  | 1.0E0                   |
| <input type="checkbox"/> | GOTERM_MF_FAT         | <a href="#">fatty-acid ligase activity</a>                                 | RT                     |  | 4     | 6.5E-1  | 1.0E0                   |
| <input type="checkbox"/> | GOTERM_MF_FAT         | <a href="#">long-chain-fatty-acid-CoA ligase activity</a>                  | RT                     |  | 4     | 6.5E-1  | 1.0E0                   |
| <input type="checkbox"/> | INTERPRO              | <a href="#">AMP-dependent synthetase and ligase</a>                        | RT                     |  | 5     | 6.8E-1  | 1.0E0                   |
|                          | Annotation Cluster 18 |                                                                            | Enrichment Score: 0.31 |  |       |         | Count P_Value Benjamini |
| <input type="checkbox"/> | INTERPRO              | <a href="#">Amino acid transporter_transmembrane</a>                       | RT                     |  | 8     | 3.4E-1  | 1.0E0                   |
| <input type="checkbox"/> | GOTERM_CC_FAT         | <a href="#">intrinsic to membrane</a>                                      | RT                     |  | 37    | 4.7E-1  | 1.0E0                   |
| <input type="checkbox"/> | GOTERM_CC_FAT         | <a href="#">integral to membrane</a>                                       | RT                     |  | 37    | 4.7E-1  | 1.0E0                   |
| <input type="checkbox"/> | SP_PIR_KEYWORDS       | <a href="#">transmembrane</a>                                              | RT                     |  | 19    | 6.0E-1  | 9.9E-1                  |
| <input type="checkbox"/> | SP_PIR_KEYWORDS       | <a href="#">membrane</a>                                                   | RT                     |  | 17    | 6.3E-1  | 9.9E-1                  |
|                          | Annotation Cluster 19 |                                                                            | Enrichment Score: 0.3  |  |       |         | Count P_Value Benjamini |
| <input type="checkbox"/> | SP_PIR_KEYWORDS       | <a href="#">cytoplasm</a>                                                  | RT                     |  | 14    | 2.2E-1  | 1.0E0                   |
| <input type="checkbox"/> | GOTERM_MF_FAT         | <a href="#">unfolded protein binding</a>                                   | RT                     |  | 15    | 2.9E-1  | 1.0E0                   |
| <input type="checkbox"/> | PIR_SUPERFAMILY       | PIRSF002584: molecular chaperone 1-complex-type                            | RT                     |  | 6     | 5.5E-1  | 1.0E0                   |
| <input type="checkbox"/> | INTERPRO              | <a href="#">Chaperone_tailless_complex_polypeptide_1</a>                   | RT                     |  | 6     | 5.6E-1  | 1.0E0                   |
| <input type="checkbox"/> | INTERPRO              | <a href="#">Chaperonin TCP-1_conserved_site</a>                            | RT                     |  | 6     | 7.0E-1  | 1.0E0                   |
| <input type="checkbox"/> | INTERPRO              | <a href="#">Chaperonin Cpn60/TCP-1</a>                                     | RT                     |  | 6     | 7.0E-1  | 1.0E0                   |
| <input type="checkbox"/> | SP_PIR_KEYWORDS       | <a href="#">Chaperone</a>                                                  | RT                     |  | 7     | 8.5E-1  | 9.9E-1                  |
|                          | Annotation Cluster 20 |                                                                            | Enrichment Score: 0.3  |  |       |         | Count P_Value Benjamini |
| <input type="checkbox"/> | COG_ONTOLOGY          | <a href="#">Nucleotide transport and metabolism</a>                        | RT                     |  | 7     | 2.9E-1  | 9.8E-1                  |
| <input type="checkbox"/> | GOTERM_BP_FAT         | <a href="#">nucleotide catabolic process</a>                               | RT                     |  | 4     | 4.3E-1  | 1.0E0                   |
| <input type="checkbox"/> | GOTERM_BP_FAT         | <a href="#">nucleobase_nucleoside and nucleotide catabolic process</a>     | RT                     |  | 5     | 4.9E-1  | 1.0E0                   |
| <input type="checkbox"/> | GOTERM_BP_FAT         | <a href="#">nitrogen compound catabolic process</a>                        | RT                     |  | 5     | 4.9E-1  | 1.0E0                   |

| <input type="checkbox"/> | Annotation      | Enrichment Score                                                                                    | Count | P-Value | Benjamini |
|--------------------------|-----------------|-----------------------------------------------------------------------------------------------------|-------|---------|-----------|
| <input type="checkbox"/> | GOTERM_BP_FAT   | <a href="#">nucleobase, nucleoside, nucleotide and nucleic acid catabolic process</a>               | 5     | 4.9E-1  | 1.0E0     |
| <input type="checkbox"/> | PIR_SUPERFAMILY | PIRSF017316:Pesterase_C1039                                                                         | 3     | 6.2E-1  | 1.0E0     |
| <input type="checkbox"/> | PIR_SUPERFAMILY | PIRSF017316:phosphoesterase, C1039.02 type                                                          | 3     | 6.2E-1  | 1.0E0     |
| <input type="checkbox"/> | INTERPRO        | <a href="#">5'-Nucleotidase and apyrase</a>                                                         | 3     | 6.2E-1  | 1.0E0     |
| <input type="checkbox"/> | INTERPRO        | <a href="#">Predicted phosphoesterase, C1039.02 type</a>                                            | 3     | 6.2E-1  | 1.0E0     |
| Annotation Cluster 21    |                 | Enrichment Score: 0.29                                                                              |       |         |           |
| <input type="checkbox"/> | SP_PIR_KEYWORDS | <a href="#">zinc-finger</a>                                                                         | 41    | 2.4E-1  | 1.0E0     |
| <input type="checkbox"/> | INTERPRO        | <a href="#">Zinc finger, RING-type</a>                                                              | 43    | 2.7E-1  | 1.0E0     |
| <input type="checkbox"/> | SMART           | <a href="#">RING</a>                                                                                | 43    | 3.1E-1  | 1.0E0     |
| <input type="checkbox"/> | INTERPRO        | <a href="#">Zinc finger, C3HC4 RING-type</a>                                                        | 23    | 3.6E-1  | 1.0E0     |
| <input type="checkbox"/> | SP_PIR_KEYWORDS | <a href="#">zinc</a>                                                                                | 51    | 6.1E-1  | 9.9E-1    |
| <input type="checkbox"/> | GOTERM_MF_FAT   | <a href="#">cation binding</a>                                                                      | 148   | 6.6E-1  | 1.0E0     |
| <input type="checkbox"/> | GOTERM_MF_FAT   | <a href="#">ion binding</a>                                                                         | 148   | 6.6E-1  | 1.0E0     |
| <input type="checkbox"/> | GOTERM_MF_FAT   | <a href="#">metal ion binding</a>                                                                   | 146   | 6.7E-1  | 1.0E0     |
| <input type="checkbox"/> | SP_PIR_KEYWORDS | <a href="#">metal-binding</a>                                                                       | 59    | 7.3E-1  | 9.9E-1    |
| <input type="checkbox"/> | GOTERM_MF_FAT   | <a href="#">zinc ion binding</a>                                                                    | 85    | 7.7E-1  | 1.0E0     |
| <input type="checkbox"/> | GOTERM_MF_FAT   | <a href="#">transition metal ion binding</a>                                                        | 105   | 7.9E-1  | 1.0E0     |
| Annotation Cluster 22    |                 | Enrichment Score: 0.29                                                                              |       |         |           |
| <input type="checkbox"/> | INTERPRO        | <a href="#">DEAD-like helicase, N-terminal</a>                                                      | 28    | 3.3E-1  | 1.0E0     |
| <input type="checkbox"/> | GOTERM_MF_FAT   | <a href="#">ATPase activity</a>                                                                     | 58    | 3.4E-1  | 1.0E0     |
| <input type="checkbox"/> | SMART           | <a href="#">DEXDc</a>                                                                               | 28    | 3.6E-1  | 1.0E0     |
| <input type="checkbox"/> | GOTERM_MF_FAT   | <a href="#">helicase activity</a>                                                                   | 34    | 3.8E-1  | 1.0E0     |
| <input type="checkbox"/> | INTERPRO        | <a href="#">Helicase, superfamily 1 and 2, ATP-binding</a>                                          | 27    | 4.5E-1  | 1.0E0     |
| <input type="checkbox"/> | GOTERM_MF_FAT   | <a href="#">ATPase activity, coupled</a>                                                            | 42    | 5.2E-1  | 1.0E0     |
| <input type="checkbox"/> | INTERPRO        | <a href="#">DNA/RNA helicase, C-terminal</a>                                                        | 27    | 5.2E-1  | 1.0E0     |
| <input type="checkbox"/> | SMART           | <a href="#">HELICc</a>                                                                              | 27    | 5.6E-1  | 1.0E0     |
| <input type="checkbox"/> | GOTERM_MF_FAT   | <a href="#">purine NTP-dependent helicase activity</a>                                              | 23    | 5.8E-1  | 1.0E0     |
| <input type="checkbox"/> | GOTERM_MF_FAT   | <a href="#">ATP-dependent helicase activity</a>                                                     | 23    | 5.8E-1  | 1.0E0     |
| <input type="checkbox"/> | INTERPRO        | <a href="#">DNA/RNA helicase, DEAD/DEAH box type, N-terminal</a>                                    | 18    | 6.5E-1  | 1.0E0     |
| <input type="checkbox"/> | SP_PIR_KEYWORDS | <a href="#">helicase</a>                                                                            | 26    | 7.4E-1  | 9.9E-1    |
| <input type="checkbox"/> | INTERPRO        | <a href="#">RNA helicase, DEAD-box type, Q motif</a>                                                | 8     | 9.5E-1  | 1.0E0     |
| Annotation Cluster 23    |                 | Enrichment Score: 0.27                                                                              |       |         |           |
| <input type="checkbox"/> | INTERPRO        | <a href="#">Metallophosphoesterase</a>                                                              | 16    | 1.6E-1  | 1.0E0     |
| <input type="checkbox"/> | GOTERM_MF_FAT   | <a href="#">phosphatase activity</a>                                                                | 28    | 3.9E-1  | 1.0E0     |
| <input type="checkbox"/> | INTERPRO        | <a href="#">Serine/threonine-specific protein phosphatase and bis(5-nucleosyl)-tetraphosphatase</a> | 10    | 5.6E-1  | 1.0E0     |
| <input type="checkbox"/> | SMART           | <a href="#">PP2Ac</a>                                                                               | 10    | 5.8E-1  | 1.0E0     |
| <input type="checkbox"/> | GOTERM_MF_FAT   | <a href="#">iron ion binding</a>                                                                    | 19    | 5.8E-1  | 1.0E0     |
| <input type="checkbox"/> | SP_PIR_KEYWORDS | <a href="#">iron</a>                                                                                | 12    | 7.7E-1  | 9.8E-1    |
| <input type="checkbox"/> | GOTERM_MF_FAT   | <a href="#">phosphoprotein phosphatase activity</a>                                                 | 15    | 8.6E-1  | 1.0E0     |
| <input type="checkbox"/> | PIR_SUPERFAMILY | PIRSF000908:serine/threonine-protein phosphatase, conventional type                                 | 4     | 9.4E-1  | 1.0E0     |
| Annotation Cluster 24    |                 | Enrichment Score: 0.27                                                                              |       |         |           |
| <input type="checkbox"/> | INTERPRO        | <a href="#">Aminotransferase, class I and II</a>                                                    | 5     | 3.1E-1  | 1.0E0     |
| <input type="checkbox"/> | GOTERM_MF_FAT   | <a href="#">vitamin B6 binding</a>                                                                  | 8     | 3.4E-1  | 1.0E0     |
| <input type="checkbox"/> | GOTERM_MF_FAT   | <a href="#">pyridoxal phosphate binding</a>                                                         | 8     | 3.4E-1  | 1.0E0     |
| <input type="checkbox"/> | GOTERM_MF_FAT   | <a href="#">vitamin binding</a>                                                                     | 8     | 4.8E-1  | 1.0E0     |
| <input type="checkbox"/> | INTERPRO        | <a href="#">Pyridoxal phosphate-dependent transferase, major region, subdomain 1</a>                | 6     | 5.6E-1  | 1.0E0     |
| <input type="checkbox"/> | INTERPRO        | <a href="#">Pyridoxal phosphate-dependent transferase, major region, subdomain 2</a>                | 3     | 6.2E-1  | 1.0E0     |
| <input type="checkbox"/> | GOTERM_MF_FAT   | <a href="#">transferase activity, transferring nitrogenous groups</a>                               | 5     | 6.7E-1  | 1.0E0     |
| <input type="checkbox"/> | KEGG_PATHWAY    | <a href="#">Alanine, aspartate and glutamate metabolism</a>                                         | 3     | 6.9E-1  | 9.8E-1    |
| <input type="checkbox"/> | GOTERM_MF_FAT   | <a href="#">transaminase activity</a>                                                               | 3     | 9.0E-1  | 1.0E0     |
| <input type="checkbox"/> | SP_PIR_KEYWORDS | <a href="#">Aminotransferase</a>                                                                    | 3     | 9.2E-1  | 1.0E0     |
| Annotation Cluster 25    |                 | Enrichment Score: 0.26                                                                              |       |         |           |
| <input type="checkbox"/> | GOTERM_BP_FAT   | <a href="#">monosaccharide metabolic process</a>                                                    | 16    | 2.9E-1  | 1.0E0     |
| <input type="checkbox"/> | GOTERM_BP_FAT   | <a href="#">generation of precursor metabolites and energy</a>                                      | 17    | 4.1E-1  | 1.0E0     |
| <input type="checkbox"/> | GOTERM_BP_FAT   | <a href="#">glycolysis</a>                                                                          | 8     | 4.6E-1  | 1.0E0     |

| <input type="checkbox"/> | Term            | GO Term                                                                  | RT | Count | P-Value | Benjamini |
|--------------------------|-----------------|--------------------------------------------------------------------------|----|-------|---------|-----------|
| <input type="checkbox"/> | GOTERM_BP_FAT   | <a href="#">glucose metabolic process</a>                                | RT | 13    | 5.0E-1  | 1.0E0     |
| <input type="checkbox"/> | GOTERM_BP_FAT   | <a href="#">hexose metabolic process</a>                                 | RT | 13    | 5.0E-1  | 1.0E0     |
| <input type="checkbox"/> | SP_PIR_KEYWORDS | <a href="#">glycolysis</a>                                               | RT | 5     | 5.5E-1  | 9.9E-1    |
| <input type="checkbox"/> | GOTERM_BP_FAT   | <a href="#">cellular carbohydrate catabolic process</a>                  | RT | 9     | 6.2E-1  | 1.0E0     |
| <input type="checkbox"/> | GOTERM_BP_FAT   | <a href="#">carbohydrate catabolic process</a>                           | RT | 9     | 6.2E-1  | 1.0E0     |
| <input type="checkbox"/> | GOTERM_BP_FAT   | <a href="#">glucose catabolic process</a>                                | RT | 9     | 6.2E-1  | 1.0E0     |
| <input type="checkbox"/> | GOTERM_BP_FAT   | <a href="#">hexose catabolic process</a>                                 | RT | 9     | 6.2E-1  | 1.0E0     |
| <input type="checkbox"/> | GOTERM_BP_FAT   | <a href="#">monosaccharide catabolic process</a>                         | RT | 9     | 6.2E-1  | 1.0E0     |
| <input type="checkbox"/> | GOTERM_BP_FAT   | <a href="#">alcohol catabolic process</a>                                | RT | 9     | 6.2E-1  | 1.0E0     |
| <input type="checkbox"/> | KEGG_PATHWAY    | <a href="#">Glycolysis / Gluconeogenesis</a>                             | RT | 3     | 9.9E-1  | 1.0E0     |
| Annotation Cluster 26    |                 | Enrichment Score: 0.26                                                   |    | Count | P-Value | Benjamini |
| <input type="checkbox"/> | SP_PIR_KEYWORDS | <a href="#">Transcription</a>                                            | RT | 7     | 3.2E-1  | 1.0E0     |
| <input type="checkbox"/> | GOTERM_MF_FAT   | <a href="#">ribonucleoside binding</a>                                   | RT | 4     | 4.4E-1  | 1.0E0     |
| <input type="checkbox"/> | INTERPRO        | <a href="#">RNA polymerase Rpb2, domain 3</a>                            | RT | 3     | 6.2E-1  | 1.0E0     |
| <input type="checkbox"/> | INTERPRO        | <a href="#">RNA polymerase, beta subunit, protrusion</a>                 | RT | 3     | 6.2E-1  | 1.0E0     |
| <input type="checkbox"/> | INTERPRO        | <a href="#">RNA polymerase, beta subunit, conserved site</a>             | RT | 3     | 6.2E-1  | 1.0E0     |
| <input type="checkbox"/> | INTERPRO        | <a href="#">DNA-directed RNA polymerase, subunit 2, domain 6</a>         | RT | 3     | 6.2E-1  | 1.0E0     |
| <input type="checkbox"/> | INTERPRO        | <a href="#">RNA polymerase Rpb2, domain 7</a>                            | RT | 3     | 6.2E-1  | 1.0E0     |
| <input type="checkbox"/> | INTERPRO        | <a href="#">DNA-directed RNA polymerase, subunit 2</a>                   | RT | 3     | 6.2E-1  | 1.0E0     |
| Annotation Cluster 27    |                 | Enrichment Score: 0.24                                                   |    | Count | P-Value | Benjamini |
| <input type="checkbox"/> | INTERPRO        | <a href="#">Kinesin, motor region, conserved site</a>                    | RT | 14    | 1.7E-1  | 1.0E0     |
| <input type="checkbox"/> | GOTERM_CC_FAT   | <a href="#">microtubule</a>                                              | RT | 19    | 5.2E-1  | 1.0E0     |
| <input type="checkbox"/> | GOTERM_CC_FAT   | <a href="#">microtubule cytoskeleton</a>                                 | RT | 29    | 5.3E-1  | 1.0E0     |
| <input type="checkbox"/> | GOTERM_CC_FAT   | <a href="#">cytoskeletal part</a>                                        | RT | 29    | 5.3E-1  | 1.0E0     |
| <input type="checkbox"/> | GOTERM_MF_FAT   | <a href="#">microtubule motor activity</a>                               | RT | 25    | 6.2E-1  | 1.0E0     |
| <input type="checkbox"/> | GOTERM_MF_FAT   | <a href="#">motor activity</a>                                           | RT | 25    | 6.2E-1  | 1.0E0     |
| <input type="checkbox"/> | INTERPRO        | <a href="#">Kinesin, motor region</a>                                    | RT | 17    | 6.3E-1  | 1.0E0     |
| <input type="checkbox"/> | SMART           | <a href="#">KISc</a>                                                     | RT | 17    | 6.5E-1  | 1.0E0     |
| <input type="checkbox"/> | GOTERM_CC_FAT   | <a href="#">cytoskeleton</a>                                             | RT | 29    | 6.6E-1  | 1.0E0     |
| <input type="checkbox"/> | SP_PIR_KEYWORDS | <a href="#">motor protein</a>                                            | RT | 15    | 6.7E-1  | 9.9E-1    |
| <input type="checkbox"/> | GOTERM_BP_FAT   | <a href="#">microtubule-based movement</a>                               | RT | 27    | 6.7E-1  | 1.0E0     |
| <input type="checkbox"/> | SP_PIR_KEYWORDS | <a href="#">microtubule</a>                                              | RT | 19    | 7.5E-1  | 9.8E-1    |
| <input type="checkbox"/> | GOTERM_BP_FAT   | <a href="#">microtubule-based process</a>                                | RT | 30    | 7.6E-1  | 1.0E0     |
| Annotation Cluster 28    |                 | Enrichment Score: 0.24                                                   |    | Count | P-Value | Benjamini |
| <input type="checkbox"/> | INTERPRO        | <a href="#">DNA-directed DNA polymerase, family B, conserved region2</a> | RT | 4     | 4.5E-1  | 1.0E0     |
| <input type="checkbox"/> | INTERPRO        | <a href="#">DNA-directed DNA polymerase, family B, conserved site</a>    | RT | 4     | 4.5E-1  | 1.0E0     |
| <input type="checkbox"/> | GOTERM_MF_FAT   | <a href="#">DNA-directed DNA polymerase activity</a>                     | RT | 7     | 5.9E-1  | 1.0E0     |
| <input type="checkbox"/> | SP_PIR_KEYWORDS | <a href="#">dna replication</a>                                          | RT | 7     | 6.4E-1  | 9.9E-1    |
| <input type="checkbox"/> | INTERPRO        | <a href="#">DNA-directed DNA polymerase, family B</a>                    | RT | 4     | 6.5E-1  | 1.0E0     |
| <input type="checkbox"/> | SMART           | <a href="#">POLBc</a>                                                    | RT | 4     | 6.6E-1  | 1.0E0     |
| <input type="checkbox"/> | SP_PIR_KEYWORDS | <a href="#">dna-directed dna polymerase</a>                              | RT | 4     | 6.9E-1  | 9.8E-1    |
| Annotation Cluster 29    |                 | Enrichment Score: 0.22                                                   |    | Count | P-Value | Benjamini |
| <input type="checkbox"/> | SP_PIR_KEYWORDS | <a href="#">cyclin</a>                                                   | RT | 9     | 1.7E-1  | 1.0E0     |
| <input type="checkbox"/> | INTERPRO        | <a href="#">Cyclin, N-terminal</a>                                       | RT | 5     | 5.1E-1  | 1.0E0     |
| <input type="checkbox"/> | INTERPRO        | <a href="#">Cyclin-related</a>                                           | RT | 4     | 8.0E-1  | 1.0E0     |
| <input type="checkbox"/> | INTERPRO        | <a href="#">Cyclin, C-terminal</a>                                       | RT | 3     | 8.0E-1  | 1.0E0     |
| <input type="checkbox"/> | INTERPRO        | <a href="#">Cyclin</a>                                                   | RT | 3     | 9.0E-1  | 1.0E0     |
| <input type="checkbox"/> | SMART           | <a href="#">CYCLIN</a>                                                   | RT | 3     | 9.1E-1  | 1.0E0     |
| Annotation Cluster 30    |                 | Enrichment Score: 0.22                                                   |    | Count | P-Value | Benjamini |
| <input type="checkbox"/> | GOTERM_CC_FAT   | <a href="#">organelle membrane</a>                                       | RT | 8     | 3.5E-1  | 1.0E0     |
| <input type="checkbox"/> | GOTERM_CC_FAT   | <a href="#">endoplasmic reticulum part</a>                               | RT | 3     | 5.5E-1  | 1.0E0     |
| <input type="checkbox"/> | GOTERM_CC_FAT   | <a href="#">nuclear envelope-endoplasmic reticulum network</a>           | RT | 3     | 5.5E-1  | 1.0E0     |
| <input type="checkbox"/> | GOTERM_CC_FAT   | <a href="#">endoplasmic reticulum membrane</a>                           | RT | 3     | 5.5E-1  | 1.0E0     |
| <input type="checkbox"/> | GOTERM_CC_FAT   | <a href="#">endomembrane system</a>                                      | RT | 8     | 8.5E-1  | 1.0E0     |
| <input type="checkbox"/> | GOTERM_CC_FAT   | <a href="#">endoplasmic reticulum</a>                                    | RT | 3     | 9.2E-1  | 1.0E0     |
| Annotation Cluster 31    |                 | Enrichment Score: 0.22                                                   |    | Count | P-Value | Benjamini |
| <input type="checkbox"/> | GOTERM_MF_FAT   | <a href="#">magnesium ion binding</a>                                    | RT | 11    | 3.5E-1  | 1.0E0     |

|                          |                       |                                                                                                       |    |  |       |         |           |
|--------------------------|-----------------------|-------------------------------------------------------------------------------------------------------|----|--|-------|---------|-----------|
| <input type="checkbox"/> | GOTERM_BP_FAT         | <a href="#">phospholipid transport</a>                                                                | RT |  | 4     | 4.3E-1  | 1.0E0     |
| <input type="checkbox"/> | INTERPRO              | <a href="#">ATPase, P-type, phospholipid-translocating, flippase</a>                                  | RT |  | 4     | 4.5E-1  | 1.0E0     |
| <input type="checkbox"/> | INTERPRO              | <a href="#">ATPase, P-type phosphorylation site</a>                                                   | RT |  | 6     | 5.6E-1  | 1.0E0     |
| <input type="checkbox"/> | GOTERM_BP_FAT         | <a href="#">lipid transport</a>                                                                       | RT |  | 4     | 6.4E-1  | 1.0E0     |
| <input type="checkbox"/> | GOTERM_BP_FAT         | <a href="#">lipid localization</a>                                                                    | RT |  | 4     | 6.4E-1  | 1.0E0     |
| <input type="checkbox"/> | GOTERM_MF_FAT         | <a href="#">phospholipid transporter activity</a>                                                     | RT |  | 4     | 6.5E-1  | 1.0E0     |
| <input type="checkbox"/> | GOTERM_MF_FAT         | <a href="#">phospholipid-translocating ATPase activity</a>                                            | RT |  | 4     | 6.5E-1  | 1.0E0     |
| <input type="checkbox"/> | GOTERM_MF_FAT         | <a href="#">aminophospholipid transporter activity</a>                                                | RT |  | 4     | 6.5E-1  | 1.0E0     |
| <input type="checkbox"/> | INTERPRO              | <a href="#">ATPase, P-type, ATPase-associated region</a>                                              | RT |  | 7     | 7.2E-1  | 1.0E0     |
| <input type="checkbox"/> | GOTERM_MF_FAT         | <a href="#">lipid transporter activity</a>                                                            | RT |  | 4     | 7.9E-1  | 1.0E0     |
| <input type="checkbox"/> | GOTERM_MF_FAT         | <a href="#">ATPase activity, coupled to transmembrane movement of ions, phosphorylative mechanism</a> | RT |  | 7     | 8.1E-1  | 1.0E0     |
| <input type="checkbox"/> | INTERPRO              | <a href="#">ATPase, P-type, K/Mg/Cd/Cu/Zn/Na/Ca/Na/H-transporter</a>                                  | RT |  | 7     | 8.1E-1  | 1.0E0     |
|                          | Annotation Cluster 32 | Enrichment Score: 0.21                                                                                |    |  | Count | P_Value | Benjamini |
| <input type="checkbox"/> | INTERPRO              | <a href="#">Haloacid dehalogenase-like hydrolase</a>                                                  | RT |  | 7     | 5.9E-1  | 1.0E0     |
| <input type="checkbox"/> | GOTERM_MF_FAT         | <a href="#">phosphoglycolate phosphatase activity</a>                                                 | RT |  | 3     | 6.2E-1  | 1.0E0     |
| <input type="checkbox"/> | INTERPRO              | <a href="#">HAD-superfamily hydrolase, subfamily IA, variant 1</a>                                    | RT |  | 3     | 6.2E-1  | 1.0E0     |
|                          | Annotation Cluster 33 | Enrichment Score: 0.2                                                                                 |    |  | Count | P_Value | Benjamini |
| <input type="checkbox"/> | GOTERM_BP_FAT         | <a href="#">lipid biosynthetic process</a>                                                            | RT |  | 10    | 4.0E-1  | 1.0E0     |
| <input type="checkbox"/> | GOTERM_BP_FAT         | <a href="#">isoprenoid biosynthetic process</a>                                                       | RT |  | 4     | 6.4E-1  | 1.0E0     |
| <input type="checkbox"/> | GOTERM_BP_FAT         | <a href="#">isoprenoid metabolic process</a>                                                          | RT |  | 4     | 6.4E-1  | 1.0E0     |
| <input type="checkbox"/> | KEGG_PATHWAY          | <a href="#">Terpenoid backbone biosynthesis</a>                                                       | RT |  | 3     | 9.7E-1  | 1.0E0     |
|                          | Annotation Cluster 34 | Enrichment Score: 0.2                                                                                 |    |  | Count | P_Value | Benjamini |
| <input type="checkbox"/> | GOTERM_MF_FAT         | <a href="#">nucleobase, nucleoside, nucleotide kinase activity</a>                                    | RT |  | 7     | 5.9E-1  | 1.0E0     |
| <input type="checkbox"/> | GOTERM_MF_FAT         | <a href="#">nucleotide kinase activity</a>                                                            | RT |  | 4     | 6.5E-1  | 1.0E0     |
| <input type="checkbox"/> | GOTERM_MF_FAT         | <a href="#">phosphotransferase activity, phosphate group as acceptor</a>                              | RT |  | 5     | 6.7E-1  | 1.0E0     |
|                          | Annotation Cluster 35 | Enrichment Score: 0.2                                                                                 |    |  | Count | P_Value | Benjamini |
| <input type="checkbox"/> | GOTERM_BP_FAT         | <a href="#">phospholipid biosynthetic process</a>                                                     | RT |  | 6     | 3.6E-1  | 1.0E0     |
| <input type="checkbox"/> | GOTERM_BP_FAT         | <a href="#">lipid biosynthetic process</a>                                                            | RT |  | 10    | 4.0E-1  | 1.0E0     |
| <input type="checkbox"/> | GOTERM_BP_FAT         | <a href="#">organophosphate metabolic process</a>                                                     | RT |  | 9     | 5.0E-1  | 1.0E0     |
| <input type="checkbox"/> | GOTERM_BP_FAT         | <a href="#">phospholipid metabolic process</a>                                                        | RT |  | 8     | 5.9E-1  | 1.0E0     |
| <input type="checkbox"/> | GOTERM_BP_FAT         | <a href="#">phosphoinositide metabolic process</a>                                                    | RT |  | 4     | 8.8E-1  | 1.0E0     |
| <input type="checkbox"/> | GOTERM_BP_FAT         | <a href="#">glycerolipid metabolic process</a>                                                        | RT |  | 4     | 8.8E-1  | 1.0E0     |
| <input type="checkbox"/> | GOTERM_BP_FAT         | <a href="#">glycerophospholipid metabolic process</a>                                                 | RT |  | 4     | 8.8E-1  | 1.0E0     |
| <input type="checkbox"/> | KEGG_PATHWAY          | <a href="#">Inositol phosphate metabolism</a>                                                         | RT |  | 3     | 9.4E-1  | 1.0E0     |
|                          | Annotation Cluster 36 | Enrichment Score: 0.18                                                                                |    |  | Count | P_Value | Benjamini |
| <input type="checkbox"/> | INTERPRO              | <a href="#">Thioredoxin-like</a>                                                                      | RT |  | 9     | 5.3E-1  | 1.0E0     |
| <input type="checkbox"/> | GOTERM_MF_FAT         | <a href="#">antioxidant activity</a>                                                                  | RT |  | 5     | 6.7E-1  | 1.0E0     |
| <input type="checkbox"/> | INTERPRO              | <a href="#">Alkyl hydroperoxide reductase/ Thiol specific antioxidant/ Mal allergen</a>               | RT |  | 4     | 8.0E-1  | 1.0E0     |
|                          | Annotation Cluster 37 | Enrichment Score: 0.17                                                                                |    |  | Count | P_Value | Benjamini |
| <input type="checkbox"/> | INTERPRO              | <a href="#">ATPase associated with various cellular activities, AAA-5</a>                             | RT |  | 5     | 5.1E-1  | 1.0E0     |
| <input type="checkbox"/> | INTERPRO              | <a href="#">Dynein heavy chain, N-terminal region 2</a>                                               | RT |  | 7     | 7.2E-1  | 1.0E0     |
| <input type="checkbox"/> | SP_PIR_KEYWORDS       | <a href="#">coiled coil</a>                                                                           | RT |  | 3     | 8.3E-1  | 9.9E-1    |
|                          | Annotation Cluster 38 | Enrichment Score: 0.15                                                                                |    |  | Count | P_Value | Benjamini |
| <input type="checkbox"/> | GOTERM_MF_FAT         | <a href="#">DNA-dependent ATPase activity</a>                                                         | RT |  | 6     | 5.5E-1  | 1.0E0     |
| <input type="checkbox"/> | GOTERM_MF_FAT         | <a href="#">DNA helicase activity</a>                                                                 | RT |  | 4     | 7.9E-1  | 1.0E0     |
| <input type="checkbox"/> | GOTERM_MF_FAT         | <a href="#">ATP-dependent DNA helicase activity</a>                                                   | RT |  | 3     | 8.0E-1  | 1.0E0     |
|                          | Annotation Cluster 39 | Enrichment Score: 0.15                                                                                |    |  | Count | P_Value | Benjamini |
| <input type="checkbox"/> | GOTERM_CC_FAT         | <a href="#">microtubule associated complex</a>                                                        | RT |  | 9     | 6.1E-1  | 1.0E0     |
| <input type="checkbox"/> | GOTERM_CC_FAT         | <a href="#">dynein complex</a>                                                                        | RT |  | 7     | 7.0E-1  | 1.0E0     |
| <input type="checkbox"/> | INTERPRO              | <a href="#">Dynein heavy chain, N-terminal region 2</a>                                               | RT |  | 7     | 7.2E-1  | 1.0E0     |
| <input type="checkbox"/> | INTERPRO              | <a href="#">Dynein heavy chain</a>                                                                    | RT |  | 7     | 8.1E-1  | 1.0E0     |
|                          | Annotation Cluster 40 | Enrichment Score: 0.15                                                                                |    |  | Count | P_Value | Benjamini |
| <input type="checkbox"/> | GOTERM_BP_FAT         | <a href="#">cell cycle</a>                                                                            | RT |  | 6     | 5.3E-1  | 1.0E0     |
| <input type="checkbox"/> | GOTERM_BP_FAT         | <a href="#">cell cycle phase</a>                                                                      | RT |  | 4     | 7.8E-1  | 1.0E0     |
| <input type="checkbox"/> | GOTERM_BP_FAT         | <a href="#">cell cycle process</a>                                                                    | RT |  | 4     | 7.8E-1  | 1.0E0     |
| <input type="checkbox"/> | GOTERM_BP_FAT         | <a href="#">M phase</a>                                                                               | RT |  | 4     | 7.8E-1  | 1.0E0     |
|                          | Annotation Cluster 41 | Enrichment Score: 0.15                                                                                |    |  | Count | P_Value | Benjamini |



|                          |                       |                                                                                                       |    |  |       |         |           |
|--------------------------|-----------------------|-------------------------------------------------------------------------------------------------------|----|--|-------|---------|-----------|
| <input type="checkbox"/> | GOTERM_MF_FAT         | <a href="#">electron carrier activity</a>                                                             | RT |  | 16    | 3.2E-1  | 1.0E0     |
| <input type="checkbox"/> | INTERPRO              | <a href="#">4Fe-4S ferredoxin, iron-sulphur binding domain</a>                                        | RT |  | 6     | 7.0E-1  | 1.0E0     |
| <input type="checkbox"/> | INTERPRO              | <a href="#">4Fe-4S ferredoxin, iron-sulphur binding, subgroup</a>                                     | RT |  | 6     | 7.0E-1  | 1.0E0     |
| <input type="checkbox"/> | GOTERM_MF_FAT         | <a href="#">4 iron, 4 sulfur cluster binding</a>                                                      | RT |  | 5     | 8.0E-1  | 1.0E0     |
| <input type="checkbox"/> | INTERPRO              | <a href="#">4Fe-4S ferredoxin, iron-sulphur binding, conserved site</a>                               | RT |  | 4     | 8.9E-1  | 1.0E0     |
| <input type="checkbox"/> | GOTERM_MF_FAT         | <a href="#">iron-sulfur cluster binding</a>                                                           | RT |  | 10    | 9.2E-1  | 1.0E0     |
| <input type="checkbox"/> | GOTERM_MF_FAT         | <a href="#">metal cluster binding</a>                                                                 | RT |  | 10    | 9.2E-1  | 1.0E0     |
|                          | Annotation Cluster 42 | Enrichment Score: 0.15                                                                                |    |  | Count | P_Value | Benjamini |
| <input type="checkbox"/> | GOTERM_MF_FAT         | <a href="#">protein kinase regulator activity</a>                                                     | RT |  | 5     | 6.7E-1  | 1.0E0     |
| <input type="checkbox"/> | GOTERM_MF_FAT         | <a href="#">kinase regulator activity</a>                                                             | RT |  | 5     | 6.7E-1  | 1.0E0     |
| <input type="checkbox"/> | GOTERM_MF_FAT         | <a href="#">cAMP-dependent protein kinase regulator activity</a>                                      | RT |  | 3     | 8.0E-1  | 1.0E0     |
|                          | Annotation Cluster 43 | Enrichment Score: 0.14                                                                                |    |  | Count | P_Value | Benjamini |
| <input type="checkbox"/> | GOTERM_BP_FAT         | <a href="#">carbohydrate biosynthetic process</a>                                                     | RT |  | 5     | 6.6E-1  | 1.0E0     |
| <input type="checkbox"/> | GOTERM_BP_FAT         | <a href="#">cellular carbohydrate biosynthetic process</a>                                            | RT |  | 5     | 6.6E-1  | 1.0E0     |
| <input type="checkbox"/> | GOTERM_BP_FAT         | <a href="#">alcohol biosynthetic process</a>                                                          | RT |  | 3     | 8.9E-1  | 1.0E0     |
|                          | Annotation Cluster 44 | Enrichment Score: 0.13                                                                                |    |  | Count | P_Value | Benjamini |
| <input type="checkbox"/> | PIR_SUPERFAMILY       | PIRSF002165:ribosomal protein, L7Ab/L7Aa/L7Ae/L8e types/H/ACA ribonucleoprotein complex, NHP2 subunit | RT |  | 3     | 6.2E-1  | 1.0E0     |
| <input type="checkbox"/> | INTERPRO              | <a href="#">High mobility group-like nuclear protein</a>                                              | RT |  | 3     | 6.2E-1  | 1.0E0     |
| <input type="checkbox"/> | INTERPRO              | <a href="#">Ribosomal protein L7A/RS6 family</a>                                                      | RT |  | 3     | 8.0E-1  | 1.0E0     |
| <input type="checkbox"/> | INTERPRO              | <a href="#">Ribosomal protein L7Ae/L30e/S12e/Gadd45</a>                                               | RT |  | 3     | 9.5E-1  | 1.0E0     |
|                          | Annotation Cluster 45 | Enrichment Score: 0.13                                                                                |    |  | Count | P_Value | Benjamini |
| <input type="checkbox"/> | INTERPRO              | <a href="#">EF hand</a>                                                                               | RT |  | 8     | 4.9E-1  | 1.0E0     |
| <input type="checkbox"/> | INTERPRO              | <a href="#">EF-HAND 1</a>                                                                             | RT |  | 13    | 5.4E-1  | 1.0E0     |
| <input type="checkbox"/> | INTERPRO              | <a href="#">EF-Hand type</a>                                                                          | RT |  | 11    | 6.9E-1  | 1.0E0     |
| <input type="checkbox"/> | GOTERM_MF_FAT         | <a href="#">calcium ion binding</a>                                                                   | RT |  | 24    | 7.8E-1  | 1.0E0     |
| <input type="checkbox"/> | INTERPRO              | <a href="#">Calcium-binding EF-hand</a>                                                               | RT |  | 6     | 8.8E-1  | 1.0E0     |
| <input type="checkbox"/> | INTERPRO              | <a href="#">EF-HAND 2</a>                                                                             | RT |  | 9     | 8.8E-1  | 1.0E0     |
| <input type="checkbox"/> | SMART                 | <a href="#">Efh</a>                                                                                   | RT |  | 6     | 8.9E-1  | 1.0E0     |
| <input type="checkbox"/> | SP_PIR_KEYWORDS       | <a href="#">calcium</a>                                                                               | RT |  | 8     | 9.1E-1  | 1.0E0     |
|                          | Annotation Cluster 46 | Enrichment Score: 0.13                                                                                |    |  | Count | P_Value | Benjamini |
| <input type="checkbox"/> | INTERPRO              | <a href="#">Thioredoxin-like</a>                                                                      | RT |  | 9     | 5.3E-1  | 1.0E0     |
| <input type="checkbox"/> | INTERPRO              | <a href="#">Thioredoxin, conserved site</a>                                                           | RT |  | 4     | 8.0E-1  | 1.0E0     |
| <input type="checkbox"/> | INTERPRO              | <a href="#">Thioredoxin domain</a>                                                                    | RT |  | 4     | 8.0E-1  | 1.0E0     |
| <input type="checkbox"/> | INTERPRO              | <a href="#">Thioredoxin-like subdomain</a>                                                            | RT |  | 3     | 9.0E-1  | 1.0E0     |
|                          | Annotation Cluster 47 | Enrichment Score: 0.13                                                                                |    |  | Count | P_Value | Benjamini |
| <input type="checkbox"/> | GOTERM_MF_FAT         | <a href="#">protein serine/threonine kinase activity</a>                                              | RT |  | 61    | 5.8E-1  | 1.0E0     |
| <input type="checkbox"/> | INTERPRO              | <a href="#">Serine/threonine protein kinase, active site</a>                                          | RT |  | 52    | 6.2E-1  | 1.0E0     |
| <input type="checkbox"/> | INTERPRO              | <a href="#">Protein kinase, ATP binding site</a>                                                      | RT |  | 46    | 7.8E-1  | 1.0E0     |
| <input type="checkbox"/> | INTERPRO              | <a href="#">Serine/threonine protein kinase</a>                                                       | RT |  | 32    | 8.2E-1  | 1.0E0     |
| <input type="checkbox"/> | SMART                 | <a href="#">S_TKc</a>                                                                                 | RT |  | 32    | 8.4E-1  | 1.0E0     |
| <input type="checkbox"/> | SP_PIR_KEYWORDS       | <a href="#">serine/threonine-protein kinase</a>                                                       | RT |  | 34    | 8.8E-1  | 9.9E-1    |
|                          | Annotation Cluster 48 | Enrichment Score: 0.13                                                                                |    |  | Count | P_Value | Benjamini |
| <input type="checkbox"/> | INTERPRO              | <a href="#">Pumilio RNA-binding region</a>                                                            | RT |  | 4     | 6.5E-1  | 1.0E0     |
| <input type="checkbox"/> | SMART                 | <a href="#">Pumilio</a>                                                                               | RT |  | 4     | 6.6E-1  | 1.0E0     |
| <input type="checkbox"/> | INTERPRO              | <a href="#">Armadillo-like helical</a>                                                                | RT |  | 10    | 9.5E-1  | 1.0E0     |
|                          | Annotation Cluster 49 | Enrichment Score: 0.13                                                                                |    |  | Count | P_Value | Benjamini |
| <input type="checkbox"/> | INTERPRO              | <a href="#">von Willebrand factor, type A</a>                                                         | RT |  | 5     | 6.8E-1  | 1.0E0     |
| <input type="checkbox"/> | SMART                 | <a href="#">VWA</a>                                                                                   | RT |  | 5     | 6.9E-1  | 1.0E0     |
| <input type="checkbox"/> | INTERPRO              | <a href="#">Copine</a>                                                                                | RT |  | 3     | 9.0E-1  | 1.0E0     |
|                          | Annotation Cluster 50 | Enrichment Score: 0.1                                                                                 |    |  | Count | P_Value | Benjamini |
| <input type="checkbox"/> | GOTERM_BP_FAT         | <a href="#">cellular amino acid biosynthetic process</a>                                              | RT |  | 4     | 6.4E-1  | 1.0E0     |
| <input type="checkbox"/> | GOTERM_BP_FAT         | <a href="#">amine biosynthetic process</a>                                                            | RT |  | 4     | 7.8E-1  | 1.0E0     |
| <input type="checkbox"/> | GOTERM_BP_FAT         | <a href="#">organic acid biosynthetic process</a>                                                     | RT |  | 4     | 8.8E-1  | 1.0E0     |
| <input type="checkbox"/> | GOTERM_BP_FAT         | <a href="#">carboxylic acid biosynthetic process</a>                                                  | RT |  | 4     | 8.8E-1  | 1.0E0     |
|                          | Annotation Cluster 51 | Enrichment Score: 0.1                                                                                 |    |  | Count | P_Value | Benjamini |
| <input type="checkbox"/> | GOTERM_BP_FAT         | <a href="#">generation of precursor metabolites and energy</a>                                        | RT |  | 17    | 4.1E-1  | 1.0E0     |
| <input type="checkbox"/> | GOTERM_MF_FAT         | <a href="#">ATPase activity, coupled to transmembrane movement of ions</a>                            | RT |  | 13    | 5.3E-1  | 1.0E0     |

|                          |                       |                                                                                                                |    |  |       |         |           |
|--------------------------|-----------------------|----------------------------------------------------------------------------------------------------------------|----|--|-------|---------|-----------|
| <input type="checkbox"/> | INTERPRO              | <a href="#">ATPase, P-type phosphorylation site</a>                                                            | RT |  | 6     | 5.6E-1  | 1.0E0     |
| <input type="checkbox"/> | GOTERM_MF_FAT         | <a href="#">proton-transporting ATPase activity, rotational mechanism</a>                                      | RT |  | 5     | 6.7E-1  | 1.0E0     |
| <input type="checkbox"/> | GOTERM_BP_FAT         | <a href="#">ion transport</a>                                                                                  | RT |  | 14    | 7.0E-1  | 1.0E0     |
| <input type="checkbox"/> | GOTERM_BP_FAT         | <a href="#">cation transport</a>                                                                               | RT |  | 14    | 7.0E-1  | 1.0E0     |
| <input type="checkbox"/> | GOTERM_CC_FAT         | <a href="#">proton-transporting two-sector ATPase complex, catalytic domain</a>                                | RT |  | 5     | 7.1E-1  | 1.0E0     |
| <input type="checkbox"/> | INTERPRO              | <a href="#">ATPase, P-type, ATPase-associated region</a>                                                       | RT |  | 7     | 7.2E-1  | 1.0E0     |
| <input type="checkbox"/> | GOTERM_MF_FAT         | <a href="#">monovalent inorganic cation transmembrane transporter activity</a>                                 | RT |  | 9     | 7.4E-1  | 1.0E0     |
| <input type="checkbox"/> | GOTERM_MF_FAT         | <a href="#">hydrogen ion transmembrane transporter activity</a>                                                | RT |  | 9     | 7.4E-1  | 1.0E0     |
| <input type="checkbox"/> | GOTERM_MF_FAT         | <a href="#">ATPase activity, coupled to transmembrane movement of substances</a>                               | RT |  | 16    | 7.5E-1  | 1.0E0     |
| <input type="checkbox"/> | GOTERM_MF_FAT         | <a href="#">ATPase activity, coupled to movement of substances</a>                                             | RT |  | 16    | 7.5E-1  | 1.0E0     |
| <input type="checkbox"/> | GOTERM_MF_FAT         | <a href="#">primary active transmembrane transporter activity</a>                                              | RT |  | 17    | 7.7E-1  | 1.0E0     |
| <input type="checkbox"/> | GOTERM_MF_FAT         | <a href="#">P-P-bond-hydrolysis-driven transmembrane transporter activity</a>                                  | RT |  | 17    | 7.7E-1  | 1.0E0     |
| <input type="checkbox"/> | GOTERM_BP_FAT         | <a href="#">ATP metabolic process</a>                                                                          | RT |  | 14    | 7.8E-1  | 1.0E0     |
| <input type="checkbox"/> | GOTERM_BP_FAT         | <a href="#">ATP biosynthetic process</a>                                                                       | RT |  | 14    | 7.8E-1  | 1.0E0     |
| <input type="checkbox"/> | GOTERM_BP_FAT         | <a href="#">nucleoside triphosphate biosynthetic process</a>                                                   | RT |  | 15    | 7.8E-1  | 1.0E0     |
| <input type="checkbox"/> | GOTERM_BP_FAT         | <a href="#">nucleoside triphosphate metabolic process</a>                                                      | RT |  | 15    | 7.8E-1  | 1.0E0     |
| <input type="checkbox"/> | GOTERM_BP_FAT         | <a href="#">purine nucleoside triphosphate biosynthetic process</a>                                            | RT |  | 15    | 7.8E-1  | 1.0E0     |
| <input type="checkbox"/> | GOTERM_BP_FAT         | <a href="#">purine nucleoside triphosphate metabolic process</a>                                               | RT |  | 15    | 7.8E-1  | 1.0E0     |
| <input type="checkbox"/> | GOTERM_BP_FAT         | <a href="#">purine ribonucleoside triphosphate metabolic process</a>                                           | RT |  | 15    | 7.8E-1  | 1.0E0     |
| <input type="checkbox"/> | GOTERM_BP_FAT         | <a href="#">purine ribonucleoside triphosphate biosynthetic process</a>                                        | RT |  | 15    | 7.8E-1  | 1.0E0     |
| <input type="checkbox"/> | GOTERM_BP_FAT         | <a href="#">ribonucleoside triphosphate metabolic process</a>                                                  | RT |  | 15    | 7.8E-1  | 1.0E0     |
| <input type="checkbox"/> | GOTERM_BP_FAT         | <a href="#">ribonucleoside triphosphate biosynthetic process</a>                                               | RT |  | 15    | 7.8E-1  | 1.0E0     |
| <input type="checkbox"/> | GOTERM_MF_FAT         | <a href="#">cation-transporting ATPase activity</a>                                                            | RT |  | 6     | 8.0E-1  | 1.0E0     |
| <input type="checkbox"/> | GOTERM_MF_FAT         | <a href="#">ATPase activity, coupled to transmembrane movement of ions, phosphorylative mechanism</a>          | RT |  | 7     | 8.1E-1  | 1.0E0     |
| <input type="checkbox"/> | INTERPRO              | <a href="#">ATPase, P-type, K/Mg/Cd/Cu/Zn/Na/Ca/Na/H-transporter</a>                                           | RT |  | 7     | 8.1E-1  | 1.0E0     |
| <input type="checkbox"/> | GOTERM_MF_FAT         | <a href="#">inorganic cation transmembrane transporter activity</a>                                            | RT |  | 10    | 8.3E-1  | 1.0E0     |
| <input type="checkbox"/> | GOTERM_BP_FAT         | <a href="#">purine ribonucleotide biosynthetic process</a>                                                     | RT |  | 15    | 8.4E-1  | 1.0E0     |
| <input type="checkbox"/> | GOTERM_BP_FAT         | <a href="#">purine ribonucleotide metabolic process</a>                                                        | RT |  | 15    | 8.4E-1  | 1.0E0     |
| <input type="checkbox"/> | GOTERM_BP_FAT         | <a href="#">ribonucleotide metabolic process</a>                                                               | RT |  | 15    | 8.4E-1  | 1.0E0     |
| <input type="checkbox"/> | GOTERM_BP_FAT         | <a href="#">ribonucleotide biosynthetic process</a>                                                            | RT |  | 15    | 8.4E-1  | 1.0E0     |
| <input type="checkbox"/> | GOTERM_BP_FAT         | <a href="#">purine nucleotide metabolic process</a>                                                            | RT |  | 16    | 8.4E-1  | 1.0E0     |
| <input type="checkbox"/> | GOTERM_BP_FAT         | <a href="#">nitrogen compound biosynthetic process</a>                                                         | RT |  | 26    | 8.6E-1  | 1.0E0     |
| <input type="checkbox"/> | GOTERM_MF_FAT         | <a href="#">hydrolase activity, acting on acid anhydrides, catalyzing transmembrane movement of substances</a> | RT |  | 16    | 8.6E-1  | 1.0E0     |
| <input type="checkbox"/> | GOTERM_BP_FAT         | <a href="#">oxidative phosphorylation</a>                                                                      | RT |  | 7     | 8.6E-1  | 1.0E0     |
| <input type="checkbox"/> | GOTERM_BP_FAT         | <a href="#">ATP synthesis coupled proton transport</a>                                                         | RT |  | 7     | 8.6E-1  | 1.0E0     |
| <input type="checkbox"/> | GOTERM_BP_FAT         | <a href="#">energy coupled proton transport, down electrochemical gradient</a>                                 | RT |  | 7     | 8.6E-1  | 1.0E0     |
| <input type="checkbox"/> | GOTERM_BP_FAT         | <a href="#">purine nucleotide biosynthetic process</a>                                                         | RT |  | 15    | 8.8E-1  | 1.0E0     |
| <input type="checkbox"/> | GOTERM_BP_FAT         | <a href="#">nucleotide biosynthetic process</a>                                                                | RT |  | 20    | 9.0E-1  | 1.0E0     |
| <input type="checkbox"/> | GOTERM_CC_FAT         | <a href="#">proton-transporting two-sector ATPase complex</a>                                                  | RT |  | 7     | 9.1E-1  | 1.0E0     |
| <input type="checkbox"/> | GOTERM_BP_FAT         | <a href="#">monovalent inorganic cation transport</a>                                                          | RT |  | 8     | 9.1E-1  | 1.0E0     |
| <input type="checkbox"/> | GOTERM_BP_FAT         | <a href="#">ion transmembrane transport</a>                                                                    | RT |  | 7     | 9.1E-1  | 1.0E0     |
| <input type="checkbox"/> | SP_PIR_KEYWORDS       | <a href="#">ion transport</a>                                                                                  | RT |  | 3     | 9.2E-1  | 1.0E0     |
| <input type="checkbox"/> | GOTERM_BP_FAT         | <a href="#">nucleobase, nucleoside and nucleotide biosynthetic process</a>                                     | RT |  | 21    | 9.3E-1  | 1.0E0     |
| <input type="checkbox"/> | GOTERM_BP_FAT         | <a href="#">nucleobase, nucleoside, nucleotide and nucleic acid biosynthetic process</a>                       | RT |  | 21    | 9.3E-1  | 1.0E0     |
| <input type="checkbox"/> | GOTERM_BP_FAT         | <a href="#">transmembrane transport</a>                                                                        | RT |  | 10    | 9.4E-1  | 1.0E0     |
| <input type="checkbox"/> | GOTERM_BP_FAT         | <a href="#">hydrogen transport</a>                                                                             | RT |  | 7     | 9.5E-1  | 1.0E0     |
| <input type="checkbox"/> | GOTERM_BP_FAT         | <a href="#">proton transport</a>                                                                               | RT |  | 7     | 9.5E-1  | 1.0E0     |
| <input type="checkbox"/> | KEGG_PATHWAY          | <a href="#">Oxidative phosphorylation</a>                                                                      | RT |  | 6     | 9.8E-1  | 1.0E0     |
| <input type="checkbox"/> | GOTERM_CC_FAT         | <a href="#">proton-transporting V-type ATPase complex</a>                                                      | RT |  | 3     | 9.9E-1  | 1.0E0     |
| <input type="checkbox"/> | Annotation Cluster 52 | Enrichment Score: 0.1                                                                                          |    |  | Count | P_Value | Benjamini |
| <input type="checkbox"/> | GOTERM_CC_FAT         | <a href="#">organelle membrane</a>                                                                             | RT |  | 8     | 3.5E-1  | 1.0E0     |

|                          |                 |                                                           |    |  |       |         |           |
|--------------------------|-----------------|-----------------------------------------------------------|----|--|-------|---------|-----------|
| <input type="checkbox"/> | GOTERM_CC_FAT   | <a href="#">transport vesicle membrane</a>                | RT |  | 4     | 5.6E-1  | 1.0E0     |
| <input type="checkbox"/> | GOTERM_CC_FAT   | <a href="#">transport vesicle</a>                         | RT |  | 4     | 5.6E-1  | 1.0E0     |
| <input type="checkbox"/> | GOTERM_CC_FAT   | <a href="#">cytoplasmic vesicle part</a>                  | RT |  | 4     | 7.2E-1  | 1.0E0     |
| <input type="checkbox"/> | GOTERM_CC_FAT   | <a href="#">vesicle membrane</a>                          | RT |  | 4     | 7.2E-1  | 1.0E0     |
| <input type="checkbox"/> | GOTERM_CC_FAT   | <a href="#">coated vesicle membrane</a>                   | RT |  | 4     | 7.2E-1  | 1.0E0     |
| <input type="checkbox"/> | GOTERM_CC_FAT   | <a href="#">cytoplasmic vesicle membrane</a>              | RT |  | 4     | 7.2E-1  | 1.0E0     |
| <input type="checkbox"/> | GOTERM_CC_FAT   | <a href="#">coated vesicle</a>                            | RT |  | 4     | 7.2E-1  | 1.0E0     |
| <input type="checkbox"/> | GOTERM_CC_FAT   | <a href="#">vesicle coat</a>                              | RT |  | 4     | 7.2E-1  | 1.0E0     |
| <input type="checkbox"/> | GOTERM_CC_FAT   | <a href="#">cytoplasmic membrane-bounded vesicle</a>      | RT |  | 4     | 7.2E-1  | 1.0E0     |
| <input type="checkbox"/> | GOTERM_CC_FAT   | <a href="#">vesicle</a>                                   | RT |  | 4     | 7.2E-1  | 1.0E0     |
| <input type="checkbox"/> | GOTERM_CC_FAT   | <a href="#">membrane-bounded vesicle</a>                  | RT |  | 4     | 7.2E-1  | 1.0E0     |
| <input type="checkbox"/> | GOTERM_CC_FAT   | <a href="#">cytoplasmic vesicle</a>                       | RT |  | 4     | 7.2E-1  | 1.0E0     |
| <input type="checkbox"/> | GOTERM_CC_FAT   | <a href="#">ER to Golgi transport vesicle membrane</a>    | RT |  | 3     | 7.4E-1  | 1.0E0     |
| <input type="checkbox"/> | GOTERM_CC_FAT   | <a href="#">ER to Golgi transport vesicle</a>             | RT |  | 3     | 7.4E-1  | 1.0E0     |
| <input type="checkbox"/> | GOTERM_CC_FAT   | <a href="#">COPII vesicle coat</a>                        | RT |  | 3     | 7.4E-1  | 1.0E0     |
| <input type="checkbox"/> | GOTERM_CC_FAT   | <a href="#">endomembrane system</a>                       | RT |  | 8     | 8.5E-1  | 1.0E0     |
| <input type="checkbox"/> | GOTERM_CC_FAT   | <a href="#">Golgi apparatus part</a>                      | RT |  | 4     | 9.0E-1  | 1.0E0     |
| <input type="checkbox"/> | GOTERM_BP_FAT   | <a href="#">ER to Golgi vesicle-mediated transport</a>    | RT |  | 3     | 9.5E-1  | 1.0E0     |
| <input type="checkbox"/> | GOTERM_BP_FAT   | <a href="#">Golgi vesicle transport</a>                   | RT |  | 3     | 9.5E-1  | 1.0E0     |
| <input type="checkbox"/> | GOTERM_CC_FAT   | <a href="#">coated membrane</a>                           | RT |  | 6     | 9.5E-1  | 1.0E0     |
| <input type="checkbox"/> | GOTERM_CC_FAT   | <a href="#">membrane coat</a>                             | RT |  | 6     | 9.5E-1  | 1.0E0     |
| <input type="checkbox"/> | GOTERM_CC_FAT   | <a href="#">Golgi apparatus</a>                           | RT |  | 4     | 9.8E-1  | 1.0E0     |
| <input type="checkbox"/> | GOTERM_BP_FAT   | <a href="#">establishment of protein localization</a>     | RT |  | 14    | 9.9E-1  | 1.0E0     |
| <input type="checkbox"/> | GOTERM_BP_FAT   | <a href="#">protein transport</a>                         | RT |  | 14    | 9.9E-1  | 1.0E0     |
| <input type="checkbox"/> | GOTERM_BP_FAT   | <a href="#">intracellular protein transport</a>           | RT |  | 9     | 9.9E-1  | 1.0E0     |
| <input type="checkbox"/> | GOTERM_BP_FAT   | <a href="#">cellular macromolecule localization</a>       | RT |  | 9     | 9.9E-1  | 1.0E0     |
| <input type="checkbox"/> | GOTERM_BP_FAT   | <a href="#">cellular protein localization</a>             | RT |  | 9     | 9.9E-1  | 1.0E0     |
| <input type="checkbox"/> | GOTERM_BP_FAT   | <a href="#">protein localization</a>                      | RT |  | 14    | 9.9E-1  | 1.0E0     |
| <input type="checkbox"/> | GOTERM_BP_FAT   | <a href="#">intracellular transport</a>                   | RT |  | 10    | 1.0E0   | 1.0E0     |
| <input type="checkbox"/> | GOTERM_BP_FAT   | <a href="#">vesicle-mediated transport</a>                | RT |  | 10    | 1.0E0   | 1.0E0     |
| Annotation Cluster 53    |                 | Enrichment Score: 0.09                                    |    |  | Count | P_Value | Benjamini |
| <input type="checkbox"/> | INTERPRO        | <a href="#">Annexin</a>                                   | RT |  | 10    | 6.7E-1  | 1.0E0     |
| <input type="checkbox"/> | GOTERM_MF_FAT   | <a href="#">calcium-dependent phospholipid binding</a>    | RT |  | 13    | 7.1E-1  | 1.0E0     |
| <input type="checkbox"/> | SP_PIR_KEYWORDS | <a href="#">annexin</a>                                   | RT |  | 10    | 7.3E-1  | 9.9E-1    |
| <input type="checkbox"/> | GOTERM_MF_FAT   | <a href="#">calcium ion binding</a>                       | RT |  | 24    | 7.8E-1  | 1.0E0     |
| <input type="checkbox"/> | GOTERM_MF_FAT   | <a href="#">phospholipid binding</a>                      | RT |  | 15    | 8.1E-1  | 1.0E0     |
| <input type="checkbox"/> | INTERPRO        | <a href="#">Annexin repeat</a>                            | RT |  | 8     | 8.2E-1  | 1.0E0     |
| <input type="checkbox"/> | SMART           | <a href="#">ANX</a>                                       | RT |  | 8     | 8.3E-1  | 1.0E0     |
| <input type="checkbox"/> | GOTERM_MF_FAT   | <a href="#">lipid binding</a>                             | RT |  | 19    | 8.8E-1  | 1.0E0     |
| <input type="checkbox"/> | INTERPRO        | <a href="#">Alpha giardin</a>                             | RT |  | 6     | 9.3E-1  | 1.0E0     |
| <input type="checkbox"/> | GOTERM_BP_FAT   | <a href="#">cytoskeleton organization</a>                 | RT |  | 7     | 9.7E-1  | 1.0E0     |
| Annotation Cluster 54    |                 | Enrichment Score: 0.09                                    |    |  | Count | P_Value | Benjamini |
| <input type="checkbox"/> | GOTERM_BP_FAT   | <a href="#">cofactor biosynthetic process</a>             | RT |  | 6     | 6.8E-1  | 1.0E0     |
| <input type="checkbox"/> | GOTERM_BP_FAT   | <a href="#">cofactor metabolic process</a>                | RT |  | 7     | 7.9E-1  | 1.0E0     |
| <input type="checkbox"/> | GOTERM_BP_FAT   | <a href="#">coenzyme biosynthetic process</a>             | RT |  | 4     | 8.8E-1  | 1.0E0     |
| <input type="checkbox"/> | GOTERM_BP_FAT   | <a href="#">coenzyme metabolic process</a>                | RT |  | 5     | 9.2E-1  | 1.0E0     |
| Annotation Cluster 55    |                 | Enrichment Score: 0.09                                    |    |  | Count | P_Value | Benjamini |
| <input type="checkbox"/> | INTERPRO        | <a href="#">DNA-dependent ATPase MCM</a>                  | RT |  | 4     | 8.0E-1  | 1.0E0     |
| <input type="checkbox"/> | SMART           | <a href="#">MCM</a>                                       | RT |  | 4     | 8.1E-1  | 1.0E0     |
| <input type="checkbox"/> | INTERPRO        | <a href="#">Nucleic acid-binding, OB-fold</a>             | RT |  | 11    | 8.4E-1  | 1.0E0     |
| Annotation Cluster 56    |                 | Enrichment Score: 0.09                                    |    |  | Count | P_Value | Benjamini |
| <input type="checkbox"/> | INTERPRO        | <a href="#">Ras</a>                                       | RT |  | 8     | 6.2E-1  | 1.0E0     |
| <input type="checkbox"/> | INTERPRO        | <a href="#">Ras GTPase</a>                                | RT |  | 8     | 7.3E-1  | 1.0E0     |
| <input type="checkbox"/> | PIR_SUPERFAMILY | PIRSF001710:Ras-related protein Rab                       | RT |  | 4     | 8.0E-1  | 1.0E0     |
| <input type="checkbox"/> | GOTERM_BP_FAT   | <a href="#">small GTPase mediated signal transduction</a> | RT |  | 9     | 8.0E-1  | 1.0E0     |
| <input type="checkbox"/> | SP_PIR_KEYWORDS | <a href="#">gtp-binding</a>                               | RT |  | 23    | 8.1E-1  | 9.9E-1    |
| <input type="checkbox"/> | INTERPRO        | <a href="#">Small GTP-binding protein</a>                 | RT |  | 11    | 8.4E-1  | 1.0E0     |
| <input type="checkbox"/> | GOTERM_BP_FAT   | <a href="#">intracellular signaling cascade</a>           | RT |  | 11    | 8.7E-1  | 1.0E0     |

| <input type="checkbox"/> | GOTERM_MF_FAT         | <a href="#">GTPase activity</a>                                                                              | RT |  |  |  | 9     | 8.8E-1  | 1.0E0     |
|--------------------------|-----------------------|--------------------------------------------------------------------------------------------------------------|----|--|--|--|-------|---------|-----------|
| <input type="checkbox"/> | GOTERM_MF_FAT         | <a href="#">GTP binding</a>                                                                                  | RT |  |  |  | 25    | 9.0E-1  | 1.0E0     |
| <input type="checkbox"/> | GOTERM_MF_FAT         | <a href="#">guanyl ribonucleotide binding</a>                                                                | RT |  |  |  | 25    | 9.0E-1  | 1.0E0     |
| <input type="checkbox"/> | GOTERM_MF_FAT         | <a href="#">guanyl nucleotide binding</a>                                                                    | RT |  |  |  | 25    | 9.0E-1  | 1.0E0     |
|                          | Annotation Cluster 57 | Enrichment Score: 0.09                                                                                       |    |  |  |  | Count | P_Value | Benjamini |
| <input type="checkbox"/> | INTERPRO              | <a href="#">Aminoacyl-tRNA synthetase, class I, conserved site</a>                                           | RT |  |  |  | 7     | 4.4E-1  | 1.0E0     |
| <input type="checkbox"/> | INTERPRO              | <a href="#">Rossmann-like alpha/beta/alpha sandwich fold</a>                                                 | RT |  |  |  | 12    | 6.1E-1  | 1.0E0     |
| <input type="checkbox"/> | GOTERM_MF_FAT         | <a href="#">ligase activity, forming carbon-oxygen bonds</a>                                                 | RT |  |  |  | 13    | 8.5E-1  | 1.0E0     |
| <input type="checkbox"/> | GOTERM_MF_FAT         | <a href="#">ligase activity, forming aminoacyl-tRNA and related compounds</a>                                | RT |  |  |  | 13    | 8.5E-1  | 1.0E0     |
| <input type="checkbox"/> | GOTERM_MF_FAT         | <a href="#">aminoacyl-tRNA ligase activity</a>                                                               | RT |  |  |  | 13    | 8.5E-1  | 1.0E0     |
| <input type="checkbox"/> | GOTERM_BP_FAT         | <a href="#">tRNA metabolic process</a>                                                                       | RT |  |  |  | 21    | 8.7E-1  | 1.0E0     |
| <input type="checkbox"/> | GOTERM_BP_FAT         | <a href="#">tRNA aminoacylation</a>                                                                          | RT |  |  |  | 12    | 8.7E-1  | 1.0E0     |
| <input type="checkbox"/> | GOTERM_BP_FAT         | <a href="#">amino acid activation</a>                                                                        | RT |  |  |  | 12    | 8.7E-1  | 1.0E0     |
| <input type="checkbox"/> | GOTERM_BP_FAT         | <a href="#">ncRNA metabolic process</a>                                                                      | RT |  |  |  | 27    | 8.9E-1  | 1.0E0     |
| <input type="checkbox"/> | GOTERM_BP_FAT         | <a href="#">tRNA aminoacylation for protein translation</a>                                                  | RT |  |  |  | 11    | 9.1E-1  | 1.0E0     |
| <input type="checkbox"/> | SP_PIR_KEYWORDS       | <a href="#">Aminoacyl-tRNA synthetase</a>                                                                    | RT |  |  |  | 12    | 9.3E-1  | 1.0E0     |
| <input type="checkbox"/> | SP_PIR_KEYWORDS       | <a href="#">protein biosynthesis</a>                                                                         | RT |  |  |  | 5     | 9.5E-1  | 1.0E0     |
| <input type="checkbox"/> | KEGG_PATHWAY          | <a href="#">Aminoacyl-tRNA biosynthesis</a>                                                                  | RT |  |  |  | 10    | 9.9E-1  | 1.0E0     |
|                          | Annotation Cluster 58 | Enrichment Score: 0.07                                                                                       |    |  |  |  | Count | P_Value | Benjamini |
| <input type="checkbox"/> | GOTERM_CC_FAT         | <a href="#">organelle lumen</a>                                                                              | RT |  |  |  | 3     | 8.5E-1  | 1.0E0     |
| <input type="checkbox"/> | GOTERM_CC_FAT         | <a href="#">intracellular organelle lumen</a>                                                                | RT |  |  |  | 3     | 8.5E-1  | 1.0E0     |
| <input type="checkbox"/> | GOTERM_CC_FAT         | <a href="#">membrane-enclosed lumen</a>                                                                      | RT |  |  |  | 3     | 8.5E-1  | 1.0E0     |
| <input type="checkbox"/> | GOTERM_CC_FAT         | <a href="#">nuclear lumen</a>                                                                                | RT |  |  |  | 3     | 8.5E-1  | 1.0E0     |
|                          | Annotation Cluster 59 | Enrichment Score: 0.07                                                                                       |    |  |  |  | Count | P_Value | Benjamini |
| <input type="checkbox"/> | GOTERM_MF_FAT         | <a href="#">NAD or NADH binding</a>                                                                          | RT |  |  |  | 6     | 5.5E-1  | 1.0E0     |
| <input type="checkbox"/> | GOTERM_BP_FAT         | <a href="#">regulation of transcription, DNA-dependent</a>                                                   | RT |  |  |  | 7     | 7.9E-1  | 1.0E0     |
| <input type="checkbox"/> | GOTERM_BP_FAT         | <a href="#">regulation of RNA metabolic process</a>                                                          | RT |  |  |  | 7     | 7.9E-1  | 1.0E0     |
| <input type="checkbox"/> | GOTERM_MF_FAT         | <a href="#">hydrolase activity, acting on carbon-nitrogen (but not peptide) bonds, in linear amides</a>      | RT |  |  |  | 5     | 8.0E-1  | 1.0E0     |
| <input type="checkbox"/> | GOTERM_BP_FAT         | <a href="#">regulation of transcription</a>                                                                  | RT |  |  |  | 17    | 8.0E-1  | 1.0E0     |
| <input type="checkbox"/> | GOTERM_BP_FAT         | <a href="#">negative regulation of gene expression</a>                                                       | RT |  |  |  | 4     | 8.8E-1  | 1.0E0     |
| <input type="checkbox"/> | GOTERM_BP_FAT         | <a href="#">negative regulation of macromolecule metabolic process</a>                                       | RT |  |  |  | 4     | 8.8E-1  | 1.0E0     |
| <input type="checkbox"/> | GOTERM_BP_FAT         | <a href="#">gene silencing</a>                                                                               | RT |  |  |  | 4     | 8.8E-1  | 1.0E0     |
| <input type="checkbox"/> | GOTERM_BP_FAT         | <a href="#">chromatin silencing</a>                                                                          | RT |  |  |  | 3     | 8.9E-1  | 1.0E0     |
| <input type="checkbox"/> | GOTERM_BP_FAT         | <a href="#">negative regulation of cellular biosynthetic process</a>                                         | RT |  |  |  | 3     | 8.9E-1  | 1.0E0     |
| <input type="checkbox"/> | GOTERM_BP_FAT         | <a href="#">negative regulation of macromolecule biosynthetic process</a>                                    | RT |  |  |  | 3     | 8.9E-1  | 1.0E0     |
| <input type="checkbox"/> | GOTERM_BP_FAT         | <a href="#">negative regulation of RNA metabolic process</a>                                                 | RT |  |  |  | 3     | 8.9E-1  | 1.0E0     |
| <input type="checkbox"/> | GOTERM_BP_FAT         | <a href="#">negative regulation of biosynthetic process</a>                                                  | RT |  |  |  | 3     | 8.9E-1  | 1.0E0     |
| <input type="checkbox"/> | GOTERM_BP_FAT         | <a href="#">regulation of gene expression, epigenetic</a>                                                    | RT |  |  |  | 3     | 8.9E-1  | 1.0E0     |
| <input type="checkbox"/> | GOTERM_BP_FAT         | <a href="#">negative regulation of nitrogen compound metabolic process</a>                                   | RT |  |  |  | 3     | 8.9E-1  | 1.0E0     |
| <input type="checkbox"/> | GOTERM_BP_FAT         | <a href="#">negative regulation of nucleobase, nucleoside, nucleotide and nucleic acid metabolic process</a> | RT |  |  |  | 3     | 8.9E-1  | 1.0E0     |
| <input type="checkbox"/> | GOTERM_BP_FAT         | <a href="#">negative regulation of transcription</a>                                                         | RT |  |  |  | 3     | 8.9E-1  | 1.0E0     |
| <input type="checkbox"/> | GOTERM_BP_FAT         | <a href="#">negative regulation of gene expression, epigenetic</a>                                           | RT |  |  |  | 3     | 8.9E-1  | 1.0E0     |
| <input type="checkbox"/> | GOTERM_BP_FAT         | <a href="#">negative regulation of transcription, DNA-dependent</a>                                          | RT |  |  |  | 3     | 8.9E-1  | 1.0E0     |
| <input type="checkbox"/> | GOTERM_MF_FAT         | <a href="#">NAD binding</a>                                                                                  | RT |  |  |  | 3     | 9.0E-1  | 1.0E0     |
| <input type="checkbox"/> | INTERPRO              | <a href="#">NAD-dependent histone deacetylase, silent information regulator Sir2</a>                         | RT |  |  |  | 3     | 9.0E-1  | 1.0E0     |
| <input type="checkbox"/> | GOTERM_BP_FAT         | <a href="#">protein amino acid deacetylation</a>                                                             | RT |  |  |  | 3     | 9.5E-1  | 1.0E0     |
|                          | Annotation Cluster 60 | Enrichment Score: 0.06                                                                                       |    |  |  |  | Count | P_Value | Benjamini |
| <input type="checkbox"/> | SP_PIR_KEYWORDS       | <a href="#">Acyltransferase</a>                                                                              | RT |  |  |  | 7     | 7.6E-1  | 9.9E-1    |
| <input type="checkbox"/> | INTERPRO              | <a href="#">Acyl-CoA N-acyltransferase</a>                                                                   | RT |  |  |  | 6     | 8.1E-1  | 1.0E0     |
| <input type="checkbox"/> | GOTERM_MF_FAT         | <a href="#">N-acetyltransferase activity</a>                                                                 | RT |  |  |  | 5     | 8.8E-1  | 1.0E0     |
| <input type="checkbox"/> | INTERPRO              | <a href="#">GCN5-related N-acetyltransferase</a>                                                             | RT |  |  |  | 5     | 8.8E-1  | 1.0E0     |
| <input type="checkbox"/> | GOTERM_MF_FAT         | <a href="#">N-acyltransferase activity</a>                                                                   | RT |  |  |  | 5     | 9.3E-1  | 1.0E0     |
| <input type="checkbox"/> | GOTERM_MF_FAT         | <a href="#">acetyltransferase activity</a>                                                                   | RT |  |  |  | 5     | 9.3E-1  | 1.0E0     |
|                          | Annotation Cluster 61 | Enrichment Score: 0.06                                                                                       |    |  |  |  | Count | P_Value | Benjamini |

| <input type="checkbox"/> | Annotation Cluster    | Enrichment Score: 0.05                                            | RT |  | Count | P_Value | Benjamini |
|--------------------------|-----------------------|-------------------------------------------------------------------|----|--|-------|---------|-----------|
| <input type="checkbox"/> | GOTERM_BP_FAT         | <a href="#">tRNA processing</a>                                   | RT |  | 9     | 8.7E-1  | 1.0EO     |
| <input type="checkbox"/> | GOTERM_BP_FAT         | <a href="#">tRNA metabolic process</a>                            | RT |  | 21    | 8.7E-1  | 1.0EO     |
| <input type="checkbox"/> | GOTERM_BP_FAT         | <a href="#">RNA processing</a>                                    | RT |  | 24    | 8.8E-1  | 1.0EO     |
| <input type="checkbox"/> | GOTERM_BP_FAT         | <a href="#">ncRNA processing</a>                                  | RT |  | 15    | 8.8E-1  | 1.0EO     |
| <input type="checkbox"/> | GOTERM_BP_FAT         | <a href="#">ncRNA metabolic process</a>                           | RT |  | 27    | 8.9E-1  | 1.0EO     |
|                          | Annotation Cluster 62 | Enrichment Score: 0.05                                            |    |  | Count | P_Value | Benjamini |
| <input type="checkbox"/> | GOTERM_BP_FAT         | <a href="#">rRNA processing</a>                                   | RT |  | 7     | 8.6E-1  | 1.0EO     |
| <input type="checkbox"/> | GOTERM_BP_FAT         | <a href="#">rRNA metabolic process</a>                            | RT |  | 7     | 8.6E-1  | 1.0EO     |
| <input type="checkbox"/> | GOTERM_BP_FAT         | <a href="#">ncRNA processing</a>                                  | RT |  | 15    | 8.8E-1  | 1.0EO     |
| <input type="checkbox"/> | GOTERM_BP_FAT         | <a href="#">ribosome biogenesis</a>                               | RT |  | 10    | 9.1E-1  | 1.0EO     |
| <input type="checkbox"/> | GOTERM_BP_FAT         | <a href="#">ribonucleoprotein complex biogenesis</a>              | RT |  | 10    | 9.1E-1  | 1.0EO     |
|                          | Annotation Cluster 63 | Enrichment Score: 0.05                                            |    |  | Count | P_Value | Benjamini |
| <input type="checkbox"/> | GOTERM_BP_FAT         | <a href="#">protein amino acid lipidation</a>                     | RT |  | 3     | 8.9E-1  | 1.0EO     |
| <input type="checkbox"/> | GOTERM_BP_FAT         | <a href="#">lipoprotein metabolic process</a>                     | RT |  | 3     | 8.9E-1  | 1.0EO     |
| <input type="checkbox"/> | GOTERM_BP_FAT         | <a href="#">lipoprotein biosynthetic process</a>                  | RT |  | 3     | 8.9E-1  | 1.0EO     |
|                          | Annotation Cluster 64 | Enrichment Score: 0.05                                            |    |  | Count | P_Value | Benjamini |
| <input type="checkbox"/> | GOTERM_BP_FAT         | <a href="#">mismatch repair</a>                                   | RT |  | 3     | 8.9E-1  | 1.0EO     |
| <input type="checkbox"/> | GOTERM_MF_FAT         | <a href="#">structure-specific DNA binding</a>                    | RT |  | 3     | 9.0E-1  | 1.0EO     |
| <input type="checkbox"/> | GOTERM_MF_FAT         | <a href="#">mismatched DNA binding</a>                            | RT |  | 3     | 9.0E-1  | 1.0EO     |
| <input type="checkbox"/> | GOTERM_MF_FAT         | <a href="#">double-stranded DNA binding</a>                       | RT |  | 3     | 9.0E-1  | 1.0EO     |
|                          | Annotation Cluster 65 | Enrichment Score: 0.05                                            |    |  | Count | P_Value | Benjamini |
| <input type="checkbox"/> | GOTERM_MF_FAT         | <a href="#">intramolecular transferase activity</a>               | RT |  | 6     | 8.8E-1  | 1.0EO     |
| <input type="checkbox"/> | GOTERM_BP_FAT         | <a href="#">pseudouridine synthesis</a>                           | RT |  | 4     | 8.8E-1  | 1.0EO     |
| <input type="checkbox"/> | GOTERM_MF_FAT         | <a href="#">pseudouridine synthase activity</a>                   | RT |  | 4     | 8.8E-1  | 1.0EO     |
| <input type="checkbox"/> | GOTERM_BP_FAT         | <a href="#">RNA modification</a>                                  | RT |  | 7     | 9.7E-1  | 1.0EO     |
|                          | Annotation Cluster 66 | Enrichment Score: 0.04                                            |    |  | Count | P_Value | Benjamini |
| <input type="checkbox"/> | GOTERM_MF_FAT         | <a href="#">GTPase activity</a>                                   | RT |  | 9     | 8.8E-1  | 1.0EO     |
| <input type="checkbox"/> | INTERPRO              | <a href="#">Translation elongation factor EFTu/EF1A, domain 2</a> | RT |  | 3     | 9.0E-1  | 1.0EO     |
| <input type="checkbox"/> | INTERPRO              | <a href="#">Protein synthesis factor, GTP-binding</a>             | RT |  | 4     | 9.4E-1  | 1.0EO     |
|                          | Annotation Cluster 67 | Enrichment Score: 0.04                                            |    |  | Count | P_Value | Benjamini |
| <input type="checkbox"/> | PIR_SUPERFAMILY       | PIRSF001567:ubiquitin-protein ligase E2                           | RT |  | 4     | 8.0E-1  | 1.0EO     |
| <input type="checkbox"/> | KEGG_PATHWAY          | <a href="#">Ubiquitin mediated proteolysis</a>                    | RT |  | 7     | 8.2E-1  | 9.9E-1    |
| <input type="checkbox"/> | GOTERM_MF_FAT         | <a href="#">small conjugating protein ligase activity</a>         | RT |  | 7     | 8.8E-1  | 1.0EO     |
| <input type="checkbox"/> | INTERPRO              | <a href="#">Ubiquitin-conjugating enzyme, E2</a>                  | RT |  | 6     | 9.3E-1  | 1.0EO     |
| <input type="checkbox"/> | INTERPRO              | <a href="#">Ubiquitin-conjugating enzyme/RWD-like</a>             | RT |  | 6     | 9.3E-1  | 1.0EO     |
| <input type="checkbox"/> | GOTERM_MF_FAT         | <a href="#">ligase activity, forming carbon-nitrogen bonds</a>    | RT |  | 16    | 9.3E-1  | 1.0EO     |
| <input type="checkbox"/> | SMART                 | <a href="#">UBCc</a>                                              | RT |  | 6     | 9.3E-1  | 1.0EO     |
| <input type="checkbox"/> | SP_PIR_KEYWORDS       | <a href="#">ligase</a>                                            | RT |  | 29    | 9.4E-1  | 1.0EO     |
| <input type="checkbox"/> | GOTERM_MF_FAT         | <a href="#">acid-amino acid ligase activity</a>                   | RT |  | 13    | 9.5E-1  | 1.0EO     |
| <input type="checkbox"/> | SP_PIR_KEYWORDS       | <a href="#">ubl conjugation pathway</a>                           | RT |  | 6     | 9.7E-1  | 1.0EO     |
|                          | Annotation Cluster 68 | Enrichment Score: 0.04                                            |    |  | Count | P_Value | Benjamini |
| <input type="checkbox"/> | GOTERM_MF_FAT         | <a href="#">phosphoprotein phosphatase activity</a>               | RT |  | 15    | 8.6E-1  | 1.0EO     |
| <input type="checkbox"/> | GOTERM_BP_FAT         | <a href="#">dephosphorylation</a>                                 | RT |  | 8     | 9.1E-1  | 1.0EO     |
| <input type="checkbox"/> | GOTERM_BP_FAT         | <a href="#">protein amino acid dephosphorylation</a>              | RT |  | 6     | 9.5E-1  | 1.0EO     |
|                          | Annotation Cluster 69 | Enrichment Score: 0.04                                            |    |  | Count | P_Value | Benjamini |
| <input type="checkbox"/> | GOTERM_BP_FAT         | <a href="#">one-carbon metabolic process</a>                      | RT |  | 6     | 8.7E-1  | 1.0EO     |
| <input type="checkbox"/> | GOTERM_BP_FAT         | <a href="#">methylation</a>                                       | RT |  | 5     | 9.2E-1  | 1.0EO     |
| <input type="checkbox"/> | GOTERM_BP_FAT         | <a href="#">biopolymer methylation</a>                            | RT |  | 3     | 9.5E-1  | 1.0EO     |
|                          | Annotation Cluster 70 | Enrichment Score: 0.04                                            |    |  | Count | P_Value | Benjamini |
| <input type="checkbox"/> | INTERPRO              | <a href="#">RecF/RecN/SMC protein, N-terminal</a>                 | RT |  | 4     | 8.0E-1  | 1.0EO     |
| <input type="checkbox"/> | GOTERM_CC_FAT         | <a href="#">chromosome</a>                                        | RT |  | 11    | 9.8E-1  | 1.0EO     |
| <input type="checkbox"/> | GOTERM_BP_FAT         | <a href="#">chromosome organization</a>                           | RT |  | 8     | 9.8E-1  | 1.0EO     |
|                          | Annotation Cluster 71 | Enrichment Score: 0.04                                            |    |  | Count | P_Value | Benjamini |
| <input type="checkbox"/> | GOTERM_MF_FAT         | <a href="#">nucleoside-triphosphatase regulator activity</a>      | RT |  | 8     | 7.3E-1  | 1.0EO     |
| <input type="checkbox"/> | GOTERM_MF_FAT         | <a href="#">small GTPase regulator activity</a>                   | RT |  | 6     | 8.8E-1  | 1.0EO     |
| <input type="checkbox"/> | GOTERM_MF_FAT         | <a href="#">GTPase regulator activity</a>                         | RT |  | 6     | 8.8E-1  | 1.0EO     |
| <input type="checkbox"/> | GOTERM_BP_FAT         | <a href="#">regulation of hydrolase activity</a>                  | RT |  | 4     | 9.3E-1  | 1.0EO     |
| <input type="checkbox"/> | GOTERM_BP_FAT         | <a href="#">regulation of GTPase activity</a>                     | RT |  | 4     | 9.3E-1  | 1.0EO     |
| <input type="checkbox"/> | GOTERM_BP_FAT         | <a href="#">regulation of Ras protein signal transduction</a>     | RT |  | 4     | 9.6E-1  | 1.0EO     |

| <input type="checkbox"/> | Term            | Definition                                                                   | RT | Count | P_Value | Benjamini         |
|--------------------------|-----------------|------------------------------------------------------------------------------|----|-------|---------|-------------------|
| <input type="checkbox"/> | GOTERM_BP_FAT   | <a href="#">regulation of small GTPase mediated signal transduction</a>      | RT | 4     | 9.6E-1  | 1.0E0             |
| <input type="checkbox"/> | GOTERM_MF_FAT   | <a href="#">enzyme activator activity</a>                                    | RT | 4     | 9.7E-1  | 1.0E0             |
| <input type="checkbox"/> | GOTERM_BP_FAT   | <a href="#">regulation of Ras GTPase activity</a>                            | RT | 3     | 9.7E-1  | 1.0E0             |
| <input type="checkbox"/> | GOTERM_MF_FAT   | <a href="#">GTPase activator activity</a>                                    | RT | 3     | 9.8E-1  | 1.0E0             |
| Annotation Cluster 72    |                 |                                                                              |    |       |         |                   |
|                          |                 | Enrichment Score: 0.03                                                       |    |       | Count   | P_Value Benjamini |
| <input type="checkbox"/> | INTERPRO        | <a href="#">RNA recognition motif, RNP-1</a>                                 | RT | 7     | 9.3E-1  | 1.0E0             |
| <input type="checkbox"/> | SMART           | <a href="#">RRM</a>                                                          | RT | 7     | 9.3E-1  | 1.0E0             |
| <input type="checkbox"/> | INTERPRO        | <a href="#">Nucleotide-binding, alpha-beta plait</a>                         | RT | 7     | 9.7E-1  | 1.0E0             |
| Annotation Cluster 73    |                 |                                                                              |    |       |         |                   |
|                          |                 | Enrichment Score: 0.02                                                       |    |       | Count   | P_Value Benjamini |
| <input type="checkbox"/> | GOTERM_MF_FAT   | <a href="#">thiolester hydrolase activity</a>                                | RT | 4     | 9.4E-1  | 1.0E0             |
| <input type="checkbox"/> | GOTERM_MF_FAT   | <a href="#">ubiquitin thiolesterase activity</a>                             | RT | 3     | 9.5E-1  | 1.0E0             |
| <input type="checkbox"/> | INTERPRO        | <a href="#">Peptidase C19, ubiquitin carboxyl-terminal hydrolase 2</a>       | RT | 3     | 9.5E-1  | 1.0E0             |
| Annotation Cluster 74    |                 |                                                                              |    |       |         |                   |
|                          |                 | Enrichment Score: 0.02                                                       |    |       | Count   | P_Value Benjamini |
| <input type="checkbox"/> | GOTERM_MF_FAT   | <a href="#">nuclease activity</a>                                            | RT | 27    | 8.5E-1  | 1.0E0             |
| <input type="checkbox"/> | GOTERM_MF_FAT   | <a href="#">DNA polymerase activity</a>                                      | RT | 17    | 9.3E-1  | 1.0E0             |
| <input type="checkbox"/> | SP_PIR_KEYWORDS | <a href="#">Endonuclease</a>                                                 | RT | 15    | 9.6E-1  | 1.0E0             |
| <input type="checkbox"/> | GOTERM_MF_FAT   | <a href="#">endonuclease activity</a>                                        | RT | 15    | 9.9E-1  | 1.0E0             |
| <input type="checkbox"/> | GOTERM_MF_FAT   | <a href="#">RNA-directed DNA polymerase activity</a>                         | RT | 10    | 9.9E-1  | 1.0E0             |
| <input type="checkbox"/> | SP_PIR_KEYWORDS | <a href="#">rna-directed dna polymerase</a>                                  | RT | 10    | 9.9E-1  | 1.0E0             |
| Annotation Cluster 75    |                 |                                                                              |    |       |         |                   |
|                          |                 | Enrichment Score: 0.02                                                       |    |       | Count   | P_Value Benjamini |
| <input type="checkbox"/> | INTERPRO        | <a href="#">Protein phosphatase 2C</a>                                       | RT | 3     | 9.5E-1  | 1.0E0             |
| <input type="checkbox"/> | INTERPRO        | <a href="#">Protein phosphatase 2C, N-terminal</a>                           | RT | 3     | 9.5E-1  | 1.0E0             |
| <input type="checkbox"/> | INTERPRO        | <a href="#">Protein phosphatase 2C-related</a>                               | RT | 3     | 9.5E-1  | 1.0E0             |
| <input type="checkbox"/> | SMART           | <a href="#">PP2C_SIG</a>                                                     | RT | 3     | 9.5E-1  | 1.0E0             |
| <input type="checkbox"/> | SMART           | <a href="#">PP2Cc</a>                                                        | RT | 3     | 9.5E-1  | 1.0E0             |
| Annotation Cluster 76    |                 |                                                                              |    |       |         |                   |
|                          |                 | Enrichment Score: 0.01                                                       |    |       | Count   | P_Value Benjamini |
| <input type="checkbox"/> | INTERPRO        | <a href="#">Like-Sm ribonucleoprotein, core</a>                              | RT | 5     | 9.6E-1  | 1.0E0             |
| <input type="checkbox"/> | INTERPRO        | <a href="#">Like-Sm ribonucleoprotein, eukaryotic and archaea-type, core</a> | RT | 3     | 9.8E-1  | 1.0E0             |
| <input type="checkbox"/> | SMART           | <a href="#">Sm</a>                                                           | RT | 3     | 9.8E-1  | 1.0E0             |
| Annotation Cluster 77    |                 |                                                                              |    |       |         |                   |
|                          |                 | Enrichment Score: 0.01                                                       |    |       | Count   | P_Value Benjamini |
| <input type="checkbox"/> | SP_PIR_KEYWORDS | <a href="#">Initiation factor</a>                                            | RT | 9     | 9.7E-1  | 1.0E0             |
| <input type="checkbox"/> | GOTERM_MF_FAT   | <a href="#">translation initiation factor activity</a>                       | RT | 11    | 9.8E-1  | 1.0E0             |
| <input type="checkbox"/> | GOTERM_BP_FAT   | <a href="#">translational initiation</a>                                     | RT | 4     | 9.9E-1  | 1.0E0             |
| <input type="checkbox"/> | GOTERM_MF_FAT   | <a href="#">translation factor activity, nucleic acid binding</a>            | RT | 12    | 1.0E0   | 1.0E0             |
| Annotation Cluster 78    |                 |                                                                              |    |       |         |                   |
|                          |                 | Enrichment Score: 0.01                                                       |    |       | Count   | P_Value Benjamini |
| <input type="checkbox"/> | GOTERM_BP_FAT   | <a href="#">protein polymerization</a>                                       | RT | 4     | 9.3E-1  | 1.0E0             |
| <input type="checkbox"/> | INTERPRO        | <a href="#">Tubulin/FtsZ, GTPase domain</a>                                  | RT | 4     | 9.4E-1  | 1.0E0             |
| <input type="checkbox"/> | INTERPRO        | <a href="#">Tubulin</a>                                                      | RT | 4     | 9.4E-1  | 1.0E0             |
| <input type="checkbox"/> | INTERPRO        | <a href="#">Tubulin, conserved site</a>                                      | RT | 4     | 9.4E-1  | 1.0E0             |
| <input type="checkbox"/> | PIR_SUPERFAMILY | PIRSF002306:tubulin                                                          | RT | 3     | 9.8E-1  | 1.0E0             |
| <input type="checkbox"/> | INTERPRO        | <a href="#">Tubulin/FtsZ, 2-layer sandwich domain</a>                        | RT | 3     | 9.8E-1  | 1.0E0             |
| <input type="checkbox"/> | GOTERM_BP_FAT   | <a href="#">chromosome organization</a>                                      | RT | 8     | 9.8E-1  | 1.0E0             |
| <input type="checkbox"/> | GOTERM_BP_FAT   | <a href="#">protein complex biogenesis</a>                                   | RT | 5     | 9.9E-1  | 1.0E0             |
| <input type="checkbox"/> | GOTERM_BP_FAT   | <a href="#">protein complex assembly</a>                                     | RT | 5     | 9.9E-1  | 1.0E0             |
| <input type="checkbox"/> | GOTERM_BP_FAT   | <a href="#">cellular protein complex assembly</a>                            | RT | 4     | 9.9E-1  | 1.0E0             |
| <input type="checkbox"/> | GOTERM_BP_FAT   | <a href="#">chromatin organization</a>                                       | RT | 5     | 1.0E0   | 1.0E0             |
| <input type="checkbox"/> | GOTERM_CC_FAT   | <a href="#">nucleosome</a>                                                   | RT | 3     | 1.0E0   | 1.0E0             |
| <input type="checkbox"/> | GOTERM_BP_FAT   | <a href="#">chromatin assembly or disassembly</a>                            | RT | 4     | 1.0E0   | 1.0E0             |
| <input type="checkbox"/> | GOTERM_CC_FAT   | <a href="#">chromosomal part</a>                                             | RT | 5     | 1.0E0   | 1.0E0             |
| <input type="checkbox"/> | GOTERM_BP_FAT   | <a href="#">macromolecular complex assembly</a>                              | RT | 9     | 1.0E0   | 1.0E0             |
| <input type="checkbox"/> | GOTERM_CC_FAT   | <a href="#">chromatin</a>                                                    | RT | 3     | 1.0E0   | 1.0E0             |
| <input type="checkbox"/> | GOTERM_BP_FAT   | <a href="#">chromatin assembly</a>                                           | RT | 3     | 1.0E0   | 1.0E0             |
| <input type="checkbox"/> | GOTERM_BP_FAT   | <a href="#">protein-DNA complex assembly</a>                                 | RT | 3     | 1.0E0   | 1.0E0             |
| <input type="checkbox"/> | GOTERM_BP_FAT   | <a href="#">nucleosome organization</a>                                      | RT | 3     | 1.0E0   | 1.0E0             |
| <input type="checkbox"/> | GOTERM_BP_FAT   | <a href="#">DNA packaging</a>                                                | RT | 3     | 1.0E0   | 1.0E0             |
| <input type="checkbox"/> | GOTERM_BP_FAT   | <a href="#">nucleosome assembly</a>                                          | RT | 3     | 1.0E0   | 1.0E0             |
| <input type="checkbox"/> | GOTERM_BP_FAT   | <a href="#">cellular macromolecular complex assembly</a>                     | RT | 8     | 1.0E0   | 1.0E0             |
| <input type="checkbox"/> | INTERPRO        | <a href="#">Histone core</a>                                                 | RT | 3     | 1.0E0   | 1.0E0             |

|                          |                       |                                                                      |    |  |  |       |         |           |
|--------------------------|-----------------------|----------------------------------------------------------------------|----|--|--|-------|---------|-----------|
| <input type="checkbox"/> |                       |                                                                      |    |  |  |       |         |           |
| <input type="checkbox"/> | GOTERM_BP_FAT         | <a href="#">macromolecular complex subunit organization</a>          | RT |  |  | 9     | 1.0E0   | 1.0E0     |
| <input type="checkbox"/> | GOTERM_BP_FAT         | <a href="#">cellular macromolecular complex subunit organization</a> | RT |  |  | 8     | 1.0E0   | 1.0E0     |
| <input type="checkbox"/> | SP_PIR_KEYWORDS       | <a href="#">chromosomal protein</a>                                  | RT |  |  | 3     | 1.0E0   | 1.0E0     |
| <input type="checkbox"/> | GOTERM_CC_FAT         | <a href="#">protein-DNA complex</a>                                  | RT |  |  | 3     | 1.0E0   | 1.0E0     |
| <input type="checkbox"/> | INTERPRO              | <a href="#">Histone-fold</a>                                         | RT |  |  | 3     | 1.0E0   | 1.0E0     |
|                          | Annotation Cluster 79 | Enrichment Score: 0                                                  |    |  |  | Count | P-Value | Benjamini |
| <input type="checkbox"/> | INTERPRO              | <a href="#">Zinc finger, C2H2-like</a>                               | RT |  |  | 7     | 9.9E-1  | 1.0E0     |
| <input type="checkbox"/> | INTERPRO              | <a href="#">Zinc finger, C2H2-type</a>                               | RT |  |  | 7     | 9.9E-1  | 1.0E0     |
| <input type="checkbox"/> | SMART                 | <a href="#">ZnF_C2H2</a>                                             | RT |  |  | 7     | 9.9E-1  | 1.0E0     |

201 terms were not clustered.

Please cite [Nature Protocols 2009; 4\(1\):44](#) & [Genome Biology 2003; 4\(5\):P3](#) within any publication that makes use of any methods inspired by DAVID.

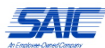

SAIC Frederick  
A Division of Science & Applications  
International Corporation

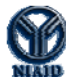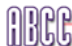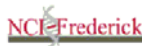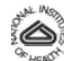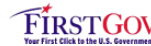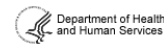

[Term of Service](#) | [Contact Us](#) | [Site Map](#)



## Functional Annotation Clustering

[Help and Manual](#)

Current Gene List: 3\_Random10

Current Background: Giardia intestinalis

3000 DAVID IDs

Options Classification Stringency Medium

Rerun using options

Create Sublist

83 Cluster(s)

[Download File](#)

|                          | Annotation Cluster 1 | Enrichment Score: 1.03                                              |    |  | Count | P_Value | Benjamini |
|--------------------------|----------------------|---------------------------------------------------------------------|----|--|-------|---------|-----------|
| <input type="checkbox"/> | GOTERM_BP_FAT        | <a href="#">cytoskeleton organization</a>                           | RT |  | 14    | 4.3E-2  | 1.0E0     |
| <input type="checkbox"/> | SP_PIR_KEYWORDS      | <a href="#">annexin</a>                                             | RT |  | 14    | 4.3E-2  | 9.9E-1    |
| <input type="checkbox"/> | GOTERM_MF_FAT        | <a href="#">calcium-dependent phospholipid binding</a>              | RT |  | 18    | 4.6E-2  | 1.0E0     |
| <input type="checkbox"/> | INTERPRO             | <a href="#">Annexin</a>                                             | RT |  | 14    | 5.0E-2  | 1.0E0     |
| <input type="checkbox"/> | INTERPRO             | <a href="#">Alpha giardin</a>                                       | RT |  | 11    | 6.8E-2  | 1.0E0     |
| <input type="checkbox"/> | SMART                | <a href="#">ANX</a>                                                 | RT |  | 12    | 9.9E-2  | 1.0E0     |
| <input type="checkbox"/> | INTERPRO             | <a href="#">Annexin repeat</a>                                      | RT |  | 12    | 1.0E-1  | 1.0E0     |
| <input type="checkbox"/> | GOTERM_MF_FAT        | <a href="#">calcium ion binding</a>                                 | RT |  | 30    | 1.2E-1  | 1.0E0     |
| <input type="checkbox"/> | GOTERM_MF_FAT        | <a href="#">phospholipid binding</a>                                | RT |  | 18    | 3.6E-1  | 1.0E0     |
| <input type="checkbox"/> | GOTERM_MF_FAT        | <a href="#">lipid binding</a>                                       | RT |  | 23    | 4.1E-1  | 1.0E0     |
|                          | Annotation Cluster 2 | Enrichment Score: 0.66                                              |    |  | Count | P_Value | Benjamini |
| <input type="checkbox"/> | GOTERM_BP_FAT        | <a href="#">protein localization</a>                                | RT |  | 25    | 8.1E-2  | 1.0E0     |
| <input type="checkbox"/> | GOTERM_BP_FAT        | <a href="#">intracellular transport</a>                             | RT |  | 21    | 9.3E-2  | 1.0E0     |
| <input type="checkbox"/> | GOTERM_BP_FAT        | <a href="#">protein transport</a>                                   | RT |  | 24    | 1.0E-1  | 1.0E0     |
| <input type="checkbox"/> | GOTERM_BP_FAT        | <a href="#">establishment of protein localization</a>               | RT |  | 24    | 1.0E-1  | 1.0E0     |
| <input type="checkbox"/> | GOTERM_BP_FAT        | <a href="#">intracellular protein transport</a>                     | RT |  | 17    | 1.7E-1  | 1.0E0     |
| <input type="checkbox"/> | GOTERM_BP_FAT        | <a href="#">cellular protein localization</a>                       | RT |  | 17    | 1.7E-1  | 1.0E0     |
| <input type="checkbox"/> | GOTERM_BP_FAT        | <a href="#">cellular macromolecule localization</a>                 | RT |  | 17    | 1.7E-1  | 1.0E0     |
| <input type="checkbox"/> | GOTERM_CC_FAT        | <a href="#">Golgi apparatus</a>                                     | RT |  | 9     | 2.7E-1  | 1.0E0     |
| <input type="checkbox"/> | GOTERM_BP_FAT        | <a href="#">vesicle-mediated transport</a>                          | RT |  | 19    | 3.8E-1  | 1.0E0     |
| <input type="checkbox"/> | INTERPRO             | <a href="#">Clathrin/coatomer adaptor, adaptin-like, N-terminal</a> | RT |  | 4     | 6.6E-1  | 1.0E0     |
| <input type="checkbox"/> | GOTERM_CC_FAT        | <a href="#">coated membrane</a>                                     | RT |  | 9     | 6.7E-1  | 1.0E0     |
| <input type="checkbox"/> | GOTERM_CC_FAT        | <a href="#">membrane coat</a>                                       | RT |  | 9     | 6.7E-1  | 1.0E0     |
|                          | Annotation Cluster 3 | Enrichment Score: 0.63                                              |    |  | Count | P_Value | Benjamini |
| <input type="checkbox"/> | GOTERM_CC_FAT        | <a href="#">integral to membrane</a>                                | RT |  | 44    | 1.6E-1  | 1.0E0     |
| <input type="checkbox"/> | GOTERM_CC_FAT        | <a href="#">intrinsic to membrane</a>                               | RT |  | 44    | 1.6E-1  | 1.0E0     |
| <input type="checkbox"/> | SP_PIR_KEYWORDS      | <a href="#">transmembrane</a>                                       | RT |  | 20    | 3.3E-1  | 1.0E0     |
| <input type="checkbox"/> | SP_PIR_KEYWORDS      | <a href="#">membrane</a>                                            | RT |  | 18    | 3.6E-1  | 1.0E0     |
|                          | Annotation Cluster 4 | Enrichment Score: 0.62                                              |    |  | Count | P_Value | Benjamini |
| <input type="checkbox"/> | SMART                | <a href="#">AAA</a>                                                 | RT |  | 47    | 1.6E-1  | 1.0E0     |
| <input type="checkbox"/> | INTERPRO             | <a href="#">ATPase, AAA+ type, core</a>                             | RT |  | 47    | 1.6E-1  | 1.0E0     |
| <input type="checkbox"/> | INTERPRO             | <a href="#">ATPase, AAA-type, core</a>                              | RT |  | 16    | 5.2E-1  | 1.0E0     |
|                          | Annotation Cluster 5 | Enrichment Score: 0.51                                              |    |  | Count | P_Value | Benjamini |
| <input type="checkbox"/> | INTERPRO             | <a href="#">AMP-dependent synthetase and ligase</a>                 | RT |  | 7     | 1.4E-1  | 1.0E0     |
| <input type="checkbox"/> | GOTERM_MF_FAT        | <a href="#">fatty acid ligase activity</a>                          | RT |  | 5     | 3.0E-1  | 1.0E0     |
| <input type="checkbox"/> | GOTERM_MF_FAT        | <a href="#">long-chain fatty acid-CoA ligase activity</a>           | RT |  | 5     | 3.0E-1  | 1.0E0     |
| <input type="checkbox"/> | GOTERM_MF_FAT        | <a href="#">ligase activity, forming carbon-sulfur bonds</a>        | RT |  | 5     | 3.0E-1  | 1.0E0     |
| <input type="checkbox"/> | COG_ONTOLOGY         | <a href="#">Lipid metabolism</a>                                    | RT |  | 8     | 7.3E-1  | 9.9E-1    |
|                          | Annotation Cluster 6 | Enrichment Score: 0.43                                              |    |  | Count | P_Value | Benjamini |
| <input type="checkbox"/> | GOTERM_BP_FAT        | <a href="#">chromatin assembly</a>                                  | RT |  | 9     | 2.4E-1  | 1.0E0     |
| <input type="checkbox"/> | GOTERM_BP_FAT        | <a href="#">protein-DNA complex assembly</a>                        | RT |  | 9     | 2.4E-1  | 1.0E0     |
| <input type="checkbox"/> | GOTERM_BP_FAT        | <a href="#">DNA packaging</a>                                       | RT |  | 9     | 2.4E-1  | 1.0E0     |
| <input type="checkbox"/> | GOTERM_BP_FAT        | <a href="#">nucleosome assembly</a>                                 | RT |  | 9     | 2.4E-1  | 1.0E0     |
| <input type="checkbox"/> | GOTERM_BP_FAT        | <a href="#">nucleosome organization</a>                             | RT |  | 9     | 2.4E-1  | 1.0E0     |
| <input type="checkbox"/> | INTERPRO             | <a href="#">Histone-fold</a>                                        | RT |  | 11    | 2.4E-1  | 1.0E0     |



|                          |                       |                                                                                     |    |  |       |         |           |
|--------------------------|-----------------------|-------------------------------------------------------------------------------------|----|--|-------|---------|-----------|
| <input type="checkbox"/> | SP_PIR_KEYWORDS       | <a href="#">chromosomal protein</a>                                                 | RT |  | 9     | 2.4E-1  | 1.0E0     |
| <input type="checkbox"/> | SP_PIR_KEYWORDS       | <a href="#">nucleus</a>                                                             | RT |  | 23    | 2.5E-1  | 1.0E0     |
| <input type="checkbox"/> | INTERPRO              | <a href="#">Histone core</a>                                                        | RT |  | 9     | 2.6E-1  | 1.0E0     |
| <input type="checkbox"/> | GOTERM_CC_FAT         | <a href="#">nucleosome</a>                                                          | RT |  | 9     | 2.7E-1  | 1.0E0     |
| <input type="checkbox"/> | GOTERM_BP_FAT         | <a href="#">chromatin assembly or disassembly</a>                                   | RT |  | 10    | 2.9E-1  | 1.0E0     |
| <input type="checkbox"/> | SP_PIR_KEYWORDS       | <a href="#">dna-binding</a>                                                         | RT |  | 23    | 3.2E-1  | 1.0E0     |
| <input type="checkbox"/> | GOTERM_CC_FAT         | <a href="#">protein-DNA complex</a>                                                 | RT |  | 10    | 3.2E-1  | 1.0E0     |
| <input type="checkbox"/> | GOTERM_BP_FAT         | <a href="#">cellular macromolecular complex subunit organization</a>                | RT |  | 17    | 3.3E-1  | 1.0E0     |
| <input type="checkbox"/> | GOTERM_BP_FAT         | <a href="#">chromatin organization</a>                                              | RT |  | 11    | 3.3E-1  | 1.0E0     |
| <input type="checkbox"/> | GOTERM_BP_FAT         | <a href="#">macromolecular complex subunit organization</a>                         | RT |  | 18    | 3.6E-1  | 1.0E0     |
| <input type="checkbox"/> | SP_PIR_KEYWORDS       | <a href="#">nucleosome core</a>                                                     | RT |  | 6     | 3.7E-1  | 1.0E0     |
| <input type="checkbox"/> | GOTERM_BP_FAT         | <a href="#">cellular macromolecular complex assembly</a>                            | RT |  | 16    | 3.9E-1  | 1.0E0     |
| <input type="checkbox"/> | GOTERM_CC_FAT         | <a href="#">chromatin</a>                                                           | RT |  | 9     | 4.1E-1  | 1.0E0     |
| <input type="checkbox"/> | GOTERM_CC_FAT         | <a href="#">chromosomal part</a>                                                    | RT |  | 12    | 4.1E-1  | 1.0E0     |
| <input type="checkbox"/> | GOTERM_BP_FAT         | <a href="#">macromolecular complex assembly</a>                                     | RT |  | 17    | 4.2E-1  | 1.0E0     |
| <input type="checkbox"/> | GOTERM_BP_FAT         | <a href="#">chromosome organization</a>                                             | RT |  | 12    | 5.8E-1  | 1.0E0     |
| <input type="checkbox"/> | SMART                 | <a href="#">H4</a>                                                                  | RT |  | 3     | 6.2E-1  | 1.0E0     |
| <input type="checkbox"/> | INTERPRO              | <a href="#">Histone H4</a>                                                          | RT |  | 3     | 6.3E-1  | 1.0E0     |
| <input type="checkbox"/> | PIR_SUPERFAMILY       | PIRSF002052:histone H4                                                              | RT |  | 3     | 6.3E-1  | 1.0E0     |
| <input type="checkbox"/> | SMART                 | <a href="#">H3</a>                                                                  | RT |  | 3     | 8.0E-1  | 1.0E0     |
| <input type="checkbox"/> | INTERPRO              | <a href="#">Histone H3</a>                                                          | RT |  | 3     | 8.0E-1  | 1.0E0     |
| <input type="checkbox"/> | GOTERM_CC_FAT         | <a href="#">chromosome</a>                                                          | RT |  | 14    | 9.2E-1  | 1.0E0     |
|                          | Annotation Cluster 7  | Enrichment Score: 0.43                                                              |    |  | Count | P_Value | Benjamini |
| <input type="checkbox"/> | SMART                 | <a href="#">ANK</a>                                                                 | RT |  | 259   | 3.0E-1  | 1.0E0     |
| <input type="checkbox"/> | INTERPRO              | <a href="#">Ankyrin</a>                                                             | RT |  | 259   | 3.4E-1  | 1.0E0     |
| <input type="checkbox"/> | SP_PIR_KEYWORDS       | <a href="#">ank repeat</a>                                                          | RT |  | 177   | 5.0E-1  | 1.0E0     |
|                          | Annotation Cluster 8  | Enrichment Score: 0.41                                                              |    |  | Count | P_Value | Benjamini |
| <input type="checkbox"/> | SMART                 | <a href="#">UBQ</a>                                                                 | RT |  | 6     | 3.8E-1  | 1.0E0     |
| <input type="checkbox"/> | INTERPRO              | <a href="#">Ubiquitin</a>                                                           | RT |  | 6     | 3.9E-1  | 1.0E0     |
| <input type="checkbox"/> | INTERPRO              | <a href="#">Ubiquitin supergroup</a>                                                | RT |  | 9     | 3.9E-1  | 1.0E0     |
|                          | Annotation Cluster 9  | Enrichment Score: 0.41                                                              |    |  | Count | P_Value | Benjamini |
| <input type="checkbox"/> | GOTERM_MF_FAT         | <a href="#">protein kinase regulator activity</a>                                   | RT |  | 6     | 3.7E-1  | 1.0E0     |
| <input type="checkbox"/> | GOTERM_MF_FAT         | <a href="#">kinase regulator activity</a>                                           | RT |  | 6     | 3.7E-1  | 1.0E0     |
| <input type="checkbox"/> | GOTERM_MF_FAT         | <a href="#">cAMP-dependent protein kinase regulator activity</a>                    | RT |  | 4     | 4.4E-1  | 1.0E0     |
|                          | Annotation Cluster 10 | Enrichment Score: 0.4                                                               |    |  | Count | P_Value | Benjamini |
| <input type="checkbox"/> | PIR_SUPERFAMILY       | PIRSF001711:ADP-ribosylation factor                                                 | RT |  | 5     | 3.2E-1  | 1.0E0     |
| <input type="checkbox"/> | INTERPRO              | <a href="#">ARF/SAR superfamily</a>                                                 | RT |  | 6     | 3.9E-1  | 1.0E0     |
| <input type="checkbox"/> | SMART                 | <a href="#">ARF</a>                                                                 | RT |  | 4     | 4.5E-1  | 1.0E0     |
| <input type="checkbox"/> | INTERPRO              | <a href="#">ADP-ribosylation factor</a>                                             | RT |  | 4     | 4.5E-1  | 1.0E0     |
|                          | Annotation Cluster 11 | Enrichment Score: 0.39                                                              |    |  | Count | P_Value | Benjamini |
| <input type="checkbox"/> | GOTERM_BP_FAT         | <a href="#">intracellular signaling cascade</a>                                     | RT |  | 16    | 1.4E-1  | 1.0E0     |
| <input type="checkbox"/> | GOTERM_BP_FAT         | <a href="#">small GTPase mediated signal transduction</a>                           | RT |  | 12    | 2.6E-1  | 1.0E0     |
| <input type="checkbox"/> | GOTERM_MF_FAT         | <a href="#">guanyl ribonucleotide binding</a>                                       | RT |  | 31    | 3.0E-1  | 1.0E0     |
| <input type="checkbox"/> | GOTERM_MF_FAT         | <a href="#">GTP binding</a>                                                         | RT |  | 31    | 3.0E-1  | 1.0E0     |
| <input type="checkbox"/> | GOTERM_MF_FAT         | <a href="#">guanyl nucleotide binding</a>                                           | RT |  | 31    | 3.0E-1  | 1.0E0     |
| <input type="checkbox"/> | INTERPRO              | <a href="#">Small GTP-binding protein</a>                                           | RT |  | 14    | 3.6E-1  | 1.0E0     |
| <input type="checkbox"/> | INTERPRO              | <a href="#">Ras</a>                                                                 | RT |  | 9     | 3.9E-1  | 1.0E0     |
| <input type="checkbox"/> | INTERPRO              | <a href="#">Ras GTPase</a>                                                          | RT |  | 9     | 5.3E-1  | 1.0E0     |
| <input type="checkbox"/> | SP_PIR_KEYWORDS       | <a href="#">gtp-binding</a>                                                         | RT |  | 24    | 5.7E-1  | 9.9E-1    |
| <input type="checkbox"/> | SMART                 | <a href="#">RAB</a>                                                                 | RT |  | 3     | 8.0E-1  | 1.0E0     |
| <input type="checkbox"/> | INTERPRO              | <a href="#">Ras small GTPase_Rab type</a>                                           | RT |  | 3     | 8.0E-1  | 1.0E0     |
| <input type="checkbox"/> | PIR_SUPERFAMILY       | PIRSF001710:Ras-related protein Rab                                                 | RT |  | 4     | 8.1E-1  | 1.0E0     |
|                          | Annotation Cluster 12 | Enrichment Score: 0.35                                                              |    |  | Count | P_Value | Benjamini |
| <input type="checkbox"/> | COG_ONTOLOGY          | <a href="#">Nucleotide transport and metabolism</a>                                 | RT |  | 8     | 8.7E-2  | 9.5E-1    |
| <input type="checkbox"/> | GOTERM_BP_FAT         | <a href="#">nucleotide catabolic process</a>                                        | RT |  | 4     | 4.3E-1  | 1.0E0     |
| <input type="checkbox"/> | GOTERM_BP_FAT         | <a href="#">nucleobase_nucleoside_nucleotide and nucleic acid catabolic process</a> | RT |  | 5     | 4.9E-1  | 1.0E0     |
| <input type="checkbox"/> | GOTERM_BP_FAT         | <a href="#">nucleobase_nucleoside and nucleotide catabolic process</a>              | RT |  | 5     | 4.9E-1  | 1.0E0     |

| <input type="checkbox"/> | Annotation            | Term                                                                                                | RT | Count | P_Value | Benjamini |
|--------------------------|-----------------------|-----------------------------------------------------------------------------------------------------|----|-------|---------|-----------|
| <input type="checkbox"/> | GOTERM_BP_FAT         | <a href="#">nitrogen compound catabolic process</a>                                                 | RT | 5     | 4.9E-1  | 1.0EO     |
| <input type="checkbox"/> | INTERPRO              | <a href="#">5'-Nucleotidase and apyrase</a>                                                         | RT | 3     | 6.3E-1  | 1.0EO     |
| <input type="checkbox"/> | INTERPRO              | <a href="#">Predicted phosphoesterase_C1039.02 type</a>                                             | RT | 3     | 6.3E-1  | 1.0EO     |
| <input type="checkbox"/> | PIR_SUPERFAMILY       | PIRSF017316:phosphoesterase, C1039.02 type                                                          | RT | 3     | 6.3E-1  | 1.0EO     |
| <input type="checkbox"/> | PIR_SUPERFAMILY       | PIRSF017316:Pesterase_C1039                                                                         | RT | 3     | 6.3E-1  | 1.0EO     |
|                          | Annotation Cluster 13 | Enrichment Score: 0.35                                                                              |    |       |         |           |
| <input type="checkbox"/> | SMART                 | <a href="#">RRM</a>                                                                                 | RT | 10    | 4.3E-1  | 1.0EO     |
| <input type="checkbox"/> | INTERPRO              | <a href="#">RNA recognition motif_RNP-1</a>                                                         | RT | 10    | 4.4E-1  | 1.0EO     |
| <input type="checkbox"/> | INTERPRO              | <a href="#">Nucleotide-binding_alpha-beta plait</a>                                                 | RT | 11    | 4.8E-1  | 1.0EO     |
|                          | Annotation Cluster 14 | Enrichment Score: 0.34                                                                              |    |       |         |           |
| <input type="checkbox"/> | SMART                 | <a href="#">VWA</a>                                                                                 | RT | 6     | 3.8E-1  | 1.0EO     |
| <input type="checkbox"/> | INTERPRO              | <a href="#">von Willebrand factor_type A</a>                                                        | RT | 6     | 3.9E-1  | 1.0EO     |
| <input type="checkbox"/> | INTERPRO              | <a href="#">Copine</a>                                                                              | RT | 4     | 6.6E-1  | 1.0EO     |
|                          | Annotation Cluster 15 | Enrichment Score: 0.31                                                                              |    |       |         |           |
| <input type="checkbox"/> | GOTERM_CC_FAT         | <a href="#">organelle membrane</a>                                                                  | RT | 9     | 2.7E-1  | 1.0EO     |
| <input type="checkbox"/> | GOTERM_CC_FAT         | <a href="#">Golgi apparatus</a>                                                                     | RT | 9     | 2.7E-1  | 1.0EO     |
| <input type="checkbox"/> | GOTERM_CC_FAT         | <a href="#">endomembrane system</a>                                                                 | RT | 12    | 3.0E-1  | 1.0EO     |
| <input type="checkbox"/> | GOTERM_CC_FAT         | <a href="#">ER to Golgi transport vesicle membrane</a>                                              | RT | 4     | 4.6E-1  | 1.0EO     |
| <input type="checkbox"/> | GOTERM_CC_FAT         | <a href="#">ER to Golgi transport vesicle</a>                                                       | RT | 4     | 4.6E-1  | 1.0EO     |
| <input type="checkbox"/> | GOTERM_CC_FAT         | <a href="#">COPII vesicle coat</a>                                                                  | RT | 4     | 4.6E-1  | 1.0EO     |
| <input type="checkbox"/> | GOTERM_BP_FAT         | <a href="#">ER to Golgi vesicle-mediated transport</a>                                              | RT | 5     | 4.9E-1  | 1.0EO     |
| <input type="checkbox"/> | GOTERM_BP_FAT         | <a href="#">Golgi vesicle transport</a>                                                             | RT | 5     | 4.9E-1  | 1.0EO     |
| <input type="checkbox"/> | GOTERM_CC_FAT         | <a href="#">cytoplasmic membrane-bounded vesicle</a>                                                | RT | 5     | 5.2E-1  | 1.0EO     |
| <input type="checkbox"/> | GOTERM_CC_FAT         | <a href="#">vesicle membrane</a>                                                                    | RT | 5     | 5.2E-1  | 1.0EO     |
| <input type="checkbox"/> | GOTERM_CC_FAT         | <a href="#">membrane-bounded vesicle</a>                                                            | RT | 5     | 5.2E-1  | 1.0EO     |
| <input type="checkbox"/> | GOTERM_CC_FAT         | <a href="#">cytoplasmic vesicle</a>                                                                 | RT | 5     | 5.2E-1  | 1.0EO     |
| <input type="checkbox"/> | GOTERM_CC_FAT         | <a href="#">vesicle</a>                                                                             | RT | 5     | 5.2E-1  | 1.0EO     |
| <input type="checkbox"/> | GOTERM_CC_FAT         | <a href="#">cytoplasmic vesicle membrane</a>                                                        | RT | 5     | 5.2E-1  | 1.0EO     |
| <input type="checkbox"/> | GOTERM_CC_FAT         | <a href="#">coated vesicle membrane</a>                                                             | RT | 5     | 5.2E-1  | 1.0EO     |
| <input type="checkbox"/> | GOTERM_CC_FAT         | <a href="#">coated vesicle</a>                                                                      | RT | 5     | 5.2E-1  | 1.0EO     |
| <input type="checkbox"/> | GOTERM_CC_FAT         | <a href="#">cytoplasmic vesicle part</a>                                                            | RT | 5     | 5.2E-1  | 1.0EO     |
| <input type="checkbox"/> | GOTERM_CC_FAT         | <a href="#">vesicle coat</a>                                                                        | RT | 5     | 5.2E-1  | 1.0EO     |
| <input type="checkbox"/> | GOTERM_CC_FAT         | <a href="#">Golgi apparatus part</a>                                                                | RT | 6     | 5.7E-1  | 1.0EO     |
| <input type="checkbox"/> | GOTERM_CC_FAT         | <a href="#">transport vesicle membrane</a>                                                          | RT | 4     | 6.7E-1  | 1.0EO     |
| <input type="checkbox"/> | GOTERM_CC_FAT         | <a href="#">transport vesicle</a>                                                                   | RT | 4     | 6.7E-1  | 1.0EO     |
| <input type="checkbox"/> | GOTERM_CC_FAT         | <a href="#">coated membrane</a>                                                                     | RT | 9     | 6.7E-1  | 1.0EO     |
| <input type="checkbox"/> | GOTERM_CC_FAT         | <a href="#">membrane coat</a>                                                                       | RT | 9     | 6.7E-1  | 1.0EO     |
|                          | Annotation Cluster 16 | Enrichment Score: 0.29                                                                              |    |       |         |           |
| <input type="checkbox"/> | GOTERM_MF_FAT         | <a href="#">nucleobase_nucleoside_nucleotide kinase activity</a>                                    | RT | 8     | 3.3E-1  | 1.0EO     |
| <input type="checkbox"/> | GOTERM_MF_FAT         | <a href="#">nucleotide kinase activity</a>                                                          | RT | 4     | 6.4E-1  | 1.0EO     |
| <input type="checkbox"/> | GOTERM_MF_FAT         | <a href="#">phosphotransferase activity_phosphate group as acceptor</a>                             | RT | 5     | 6.6E-1  | 1.0EO     |
|                          | Annotation Cluster 17 | Enrichment Score: 0.27                                                                              |    |       |         |           |
| <input type="checkbox"/> | GOTERM_BP_FAT         | <a href="#">purine nucleotide metabolic process</a>                                                 | RT | 20    | 3.2E-1  | 1.0EO     |
| <input type="checkbox"/> | GOTERM_BP_FAT         | <a href="#">ATP metabolic process</a>                                                               | RT | 17    | 3.3E-1  | 1.0EO     |
| <input type="checkbox"/> | GOTERM_BP_FAT         | <a href="#">ATP biosynthetic process</a>                                                            | RT | 17    | 3.3E-1  | 1.0EO     |
| <input type="checkbox"/> | GOTERM_BP_FAT         | <a href="#">nucleoside triphosphate biosynthetic process</a>                                        | RT | 18    | 3.6E-1  | 1.0EO     |
| <input type="checkbox"/> | GOTERM_BP_FAT         | <a href="#">nucleoside triphosphate metabolic process</a>                                           | RT | 18    | 3.6E-1  | 1.0EO     |
| <input type="checkbox"/> | GOTERM_BP_FAT         | <a href="#">purine nucleoside triphosphate biosynthetic process</a>                                 | RT | 18    | 3.6E-1  | 1.0EO     |
| <input type="checkbox"/> | GOTERM_BP_FAT         | <a href="#">purine nucleoside triphosphate metabolic process</a>                                    | RT | 18    | 3.6E-1  | 1.0EO     |
| <input type="checkbox"/> | GOTERM_BP_FAT         | <a href="#">ribonucleoside triphosphate metabolic process</a>                                       | RT | 18    | 3.6E-1  | 1.0EO     |
| <input type="checkbox"/> | GOTERM_BP_FAT         | <a href="#">ribonucleoside triphosphate biosynthetic process</a>                                    | RT | 18    | 3.6E-1  | 1.0EO     |
| <input type="checkbox"/> | GOTERM_BP_FAT         | <a href="#">purine ribonucleoside triphosphate metabolic process</a>                                | RT | 18    | 3.6E-1  | 1.0EO     |
| <input type="checkbox"/> | GOTERM_BP_FAT         | <a href="#">purine ribonucleoside triphosphate biosynthetic process</a>                             | RT | 18    | 3.6E-1  | 1.0EO     |
| <input type="checkbox"/> | GOTERM_MF_FAT         | <a href="#">ATPase activity_coupled to transmembrane movement of ions_phosphorylative mechanism</a> | RT | 9     | 3.7E-1  | 1.0EO     |
| <input type="checkbox"/> | GOTERM_BP_FAT         | <a href="#">purine nucleotide biosynthetic process</a>                                              | RT | 19    | 3.8E-1  | 1.0EO     |

|                          |                 |                                                                                                                |    |  |                        |        |        |       |         |           |
|--------------------------|-----------------|----------------------------------------------------------------------------------------------------------------|----|--|------------------------|--------|--------|-------|---------|-----------|
| <input type="checkbox"/> | GOTERM_BP_FAT   | <a href="#">ion transport</a>                                                                                  | RT |  | 16                     | 3.9E-1 | 1.0E0  |       |         |           |
| <input type="checkbox"/> | GOTERM_BP_FAT   | <a href="#">cation transport</a>                                                                               | RT |  | 16                     | 3.9E-1 | 1.0E0  |       |         |           |
| <input type="checkbox"/> | INTERPRO        | <a href="#">ATPase, P-type, K/Mg/Cd/Cu/Zn/Na/Ca/Na/H-transporter</a>                                           | RT |  | 9                      | 3.9E-1 | 1.0E0  |       |         |           |
| <input type="checkbox"/> | GOTERM_BP_FAT   | <a href="#">purine ribonucleotide metabolic process</a>                                                        | RT |  | 18                     | 4.4E-1 | 1.0E0  |       |         |           |
| <input type="checkbox"/> | GOTERM_BP_FAT   | <a href="#">purine ribonucleotide biosynthetic process</a>                                                     | RT |  | 18                     | 4.4E-1 | 1.0E0  |       |         |           |
| <input type="checkbox"/> | GOTERM_BP_FAT   | <a href="#">ribonucleotide metabolic process</a>                                                               | RT |  | 18                     | 4.4E-1 | 1.0E0  |       |         |           |
| <input type="checkbox"/> | GOTERM_BP_FAT   | <a href="#">ribonucleotide biosynthetic process</a>                                                            | RT |  | 18                     | 4.4E-1 | 1.0E0  |       |         |           |
| <input type="checkbox"/> | GOTERM_CC_FAT   | <a href="#">proton-transporting V-type ATPase complex</a>                                                      | RT |  | 7                      | 4.6E-1 | 1.0E0  |       |         |           |
| <input type="checkbox"/> | GOTERM_MF_FAT   | <a href="#">inorganic cation transmembrane transporter activity</a>                                            | RT |  | 12                     | 4.8E-1 | 1.0E0  |       |         |           |
| <input type="checkbox"/> | INTERPRO        | <a href="#">ATPase, P-type, ATPase-associated region</a>                                                       | RT |  | 8                      | 4.9E-1 | 1.0E0  |       |         |           |
| <input type="checkbox"/> | GOTERM_BP_FAT   | <a href="#">nucleotide biosynthetic process</a>                                                                | RT |  | 24                     | 5.0E-1 | 1.0E0  |       |         |           |
| <input type="checkbox"/> | GOTERM_CC_FAT   | <a href="#">proton-transporting two-sector ATPase complex, proton-transporting domain</a>                      | RT |  | 5                      | 5.2E-1 | 1.0E0  |       |         |           |
| <input type="checkbox"/> | GOTERM_BP_FAT   | <a href="#">hydrogen transport</a>                                                                             | RT |  | 10                     | 5.3E-1 | 1.0E0  |       |         |           |
| <input type="checkbox"/> | GOTERM_BP_FAT   | <a href="#">proton transport</a>                                                                               | RT |  | 10                     | 5.3E-1 | 1.0E0  |       |         |           |
| <input type="checkbox"/> | KEGG_PATHWAY    | <a href="#">Oxidative phosphorylation</a>                                                                      | RT |  | 9                      | 5.3E-1 | 1.0E0  |       |         |           |
| <input type="checkbox"/> | INTERPRO        | <a href="#">ATPase, P-type phosphorylation site</a>                                                            | RT |  | 6                      | 5.6E-1 | 1.0E0  |       |         |           |
| <input type="checkbox"/> | GOTERM_BP_FAT   | <a href="#">generation of precursor metabolites and energy</a>                                                 | RT |  | 16                     | 5.8E-1 | 1.0E0  |       |         |           |
| <input type="checkbox"/> | GOTERM_CC_FAT   | <a href="#">proton-transporting two-sector ATPase complex</a>                                                  | RT |  | 10                     | 5.8E-1 | 1.0E0  |       |         |           |
| <input type="checkbox"/> | GOTERM_BP_FAT   | <a href="#">nitrogen compound biosynthetic process</a>                                                         | RT |  | 29                     | 5.8E-1 | 1.0E0  |       |         |           |
| <input type="checkbox"/> | GOTERM_BP_FAT   | <a href="#">nucleobase, nucleoside, nucleotide and nucleic acid biosynthetic process</a>                       | RT |  | 25                     | 5.9E-1 | 1.0E0  |       |         |           |
| <input type="checkbox"/> | GOTERM_BP_FAT   | <a href="#">nucleobase, nucleoside and nucleotide biosynthetic process</a>                                     | RT |  | 25                     | 5.9E-1 | 1.0E0  |       |         |           |
| <input type="checkbox"/> | GOTERM_MF_FAT   | <a href="#">di-, tri-valent inorganic cation transmembrane transporter activity</a>                            | RT |  | 3                      | 6.1E-1 | 1.0E0  |       |         |           |
| <input type="checkbox"/> | GOTERM_MF_FAT   | <a href="#">hydrolase activity, acting on acid anhydrides, catalyzing transmembrane movement of substances</a> | RT |  | 18                     | 6.2E-1 | 1.0E0  |       |         |           |
| <input type="checkbox"/> | GOTERM_BP_FAT   | <a href="#">ion transmembrane transport</a>                                                                    | RT |  | 9                      | 6.2E-1 | 1.0E0  |       |         |           |
| <input type="checkbox"/> | INTERPRO        | <a href="#">ATPase, P-type cation-transporter, C-terminal</a>                                                  | RT |  | 3                      | 6.3E-1 | 1.0E0  |       |         |           |
| <input type="checkbox"/> | INTERPRO        | <a href="#">ATPase, P-type cation-transporter, N-terminal</a>                                                  | RT |  | 3                      | 6.3E-1 | 1.0E0  |       |         |           |
| <input type="checkbox"/> | GOTERM_MF_FAT   | <a href="#">metal ion transmembrane transporter activity</a>                                                   | RT |  | 4                      | 6.4E-1 | 1.0E0  |       |         |           |
| <input type="checkbox"/> | GOTERM_BP_FAT   | <a href="#">monovalent inorganic cation transport</a>                                                          | RT |  | 10                     | 6.4E-1 | 1.0E0  |       |         |           |
| <input type="checkbox"/> | GOTERM_CC_FAT   | <a href="#">proton-transporting V-type ATPase, VO domain</a>                                                   | RT |  | 4                      | 6.7E-1 | 1.0E0  |       |         |           |
| <input type="checkbox"/> | GOTERM_MF_FAT   | <a href="#">ATPase activity, coupled to transmembrane movement of ions</a>                                     | RT |  | 12                     | 6.9E-1 | 1.0E0  |       |         |           |
| <input type="checkbox"/> | GOTERM_BP_FAT   | <a href="#">oxidative phosphorylation</a>                                                                      | RT |  | 8                      | 7.1E-1 | 1.0E0  |       |         |           |
| <input type="checkbox"/> | GOTERM_BP_FAT   | <a href="#">ATP synthesis coupled proton transport</a>                                                         | RT |  | 8                      | 7.1E-1 | 1.0E0  |       |         |           |
| <input type="checkbox"/> | GOTERM_BP_FAT   | <a href="#">energy coupled proton transport, down electrochemical gradient</a>                                 | RT |  | 8                      | 7.1E-1 | 1.0E0  |       |         |           |
| <input type="checkbox"/> | GOTERM_MF_FAT   | <a href="#">hydrogen ion transmembrane transporter activity</a>                                                | RT |  | 9                      | 7.3E-1 | 1.0E0  |       |         |           |
| <input type="checkbox"/> | GOTERM_MF_FAT   | <a href="#">monovalent inorganic cation transmembrane transporter activity</a>                                 | RT |  | 9                      | 7.3E-1 | 1.0E0  |       |         |           |
| <input type="checkbox"/> | GOTERM_MF_FAT   | <a href="#">ATPase activity, coupled to transmembrane movement of substances</a>                               | RT |  | 16                     | 7.4E-1 | 1.0E0  |       |         |           |
| <input type="checkbox"/> | GOTERM_MF_FAT   | <a href="#">ATPase activity, coupled to movement of substances</a>                                             | RT |  | 16                     | 7.4E-1 | 1.0E0  |       |         |           |
| <input type="checkbox"/> | GOTERM_MF_FAT   | <a href="#">primary active transmembrane transporter activity</a>                                              | RT |  | 17                     | 7.5E-1 | 1.0E0  |       |         |           |
| <input type="checkbox"/> | GOTERM_MF_FAT   | <a href="#">P-P-bond-hydrolysis-driven transmembrane transporter activity</a>                                  | RT |  | 17                     | 7.5E-1 | 1.0E0  |       |         |           |
| <input type="checkbox"/> | GOTERM_BP_FAT   | <a href="#">transmembrane transport</a>                                                                        | RT |  | 12                     | 7.6E-1 | 1.0E0  |       |         |           |
| <input type="checkbox"/> | SP_PIR_KEYWORDS | <a href="#">phosphoprotein</a>                                                                                 | RT |  | 3                      | 7.9E-1 | 9.9E-1 |       |         |           |
| <input type="checkbox"/> | SP_PIR_KEYWORDS | <a href="#">ion transport</a>                                                                                  | RT |  | 3                      | 8.9E-1 | 9.9E-1 |       |         |           |
| <input type="checkbox"/> | GOTERM_CC_FAT   | <a href="#">proton-transporting two-sector ATPase complex, catalytic domain</a>                                | RT |  | 4                      | 9.5E-1 | 1.0E0  |       |         |           |
| <input type="checkbox"/> | GOTERM_MF_FAT   | <a href="#">proton-transporting ATPase activity, rotational mechanism</a>                                      | RT |  | 3                      | 9.7E-1 | 1.0E0  |       |         |           |
| Annotation Cluster 18    |                 |                                                                                                                |    |  | Enrichment Score: 0.27 |        |        | Count | P_Value | Benjamini |
| <input type="checkbox"/> | GOTERM_BP_FAT   | <a href="#">cellular response to stress</a>                                                                    | RT |  | 14                     | 4.3E-1 | 1.0E0  |       |         |           |
| <input type="checkbox"/> | GOTERM_BP_FAT   | <a href="#">DNA repair</a>                                                                                     | RT |  | 13                     | 5.1E-1 | 1.0E0  |       |         |           |
| <input type="checkbox"/> | GOTERM_BP_FAT   | <a href="#">response to DNA damage stimulus</a>                                                                | RT |  | 13                     | 5.1E-1 | 1.0E0  |       |         |           |
| <input type="checkbox"/> | GOTERM_BP_FAT   | <a href="#">DNA metabolic process</a>                                                                          | RT |  | 33                     | 7.5E-1 | 1.0E0  |       |         |           |
| Annotation Cluster 19    |                 |                                                                                                                |    |  | Enrichment Score: 0.27 |        |        | Count | P_Value | Benjamini |
| <input type="checkbox"/> | GOTERM_CC_FAT   | <a href="#">endomembrane system</a>                                                                            | RT |  | 12                     | 3.0E-1 | 1.0E0  |       |         |           |
| <input type="checkbox"/> | GOTERM_BP_FAT   | <a href="#">nuclear transport</a>                                                                              | RT |  | 4                      | 4.3E-1 | 1.0E0  |       |         |           |

|                          |                       |                                                                      |    |  |  |  |       |         |           |
|--------------------------|-----------------------|----------------------------------------------------------------------|----|--|--|--|-------|---------|-----------|
| <input type="checkbox"/> |                       |                                                                      |    |  |  |  |       |         |           |
| <input type="checkbox"/> | GOTERM_BP_FAT         | <a href="#">nucleocytoplasmic transport</a>                          | RT |  |  |  | 4     | 4.3E-1  | 1.0E0     |
| <input type="checkbox"/> | GOTERM_CC_FAT         | <a href="#">organelle envelope</a>                                   | RT |  |  |  | 4     | 6.7E-1  | 1.0E0     |
| <input type="checkbox"/> | GOTERM_CC_FAT         | <a href="#">envelope</a>                                             | RT |  |  |  | 4     | 6.7E-1  | 1.0E0     |
| <input type="checkbox"/> | GOTERM_CC_FAT         | <a href="#">pore complex</a>                                         | RT |  |  |  | 4     | 6.7E-1  | 1.0E0     |
| <input type="checkbox"/> | GOTERM_CC_FAT         | <a href="#">nuclear envelope</a>                                     | RT |  |  |  | 4     | 6.7E-1  | 1.0E0     |
| <input type="checkbox"/> | GOTERM_CC_FAT         | <a href="#">nuclear pore</a>                                         | RT |  |  |  | 4     | 6.7E-1  | 1.0E0     |
|                          | Annotation Cluster 20 | Enrichment Score: 0.26                                               |    |  |  |  | Count | P_Value | Benjamini |
| <input type="checkbox"/> | SMART                 | <a href="#">t-SNARE</a>                                              | RT |  |  |  | 4     | 4.5E-1  | 1.0E0     |
| <input type="checkbox"/> | INTERPRO              | <a href="#">Target SNARE coiled-coil region</a>                      | RT |  |  |  | 4     | 4.5E-1  | 1.0E0     |
| <input type="checkbox"/> | KEGG_PATHWAY          | <a href="#">SNARE interactions in vesicular transport</a>            | RT |  |  |  | 3     | 8.1E-1  | 1.0E0     |
|                          | Annotation Cluster 21 | Enrichment Score: 0.26                                               |    |  |  |  | Count | P_Value | Benjamini |
| <input type="checkbox"/> | GOTERM_MF_FAT         | <a href="#">ion binding</a>                                          | RT |  |  |  | 155   | 2.4E-1  | 1.0E0     |
| <input type="checkbox"/> | GOTERM_MF_FAT         | <a href="#">cation binding</a>                                       | RT |  |  |  | 155   | 2.4E-1  | 1.0E0     |
| <input type="checkbox"/> | GOTERM_MF_FAT         | <a href="#">metal ion binding</a>                                    | RT |  |  |  | 152   | 2.9E-1  | 1.0E0     |
| <input type="checkbox"/> | GOTERM_MF_FAT         | <a href="#">zinc ion binding</a>                                     | RT |  |  |  | 90    | 4.1E-1  | 1.0E0     |
| <input type="checkbox"/> | GOTERM_MF_FAT         | <a href="#">transition metal ion binding</a>                         | RT |  |  |  | 107   | 6.5E-1  | 1.0E0     |
| <input type="checkbox"/> | SP_PIR_KEYWORDS       | <a href="#">metal-binding</a>                                        | RT |  |  |  | 57    | 6.7E-1  | 9.9E-1    |
| <input type="checkbox"/> | SP_PIR_KEYWORDS       | <a href="#">zinc</a>                                                 | RT |  |  |  | 46    | 8.1E-1  | 9.9E-1    |
| <input type="checkbox"/> | SP_PIR_KEYWORDS       | <a href="#">zinc-finger</a>                                          | RT |  |  |  | 33    | 8.3E-1  | 9.9E-1    |
| <input type="checkbox"/> | SMART                 | <a href="#">RING</a>                                                 | RT |  |  |  | 36    | 8.8E-1  | 1.0E0     |
| <input type="checkbox"/> | INTERPRO              | <a href="#">Zinc finger, RING-type</a>                               | RT |  |  |  | 36    | 8.8E-1  | 1.0E0     |
| <input type="checkbox"/> | INTERPRO              | <a href="#">Zinc finger, C3HC4 RING-type</a>                         | RT |  |  |  | 18    | 9.1E-1  | 1.0E0     |
|                          | Annotation Cluster 22 | Enrichment Score: 0.26                                               |    |  |  |  | Count | P_Value | Benjamini |
| <input type="checkbox"/> | GOTERM_BP_FAT         | <a href="#">rRNA processing</a>                                      | RT |  |  |  | 9     | 5.0E-1  | 1.0E0     |
| <input type="checkbox"/> | GOTERM_BP_FAT         | <a href="#">rRNA metabolic process</a>                               | RT |  |  |  | 9     | 5.0E-1  | 1.0E0     |
| <input type="checkbox"/> | GOTERM_BP_FAT         | <a href="#">ribonucleoprotein complex biogenesis</a>                 | RT |  |  |  | 13    | 5.1E-1  | 1.0E0     |
| <input type="checkbox"/> | GOTERM_BP_FAT         | <a href="#">ribosome biogenesis</a>                                  | RT |  |  |  | 13    | 5.1E-1  | 1.0E0     |
| <input type="checkbox"/> | GOTERM_BP_FAT         | <a href="#">ncRNA processing</a>                                     | RT |  |  |  | 18    | 5.3E-1  | 1.0E0     |
| <input type="checkbox"/> | GOTERM_BP_FAT         | <a href="#">rRNA modification</a>                                    | RT |  |  |  | 3     | 6.1E-1  | 1.0E0     |
| <input type="checkbox"/> | GOTERM_BP_FAT         | <a href="#">RNA processing</a>                                       | RT |  |  |  | 26    | 7.3E-1  | 1.0E0     |
|                          | Annotation Cluster 23 | Enrichment Score: 0.26                                               |    |  |  |  | Count | P_Value | Benjamini |
| <input type="checkbox"/> | GOTERM_MF_FAT         | <a href="#">protein phosphatase regulator activity</a>               | RT |  |  |  | 4     | 4.4E-1  | 1.0E0     |
| <input type="checkbox"/> | GOTERM_MF_FAT         | <a href="#">phosphatase regulator activity</a>                       | RT |  |  |  | 4     | 4.4E-1  | 1.0E0     |
| <input type="checkbox"/> | GOTERM_MF_FAT         | <a href="#">protein phosphatase type 2A regulator activity</a>       | RT |  |  |  | 3     | 6.1E-1  | 1.0E0     |
| <input type="checkbox"/> | GOTERM_CC_FAT         | <a href="#">protein phosphatase type 2A complex</a>                  | RT |  |  |  | 3     | 6.3E-1  | 1.0E0     |
| <input type="checkbox"/> | GOTERM_CC_FAT         | <a href="#">protein serine/threonine phosphatase complex</a>         | RT |  |  |  | 5     | 6.9E-1  | 1.0E0     |
|                          | Annotation Cluster 24 | Enrichment Score: 0.26                                               |    |  |  |  | Count | P_Value | Benjamini |
| <input type="checkbox"/> | SMART                 | <a href="#">HATPase_c</a>                                            | RT |  |  |  | 6     | 3.8E-1  | 1.0E0     |
| <input type="checkbox"/> | INTERPRO              | <a href="#">ATP-binding region, ATPase-like</a>                      | RT |  |  |  | 6     | 3.9E-1  | 1.0E0     |
| <input type="checkbox"/> | INTERPRO              | <a href="#">DNA mismatch repair protein</a>                          | RT |  |  |  | 3     | 6.3E-1  | 1.0E0     |
| <input type="checkbox"/> | GOTERM_BP_FAT         | <a href="#">mismatch repair</a>                                      | RT |  |  |  | 4     | 6.4E-1  | 1.0E0     |
| <input type="checkbox"/> | GOTERM_MF_FAT         | <a href="#">double-stranded DNA binding</a>                          | RT |  |  |  | 4     | 6.4E-1  | 1.0E0     |
| <input type="checkbox"/> | GOTERM_MF_FAT         | <a href="#">structure-specific DNA binding</a>                       | RT |  |  |  | 4     | 6.4E-1  | 1.0E0     |
| <input type="checkbox"/> | GOTERM_MF_FAT         | <a href="#">mismatched DNA binding</a>                               | RT |  |  |  | 4     | 6.4E-1  | 1.0E0     |
|                          | Annotation Cluster 25 | Enrichment Score: 0.25                                               |    |  |  |  | Count | P_Value | Benjamini |
| <input type="checkbox"/> | GOTERM_MF_FAT         | <a href="#">transcription regulator activity</a>                     | RT |  |  |  | 8     | 4.7E-1  | 1.0E0     |
| <input type="checkbox"/> | SMART                 | <a href="#">ZnF_C2C2</a>                                             | RT |  |  |  | 3     | 6.2E-1  | 1.0E0     |
| <input type="checkbox"/> | INTERPRO              | <a href="#">Zinc finger, TFIIIS-type</a>                             | RT |  |  |  | 3     | 6.3E-1  | 1.0E0     |
|                          | Annotation Cluster 26 | Enrichment Score: 0.24                                               |    |  |  |  | Count | P_Value | Benjamini |
| <input type="checkbox"/> | GOTERM_MF_FAT         | <a href="#">heat shock protein binding</a>                           | RT |  |  |  | 6     | 5.4E-1  | 1.0E0     |
| <input type="checkbox"/> | SMART                 | <a href="#">DnaJ</a>                                                 | RT |  |  |  | 6     | 5.5E-1  | 1.0E0     |
| <input type="checkbox"/> | INTERPRO              | <a href="#">Heat shock protein DnaJ, N-terminal</a>                  | RT |  |  |  | 6     | 5.6E-1  | 1.0E0     |
| <input type="checkbox"/> | INTERPRO              | <a href="#">Molecular chaperone, heat shock protein, Hsp40, DnaJ</a> | RT |  |  |  | 5     | 6.8E-1  | 1.0E0     |
|                          | Annotation Cluster 27 | Enrichment Score: 0.23                                               |    |  |  |  | Count | P_Value | Benjamini |
| <input type="checkbox"/> | GOTERM_MF_FAT         | <a href="#">structural constituent of ribosome</a>                   | RT |  |  |  | 42    | 4.3E-1  | 1.0E0     |
| <input type="checkbox"/> | KEGG_PATHWAY          | <a href="#">Ribosome</a>                                             | RT |  |  |  | 42    | 4.3E-1  | 1.0E0     |
| <input type="checkbox"/> | SP_PIR_KEYWORDS       | <a href="#">ribosomal protein</a>                                    | RT |  |  |  | 43    | 5.0E-1  | 1.0E0     |

| <input type="checkbox"/> | GOTERM_BP_FAT         | <a href="#">translation</a>                                                                           | RT |  |  |  |  | 66    | 5.0E-1  | 1.0E0     |  |
|--------------------------|-----------------------|-------------------------------------------------------------------------------------------------------|----|--|--|--|--|-------|---------|-----------|--|
| <input type="checkbox"/> | GOTERM_MF_FAT         | <a href="#">structural molecule activity</a>                                                          | RT |  |  |  |  | 49    | 5.4E-1  | 1.0E0     |  |
| <input type="checkbox"/> | GOTERM_CC_FAT         | <a href="#">ribonucleoprotein complex</a>                                                             | RT |  |  |  |  | 59    | 5.9E-1  | 1.0E0     |  |
| <input type="checkbox"/> | GOTERM_CC_FAT         | <a href="#">ribosome</a>                                                                              | RT |  |  |  |  | 44    | 6.8E-1  | 1.0E0     |  |
| <input type="checkbox"/> | GOTERM_CC_FAT         | <a href="#">intracellular non-membrane-bounded organelle</a>                                          | RT |  |  |  |  | 87    | 9.6E-1  | 1.0E0     |  |
| <input type="checkbox"/> | GOTERM_CC_FAT         | <a href="#">non-membrane-bounded organelle</a>                                                        | RT |  |  |  |  | 87    | 9.6E-1  | 1.0E0     |  |
|                          | Annotation Cluster 28 | Enrichment Score: 0.21                                                                                |    |  |  |  |  | Count | P_Value | Benjamini |  |
| <input type="checkbox"/> | SP_PIR_KEYWORDS       | <a href="#">ligase</a>                                                                                | RT |  |  |  |  | 34    | 4.1E-1  | 1.0E0     |  |
| <input type="checkbox"/> | GOTERM_MF_FAT         | <a href="#">small conjugating protein ligase activity</a>                                             | RT |  |  |  |  | 9     | 5.1E-1  | 1.0E0     |  |
| <input type="checkbox"/> | SMART                 | <a href="#">UBCc</a>                                                                                  | RT |  |  |  |  | 8     | 6.2E-1  | 1.0E0     |  |
| <input type="checkbox"/> | INTERPRO              | <a href="#">Ubiquitin-conjugating enzyme/RWD-like</a>                                                 | RT |  |  |  |  | 8     | 6.2E-1  | 1.0E0     |  |
| <input type="checkbox"/> | INTERPRO              | <a href="#">Ubiquitin-conjugating enzyme_F2</a>                                                       | RT |  |  |  |  | 8     | 6.2E-1  | 1.0E0     |  |
| <input type="checkbox"/> | GOTERM_MF_FAT         | <a href="#">ubiquitin-protein ligase activity</a>                                                     | RT |  |  |  |  | 4     | 6.4E-1  | 1.0E0     |  |
| <input type="checkbox"/> | GOTERM_MF_FAT         | <a href="#">acid-amino acid ligase activity</a>                                                       | RT |  |  |  |  | 16    | 6.7E-1  | 1.0E0     |  |
| <input type="checkbox"/> | SP_PIR_KEYWORDS       | <a href="#">ubl conjugation pathway</a>                                                               | RT |  |  |  |  | 8     | 7.1E-1  | 9.9E-1    |  |
| <input type="checkbox"/> | GOTERM_MF_FAT         | <a href="#">ligase activity, forming carbon-nitrogen bonds</a>                                        | RT |  |  |  |  | 18    | 7.6E-1  | 1.0E0     |  |
|                          | Annotation Cluster 29 | Enrichment Score: 0.2                                                                                 |    |  |  |  |  | Count | P_Value | Benjamini |  |
| <input type="checkbox"/> | GOTERM_MF_FAT         | <a href="#">exopeptidase activity</a>                                                                 | RT |  |  |  |  | 8     | 4.7E-1  | 1.0E0     |  |
| <input type="checkbox"/> | GOTERM_MF_FAT         | <a href="#">metallopeptidase activity</a>                                                             | RT |  |  |  |  | 9     | 5.1E-1  | 1.0E0     |  |
| <input type="checkbox"/> | SP_PIR_KEYWORDS       | <a href="#">dipeptidase</a>                                                                           | RT |  |  |  |  | 3     | 6.1E-1  | 9.9E-1    |  |
| <input type="checkbox"/> | GOTERM_MF_FAT         | <a href="#">dipeptidase activity</a>                                                                  | RT |  |  |  |  | 3     | 6.1E-1  | 1.0E0     |  |
| <input type="checkbox"/> | SMART                 | <a href="#">Zn_pept</a>                                                                               | RT |  |  |  |  | 4     | 6.5E-1  | 1.0E0     |  |
| <input type="checkbox"/> | INTERPRO              | <a href="#">Peptidase M14_carboxypeptidase A</a>                                                      | RT |  |  |  |  | 4     | 6.6E-1  | 1.0E0     |  |
| <input type="checkbox"/> | GOTERM_MF_FAT         | <a href="#">metalloexopeptidase activity</a>                                                          | RT |  |  |  |  | 5     | 6.6E-1  | 1.0E0     |  |
| <input type="checkbox"/> | GOTERM_MF_FAT         | <a href="#">carboxypeptidase activity</a>                                                             | RT |  |  |  |  | 3     | 7.9E-1  | 1.0E0     |  |
| <input type="checkbox"/> | GOTERM_MF_FAT         | <a href="#">metallocarboxypeptidase activity</a>                                                      | RT |  |  |  |  | 3     | 7.9E-1  | 1.0E0     |  |
|                          | Annotation Cluster 30 | Enrichment Score: 0.2                                                                                 |    |  |  |  |  | Count | P_Value | Benjamini |  |
| <input type="checkbox"/> | INTERPRO              | <a href="#">WD40/YVTN repeat-like</a>                                                                 | RT |  |  |  |  | 45    | 3.7E-1  | 1.0E0     |  |
| <input type="checkbox"/> | SMART                 | <a href="#">WD40</a>                                                                                  | RT |  |  |  |  | 45    | 4.7E-1  | 1.0E0     |  |
| <input type="checkbox"/> | INTERPRO              | <a href="#">WD40 repeat</a>                                                                           | RT |  |  |  |  | 45    | 4.8E-1  | 1.0E0     |  |
| <input type="checkbox"/> | INTERPRO              | <a href="#">WD40 repeat, conserved site</a>                                                           | RT |  |  |  |  | 17    | 7.1E-1  | 1.0E0     |  |
| <input type="checkbox"/> | INTERPRO              | <a href="#">WD40 repeat, subgroup</a>                                                                 | RT |  |  |  |  | 32    | 7.3E-1  | 1.0E0     |  |
| <input type="checkbox"/> | SP_PIR_KEYWORDS       | <a href="#">wd repeat</a>                                                                             | RT |  |  |  |  | 27    | 7.9E-1  | 9.9E-1    |  |
| <input type="checkbox"/> | INTERPRO              | <a href="#">WD40 repeat 2</a>                                                                         | RT |  |  |  |  | 23    | 8.7E-1  | 1.0E0     |  |
| <input type="checkbox"/> | INTERPRO              | <a href="#">WD40 repeat, region</a>                                                                   | RT |  |  |  |  | 25    | 8.8E-1  | 1.0E0     |  |
|                          | Annotation Cluster 31 | Enrichment Score: 0.2                                                                                 |    |  |  |  |  | Count | P_Value | Benjamini |  |
| <input type="checkbox"/> | SMART                 | <a href="#">FU</a>                                                                                    | RT |  |  |  |  | 110   | 4.3E-1  | 1.0E0     |  |
| <input type="checkbox"/> | INTERPRO              | <a href="#">Furin-like repeat</a>                                                                     | RT |  |  |  |  | 110   | 4.4E-1  | 1.0E0     |  |
| <input type="checkbox"/> | INTERPRO              | <a href="#">Giardia variant-specific surface protein</a>                                              | RT |  |  |  |  | 135   | 7.3E-1  | 1.0E0     |  |
| <input type="checkbox"/> | INTERPRO              | <a href="#">EGF-like</a>                                                                              | RT |  |  |  |  | 105   | 8.7E-1  | 1.0E0     |  |
| <input type="checkbox"/> | SMART                 | <a href="#">EGF</a>                                                                                   | RT |  |  |  |  | 105   | 8.8E-1  | 1.0E0     |  |
|                          | Annotation Cluster 32 | Enrichment Score: 0.19                                                                                |    |  |  |  |  | Count | P_Value | Benjamini |  |
| <input type="checkbox"/> | GOTERM_BP_FAT         | <a href="#">protein amino acid lipidation</a>                                                         | RT |  |  |  |  | 4     | 6.4E-1  | 1.0E0     |  |
| <input type="checkbox"/> | GOTERM_BP_FAT         | <a href="#">lipoprotein metabolic process</a>                                                         | RT |  |  |  |  | 4     | 6.4E-1  | 1.0E0     |  |
| <input type="checkbox"/> | GOTERM_BP_FAT         | <a href="#">lipoprotein biosynthetic process</a>                                                      | RT |  |  |  |  | 4     | 6.4E-1  | 1.0E0     |  |
|                          | Annotation Cluster 33 | Enrichment Score: 0.18                                                                                |    |  |  |  |  | Count | P_Value | Benjamini |  |
| <input type="checkbox"/> | GOTERM_MF_FAT         | <a href="#">ATPase activity, coupled to transmembrane movement of ions, phosphorylative mechanism</a> | RT |  |  |  |  | 9     | 3.7E-1  | 1.0E0     |  |
| <input type="checkbox"/> | INTERPRO              | <a href="#">ATPase, P-type, K/Mg/Cd/Cu/Zn/Na/Ca/Na/H-transporter</a>                                  | RT |  |  |  |  | 9     | 3.9E-1  | 1.0E0     |  |
| <input type="checkbox"/> | INTERPRO              | <a href="#">ATPase, P-type, ATPase-associated region</a>                                              | RT |  |  |  |  | 8     | 4.9E-1  | 1.0E0     |  |
| <input type="checkbox"/> | INTERPRO              | <a href="#">ATPase, P-type phosphorylation site</a>                                                   | RT |  |  |  |  | 6     | 5.6E-1  | 1.0E0     |  |
| <input type="checkbox"/> | SP_PIR_KEYWORDS       | <a href="#">magnesium</a>                                                                             | RT |  |  |  |  | 8     | 6.0E-1  | 9.9E-1    |  |
| <input type="checkbox"/> | GOTERM_BP_FAT         | <a href="#">lipid transport</a>                                                                       | RT |  |  |  |  | 4     | 6.4E-1  | 1.0E0     |  |
| <input type="checkbox"/> | GOTERM_BP_FAT         | <a href="#">lipid localization</a>                                                                    | RT |  |  |  |  | 4     | 6.4E-1  | 1.0E0     |  |
| <input type="checkbox"/> | GOTERM_MF_FAT         | <a href="#">magnesium ion binding</a>                                                                 | RT |  |  |  |  | 9     | 7.3E-1  | 1.0E0     |  |
| <input type="checkbox"/> | GOTERM_MF_FAT         | <a href="#">lipid transporter activity</a>                                                            | RT |  |  |  |  | 4     | 7.9E-1  | 1.0E0     |  |
| <input type="checkbox"/> | GOTERM_BP_FAT         | <a href="#">phospholipid transport</a>                                                                | RT |  |  |  |  | 3     | 7.9E-1  | 1.0E0     |  |
| <input type="checkbox"/> | INTERPRO              | <a href="#">ATPase, P-type, phospholipid-translocating</a>                                            | RT |  |  |  |  | 3     | 8.0E-1  | 1.0E0     |  |

| <input type="checkbox"/> | GOTERM_MF_FAT         | <a href="#">flippase</a>                                                |    |  |  |  |  |       |         |           |
|--------------------------|-----------------------|-------------------------------------------------------------------------|----|--|--|--|--|-------|---------|-----------|
| <input type="checkbox"/> | GOTERM_MF_FAT         | <a href="#">aminophospholipid transporter activity</a>                  | RT |  |  |  |  | 3     | 8.9E-1  | 1.0E0     |
| <input type="checkbox"/> | GOTERM_MF_FAT         | <a href="#">phospholipid-translocating ATPase activity</a>              | RT |  |  |  |  | 3     | 8.9E-1  | 1.0E0     |
| <input type="checkbox"/> | GOTERM_MF_FAT         | <a href="#">phospholipid transporter activity</a>                       | RT |  |  |  |  | 3     | 8.9E-1  | 1.0E0     |
|                          | Annotation Cluster 34 | Enrichment Score: 0.18                                                  |    |  |  |  |  | Count | P_Value | Benjamini |
| <input type="checkbox"/> | GOTERM_MF_FAT         | <a href="#">GTPase regulator activity</a>                               | RT |  |  |  |  | 8     | 4.7E-1  | 1.0E0     |
| <input type="checkbox"/> | GOTERM_MF_FAT         | <a href="#">small GTPase regulator activity</a>                         | RT |  |  |  |  | 8     | 4.7E-1  | 1.0E0     |
| <input type="checkbox"/> | GOTERM_MF_FAT         | <a href="#">nucleoside-triphosphatase regulator activity</a>            | RT |  |  |  |  | 9     | 5.1E-1  | 1.0E0     |
| <input type="checkbox"/> | GOTERM_BP_FAT         | <a href="#">regulation of ARF protein signal transduction</a>           | RT |  |  |  |  | 4     | 6.4E-1  | 1.0E0     |
| <input type="checkbox"/> | GOTERM_BP_FAT         | <a href="#">regulation of Ras protein signal transduction</a>           | RT |  |  |  |  | 6     | 6.8E-1  | 1.0E0     |
| <input type="checkbox"/> | GOTERM_BP_FAT         | <a href="#">regulation of small GTPase mediated signal transduction</a> | RT |  |  |  |  | 6     | 6.8E-1  | 1.0E0     |
| <input type="checkbox"/> | GOTERM_MF_FAT         | <a href="#">enzyme activator activity</a>                               | RT |  |  |  |  | 6     | 6.8E-1  | 1.0E0     |
| <input type="checkbox"/> | GOTERM_BP_FAT         | <a href="#">regulation of hydrolase activity</a>                        | RT |  |  |  |  | 5     | 7.9E-1  | 1.0E0     |
| <input type="checkbox"/> | GOTERM_BP_FAT         | <a href="#">regulation of GTPase activity</a>                           | RT |  |  |  |  | 5     | 7.9E-1  | 1.0E0     |
| <input type="checkbox"/> | GOTERM_BP_FAT         | <a href="#">regulation of Ras GTPase activity</a>                       | RT |  |  |  |  | 4     | 8.8E-1  | 1.0E0     |
| <input type="checkbox"/> | GOTERM_MF_FAT         | <a href="#">GTPase activator activity</a>                               | RT |  |  |  |  | 4     | 8.8E-1  | 1.0E0     |
|                          | Annotation Cluster 35 | Enrichment Score: 0.17                                                  |    |  |  |  |  | Count | P_Value | Benjamini |
| <input type="checkbox"/> | GOTERM_BP_FAT         | <a href="#">cyclic nucleotide metabolic process</a>                     | RT |  |  |  |  | 3     | 6.1E-1  | 1.0E0     |
| <input type="checkbox"/> | GOTERM_BP_FAT         | <a href="#">cyclic nucleotide biosynthetic process</a>                  | RT |  |  |  |  | 3     | 6.1E-1  | 1.0E0     |
| <input type="checkbox"/> | GOTERM_MF_FAT         | <a href="#">phosphorus-oxygen lyase activity</a>                        | RT |  |  |  |  | 3     | 6.1E-1  | 1.0E0     |
| <input type="checkbox"/> | GOTERM_BP_FAT         | <a href="#">nucleoside monophosphate biosynthetic process</a>           | RT |  |  |  |  | 3     | 7.9E-1  | 1.0E0     |
| <input type="checkbox"/> | GOTERM_BP_FAT         | <a href="#">nucleoside monophosphate metabolic process</a>              | RT |  |  |  |  | 3     | 7.9E-1  | 1.0E0     |
|                          | Annotation Cluster 36 | Enrichment Score: 0.16                                                  |    |  |  |  |  | Count | P_Value | Benjamini |
| <input type="checkbox"/> | SMART                 | <a href="#">ZnF_C2H2</a>                                                | RT |  |  |  |  | 11    | 6.9E-1  | 1.0E0     |
| <input type="checkbox"/> | INTERPRO              | <a href="#">Zinc finger_C2H2-type</a>                                   | RT |  |  |  |  | 11    | 6.9E-1  | 1.0E0     |
| <input type="checkbox"/> | INTERPRO              | <a href="#">Zinc finger_C2H2-like</a>                                   | RT |  |  |  |  | 11    | 6.9E-1  | 1.0E0     |
|                          | Annotation Cluster 37 | Enrichment Score: 0.14                                                  |    |  |  |  |  | Count | P_Value | Benjamini |
| <input type="checkbox"/> | GOTERM_BP_FAT         | <a href="#">hexose metabolic process</a>                                | RT |  |  |  |  | 13    | 5.1E-1  | 1.0E0     |
| <input type="checkbox"/> | GOTERM_BP_FAT         | <a href="#">glucose metabolic process</a>                               | RT |  |  |  |  | 13    | 5.1E-1  | 1.0E0     |
| <input type="checkbox"/> | GOTERM_BP_FAT         | <a href="#">generation of precursor metabolites and energy</a>          | RT |  |  |  |  | 16    | 5.8E-1  | 1.0E0     |
| <input type="checkbox"/> | GOTERM_BP_FAT         | <a href="#">monosaccharide metabolic process</a>                        | RT |  |  |  |  | 14    | 6.3E-1  | 1.0E0     |
| <input type="checkbox"/> | GOTERM_BP_FAT         | <a href="#">hexose catabolic process</a>                                | RT |  |  |  |  | 8     | 8.0E-1  | 1.0E0     |
| <input type="checkbox"/> | GOTERM_BP_FAT         | <a href="#">alcohol catabolic process</a>                               | RT |  |  |  |  | 8     | 8.0E-1  | 1.0E0     |
| <input type="checkbox"/> | GOTERM_BP_FAT         | <a href="#">glucose catabolic process</a>                               | RT |  |  |  |  | 8     | 8.0E-1  | 1.0E0     |
| <input type="checkbox"/> | GOTERM_BP_FAT         | <a href="#">monosaccharide catabolic process</a>                        | RT |  |  |  |  | 8     | 8.0E-1  | 1.0E0     |
| <input type="checkbox"/> | GOTERM_BP_FAT         | <a href="#">cellular carbohydrate catabolic process</a>                 | RT |  |  |  |  | 8     | 8.0E-1  | 1.0E0     |
| <input type="checkbox"/> | GOTERM_BP_FAT         | <a href="#">carbohydrate catabolic process</a>                          | RT |  |  |  |  | 8     | 8.0E-1  | 1.0E0     |
| <input type="checkbox"/> | GOTERM_BP_FAT         | <a href="#">glycolysis</a>                                              | RT |  |  |  |  | 6     | 8.7E-1  | 1.0E0     |
| <input type="checkbox"/> | SP_PIR_KEYWORDS       | <a href="#">glycolysis</a>                                              | RT |  |  |  |  | 3     | 9.5E-1  | 1.0E0     |
|                          | Annotation Cluster 38 | Enrichment Score: 0.14                                                  |    |  |  |  |  | Count | P_Value | Benjamini |
| <input type="checkbox"/> | GOTERM_BP_FAT         | <a href="#">organophosphate metabolic process</a>                       | RT |  |  |  |  | 9     | 5.0E-1  | 1.0E0     |
| <input type="checkbox"/> | GOTERM_BP_FAT         | <a href="#">phospholipid metabolic process</a>                          | RT |  |  |  |  | 8     | 6.0E-1  | 1.0E0     |
| <input type="checkbox"/> | GOTERM_BP_FAT         | <a href="#">lipid biosynthetic process</a>                              | RT |  |  |  |  | 9     | 6.2E-1  | 1.0E0     |
| <input type="checkbox"/> | GOTERM_BP_FAT         | <a href="#">phospholipid biosynthetic process</a>                       | RT |  |  |  |  | 5     | 6.6E-1  | 1.0E0     |
| <input type="checkbox"/> | GOTERM_BP_FAT         | <a href="#">glycerolipid metabolic process</a>                          | RT |  |  |  |  | 4     | 8.8E-1  | 1.0E0     |
| <input type="checkbox"/> | GOTERM_BP_FAT         | <a href="#">phosphoinositide metabolic process</a>                      | RT |  |  |  |  | 4     | 8.8E-1  | 1.0E0     |
| <input type="checkbox"/> | GOTERM_BP_FAT         | <a href="#">glycerophospholipid metabolic process</a>                   | RT |  |  |  |  | 4     | 8.8E-1  | 1.0E0     |
| <input type="checkbox"/> | GOTERM_MF_FAT         | <a href="#">inositol or phosphatidylinositol kinase activity</a>        | RT |  |  |  |  | 3     | 8.9E-1  | 1.0E0     |
|                          | Annotation Cluster 39 | Enrichment Score: 0.14                                                  |    |  |  |  |  | Count | P_Value | Benjamini |
| <input type="checkbox"/> | GOTERM_BP_FAT         | <a href="#">dephosphorylation</a>                                       | RT |  |  |  |  | 10    | 6.4E-1  | 1.0E0     |
| <input type="checkbox"/> | GOTERM_BP_FAT         | <a href="#">protein amino acid dephosphorylation</a>                    | RT |  |  |  |  | 8     | 7.1E-1  | 1.0E0     |
| <input type="checkbox"/> | GOTERM_MF_FAT         | <a href="#">phosphatase activity</a>                                    | RT |  |  |  |  | 25    | 7.2E-1  | 1.0E0     |
| <input type="checkbox"/> | GOTERM_MF_FAT         | <a href="#">phosphoprotein phosphatase activity</a>                     | RT |  |  |  |  | 15    | 8.5E-1  | 1.0E0     |
|                          | Annotation Cluster 40 | Enrichment Score: 0.14                                                  |    |  |  |  |  | Count | P_Value | Benjamini |
| <input type="checkbox"/> | GOTERM_BP_FAT         | <a href="#">cellular carbohydrate biosynthetic process</a>              | RT |  |  |  |  | 5     | 6.6E-1  | 1.0E0     |
| <input type="checkbox"/> | GOTERM_BP_FAT         | <a href="#">carbohydrate biosynthetic process</a>                       | RT |  |  |  |  | 5     | 6.6E-1  | 1.0E0     |
| <input type="checkbox"/> | GOTERM_BP_FAT         | <a href="#">alcohol biosynthetic process</a>                            | RT |  |  |  |  | 3     | 8.9E-1  | 1.0E0     |
|                          | Annotation Cluster 41 | Enrichment Score: 0.13                                                  |    |  |  |  |  | Count | P_Value | Benjamini |

| <input type="checkbox"/> | Category              | Term                                                                                                                         | RT | Bar | Count | P-Value | Benjamini |
|--------------------------|-----------------------|------------------------------------------------------------------------------------------------------------------------------|----|-----|-------|---------|-----------|
| <input type="checkbox"/> | INTERPRO              | <a href="#">ABC transporter-like</a>                                                                                         | RT |     | 14    | 6.6E-1  | 1.0E0     |
| <input type="checkbox"/> | INTERPRO              | <a href="#">ABC transporter, conserved site</a>                                                                              | RT |     | 13    | 7.2E-1  | 1.0E0     |
| <input type="checkbox"/> | COG_ONTOLOGY          | <a href="#">Defense mechanisms</a>                                                                                           | RT |     | 12    | 8.5E-1  | 1.0E0     |
|                          | Annotation Cluster 42 | Enrichment Score: 0.13                                                                                                       |    |     | Count | P-Value | Benjamini |
| <input type="checkbox"/> | SP_PIR_KEYWORDS       | <a href="#">viral nucleoprotein</a>                                                                                          | RT |     | 10    | 5.3E-1  | 1.0E0     |
| <input type="checkbox"/> | INTERPRO              | <a href="#">Like-Sm ribonucleoprotein, core</a>                                                                              | RT |     | 7     | 7.2E-1  | 1.0E0     |
| <input type="checkbox"/> | SMART                 | <a href="#">Sm</a>                                                                                                           | RT |     | 4     | 8.9E-1  | 1.0E0     |
| <input type="checkbox"/> | INTERPRO              | <a href="#">Like-Sm ribonucleoprotein, eukaryotic and archaea-type, core</a>                                                 | RT |     | 4     | 8.9E-1  | 1.0E0     |
|                          | Annotation Cluster 43 | Enrichment Score: 0.13                                                                                                       |    |     | Count | P-Value | Benjamini |
| <input type="checkbox"/> | INTERPRO              | <a href="#">Cyclin-related</a>                                                                                               | RT |     | 5     | 5.1E-1  | 1.0E0     |
| <input type="checkbox"/> | SMART                 | <a href="#">CYCLIN</a>                                                                                                       | RT |     | 3     | 9.0E-1  | 1.0E0     |
| <input type="checkbox"/> | INTERPRO              | <a href="#">Cyclin</a>                                                                                                       | RT |     | 3     | 9.0E-1  | 1.0E0     |
|                          | Annotation Cluster 44 | Enrichment Score: 0.13                                                                                                       |    |     | Count | P-Value | Benjamini |
| <input type="checkbox"/> | INTERPRO              | <a href="#">Pseudouridine synthase I, TruA</a>                                                                               | RT |     | 3     | 6.3E-1  | 1.0E0     |
| <input type="checkbox"/> | PIR_SUPERFAMILY       | PIRSF001430:tRNA_psdUrid_synth                                                                                               | RT |     | 3     | 6.3E-1  | 1.0E0     |
| <input type="checkbox"/> | GOTERM_MF_FAT         | <a href="#">intramolecular transferase activity</a>                                                                          | RT |     | 7     | 7.0E-1  | 1.0E0     |
| <input type="checkbox"/> | GOTERM_BP_FAT         | <a href="#">RNA modification</a>                                                                                             | RT |     | 9     | 8.1E-1  | 1.0E0     |
| <input type="checkbox"/> | GOTERM_BP_FAT         | <a href="#">pseudouridine synthesis</a>                                                                                      | RT |     | 4     | 8.8E-1  | 1.0E0     |
| <input type="checkbox"/> | GOTERM_MF_FAT         | <a href="#">pseudouridine synthase activity</a>                                                                              | RT |     | 4     | 8.8E-1  | 1.0E0     |
|                          | Annotation Cluster 45 | Enrichment Score: 0.13                                                                                                       |    |     | Count | P-Value | Benjamini |
| <input type="checkbox"/> | GOTERM_MF_FAT         | <a href="#">thiolester hydrolase activity</a>                                                                                | RT |     | 6     | 5.4E-1  | 1.0E0     |
| <input type="checkbox"/> | GOTERM_MF_FAT         | <a href="#">ubiquitin thiolesterase activity</a>                                                                             | RT |     | 4     | 7.9E-1  | 1.0E0     |
| <input type="checkbox"/> | INTERPRO              | <a href="#">Peptidase C19, ubiquitin carboxyl-terminal hydrolase 2</a>                                                       | RT |     | 4     | 8.0E-1  | 1.0E0     |
| <input type="checkbox"/> | GOTERM_BP_FAT         | <a href="#">ubiquitin-dependent protein catabolic process</a>                                                                | RT |     | 7     | 9.2E-1  | 1.0E0     |
|                          | Annotation Cluster 46 | Enrichment Score: 0.12                                                                                                       |    |     | Count | P-Value | Benjamini |
| <input type="checkbox"/> | INTERPRO              | <a href="#">Kelch-type beta propeller</a>                                                                                    | RT |     | 5     | 6.8E-1  | 1.0E0     |
| <input type="checkbox"/> | SMART                 | <a href="#">Kelch</a>                                                                                                        | RT |     | 4     | 8.0E-1  | 1.0E0     |
| <input type="checkbox"/> | INTERPRO              | <a href="#">Kelch repeat type 1</a>                                                                                          | RT |     | 4     | 8.0E-1  | 1.0E0     |
|                          | Annotation Cluster 47 | Enrichment Score: 0.12                                                                                                       |    |     | Count | P-Value | Benjamini |
| <input type="checkbox"/> | INTERPRO              | <a href="#">Cyclin-related</a>                                                                                               | RT |     | 5     | 5.1E-1  | 1.0E0     |
| <input type="checkbox"/> | SP_PIR_KEYWORDS       | <a href="#">cyclin</a>                                                                                                       | RT |     | 5     | 9.3E-1  | 1.0E0     |
| <input type="checkbox"/> | INTERPRO              | <a href="#">Cyclin, N-terminal</a>                                                                                           | RT |     | 3     | 9.5E-1  | 1.0E0     |
|                          | Annotation Cluster 48 | Enrichment Score: 0.12                                                                                                       |    |     | Count | P-Value | Benjamini |
| <input type="checkbox"/> | KEGG_PATHWAY          | <a href="#">Valine, leucine and isoleucine biosynthesis</a>                                                                  | RT |     | 5     | 3.1E-1  | 1.0E0     |
| <input type="checkbox"/> | INTERPRO              | <a href="#">Aminoacyl-tRNA synthetase, class I, conserved site</a>                                                           | RT |     | 7     | 4.4E-1  | 1.0E0     |
| <input type="checkbox"/> | GOTERM_BP_FAT         | <a href="#">ncRNA metabolic process</a>                                                                                      | RT |     | 30    | 6.6E-1  | 1.0E0     |
| <input type="checkbox"/> | GOTERM_BP_FAT         | <a href="#">tRNA aminoacylation for protein translation</a>                                                                  | RT |     | 12    | 8.3E-1  | 1.0E0     |
| <input type="checkbox"/> | GOTERM_MF_FAT         | <a href="#">ligase activity, forming carbon-oxvgen bonds</a>                                                                 | RT |     | 13    | 8.4E-1  | 1.0E0     |
| <input type="checkbox"/> | GOTERM_MF_FAT         | <a href="#">aminoacyl-tRNA ligase activity</a>                                                                               | RT |     | 13    | 8.4E-1  | 1.0E0     |
| <input type="checkbox"/> | GOTERM_MF_FAT         | <a href="#">ligase activity, forming aminoacyl-tRNA and related compounds</a>                                                | RT |     | 13    | 8.4E-1  | 1.0E0     |
| <input type="checkbox"/> | GOTERM_BP_FAT         | <a href="#">tRNA metabolic process</a>                                                                                       | RT |     | 21    | 8.7E-1  | 1.0E0     |
| <input type="checkbox"/> | SP_PIR_KEYWORDS       | <a href="#">Aminoacyl-tRNA synthetase</a>                                                                                    | RT |     | 12    | 8.8E-1  | 9.9E-1    |
| <input type="checkbox"/> | GOTERM_BP_FAT         | <a href="#">tRNA aminoacylation</a>                                                                                          | RT |     | 12    | 8.8E-1  | 1.0E0     |
| <input type="checkbox"/> | GOTERM_BP_FAT         | <a href="#">amino acid activation</a>                                                                                        | RT |     | 12    | 8.8E-1  | 1.0E0     |
| <input type="checkbox"/> | INTERPRO              | <a href="#">Rossmann-like alpha/beta/alpha sandwich fold</a>                                                                 | RT |     | 10    | 8.9E-1  | 1.0E0     |
| <input type="checkbox"/> | KEGG_PATHWAY          | <a href="#">Aminoacyl-tRNA biosynthesis</a>                                                                                  | RT |     | 11    | 9.0E-1  | 1.0E0     |
| <input type="checkbox"/> | SP_PIR_KEYWORDS       | <a href="#">protein biosynthesis</a>                                                                                         | RT |     | 5     | 9.3E-1  | 1.0E0     |
| <input type="checkbox"/> | INTERPRO              | <a href="#">Aminoacyl-tRNA synthetase, class II, conserved region</a>                                                        | RT |     | 4     | 9.7E-1  | 1.0E0     |
|                          | Annotation Cluster 49 | Enrichment Score: 0.11                                                                                                       |    |     | Count | P-Value | Benjamini |
| <input type="checkbox"/> | GOTERM_MF_FAT         | <a href="#">endoribonuclease activity</a>                                                                                    | RT |     | 4     | 6.4E-1  | 1.0E0     |
| <input type="checkbox"/> | GOTERM_MF_FAT         | <a href="#">ribonuclease activity</a>                                                                                        | RT |     | 6     | 7.9E-1  | 1.0E0     |
| <input type="checkbox"/> | GOTERM_MF_FAT         | <a href="#">endoribonuclease activity, producing 5'-phosphomonoesters</a>                                                    | RT |     | 3     | 7.9E-1  | 1.0E0     |
| <input type="checkbox"/> | GOTERM_MF_FAT         | <a href="#">endonuclease activity, active with either ribo- or deoxyribonucleic acids and producing 5'-phosphomonoesters</a> | RT |     | 4     | 8.8E-1  | 1.0E0     |
|                          | Annotation Cluster 50 | Enrichment Score: 0.11                                                                                                       |    |     | Count | P-Value | Benjamini |
| <input type="checkbox"/> | GOTERM_MF_FAT         | <a href="#">peptidase activity, acting on L-amino acid peptides</a>                                                          | RT |     | 40    | 5.8E-1  | 1.0E0     |
| <input type="checkbox"/> | GOTERM_MF_FAT         | <a href="#">peptidase activity</a>                                                                                           | RT |     | 46    | 6.0E-1  | 1.0E0     |

| <input type="checkbox"/> |                 |                                                                                                              |    |  | Count | P-Value | Benjamini               |
|--------------------------|-----------------|--------------------------------------------------------------------------------------------------------------|----|--|-------|---------|-------------------------|
| <input type="checkbox"/> | GOTERM_BP_FAT   | <a href="#">proteolysis</a>                                                                                  | RT |  | 51    | 6.0E-1  | 1.0E0                   |
| <input type="checkbox"/> | GOTERM_MF_FAT   | <a href="#">endopeptidase activity</a>                                                                       | RT |  | 26    | 7.3E-1  | 1.0E0                   |
| <input type="checkbox"/> | GOTERM_MF_FAT   | <a href="#">cysteine-type peptidase activity</a>                                                             | RT |  | 17    | 7.5E-1  | 1.0E0                   |
| <input type="checkbox"/> | SMART           | <a href="#">Pept_C1</a>                                                                                      | RT |  | 14    | 9.0E-1  | 1.0E0                   |
| <input type="checkbox"/> | INTERPRO        | <a href="#">Peptidase C1A, papain</a>                                                                        | RT |  | 14    | 9.0E-1  | 1.0E0                   |
| <input type="checkbox"/> | INTERPRO        | <a href="#">Peptidase C1A, papain C-terminal</a>                                                             | RT |  | 14    | 9.0E-1  | 1.0E0                   |
| <input type="checkbox"/> | GOTERM_MF_FAT   | <a href="#">cysteine-type endopeptidase activity</a>                                                         | RT |  | 12    | 9.2E-1  | 1.0E0                   |
| <input type="checkbox"/> | SP_PIR_KEYWORDS | <a href="#">Protease</a>                                                                                     | RT |  | 18    | 9.2E-1  | 1.0E0                   |
| <input type="checkbox"/> | INTERPRO        | <a href="#">Peptidase, cysteine peptidase active site</a>                                                    | RT |  | 14    | 9.7E-1  | 1.0E0                   |
| Annotation Cluster 51    |                 | Enrichment Score: 0.11                                                                                       |    |  |       |         | Count P-Value Benjamini |
| <input type="checkbox"/> | SP_PIR_KEYWORDS | <a href="#">nucleotide-binding</a>                                                                           | RT |  | 158   | 4.1E-1  | 9.9E-1                  |
| <input type="checkbox"/> | SP_PIR_KEYWORDS | <a href="#">atp-binding</a>                                                                                  | RT |  | 148   | 5.5E-1  | 9.9E-1                  |
| <input type="checkbox"/> | GOTERM_BP_FAT   | <a href="#">phosphorus metabolic process</a>                                                                 | RT |  | 171   | 7.2E-1  | 1.0E0                   |
| <input type="checkbox"/> | GOTERM_BP_FAT   | <a href="#">phosphate metabolic process</a>                                                                  | RT |  | 171   | 7.2E-1  | 1.0E0                   |
| <input type="checkbox"/> | GOTERM_MF_FAT   | <a href="#">nucleotide binding</a>                                                                           | RT |  | 349   | 7.5E-1  | 1.0E0                   |
| <input type="checkbox"/> | GOTERM_BP_FAT   | <a href="#">phosphorylation</a>                                                                              | RT |  | 161   | 7.6E-1  | 1.0E0                   |
| <input type="checkbox"/> | SP_PIR_KEYWORDS | <a href="#">kinase</a>                                                                                       | RT |  | 184   | 7.8E-1  | 9.9E-1                  |
| <input type="checkbox"/> | GOTERM_BP_FAT   | <a href="#">protein amino acid phosphorylation</a>                                                           | RT |  | 149   | 8.1E-1  | 1.0E0                   |
| <input type="checkbox"/> | GOTERM_MF_FAT   | <a href="#">ribonucleotide binding</a>                                                                       | RT |  | 322   | 8.2E-1  | 1.0E0                   |
| <input type="checkbox"/> | GOTERM_MF_FAT   | <a href="#">purine ribonucleotide binding</a>                                                                | RT |  | 322   | 8.2E-1  | 1.0E0                   |
| <input type="checkbox"/> | GOTERM_MF_FAT   | <a href="#">protein kinase activity</a>                                                                      | RT |  | 150   | 8.2E-1  | 1.0E0                   |
| <input type="checkbox"/> | GOTERM_MF_FAT   | <a href="#">purine nucleotide binding</a>                                                                    | RT |  | 325   | 8.5E-1  | 1.0E0                   |
| <input type="checkbox"/> | INTERPRO        | <a href="#">Protein kinase, core</a>                                                                         | RT |  | 148   | 8.6E-1  | 1.0E0                   |
| <input type="checkbox"/> | GOTERM_MF_FAT   | <a href="#">adenyl ribonucleotide binding</a>                                                                | RT |  | 291   | 9.0E-1  | 1.0E0                   |
| <input type="checkbox"/> | GOTERM_MF_FAT   | <a href="#">ATP binding</a>                                                                                  | RT |  | 291   | 9.0E-1  | 1.0E0                   |
| <input type="checkbox"/> | GOTERM_MF_FAT   | <a href="#">nucleoside binding</a>                                                                           | RT |  | 297   | 9.1E-1  | 1.0E0                   |
| <input type="checkbox"/> | INTERPRO        | <a href="#">Serine/threonine protein kinase-related</a>                                                      | RT |  | 127   | 9.2E-1  | 1.0E0                   |
| <input type="checkbox"/> | GOTERM_MF_FAT   | <a href="#">purine nucleoside binding</a>                                                                    | RT |  | 294   | 9.2E-1  | 1.0E0                   |
| <input type="checkbox"/> | GOTERM_MF_FAT   | <a href="#">adenyl nucleotide binding</a>                                                                    | RT |  | 294   | 9.2E-1  | 1.0E0                   |
| Annotation Cluster 52    |                 | Enrichment Score: 0.1                                                                                        |    |  |       |         | Count P-Value Benjamini |
| <input type="checkbox"/> | GOTERM_BP_FAT   | <a href="#">regulation of transcription</a>                                                                  | RT |  | 20    | 4.1E-1  | 1.0E0                   |
| <input type="checkbox"/> | GOTERM_MF_FAT   | <a href="#">NAD or NADH binding</a>                                                                          | RT |  | 6     | 5.4E-1  | 1.0E0                   |
| <input type="checkbox"/> | GOTERM_BP_FAT   | <a href="#">regulation of RNA metabolic process</a>                                                          | RT |  | 8     | 6.0E-1  | 1.0E0                   |
| <input type="checkbox"/> | GOTERM_BP_FAT   | <a href="#">regulation of transcription, DNA-dependent</a>                                                   | RT |  | 8     | 6.0E-1  | 1.0E0                   |
| <input type="checkbox"/> | GOTERM_BP_FAT   | <a href="#">gene silencing</a>                                                                               | RT |  | 5     | 6.6E-1  | 1.0E0                   |
| <input type="checkbox"/> | GOTERM_BP_FAT   | <a href="#">negative regulation of gene expression</a>                                                       | RT |  | 5     | 6.6E-1  | 1.0E0                   |
| <input type="checkbox"/> | GOTERM_BP_FAT   | <a href="#">negative regulation of macromolecule metabolic process</a>                                       | RT |  | 5     | 6.6E-1  | 1.0E0                   |
| <input type="checkbox"/> | GOTERM_BP_FAT   | <a href="#">chromatin silencing</a>                                                                          | RT |  | 3     | 8.9E-1  | 1.0E0                   |
| <input type="checkbox"/> | GOTERM_BP_FAT   | <a href="#">negative regulation of cellular biosynthetic process</a>                                         | RT |  | 3     | 8.9E-1  | 1.0E0                   |
| <input type="checkbox"/> | GOTERM_BP_FAT   | <a href="#">negative regulation of RNA metabolic process</a>                                                 | RT |  | 3     | 8.9E-1  | 1.0E0                   |
| <input type="checkbox"/> | GOTERM_BP_FAT   | <a href="#">negative regulation of biosynthetic process</a>                                                  | RT |  | 3     | 8.9E-1  | 1.0E0                   |
| <input type="checkbox"/> | GOTERM_BP_FAT   | <a href="#">negative regulation of macromolecule biosynthetic process</a>                                    | RT |  | 3     | 8.9E-1  | 1.0E0                   |
| <input type="checkbox"/> | GOTERM_BP_FAT   | <a href="#">regulation of gene expression, epigenetic</a>                                                    | RT |  | 3     | 8.9E-1  | 1.0E0                   |
| <input type="checkbox"/> | GOTERM_BP_FAT   | <a href="#">negative regulation of transcription</a>                                                         | RT |  | 3     | 8.9E-1  | 1.0E0                   |
| <input type="checkbox"/> | GOTERM_BP_FAT   | <a href="#">negative regulation of nitrogen compound metabolic process</a>                                   | RT |  | 3     | 8.9E-1  | 1.0E0                   |
| <input type="checkbox"/> | GOTERM_BP_FAT   | <a href="#">negative regulation of nucleobase, nucleoside, nucleotide and nucleic acid metabolic process</a> | RT |  | 3     | 8.9E-1  | 1.0E0                   |
| <input type="checkbox"/> | GOTERM_BP_FAT   | <a href="#">negative regulation of gene expression, epigenetic</a>                                           | RT |  | 3     | 8.9E-1  | 1.0E0                   |
| <input type="checkbox"/> | GOTERM_BP_FAT   | <a href="#">negative regulation of transcription, DNA-dependent</a>                                          | RT |  | 3     | 8.9E-1  | 1.0E0                   |
| <input type="checkbox"/> | GOTERM_MF_FAT   | <a href="#">NAD binding</a>                                                                                  | RT |  | 3     | 8.9E-1  | 1.0E0                   |
| <input type="checkbox"/> | INTERPRO        | <a href="#">NAD-dependent histone deacetylase, silent information regulator Sir2</a>                         | RT |  | 3     | 9.0E-1  | 1.0E0                   |
| <input type="checkbox"/> | GOTERM_BP_FAT   | <a href="#">protein amino acid deacetylation</a>                                                             | RT |  | 3     | 9.5E-1  | 1.0E0                   |
| <input type="checkbox"/> | GOTERM_MF_FAT   | <a href="#">hydrolase activity, acting on carbon-nitrogen (but not peptide) bonds, in linear amides</a>      | RT |  | 3     | 9.9E-1  | 1.0E0                   |
| Annotation Cluster 53    |                 | Enrichment Score: 0.1                                                                                        |    |  |       |         | Count P-Value Benjamini |
| <input type="checkbox"/> | GOTERM_BP_FAT   | <a href="#">lipid biosynthetic process</a>                                                                   | RT |  | 9     | 6.2E-1  | 1.0E0                   |



| <input type="checkbox"/> | GOTERM_BP_FAT         | <a href="#">isoprenoid biosynthetic process</a>                  | RT |  |  |  |  | 3     | 8.9E-1  | 1.0E0     |  |  |
|--------------------------|-----------------------|------------------------------------------------------------------|----|--|--|--|--|-------|---------|-----------|--|--|
| <input type="checkbox"/> | GOTERM_BP_FAT         | <a href="#">isoprenoid metabolic process</a>                     | RT |  |  |  |  | 3     | 8.9E-1  | 1.0E0     |  |  |
|                          | Annotation Cluster 54 | Enrichment Score: 0.1                                            |    |  |  |  |  | Count | P_Value | Benjamini |  |  |
| <input type="checkbox"/> | GOTERM_BP_FAT         | <a href="#">membrane docking</a>                                 | RT |  |  |  |  | 3     | 7.9E-1  | 1.0E0     |  |  |
| <input type="checkbox"/> | GOTERM_BP_FAT         | <a href="#">exocytosis</a>                                       | RT |  |  |  |  | 3     | 7.9E-1  | 1.0E0     |  |  |
| <input type="checkbox"/> | GOTERM_BP_FAT         | <a href="#">secretion by cell</a>                                | RT |  |  |  |  | 3     | 7.9E-1  | 1.0E0     |  |  |
| <input type="checkbox"/> | GOTERM_BP_FAT         | <a href="#">secretion</a>                                        | RT |  |  |  |  | 3     | 7.9E-1  | 1.0E0     |  |  |
| <input type="checkbox"/> | GOTERM_BP_FAT         | <a href="#">vesicle docking during exocytosis</a>                | RT |  |  |  |  | 3     | 7.9E-1  | 1.0E0     |  |  |
| <input type="checkbox"/> | GOTERM_BP_FAT         | <a href="#">vesicle docking</a>                                  | RT |  |  |  |  | 3     | 7.9E-1  | 1.0E0     |  |  |
| <input type="checkbox"/> | INTERPRO              | <a href="#">Sec1-like protein</a>                                | RT |  |  |  |  | 3     | 8.0E-1  | 1.0E0     |  |  |
|                          | Annotation Cluster 55 | Enrichment Score: 0.1                                            |    |  |  |  |  | Count | P_Value | Benjamini |  |  |
| <input type="checkbox"/> | SP_PIR_KEYWORDS       | <a href="#">motor protein</a>                                    | RT |  |  |  |  | 15    | 5.6E-1  | 9.9E-1    |  |  |
| <input type="checkbox"/> | INTERPRO              | <a href="#">Kinesin_motor region, conserved site</a>             | RT |  |  |  |  | 11    | 6.9E-1  | 1.0E0     |  |  |
| <input type="checkbox"/> | SP_PIR_KEYWORDS       | <a href="#">microtubule</a>                                      | RT |  |  |  |  | 18    | 7.6E-1  | 1.0E0     |  |  |
| <input type="checkbox"/> | SMART                 | <a href="#">K1Sc</a>                                             | RT |  |  |  |  | 16    | 7.6E-1  | 1.0E0     |  |  |
| <input type="checkbox"/> | INTERPRO              | <a href="#">Kinesin_motor region</a>                             | RT |  |  |  |  | 16    | 7.7E-1  | 1.0E0     |  |  |
| <input type="checkbox"/> | GOTERM_MF_FAT         | <a href="#">motor activity</a>                                   | RT |  |  |  |  | 23    | 8.1E-1  | 1.0E0     |  |  |
| <input type="checkbox"/> | GOTERM_MF_FAT         | <a href="#">microtubule motor activity</a>                       | RT |  |  |  |  | 23    | 8.1E-1  | 1.0E0     |  |  |
| <input type="checkbox"/> | GOTERM_BP_FAT         | <a href="#">microtubule-based process</a>                        | RT |  |  |  |  | 29    | 8.4E-1  | 1.0E0     |  |  |
| <input type="checkbox"/> | GOTERM_BP_FAT         | <a href="#">microtubule-based movement</a>                       | RT |  |  |  |  | 25    | 8.6E-1  | 1.0E0     |  |  |
| <input type="checkbox"/> | GOTERM_CC_FAT         | <a href="#">microtubule</a>                                      | RT |  |  |  |  | 18    | 8.7E-1  | 1.0E0     |  |  |
| <input type="checkbox"/> | GOTERM_CC_FAT         | <a href="#">microtubule cytoskeleton</a>                         | RT |  |  |  |  | 28    | 9.0E-1  | 1.0E0     |  |  |
| <input type="checkbox"/> | GOTERM_CC_FAT         | <a href="#">cytoskeletal part</a>                                | RT |  |  |  |  | 28    | 9.0E-1  | 1.0E0     |  |  |
| <input type="checkbox"/> | GOTERM_CC_FAT         | <a href="#">cytoskeleton</a>                                     | RT |  |  |  |  | 29    | 9.1E-1  | 1.0E0     |  |  |
|                          | Annotation Cluster 56 | Enrichment Score: 0.09                                           |    |  |  |  |  | Count | P_Value | Benjamini |  |  |
| <input type="checkbox"/> | GOTERM_BP_FAT         | <a href="#">microtubule cytoskeleton organization</a>            | RT |  |  |  |  | 3     | 7.9E-1  | 1.0E0     |  |  |
| <input type="checkbox"/> | INTERPRO              | <a href="#">Spc97/Spc98</a>                                      | RT |  |  |  |  | 3     | 8.0E-1  | 1.0E0     |  |  |
| <input type="checkbox"/> | GOTERM_CC_FAT         | <a href="#">spindle pole</a>                                     | RT |  |  |  |  | 3     | 8.1E-1  | 1.0E0     |  |  |
| <input type="checkbox"/> | GOTERM_CC_FAT         | <a href="#">spindle</a>                                          | RT |  |  |  |  | 3     | 8.1E-1  | 1.0E0     |  |  |
| <input type="checkbox"/> | GOTERM_CC_FAT         | <a href="#">microtubule organizing center</a>                    | RT |  |  |  |  | 3     | 8.1E-1  | 1.0E0     |  |  |
|                          | Annotation Cluster 57 | Enrichment Score: 0.09                                           |    |  |  |  |  | Count | P_Value | Benjamini |  |  |
| <input type="checkbox"/> | INTERPRO              | <a href="#">RNA helicase, DEAD-box type, Q motif</a>             | RT |  |  |  |  | 12    | 4.0E-1  | 1.0E0     |  |  |
| <input type="checkbox"/> | GOTERM_MF_FAT         | <a href="#">ATPase activity</a>                                  | RT |  |  |  |  | 54    | 6.5E-1  | 1.0E0     |  |  |
| <input type="checkbox"/> | GOTERM_MF_FAT         | <a href="#">ATPase activity, coupled</a>                         | RT |  |  |  |  | 40    | 6.8E-1  | 1.0E0     |  |  |
| <input type="checkbox"/> | GOTERM_MF_FAT         | <a href="#">helicase activity</a>                                | RT |  |  |  |  | 29    | 8.5E-1  | 1.0E0     |  |  |
| <input type="checkbox"/> | INTERPRO              | <a href="#">DNA/RNA helicase, DEAD/DEAH box type, N-terminal</a> | RT |  |  |  |  | 16    | 8.7E-1  | 1.0E0     |  |  |
| <input type="checkbox"/> | GOTERM_MF_FAT         | <a href="#">purine NTP-dependent helicase activity</a>           | RT |  |  |  |  | 20    | 8.7E-1  | 1.0E0     |  |  |
| <input type="checkbox"/> | GOTERM_MF_FAT         | <a href="#">ATP-dependent helicase activity</a>                  | RT |  |  |  |  | 20    | 8.7E-1  | 1.0E0     |  |  |
| <input type="checkbox"/> | SP_PIR_KEYWORDS       | <a href="#">helicase</a>                                         | RT |  |  |  |  | 23    | 8.8E-1  | 9.9E-1    |  |  |
| <input type="checkbox"/> | SMART                 | <a href="#">HELICc</a>                                           | RT |  |  |  |  | 22    | 9.4E-1  | 1.0E0     |  |  |
| <input type="checkbox"/> | INTERPRO              | <a href="#">DNA/RNA helicase, C-terminal</a>                     | RT |  |  |  |  | 22    | 9.5E-1  | 1.0E0     |  |  |
| <input type="checkbox"/> | SMART                 | <a href="#">DEXDc</a>                                            | RT |  |  |  |  | 21    | 9.6E-1  | 1.0E0     |  |  |
| <input type="checkbox"/> | INTERPRO              | <a href="#">Helicase, superfamily 1 and 2, ATP-binding</a>       | RT |  |  |  |  | 21    | 9.6E-1  | 1.0E0     |  |  |
| <input type="checkbox"/> | INTERPRO              | <a href="#">DEAD-like helicase, N-terminal</a>                   | RT |  |  |  |  | 21    | 9.6E-1  | 1.0E0     |  |  |
|                          | Annotation Cluster 58 | Enrichment Score: 0.09                                           |    |  |  |  |  | Count | P_Value | Benjamini |  |  |
| <input type="checkbox"/> | SP_PIR_KEYWORDS       | <a href="#">Rotamase</a>                                         | RT |  |  |  |  | 5     | 7.9E-1  | 9.9E-1    |  |  |
| <input type="checkbox"/> | GOTERM_MF_FAT         | <a href="#">cis-trans isomerase activity</a>                     | RT |  |  |  |  | 5     | 7.9E-1  | 1.0E0     |  |  |
| <input type="checkbox"/> | GOTERM_MF_FAT         | <a href="#">peptidyl-prolyl cis-trans isomerase activity</a>     | RT |  |  |  |  | 5     | 7.9E-1  | 1.0E0     |  |  |
| <input type="checkbox"/> | INTERPRO              | <a href="#">Peptidyl-prolyl cis-trans isomerase, FKBP-type</a>   | RT |  |  |  |  | 4     | 8.0E-1  | 1.0E0     |  |  |
| <input type="checkbox"/> | GOTERM_BP_FAT         | <a href="#">protein folding</a>                                  | RT |  |  |  |  | 15    | 9.2E-1  | 1.0E0     |  |  |
|                          | Annotation Cluster 59 | Enrichment Score: 0.09                                           |    |  |  |  |  | Count | P_Value | Benjamini |  |  |
| <input type="checkbox"/> | SP_PIR_KEYWORDS       | <a href="#">Endonuclease</a>                                     | RT |  |  |  |  | 17    | 7.5E-1  | 1.0E0     |  |  |
| <input type="checkbox"/> | SP_PIR_KEYWORDS       | <a href="#">rna-directed dna polymerase</a>                      | RT |  |  |  |  | 13    | 7.7E-1  | 9.9E-1    |  |  |
| <input type="checkbox"/> | GOTERM_MF_FAT         | <a href="#">endonuclease activity</a>                            | RT |  |  |  |  | 19    | 7.7E-1  | 1.0E0     |  |  |
| <input type="checkbox"/> | GOTERM_MF_FAT         | <a href="#">nuclease activity</a>                                | RT |  |  |  |  | 27    | 8.4E-1  | 1.0E0     |  |  |
| <input type="checkbox"/> | GOTERM_MF_FAT         | <a href="#">RNA-directed DNA polymerase activity</a>             | RT |  |  |  |  | 13    | 8.4E-1  | 1.0E0     |  |  |
| <input type="checkbox"/> | GOTERM_MF_FAT         | <a href="#">nucleotidyltransferase activity</a>                  | RT |  |  |  |  | 39    | 8.4E-1  | 1.0E0     |  |  |
| <input type="checkbox"/> | GOTERM_MF_FAT         | <a href="#">DNA polymerase activity</a>                          | RT |  |  |  |  | 16    | 9.6E-1  | 1.0E0     |  |  |

| Annotation Cluster 60    |                 | Enrichment Score: 0.08                                                                              |    |  | Count | P_Value | Benjamini |
|--------------------------|-----------------|-----------------------------------------------------------------------------------------------------|----|--|-------|---------|-----------|
| <input type="checkbox"/> | GOTERM_BP_FAT   | <a href="#">proteolysis</a>                                                                         | RT |  | 51    | 6.0E-1  | 1.0E0     |
| <input type="checkbox"/> | GOTERM_BP_FAT   | <a href="#">proteolysis involved in cellular protein catabolic process</a>                          | RT |  | 19    | 7.0E-1  | 1.0E0     |
| <input type="checkbox"/> | GOTERM_BP_FAT   | <a href="#">cellular protein catabolic process</a>                                                  | RT |  | 19    | 7.0E-1  | 1.0E0     |
| <input type="checkbox"/> | SP_PIR_KEYWORDS | <a href="#">ubiquitination pathway</a>                                                              | RT |  | 8     | 7.1E-1  | 9.9E-1    |
| <input type="checkbox"/> | INTERPRO        | <a href="#">Proteasome, alpha and beta subunits</a>                                                 | RT |  | 8     | 7.3E-1  | 1.0E0     |
| <input type="checkbox"/> | GOTERM_BP_FAT   | <a href="#">cellular macromolecule catabolic process</a>                                            | RT |  | 19    | 7.7E-1  | 1.0E0     |
| <input type="checkbox"/> | SP_PIR_KEYWORDS | <a href="#">threonine protease</a>                                                                  | RT |  | 4     | 7.9E-1  | 9.9E-1    |
| <input type="checkbox"/> | GOTERM_BP_FAT   | <a href="#">protein catabolic process</a>                                                           | RT |  | 21    | 7.9E-1  | 1.0E0     |
| <input type="checkbox"/> | GOTERM_MF_FAT   | <a href="#">threonine-type peptidase activity</a>                                                   | RT |  | 8     | 8.1E-1  | 1.0E0     |
| <input type="checkbox"/> | GOTERM_MF_FAT   | <a href="#">threonine-type endopeptidase activity</a>                                               | RT |  | 8     | 8.1E-1  | 1.0E0     |
| <input type="checkbox"/> | INTERPRO        | <a href="#">Proteasome, subunit alpha/beta</a>                                                      | RT |  | 8     | 8.2E-1  | 1.0E0     |
| <input type="checkbox"/> | GOTERM_BP_FAT   | <a href="#">macromolecule catabolic process</a>                                                     | RT |  | 21    | 8.3E-1  | 1.0E0     |
| <input type="checkbox"/> | GOTERM_CC_FAT   | <a href="#">proteasome core complex</a>                                                             | RT |  | 8     | 8.4E-1  | 1.0E0     |
| <input type="checkbox"/> | GOTERM_BP_FAT   | <a href="#">modification-dependent protein catabolic process</a>                                    | RT |  | 14    | 8.4E-1  | 1.0E0     |
| <input type="checkbox"/> | GOTERM_BP_FAT   | <a href="#">modification-dependent macromolecule catabolic process</a>                              | RT |  | 14    | 8.4E-1  | 1.0E0     |
| <input type="checkbox"/> | SP_PIR_KEYWORDS | <a href="#">proteasome</a>                                                                          | RT |  | 10    | 9.1E-1  | 1.0E0     |
| <input type="checkbox"/> | GOTERM_BP_FAT   | <a href="#">ubiquitin-dependent protein catabolic process</a>                                       | RT |  | 7     | 9.2E-1  | 1.0E0     |
| <input type="checkbox"/> | PIR_SUPERFAMILY | PIRSF001212: multicatalytic endopeptidase complex chain C9                                          | RT |  | 3     | 9.6E-1  | 1.0E0     |
| <input type="checkbox"/> | GOTERM_CC_FAT   | <a href="#">proteasome complex</a>                                                                  | RT |  | 10    | 9.6E-1  | 1.0E0     |
| <input type="checkbox"/> | INTERPRO        | <a href="#">Proteasome, alpha-subunit, conserved site</a>                                           | RT |  | 3     | 9.8E-1  | 1.0E0     |
| <input type="checkbox"/> | GOTERM_CC_FAT   | <a href="#">cytosol</a>                                                                             | RT |  | 13    | 9.9E-1  | 1.0E0     |
| <input type="checkbox"/> | KEGG_PATHWAY    | <a href="#">Proteasome</a>                                                                          | RT |  | 12    | 9.9E-1  | 1.0E0     |
| Annotation Cluster 61    |                 | Enrichment Score: 0.08                                                                              |    |  | Count | P_Value | Benjamini |
| <input type="checkbox"/> | SP_PIR_KEYWORDS | <a href="#">tptr repeat</a>                                                                         | RT |  | 6     | 6.8E-1  | 9.9E-1    |
| <input type="checkbox"/> | INTERPRO        | <a href="#">Tetratricopeptide region</a>                                                            | RT |  | 14    | 7.4E-1  | 1.0E0     |
| <input type="checkbox"/> | INTERPRO        | <a href="#">Tetratricopeptide-like helical</a>                                                      | RT |  | 17    | 8.3E-1  | 1.0E0     |
| <input type="checkbox"/> | INTERPRO        | <a href="#">Tetratricopeptide TPR-1</a>                                                             | RT |  | 10    | 9.3E-1  | 1.0E0     |
| <input type="checkbox"/> | SMART           | <a href="#">TPR</a>                                                                                 | RT |  | 12    | 9.3E-1  | 1.0E0     |
| <input type="checkbox"/> | INTERPRO        | <a href="#">Tetratricopeptide repeat</a>                                                            | RT |  | 12    | 9.3E-1  | 1.0E0     |
| Annotation Cluster 62    |                 | Enrichment Score: 0.08                                                                              |    |  | Count | P_Value | Benjamini |
| <input type="checkbox"/> | GOTERM_BP_FAT   | <a href="#">translational initiation</a>                                                            | RT |  | 7     | 7.0E-1  | 1.0E0     |
| <input type="checkbox"/> | GOTERM_MF_FAT   | <a href="#">translation factor activity, nucleic acid binding</a>                                   | RT |  | 17    | 8.6E-1  | 1.0E0     |
| <input type="checkbox"/> | GOTERM_MF_FAT   | <a href="#">translation initiation factor activity</a>                                              | RT |  | 13    | 8.8E-1  | 1.0E0     |
| <input type="checkbox"/> | SP_PIR_KEYWORDS | <a href="#">Initiation factor</a>                                                                   | RT |  | 9     | 9.4E-1  | 1.0E0     |
| Annotation Cluster 63    |                 | Enrichment Score: 0.07                                                                              |    |  | Count | P_Value | Benjamini |
| <input type="checkbox"/> | GOTERM_BP_FAT   | <a href="#">protein amino acid dephosphorylation</a>                                                | RT |  | 8     | 7.1E-1  | 1.0E0     |
| <input type="checkbox"/> | GOTERM_MF_FAT   | <a href="#">protein tyrosine/serine/threonine phosphatase activity</a>                              | RT |  | 3     | 8.9E-1  | 1.0E0     |
| <input type="checkbox"/> | INTERPRO        | <a href="#">Protein-tyrosine phosphatase, dual specificity</a>                                      | RT |  | 3     | 9.0E-1  | 1.0E0     |
| <input type="checkbox"/> | INTERPRO        | <a href="#">Dual specificity phosphatase, catalytic domain</a>                                      | RT |  | 3     | 9.0E-1  | 1.0E0     |
| Annotation Cluster 64    |                 | Enrichment Score: 0.07                                                                              |    |  | Count | P_Value | Benjamini |
| <input type="checkbox"/> | INTERPRO        | <a href="#">Metallophosphoesterase</a>                                                              | RT |  | 13    | 6.4E-1  | 1.0E0     |
| <input type="checkbox"/> | SP_PIR_KEYWORDS | <a href="#">iron</a>                                                                                | RT |  | 11    | 8.2E-1  | 9.9E-1    |
| <input type="checkbox"/> | GOTERM_MF_FAT   | <a href="#">phosphoprotein phosphatase activity</a>                                                 | RT |  | 15    | 8.5E-1  | 1.0E0     |
| <input type="checkbox"/> | SMART           | <a href="#">PP2Ac</a>                                                                               | RT |  | 8     | 8.8E-1  | 1.0E0     |
| <input type="checkbox"/> | INTERPRO        | <a href="#">Serine/threonine-specific protein phosphatase and bis(5-nucleosyl)-tetraphosphatase</a> | RT |  | 8     | 8.8E-1  | 1.0E0     |
| <input type="checkbox"/> | PIR_SUPERFAMILY | PIRSF000908: serine/threonine-protein phosphatase, conventional type                                | RT |  | 4     | 9.5E-1  | 1.0E0     |
| <input type="checkbox"/> | GOTERM_MF_FAT   | <a href="#">iron ion binding</a>                                                                    | RT |  | 14    | 9.8E-1  | 1.0E0     |
| Annotation Cluster 65    |                 | Enrichment Score: 0.07                                                                              |    |  | Count | P_Value | Benjamini |
| <input type="checkbox"/> | GOTERM_MF_FAT   | <a href="#">acetyltransferase activity</a>                                                          | RT |  | 6     | 7.9E-1  | 1.0E0     |
| <input type="checkbox"/> | GOTERM_MF_FAT   | <a href="#">N-acyltransferase activity</a>                                                          | RT |  | 6     | 7.9E-1  | 1.0E0     |
| <input type="checkbox"/> | GOTERM_MF_FAT   | <a href="#">N-acetyltransferase activity</a>                                                        | RT |  | 5     | 8.7E-1  | 1.0E0     |
| <input type="checkbox"/> | INTERPRO        | <a href="#">GCN5-related N-acetyltransferase</a>                                                    | RT |  | 5     | 8.8E-1  | 1.0E0     |
| <input type="checkbox"/> | INTERPRO        | <a href="#">Acyl-CoA N-acyltransferase</a>                                                          | RT |  | 5     | 9.3E-1  | 1.0E0     |
| Annotation Cluster 66    |                 | Enrichment Score: 0.07                                                                              |    |  | Count | P_Value | Benjamini |

| <input type="checkbox"/> | Source          | Term                                                      | RT | Count                  | P_Value | Benjamini |
|--------------------------|-----------------|-----------------------------------------------------------|----|------------------------|---------|-----------|
| <input type="checkbox"/> | SP_PIR_KEYWORDS | <a href="#">dna replication</a>                           | RT | 6                      | 7.9E-1  | 9.9E-1    |
| <input type="checkbox"/> | GOTERM_BP_FAT   | <a href="#">DNA replication</a>                           | RT | 17                     | 8.9E-1  | 1.0E0     |
| <input type="checkbox"/> | KEGG_PATHWAY    | <a href="#">DNA replication</a>                           | RT | 11                     | 9.0E-1  | 1.0E0     |
| Annotation Cluster 67    |                 |                                                           |    | Enrichment Score: 0.06 |         |           |
| <input type="checkbox"/> | SMART           | <a href="#">MCM</a>                                       | RT | 4                      | 8.0E-1  | 1.0E0     |
| <input type="checkbox"/> | INTERPRO        | <a href="#">DNA-dependent ATPase MCM</a>                  | RT | 4                      | 8.0E-1  | 1.0E0     |
| <input type="checkbox"/> | KEGG_PATHWAY    | <a href="#">DNA replication</a>                           | RT | 11                     | 9.0E-1  | 1.0E0     |
| <input type="checkbox"/> | INTERPRO        | <a href="#">Nucleic acid-binding, OB-fold</a>             | RT | 8                      | 9.9E-1  | 1.0E0     |
| Annotation Cluster 68    |                 |                                                           |    | Enrichment Score: 0.06 |         |           |
| <input type="checkbox"/> | KEGG_PATHWAY    | <a href="#">Pyrimidine metabolism</a>                     | RT | 19                     | 7.6E-1  | 1.0E0     |
| <input type="checkbox"/> | SP_PIR_KEYWORDS | <a href="#">Transcription</a>                             | RT | 5                      | 7.9E-1  | 9.9E-1    |
| <input type="checkbox"/> | GOTERM_MF_FAT   | <a href="#">ribonucleoside binding</a>                    | RT | 3                      | 7.9E-1  | 1.0E0     |
| <input type="checkbox"/> | GOTERM_BP_FAT   | <a href="#">transcription</a>                             | RT | 14                     | 8.4E-1  | 1.0E0     |
| <input type="checkbox"/> | GOTERM_MF_FAT   | <a href="#">DNA-directed RNA polymerase activity</a>      | RT | 12                     | 8.8E-1  | 1.0E0     |
| <input type="checkbox"/> | GOTERM_MF_FAT   | <a href="#">RNA polymerase activity</a>                   | RT | 12                     | 9.2E-1  | 1.0E0     |
| <input type="checkbox"/> | KEGG_PATHWAY    | <a href="#">RNA polymerase</a>                            | RT | 9                      | 9.3E-1  | 1.0E0     |
| <input type="checkbox"/> | SP_PIR_KEYWORDS | <a href="#">nucleotidyltransferase</a>                    | RT | 12                     | 9.4E-1  | 1.0E0     |
| <input type="checkbox"/> | SP_PIR_KEYWORDS | <a href="#">dna-directed rna polymerase</a>               | RT | 6                      | 9.7E-1  | 1.0E0     |
| <input type="checkbox"/> | KEGG_PATHWAY    | <a href="#">Purine metabolism</a>                         | RT | 15                     | 9.8E-1  | 1.0E0     |
| Annotation Cluster 69    |                 |                                                           |    | Enrichment Score: 0.05 |         |           |
| <input type="checkbox"/> | GOTERM_BP_FAT   | <a href="#">carboxylic acid biosynthetic process</a>      | RT | 4                      | 8.8E-1  | 1.0E0     |
| <input type="checkbox"/> | GOTERM_BP_FAT   | <a href="#">organic acid biosynthetic process</a>         | RT | 4                      | 8.8E-1  | 1.0E0     |
| <input type="checkbox"/> | GOTERM_BP_FAT   | <a href="#">cellular amino acid biosynthetic process</a>  | RT | 3                      | 8.9E-1  | 1.0E0     |
| <input type="checkbox"/> | GOTERM_BP_FAT   | <a href="#">amine biosynthetic process</a>                | RT | 3                      | 9.5E-1  | 1.0E0     |
| Annotation Cluster 70    |                 |                                                           |    | Enrichment Score: 0.05 |         |           |
| <input type="checkbox"/> | KEGG_PATHWAY    | <a href="#">Mismatch repair</a>                           | RT | 8                      | 8.3E-1  | 1.0E0     |
| <input type="checkbox"/> | KEGG_PATHWAY    | <a href="#">DNA replication</a>                           | RT | 11                     | 9.0E-1  | 1.0E0     |
| <input type="checkbox"/> | KEGG_PATHWAY    | <a href="#">Nucleotide excision repair</a>                | RT | 7                      | 9.8E-1  | 1.0E0     |
| Annotation Cluster 71    |                 |                                                           |    | Enrichment Score: 0.05 |         |           |
| <input type="checkbox"/> | INTERPRO        | <a href="#">EF-Hand type</a>                              | RT | 10                     | 8.3E-1  | 1.0E0     |
| <input type="checkbox"/> | INTERPRO        | <a href="#">EF-HAND 1</a>                                 | RT | 11                     | 8.4E-1  | 1.0E0     |
| <input type="checkbox"/> | SP_PIR_KEYWORDS | <a href="#">calcium</a>                                   | RT | 8                      | 8.7E-1  | 9.9E-1    |
| <input type="checkbox"/> | INTERPRO        | <a href="#">EF-HAND 2</a>                                 | RT | 9                      | 8.8E-1  | 1.0E0     |
| <input type="checkbox"/> | SMART           | <a href="#">EFh</a>                                       | RT | 5                      | 9.6E-1  | 1.0E0     |
| <input type="checkbox"/> | INTERPRO        | <a href="#">Calcium-binding EF-hand</a>                   | RT | 5                      | 9.6E-1  | 1.0E0     |
| <input type="checkbox"/> | INTERPRO        | <a href="#">EF hand</a>                                   | RT | 5                      | 9.6E-1  | 1.0E0     |
| Annotation Cluster 72    |                 |                                                           |    | Enrichment Score: 0.05 |         |           |
| <input type="checkbox"/> | SP_PIR_KEYWORDS | <a href="#">Chaperone</a>                                 | RT | 7                      | 8.0E-1  | 9.9E-1    |
| <input type="checkbox"/> | SP_PIR_KEYWORDS | <a href="#">cytoplasm</a>                                 | RT | 10                     | 8.1E-1  | 9.9E-1    |
| <input type="checkbox"/> | INTERPRO        | <a href="#">Chaperonin Cpn60/TCP-1</a>                    | RT | 5                      | 8.8E-1  | 1.0E0     |
| <input type="checkbox"/> | INTERPRO        | <a href="#">Chaperone, tailless complex polypeptide 1</a> | RT | 4                      | 9.4E-1  | 1.0E0     |
| <input type="checkbox"/> | PIR_SUPERFAMILY | PIRSF002584: molecular chaperone t-complex-type           | RT | 4                      | 9.5E-1  | 1.0E0     |
| <input type="checkbox"/> | INTERPRO        | <a href="#">Chaperonin TCP-1, conserved site</a>          | RT | 4                      | 9.7E-1  | 1.0E0     |
| <input type="checkbox"/> | GOTERM_MF_FAT   | <a href="#">unfolded protein binding</a>                  | RT | 9                      | 9.8E-1  | 1.0E0     |
| Annotation Cluster 73    |                 |                                                           |    | Enrichment Score: 0.04 |         |           |
| <input type="checkbox"/> | INTERPRO        | <a href="#">Ribosomal RNA methyltransferase RrmJ/FtsJ</a> | RT | 3                      | 8.0E-1  | 1.0E0     |
| <input type="checkbox"/> | GOTERM_BP_FAT   | <a href="#">RNA methylation</a>                           | RT | 3                      | 8.9E-1  | 1.0E0     |
| <input type="checkbox"/> | GOTERM_BP_FAT   | <a href="#">methylation</a>                               | RT | 5                      | 9.3E-1  | 1.0E0     |
| <input type="checkbox"/> | GOTERM_BP_FAT   | <a href="#">biopolymer methylation</a>                    | RT | 3                      | 9.5E-1  | 1.0E0     |
| <input type="checkbox"/> | GOTERM_BP_FAT   | <a href="#">one-carbon metabolic process</a>              | RT | 5                      | 9.6E-1  | 1.0E0     |
| Annotation Cluster 74    |                 |                                                           |    | Enrichment Score: 0.04 |         |           |
| <input type="checkbox"/> | SMART           | <a href="#">EGF_Lam</a>                                   | RT | 14                     | 8.6E-1  | 1.0E0     |
| <input type="checkbox"/> | INTERPRO        | <a href="#">EGF-like, laminin</a>                         | RT | 14                     | 8.6E-1  | 1.0E0     |
| <input type="checkbox"/> | INTERPRO        | <a href="#">EGF</a>                                       | RT | 4                      | 8.9E-1  | 1.0E0     |
| <input type="checkbox"/> | INTERPRO        | <a href="#">EGF, extracellular</a>                        | RT | 12                     | 8.9E-1  | 1.0E0     |
| <input type="checkbox"/> | INTERPRO        | <a href="#">EGF-like, type 3</a>                          | RT | 14                     | 9.9E-1  | 1.0E0     |
| <input type="checkbox"/> | SP_PIR_KEYWORDS | <a href="#">egf-like domain</a>                           | RT | 6                      | 1.0E0   | 1.0E0     |
| Annotation Cluster 75    |                 |                                                           |    | Enrichment Score: 0.04 |         |           |
| <input type="checkbox"/> | SP_PIR_KEYWORDS | <a href="#">Aminotransferase</a>                          | RT | 3                      | 8.9E-1  | 9.9E-1    |

| <input type="checkbox"/> | Annotation Cluster    | Enrichment Score | Term                                                                                 | RT | Bar | Count | P_Value | Benjamini |
|--------------------------|-----------------------|------------------|--------------------------------------------------------------------------------------|----|-----|-------|---------|-----------|
| <input type="checkbox"/> | GOTERM_MF_FAT         | 0.04             | <a href="#">transaminase activity</a>                                                | RT |     | 3     | 8.9E-1  | 1.0EO     |
| <input type="checkbox"/> |                       |                  | <a href="#">transferase activity, transferring nitrogenous groups</a>                | RT |     | 3     | 9.7E-1  | 1.0EO     |
| <input type="checkbox"/> | Annotation Cluster 76 | 0.04             |                                                                                      |    |     | Count | P_Value | Benjamini |
| <input type="checkbox"/> | INTERPRO              | 0.03             | <a href="#">Myb_DNA-binding</a>                                                      | RT |     | 3     | 9.0E-1  | 1.0EO     |
| <input type="checkbox"/> | SMART                 |                  | <a href="#">SANT</a>                                                                 | RT |     | 5     | 9.3E-1  | 1.0EO     |
| <input type="checkbox"/> | INTERPRO              | 0.03             | <a href="#">SANT_DNA-binding</a>                                                     | RT |     | 5     | 9.3E-1  | 1.0EO     |
| <input type="checkbox"/> | Annotation Cluster 77 |                  | 0.03                                                                                 |    |     |       | Count   | P_Value   |
| <input type="checkbox"/> | INTERPRO              | 0.03             | <a href="#">Serine/threonine protein kinase, active site</a>                         | RT |     | 48    | 8.9E-1  | 1.0EO     |
| <input type="checkbox"/> | GOTERM_MF_FAT         |                  | <a href="#">protein serine/threonine kinase activity</a>                             | RT |     | 55    | 9.1E-1  | 1.0EO     |
| <input type="checkbox"/> | INTERPRO              | 0.03             | <a href="#">Serine/threonine protein kinase-related</a>                              | RT |     | 127   | 9.2E-1  | 1.0EO     |
| <input type="checkbox"/> | INTERPRO              |                  | <a href="#">Protein kinase, ATP binding site</a>                                     | RT |     | 42    | 9.5E-1  | 1.0EO     |
| <input type="checkbox"/> | SMART                 | 0.03             | <a href="#">S_TKc</a>                                                                | RT |     | 29    | 9.6E-1  | 1.0EO     |
| <input type="checkbox"/> | INTERPRO              |                  | <a href="#">Serine/threonine protein kinase</a>                                      | RT |     | 29    | 9.6E-1  | 1.0EO     |
| <input type="checkbox"/> | SP_PIR_KEYWORDS       | 0.03             | <a href="#">serine/threonine-protein kinase</a>                                      | RT |     | 29    | 9.8E-1  | 1.0EO     |
| <input type="checkbox"/> | Annotation Cluster 78 |                  | 0.03                                                                                 |    |     |       | Count   | P_Value   |
| <input type="checkbox"/> | GOTERM_MF_FAT         | 0.03             | <a href="#">pyridoxal phosphate binding</a>                                          | RT |     | 5     | 9.3E-1  | 1.0EO     |
| <input type="checkbox"/> | GOTERM_MF_FAT         |                  | <a href="#">vitamin B6 binding</a>                                                   | RT |     | 5     | 9.3E-1  | 1.0EO     |
| <input type="checkbox"/> | INTERPRO              | 0.03             | <a href="#">Pyridoxal phosphate-dependent transferase, major region, subdomain 1</a> | RT |     | 4     | 9.4E-1  | 1.0EO     |
| <input type="checkbox"/> | GOTERM_MF_FAT         |                  | <a href="#">vitamin binding</a>                                                      | RT |     | 5     | 9.6E-1  | 1.0EO     |
| <input type="checkbox"/> | Annotation Cluster 79 | 0.03             |                                                                                      |    |     | Count | P_Value | Benjamini |
| <input type="checkbox"/> | INTERPRO              | 0.02             | <a href="#">Dynein heavy chain</a>                                                   | RT |     | 6     | 9.3E-1  | 1.0EO     |
| <input type="checkbox"/> | GOTERM_CC_FAT         |                  | <a href="#">dynein complex</a>                                                       | RT |     | 6     | 9.4E-1  | 1.0EO     |
| <input type="checkbox"/> | GOTERM_CC_FAT         | 0.02             | <a href="#">microtubule associated complex</a>                                       | RT |     | 7     | 9.6E-1  | 1.0EO     |
| <input type="checkbox"/> | Annotation Cluster 80 |                  | 0.02                                                                                 |    |     |       | Count   | P_Value   |
| <input type="checkbox"/> | INTERPRO              | 0.02             | <a href="#">RNA-directed DNA polymerase (reverse transcriptase), related</a>         | RT |     | 3     | 9.0E-1  | 1.0EO     |
| <input type="checkbox"/> | GOTERM_BP_FAT         |                  | <a href="#">RNA-dependent DNA replication</a>                                        | RT |     | 3     | 9.7E-1  | 1.0EO     |
| <input type="checkbox"/> | INTERPRO              | 0.02             | <a href="#">RNA-directed DNA polymerase (reverse transcriptase)</a>                  | RT |     | 3     | 9.8E-1  | 1.0EO     |
| <input type="checkbox"/> | Annotation Cluster 81 |                  | 0.02                                                                                 |    |     |       | Count   | P_Value   |
| <input type="checkbox"/> | INTERPRO              | 0.01             | <a href="#">Thioredoxin, conserved site</a>                                          | RT |     | 4     | 8.0E-1  | 1.0EO     |
| <input type="checkbox"/> | INTERPRO              |                  | <a href="#">Thioredoxin-like subdomain</a>                                           | RT |     | 3     | 9.0E-1  | 1.0EO     |
| <input type="checkbox"/> | INTERPRO              | 0.01             | <a href="#">Thioredoxin domain</a>                                                   | RT |     | 3     | 9.5E-1  | 1.0EO     |
| <input type="checkbox"/> | INTERPRO              |                  | <a href="#">Thioredoxin, core</a>                                                    | RT |     | 3     | 9.8E-1  | 1.0EO     |
| <input type="checkbox"/> | INTERPRO              | 0.01             | <a href="#">Thioredoxin-like</a>                                                     | RT |     | 5     | 9.9E-1  | 1.0EO     |
| <input type="checkbox"/> | INTERPRO              |                  | <a href="#">Thioredoxin fold</a>                                                     | RT |     | 9     | 9.9E-1  | 1.0EO     |
| <input type="checkbox"/> | GOTERM_BP_FAT         | 0.01             | <a href="#">cell redox homeostasis</a>                                               | RT |     | 7     | 9.9E-1  | 1.0EO     |
| <input type="checkbox"/> | GOTERM_BP_FAT         |                  | <a href="#">cellular homeostasis</a>                                                 | RT |     | 7     | 9.9E-1  | 1.0EO     |
| <input type="checkbox"/> | GOTERM_BP_FAT         | 0.01             | <a href="#">homeostatic process</a>                                                  | RT |     | 7     | 1.0EO   | 1.0EO     |
| <input type="checkbox"/> | Annotation Cluster 82 |                  | 0.01                                                                                 |    |     |       | Count   | P_Value   |
| <input type="checkbox"/> | GOTERM_BP_FAT         | 0.01             | <a href="#">protein complex assembly</a>                                             | RT |     | 6     | 9.5E-1  | 1.0EO     |
| <input type="checkbox"/> | GOTERM_BP_FAT         |                  | <a href="#">protein complex biogenesis</a>                                           | RT |     | 6     | 9.5E-1  | 1.0EO     |
| <input type="checkbox"/> | GOTERM_BP_FAT         | 0.01             | <a href="#">cellular protein complex assembly</a>                                    | RT |     | 5     | 9.6E-1  | 1.0EO     |
| <input type="checkbox"/> | GOTERM_BP_FAT         |                  | <a href="#">protein polymerization</a>                                               | RT |     | 3     | 9.9E-1  | 1.0EO     |
| <input type="checkbox"/> | INTERPRO              | 0.01             | <a href="#">Tubulin</a>                                                              | RT |     | 3     | 9.9E-1  | 1.0EO     |
| <input type="checkbox"/> | INTERPRO              |                  | <a href="#">Tubulin/FtsZ, GTPase domain</a>                                          | RT |     | 3     | 9.9E-1  | 1.0EO     |
| <input type="checkbox"/> | INTERPRO              | 0.01             | <a href="#">Tubulin, conserved site</a>                                              | RT |     | 3     | 9.9E-1  | 1.0EO     |
| <input type="checkbox"/> | Annotation Cluster 83 |                  | 0.01                                                                                 |    |     |       | Count   | P_Value   |
| <input type="checkbox"/> | GOTERM_MF_FAT         | 0.01             | <a href="#">4 iron, 4 sulfur cluster binding</a>                                     | RT |     | 4     | 9.3E-1  | 1.0EO     |
| <input type="checkbox"/> | INTERPRO              |                  | <a href="#">4Fe-4S ferredoxin, iron-sulphur binding domain</a>                       | RT |     | 4     | 9.7E-1  | 1.0EO     |
| <input type="checkbox"/> | INTERPRO              | 0.01             | <a href="#">4Fe-4S ferredoxin, iron-sulphur binding, subgroup</a>                    | RT |     | 4     | 9.7E-1  | 1.0EO     |
| <input type="checkbox"/> | INTERPRO              |                  | <a href="#">4Fe-4S ferredoxin, iron-sulphur binding, conserved site</a>              | RT |     | 3     | 9.8E-1  | 1.0EO     |
| <input type="checkbox"/> | GOTERM_MF_FAT         | 0.01             | <a href="#">iron-sulfur cluster binding</a>                                          | RT |     | 8     | 9.9E-1  | 1.0EO     |
| <input type="checkbox"/> | GOTERM_MF_FAT         |                  | <a href="#">metal cluster binding</a>                                                | RT |     | 8     | 9.9E-1  | 1.0EO     |
| <input type="checkbox"/> | GOTERM_MF_FAT         | 0.01             | <a href="#">electron carrier activity</a>                                            | RT |     | 9     | 9.9E-1  | 1.0EO     |

201 terms were not clustered.

Please cite [Nature Protocols 2009; 4\(1\):44 & Genome Biology 2003; 4\(5\):P3](#) within any publication that makes use of any methods inspired by DAVID.

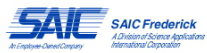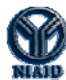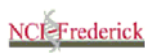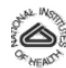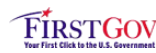

[Term of Service](#) | [Contact Us](#) | [Site Map](#)
